# Supplementary material for: Analysis of DES Plaintext Recovery Based on BP Neural Network
Source: Hindawi journal article supplement (doi:10.1155/2019/9580862), 2019-11-11
Supplement: f1 [file 9580862.f1.zip]

Archive with 21 entries (20 files):
- 9580862.f1/cipherMaterial0.txt
- 9580862.f1/cipherMaterial1.txt
- 9580862.f1/cipherMaterial2.txt
- 9580862.f1/cipherMaterial3.txt
- 9580862.f1/cipherMaterial4.txt
- 9580862.f1/cipherMaterial5.txt
- 9580862.f1/cipherMaterial6.txt
- 9580862.f1/cipherMaterial7.txt
- 9580862.f1/cipherMaterial8.txt
- 9580862.f1/cipherMaterial9.txt
- 9580862.f1/plain/
- 9580862.f1/plain/plain0
- 9580862.f1/plain/plain1
- 9580862.f1/plain/plain2
- 9580862.f1/plain/plain3
- 9580862.f1/plain/plain4
- 9580862.f1/plain/plain5
- 9580862.f1/plain/plain6
- 9580862.f1/plain/plain7
- 9580862.f1/plain/plain8
- 9580862.f1/plain/plain9
