# Supplementary material for: Analysis of DES Plaintext Recovery Based on BP Neural Network
Source: Hindawi journal article supplement (doi:10.1155/2019/9580862), 2019-11-11
Supplement: f1 [file 9580862.f1.zip › 9580862.f1/plain/plain0]

[8, 222, 192, 239, 190, 1, 128, 16, 8, 1, 1, 2, 139, 220, 6, 2, 1, 91, 39, 220, 6, 215, 35, 138, 19, 139, 220, 6, 13, 10, 1, 8, 222, 192, 239, 190, 1, 128, 16, 8, 1, 1, 2, 11, 187, 6, 2, 1, 90, 168, 186, 6, 40, 35, 234, 126, 1, 11, 187, 6, 9, 2, 2, 218, 2, 1, 218, 15, 180, 15, 142, 15, 104, 15, 66, 15, 28, 15, 246, 14, 208, 14, 170, 14, 132, 14, 94, 14, 56, 14, 18, 14, 236, 13, 198, 13, 160, 13, 122, 13, 84, 13, 46, 13, 8, 13, 226, 12, 188, 12, 150, 12, 112, 12, 74, 12, 36, 12, 254, 11, 216, 11, 178, 11, 140, 11, 102, 11, 64, 11, 26, 11, 244, 13, 10, 206, 13, 10, 168, 13, 10, 130, 13, 10, 92, 13, 10, 54, 13, 10, 16, 13, 10, 234, 9, 196, 9, 158, 9, 120, 9, 82, 9, 44, 9, 6, 9, 224, 8, 186, 8, 148, 8, 110, 8, 72, 8, 34, 8, 252, 7, 214, 7, 176, 7, 138, 7, 100, 7, 62, 7, 24, 7, 242, 6, 204, 6, 166, 6, 128, 6, 90, 6, 52, 6, 14, 6, 232, 5, 194, 5, 156, 5, 118, 5, 80, 5, 42, 5, 4, 5, 222, 4, 184, 4, 146, 4, 108, 4, 70, 4, 32, 4, 250, 3, 212, 3, 174, 3, 136, 3, 98, 3, 60, 3, 22, 3, 240, 2, 202, 2, 164, 2, 126, 2, 88, 2, 50, 2, 12, 2, 230, 1, 192, 1, 154, 1, 116, 1, 78, 1, 40, 1, 2, 1, 220, 17, 3, 1, 21, 48, 48, 48, 48, 48, 49, 48, 49, 95, 49, 57, 49, 95, 48, 48, 52, 55, 46, 106, 112, 103, 88, 19, 16, 3, 1, 21, 48, 48, 48, 48, 48, 49, 48, 48, 95, 49, 49, 57, 95, 48, 48, 54, 50, 46, 106, 112, 103, 39, 19, 16, 3, 1, 21, 48, 48, 48, 48, 48, 48, 57, 57, 95, 48, 57, 50, 95, 48, 49, 53, 51, 46, 106, 112, 103, 246, 18, 17, 3, 1, 21, 48, 48, 48, 48, 48, 48, 57, 56, 95, 49, 54, 57, 95, 48, 48, 49, 49, 46, 106, 112, 103, 197, 18, 16, 3, 1, 21, 48, 48, 48, 48, 48, 48, 57, 55, 95, 48, 55, 55, 95, 48, 48, 51, 48, 46, 106, 112, 103, 148, 18, 17, 3, 1, 21, 48, 48, 48, 48, 48, 48, 57, 54, 95, 50, 53, 55, 95, 48, 54, 53, 52, 46, 106, 112, 103, 99, 18, 17, 3, 1, 21, 48, 48, 48, 48, 48, 48, 57, 53, 95, 49, 52, 51, 95, 48, 49, 49, 53, 46, 106, 112, 103, 50, 18, 17, 3, 1, 21, 48, 48, 48, 48, 48, 48, 57, 52, 95, 50, 50, 49, 95, 48, 48, 53, 48, 46, 106, 112, 103, 1, 18, 16, 3, 1, 21, 48, 48, 48, 48, 48, 48, 57, 51, 95, 48, 56, 56, 95, 48, 48, 49, 50, 46, 106, 112, 103, 208, 17, 16, 3, 1, 21, 48, 48, 48, 48, 48, 48, 57, 50, 95, 48, 53, 54, 95, 48, 48, 57, 49, 46, 106, 112, 103, 159, 17, 16, 3, 1, 21, 48, 48, 48, 48, 48, 48, 57, 49, 95, 48, 48, 53, 95, 48, 48, 49, 55, 46, 106, 112, 103, 110, 17, 16, 3, 1, 21, 48, 48, 48, 48, 48, 48, 57, 48, 95, 48, 57, 51, 95, 48, 48, 57, 52, 46, 106, 112, 103, 61, 17, 17, 3, 1, 21, 48, 48, 48, 48, 48, 48, 56, 57, 95, 49, 56, 48, 95, 48, 48, 51, 51, 46, 106, 112, 103, 12, 17, 16, 3, 1, 21, 48, 48, 48, 48, 48, 48, 56, 56, 95, 48, 56, 48, 95, 48, 48, 56, 53, 46, 106, 112, 103, 219, 16, 16, 3, 1, 21, 48, 48, 48, 48, 48, 48, 56, 55, 95, 48, 49, 56, 95, 48, 48, 53, 57, 46, 106, 112, 103, 170, 16, 17, 3, 1, 21, 48, 48, 48, 48, 48, 48, 56, 54, 95, 50, 51, 50, 95, 48, 49, 53, 55, 46, 106, 112, 103, 121, 16, 17, 3, 1, 21, 48, 48, 48, 48, 48, 48, 56, 53, 95, 49, 52, 53, 95, 48, 54, 54, 51, 46, 106, 112, 103, 72, 16, 16, 3, 1, 21, 48, 48, 48, 48, 48, 48, 56, 52, 95, 49, 49, 49, 95, 48, 48, 55, 55, 46, 106, 112, 103, 23, 16, 17, 3, 1, 21, 48, 48, 48, 48, 48, 48, 56, 51, 95, 50, 53, 55, 95, 48, 48, 50, 53, 46, 106, 112, 103, 230, 15, 17, 3, 1, 21, 48, 48, 48, 48, 48, 48, 56, 50, 95, 50, 53, 49, 95, 48, 49, 56, 56, 46, 106, 112, 103, 181, 15, 17, 3, 1, 21, 48, 48, 48, 48, 48, 48, 56, 49, 95, 49, 56, 57, 95, 48, 48, 52, 57, 46, 106, 112, 103, 132, 15, 16, 3, 1, 21, 48, 48, 48, 48, 48, 48, 56, 48, 95, 48, 52, 48, 95, 48, 49, 48, 49, 46, 106, 112, 103, 83, 15, 16, 3, 1, 21, 48, 48, 48, 48, 48, 48, 55, 57, 95, 48, 53, 52, 95, 48, 48, 54, 48, 46, 106, 112, 103, 34, 15, 17, 3, 1, 21, 48, 48, 48, 48, 48, 48, 55, 56, 95, 49, 51, 54, 95, 48, 48, 51, 48, 46, 106, 112, 103, 241, 14, 17, 3, 1, 21, 48, 48, 48, 48, 48, 48, 55, 55, 95, 49, 53, 49, 95, 48, 48, 56, 56, 46, 106, 112, 103, 192, 14, 17, 3, 1, 21, 48, 48, 48, 48, 48, 48, 55, 54, 95, 50, 49, 50, 95, 48, 49, 50, 56, 46, 106, 112, 103, 143, 14, 16, 3, 1, 21, 48, 48, 48, 48, 48, 48, 55, 53, 95, 48, 54, 49, 95, 48, 48, 56, 52, 46, 106, 112, 103, 94, 14, 16, 3, 1, 21, 48, 48, 48, 48, 48, 48, 55, 52, 95, 48, 52, 56, 95, 48, 48, 57, 54, 46, 106, 112, 103, 45, 14, 17, 3, 1, 21, 48, 48, 48, 48, 48, 48, 55, 51, 95, 50, 53, 54, 95, 48, 48, 54, 57, 46, 106, 112, 103, 252, 13, 17, 3, 1, 21, 48, 48, 48, 48, 48, 48, 55, 50, 95, 50, 51, 50, 95, 48, 51, 50, 49, 46, 106, 112, 103, 203, 13, 17, 3, 1, 21, 48, 48, 48, 48, 48, 48, 55, 49, 95, 49, 52, 55, 95, 48, 48, 48, 52, 46, 106, 112, 103, 154, 13, 16, 3, 1, 21, 48, 48, 48, 48, 48, 48, 55, 48, 95, 48, 57, 48, 95, 48, 48, 50, 51, 46, 106, 112, 103, 105, 13, 17, 3, 1, 21, 48, 48, 48, 48, 48, 48, 54, 57, 95, 50, 53, 55, 95, 48, 55, 50, 56, 46, 106, 112, 103, 56, 13, 17, 3, 1, 21, 48, 48, 48, 48, 48, 48, 54, 56, 95, 49, 54, 52, 95, 48, 48, 50, 53, 46, 106, 112, 103, 7, 13, 16, 3, 1, 21, 48, 48, 48, 48, 48, 48, 54, 55, 95, 49, 48, 54, 95, 48, 48, 54, 50, 46, 106, 112, 103, 214, 12, 16, 3, 1, 21, 48, 48, 48, 48, 48, 48, 54, 54, 95, 48, 55, 51, 95, 48, 48, 55, 57, 46, 106, 112, 103, 165, 12, 17, 3, 1, 21, 48, 48, 48, 48, 48, 48, 54, 53, 95, 50, 51, 52, 95, 48, 48, 51, 52, 46, 106, 112, 103, 116, 12, 17, 3, 1, 21, 48, 48, 48, 48, 48, 48, 54, 52, 95, 50, 52, 57, 95, 48, 48, 54, 53, 46, 106, 112, 103, 67, 12, 16, 3, 1, 21, 48, 48, 48, 48, 48, 48, 54, 51, 95, 48, 56, 51, 95, 48, 48, 55, 53, 46, 106, 112, 103, 18, 12, 16, 3, 1, 21, 48, 48, 48, 48, 48, 48, 54, 50, 95, 48, 51, 56, 95, 48, 48, 57, 50, 46, 106, 112, 103, 225, 11, 17, 3, 1, 21, 48, 48, 48, 48, 48, 48, 54, 49, 95, 50, 53, 55, 95, 48, 50, 51, 49, 46, 106, 112, 103, 176, 11, 16, 3, 1, 21, 48, 48, 48, 48, 48, 48, 54, 48, 95, 48, 52, 50, 95, 48, 48, 51, 50, 46, 106, 112, 103, 127, 11, 17, 3, 1, 21, 48, 48, 48, 48, 48, 48, 53, 57, 95, 50, 49, 54, 95, 48, 48, 57, 48, 46, 106, 112, 103, 78, 11, 16, 3, 1, 21, 48, 48, 48, 48, 48, 48, 53, 56, 95, 48, 48, 52, 95, 48, 48, 52, 49, 46, 106, 112, 103, 29, 11, 17, 3, 1, 21, 48, 48, 48, 48, 48, 48, 53, 55, 95, 50, 53, 51, 95, 48, 49, 53, 56, 46, 106, 112, 103, 236, 13, 10, 17, 3, 1, 21, 48, 48, 48, 48, 48, 48, 53, 54, 95, 50, 50, 53, 95, 48, 48, 51, 50, 46, 106, 112, 103, 187, 13, 10, 17, 3, 1, 21, 48, 48, 48, 48, 48, 48, 53, 53, 95, 49, 52, 49, 95, 48, 48, 51, 53, 46, 106, 112, 103, 138, 13, 10, 16, 3, 1, 21, 48, 48, 48, 48, 48, 48, 53, 52, 95, 49, 48, 55, 95, 48, 48, 54, 54, 46, 106, 112, 103, 89, 13, 10, 17, 3, 1, 21, 48, 48, 48, 48, 48, 48, 53, 51, 95, 49, 52, 50, 95, 48, 48, 54, 57, 46, 106, 112, 103, 40, 13, 10, 17, 3, 1, 21, 48, 48, 48, 48, 48, 48, 53, 50, 95, 49, 54, 48, 95, 48, 48, 55, 50, 46, 106, 112, 103, 247, 9, 16, 3, 1, 21, 48, 48, 48, 48, 48, 48, 53, 49, 95, 48, 51, 56, 95, 48, 48, 50, 56, 46, 106, 112, 103, 198, 9, 17, 3, 1, 21, 48, 48, 48, 48, 48, 48, 53, 48, 95, 49, 54, 57, 95, 48, 48, 53, 52, 46, 106, 112, 103, 149, 9, 16, 3, 1, 21, 48, 48, 48, 48, 48, 48, 52, 57, 95, 49, 48, 57, 95, 48, 49, 52, 55, 46, 106, 112, 103, 100, 9, 17, 3, 1, 21, 48, 48, 48, 48, 48, 48, 52, 56, 95, 49, 52, 53, 95, 48, 52, 54, 51, 46, 106, 112, 103, 51, 9, 17, 3, 1, 21, 48, 48, 48, 48, 48, 48, 52, 55, 95, 49, 54, 55, 95, 48, 48, 56, 48, 46, 106, 112, 103, 2, 9, 17, 3, 1, 21, 48, 48, 48, 48, 48, 48, 52, 54, 95, 50, 49, 56, 95, 48, 48, 49, 51, 46, 106, 112, 103, 209, 8, 17, 3, 1, 21, 48, 48, 48, 48, 48, 48, 52, 53, 95, 49, 53, 51, 95, 48, 48, 55, 55, 46, 106, 112, 103, 160, 8, 16, 3, 1, 21, 48, 48, 48, 48, 48, 48, 52, 52, 95, 48, 50, 52, 95, 48, 48, 52, 49, 46, 106, 112, 103, 111, 8, 17, 3, 1, 21, 48, 48, 48, 48, 48, 48, 52, 51, 95, 50, 50, 54, 95, 48, 48, 57, 56, 46, 106, 112, 103, 62, 8, 17, 3, 1, 21, 48, 48, 48, 48, 48, 48, 52, 50, 95, 50, 50, 55, 95, 48, 49, 48, 51, 46, 106, 112, 103, 13, 8, 17, 3, 1, 21, 48, 48, 48, 48, 48, 48, 52, 49, 95, 49, 51, 54, 95, 48, 48, 49, 49, 46, 106, 112, 103, 220, 7, 17, 3, 1, 21, 48, 48, 48, 48, 48, 48, 52, 48, 95, 49, 55, 56, 95, 48, 48, 49, 57, 46, 106, 112, 103, 171, 7, 17, 3, 1, 21, 48, 48, 48, 48, 48, 48, 51, 57, 95, 50, 49, 48, 95, 48, 48, 56, 51, 46, 106, 112, 103, 122, 7, 17, 3, 1, 21, 48, 48, 48, 48, 48, 48, 51, 56, 95, 49, 51, 57, 95, 48, 48, 50, 49, 46, 106, 112, 103, 73, 7, 16, 3, 1, 21, 48, 48, 48, 48, 48, 48, 51, 55, 95, 48, 55, 55, 95, 48, 48, 55, 49, 46, 106, 112, 103, 24, 7, 17, 3, 1, 21, 48, 48, 48, 48, 48, 48, 51, 54, 95, 49, 52, 53, 95, 48, 50, 48, 50, 46, 106, 112, 103, 231, 6, 16, 3, 1, 21, 48, 48, 48, 48, 48, 48, 51, 53, 95, 48, 49, 49, 95, 48, 49, 55, 55, 46, 106, 112, 103, 182, 6, 16, 3, 1, 21, 48, 48, 48, 48, 48, 48, 51, 52, 95, 48, 52, 53, 95, 48, 48, 48, 52, 46, 106, 112, 103, 133, 6, 17, 3, 1, 21, 48, 48, 48, 48, 48, 48, 51, 51, 95, 49, 56, 54, 95, 48, 48, 51, 53, 46, 106, 112, 103, 84, 6, 16, 3, 1, 21, 48, 48, 48, 48, 48, 48, 51, 50, 95, 48, 51, 57, 95, 48, 48, 53, 50, 46, 106, 112, 103, 35, 6, 17, 3, 1, 21, 48, 48, 48, 48, 48, 48, 51, 49, 95, 49, 57, 52, 95, 48, 49, 48, 51, 46, 106, 112, 103, 242, 5, 17, 3, 1, 21, 48, 48, 48, 48, 48, 48, 51, 48, 95, 49, 53, 52, 95, 48, 48, 52, 48, 46, 106, 112, 103, 193, 5, 16, 3, 1, 21, 48, 48, 48, 48, 48, 48, 50, 57, 95, 48, 51, 50, 95, 48, 49, 48, 48, 46, 106, 112, 103, 144, 5, 16, 3, 1, 21, 48, 48, 48, 48, 48, 48, 50, 56, 95, 48, 51, 50, 95, 48, 48, 52, 54, 46, 106, 112, 103, 95, 5, 17, 3, 1, 21, 48, 48, 48, 48, 48, 48, 50, 55, 95, 49, 51, 53, 95, 48, 48, 56, 54, 46, 106, 112, 103, 46, 5, 17, 3, 1, 21, 48, 48, 48, 48, 48, 48, 50, 54, 95, 49, 53, 50, 95, 48, 49, 49, 49, 46, 106, 112, 103, 253, 4, 17, 3, 1, 21, 48, 48, 48, 48, 48, 48, 50, 53, 95, 50, 53, 51, 95, 48, 51, 51, 55, 46, 106, 112, 103, 204, 4, 16, 3, 1, 21, 48, 48, 48, 48, 48, 48, 50, 52, 95, 48, 48, 51, 95, 48, 48, 57, 56, 46, 106, 112, 103, 155, 4, 17, 3, 1, 21, 48, 48, 48, 48, 48, 48, 50, 51, 95, 50, 53, 49, 95, 48, 54, 57, 49, 46, 106, 112, 103, 106, 4, 17, 3, 1, 21, 48, 48, 48, 48, 48, 48, 50, 50, 95, 49, 51, 55, 95, 48, 48, 49, 48, 46, 106, 112, 103, 57, 4, 16, 3, 1, 21, 48, 48, 48, 48, 48, 48, 50, 49, 95, 48, 48, 51, 95, 48, 48, 50, 51, 46, 106, 112, 103, 8, 4, 17, 3, 1, 21, 48, 48, 48, 48, 48, 48, 50, 48, 95, 49, 52, 55, 95, 48, 49, 52, 49, 46, 106, 112, 103, 215, 3, 16, 3, 1, 21, 48, 48, 48, 48, 48, 48, 49, 57, 95, 48, 50, 53, 95, 48, 48, 50, 48, 46, 106, 112, 103, 166, 3, 16, 3, 1, 21, 48, 48, 48, 48, 48, 48, 49, 56, 95, 48, 51, 52, 95, 48, 48, 48, 53, 46, 106, 112, 103, 117, 3, 16, 3, 1, 21, 48, 48, 48, 48, 48, 48, 49, 55, 95, 48, 49, 49, 95, 48, 49, 56, 53, 46, 106, 112, 103, 68, 3, 17, 3, 1, 21, 48, 48, 48, 48, 48, 48, 49, 54, 95, 50, 48, 54, 95, 48, 48, 55, 50, 46, 106, 112, 103, 19, 3, 16, 3, 1, 21, 48, 48, 48, 48, 48, 48, 49, 53, 95, 48, 49, 52, 95, 48, 48, 50, 57, 46, 106, 112, 103, 226, 2, 17, 3, 1, 21, 48, 48, 48, 48, 48, 48, 49, 52, 95, 50, 48, 51, 95, 48, 48, 50, 57, 46, 106, 112, 103, 177, 2, 16, 3, 1, 21, 48, 48, 48, 48, 48, 48, 49, 51, 95, 49, 48, 53, 95, 48, 50, 52, 49, 46, 106, 112, 103, 128, 2, 17, 3, 1, 21, 48, 48, 48, 48, 48, 48, 49, 50, 95, 50, 48, 49, 95, 48, 48, 49, 55, 46, 106, 112, 103, 79, 2, 17, 3, 1, 21, 48, 48, 48, 48, 48, 48, 49, 49, 95, 50, 53, 55, 95, 48, 55, 57, 51, 46, 106, 112, 103, 30, 2, 16, 3, 1, 21, 48, 48, 48, 48, 48, 48, 49, 48, 95, 48, 54, 52, 95, 48, 49, 49, 54, 46, 106, 112, 103, 237, 1, 16, 3, 1, 21, 48, 48, 48, 48, 48, 48, 48, 57, 95, 49, 49, 56, 95, 48, 48, 51, 54, 46, 106, 112, 103, 188, 1, 17, 3, 1, 21, 48, 48, 48, 48, 48, 48, 48, 56, 95, 49, 52, 48, 95, 48, 48, 48, 50, 46, 106, 112, 103, 139, 1, 17, 3, 1, 21, 48, 48, 48, 48, 48, 48, 48, 55, 95, 50, 50, 51, 95, 48, 48, 53, 53, 46, 106, 112, 103, 90, 1, 17, 3, 1, 21, 48, 48, 48, 48, 48, 48, 48, 54, 95, 50, 52, 51, 95, 48, 48, 56, 48, 46, 106, 112, 103, 41, 1, 16, 3, 1, 21, 48, 48, 48, 48, 48, 48, 48, 53, 95, 49, 50, 56, 95, 48, 48, 56, 51, 46, 106, 112, 103, 248, 17, 3, 1, 21, 48, 48, 48, 48, 48, 48, 48, 52, 95, 50, 53, 55, 95, 48, 52, 56, 53, 46, 106, 112, 103, 199, 17, 3, 1, 21, 48, 48, 48, 48, 48, 48, 48, 51, 95, 50, 53, 51, 95, 48, 48, 52, 50, 46, 106, 112, 103, 150, 16, 3, 1, 21, 48, 48, 48, 48, 48, 48, 48, 50, 95, 49, 49, 51, 95, 48, 48, 57, 53, 46, 106, 112, 103, 101, 17, 3, 1, 21, 48, 48, 48, 48, 48, 48, 48, 49, 95, 50, 53, 51, 95, 48, 48, 56, 56, 46, 106, 112, 103, 52, 17, 3, 1, 21, 48, 48, 48, 48, 48, 48, 48, 48, 95, 49, 52, 51, 95, 48, 49, 49, 56, 46, 106, 112, 103, 3, 3, 4, 49, 8, 3, 16, 128, 2, 24, 128, 2, 34, 128, 128, 12, 2, 5, 3, 2, 1, 1, 1, 4, 4, 5, 16, 24, 34, 53, 50, 74, 46, 26, 54, 39, 45, 34, 35, 67, 43, 32, 57, 20, 18, 46, 30, 33, 59, 24, 7, 4, 7, 3, 8, 6, 4, 4, 9, 21, 46, 60, 84, 74, 39, 108, 140, 141, 180, 118, 149, 183, 138, 174, 104, 83, 119, 101, 125, 152, 173, 170, 112, 165, 172, 179, 103, 141, 183, 159, 173, 156, 152, 121, 50, 106, 118, 83, 64, 46, 72, 95, 71, 47, 32, 25, 31, 32, 29, 26, 108, 159, 157, 187, 198, 202, 203, 204, 204, 204, 204, 205, 205, 204, 204, 204, 204, 204, 204, 204, 204, 204, 204, 204, 204, 204, 204, 204, 204, 204, 204, 204, 204, 203, 204, 203, 203, 204, 205, 205, 205, 206, 206, 206, 206, 205, 205, 206, 206, 205, 204, 204, 204, 204, 204, 204, 205, 205, 205, 205, 205, 204, 204, 204, 205, 207, 205, 204, 204, 205, 204, 204, 204, 205, 206, 204, 204, 205, 206, 205, 204, 203, 204, 205, 205, 205, 205, 204, 205, 205, 205, 205, 205, 205, 204, 204, 204, 204, 204, 204, 204, 204, 204, 204, 204, 204, 204, 204, 204, 204, 204, 205, 204, 203, 205, 205, 204, 204, 204, 204, 204, 205, 205, 204, 203, 203, 203, 204, 204, 204, 203, 203, 203, 203, 205, 205, 205, 204, 203, 203, 203, 203, 203, 202, 202, 201, 201, 200, 200, 199, 200, 201, 201, 200, 201, 201, 199, 199, 199, 200, 200, 200, 3, 1, 13, 10, 1, 3, 3, 13, 10, 3, 8, 23, 11, 30, 59, 37, 74, 67, 80, 33, 55, 101, 48, 21, 54, 58, 68, 46, 40, 49, 28, 41, 45, 75, 62, 29, 13, 10, 8, 7, 3, 7, 19, 13, 10, 4, 13, 19, 38, 52, 40, 83, 41, 63, 75, 90, 70, 137, 168, 129, 141, 160, 123, 50, 158, 147, 122, 125, 132, 156, 140, 140, 190, 192, 174, 92, 152, 166, 177, 151, 106, 78, 103, 26, 39, 48, 79, 84, 92, 64, 68, 67, 39, 31, 56, 53, 35, 76, 83, 155, 203, 185, 202, 205, 203, 204, 204, 204, 204, 205, 205, 204, 204, 204, 204, 204, 204, 204, 204, 204, 204, 204, 204, 204, 204, 204, 204, 204, 204, 204, 204, 204, 204, 204, 204, 204, 205, 205, 205, 205, 206, 206, 206, 205, 206, 206, 206, 205, 204, 204, 205, 205, 205, 205, 205, 205, 205, 205, 205, 204, 204, 204, 205, 206, 205, 204, 204, 205, 203, 204, 204, 205, 206, 204, 204, 205, 205, 205, 204, 204, 203, 203, 204, 205, 206, 205, 205, 205, 205, 205, 205, 205, 204, 204, 204, 204, 204, 204, 204, 204, 204, 204, 204, 204, 204, 204, 204, 204, 204, 204, 205, 204, 204, 205, 204, 204, 204, 204, 204, 205, 204, 204, 203, 203, 203, 204, 204, 203, 202, 203, 204, 204, 205, 205, 204, 203, 203, 203, 203, 203, 203, 202, 202, 201, 201, 200, 200, 200, 200, 201, 201, 201, 201, 202, 200, 200, 200, 200, 200, 200, 9, 7, 2, 2, 5, 14, 18, 16, 31, 36, 22, 45, 66, 70, 68, 70, 87, 63, 90, 93, 46, 66, 61, 71, 70, 42, 32, 29, 60, 38, 39, 82, 40, 24, 11, 9, 4, 3, 14, 11, 13, 10, 13, 12, 24, 40, 52, 37, 27, 83, 103, 57, 83, 82, 46, 81, 104, 102, 111, 76, 125, 121, 138, 127, 123, 70, 128, 176, 190, 183, 152, 137, 134, 153, 189, 131, 117, 93, 122, 99, 71, 55, 66, 82, 120, 117, 93, 98, 111, 78, 83, 55, 75, 145, 112, 146, 188, 205, 203, 202, 203, 204, 204, 204, 204, 205, 205, 204, 204, 204, 204, 204, 204, 204, 204, 204, 204, 204, 204, 204, 204, 204, 204, 204, 204, 204, 204, 204, 205, 205, 204, 204, 206, 205, 205, 205, 205, 205, 205, 205, 205, 206, 206, 206, 205, 204, 205, 205, 205, 205, 205, 205, 205, 205, 205, 205, 204, 205, 205, 205, 205, 205, 205, 205, 203, 204, 204, 205, 206, 205, 204, 205, 204, 205, 205, 205, 204, 204, 203, 205, 206, 206, 205, 205, 205, 205, 205, 205, 204, 204, 204, 204, 204, 204, 204, 204, 204, 204, 204, 204, 204, 204, 204, 204, 204, 205, 205, 204, 203, 204, 204, 204, 204, 205, 205, 204, 203, 204, 204, 203, 203, 204, 204, 204, 203, 203, 203, 202, 204, 205, 204, 203, 203, 203, 203, 203, 203, 202, 202, 201, 200, 200, 200, 201, 201, 200, 201, 201, 201, 202, 200, 200, 201, 201, 201, 200, 4, 3, 1, 3, 3, 5, 9, 8, 29, 37, 62, 52, 61, 91, 138, 106, 88, 86, 113, 103, 106, 103, 52, 76, 104, 86, 19, 21, 18, 25, 22, 45, 28, 43, 43, 19, 34, 13, 10, 8, 9, 14, 15, 21, 16, 35, 52, 88, 37, 22, 70, 76, 88, 30, 42, 27, 29, 67, 99, 47, 51, 50, 70, 80, 105, 71, 105, 123, 190, 114, 129, 134, 92, 125, 88, 74, 92, 100, 120, 156, 152, 79, 83, 106, 72, 104, 111, 122, 124, 124, 148, 82, 98, 99, 161, 136, 161, 169, 206, 199, 201, 203, 204, 203, 203, 204, 204, 204, 204, 204, 203, 204, 205, 205, 205, 205, 205, 205, 204, 205, 205, 205, 205, 205, 205, 205, 205, 205, 205, 206, 206, 204, 204, 206, 206, 206, 205, 205, 205, 204, 205, 205, 204, 205, 205, 205, 204, 204, 204, 204, 204, 205, 205, 205, 205, 205, 205, 205, 205, 205, 205, 205, 205, 205, 205, 204, 204, 204, 205, 205, 205, 204, 204, 204, 205, 205, 205, 204, 204, 204, 205, 205, 206, 205, 205, 205, 205, 205, 205, 204, 204, 204, 204, 204, 204, 204, 204, 204, 204, 204, 204, 204, 204, 205, 204, 204, 205, 204, 204, 204, 204, 204, 204, 204, 204, 204, 204, 204, 204, 204, 204, 204, 204, 204, 204, 203, 203, 203, 204, 204, 203, 205, 204, 204, 204, 204, 204, 204, 203, 202, 201, 201, 201, 201, 201, 201, 201, 201, 201, 201, 202, 200, 200, 200, 201, 201, 201, 1, 1, 7, 3, 13, 6, 21, 40, 63, 75, 89, 68, 44, 89, 166, 131, 155, 132, 104, 80, 120, 86, 71, 48, 73, 71, 23, 34, 35, 49, 62, 64, 51, 46, 16, 29, 43, 26, 7, 20, 31, 26, 27, 68, 43, 49, 52, 51, 16, 19, 57, 78, 23, 31, 40, 40, 92, 110, 95, 74, 119, 95, 99, 85, 50, 37, 51, 47, 12, 42, 123, 122, 64, 108, 77, 75, 57, 125, 154, 154, 120, 73, 137, 155, 71, 145, 159, 176, 169, 156, 135, 141, 121, 189, 191, 163, 194, 202, 204, 203, 203, 204, 203, 203, 204, 204, 204, 204, 204, 204, 205, 205, 206, 206, 205, 205, 205, 204, 205, 205, 205, 205, 205, 205, 205, 205, 205, 205, 205, 206, 204, 205, 206, 206, 205, 205, 205, 205, 204, 205, 205, 204, 205, 205, 205, 205, 204, 204, 204, 204, 205, 205, 205, 205, 205, 205, 205, 205, 205, 205, 205, 205, 205, 205, 204, 203, 203, 204, 205, 205, 204, 204, 204, 203, 205, 206, 204, 204, 205, 205, 205, 205, 205, 205, 205, 205, 205, 205, 205, 204, 204, 206, 206, 206, 206, 206, 206, 206, 206, 206, 206, 206, 207, 206, 206, 207, 206, 206, 206, 206, 206, 206, 206, 206, 206, 206, 206, 206, 205, 204, 204, 204, 204, 204, 203, 203, 203, 203, 204, 204, 204, 204, 204, 204, 204, 204, 204, 203, 202, 202, 202, 202, 202, 202, 202, 202, 202, 201, 202, 203, 200, 201, 201, 201, 201, 201, 4, 5, 6, 29, 20, 18, 56, 88, 106, 159, 154, 134, 125, 88, 91, 90, 90, 91, 107, 98, 79, 78, 81, 83, 39, 16, 24, 28, 81, 100, 64, 54, 65, 57, 34, 21, 17, 33, 18, 73, 80, 40, 68, 63, 40, 38, 24, 17, 22, 20, 24, 29, 15, 18, 61, 80, 80, 69, 127, 124, 121, 82, 97, 47, 30, 27, 47, 13, 10, 23, 19, 58, 31, 27, 48, 28, 48, 75, 83, 113, 115, 98, 114, 183, 144, 175, 191, 196, 184, 195, 199, 201, 189, 194, 202, 206, 205, 202, 203, 204, 203, 204, 204, 203, 204, 204, 204, 204, 204, 204, 205, 206, 206, 206, 205, 205, 205, 205, 205, 205, 205, 205, 205, 205, 205, 205, 205, 204, 205, 206, 204, 205, 206, 205, 205, 205, 205, 205, 204, 205, 205, 205, 205, 205, 205, 204, 204, 204, 204, 204, 204, 204, 204, 205, 205, 205, 205, 205, 205, 205, 205, 205, 205, 205, 205, 205, 205, 205, 206, 206, 205, 205, 205, 203, 204, 204, 204, 205, 205, 205, 205, 204, 205, 205, 205, 205, 205, 205, 205, 205, 204, 207, 206, 206, 206, 207, 206, 206, 206, 206, 206, 206, 207, 206, 206, 207, 206, 206, 206, 206, 206, 206, 206, 206, 206, 206, 206, 205, 204, 204, 204, 204, 204, 204, 203, 203, 203, 203, 204, 206, 203, 203, 204, 204, 204, 204, 204, 204, 203, 203, 203, 202, 202, 202, 202, 202, 203, 202, 203, 203, 201, 201, 201, 202, 202, 202, 5, 13, 10, 4, 5, 5, 17, 55, 57, 82, 102, 101, 150, 170, 139, 164, 92, 142, 161, 125, 137, 140, 114, 111, 101, 47, 20, 7, 22, 61, 69, 66, 39, 67, 64, 44, 23, 40, 26, 29, 31, 58, 83, 82, 98, 79, 66, 24, 38, 25, 37, 31, 37, 49, 37, 20, 28, 99, 141, 90, 74, 142, 128, 94, 80, 23, 17, 13, 14, 14, 20, 13, 10, 45, 53, 30, 54, 36, 36, 45, 44, 82, 123, 132, 142, 152, 189, 187, 199, 203, 201, 203, 201, 199, 205, 201, 202, 205, 200, 204, 203, 203, 204, 205, 204, 204, 205, 204, 204, 204, 204, 203, 204, 205, 205, 205, 205, 205, 206, 205, 205, 205, 205, 205, 205, 205, 205, 205, 205, 204, 205, 206, 205, 205, 205, 205, 205, 205, 205, 205, 204, 205, 205, 205, 205, 205, 204, 204, 204, 204, 204, 204, 203, 204, 204, 205, 205, 205, 205, 205, 205, 205, 205, 205, 205, 205, 205, 204, 205, 205, 205, 204, 204, 203, 203, 205, 204, 202, 203, 204, 204, 205, 205, 206, 205, 205, 205, 205, 205, 205, 205, 205, 205, 207, 206, 206, 206, 207, 206, 206, 206, 206, 206, 206, 207, 206, 206, 207, 206, 206, 206, 206, 206, 206, 206, 206, 206, 206, 206, 205, 204, 204, 204, 204, 204, 204, 203, 203, 203, 203, 204, 204, 204, 204, 204, 204, 204, 204, 204, 204, 203, 203, 204, 203, 203, 203, 203, 203, 204, 203, 203, 203, 202, 202, 202, 202, 202, 202, 5, 19, 13, 10, 17, 12, 25, 24, 52, 84, 129, 158, 149, 167, 150, 163, 183, 77, 134, 174, 173, 150, 143, 96, 61, 30, 18, 21, 24, 9, 8, 17, 17, 22, 42, 43, 61, 93, 51, 41, 85, 55, 70, 114, 76, 94, 61, 53, 36, 48, 47, 63, 103, 118, 96, 54, 55, 45, 47, 90, 79, 71, 113, 43, 49, 47, 17, 14, 22, 13, 11, 12, 15, 39, 19, 50, 60, 60, 63, 55, 90, 33, 28, 39, 85, 129, 176, 170, 153, 154, 184, 198, 204, 202, 202, 203, 203, 205, 205, 205, 205, 204, 204, 204, 204, 204, 204, 204, 204, 204, 204, 204, 204, 204, 205, 205, 205, 205, 205, 205, 205, 205, 205, 205, 206, 206, 206, 206, 205, 205, 205, 205, 205, 204, 204, 204, 204, 204, 204, 205, 205, 204, 206, 207, 208, 205, 204, 204, 204, 204, 204, 205, 205, 204, 204, 204, 205, 205, 205, 205, 205, 204, 204, 205, 206, 205, 205, 205, 204, 204, 204, 204, 204, 204, 204, 204, 204, 204, 205, 205, 205, 205, 205, 205, 205, 205, 205, 205, 205, 205, 205, 205, 208, 208, 208, 208, 207, 206, 207, 206, 206, 206, 206, 206, 206, 206, 206, 206, 206, 206, 206, 206, 206, 206, 206, 206, 206, 206, 206, 204, 203, 203, 204, 204, 204, 204, 203, 203, 203, 204, 204, 204, 204, 204, 204, 204, 204, 204, 204, 204, 204, 204, 204, 204, 204, 204, 204, 201, 201, 201, 202, 202, 202, 202, 202, 202, 202, 17, 3, 18, 32, 26, 24, 84, 68, 46, 66, 140, 168, 180, 164, 124, 150, 136, 97, 156, 171, 181, 150, 88, 46, 49, 58, 34, 9, 6, 23, 40, 30, 25, 47, 83, 79, 100, 110, 65, 97, 85, 41, 100, 50, 50, 76, 68, 57, 43, 61, 110, 110, 136, 105, 103, 65, 52, 43, 92, 142, 103, 90, 78, 38, 36, 54, 26, 42, 32, 19, 12, 23, 68, 21, 21, 46, 57, 62, 72, 35, 50, 98, 95, 79, 60, 101, 130, 144, 155, 163, 186, 203, 202, 202, 202, 202, 203, 203, 204, 204, 202, 202, 203, 204, 204, 204, 204, 204, 204, 204, 204, 204, 204, 205, 205, 205, 205, 205, 204, 205, 206, 205, 204, 205, 205, 205, 205, 205, 205, 205, 205, 205, 205, 204, 205, 204, 204, 204, 204, 205, 206, 205, 205, 205, 205, 205, 205, 204, 204, 204, 205, 205, 204, 204, 204, 204, 204, 204, 204, 204, 203, 203, 204, 204, 204, 205, 205, 204, 204, 204, 204, 204, 204, 204, 204, 204, 204, 205, 205, 205, 205, 205, 205, 205, 205, 205, 205, 205, 205, 205, 205, 206, 206, 205, 205, 206, 206, 207, 206, 206, 206, 206, 206, 206, 206, 206, 206, 206, 206, 206, 206, 206, 206, 206, 206, 206, 206, 206, 204, 203, 203, 203, 203, 203, 203, 203, 203, 203, 204, 204, 204, 204, 205, 205, 205, 205, 204, 204, 204, 204, 204, 204, 204, 204, 204, 204, 202, 202, 202, 202, 202, 202, 202, 202, 202, 202, 54, 34, 3, 49, 37, 40, 77, 127, 143, 119, 130, 103, 142, 158, 152, 85, 104, 158, 66, 134, 110, 111, 116, 56, 50, 45, 65, 30, 32, 41, 32, 34, 58, 69, 114, 112, 141, 157, 75, 75, 49, 44, 57, 93, 63, 72, 52, 48, 65, 84, 157, 141, 162, 127, 110, 100, 111, 118, 98, 65, 62, 84, 143, 45, 42, 74, 33, 59, 49, 38, 29, 60, 38, 25, 32, 63, 62, 57, 32, 33, 71, 32, 78, 107, 97, 141, 137, 130, 161, 187, 200, 199, 201, 202, 202, 202, 201, 202, 203, 203, 201, 202, 202, 203, 203, 204, 204, 204, 204, 204, 204, 204, 204, 205, 205, 205, 205, 205, 205, 205, 205, 205, 205, 204, 204, 204, 204, 205, 205, 205, 205, 205, 204, 205, 206, 204, 206, 208, 205, 204, 205, 205, 205, 205, 205, 206, 206, 205, 205, 205, 206, 206, 205, 204, 204, 204, 204, 204, 204, 204, 204, 204, 204, 204, 203, 204, 204, 204, 204, 204, 204, 204, 204, 205, 204, 204, 204, 204, 205, 205, 205, 205, 205, 205, 205, 205, 205, 205, 205, 205, 205, 208, 207, 206, 206, 206, 207, 207, 206, 206, 206, 206, 206, 206, 206, 206, 206, 206, 206, 206, 206, 206, 206, 206, 206, 206, 206, 206, 204, 203, 203, 203, 203, 203, 203, 203, 203, 203, 204, 204, 204, 204, 204, 204, 204, 204, 204, 204, 204, 204, 204, 204, 204, 204, 204, 204, 203, 203, 203, 202, 202, 202, 202, 202, 202, 202, 61, 23, 9, 5, 20, 76, 105, 107, 124, 132, 139, 158, 117, 80, 47, 107, 103, 81, 38, 38, 117, 151, 159, 103, 105, 40, 93, 83, 40, 66, 51, 45, 28, 89, 76, 121, 147, 92, 126, 58, 63, 72, 59, 70, 64, 24, 20, 86, 115, 92, 178, 168, 173, 124, 108, 163, 136, 175, 114, 97, 68, 97, 123, 59, 125, 81, 46, 63, 52, 94, 64, 47, 34, 77, 75, 66, 66, 48, 57, 74, 55, 82, 61, 162, 136, 147, 175, 166, 193, 197, 199, 201, 201, 202, 201, 200, 201, 203, 203, 202, 201, 201, 202, 202, 202, 203, 203, 204, 204, 204, 204, 204, 205, 206, 205, 205, 205, 205, 207, 205, 205, 205, 205, 205, 205, 205, 206, 206, 206, 205, 205, 205, 205, 202, 206, 167, 194, 207, 198, 208, 202, 204, 209, 204, 207, 206, 205, 205, 205, 205, 205, 205, 205, 204, 203, 203, 204, 204, 203, 204, 204, 204, 204, 204, 204, 204, 204, 204, 204, 204, 204, 204, 204, 203, 204, 204, 204, 204, 205, 206, 205, 204, 204, 204, 204, 204, 204, 205, 205, 205, 204, 205, 207, 207, 206, 206, 207, 206, 206, 206, 206, 206, 206, 206, 206, 205, 205, 205, 206, 206, 206, 206, 206, 206, 206, 206, 206, 206, 204, 203, 203, 203, 203, 204, 203, 202, 203, 203, 203, 204, 204, 203, 203, 203, 204, 204, 205, 204, 204, 204, 204, 203, 204, 204, 204, 203, 204, 204, 203, 202, 202, 202, 202, 201, 201, 201, 7, 17, 24, 27, 13, 21, 59, 98, 125, 111, 70, 76, 90, 67, 31, 73, 42, 8, 46, 22, 30, 34, 47, 40, 34, 29, 39, 57, 58, 39, 72, 104, 44, 44, 54, 84, 75, 70, 72, 31, 71, 76, 81, 75, 28, 23, 41, 59, 36, 69, 148, 147, 156, 111, 155, 142, 151, 142, 127, 111, 111, 139, 98, 73, 165, 94, 40, 83, 63, 59, 55, 45, 55, 118, 68, 102, 62, 79, 100, 123, 94, 130, 85, 96, 163, 162, 153, 179, 196, 202, 201, 200, 200, 200, 200, 201, 201, 201, 202, 202, 203, 203, 204, 206, 206, 206, 206, 207, 207, 204, 204, 205, 205, 205, 205, 205, 205, 205, 205, 205, 205, 205, 206, 205, 205, 205, 205, 205, 206, 206, 206, 205, 207, 204, 204, 124, 159, 201, 199, 197, 199, 198, 200, 206, 207, 207, 204, 204, 204, 204, 204, 205, 206, 206, 205, 207, 208, 207, 205, 206, 206, 206, 206, 206, 206, 206, 206, 206, 206, 206, 206, 206, 206, 204, 204, 204, 203, 203, 204, 204, 204, 204, 206, 206, 206, 206, 206, 206, 206, 206, 206, 205, 207, 207, 206, 206, 206, 206, 206, 207, 206, 206, 206, 206, 206, 205, 205, 206, 206, 206, 206, 206, 206, 206, 206, 206, 206, 206, 205, 205, 205, 205, 205, 205, 204, 204, 204, 204, 204, 205, 204, 204, 204, 204, 204, 204, 204, 204, 204, 204, 205, 205, 206, 206, 206, 205, 203, 203, 203, 204, 204, 204, 204, 203, 203, 203, 33, 7, 32, 26, 60, 49, 37, 33, 84, 115, 112, 68, 55, 19, 23, 54, 31, 29, 23, 22, 7, 45, 77, 108, 120, 76, 47, 80, 93, 40, 97, 112, 110, 38, 40, 18, 25, 31, 20, 18, 61, 59, 77, 15, 16, 16, 16, 21, 44, 64, 34, 60, 143, 147, 122, 101, 105, 71, 59, 37, 34, 42, 62, 81, 43, 46, 53, 45, 99, 69, 55, 65, 91, 96, 92, 56, 78, 97, 121, 111, 135, 159, 124, 111, 139, 174, 199, 176, 156, 194, 200, 202, 201, 200, 200, 201, 202, 203, 203, 204, 203, 204, 205, 206, 206, 206, 206, 207, 207, 204, 205, 205, 205, 204, 205, 205, 205, 205, 205, 205, 205, 205, 204, 205, 205, 205, 205, 205, 205, 206, 206, 206, 208, 204, 204, 196, 95, 101, 161, 191, 196, 173, 204, 203, 209, 206, 206, 206, 206, 206, 205, 204, 204, 204, 205, 206, 207, 206, 205, 206, 206, 206, 206, 206, 206, 206, 206, 206, 206, 206, 206, 206, 206, 203, 203, 204, 204, 204, 204, 203, 204, 204, 206, 206, 206, 206, 206, 207, 207, 207, 207, 205, 207, 207, 206, 206, 206, 206, 206, 207, 206, 206, 206, 206, 206, 206, 205, 205, 205, 206, 206, 206, 206, 206, 206, 206, 206, 206, 205, 205, 205, 205, 205, 205, 204, 204, 204, 204, 204, 205, 204, 204, 204, 204, 204, 204, 204, 204, 204, 204, 205, 206, 206, 206, 206, 206, 204, 204, 203, 203, 203, 204, 204, 202, 203, 202, 34, 38, 76, 89, 69, 52, 96, 68, 49, 31, 17, 38, 49, 23, 68, 60, 31, 38, 16, 20, 45, 48, 47, 103, 92, 107, 80, 105, 101, 89, 54, 60, 44, 44, 17, 16, 14, 20, 29, 20, 23, 36, 25, 44, 40, 23, 19, 31, 45, 41, 31, 24, 15, 69, 107, 70, 54, 30, 29, 28, 49, 63, 77, 32, 87, 49, 50, 78, 81, 75, 64, 102, 165, 177, 144, 134, 176, 167, 179, 126, 163, 184, 157, 170, 162, 190, 200, 204, 204, 203, 204, 203, 202, 201, 202, 202, 201, 203, 203, 203, 204, 204, 204, 205, 205, 205, 205, 206, 206, 204, 205, 206, 205, 203, 205, 205, 205, 205, 204, 204, 205, 205, 205, 203, 204, 205, 206, 206, 206, 206, 205, 206, 205, 208, 206, 203, 203, 134, 62, 92, 111, 113, 191, 206, 204, 210, 205, 205, 205, 205, 207, 206, 205, 205, 205, 207, 207, 207, 207, 206, 206, 206, 206, 206, 206, 206, 206, 206, 206, 206, 206, 206, 206, 204, 204, 204, 203, 203, 204, 203, 203, 204, 206, 206, 206, 206, 205, 205, 206, 206, 206, 205, 207, 207, 206, 206, 207, 206, 206, 206, 206, 206, 206, 206, 206, 207, 207, 206, 206, 206, 206, 206, 206, 206, 206, 206, 206, 206, 206, 205, 205, 205, 205, 205, 205, 204, 205, 204, 203, 204, 204, 203, 203, 204, 204, 205, 205, 205, 204, 204, 205, 205, 205, 206, 205, 205, 203, 204, 205, 204, 204, 204, 204, 203, 204, 203, 20, 27, 27, 68, 82, 34, 72, 44, 42, 36, 27, 33, 62, 30, 24, 16, 47, 78, 47, 38, 97, 67, 82, 72, 66, 59, 49, 78, 74, 68, 41, 44, 39, 44, 43, 30, 54, 43, 49, 79, 50, 71, 38, 96, 69, 43, 43, 46, 31, 36, 20, 51, 47, 25, 33, 40, 38, 34, 49, 53, 87, 76, 56, 39, 26, 27, 42, 46, 72, 52, 74, 121, 121, 140, 166, 186, 194, 196, 199, 178, 171, 193, 182, 182, 186, 186, 198, 202, 204, 205, 204, 203, 203, 203, 204, 204, 203, 204, 204, 203, 203, 204, 205, 205, 205, 206, 203, 203, 204, 205, 205, 205, 205, 205, 205, 205, 205, 205, 206, 205, 204, 204, 205, 205, 206, 206, 206, 209, 209, 205, 202, 203, 206, 207, 206, 203, 201, 195, 127, 135, 139, 163, 210, 202, 205, 201, 205, 205, 205, 205, 206, 206, 206, 206, 206, 205, 205, 205, 207, 207, 206, 205, 206, 206, 206, 206, 206, 207, 206, 205, 204, 204, 204, 204, 204, 204, 204, 204, 206, 206, 206, 206, 206, 206, 206, 206, 206, 206, 206, 206, 206, 206, 206, 206, 206, 206, 207, 207, 207, 206, 206, 206, 206, 206, 206, 206, 206, 206, 207, 206, 206, 206, 205, 205, 206, 206, 205, 206, 206, 206, 206, 206, 206, 205, 205, 205, 205, 204, 204, 205, 205, 203, 204, 204, 204, 205, 205, 205, 205, 205, 205, 205, 205, 206, 207, 205, 203, 203, 204, 204, 204, 204, 203, 203, 203, 203, 15, 26, 102, 39, 36, 44, 75, 35, 54, 88, 39, 17, 33, 43, 2, 26, 28, 59, 40, 13, 52, 63, 65, 100, 61, 48, 50, 6, 31, 42, 16, 23, 22, 12, 12, 54, 65, 63, 72, 66, 93, 40, 53, 65, 108, 107, 58, 52, 35, 22, 22, 36, 50, 75, 46, 33, 9, 56, 80, 96, 76, 95, 66, 42, 14, 34, 40, 36, 51, 111, 109, 108, 168, 143, 139, 191, 182, 198, 200, 202, 202, 201, 199, 202, 203, 201, 203, 204, 204, 205, 204, 204, 203, 203, 204, 204, 205, 205, 205, 205, 206, 205, 205, 205, 205, 206, 204, 204, 205, 205, 205, 205, 205, 205, 205, 205, 205, 205, 204, 204, 204, 205, 205, 205, 206, 206, 206, 206, 206, 205, 205, 205, 207, 206, 207, 200, 172, 104, 106, 92, 100, 159, 201, 209, 206, 206, 205, 205, 205, 205, 206, 206, 205, 205, 205, 205, 205, 205, 207, 207, 206, 206, 207, 206, 206, 206, 206, 206, 206, 205, 204, 204, 204, 204, 204, 204, 205, 205, 206, 206, 206, 206, 206, 206, 206, 206, 206, 206, 205, 206, 206, 206, 206, 206, 206, 206, 206, 206, 206, 205, 205, 205, 206, 206, 206, 206, 206, 206, 207, 206, 206, 206, 206, 206, 205, 206, 206, 206, 206, 206, 206, 206, 206, 206, 205, 205, 205, 205, 205, 205, 205, 205, 205, 205, 205, 205, 206, 205, 205, 205, 206, 205, 205, 205, 206, 205, 204, 204, 204, 204, 204, 204, 203, 203, 202, 203, 25, 11, 53, 79, 17, 47, 51, 82, 42, 48, 51, 39, 20, 26, 45, 18, 18, 41, 72, 65, 89, 97, 140, 63, 106, 121, 67, 20, 56, 44, 21, 9, 17, 52, 34, 33, 25, 18, 34, 48, 43, 44, 24, 42, 56, 34, 27, 22, 13, 10, 27, 39, 44, 69, 103, 75, 35, 19, 57, 66, 81, 63, 59, 44, 21, 21, 32, 59, 88, 68, 93, 121, 126, 165, 197, 193, 152, 195, 205, 205, 203, 205, 204, 202, 203, 205, 204, 204, 204, 204, 206, 205, 204, 204, 204, 204, 205, 206, 206, 206, 206, 206, 205, 205, 206, 207, 206, 205, 205, 205, 205, 205, 205, 205, 205, 205, 205, 205, 205, 204, 204, 205, 205, 205, 205, 206, 206, 206, 205, 205, 205, 205, 207, 207, 209, 199, 195, 115, 57, 25, 34, 44, 88, 198, 206, 207, 208, 205, 205, 205, 205, 206, 206, 206, 205, 205, 206, 206, 206, 208, 207, 206, 206, 207, 207, 207, 206, 206, 206, 206, 205, 204, 204, 204, 204, 204, 204, 204, 204, 206, 206, 206, 206, 206, 206, 206, 206, 206, 206, 206, 206, 206, 206, 206, 206, 206, 206, 206, 207, 206, 206, 205, 206, 206, 206, 206, 206, 206, 206, 206, 206, 206, 206, 206, 206, 207, 208, 206, 205, 205, 206, 206, 206, 206, 206, 206, 205, 205, 204, 204, 204, 204, 205, 205, 205, 205, 205, 205, 205, 205, 206, 206, 206, 205, 205, 206, 206, 204, 204, 204, 204, 204, 203, 203, 202, 202, 201, 27, 20, 23, 25, 31, 49, 37, 52, 58, 32, 52, 33, 17, 18, 21, 18, 11, 11, 57, 72, 119, 98, 90, 151, 108, 124, 68, 48, 34, 50, 90, 23, 14, 15, 40, 45, 31, 42, 50, 74, 77, 114, 50, 63, 75, 36, 25, 14, 22, 37, 62, 94, 70, 123, 133, 77, 68, 76, 121, 100, 96, 74, 32, 33, 20, 65, 105, 89, 117, 120, 133, 113, 182, 203, 205, 200, 199, 206, 205, 205, 205, 205, 205, 205, 206, 205, 205, 206, 206, 204, 205, 206, 204, 204, 205, 205, 206, 206, 206, 206, 206, 206, 206, 206, 206, 206, 204, 205, 205, 204, 205, 205, 205, 205, 205, 205, 205, 205, 205, 205, 205, 205, 205, 205, 205, 206, 206, 205, 205, 204, 205, 207, 208, 207, 198, 192, 83, 25, 18, 27, 33, 56, 182, 205, 205, 207, 204, 205, 205, 205, 206, 206, 206, 205, 205, 206, 205, 206, 208, 208, 208, 208, 207, 207, 207, 206, 206, 206, 206, 205, 204, 204, 204, 204, 205, 205, 204, 204, 206, 206, 206, 206, 206, 206, 206, 207, 206, 206, 207, 206, 206, 206, 206, 206, 206, 206, 206, 206, 206, 206, 206, 206, 206, 206, 206, 206, 206, 206, 206, 206, 206, 206, 206, 206, 206, 205, 205, 205, 205, 206, 206, 206, 206, 206, 206, 205, 205, 205, 204, 204, 204, 204, 204, 206, 204, 203, 206, 206, 206, 206, 206, 206, 205, 205, 206, 205, 204, 204, 204, 203, 203, 203, 202, 202, 202, 201, 13, 10, 13, 10, 7, 6, 13, 9, 3, 16, 19, 19, 17, 9, 20, 16, 15, 29, 14, 30, 79, 73, 73, 119, 114, 116, 169, 107, 82, 47, 40, 44, 97, 22, 23, 18, 23, 36, 39, 48, 72, 100, 137, 103, 105, 123, 65, 70, 19, 15, 13, 10, 32, 19, 15, 26, 40, 61, 74, 142, 99, 113, 136, 166, 99, 43, 51, 30, 62, 61, 100, 108, 129, 170, 166, 184, 201, 204, 204, 205, 204, 205, 205, 205, 205, 205, 205, 205, 206, 205, 206, 206, 205, 205, 205, 204, 204, 205, 205, 205, 206, 206, 205, 206, 206, 206, 206, 206, 206, 204, 205, 205, 206, 205, 204, 205, 206, 205, 205, 205, 205, 205, 205, 205, 205, 205, 205, 205, 206, 206, 206, 205, 203, 204, 206, 206, 200, 204, 200, 124, 76, 78, 71, 84, 98, 181, 199, 204, 208, 205, 205, 205, 206, 206, 206, 206, 205, 205, 206, 206, 206, 208, 208, 208, 208, 207, 206, 207, 207, 206, 206, 206, 205, 204, 204, 204, 204, 204, 205, 204, 204, 206, 206, 206, 206, 206, 206, 206, 207, 206, 206, 207, 206, 206, 206, 206, 206, 206, 206, 206, 206, 206, 206, 206, 206, 206, 206, 206, 206, 206, 206, 206, 206, 206, 206, 206, 206, 205, 205, 205, 205, 206, 206, 206, 206, 206, 206, 206, 206, 205, 205, 205, 205, 205, 205, 205, 205, 204, 204, 206, 206, 206, 206, 206, 206, 205, 205, 206, 206, 204, 204, 204, 203, 203, 203, 202, 202, 202, 201, 9, 17, 6, 8, 13, 11, 9, 15, 30, 16, 24, 19, 13, 10, 7, 19, 21, 17, 32, 62, 119, 126, 72, 123, 111, 104, 98, 41, 67, 56, 48, 48, 34, 36, 39, 19, 22, 27, 62, 68, 113, 144, 131, 131, 105, 70, 67, 79, 65, 33, 42, 39, 59, 34, 27, 24, 57, 119, 117, 139, 168, 199, 109, 124, 92, 52, 93, 130, 108, 78, 116, 169, 169, 200, 206, 205, 205, 208, 206, 206, 206, 206, 206, 206, 206, 205, 206, 206, 206, 206, 205, 206, 206, 204, 204, 205, 205, 205, 206, 206, 206, 206, 206, 206, 206, 206, 206, 204, 205, 205, 206, 205, 205, 205, 205, 205, 205, 205, 205, 205, 205, 205, 205, 205, 205, 205, 206, 206, 208, 209, 205, 203, 202, 205, 212, 206, 142, 36, 14, 28, 43, 40, 31, 62, 150, 208, 209, 205, 206, 206, 206, 206, 206, 207, 207, 208, 207, 206, 206, 208, 207, 208, 208, 208, 208, 207, 207, 207, 206, 206, 205, 204, 204, 204, 204, 204, 204, 204, 204, 206, 206, 206, 206, 206, 206, 206, 206, 206, 206, 207, 206, 206, 206, 206, 206, 206, 206, 206, 206, 206, 206, 206, 206, 206, 206, 206, 206, 206, 206, 206, 206, 206, 206, 206, 206, 204, 206, 204, 204, 206, 206, 206, 206, 206, 206, 206, 206, 206, 206, 206, 206, 206, 206, 206, 206, 206, 206, 207, 206, 206, 206, 206, 206, 205, 206, 207, 206, 204, 204, 204, 203, 203, 203, 202, 202, 202, 202, 19, 13, 10, 7, 6, 6, 8, 13, 23, 21, 15, 16, 18, 16, 7, 15, 38, 38, 56, 66, 130, 160, 169, 130, 128, 133, 120, 47, 71, 129, 87, 36, 85, 90, 36, 29, 52, 50, 38, 47, 98, 145, 170, 157, 140, 126, 72, 64, 74, 89, 84, 41, 50, 35, 65, 49, 55, 62, 97, 145, 138, 155, 120, 177, 116, 113, 120, 180, 163, 146, 130, 154, 177, 205, 205, 206, 205, 206, 206, 206, 206, 206, 206, 207, 206, 205, 206, 206, 206, 206, 205, 206, 206, 204, 204, 205, 204, 204, 205, 206, 206, 206, 206, 206, 206, 206, 206, 205, 205, 205, 205, 206, 206, 206, 204, 205, 205, 204, 205, 205, 205, 205, 205, 205, 205, 205, 206, 206, 206, 206, 205, 203, 203, 204, 203, 151, 36, 43, 72, 92, 94, 99, 87, 40, 50, 192, 205, 207, 206, 205, 204, 204, 204, 205, 205, 206, 208, 207, 207, 207, 208, 208, 208, 208, 208, 207, 207, 207, 206, 206, 206, 205, 205, 205, 205, 205, 205, 205, 205, 206, 206, 206, 206, 206, 206, 206, 206, 206, 206, 206, 206, 207, 205, 206, 206, 206, 206, 206, 206, 206, 206, 206, 206, 206, 206, 206, 206, 206, 206, 206, 206, 206, 206, 206, 205, 206, 206, 205, 205, 205, 205, 205, 206, 206, 206, 206, 206, 205, 206, 205, 205, 205, 205, 205, 205, 205, 206, 206, 206, 206, 206, 206, 206, 206, 206, 207, 206, 205, 205, 205, 204, 203, 203, 202, 202, 202, 202, 23, 14, 13, 10, 11, 33, 17, 13, 10, 15, 16, 13, 10, 8, 12, 11, 13, 13, 20, 60, 68, 69, 125, 119, 125, 146, 91, 91, 82, 76, 81, 111, 106, 36, 62, 93, 34, 16, 41, 61, 95, 112, 97, 84, 132, 159, 177, 128, 153, 95, 73, 137, 104, 98, 73, 37, 74, 112, 70, 115, 102, 121, 159, 131, 158, 173, 145, 137, 149, 172, 197, 174, 188, 175, 201, 204, 205, 204, 206, 206, 206, 206, 206, 206, 206, 207, 207, 206, 206, 206, 206, 206, 206, 206, 206, 205, 205, 205, 204, 205, 205, 206, 206, 206, 206, 205, 205, 205, 206, 206, 206, 206, 206, 206, 207, 207, 205, 205, 206, 205, 205, 206, 206, 206, 206, 206, 205, 206, 206, 205, 203, 202, 205, 206, 207, 207, 205, 85, 36, 80, 89, 95, 94, 95, 107, 101, 39, 160, 207, 209, 208, 206, 205, 204, 204, 205, 205, 206, 208, 208, 208, 209, 208, 208, 208, 208, 208, 208, 207, 207, 207, 207, 206, 206, 206, 206, 206, 206, 206, 206, 206, 206, 206, 206, 206, 206, 206, 206, 206, 206, 206, 206, 206, 205, 204, 205, 206, 207, 207, 205, 203, 203, 204, 206, 206, 206, 206, 206, 206, 206, 206, 206, 206, 206, 206, 206, 206, 206, 206, 206, 206, 205, 205, 206, 206, 206, 206, 205, 207, 205, 205, 206, 206, 206, 206, 205, 205, 206, 206, 206, 206, 206, 206, 206, 206, 206, 206, 206, 207, 206, 206, 205, 205, 203, 202, 202, 202, 202, 202, 39, 39, 28, 11, 14, 21, 13, 11, 12, 18, 24, 24, 11, 9, 9, 19, 42, 53, 86, 89, 75, 67, 90, 112, 63, 64, 57, 80, 113, 89, 25, 22, 139, 125, 56, 88, 81, 94, 98, 118, 126, 128, 152, 164, 181, 161, 145, 87, 133, 131, 107, 108, 108, 73, 104, 115, 75, 124, 138, 145, 161, 181, 171, 173, 198, 174, 151, 207, 200, 181, 201, 204, 206, 205, 203, 206, 206, 206, 206, 206, 206, 206, 206, 206, 206, 206, 206, 206, 206, 205, 206, 205, 205, 206, 206, 205, 206, 206, 206, 206, 206, 206, 206, 206, 207, 206, 206, 207, 207, 207, 206, 206, 207, 206, 205, 206, 204, 205, 205, 205, 206, 206, 206, 206, 206, 206, 205, 204, 204, 206, 206, 208, 204, 202, 112, 52, 94, 99, 103, 111, 116, 112, 116, 48, 170, 209, 211, 210, 208, 206, 206, 205, 206, 206, 206, 208, 208, 209, 210, 208, 208, 208, 208, 208, 208, 208, 208, 208, 207, 206, 206, 206, 206, 206, 206, 206, 206, 206, 206, 206, 206, 206, 206, 206, 206, 206, 206, 207, 205, 204, 205, 206, 206, 206, 206, 205, 204, 205, 205, 206, 206, 206, 206, 206, 206, 206, 206, 206, 206, 206, 206, 205, 206, 207, 206, 206, 206, 206, 206, 206, 206, 206, 206, 206, 205, 206, 205, 205, 206, 206, 206, 206, 206, 206, 206, 206, 206, 206, 206, 206, 206, 206, 206, 206, 206, 207, 206, 206, 205, 205, 202, 202, 202, 202, 202, 202, 27, 44, 8, 5, 13, 10, 32, 58, 12, 11, 18, 21, 34, 54, 26, 15, 14, 53, 62, 71, 98, 113, 123, 106, 114, 81, 36, 42, 81, 85, 73, 41, 72, 74, 96, 79, 68, 127, 126, 127, 114, 148, 170, 174, 180, 199, 165, 180, 122, 98, 166, 131, 108, 132, 139, 122, 123, 95, 136, 179, 191, 192, 196, 173, 191, 206, 197, 175, 196, 203, 202, 204, 202, 205, 205, 206, 206, 206, 206, 206, 206, 206, 206, 206, 206, 206, 206, 206, 206, 206, 205, 205, 205, 205, 207, 207, 206, 207, 206, 206, 206, 206, 206, 205, 205, 205, 206, 207, 207, 208, 208, 207, 206, 207, 207, 204, 206, 205, 204, 204, 204, 204, 205, 205, 206, 205, 205, 206, 207, 207, 206, 205, 205, 206, 203, 170, 82, 92, 93, 96, 109, 117, 108, 113, 101, 203, 204, 210, 209, 208, 207, 208, 206, 206, 206, 206, 209, 209, 209, 209, 208, 208, 208, 208, 208, 208, 207, 207, 207, 207, 206, 206, 206, 206, 206, 206, 206, 206, 206, 206, 206, 206, 206, 206, 206, 206, 206, 206, 206, 206, 206, 206, 205, 206, 206, 206, 206, 206, 205, 206, 207, 206, 206, 206, 206, 206, 207, 207, 207, 207, 205, 205, 206, 206, 206, 206, 206, 206, 206, 206, 206, 206, 206, 206, 205, 206, 203, 204, 207, 206, 206, 206, 206, 206, 206, 206, 206, 206, 206, 206, 206, 206, 206, 206, 206, 206, 207, 206, 206, 206, 205, 202, 202, 202, 201, 201, 202, 68, 32, 24, 12, 12, 11, 47, 19, 11, 12, 20, 52, 103, 50, 67, 45, 41, 25, 67, 79, 67, 104, 132, 126, 95, 32, 44, 117, 154, 108, 78, 62, 91, 113, 116, 137, 120, 134, 162, 176, 135, 136, 149, 166, 186, 187, 152, 176, 128, 150, 172, 166, 133, 157, 152, 178, 122, 151, 196, 205, 202, 205, 197, 201, 202, 205, 203, 201, 205, 205, 205, 205, 205, 204, 205, 206, 206, 206, 206, 206, 206, 206, 207, 206, 206, 205, 205, 205, 205, 206, 206, 206, 206, 206, 206, 206, 206, 206, 206, 206, 206, 206, 206, 206, 206, 207, 207, 207, 207, 207, 207, 207, 207, 205, 206, 206, 205, 204, 205, 205, 205, 206, 206, 205, 205, 204, 204, 203, 204, 206, 200, 202, 206, 204, 190, 171, 103, 109, 118, 117, 124, 124, 117, 128, 164, 181, 204, 210, 203, 206, 200, 208, 207, 204, 208, 208, 208, 208, 208, 208, 208, 208, 208, 208, 208, 206, 206, 207, 208, 207, 206, 206, 206, 206, 206, 206, 206, 206, 206, 206, 206, 206, 206, 206, 206, 206, 206, 206, 206, 206, 206, 206, 206, 206, 206, 206, 206, 206, 206, 206, 206, 206, 206, 206, 206, 206, 206, 206, 206, 206, 206, 206, 206, 206, 206, 206, 205, 205, 205, 205, 206, 206, 207, 206, 206, 206, 206, 206, 206, 206, 206, 206, 206, 206, 206, 206, 206, 206, 206, 206, 206, 206, 206, 206, 206, 206, 204, 204, 204, 206, 204, 205, 203, 201, 202, 201, 39, 51, 98, 26, 26, 30, 26, 41, 25, 17, 27, 70, 146, 78, 35, 121, 80, 53, 80, 120, 128, 99, 99, 80, 93, 92, 77, 112, 167, 133, 137, 104, 115, 112, 88, 134, 157, 138, 138, 175, 190, 187, 173, 162, 191, 193, 130, 172, 158, 147, 178, 188, 144, 156, 171, 180, 167, 187, 201, 202, 202, 201, 203, 201, 203, 205, 204, 203, 206, 205, 205, 205, 205, 205, 205, 206, 206, 206, 206, 206, 206, 206, 207, 206, 206, 205, 205, 205, 206, 206, 206, 206, 206, 206, 206, 206, 206, 206, 206, 206, 206, 206, 206, 206, 206, 208, 208, 207, 207, 207, 207, 207, 207, 205, 205, 205, 205, 204, 205, 205, 206, 206, 206, 206, 206, 205, 205, 203, 203, 200, 203, 202, 176, 151, 119, 111, 115, 123, 131, 123, 130, 129, 113, 106, 104, 116, 118, 120, 147, 181, 208, 204, 204, 206, 206, 208, 208, 208, 208, 209, 208, 208, 207, 207, 208, 206, 206, 207, 207, 206, 206, 206, 206, 206, 206, 206, 206, 206, 206, 206, 206, 206, 206, 206, 206, 206, 206, 207, 206, 206, 206, 206, 206, 206, 206, 206, 206, 206, 206, 206, 206, 206, 206, 206, 206, 206, 206, 206, 206, 206, 206, 206, 206, 206, 205, 205, 206, 206, 206, 207, 206, 206, 206, 206, 206, 206, 206, 206, 206, 206, 206, 206, 206, 206, 206, 206, 206, 206, 206, 206, 206, 206, 206, 206, 206, 206, 206, 205, 205, 205, 204, 204, 205, 204, 203, 202, 34, 21, 54, 34, 47, 36, 102, 56, 32, 34, 24, 75, 139, 58, 54, 109, 101, 103, 150, 102, 88, 136, 130, 153, 112, 146, 138, 96, 121, 130, 113, 109, 104, 138, 131, 94, 160, 168, 154, 160, 183, 193, 192, 199, 202, 195, 146, 140, 159, 164, 169, 181, 196, 146, 142, 143, 148, 171, 189, 203, 203, 204, 203, 202, 203, 204, 203, 204, 204, 204, 204, 205, 205, 204, 205, 206, 206, 206, 206, 206, 206, 206, 206, 206, 206, 206, 206, 206, 206, 206, 206, 206, 206, 206, 206, 206, 206, 206, 206, 206, 207, 207, 206, 206, 206, 207, 207, 206, 206, 206, 206, 206, 206, 204, 204, 204, 204, 204, 206, 206, 206, 206, 206, 207, 206, 206, 205, 202, 206, 192, 152, 131, 126, 126, 117, 111, 119, 123, 122, 121, 124, 119, 107, 108, 105, 108, 110, 107, 121, 132, 137, 165, 196, 206, 204, 207, 207, 207, 207, 207, 208, 208, 208, 208, 208, 206, 206, 207, 207, 207, 206, 206, 207, 206, 206, 206, 206, 206, 206, 206, 206, 206, 206, 206, 206, 206, 206, 206, 206, 206, 206, 206, 206, 206, 206, 206, 206, 206, 206, 206, 206, 206, 206, 206, 206, 206, 206, 206, 206, 206, 206, 206, 206, 206, 206, 206, 206, 206, 207, 207, 207, 206, 206, 206, 206, 206, 206, 206, 206, 206, 206, 206, 206, 206, 206, 206, 206, 206, 206, 206, 206, 206, 206, 206, 206, 206, 206, 206, 206, 206, 204, 203, 203, 204, 203, 204, 23, 29, 44, 79, 72, 118, 90, 93, 52, 20, 24, 109, 70, 33, 72, 94, 166, 100, 100, 86, 88, 144, 142, 110, 122, 158, 134, 111, 54, 101, 136, 138, 139, 163, 151, 111, 128, 179, 183, 172, 179, 187, 194, 176, 183, 181, 135, 140, 179, 150, 171, 171, 146, 120, 100, 157, 180, 180, 177, 192, 200, 202, 202, 204, 203, 204, 203, 204, 204, 204, 204, 205, 205, 205, 205, 206, 206, 206, 206, 206, 206, 206, 206, 206, 206, 206, 206, 206, 206, 206, 206, 206, 206, 206, 206, 206, 206, 206, 206, 206, 207, 207, 206, 206, 206, 206, 206, 206, 206, 206, 206, 206, 206, 207, 206, 206, 206, 206, 207, 207, 207, 209, 209, 210, 203, 207, 198, 198, 133, 118, 116, 120, 118, 114, 106, 111, 114, 122, 112, 116, 115, 125, 124, 111, 106, 108, 111, 113, 122, 129, 140, 143, 143, 167, 200, 203, 203, 205, 208, 207, 208, 207, 206, 205, 207, 207, 207, 206, 207, 207, 208, 208, 206, 206, 206, 207, 206, 206, 206, 206, 206, 206, 206, 206, 206, 206, 206, 206, 206, 206, 207, 208, 208, 207, 207, 207, 207, 207, 207, 206, 206, 206, 206, 206, 206, 206, 206, 206, 206, 206, 205, 206, 206, 205, 206, 206, 206, 207, 206, 207, 207, 206, 206, 206, 206, 206, 206, 206, 206, 206, 207, 205, 206, 206, 206, 206, 206, 206, 206, 206, 206, 206, 206, 206, 206, 206, 204, 204, 205, 204, 206, 203, 203, 204, 204, 204, 24, 38, 43, 107, 95, 150, 132, 66, 79, 32, 22, 40, 41, 58, 67, 109, 140, 162, 77, 70, 89, 85, 103, 76, 112, 93, 79, 78, 123, 100, 124, 192, 181, 178, 181, 165, 140, 151, 180, 184, 169, 168, 168, 179, 190, 166, 138, 144, 148, 149, 126, 115, 126, 156, 178, 185, 184, 185, 186, 193, 201, 204, 203, 204, 204, 204, 204, 204, 204, 205, 205, 205, 205, 205, 205, 206, 206, 206, 206, 206, 206, 206, 206, 206, 206, 206, 206, 206, 206, 206, 206, 206, 206, 206, 206, 206, 206, 206, 206, 206, 207, 207, 206, 206, 206, 206, 206, 206, 206, 205, 206, 206, 207, 207, 206, 206, 206, 206, 207, 208, 207, 207, 206, 204, 204, 200, 155, 117, 117, 118, 117, 116, 123, 125, 123, 109, 107, 109, 100, 104, 109, 119, 108, 109, 108, 102, 112, 116, 116, 122, 132, 137, 144, 144, 152, 182, 203, 204, 207, 206, 206, 206, 205, 204, 207, 207, 208, 207, 207, 207, 207, 208, 206, 206, 207, 207, 206, 206, 206, 206, 206, 206, 206, 206, 206, 206, 206, 206, 206, 206, 207, 207, 207, 207, 207, 207, 207, 207, 207, 206, 206, 206, 206, 206, 206, 206, 206, 206, 206, 207, 206, 206, 207, 206, 206, 206, 206, 206, 206, 207, 207, 206, 206, 206, 206, 206, 206, 206, 207, 206, 207, 206, 206, 206, 206, 206, 206, 206, 206, 206, 206, 206, 206, 206, 206, 206, 204, 204, 204, 204, 205, 203, 203, 204, 204, 204, 30, 97, 109, 100, 117, 102, 166, 86, 45, 17, 20, 31, 41, 29, 30, 61, 96, 98, 52, 20, 32, 60, 46, 80, 85, 111, 129, 120, 168, 172, 126, 123, 181, 194, 192, 184, 184, 148, 171, 175, 145, 158, 174, 189, 188, 121, 86, 84, 97, 78, 86, 115, 144, 166, 180, 187, 196, 196, 198, 199, 203, 204, 203, 203, 204, 205, 204, 205, 205, 205, 205, 205, 205, 205, 205, 206, 206, 206, 206, 206, 206, 206, 206, 206, 206, 206, 206, 206, 206, 206, 206, 206, 206, 206, 206, 206, 206, 206, 206, 206, 206, 206, 206, 206, 206, 206, 206, 206, 206, 206, 206, 206, 205, 205, 206, 206, 206, 206, 206, 206, 206, 205, 204, 203, 190, 131, 104, 110, 118, 117, 120, 107, 103, 102, 68, 64, 55, 24, 35, 19, 13, 10, 16, 11, 15, 14, 12, 28, 30, 34, 71, 92, 109, 132, 139, 131, 139, 165, 197, 201, 205, 206, 205, 206, 206, 208, 208, 208, 207, 208, 206, 206, 207, 207, 206, 207, 207, 207, 206, 207, 207, 206, 205, 206, 206, 206, 206, 206, 207, 206, 207, 207, 207, 207, 207, 207, 207, 207, 207, 207, 206, 206, 206, 206, 206, 206, 206, 206, 206, 206, 207, 206, 206, 207, 206, 207, 206, 206, 206, 206, 207, 207, 207, 207, 207, 207, 207, 207, 207, 207, 207, 207, 206, 206, 206, 206, 207, 207, 206, 206, 206, 206, 206, 206, 206, 206, 206, 204, 204, 204, 204, 205, 204, 204, 204, 203, 204, 47, 100, 123, 145, 160, 84, 127, 83, 34, 19, 11, 9, 24, 45, 69, 152, 110, 48, 29, 20, 22, 22, 20, 23, 44, 72, 81, 87, 122, 143, 147, 129, 148, 150, 109, 137, 170, 188, 134, 141, 170, 193, 184, 159, 177, 59, 26, 22, 20, 29, 51, 69, 93, 94, 107, 115, 166, 184, 200, 205, 204, 203, 203, 204, 205, 205, 205, 205, 206, 206, 206, 206, 205, 206, 206, 205, 205, 206, 206, 206, 206, 206, 206, 206, 206, 206, 206, 206, 206, 206, 206, 206, 206, 206, 206, 206, 206, 206, 206, 206, 206, 206, 206, 206, 206, 206, 206, 206, 206, 204, 205, 205, 206, 207, 206, 206, 206, 206, 206, 206, 204, 202, 199, 182, 117, 124, 118, 112, 111, 106, 101, 45, 12, 14, 8, 15, 15, 5, 11, 9, 5, 8, 7, 13, 10, 7, 9, 9, 12, 11, 15, 7, 17, 39, 56, 113, 118, 132, 152, 190, 202, 202, 203, 204, 207, 209, 209, 208, 206, 207, 206, 206, 207, 207, 207, 207, 207, 207, 206, 207, 208, 207, 205, 207, 207, 207, 207, 207, 207, 207, 207, 207, 206, 206, 207, 207, 207, 207, 207, 207, 206, 207, 207, 207, 207, 207, 207, 207, 207, 207, 207, 206, 206, 207, 206, 207, 206, 206, 206, 206, 207, 207, 207, 207, 207, 207, 207, 207, 207, 207, 207, 207, 206, 206, 206, 206, 207, 207, 206, 206, 206, 206, 206, 206, 206, 206, 206, 204, 204, 204, 204, 204, 204, 204, 204, 203, 204, 27, 47, 81, 109, 68, 53, 47, 17, 28, 23, 25, 21, 50, 83, 90, 73, 102, 86, 72, 68, 48, 105, 72, 45, 57, 66, 117, 119, 153, 165, 182, 182, 171, 159, 194, 206, 190, 133, 135, 125, 92, 74, 58, 55, 53, 29, 21, 68, 63, 83, 111, 98, 117, 149, 166, 186, 190, 181, 186, 204, 205, 205, 202, 205, 205, 205, 204, 205, 206, 206, 206, 205, 205, 206, 206, 206, 206, 206, 206, 206, 206, 206, 205, 205, 205, 205, 205, 206, 206, 206, 206, 206, 206, 206, 206, 206, 206, 206, 207, 207, 206, 207, 206, 206, 206, 206, 207, 207, 206, 205, 205, 205, 205, 205, 206, 205, 204, 205, 204, 206, 203, 199, 173, 112, 119, 113, 88, 67, 42, 17, 14, 13, 14, 12, 11, 9, 13, 9, 15, 19, 20, 24, 20, 21, 18, 13, 20, 13, 10, 11, 7, 7, 8, 11, 13, 10, 28, 37, 71, 100, 133, 186, 205, 205, 208, 209, 209, 208, 208, 207, 208, 207, 206, 207, 208, 207, 207, 207, 207, 207, 207, 208, 207, 206, 207, 207, 207, 207, 207, 207, 207, 207, 207, 207, 207, 207, 207, 207, 207, 207, 207, 207, 207, 206, 206, 208, 208, 207, 207, 207, 207, 208, 207, 207, 208, 207, 208, 208, 206, 206, 206, 206, 207, 207, 207, 207, 207, 207, 207, 207, 207, 207, 207, 206, 206, 206, 206, 206, 206, 205, 206, 206, 206, 206, 206, 206, 206, 206, 204, 204, 204, 204, 204, 204, 204, 204, 204, 204, 116, 140, 72, 52, 55, 66, 41, 40, 45, 27, 34, 33, 44, 46, 44, 93, 88, 33, 54, 59, 43, 56, 71, 81, 86, 89, 116, 84, 112, 158, 167, 174, 188, 206, 195, 174, 93, 83, 113, 92, 146, 188, 186, 174, 139, 95, 75, 77, 101, 86, 114, 142, 173, 175, 151, 148, 157, 169, 177, 201, 204, 204, 206, 203, 204, 205, 204, 205, 206, 206, 206, 206, 206, 206, 206, 206, 206, 206, 206, 206, 205, 204, 207, 207, 207, 207, 206, 206, 206, 206, 206, 206, 206, 206, 206, 206, 206, 206, 206, 206, 207, 207, 206, 206, 207, 206, 207, 207, 206, 205, 205, 205, 205, 205, 204, 204, 204, 203, 208, 205, 203, 185, 116, 120, 73, 43, 21, 12, 15, 12, 8, 13, 10, 16, 25, 39, 48, 57, 61, 63, 67, 70, 63, 47, 54, 56, 54, 62, 56, 52, 38, 33, 21, 5, 7, 8, 14, 15, 25, 52, 106, 185, 204, 208, 208, 207, 208, 208, 208, 208, 208, 208, 209, 209, 208, 207, 207, 207, 207, 207, 207, 207, 207, 207, 207, 207, 207, 207, 207, 207, 207, 207, 207, 207, 207, 207, 207, 208, 206, 206, 207, 207, 206, 207, 208, 208, 209, 208, 208, 208, 208, 207, 208, 208, 207, 207, 208, 207, 206, 206, 207, 208, 207, 207, 206, 206, 206, 206, 206, 206, 206, 206, 206, 207, 207, 207, 207, 207, 207, 207, 206, 206, 206, 206, 206, 206, 206, 204, 204, 204, 204, 204, 204, 204, 204, 204, 204, 17, 18, 28, 91, 99, 79, 65, 83, 76, 45, 48, 43, 31, 17, 21, 24, 27, 23, 59, 42, 36, 59, 80, 62, 62, 105, 96, 119, 140, 133, 165, 204, 201, 202, 205, 195, 126, 115, 64, 97, 150, 149, 147, 156, 116, 118, 115, 53, 106, 157, 86, 84, 125, 159, 176, 200, 188, 203, 190, 184, 202, 202, 204, 206, 205, 206, 205, 206, 206, 206, 206, 206, 206, 206, 206, 206, 206, 205, 205, 205, 205, 205, 205, 205, 205, 205, 205, 206, 206, 206, 206, 206, 206, 206, 206, 206, 206, 206, 206, 206, 206, 207, 206, 205, 206, 206, 206, 206, 206, 204, 204, 204, 204, 204, 203, 202, 204, 205, 205, 200, 189, 123, 105, 55, 18, 9, 11, 9, 7, 16, 30, 62, 67, 71, 66, 67, 66, 70, 73, 71, 43, 34, 66, 45, 40, 50, 73, 68, 70, 68, 71, 69, 53, 39, 20, 14, 13, 10, 12, 19, 37, 86, 188, 206, 208, 207, 208, 208, 208, 208, 208, 208, 208, 208, 208, 207, 207, 207, 207, 207, 207, 207, 208, 207, 207, 207, 207, 207, 207, 207, 207, 207, 207, 207, 207, 207, 207, 207, 207, 207, 207, 208, 207, 207, 208, 208, 208, 208, 208, 208, 209, 208, 208, 208, 207, 207, 207, 207, 207, 207, 208, 208, 207, 207, 207, 207, 207, 207, 206, 206, 207, 207, 207, 207, 207, 207, 207, 207, 207, 207, 207, 207, 207, 207, 207, 207, 207, 205, 205, 204, 204, 204, 204, 204, 204, 204, 204, 42, 47, 70, 74, 93, 94, 43, 57, 72, 69, 93, 99, 52, 37, 34, 11, 7, 13, 10, 11, 29, 31, 47, 81, 117, 91, 86, 83, 86, 102, 144, 169, 188, 204, 202, 193, 199, 161, 139, 153, 57, 128, 172, 173, 153, 133, 134, 141, 113, 115, 134, 170, 101, 126, 137, 139, 131, 156, 190, 198, 202, 203, 205, 205, 205, 206, 206, 206, 205, 205, 206, 206, 206, 205, 205, 206, 206, 206, 205, 205, 205, 206, 206, 206, 206, 206, 206, 206, 206, 206, 206, 206, 206, 206, 206, 206, 206, 205, 205, 205, 205, 206, 206, 206, 206, 206, 206, 206, 206, 206, 206, 205, 205, 207, 207, 204, 205, 204, 201, 200, 198, 128, 87, 23, 9, 11, 5, 4, 25, 47, 59, 64, 66, 57, 40, 33, 66, 74, 75, 74, 74, 58, 39, 21, 33, 38, 69, 66, 65, 60, 20, 19, 46, 61, 68, 67, 56, 23, 8, 9, 14, 28, 91, 140, 204, 208, 209, 207, 209, 207, 208, 208, 208, 206, 207, 207, 207, 207, 207, 207, 207, 207, 207, 207, 207, 207, 207, 207, 207, 207, 207, 207, 206, 207, 207, 207, 207, 206, 207, 207, 207, 208, 207, 207, 207, 208, 209, 208, 207, 208, 206, 208, 208, 209, 206, 207, 207, 207, 207, 207, 207, 207, 207, 207, 207, 207, 208, 209, 208, 208, 208, 208, 208, 207, 207, 207, 207, 207, 207, 207, 208, 208, 208, 208, 208, 208, 208, 206, 205, 204, 203, 204, 204, 204, 204, 204, 204, 75, 109, 86, 90, 84, 127, 73, 127, 45, 45, 116, 70, 30, 29, 15, 14, 15, 9, 26, 70, 66, 79, 118, 155, 160, 167, 140, 146, 131, 139, 164, 200, 202, 197, 203, 199, 161, 133, 185, 105, 80, 137, 180, 177, 137, 142, 149, 170, 113, 116, 127, 169, 126, 121, 157, 176, 190, 175, 175, 201, 206, 205, 204, 206, 206, 206, 206, 205, 205, 206, 206, 206, 205, 205, 206, 206, 206, 206, 206, 206, 206, 206, 206, 206, 206, 206, 206, 206, 206, 206, 206, 206, 206, 206, 206, 206, 206, 206, 206, 206, 206, 206, 206, 206, 206, 206, 206, 206, 206, 205, 206, 206, 208, 207, 209, 204, 203, 200, 205, 140, 45, 16, 14, 7, 9, 29, 63, 67, 66, 64, 71, 46, 12, 17, 17, 21, 23, 35, 18, 13, 25, 47, 59, 47, 12, 27, 61, 48, 30, 23, 30, 17, 17, 33, 69, 76, 69, 49, 26, 9, 13, 13, 34, 122, 207, 206, 206, 208, 206, 206, 206, 207, 208, 206, 207, 207, 208, 207, 207, 207, 207, 207, 208, 208, 208, 208, 207, 207, 207, 207, 207, 208, 207, 207, 207, 206, 206, 205, 205, 207, 208, 208, 208, 208, 208, 208, 208, 207, 208, 206, 208, 208, 209, 206, 207, 207, 207, 208, 208, 208, 208, 208, 208, 208, 208, 208, 207, 208, 208, 208, 208, 208, 207, 207, 208, 207, 207, 207, 207, 208, 208, 208, 208, 208, 208, 208, 206, 206, 205, 205, 205, 205, 204, 204, 203, 204, 43, 89, 98, 50, 42, 104, 60, 87, 54, 116, 97, 44, 12, 19, 13, 8, 12, 11, 21, 36, 62, 119, 111, 127, 149, 168, 185, 182, 186, 148, 187, 179, 202, 205, 202, 196, 173, 156, 155, 155, 110, 136, 157, 193, 139, 174, 150, 165, 156, 103, 146, 139, 148, 141, 143, 174, 191, 190, 206, 203, 207, 206, 204, 206, 206, 206, 206, 205, 205, 206, 206, 206, 205, 205, 206, 206, 206, 206, 206, 206, 206, 206, 206, 206, 206, 206, 206, 206, 206, 206, 206, 206, 206, 206, 206, 206, 207, 207, 207, 207, 206, 206, 206, 206, 206, 206, 206, 206, 206, 206, 206, 206, 208, 208, 206, 205, 202, 202, 114, 34, 20, 13, 9, 20, 54, 70, 66, 66, 65, 66, 43, 26, 36, 40, 42, 43, 45, 48, 62, 59, 78, 70, 73, 71, 67, 68, 57, 61, 39, 33, 15, 32, 53, 33, 53, 55, 61, 68, 70, 35, 8, 14, 18, 23, 117, 209, 210, 208, 207, 207, 207, 207, 208, 207, 208, 208, 208, 208, 208, 208, 208, 208, 208, 208, 207, 207, 207, 207, 207, 207, 207, 207, 207, 207, 207, 207, 208, 207, 207, 208, 208, 208, 209, 208, 208, 207, 207, 207, 208, 207, 208, 208, 209, 206, 207, 207, 207, 208, 208, 208, 208, 208, 208, 207, 207, 207, 206, 207, 208, 208, 208, 208, 207, 207, 208, 208, 208, 208, 208, 208, 208, 208, 208, 208, 208, 208, 207, 206, 205, 204, 205, 205, 205, 204, 204, 204, 24, 32, 22, 24, 7, 17, 26, 33, 36, 65, 52, 22, 15, 13, 10, 14, 13, 16, 18, 26, 78, 77, 107, 142, 140, 171, 173, 150, 185, 199, 191, 181, 195, 204, 204, 203, 200, 193, 170, 151, 196, 150, 123, 145, 169, 135, 182, 155, 191, 171, 160, 109, 148, 178, 173, 179, 166, 195, 200, 204, 205, 205, 206, 206, 205, 206, 206, 206, 205, 205, 206, 206, 206, 205, 205, 206, 206, 206, 207, 207, 206, 206, 206, 206, 206, 206, 206, 206, 206, 206, 206, 206, 206, 206, 206, 206, 206, 205, 204, 205, 205, 206, 206, 206, 206, 206, 206, 206, 206, 206, 206, 205, 205, 207, 205, 206, 201, 200, 146, 45, 18, 9, 5, 37, 66, 63, 65, 51, 58, 48, 38, 41, 56, 79, 73, 70, 69, 57, 72, 67, 69, 56, 68, 54, 35, 63, 52, 75, 40, 67, 65, 78, 82, 72, 68, 64, 24, 35, 44, 53, 70, 43, 16, 13, 10, 19, 45, 138, 202, 207, 207, 207, 207, 206, 204, 207, 206, 207, 207, 207, 207, 208, 208, 208, 207, 207, 207, 207, 207, 207, 206, 206, 207, 206, 207, 207, 207, 207, 207, 207, 208, 208, 206, 207, 207, 207, 206, 207, 207, 207, 208, 207, 208, 208, 209, 207, 208, 208, 207, 207, 207, 207, 207, 207, 208, 208, 208, 208, 208, 208, 208, 208, 208, 208, 207, 207, 208, 208, 208, 208, 208, 208, 208, 208, 208, 208, 208, 208, 204, 205, 204, 204, 204, 204, 205, 205, 205, 204, 13, 10, 14, 17, 8, 9, 9, 11, 13, 31, 46, 22, 23, 14, 14, 11, 26, 36, 24, 29, 36, 61, 67, 142, 149, 162, 172, 181, 186, 205, 206, 207, 207, 202, 202, 201, 203, 200, 195, 181, 183, 182, 163, 160, 157, 146, 182, 184, 186, 195, 192, 165, 174, 170, 195, 200, 203, 197, 202, 207, 205, 205, 206, 207, 206, 206, 206, 206, 206, 206, 206, 206, 206, 206, 206, 206, 207, 206, 207, 206, 206, 206, 206, 206, 206, 206, 206, 207, 207, 206, 206, 206, 206, 206, 206, 206, 206, 206, 205, 205, 206, 206, 206, 206, 206, 206, 206, 206, 206, 206, 206, 206, 207, 207, 206, 200, 205, 150, 38, 15, 8, 12, 37, 69, 66, 62, 40, 61, 68, 64, 85, 73, 51, 44, 34, 15, 41, 15, 52, 40, 47, 23, 48, 27, 53, 80, 78, 92, 28, 40, 17, 70, 12, 44, 49, 58, 74, 76, 41, 35, 23, 40, 42, 17, 3, 19, 49, 174, 207, 207, 208, 207, 205, 205, 207, 206, 207, 207, 207, 208, 208, 208, 207, 207, 207, 208, 208, 207, 207, 206, 206, 207, 207, 207, 207, 207, 207, 207, 207, 207, 208, 207, 207, 206, 207, 207, 207, 207, 207, 207, 208, 208, 208, 208, 208, 208, 208, 208, 207, 207, 207, 208, 208, 208, 208, 208, 207, 207, 207, 208, 208, 208, 208, 208, 208, 208, 209, 209, 209, 209, 209, 209, 209, 209, 209, 209, 209, 205, 206, 206, 205, 204, 204, 205, 205, 205, 205, 7, 20, 18, 13, 10, 7, 12, 7, 6, 11, 21, 39, 27, 24, 17, 21, 21, 72, 76, 99, 84, 80, 97, 128, 168, 176, 180, 200, 204, 205, 203, 204, 205, 206, 206, 206, 205, 204, 196, 197, 180, 185, 188, 174, 205, 184, 197, 202, 200, 201, 198, 197, 196, 200, 206, 207, 204, 205, 206, 206, 207, 206, 206, 207, 206, 206, 206, 206, 206, 206, 206, 206, 206, 206, 206, 206, 207, 206, 207, 206, 206, 206, 206, 206, 206, 206, 206, 207, 207, 207, 207, 206, 206, 206, 206, 206, 206, 206, 206, 206, 206, 206, 206, 206, 206, 206, 206, 206, 206, 206, 206, 207, 207, 207, 207, 204, 186, 58, 24, 11, 9, 47, 71, 71, 71, 53, 69, 88, 63, 65, 48, 61, 21, 39, 25, 17, 49, 21, 50, 14, 43, 19, 41, 17, 55, 75, 85, 81, 28, 47, 28, 65, 19, 41, 29, 29, 56, 41, 66, 59, 72, 38, 58, 45, 13, 17, 19, 74, 206, 208, 209, 207, 205, 204, 207, 206, 207, 207, 206, 207, 207, 207, 207, 207, 207, 208, 207, 207, 206, 206, 207, 207, 207, 207, 207, 207, 207, 207, 207, 207, 207, 207, 207, 207, 207, 207, 207, 207, 208, 208, 208, 208, 208, 208, 208, 207, 208, 208, 208, 209, 209, 208, 208, 208, 208, 208, 208, 208, 208, 208, 208, 208, 208, 208, 208, 209, 209, 209, 209, 209, 209, 209, 209, 209, 209, 209, 209, 207, 207, 207, 206, 205, 205, 205, 205, 205, 205, 4, 13, 10, 36, 27, 8, 12, 11, 32, 22, 18, 19, 30, 42, 29, 31, 22, 55, 103, 123, 81, 125, 118, 155, 145, 175, 197, 204, 205, 202, 206, 204, 206, 204, 203, 203, 204, 205, 198, 196, 190, 195, 199, 202, 201, 203, 204, 203, 207, 202, 203, 203, 205, 208, 208, 205, 207, 207, 204, 207, 208, 206, 205, 206, 206, 206, 206, 206, 206, 206, 206, 206, 206, 206, 206, 206, 207, 206, 206, 206, 206, 206, 207, 207, 206, 206, 207, 207, 207, 207, 207, 207, 207, 207, 207, 207, 206, 206, 207, 207, 206, 207, 207, 207, 207, 207, 207, 207, 207, 207, 206, 207, 207, 207, 207, 205, 111, 23, 13, 13, 10, 35, 63, 63, 72, 75, 70, 74, 68, 58, 71, 59, 64, 24, 49, 27, 35, 46, 42, 47, 20, 47, 17, 41, 14, 46, 59, 79, 81, 41, 42, 26, 61, 22, 52, 28, 44, 50, 28, 47, 27, 34, 85, 81, 73, 39, 17, 22, 30, 165, 208, 209, 207, 205, 204, 207, 206, 206, 206, 207, 207, 208, 208, 207, 208, 207, 208, 207, 206, 206, 207, 207, 207, 207, 207, 207, 207, 207, 207, 207, 207, 207, 208, 207, 207, 207, 208, 207, 207, 208, 208, 207, 207, 207, 207, 207, 207, 208, 208, 208, 208, 209, 209, 209, 209, 209, 209, 209, 209, 209, 208, 208, 208, 208, 209, 209, 209, 209, 209, 209, 209, 209, 209, 209, 209, 209, 209, 209, 207, 207, 206, 205, 205, 205, 205, 205, 205, 204, 9, 24, 18, 20, 13, 9, 20, 27, 22, 9, 18, 31, 63, 55, 63, 55, 93, 101, 117, 115, 158, 169, 135, 138, 149, 167, 171, 172, 185, 201, 207, 206, 206, 206, 206, 205, 206, 206, 206, 206, 206, 206, 206, 206, 206, 206, 206, 206, 207, 207, 204, 206, 207, 206, 205, 206, 206, 206, 206, 207, 207, 206, 206, 206, 206, 206, 206, 206, 206, 206, 206, 206, 206, 206, 206, 206, 206, 205, 205, 205, 204, 206, 207, 207, 207, 207, 207, 206, 206, 207, 207, 206, 207, 205, 205, 205, 206, 208, 209, 210, 208, 209, 208, 209, 208, 209, 209, 209, 210, 203, 205, 208, 207, 205, 175, 41, 20, 12, 31, 70, 76, 80, 72, 74, 56, 74, 67, 68, 73, 38, 60, 24, 53, 39, 40, 38, 39, 39, 34, 31, 34, 34, 31, 33, 28, 33, 45, 44, 42, 37, 51, 32, 52, 31, 56, 46, 31, 48, 19, 51, 89, 84, 92, 88, 65, 27, 24, 83, 206, 206, 209, 204, 208, 207, 207, 207, 207, 207, 209, 209, 207, 208, 208, 208, 208, 207, 205, 206, 207, 206, 207, 207, 207, 208, 207, 207, 207, 207, 207, 207, 207, 207, 207, 207, 207, 206, 207, 208, 208, 207, 207, 207, 207, 207, 208, 208, 208, 208, 208, 208, 209, 209, 209, 208, 209, 209, 208, 209, 209, 208, 208, 209, 209, 209, 209, 209, 209, 209, 209, 209, 209, 209, 209, 209, 209, 209, 210, 209, 209, 207, 205, 205, 205, 205, 205, 205, 19, 35, 29, 22, 20, 39, 21, 19, 18, 14, 32, 62, 116, 63, 94, 118, 107, 75, 88, 103, 76, 101, 136, 171, 178, 187, 185, 193, 198, 204, 207, 208, 207, 206, 204, 207, 207, 206, 207, 206, 205, 206, 206, 206, 206, 205, 205, 205, 205, 206, 205, 206, 207, 206, 206, 206, 206, 206, 206, 207, 207, 206, 206, 206, 206, 206, 206, 206, 206, 206, 206, 206, 205, 206, 206, 206, 206, 206, 207, 207, 207, 208, 207, 207, 206, 206, 206, 207, 207, 208, 207, 207, 207, 206, 206, 206, 206, 209, 210, 210, 208, 209, 208, 209, 208, 208, 208, 208, 208, 208, 206, 209, 209, 203, 119, 28, 14, 20, 55, 73, 76, 38, 55, 67, 56, 81, 70, 75, 69, 55, 50, 41, 31, 22, 17, 12, 9, 9, 6, 8, 7, 13, 10, 9, 9, 13, 10, 14, 15, 16, 15, 14, 14, 22, 20, 33, 39, 46, 32, 48, 46, 81, 83, 82, 90, 88, 79, 85, 57, 38, 188, 208, 207, 205, 207, 207, 207, 208, 208, 208, 208, 207, 207, 207, 207, 207, 207, 207, 207, 207, 207, 207, 207, 206, 207, 207, 207, 207, 207, 207, 207, 207, 207, 207, 206, 206, 206, 207, 207, 208, 208, 207, 207, 207, 207, 207, 208, 208, 208, 208, 208, 208, 209, 209, 209, 209, 208, 210, 209, 208, 209, 208, 209, 209, 209, 209, 209, 209, 209, 209, 209, 209, 209, 209, 209, 209, 209, 209, 209, 209, 209, 207, 205, 205, 205, 205, 206, 204, 26, 49, 41, 21, 21, 19, 26, 71, 65, 90, 62, 53, 71, 88, 134, 120, 129, 114, 100, 108, 122, 154, 170, 170, 190, 184, 179, 174, 176, 182, 187, 188, 198, 207, 205, 207, 206, 207, 207, 206, 206, 206, 206, 206, 206, 206, 206, 206, 206, 206, 206, 206, 206, 206, 206, 206, 206, 206, 206, 206, 206, 206, 206, 206, 206, 206, 206, 206, 206, 206, 205, 205, 205, 206, 206, 206, 206, 207, 207, 207, 206, 207, 208, 207, 207, 207, 207, 207, 208, 210, 210, 209, 209, 206, 206, 206, 207, 209, 210, 211, 208, 209, 208, 209, 208, 208, 209, 209, 208, 203, 209, 209, 207, 209, 63, 30, 34, 79, 62, 54, 63, 49, 61, 73, 65, 73, 55, 44, 25, 16, 12, 13, 15, 13, 8, 8, 9, 8, 9, 8, 9, 9, 9, 9, 13, 10, 13, 10, 6, 6, 7, 9, 9, 8, 13, 10, 11, 16, 18, 20, 26, 41, 61, 76, 72, 76, 65, 74, 52, 82, 82, 146, 192, 204, 205, 204, 207, 206, 207, 209, 209, 208, 206, 208, 208, 207, 206, 206, 206, 207, 207, 207, 208, 207, 206, 206, 207, 207, 207, 206, 207, 207, 208, 208, 208, 208, 208, 208, 208, 207, 207, 207, 207, 207, 207, 207, 207, 208, 208, 208, 208, 208, 208, 209, 209, 209, 209, 207, 206, 208, 208, 209, 209, 209, 209, 209, 209, 209, 209, 209, 209, 208, 208, 209, 209, 209, 209, 209, 209, 209, 209, 209, 208, 205, 205, 206, 206, 206, 205, 42, 65, 71, 37, 29, 17, 54, 112, 107, 148, 138, 125, 107, 112, 103, 128, 144, 138, 109, 81, 65, 73, 104, 130, 123, 115, 121, 146, 175, 185, 190, 199, 206, 208, 209, 206, 207, 206, 207, 205, 207, 206, 206, 204, 206, 206, 205, 206, 206, 206, 206, 206, 206, 206, 206, 206, 206, 206, 206, 206, 206, 206, 206, 206, 205, 206, 206, 206, 207, 207, 207, 206, 206, 208, 208, 208, 208, 207, 207, 206, 207, 208, 208, 208, 208, 208, 208, 209, 209, 209, 209, 209, 209, 207, 207, 207, 207, 209, 210, 211, 209, 209, 209, 209, 209, 207, 208, 208, 208, 206, 209, 209, 207, 194, 40, 59, 82, 69, 58, 52, 63, 32, 51, 56, 42, 26, 14, 13, 10, 8, 6, 11, 13, 13, 12, 13, 10, 11, 13, 10, 11, 8, 8, 8, 13, 10, 8, 11, 13, 10, 12, 14, 15, 12, 13, 10, 13, 10, 13, 10, 8, 12, 12, 11, 12, 14, 16, 13, 15, 34, 50, 48, 43, 60, 63, 78, 85, 140, 182, 207, 206, 208, 206, 207, 208, 208, 207, 207, 207, 207, 206, 206, 207, 207, 207, 207, 207, 208, 208, 206, 206, 207, 207, 207, 207, 206, 207, 208, 209, 208, 207, 207, 208, 208, 207, 207, 207, 207, 207, 207, 207, 207, 208, 208, 208, 208, 208, 208, 208, 208, 209, 209, 209, 208, 209, 209, 210, 209, 209, 209, 209, 209, 209, 209, 209, 209, 208, 208, 209, 209, 209, 209, 209, 209, 209, 209, 209, 208, 206, 206, 206, 206, 206, 206, 33, 68, 33, 54, 47, 48, 95, 133, 155, 176, 148, 146, 132, 159, 159, 140, 140, 148, 77, 82, 136, 89, 58, 88, 81, 89, 104, 149, 190, 198, 195, 197, 202, 206, 208, 205, 208, 207, 205, 205, 204, 206, 205, 208, 206, 207, 206, 206, 206, 206, 206, 206, 206, 206, 206, 206, 206, 206, 206, 206, 205, 205, 206, 207, 206, 207, 207, 207, 207, 207, 207, 206, 207, 207, 207, 207, 207, 207, 208, 209, 208, 209, 209, 209, 209, 209, 209, 209, 209, 209, 209, 209, 209, 207, 208, 208, 208, 209, 210, 211, 212, 210, 210, 210, 209, 208, 208, 207, 207, 208, 207, 207, 201, 154, 68, 72, 51, 68, 56, 62, 64, 35, 38, 19, 13, 13, 10, 8, 6, 9, 11, 13, 12, 13, 11, 13, 10, 11, 12, 14, 13, 14, 12, 13, 13, 12, 11, 15, 16, 15, 17, 17, 13, 13, 13, 14, 12, 9, 11, 14, 16, 14, 17, 16, 17, 36, 32, 66, 61, 68, 96, 150, 141, 193, 208, 209, 208, 208, 208, 207, 208, 208, 208, 208, 207, 207, 207, 207, 207, 206, 206, 206, 206, 206, 206, 207, 207, 207, 206, 207, 207, 208, 208, 208, 207, 206, 206, 207, 207, 207, 207, 207, 207, 207, 207, 207, 207, 208, 208, 207, 208, 208, 208, 208, 209, 209, 209, 209, 209, 208, 208, 208, 209, 209, 210, 209, 208, 209, 210, 209, 208, 208, 209, 209, 209, 209, 209, 209, 209, 209, 209, 209, 206, 206, 206, 207, 207, 207, 74, 39, 58, 50, 67, 62, 109, 106, 148, 158, 192, 176, 166, 152, 166, 180, 179, 146, 152, 108, 79, 35, 83, 124, 125, 132, 167, 179, 171, 162, 158, 186, 200, 208, 209, 206, 207, 207, 208, 207, 205, 207, 205, 207, 206, 206, 205, 206, 207, 207, 206, 206, 206, 206, 206, 206, 206, 206, 206, 206, 206, 205, 206, 206, 207, 207, 207, 207, 207, 208, 207, 207, 207, 207, 207, 207, 207, 207, 209, 210, 209, 209, 209, 209, 209, 210, 209, 209, 209, 209, 209, 209, 209, 208, 208, 208, 208, 210, 211, 211, 212, 213, 210, 210, 209, 209, 207, 206, 207, 202, 208, 204, 168, 135, 68, 49, 57, 66, 57, 57, 25, 15, 12, 14, 9, 9, 11, 9, 8, 7, 11, 13, 13, 14, 13, 13, 10, 11, 11, 15, 13, 15, 18, 18, 16, 16, 17, 15, 15, 16, 12, 12, 9, 11, 11, 9, 13, 10, 9, 8, 8, 11, 13, 10, 13, 10, 14, 17, 21, 32, 50, 51, 74, 188, 163, 138, 198, 210, 208, 208, 208, 208, 208, 208, 208, 208, 208, 208, 208, 208, 208, 207, 207, 207, 206, 207, 207, 207, 207, 207, 206, 207, 208, 207, 207, 207, 207, 206, 205, 207, 207, 207, 207, 208, 208, 208, 208, 208, 208, 208, 207, 206, 208, 208, 208, 208, 209, 209, 209, 209, 209, 207, 207, 207, 208, 210, 209, 209, 208, 208, 208, 209, 209, 209, 209, 209, 209, 209, 209, 209, 209, 209, 209, 209, 206, 206, 207, 207, 207, 207, 15, 20, 30, 35, 44, 103, 119, 94, 127, 172, 194, 179, 187, 173, 171, 173, 186, 163, 143, 156, 133, 85, 67, 74, 108, 157, 138, 143, 187, 201, 198, 203, 209, 209, 207, 206, 209, 202, 201, 197, 208, 204, 199, 197, 209, 207, 206, 206, 206, 206, 206, 206, 206, 206, 206, 207, 207, 207, 207, 206, 207, 207, 205, 203, 206, 206, 207, 207, 207, 207, 207, 207, 208, 208, 208, 208, 208, 207, 208, 209, 209, 209, 208, 208, 209, 209, 209, 209, 209, 209, 209, 209, 209, 208, 209, 209, 209, 210, 211, 212, 212, 215, 211, 210, 211, 210, 207, 206, 205, 203, 202, 188, 142, 80, 56, 44, 51, 59, 50, 24, 12, 11, 13, 10, 8, 9, 13, 10, 11, 9, 11, 12, 15, 11, 13, 17, 18, 16, 25, 23, 27, 32, 30, 28, 32, 33, 45, 38, 34, 37, 28, 24, 31, 25, 23, 15, 8, 13, 10, 13, 10, 12, 13, 10, 7, 13, 10, 8, 8, 13, 10, 12, 13, 17, 46, 81, 181, 189, 148, 144, 208, 207, 208, 209, 208, 208, 208, 208, 208, 208, 208, 207, 207, 206, 207, 207, 208, 208, 207, 207, 207, 207, 207, 206, 207, 208, 207, 207, 206, 206, 207, 209, 206, 206, 207, 207, 208, 208, 208, 208, 208, 207, 208, 207, 206, 207, 208, 208, 208, 209, 209, 209, 209, 209, 207, 207, 207, 208, 210, 208, 210, 210, 208, 206, 209, 210, 210, 209, 209, 209, 209, 209, 209, 209, 209, 209, 209, 207, 207, 207, 207, 206, 207, 35, 33, 52, 50, 47, 73, 154, 142, 186, 183, 125, 165, 183, 191, 172, 185, 174, 166, 181, 160, 142, 134, 137, 125, 125, 122, 159, 154, 163, 159, 186, 202, 206, 205, 207, 206, 202, 205, 191, 142, 150, 182, 200, 184, 207, 205, 207, 204, 207, 206, 207, 206, 205, 205, 206, 206, 206, 206, 206, 206, 206, 206, 206, 206, 206, 206, 206, 206, 207, 208, 208, 208, 208, 208, 208, 209, 209, 209, 209, 209, 209, 210, 210, 210, 209, 209, 209, 209, 209, 210, 211, 210, 210, 211, 211, 212, 211, 211, 211, 211, 210, 211, 213, 214, 214, 214, 212, 208, 209, 198, 199, 148, 135, 120, 59, 50, 41, 35, 17, 13, 13, 12, 13, 12, 13, 10, 15, 19, 14, 15, 12, 15, 25, 36, 25, 33, 42, 38, 36, 55, 28, 25, 57, 39, 52, 19, 28, 56, 46, 48, 33, 48, 37, 30, 30, 34, 31, 16, 12, 12, 14, 13, 11, 12, 13, 17, 14, 13, 10, 15, 44, 139, 193, 185, 128, 166, 204, 199, 209, 208, 208, 209, 208, 206, 208, 208, 208, 208, 208, 208, 208, 208, 208, 207, 207, 207, 207, 207, 207, 207, 207, 208, 207, 208, 208, 207, 206, 207, 207, 207, 207, 208, 208, 208, 207, 207, 207, 207, 207, 207, 207, 207, 208, 208, 208, 208, 208, 208, 208, 208, 208, 208, 207, 208, 208, 208, 208, 208, 208, 209, 208, 207, 208, 209, 207, 207, 207, 206, 207, 207, 207, 207, 207, 207, 207, 206, 207, 208, 61, 50, 31, 39, 58, 95, 154, 137, 176, 194, 201, 179, 150, 180, 211, 196, 198, 165, 158, 142, 178, 168, 135, 146, 150, 167, 147, 126, 165, 182, 193, 199, 205, 205, 205, 204, 196, 198, 177, 176, 167, 202, 203, 182, 206, 201, 206, 209, 207, 207, 208, 207, 207, 208, 208, 207, 207, 207, 207, 208, 208, 208, 208, 207, 207, 207, 207, 207, 208, 208, 207, 208, 209, 209, 209, 209, 209, 209, 209, 209, 209, 210, 209, 209, 209, 210, 210, 210, 210, 211, 211, 211, 211, 211, 211, 211, 211, 211, 211, 211, 211, 211, 212, 214, 214, 212, 211, 208, 206, 208, 165, 119, 182, 136, 60, 48, 28, 16, 11, 12, 13, 10, 9, 11, 11, 12, 9, 14, 17, 29, 30, 41, 47, 44, 46, 51, 32, 49, 35, 55, 63, 62, 51, 39, 53, 66, 62, 60, 42, 56, 58, 57, 33, 47, 38, 34, 48, 37, 33, 21, 17, 14, 13, 14, 12, 16, 12, 13, 10, 11, 23, 30, 103, 178, 169, 127, 197, 202, 208, 206, 208, 206, 207, 206, 208, 208, 208, 208, 208, 208, 208, 208, 208, 208, 208, 208, 208, 208, 207, 207, 207, 208, 207, 208, 208, 207, 206, 207, 207, 207, 207, 206, 207, 208, 208, 208, 208, 208, 208, 208, 208, 208, 208, 208, 208, 208, 208, 208, 208, 208, 208, 208, 207, 208, 208, 208, 208, 207, 207, 207, 207, 207, 207, 209, 207, 207, 207, 206, 207, 207, 207, 207, 207, 207, 207, 206, 207, 207, 31, 30, 58, 54, 83, 85, 132, 143, 192, 195, 212, 199, 189, 198, 179, 186, 191, 184, 160, 179, 181, 179, 169, 168, 158, 164, 182, 187, 168, 155, 183, 203, 205, 206, 207, 206, 186, 166, 196, 209, 162, 137, 202, 203, 180, 203, 202, 205, 207, 209, 207, 208, 208, 208, 208, 208, 208, 208, 208, 207, 207, 207, 207, 207, 208, 208, 208, 208, 208, 208, 209, 209, 209, 209, 209, 209, 209, 209, 209, 209, 210, 210, 211, 211, 211, 211, 211, 211, 210, 211, 211, 211, 211, 211, 211, 211, 211, 211, 211, 212, 210, 211, 211, 212, 213, 212, 210, 208, 208, 204, 122, 173, 183, 167, 54, 26, 11, 6, 13, 12, 11, 13, 12, 13, 10, 13, 24, 30, 32, 37, 52, 30, 47, 50, 33, 49, 67, 67, 56, 69, 74, 72, 75, 66, 71, 69, 73, 78, 68, 62, 67, 61, 46, 47, 60, 67, 49, 45, 45, 37, 30, 29, 24, 16, 13, 10, 17, 13, 9, 9, 11, 24, 28, 89, 176, 150, 161, 208, 209, 207, 208, 207, 207, 206, 208, 208, 208, 208, 208, 208, 208, 208, 208, 208, 208, 208, 208, 208, 207, 207, 207, 208, 207, 208, 208, 207, 206, 207, 207, 207, 207, 207, 207, 208, 207, 207, 209, 209, 208, 208, 208, 208, 208, 208, 207, 208, 208, 208, 208, 208, 209, 208, 207, 207, 208, 208, 207, 207, 207, 208, 208, 207, 208, 209, 207, 207, 207, 206, 207, 207, 207, 207, 207, 207, 207, 206, 207, 207, 13, 10, 21, 63, 143, 159, 172, 192, 181, 199, 199, 202, 204, 203, 201, 206, 205, 205, 201, 164, 202, 182, 201, 170, 170, 173, 164, 189, 187, 196, 194, 193, 204, 204, 204, 203, 171, 176, 196, 200, 199, 195, 139, 172, 201, 167, 194, 194, 182, 209, 206, 206, 208, 208, 207, 207, 209, 207, 209, 208, 208, 208, 207, 207, 207, 209, 209, 209, 209, 209, 209, 209, 209, 209, 209, 209, 210, 210, 209, 209, 210, 210, 210, 211, 211, 211, 211, 210, 210, 210, 209, 211, 211, 211, 212, 212, 212, 212, 212, 212, 212, 210, 210, 211, 211, 211, 214, 207, 210, 208, 132, 138, 185, 175, 67, 22, 14, 6, 9, 9, 13, 13, 16, 13, 23, 31, 32, 38, 42, 43, 39, 56, 65, 55, 50, 63, 59, 62, 62, 68, 67, 67, 67, 67, 70, 68, 67, 73, 73, 67, 66, 66, 65, 66, 67, 70, 58, 37, 52, 45, 62, 40, 33, 20, 13, 14, 13, 14, 9, 11, 13, 18, 26, 93, 171, 136, 213, 212, 208, 208, 208, 208, 207, 209, 209, 208, 206, 208, 208, 208, 208, 207, 208, 208, 208, 208, 208, 208, 208, 208, 208, 207, 207, 207, 207, 207, 207, 207, 207, 207, 207, 207, 208, 207, 208, 208, 208, 208, 208, 208, 208, 208, 207, 207, 208, 208, 208, 208, 208, 208, 208, 207, 207, 208, 207, 207, 207, 208, 208, 208, 208, 209, 209, 207, 207, 207, 207, 207, 207, 207, 207, 207, 207, 207, 207, 207, 207, 30, 64, 63, 114, 168, 173, 187, 202, 202, 205, 204, 203, 203, 204, 204, 204, 204, 207, 194, 203, 192, 192, 193, 189, 183, 189, 197, 196, 197, 203, 203, 206, 204, 184, 160, 163, 154, 170, 196, 198, 196, 189, 110, 186, 180, 179, 193, 202, 207, 207, 207, 208, 207, 207, 208, 209, 208, 208, 209, 208, 208, 208, 209, 209, 209, 209, 209, 209, 209, 209, 209, 209, 209, 209, 209, 209, 208, 209, 209, 210, 210, 210, 211, 211, 211, 211, 211, 211, 210, 209, 210, 209, 209, 210, 210, 210, 210, 210, 210, 210, 210, 210, 211, 211, 211, 209, 210, 207, 203, 102, 180, 176, 79, 26, 16, 11, 7, 9, 13, 10, 15, 15, 18, 31, 36, 36, 48, 56, 56, 47, 53, 63, 58, 58, 58, 60, 62, 65, 67, 67, 66, 65, 66, 68, 68, 69, 69, 70, 67, 66, 67, 62, 68, 70, 67, 64, 58, 65, 62, 70, 60, 45, 48, 28, 27, 17, 14, 21, 15, 13, 13, 10, 8, 17, 25, 99, 157, 199, 210, 206, 208, 208, 209, 207, 209, 209, 209, 207, 208, 207, 207, 208, 208, 208, 208, 208, 208, 208, 208, 208, 208, 208, 209, 208, 207, 206, 206, 207, 207, 207, 207, 207, 208, 208, 207, 208, 208, 208, 208, 208, 208, 208, 208, 207, 207, 208, 207, 207, 207, 208, 208, 208, 208, 207, 208, 207, 207, 208, 208, 209, 208, 208, 209, 209, 207, 207, 207, 207, 207, 207, 207, 207, 207, 207, 207, 207, 207, 207, 26, 44, 73, 97, 132, 189, 205, 201, 203, 203, 204, 205, 204, 204, 204, 204, 204, 204, 210, 205, 200, 202, 201, 199, 198, 198, 191, 203, 203, 195, 211, 148, 181, 186, 150, 162, 210, 168, 112, 153, 205, 198, 197, 94, 174, 165, 181, 209, 207, 209, 206, 208, 208, 207, 208, 207, 207, 208, 208, 208, 208, 209, 209, 209, 209, 209, 209, 209, 209, 209, 209, 209, 209, 209, 209, 209, 209, 209, 209, 210, 210, 210, 210, 210, 210, 210, 211, 211, 211, 211, 211, 210, 210, 210, 210, 210, 210, 209, 209, 210, 210, 210, 210, 212, 211, 210, 208, 209, 177, 138, 184, 97, 25, 16, 11, 9, 8, 7, 13, 14, 26, 35, 42, 24, 42, 48, 62, 63, 63, 63, 60, 63, 60, 63, 61, 64, 67, 69, 67, 66, 62, 64, 68, 64, 67, 68, 64, 62, 67, 68, 65, 69, 70, 72, 76, 71, 72, 70, 61, 67, 59, 66, 60, 48, 30, 25, 18, 19, 15, 9, 9, 13, 17, 32, 107, 157, 206, 208, 208, 209, 209, 207, 209, 209, 209, 207, 209, 208, 208, 209, 208, 209, 209, 209, 209, 209, 209, 209, 209, 208, 207, 207, 207, 208, 208, 208, 208, 208, 208, 207, 208, 209, 208, 208, 208, 208, 208, 208, 207, 207, 207, 207, 207, 208, 207, 207, 207, 208, 208, 208, 208, 207, 208, 207, 207, 208, 209, 209, 209, 208, 208, 209, 207, 207, 207, 207, 207, 207, 207, 207, 207, 207, 207, 207, 207, 207, 24, 14, 46, 117, 150, 152, 196, 206, 201, 204, 203, 204, 204, 205, 207, 203, 204, 201, 193, 205, 200, 180, 202, 206, 192, 193, 209, 209, 194, 159, 166, 170, 185, 177, 195, 198, 165, 151, 168, 142, 104, 156, 188, 143, 116, 145, 189, 205, 210, 208, 208, 207, 206, 208, 209, 201, 203, 209, 209, 207, 207, 207, 209, 209, 209, 209, 209, 209, 209, 209, 209, 209, 209, 209, 209, 210, 210, 209, 209, 210, 210, 210, 210, 210, 210, 210, 210, 210, 209, 212, 211, 210, 210, 210, 210, 210, 210, 209, 209, 210, 209, 210, 210, 210, 211, 209, 209, 208, 156, 179, 124, 29, 17, 16, 14, 8, 13, 11, 18, 30, 44, 45, 61, 61, 55, 58, 60, 63, 64, 64, 67, 66, 62, 60, 63, 61, 67, 68, 66, 65, 64, 64, 66, 59, 62, 65, 66, 63, 64, 64, 68, 71, 71, 71, 73, 72, 73, 70, 73, 69, 66, 72, 71, 45, 47, 42, 36, 18, 16, 8, 8, 16, 16, 20, 37, 140, 205, 208, 209, 209, 209, 207, 209, 209, 209, 208, 210, 209, 209, 210, 209, 209, 209, 209, 209, 209, 209, 209, 208, 208, 208, 208, 208, 208, 208, 208, 208, 208, 208, 207, 208, 209, 208, 208, 208, 208, 208, 208, 207, 207, 207, 207, 207, 208, 208, 208, 208, 208, 208, 208, 208, 208, 208, 207, 208, 208, 209, 209, 209, 208, 208, 209, 208, 207, 207, 207, 207, 207, 207, 207, 207, 207, 207, 207, 207, 207, 29, 45, 50, 69, 91, 127, 174, 191, 201, 204, 203, 204, 203, 206, 203, 203, 202, 199, 175, 170, 191, 207, 184, 184, 194, 175, 203, 168, 176, 190, 196, 149, 156, 166, 165, 150, 179, 190, 184, 154, 149, 115, 96, 157, 108, 126, 198, 201, 202, 207, 207, 208, 207, 198, 201, 209, 208, 197, 195, 203, 208, 208, 209, 209, 209, 209, 209, 209, 209, 209, 209, 209, 209, 209, 210, 210, 210, 208, 208, 208, 208, 208, 208, 208, 208, 209, 209, 210, 210, 211, 211, 210, 210, 210, 210, 210, 210, 209, 210, 210, 209, 210, 210, 210, 210, 209, 208, 206, 138, 162, 42, 13, 18, 12, 11, 11, 13, 15, 33, 43, 47, 42, 58, 60, 59, 61, 59, 59, 62, 65, 67, 65, 60, 55, 59, 61, 65, 64, 66, 68, 70, 71, 69, 71, 78, 74, 73, 70, 70, 71, 71, 68, 68, 71, 71, 70, 74, 73, 72, 70, 71, 69, 70, 64, 64, 56, 48, 26, 18, 14, 13, 11, 13, 16, 23, 87, 199, 208, 208, 211, 209, 209, 209, 209, 209, 209, 209, 209, 210, 209, 208, 209, 208, 208, 209, 209, 209, 208, 209, 208, 208, 209, 208, 207, 208, 207, 208, 208, 208, 207, 207, 208, 208, 208, 208, 208, 207, 207, 208, 208, 208, 208, 207, 208, 207, 207, 208, 208, 207, 208, 208, 207, 208, 208, 209, 209, 209, 209, 209, 208, 208, 209, 209, 209, 209, 209, 209, 209, 209, 209, 207, 207, 207, 207, 208, 207, 13, 23, 49, 60, 77, 128, 97, 104, 199, 206, 202, 204, 204, 206, 199, 204, 201, 193, 172, 170, 160, 158, 207, 196, 157, 172, 120, 200, 200, 189, 182, 145, 125, 142, 96, 119, 115, 95, 114, 125, 118, 139, 142, 109, 53, 83, 177, 158, 187, 205, 202, 201, 201, 197, 150, 137, 177, 202, 203, 207, 208, 209, 209, 209, 209, 209, 209, 209, 209, 209, 209, 209, 209, 209, 210, 210, 210, 208, 208, 208, 208, 208, 208, 208, 208, 209, 209, 211, 211, 210, 211, 209, 210, 210, 210, 210, 210, 209, 210, 210, 210, 210, 211, 210, 209, 212, 206, 202, 121, 82, 21, 14, 12, 15, 14, 14, 14, 30, 47, 58, 57, 53, 60, 65, 66, 61, 60, 62, 65, 66, 61, 60, 61, 59, 63, 61, 64, 68, 68, 66, 69, 71, 72, 73, 72, 73, 72, 71, 70, 70, 70, 69, 71, 73, 72, 72, 71, 66, 65, 72, 75, 73, 71, 68, 72, 70, 57, 57, 31, 15, 20, 13, 12, 12, 21, 43, 197, 205, 208, 210, 209, 209, 209, 209, 209, 209, 209, 209, 210, 208, 207, 209, 208, 208, 208, 210, 208, 208, 209, 209, 209, 209, 208, 207, 207, 207, 207, 208, 209, 207, 207, 208, 208, 208, 208, 208, 208, 208, 208, 208, 208, 208, 208, 207, 208, 208, 208, 208, 208, 208, 208, 208, 208, 208, 209, 209, 209, 209, 209, 209, 209, 209, 209, 209, 209, 209, 209, 209, 209, 209, 207, 207, 208, 208, 208, 208, 38, 35, 45, 45, 105, 170, 182, 164, 128, 135, 193, 200, 206, 200, 199, 191, 196, 198, 205, 196, 170, 157, 129, 145, 132, 140, 172, 161, 209, 199, 155, 131, 153, 116, 104, 136, 135, 111, 100, 108, 103, 100, 92, 108, 127, 90, 152, 181, 190, 194, 176, 151, 169, 181, 182, 193, 196, 208, 208, 210, 208, 209, 206, 207, 209, 209, 209, 209, 209, 209, 209, 209, 209, 209, 210, 210, 210, 208, 208, 208, 208, 208, 208, 208, 208, 209, 209, 212, 211, 209, 210, 209, 209, 210, 210, 210, 210, 209, 210, 210, 210, 211, 211, 212, 210, 206, 207, 196, 96, 27, 17, 13, 15, 13, 10, 12, 15, 31, 47, 41, 56, 63, 63, 61, 66, 66, 63, 66, 67, 65, 62, 60, 58, 62, 64, 63, 63, 63, 64, 67, 66, 67, 68, 65, 67, 66, 72, 70, 70, 69, 68, 68, 66, 69, 72, 72, 70, 69, 70, 69, 69, 68, 72, 74, 72, 73, 70, 68, 57, 46, 28, 18, 19, 9, 14, 17, 33, 152, 210, 209, 210, 208, 208, 209, 209, 209, 209, 209, 209, 208, 208, 209, 207, 207, 208, 209, 209, 208, 208, 209, 209, 209, 209, 208, 207, 208, 208, 208, 208, 208, 207, 207, 208, 208, 208, 208, 208, 208, 208, 208, 207, 207, 208, 208, 207, 208, 208, 208, 208, 208, 208, 208, 208, 208, 208, 209, 209, 209, 209, 209, 209, 209, 209, 209, 209, 209, 209, 209, 209, 209, 209, 208, 208, 208, 208, 209, 208, 80, 121, 83, 105, 82, 104, 113, 79, 95, 110, 128, 115, 146, 163, 168, 166, 150, 156, 136, 140, 141, 132, 143, 119, 111, 133, 146, 148, 173, 171, 146, 157, 167, 153, 167, 135, 147, 127, 133, 156, 151, 138, 144, 145, 161, 124, 180, 193, 146, 145, 171, 172, 161, 152, 152, 162, 176, 180, 183, 191, 187, 198, 209, 208, 209, 209, 209, 209, 209, 209, 209, 209, 209, 209, 209, 210, 210, 208, 208, 208, 208, 208, 208, 207, 208, 209, 208, 211, 210, 209, 210, 209, 209, 209, 209, 210, 210, 209, 210, 210, 210, 211, 212, 212, 212, 210, 207, 197, 73, 24, 12, 14, 11, 9, 15, 22, 40, 39, 46, 59, 64, 64, 68, 68, 64, 68, 69, 68, 63, 60, 58, 60, 58, 58, 62, 64, 64, 66, 70, 68, 66, 64, 65, 65, 64, 64, 64, 64, 64, 64, 64, 66, 67, 68, 70, 71, 72, 75, 74, 75, 75, 72, 72, 75, 72, 73, 75, 74, 68, 46, 25, 17, 11, 12, 16, 22, 89, 211, 208, 208, 209, 209, 209, 209, 209, 209, 209, 209, 209, 208, 208, 209, 209, 209, 208, 208, 208, 209, 209, 209, 209, 208, 208, 209, 208, 208, 209, 209, 209, 207, 207, 207, 208, 208, 208, 208, 209, 208, 208, 209, 208, 208, 208, 207, 208, 208, 208, 208, 208, 208, 208, 208, 209, 208, 208, 207, 208, 208, 208, 208, 208, 209, 209, 209, 209, 209, 209, 209, 209, 210, 207, 208, 208, 207, 209, 208, 63, 82, 108, 135, 147, 129, 125, 182, 169, 205, 204, 203, 196, 151, 201, 212, 168, 205, 189, 178, 167, 175, 184, 171, 159, 95, 92, 138, 161, 192, 162, 153, 174, 161, 142, 127, 76, 129, 143, 176, 204, 186, 189, 191, 101, 79, 130, 93, 126, 150, 148, 159, 178, 200, 205, 206, 205, 208, 209, 208, 209, 208, 206, 206, 209, 209, 209, 209, 209, 209, 209, 209, 209, 210, 210, 210, 210, 208, 208, 208, 208, 208, 208, 207, 207, 208, 208, 210, 210, 209, 210, 209, 209, 209, 209, 209, 210, 211, 210, 210, 212, 212, 212, 212, 212, 207, 209, 198, 46, 19, 15, 11, 9, 16, 11, 32, 50, 66, 58, 62, 65, 64, 65, 63, 67, 69, 65, 63, 63, 67, 64, 61, 64, 64, 62, 63, 67, 72, 73, 71, 70, 71, 68, 64, 63, 63, 63, 62, 64, 65, 64, 68, 69, 68, 67, 68, 71, 71, 73, 76, 77, 76, 75, 74, 69, 74, 76, 73, 75, 60, 30, 14, 13, 10, 12, 15, 24, 40, 198, 208, 212, 208, 209, 209, 209, 209, 209, 209, 209, 209, 209, 208, 209, 209, 209, 209, 209, 209, 209, 209, 208, 208, 208, 208, 209, 209, 208, 208, 209, 209, 208, 208, 208, 208, 208, 208, 208, 209, 209, 209, 209, 209, 208, 208, 208, 208, 208, 208, 208, 209, 209, 209, 209, 209, 209, 208, 207, 207, 209, 209, 209, 209, 209, 209, 209, 209, 209, 209, 209, 209, 210, 207, 208, 207, 207, 209, 209, 57, 87, 99, 101, 144, 146, 162, 157, 155, 207, 203, 208, 201, 199, 189, 160, 148, 144, 187, 183, 187, 189, 198, 191, 179, 164, 78, 52, 89, 131, 123, 129, 137, 149, 121, 127, 123, 127, 129, 177, 167, 197, 198, 151, 184, 148, 175, 174, 198, 185, 178, 202, 204, 208, 205, 204, 206, 207, 206, 205, 207, 206, 206, 207, 209, 209, 209, 209, 209, 209, 209, 210, 210, 210, 210, 210, 210, 208, 208, 208, 208, 208, 208, 209, 208, 208, 208, 210, 210, 209, 211, 208, 209, 209, 210, 210, 210, 210, 210, 210, 212, 212, 212, 212, 212, 212, 210, 181, 26, 15, 16, 13, 12, 17, 29, 50, 52, 62, 63, 63, 64, 61, 62, 64, 69, 71, 68, 67, 62, 60, 57, 58, 62, 64, 67, 69, 69, 70, 70, 70, 69, 68, 66, 65, 64, 64, 65, 65, 66, 65, 63, 71, 71, 72, 68, 72, 74, 72, 73, 74, 74, 76, 76, 73, 75, 77, 73, 73, 75, 72, 58, 14, 13, 10, 13, 16, 23, 31, 170, 209, 210, 208, 208, 209, 209, 209, 209, 209, 209, 209, 209, 209, 209, 209, 209, 209, 209, 209, 209, 209, 208, 209, 208, 208, 209, 208, 207, 208, 209, 209, 209, 209, 209, 208, 208, 208, 209, 209, 209, 209, 209, 209, 208, 208, 208, 208, 209, 208, 209, 209, 209, 209, 209, 209, 209, 209, 210, 209, 209, 209, 209, 209, 209, 209, 209, 209, 209, 209, 209, 209, 210, 208, 208, 208, 208, 209, 209, 50, 70, 125, 163, 165, 193, 189, 195, 118, 189, 202, 205, 202, 206, 196, 188, 193, 166, 146, 185, 176, 172, 163, 142, 113, 75, 71, 41, 70, 84, 73, 81, 71, 47, 64, 96, 137, 111, 85, 172, 196, 181, 142, 145, 175, 130, 182, 169, 175, 187, 209, 204, 206, 207, 206, 209, 208, 205, 207, 208, 206, 206, 208, 206, 209, 210, 209, 210, 210, 210, 210, 210, 210, 209, 209, 209, 209, 208, 209, 209, 209, 209, 208, 209, 208, 208, 208, 210, 210, 210, 210, 209, 209, 209, 210, 210, 209, 210, 209, 210, 212, 212, 212, 213, 212, 213, 209, 153, 24, 19, 13, 16, 13, 17, 40, 48, 54, 68, 64, 59, 57, 63, 63, 67, 71, 74, 68, 59, 60, 62, 63, 62, 62, 66, 65, 63, 69, 72, 71, 71, 64, 62, 61, 62, 63, 63, 63, 64, 66, 66, 64, 68, 72, 72, 73, 74, 74, 74, 76, 74, 73, 74, 77, 72, 72, 74, 74, 76, 76, 75, 68, 31, 13, 8, 13, 16, 29, 149, 212, 208, 207, 209, 208, 209, 209, 209, 209, 208, 208, 208, 207, 209, 209, 209, 209, 209, 208, 208, 208, 208, 209, 209, 209, 209, 209, 208, 208, 208, 208, 209, 209, 209, 209, 209, 209, 209, 209, 209, 209, 209, 209, 209, 209, 208, 209, 209, 208, 209, 209, 209, 209, 209, 208, 209, 209, 209, 209, 209, 209, 209, 209, 210, 208, 208, 208, 208, 208, 207, 207, 208, 208, 208, 209, 209, 209, 209, 128, 169, 82, 132, 188, 203, 205, 191, 185, 149, 206, 200, 205, 199, 199, 203, 196, 150, 129, 87, 99, 77, 122, 157, 95, 147, 183, 176, 106, 80, 47, 71, 108, 104, 98, 108, 122, 84, 35, 93, 150, 138, 144, 204, 188, 96, 157, 155, 194, 212, 208, 208, 207, 205, 204, 202, 199, 194, 188, 197, 208, 208, 206, 207, 209, 209, 209, 209, 210, 210, 210, 210, 210, 208, 208, 208, 208, 208, 208, 208, 208, 208, 208, 208, 208, 208, 209, 211, 211, 211, 211, 209, 209, 210, 210, 210, 209, 211, 209, 210, 212, 212, 212, 212, 212, 211, 211, 130, 20, 16, 14, 11, 19, 18, 45, 58, 68, 69, 60, 62, 64, 62, 62, 66, 69, 74, 68, 58, 61, 61, 60, 61, 54, 61, 65, 63, 65, 65, 66, 69, 64, 61, 69, 66, 68, 58, 62, 71, 73, 72, 74, 73, 72, 66, 69, 71, 71, 73, 75, 73, 71, 71, 75, 74, 65, 70, 77, 77, 79, 80, 76, 43, 11, 9, 11, 14, 25, 134, 210, 209, 207, 211, 209, 209, 209, 209, 209, 209, 210, 210, 210, 209, 209, 209, 209, 209, 209, 209, 209, 208, 209, 209, 209, 209, 209, 209, 208, 208, 209, 209, 209, 209, 209, 209, 209, 209, 209, 209, 209, 209, 209, 209, 209, 209, 209, 209, 209, 209, 209, 209, 209, 209, 209, 209, 209, 209, 208, 209, 209, 209, 209, 209, 207, 207, 207, 207, 207, 207, 206, 207, 208, 209, 209, 209, 209, 209, 119, 161, 159, 156, 104, 109, 173, 193, 190, 135, 162, 206, 207, 204, 191, 168, 146, 148, 160, 137, 145, 171, 118, 118, 148, 135, 115, 91, 73, 49, 109, 116, 115, 95, 94, 98, 83, 108, 117, 81, 146, 172, 173, 152, 93, 94, 52, 139, 157, 157, 159, 170, 177, 183, 188, 190, 191, 190, 195, 202, 207, 207, 207, 206, 209, 209, 209, 209, 210, 210, 210, 210, 210, 208, 208, 208, 208, 207, 207, 207, 207, 207, 208, 208, 208, 208, 208, 211, 211, 211, 211, 209, 209, 210, 210, 210, 209, 211, 208, 210, 212, 212, 212, 212, 212, 210, 212, 118, 21, 18, 11, 13, 18, 32, 51, 58, 68, 69, 64, 65, 61, 73, 73, 66, 67, 66, 64, 65, 65, 64, 63, 67, 66, 68, 71, 68, 66, 66, 65, 63, 62, 66, 66, 71, 67, 66, 65, 66, 69, 70, 72, 71, 70, 69, 72, 74, 71, 70, 72, 73, 73, 74, 71, 69, 67, 67, 74, 75, 78, 78, 82, 70, 15, 11, 11, 18, 30, 136, 210, 210, 207, 210, 209, 209, 209, 209, 209, 209, 209, 209, 209, 209, 209, 209, 209, 209, 211, 210, 210, 209, 209, 209, 209, 209, 209, 208, 208, 208, 208, 209, 209, 209, 209, 209, 209, 209, 209, 209, 209, 209, 209, 209, 209, 209, 209, 209, 209, 209, 209, 209, 209, 209, 209, 209, 209, 208, 208, 209, 209, 209, 208, 209, 207, 207, 207, 207, 207, 207, 207, 207, 207, 208, 209, 209, 209, 209, 92, 133, 124, 132, 153, 137, 84, 130, 195, 157, 209, 167, 204, 204, 195, 170, 172, 187, 164, 116, 67, 84, 147, 193, 193, 172, 178, 142, 113, 78, 90, 87, 67, 112, 110, 113, 129, 151, 156, 112, 86, 137, 134, 160, 117, 108, 102, 167, 183, 200, 188, 202, 208, 207, 206, 203, 202, 202, 202, 207, 210, 207, 208, 208, 209, 209, 208, 208, 209, 209, 209, 209, 209, 209, 208, 208, 207, 208, 208, 208, 208, 208, 209, 209, 209, 209, 209, 211, 211, 212, 212, 210, 210, 209, 209, 209, 209, 211, 208, 210, 210, 211, 212, 212, 211, 211, 210, 120, 20, 16, 13, 12, 16, 40, 55, 70, 74, 64, 65, 64, 72, 64, 61, 68, 69, 72, 72, 73, 68, 65, 64, 64, 65, 69, 70, 69, 67, 64, 64, 60, 64, 66, 67, 66, 64, 62, 72, 72, 68, 69, 69, 72, 72, 70, 69, 69, 69, 71, 72, 71, 68, 70, 70, 70, 69, 68, 70, 71, 72, 75, 78, 80, 19, 13, 14, 16, 28, 145, 212, 207, 209, 210, 209, 209, 209, 209, 208, 208, 209, 209, 209, 209, 209, 209, 209, 209, 209, 209, 209, 209, 209, 209, 209, 208, 208, 208, 209, 210, 210, 209, 209, 209, 209, 209, 209, 209, 209, 209, 209, 209, 209, 209, 209, 208, 209, 209, 209, 209, 209, 209, 209, 209, 209, 209, 209, 208, 208, 208, 209, 209, 208, 208, 207, 207, 207, 206, 207, 206, 206, 208, 207, 208, 209, 210, 210, 210, 143, 172, 179, 122, 109, 109, 128, 158, 97, 167, 140, 201, 158, 216, 194, 146, 122, 99, 91, 183, 202, 194, 151, 143, 183, 195, 163, 104, 97, 73, 49, 119, 102, 94, 105, 86, 123, 150, 130, 191, 127, 132, 149, 115, 140, 122, 126, 191, 197, 179, 195, 207, 208, 208, 206, 208, 208, 208, 207, 208, 208, 208, 208, 208, 207, 207, 208, 208, 208, 208, 208, 208, 208, 208, 208, 208, 207, 207, 208, 208, 208, 208, 209, 209, 209, 209, 209, 211, 211, 212, 212, 210, 209, 209, 209, 209, 209, 210, 210, 210, 210, 209, 209, 211, 209, 210, 209, 131, 19, 18, 12, 12, 16, 42, 64, 76, 61, 64, 66, 70, 58, 60, 66, 67, 75, 73, 70, 66, 67, 67, 67, 66, 61, 55, 53, 60, 62, 62, 62, 62, 66, 64, 65, 64, 61, 61, 68, 70, 68, 69, 70, 66, 65, 66, 69, 66, 70, 66, 67, 69, 69, 70, 72, 70, 71, 74, 76, 76, 74, 74, 77, 84, 29, 12, 14, 17, 30, 165, 210, 208, 209, 209, 209, 209, 209, 209, 209, 210, 209, 209, 209, 209, 209, 209, 209, 209, 211, 211, 211, 211, 209, 209, 209, 209, 209, 209, 209, 210, 209, 209, 209, 209, 209, 209, 209, 209, 209, 209, 209, 209, 208, 209, 209, 209, 209, 209, 209, 209, 209, 209, 209, 209, 209, 209, 210, 210, 209, 209, 208, 208, 208, 209, 207, 207, 207, 207, 206, 207, 208, 207, 209, 208, 209, 210, 210, 210, 139, 145, 153, 174, 140, 182, 148, 157, 185, 157, 110, 170, 209, 159, 114, 125, 149, 170, 197, 153, 164, 167, 168, 125, 139, 172, 176, 141, 107, 72, 89, 103, 111, 110, 148, 163, 154, 153, 153, 147, 149, 91, 138, 160, 142, 105, 138, 185, 206, 203, 179, 179, 201, 204, 207, 208, 207, 207, 207, 208, 208, 208, 208, 208, 209, 209, 207, 208, 208, 208, 208, 208, 208, 209, 208, 208, 208, 208, 208, 208, 208, 208, 209, 209, 209, 209, 209, 211, 211, 212, 212, 210, 209, 209, 209, 209, 209, 210, 210, 210, 210, 209, 209, 209, 210, 206, 206, 149, 22, 19, 12, 14, 16, 50, 58, 51, 60, 65, 74, 67, 61, 62, 66, 70, 72, 66, 67, 68, 68, 67, 61, 59, 62, 61, 62, 64, 63, 64, 67, 66, 65, 67, 66, 64, 64, 64, 66, 68, 68, 66, 63, 67, 67, 64, 63, 70, 70, 69, 64, 66, 67, 69, 70, 71, 71, 74, 76, 78, 75, 72, 74, 82, 38, 16, 12, 20, 34, 193, 210, 207, 208, 209, 209, 209, 209, 210, 210, 210, 210, 209, 209, 210, 209, 209, 210, 210, 209, 209, 209, 209, 209, 210, 210, 210, 211, 209, 210, 210, 209, 209, 209, 209, 209, 209, 209, 209, 209, 209, 210, 210, 209, 209, 210, 209, 209, 209, 209, 209, 210, 210, 209, 209, 208, 209, 210, 210, 210, 210, 208, 208, 208, 209, 207, 208, 207, 207, 208, 207, 207, 207, 209, 208, 209, 210, 210, 210, 121, 142, 125, 162, 130, 167, 185, 141, 163, 205, 164, 96, 126, 135, 176, 148, 189, 187, 196, 181, 168, 146, 157, 147, 159, 150, 137, 85, 89, 84, 50, 51, 103, 150, 130, 137, 118, 99, 133, 190, 123, 172, 164, 175, 133, 126, 141, 179, 193, 207, 207, 187, 180, 196, 201, 201, 205, 206, 209, 208, 208, 208, 208, 208, 208, 209, 209, 210, 209, 209, 209, 209, 209, 209, 209, 209, 209, 209, 209, 209, 209, 209, 209, 209, 209, 209, 209, 211, 211, 212, 212, 210, 210, 209, 209, 209, 209, 210, 210, 210, 209, 210, 210, 210, 211, 209, 208, 172, 22, 17, 13, 11, 16, 51, 66, 57, 66, 66, 64, 61, 59, 65, 66, 66, 65, 66, 70, 66, 63, 65, 59, 58, 63, 60, 60, 67, 66, 66, 64, 63, 64, 62, 64, 64, 64, 66, 73, 73, 72, 73, 70, 69, 67, 66, 64, 67, 67, 70, 68, 70, 73, 72, 70, 70, 71, 74, 75, 78, 75, 76, 77, 78, 47, 16, 18, 21, 68, 211, 209, 209, 210, 209, 209, 209, 209, 210, 210, 210, 210, 210, 210, 210, 210, 210, 211, 211, 210, 210, 210, 210, 210, 210, 210, 209, 209, 210, 210, 208, 209, 209, 209, 209, 209, 209, 209, 209, 209, 209, 209, 209, 208, 209, 209, 209, 209, 210, 210, 210, 211, 210, 210, 209, 209, 210, 210, 210, 210, 210, 209, 208, 209, 208, 207, 208, 208, 208, 208, 208, 208, 209, 209, 208, 209, 210, 210, 210, 108, 140, 173, 123, 156, 144, 167, 123, 147, 199, 193, 111, 87, 146, 199, 161, 181, 205, 161, 185, 199, 190, 140, 125, 138, 150, 86, 82, 90, 118, 95, 36, 95, 79, 40, 50, 72, 95, 146, 72, 165, 171, 178, 179, 132, 155, 161, 165, 190, 205, 206, 209, 200, 193, 184, 200, 207, 207, 208, 208, 208, 208, 208, 208, 210, 210, 210, 210, 211, 211, 211, 211, 211, 209, 209, 209, 209, 209, 211, 211, 211, 211, 209, 209, 209, 209, 209, 209, 209, 210, 210, 212, 212, 212, 212, 212, 212, 212, 211, 211, 209, 211, 211, 211, 212, 215, 209, 202, 51, 17, 15, 9, 18, 57, 57, 61, 67, 57, 75, 69, 68, 66, 67, 62, 64, 63, 64, 65, 64, 63, 61, 59, 56, 56, 58, 62, 65, 64, 61, 58, 61, 60, 60, 60, 61, 60, 61, 62, 65, 65, 65, 65, 66, 66, 70, 63, 67, 71, 68, 68, 70, 70, 68, 70, 76, 76, 76, 76, 75, 80, 83, 82, 58, 13, 12, 28, 133, 215, 208, 206, 208, 210, 209, 209, 209, 210, 210, 210, 210, 209, 209, 210, 210, 210, 210, 210, 209, 210, 210, 210, 210, 210, 210, 210, 210, 210, 209, 209, 209, 209, 209, 209, 209, 209, 209, 209, 209, 209, 209, 209, 209, 209, 209, 209, 209, 210, 210, 210, 211, 209, 209, 210, 211, 211, 210, 210, 210, 210, 210, 210, 210, 210, 210, 210, 210, 210, 208, 208, 208, 209, 209, 209, 209, 210, 210, 210, 145, 170, 165, 136, 118, 170, 155, 128, 136, 176, 131, 78, 95, 94, 129, 181, 158, 166, 186, 182, 167, 149, 151, 120, 100, 73, 52, 92, 102, 64, 78, 14, 21, 23, 46, 58, 43, 39, 47, 59, 89, 121, 157, 137, 142, 164, 189, 171, 186, 205, 208, 204, 208, 203, 200, 198, 204, 206, 209, 208, 208, 208, 208, 208, 211, 211, 211, 211, 211, 211, 211, 211, 211, 209, 209, 209, 209, 210, 212, 212, 212, 212, 210, 210, 210, 210, 210, 210, 210, 210, 210, 212, 212, 212, 212, 212, 212, 212, 212, 211, 209, 211, 212, 212, 212, 213, 211, 208, 109, 22, 15, 14, 14, 59, 68, 64, 55, 59, 73, 69, 68, 63, 64, 68, 66, 63, 65, 68, 64, 62, 64, 62, 59, 60, 61, 58, 58, 60, 59, 57, 58, 57, 55, 57, 60, 57, 60, 63, 61, 61, 62, 63, 67, 66, 69, 67, 65, 62, 62, 67, 69, 70, 70, 70, 74, 73, 75, 72, 74, 82, 83, 81, 68, 14, 16, 33, 194, 210, 208, 208, 211, 211, 210, 210, 210, 209, 209, 209, 210, 210, 210, 210, 210, 210, 210, 210, 210, 211, 211, 210, 210, 210, 210, 210, 210, 210, 210, 209, 209, 210, 210, 210, 210, 210, 210, 210, 209, 209, 209, 209, 209, 209, 209, 210, 210, 211, 211, 210, 211, 210, 210, 210, 211, 211, 210, 210, 210, 210, 210, 209, 209, 210, 210, 210, 210, 210, 209, 209, 209, 210, 209, 210, 210, 210, 210, 210, 162, 147, 187, 166, 146, 154, 161, 127, 134, 98, 39, 56, 138, 131, 103, 113, 155, 176, 194, 192, 187, 180, 171, 154, 129, 87, 43, 74, 89, 78, 76, 18, 29, 47, 27, 32, 36, 53, 80, 112, 83, 138, 134, 134, 167, 196, 203, 171, 181, 207, 206, 205, 198, 204, 209, 208, 207, 207, 208, 208, 208, 208, 208, 208, 211, 211, 211, 211, 211, 211, 211, 211, 211, 209, 209, 209, 210, 210, 212, 212, 212, 212, 210, 210, 210, 210, 210, 210, 210, 210, 210, 212, 212, 212, 212, 212, 212, 212, 212, 212, 211, 212, 212, 212, 212, 215, 210, 208, 184, 33, 20, 16, 14, 56, 68, 57, 58, 72, 71, 70, 71, 67, 70, 65, 61, 63, 64, 60, 60, 59, 59, 63, 63, 62, 59, 60, 61, 62, 61, 61, 60, 58, 62, 58, 57, 60, 57, 61, 66, 63, 60, 58, 62, 64, 66, 67, 67, 68, 67, 65, 66, 69, 73, 74, 74, 74, 77, 73, 70, 77, 82, 82, 78, 21, 21, 127, 215, 208, 210, 207, 209, 212, 210, 211, 211, 210, 209, 210, 210, 210, 210, 210, 210, 210, 210, 210, 211, 211, 211, 210, 210, 210, 210, 210, 210, 210, 210, 210, 210, 210, 210, 210, 210, 210, 211, 210, 210, 209, 209, 209, 209, 210, 210, 210, 211, 211, 211, 211, 211, 210, 210, 211, 211, 211, 211, 211, 211, 210, 210, 210, 210, 211, 211, 211, 211, 211, 209, 209, 209, 210, 210, 210, 210, 210, 210, 210, 186, 203, 195, 207, 172, 119, 134, 159, 107, 26, 71, 72, 49, 55, 85, 103, 89, 123, 122, 145, 165, 174, 192, 129, 85, 70, 90, 65, 82, 88, 26, 25, 17, 33, 27, 39, 61, 89, 69, 73, 136, 151, 164, 153, 187, 191, 201, 174, 187, 206, 201, 185, 192, 199, 208, 208, 206, 207, 209, 208, 208, 208, 208, 208, 211, 211, 211, 211, 211, 211, 211, 211, 211, 209, 209, 209, 210, 210, 212, 212, 212, 212, 210, 210, 210, 210, 210, 210, 210, 210, 210, 212, 212, 212, 212, 212, 212, 212, 212, 213, 211, 212, 212, 212, 212, 208, 213, 209, 207, 85, 25, 19, 15, 63, 60, 58, 67, 68, 67, 68, 74, 66, 61, 61, 64, 63, 64, 62, 61, 61, 64, 62, 59, 63, 65, 64, 62, 60, 59, 60, 58, 60, 62, 62, 63, 63, 59, 58, 58, 58, 58, 56, 61, 60, 60, 67, 69, 66, 68, 69, 67, 67, 70, 70, 77, 77, 75, 72, 71, 73, 77, 80, 81, 34, 61, 214, 216, 211, 209, 208, 209, 209, 210, 210, 210, 211, 211, 211, 210, 210, 210, 210, 210, 210, 210, 210, 211, 211, 210, 209, 210, 210, 210, 210, 210, 210, 210, 210, 210, 209, 209, 209, 209, 209, 211, 210, 210, 209, 209, 209, 209, 210, 210, 210, 210, 211, 210, 210, 211, 210, 210, 211, 211, 211, 211, 211, 211, 211, 211, 211, 211, 212, 212, 212, 212, 212, 209, 209, 209, 209, 211, 210, 210, 210, 210, 210, 155, 157, 168, 186, 187, 136, 150, 78, 39, 94, 52, 86, 137, 125, 131, 121, 146, 169, 178, 173, 187, 151, 173, 178, 130, 115, 88, 52, 32, 29, 72, 58, 30, 35, 76, 92, 75, 99, 140, 138, 117, 139, 180, 175, 190, 209, 201, 186, 200, 195, 190, 178, 194, 209, 207, 207, 207, 207, 208, 208, 208, 208, 208, 208, 210, 210, 210, 210, 210, 211, 211, 211, 210, 208, 209, 209, 209, 209, 211, 212, 212, 212, 210, 210, 210, 210, 210, 210, 210, 210, 210, 212, 212, 211, 211, 211, 211, 213, 211, 211, 210, 211, 212, 212, 212, 209, 209, 209, 211, 202, 38, 22, 19, 60, 63, 61, 58, 68, 68, 66, 59, 70, 72, 64, 61, 61, 63, 66, 68, 67, 65, 59, 59, 59, 58, 66, 65, 62, 61, 62, 60, 61, 61, 64, 65, 64, 62, 64, 65, 65, 65, 67, 71, 73, 70, 70, 69, 66, 68, 69, 71, 71, 71, 75, 75, 78, 78, 76, 74, 74, 75, 82, 88, 50, 162, 205, 210, 213, 210, 209, 211, 212, 211, 211, 210, 211, 211, 211, 211, 211, 210, 210, 209, 211, 211, 210, 210, 210, 210, 210, 211, 211, 211, 210, 210, 211, 211, 211, 211, 211, 211, 211, 211, 211, 210, 211, 209, 210, 210, 210, 210, 211, 211, 211, 211, 212, 211, 211, 211, 211, 211, 211, 211, 211, 211, 211, 211, 210, 211, 212, 212, 211, 210, 212, 211, 212, 209, 209, 209, 209, 209, 209, 209, 208, 209, 210, 162, 188, 198, 193, 195, 155, 75, 29, 52, 65, 103, 121, 146, 153, 169, 127, 147, 179, 195, 155, 146, 198, 178, 174, 115, 59, 38, 57, 39, 41, 58, 82, 95, 70, 33, 42, 90, 114, 123, 145, 116, 101, 153, 169, 208, 204, 209, 207, 188, 168, 169, 190, 196, 196, 208, 205, 206, 207, 207, 209, 209, 208, 208, 208, 210, 210, 210, 210, 210, 211, 211, 211, 210, 209, 209, 209, 209, 209, 211, 212, 212, 212, 210, 210, 210, 210, 210, 210, 210, 210, 210, 213, 212, 211, 211, 211, 211, 212, 211, 210, 210, 211, 211, 212, 212, 212, 209, 208, 206, 205, 131, 29, 16, 66, 64, 53, 62, 70, 61, 59, 73, 67, 59, 58, 61, 64, 66, 66, 63, 63, 63, 66, 69, 68, 63, 63, 62, 63, 61, 57, 62, 63, 61, 63, 63, 62, 67, 67, 70, 70, 70, 71, 72, 73, 73, 71, 72, 71, 72, 73, 73, 72, 71, 72, 74, 74, 76, 75, 74, 77, 79, 79, 84, 134, 207, 211, 216, 210, 210, 209, 211, 212, 211, 211, 210, 211, 211, 211, 211, 211, 211, 211, 210, 211, 211, 211, 211, 211, 211, 211, 210, 210, 211, 211, 211, 211, 211, 211, 211, 210, 211, 211, 210, 210, 209, 211, 210, 210, 211, 210, 210, 211, 211, 211, 211, 212, 211, 211, 212, 212, 212, 212, 212, 212, 212, 212, 211, 211, 212, 212, 212, 212, 211, 213, 212, 213, 211, 210, 210, 210, 210, 211, 210, 210, 210, 209, 181, 193, 190, 171, 147, 107, 42, 21, 38, 122, 124, 123, 165, 153, 126, 148, 134, 95, 105, 143, 171, 179, 154, 94, 56, 64, 63, 162, 103, 39, 57, 52, 44, 33, 43, 58, 40, 78, 86, 128, 163, 117, 155, 178, 202, 208, 208, 185, 139, 192, 196, 163, 170, 189, 206, 205, 208, 207, 207, 208, 208, 207, 207, 207, 209, 209, 210, 211, 210, 211, 211, 211, 210, 209, 209, 209, 208, 209, 211, 212, 212, 212, 210, 210, 210, 210, 210, 210, 210, 210, 210, 213, 212, 211, 211, 211, 211, 213, 211, 211, 209, 210, 210, 211, 212, 212, 210, 209, 208, 213, 207, 87, 30, 61, 69, 60, 60, 66, 60, 68, 62, 59, 55, 53, 56, 58, 63, 62, 62, 59, 65, 70, 67, 66, 65, 64, 64, 64, 62, 58, 59, 61, 62, 66, 68, 68, 66, 64, 69, 70, 69, 71, 71, 72, 75, 74, 75, 74, 74, 80, 77, 71, 68, 70, 73, 74, 75, 76, 75, 74, 77, 77, 88, 150, 209, 207, 212, 212, 210, 209, 212, 212, 211, 211, 210, 211, 211, 211, 210, 210, 211, 212, 210, 210, 211, 212, 211, 211, 211, 211, 211, 211, 211, 211, 211, 211, 211, 211, 211, 210, 211, 212, 211, 209, 209, 211, 211, 211, 211, 211, 210, 212, 211, 211, 212, 212, 212, 212, 212, 212, 212, 212, 213, 213, 213, 213, 212, 212, 212, 212, 212, 213, 212, 213, 212, 213, 212, 211, 211, 211, 211, 211, 211, 210, 211, 209, 190, 150, 120, 96, 104, 75, 34, 96, 81, 72, 110, 126, 99, 99, 120, 94, 89, 123, 125, 101, 137, 121, 77, 65, 92, 106, 70, 90, 59, 115, 143, 116, 95, 50, 51, 36, 43, 48, 44, 63, 73, 99, 120, 169, 203, 187, 176, 154, 153, 200, 192, 154, 163, 191, 177, 207, 206, 207, 206, 208, 208, 207, 207, 207, 209, 209, 210, 211, 211, 211, 211, 211, 211, 211, 211, 211, 211, 211, 209, 210, 211, 210, 212, 212, 212, 212, 212, 212, 212, 212, 212, 210, 210, 209, 209, 210, 210, 210, 210, 210, 210, 210, 210, 210, 210, 210, 210, 210, 210, 212, 209, 203, 64, 64, 64, 59, 58, 67, 62, 57, 58, 59, 58, 60, 61, 61, 71, 73, 69, 61, 65, 67, 68, 63, 60, 62, 62, 62, 63, 63, 61, 62, 61, 64, 65, 65, 65, 62, 66, 69, 65, 69, 67, 66, 66, 65, 66, 68, 69, 73, 74, 74, 72, 72, 73, 73, 76, 81, 80, 79, 81, 81, 81, 144, 208, 210, 212, 210, 209, 209, 212, 214, 211, 211, 211, 211, 211, 211, 211, 211, 211, 210, 210, 210, 211, 211, 211, 211, 211, 211, 211, 211, 211, 212, 212, 212, 212, 211, 211, 211, 210, 211, 213, 211, 211, 211, 211, 211, 211, 210, 210, 210, 210, 210, 211, 212, 212, 212, 212, 213, 212, 212, 212, 212, 212, 213, 213, 211, 211, 211, 211, 211, 208, 211, 210, 212, 212, 212, 212, 212, 212, 210, 209, 210, 210, 209, 86, 133, 173, 182, 137, 100, 33, 74, 127, 80, 98, 125, 134, 119, 93, 166, 131, 112, 127, 150, 64, 52, 24, 15, 25, 36, 28, 61, 87, 96, 47, 31, 25, 34, 29, 31, 19, 22, 20, 34, 34, 32, 116, 151, 181, 184, 137, 168, 134, 154, 126, 89, 141, 129, 165, 183, 195, 207, 206, 208, 207, 207, 207, 207, 209, 209, 210, 211, 211, 211, 211, 211, 211, 211, 211, 211, 211, 211, 211, 212, 212, 212, 212, 212, 212, 212, 212, 212, 212, 212, 212, 210, 210, 209, 209, 210, 210, 210, 210, 210, 210, 210, 210, 210, 210, 210, 210, 210, 210, 214, 209, 209, 199, 79, 67, 55, 62, 63, 63, 59, 53, 59, 60, 62, 68, 70, 71, 72, 70, 62, 61, 64, 62, 61, 61, 60, 58, 60, 63, 62, 59, 59, 63, 58, 63, 63, 62, 64, 64, 64, 67, 71, 67, 67, 69, 66, 62, 65, 68, 69, 70, 70, 71, 73, 73, 73, 73, 77, 78, 79, 81, 82, 84, 131, 207, 211, 213, 211, 209, 209, 211, 214, 211, 211, 211, 211, 211, 211, 211, 211, 211, 211, 211, 210, 209, 209, 211, 211, 211, 211, 211, 211, 211, 212, 212, 212, 212, 211, 211, 211, 209, 210, 212, 212, 211, 211, 211, 211, 211, 212, 212, 211, 211, 211, 211, 212, 212, 211, 211, 212, 211, 211, 212, 212, 212, 214, 214, 213, 213, 213, 213, 212, 210, 212, 211, 212, 212, 212, 212, 212, 212, 210, 210, 210, 210, 209, 194, 144, 135, 101, 125, 167, 147, 58, 72, 115, 109, 162, 133, 79, 119, 141, 170, 146, 196, 143, 124, 94, 21, 43, 27, 35, 22, 23, 18, 31, 68, 105, 63, 50, 49, 38, 55, 48, 41, 40, 53, 118, 83, 124, 164, 139, 143, 118, 132, 166, 125, 131, 158, 180, 184, 200, 205, 208, 210, 208, 207, 207, 207, 207, 209, 209, 210, 210, 210, 210, 210, 211, 211, 212, 212, 211, 210, 210, 211, 211, 209, 209, 212, 212, 212, 212, 212, 212, 212, 212, 212, 210, 211, 209, 209, 210, 209, 210, 210, 210, 210, 210, 210, 210, 210, 209, 209, 210, 210, 211, 208, 210, 204, 100, 67, 66, 64, 65, 63, 62, 60, 54, 61, 73, 71, 68, 69, 71, 66, 63, 63, 66, 67, 67, 59, 56, 59, 61, 61, 59, 56, 61, 62, 60, 65, 66, 68, 68, 67, 67, 66, 69, 68, 69, 69, 67, 69, 67, 71, 71, 70, 69, 69, 70, 74, 76, 76, 80, 81, 80, 81, 82, 84, 116, 204, 210, 213, 211, 209, 209, 211, 212, 211, 211, 211, 211, 211, 211, 211, 212, 212, 212, 212, 212, 211, 211, 211, 211, 211, 211, 211, 211, 211, 212, 212, 212, 212, 211, 211, 212, 212, 211, 211, 211, 212, 212, 211, 211, 211, 211, 211, 210, 210, 211, 212, 212, 211, 210, 210, 211, 211, 211, 212, 212, 213, 214, 215, 214, 214, 213, 213, 213, 212, 212, 213, 212, 212, 212, 211, 211, 212, 210, 209, 210, 210, 210, 112, 142, 150, 166, 188, 152, 187, 109, 65, 91, 96, 105, 95, 155, 168, 141, 149, 146, 89, 124, 94, 70, 68, 137, 118, 59, 20, 28, 61, 46, 58, 73, 81, 82, 77, 58, 43, 45, 46, 49, 53, 34, 49, 42, 114, 134, 173, 177, 161, 166, 102, 134, 154, 167, 184, 193, 198, 208, 206, 207, 207, 207, 207, 208, 209, 209, 209, 210, 210, 209, 210, 210, 210, 211, 211, 210, 210, 210, 211, 212, 211, 211, 212, 212, 211, 212, 212, 212, 212, 212, 212, 210, 210, 210, 210, 210, 209, 209, 210, 210, 210, 210, 210, 210, 210, 209, 209, 210, 210, 211, 207, 209, 206, 103, 70, 71, 63, 71, 62, 61, 62, 73, 69, 65, 65, 64, 63, 59, 60, 64, 61, 65, 63, 63, 63, 64, 62, 60, 60, 61, 61, 64, 62, 63, 64, 66, 65, 64, 66, 67, 67, 68, 69, 70, 69, 69, 70, 69, 67, 68, 69, 71, 71, 74, 73, 71, 71, 77, 79, 77, 79, 76, 83, 101, 198, 210, 211, 212, 210, 209, 211, 212, 210, 210, 210, 210, 210, 211, 211, 212, 212, 211, 212, 212, 212, 212, 211, 210, 210, 211, 210, 210, 211, 212, 212, 211, 211, 211, 211, 211, 212, 212, 212, 212, 212, 212, 211, 211, 212, 212, 212, 212, 211, 212, 212, 212, 212, 211, 211, 211, 212, 212, 213, 213, 213, 214, 214, 213, 214, 213, 213, 213, 213, 213, 213, 212, 212, 212, 211, 211, 211, 210, 210, 210, 210, 210, 195, 196, 172, 191, 183, 153, 98, 86, 51, 65, 100, 90, 84, 133, 136, 106, 103, 174, 167, 119, 100, 127, 98, 93, 87, 54, 31, 112, 93, 65, 44, 66, 68, 66, 75, 85, 114, 114, 139, 128, 102, 75, 105, 69, 150, 210, 200, 172, 159, 135, 104, 149, 178, 194, 205, 199, 191, 208, 207, 206, 207, 207, 207, 207, 209, 209, 209, 209, 209, 209, 210, 210, 210, 210, 210, 210, 210, 211, 211, 211, 211, 212, 212, 212, 212, 212, 212, 212, 212, 212, 212, 210, 210, 210, 210, 210, 210, 210, 210, 210, 210, 210, 210, 210, 210, 209, 209, 210, 210, 211, 211, 207, 205, 106, 73, 64, 61, 69, 64, 64, 64, 57, 55, 58, 67, 70, 61, 60, 67, 69, 67, 60, 57, 59, 52, 59, 65, 65, 63, 63, 63, 62, 66, 65, 64, 64, 64, 65, 64, 66, 68, 69, 66, 68, 68, 71, 70, 68, 70, 71, 71, 75, 74, 75, 72, 73, 75, 77, 77, 79, 81, 78, 77, 91, 182, 209, 212, 212, 210, 210, 211, 211, 210, 211, 211, 211, 211, 211, 211, 211, 212, 211, 212, 212, 212, 212, 211, 210, 210, 211, 212, 211, 211, 211, 212, 212, 211, 211, 211, 212, 212, 212, 212, 212, 212, 212, 212, 211, 211, 211, 212, 213, 213, 213, 213, 214, 213, 212, 212, 211, 212, 212, 214, 214, 214, 214, 214, 214, 214, 213, 213, 212, 213, 213, 213, 213, 212, 212, 211, 211, 210, 210, 211, 211, 210, 210, 175, 173, 179, 188, 197, 151, 126, 161, 173, 132, 114, 138, 70, 64, 128, 173, 167, 142, 114, 85, 155, 144, 56, 65, 94, 92, 72, 84, 132, 95, 100, 85, 121, 157, 106, 155, 124, 87, 68, 78, 110, 182, 154, 71, 103, 169, 173, 161, 151, 116, 99, 172, 188, 187, 183, 175, 190, 195, 188, 207, 206, 206, 207, 209, 209, 210, 210, 209, 209, 210, 210, 210, 210, 210, 210, 210, 210, 210, 210, 210, 211, 212, 211, 212, 212, 211, 211, 211, 211, 212, 212, 210, 210, 210, 210, 210, 210, 210, 210, 210, 209, 209, 209, 209, 209, 209, 209, 210, 210, 212, 210, 209, 204, 106, 81, 70, 61, 62, 72, 69, 62, 69, 64, 67, 70, 64, 57, 63, 63, 56, 60, 58, 55, 44, 51, 58, 57, 59, 61, 61, 62, 60, 62, 64, 65, 67, 71, 64, 51, 56, 65, 63, 66, 69, 62, 67, 73, 70, 69, 70, 71, 74, 78, 79, 78, 75, 70, 73, 73, 80, 80, 78, 82, 89, 158, 207, 212, 211, 211, 209, 210, 211, 211, 211, 211, 211, 210, 211, 211, 211, 211, 211, 212, 212, 212, 212, 211, 211, 211, 211, 212, 212, 211, 211, 212, 212, 212, 212, 212, 212, 212, 212, 212, 212, 212, 212, 212, 212, 211, 211, 212, 213, 213, 213, 213, 212, 211, 211, 212, 211, 213, 214, 214, 214, 214, 214, 214, 214, 214, 213, 213, 211, 212, 213, 213, 213, 212, 212, 211, 212, 210, 211, 211, 211, 210, 210, 112, 136, 128, 131, 159, 196, 176, 143, 142, 125, 91, 68, 148, 177, 132, 107, 128, 164, 80, 58, 49, 67, 48, 58, 78, 148, 100, 112, 115, 136, 146, 136, 134, 130, 131, 90, 79, 70, 103, 160, 152, 123, 131, 94, 170, 144, 156, 173, 180, 69, 145, 186, 171, 163, 170, 171, 163, 189, 206, 209, 209, 209, 208, 207, 209, 210, 210, 208, 210, 210, 211, 210, 210, 210, 210, 210, 210, 210, 210, 210, 210, 211, 210, 212, 212, 211, 210, 210, 211, 212, 212, 210, 210, 210, 210, 210, 210, 210, 210, 210, 209, 209, 209, 209, 209, 210, 209, 210, 210, 213, 209, 211, 205, 104, 81, 68, 53, 68, 73, 67, 69, 67, 67, 70, 67, 65, 61, 67, 63, 60, 60, 61, 59, 60, 58, 60, 68, 66, 64, 66, 67, 66, 65, 66, 68, 67, 66, 69, 68, 72, 64, 58, 51, 50, 70, 70, 69, 71, 71, 73, 71, 70, 77, 77, 76, 78, 77, 73, 72, 74, 79, 77, 83, 91, 137, 206, 209, 213, 210, 210, 211, 211, 211, 211, 211, 210, 210, 211, 211, 211, 211, 211, 211, 212, 212, 212, 211, 212, 212, 212, 211, 211, 211, 212, 213, 213, 213, 212, 212, 212, 212, 212, 212, 212, 212, 212, 212, 212, 212, 213, 212, 212, 211, 211, 213, 213, 213, 213, 213, 212, 213, 214, 214, 214, 214, 214, 214, 214, 214, 213, 213, 211, 212, 212, 212, 212, 211, 210, 210, 211, 211, 211, 210, 211, 211, 211, 115, 149, 146, 104, 127, 70, 42, 39, 102, 112, 145, 126, 116, 172, 175, 200, 126, 47, 90, 112, 105, 92, 72, 58, 126, 187, 105, 115, 139, 130, 161, 164, 117, 88, 98, 79, 109, 157, 186, 191, 177, 170, 103, 95, 148, 159, 175, 189, 180, 47, 54, 93, 143, 159, 179, 196, 197, 201, 201, 193, 193, 196, 201, 207, 210, 209, 209, 210, 210, 210, 210, 210, 209, 210, 210, 210, 210, 208, 208, 209, 209, 208, 211, 211, 211, 211, 211, 211, 212, 212, 212, 212, 212, 212, 212, 212, 212, 212, 212, 212, 209, 209, 209, 209, 209, 210, 210, 210, 210, 210, 209, 208, 206, 109, 74, 62, 44, 65, 73, 72, 70, 69, 69, 67, 63, 62, 64, 63, 63, 66, 63, 62, 64, 65, 64, 71, 72, 65, 65, 67, 68, 67, 66, 68, 68, 67, 69, 69, 68, 72, 73, 70, 68, 68, 69, 74, 72, 68, 59, 46, 52, 62, 72, 73, 77, 78, 81, 80, 76, 72, 69, 72, 77, 91, 122, 210, 210, 211, 210, 209, 209, 211, 211, 211, 211, 210, 210, 211, 211, 211, 211, 211, 211, 211, 211, 211, 211, 211, 212, 212, 209, 211, 212, 211, 211, 213, 213, 213, 213, 212, 212, 212, 212, 212, 212, 212, 212, 213, 212, 212, 212, 212, 212, 211, 213, 213, 214, 214, 213, 213, 214, 214, 213, 214, 214, 214, 214, 213, 214, 214, 214, 214, 215, 215, 214, 212, 211, 210, 210, 211, 211, 211, 211, 211, 211, 212, 152, 113, 110, 114, 109, 73, 94, 138, 119, 70, 112, 186, 173, 173, 176, 104, 101, 60, 154, 112, 141, 146, 70, 88, 180, 176, 156, 134, 145, 126, 135, 121, 120, 127, 99, 129, 166, 192, 185, 178, 191, 159, 187, 201, 157, 125, 147, 206, 122, 111, 85, 86, 101, 123, 139, 164, 177, 189, 193, 191, 187, 189, 205, 211, 209, 207, 209, 210, 211, 211, 211, 210, 210, 210, 210, 210, 210, 208, 208, 209, 209, 209, 212, 212, 212, 212, 212, 212, 212, 212, 212, 212, 212, 212, 212, 212, 212, 212, 212, 212, 210, 210, 210, 210, 210, 210, 210, 210, 210, 210, 209, 209, 206, 110, 71, 54, 43, 67, 71, 73, 70, 71, 64, 62, 63, 62, 65, 68, 68, 66, 60, 61, 61, 62, 66, 68, 68, 66, 64, 65, 66, 68, 66, 67, 66, 64, 65, 68, 65, 69, 75, 68, 68, 74, 74, 74, 72, 73, 74, 69, 67, 62, 69, 74, 71, 74, 77, 77, 76, 76, 73, 74, 80, 85, 114, 211, 210, 211, 210, 208, 210, 211, 212, 212, 212, 211, 211, 212, 212, 212, 212, 212, 212, 212, 212, 212, 212, 212, 211, 211, 211, 212, 213, 212, 213, 214, 213, 212, 211, 212, 212, 212, 212, 212, 211, 212, 212, 213, 212, 212, 213, 213, 214, 213, 213, 213, 213, 214, 214, 214, 214, 214, 214, 214, 214, 214, 214, 213, 214, 214, 214, 215, 215, 215, 214, 213, 211, 211, 211, 211, 212, 212, 212, 212, 212, 212, 144, 90, 85, 52, 95, 111, 124, 114, 155, 144, 73, 121, 158, 170, 123, 141, 41, 109, 182, 136, 134, 152, 80, 119, 169, 177, 147, 107, 114, 114, 112, 121, 129, 145, 161, 190, 178, 191, 182, 190, 138, 178, 208, 205, 189, 172, 118, 70, 149, 160, 194, 175, 127, 95, 138, 168, 173, 169, 167, 166, 172, 191, 201, 208, 210, 211, 209, 209, 211, 211, 211, 210, 210, 209, 210, 210, 209, 208, 208, 209, 209, 209, 212, 212, 212, 212, 212, 212, 212, 212, 212, 212, 212, 212, 212, 212, 212, 212, 212, 212, 210, 210, 210, 210, 210, 210, 210, 210, 210, 210, 209, 208, 205, 107, 64, 50, 38, 59, 68, 67, 71, 68, 60, 63, 63, 67, 68, 66, 61, 61, 60, 62, 61, 61, 65, 66, 65, 66, 67, 67, 69, 68, 67, 65, 63, 64, 66, 67, 67, 66, 64, 68, 61, 63, 69, 73, 73, 73, 73, 72, 71, 70, 68, 72, 71, 70, 71, 77, 79, 79, 78, 75, 76, 87, 103, 208, 208, 210, 209, 208, 210, 213, 212, 212, 212, 212, 211, 211, 212, 212, 212, 212, 212, 212, 212, 212, 212, 212, 211, 211, 212, 212, 211, 211, 212, 214, 214, 214, 214, 212, 212, 212, 212, 212, 212, 212, 214, 214, 213, 213, 214, 214, 214, 214, 214, 212, 213, 214, 214, 215, 215, 215, 215, 214, 214, 214, 214, 213, 214, 215, 215, 215, 215, 215, 214, 214, 212, 212, 212, 212, 212, 212, 212, 212, 212, 212, 27, 22, 55, 59, 103, 156, 86, 58, 98, 159, 188, 120, 110, 128, 121, 34, 119, 173, 82, 127, 155, 158, 81, 148, 134, 81, 105, 119, 123, 119, 108, 127, 141, 160, 189, 175, 194, 177, 139, 119, 197, 206, 193, 196, 199, 189, 110, 135, 161, 124, 171, 191, 154, 132, 105, 112, 128, 103, 135, 196, 200, 197, 201, 210, 211, 209, 190, 203, 209, 211, 210, 211, 211, 209, 209, 209, 208, 208, 209, 209, 209, 209, 212, 212, 212, 211, 211, 212, 211, 211, 210, 211, 211, 211, 211, 211, 211, 211, 211, 211, 209, 210, 210, 209, 207, 209, 210, 210, 210, 210, 207, 208, 205, 104, 53, 46, 42, 61, 65, 69, 76, 70, 64, 66, 69, 65, 58, 58, 61, 64, 65, 65, 62, 65, 66, 68, 68, 67, 62, 61, 61, 63, 58, 58, 61, 62, 59, 61, 67, 69, 69, 71, 71, 72, 67, 66, 65, 68, 68, 70, 68, 70, 68, 73, 70, 72, 71, 77, 81, 80, 78, 83, 79, 80, 94, 195, 208, 208, 210, 210, 210, 211, 211, 211, 211, 211, 212, 212, 212, 212, 212, 212, 211, 211, 211, 213, 212, 212, 212, 212, 210, 210, 212, 213, 214, 214, 214, 214, 214, 214, 212, 212, 212, 211, 212, 213, 214, 213, 213, 214, 213, 213, 214, 214, 214, 214, 214, 214, 215, 216, 217, 217, 216, 216, 215, 215, 215, 214, 214, 214, 214, 214, 214, 214, 213, 213, 211, 212, 212, 211, 212, 212, 212, 212, 212, 212, 113, 70, 90, 111, 148, 152, 114, 125, 107, 164, 153, 159, 70, 24, 17, 60, 114, 133, 110, 153, 99, 94, 105, 51, 51, 84, 90, 79, 100, 111, 67, 103, 103, 80, 48, 75, 68, 67, 119, 107, 166, 153, 178, 187, 202, 143, 171, 130, 160, 161, 133, 93, 120, 178, 193, 164, 152, 113, 84, 94, 142, 166, 200, 206, 209, 178, 188, 201, 209, 212, 210, 211, 210, 209, 209, 209, 209, 209, 211, 211, 211, 211, 212, 212, 212, 211, 211, 212, 211, 211, 211, 211, 211, 212, 211, 211, 211, 211, 211, 211, 210, 210, 210, 208, 208, 209, 210, 210, 210, 210, 208, 208, 204, 104, 63, 51, 37, 65, 74, 69, 74, 78, 73, 71, 60, 58, 62, 62, 62, 64, 65, 66, 58, 55, 56, 59, 56, 56, 59, 59, 59, 60, 58, 61, 61, 60, 62, 63, 65, 68, 67, 70, 70, 70, 69, 67, 69, 69, 68, 69, 64, 68, 66, 65, 65, 68, 72, 72, 79, 82, 77, 76, 77, 80, 91, 177, 207, 210, 210, 209, 210, 212, 211, 211, 211, 212, 212, 212, 212, 212, 212, 212, 211, 211, 212, 213, 212, 212, 212, 212, 214, 214, 213, 213, 213, 214, 214, 214, 214, 214, 212, 212, 213, 212, 212, 213, 214, 213, 214, 215, 215, 215, 215, 215, 215, 215, 215, 215, 216, 216, 216, 216, 216, 216, 215, 215, 215, 214, 214, 214, 214, 214, 214, 214, 214, 214, 212, 212, 212, 211, 212, 212, 212, 212, 212, 212, 122, 121, 83, 42, 103, 144, 112, 139, 117, 139, 166, 122, 51, 59, 119, 187, 190, 199, 130, 138, 109, 67, 48, 66, 107, 73, 56, 38, 42, 56, 65, 51, 82, 82, 76, 88, 29, 58, 134, 146, 108, 143, 163, 143, 96, 139, 127, 113, 57, 83, 89, 93, 81, 99, 125, 147, 182, 183, 182, 140, 143, 167, 201, 208, 169, 184, 199, 213, 210, 211, 208, 210, 212, 209, 209, 209, 209, 209, 210, 210, 210, 210, 212, 212, 212, 211, 211, 212, 212, 211, 211, 211, 212, 212, 212, 211, 211, 211, 211, 211, 210, 210, 210, 209, 209, 210, 210, 210, 210, 210, 210, 210, 203, 103, 69, 58, 41, 65, 70, 72, 73, 74, 71, 63, 66, 62, 60, 62, 64, 63, 61, 60, 63, 63, 60, 57, 56, 57, 58, 58, 59, 64, 62, 62, 62, 64, 63, 62, 65, 66, 67, 69, 71, 71, 73, 71, 73, 73, 70, 70, 67, 69, 70, 71, 67, 67, 69, 71, 74, 79, 81, 79, 77, 79, 90, 155, 209, 211, 209, 207, 211, 213, 212, 212, 211, 212, 212, 212, 212, 212, 212, 212, 212, 211, 212, 213, 212, 212, 212, 213, 214, 214, 213, 213, 213, 214, 214, 214, 214, 214, 213, 213, 213, 213, 214, 214, 214, 215, 215, 216, 217, 216, 216, 216, 216, 215, 216, 217, 217, 215, 215, 216, 216, 216, 215, 215, 215, 214, 214, 214, 214, 214, 213, 213, 213, 213, 211, 212, 212, 211, 212, 212, 212, 212, 212, 212, 37, 48, 41, 20, 60, 120, 70, 118, 102, 84, 32, 158, 204, 147, 106, 196, 177, 171, 160, 195, 186, 99, 127, 110, 52, 46, 92, 112, 107, 105, 96, 89, 121, 111, 122, 58, 68, 100, 109, 147, 148, 103, 88, 110, 160, 151, 129, 49, 132, 172, 158, 116, 94, 128, 149, 136, 148, 162, 181, 194, 204, 187, 202, 162, 166, 191, 209, 203, 205, 210, 211, 212, 211, 208, 208, 210, 210, 210, 212, 212, 212, 212, 212, 212, 212, 211, 212, 212, 212, 211, 211, 212, 212, 212, 212, 212, 212, 212, 212, 212, 210, 210, 209, 210, 210, 210, 211, 210, 210, 210, 211, 210, 203, 103, 68, 56, 47, 71, 71, 68, 62, 63, 62, 64, 65, 65, 69, 70, 67, 65, 64, 67, 66, 57, 60, 57, 57, 60, 62, 58, 58, 62, 63, 62, 62, 64, 68, 68, 69, 76, 74, 70, 72, 71, 71, 69, 70, 74, 70, 72, 74, 72, 67, 68, 73, 68, 63, 70, 74, 74, 77, 82, 75, 79, 86, 134, 206, 208, 208, 208, 212, 213, 212, 212, 211, 212, 212, 212, 212, 212, 212, 213, 212, 212, 212, 213, 212, 212, 212, 213, 211, 211, 212, 213, 214, 214, 214, 214, 214, 214, 213, 213, 214, 214, 215, 214, 214, 215, 215, 216, 215, 215, 216, 216, 215, 214, 216, 216, 216, 215, 216, 217, 216, 216, 215, 215, 215, 214, 214, 214, 214, 213, 212, 212, 212, 212, 209, 210, 211, 211, 211, 211, 211, 211, 211, 211, 43, 25, 17, 34, 56, 28, 26, 21, 39, 130, 179, 190, 192, 194, 198, 118, 179, 176, 191, 188, 178, 76, 168, 142, 109, 104, 79, 105, 105, 98, 129, 127, 104, 97, 45, 40, 63, 55, 78, 68, 82, 146, 117, 155, 177, 172, 119, 76, 78, 127, 174, 165, 161, 158, 164, 170, 160, 172, 148, 186, 173, 198, 161, 159, 161, 198, 197, 202, 207, 210, 207, 208, 209, 209, 209, 210, 211, 210, 212, 212, 212, 212, 212, 212, 212, 212, 210, 210, 210, 210, 209, 212, 212, 212, 212, 212, 212, 212, 212, 212, 210, 210, 210, 210, 210, 210, 210, 210, 210, 214, 212, 212, 206, 96, 69, 54, 53, 73, 68, 64, 63, 68, 65, 62, 60, 63, 67, 66, 65, 60, 55, 57, 61, 63, 62, 65, 64, 62, 62, 66, 66, 67, 65, 66, 66, 68, 66, 68, 68, 68, 73, 73, 73, 75, 76, 71, 71, 74, 73, 70, 73, 73, 72, 74, 75, 77, 74, 64, 66, 69, 74, 73, 77, 84, 87, 111, 206, 210, 211, 212, 211, 211, 212, 212, 212, 212, 212, 212, 212, 212, 212, 212, 212, 213, 213, 214, 213, 213, 213, 213, 213, 214, 214, 215, 215, 217, 217, 217, 216, 216, 216, 217, 217, 216, 216, 215, 215, 216, 215, 215, 215, 217, 216, 215, 215, 215, 215, 214, 214, 215, 215, 217, 216, 216, 215, 215, 215, 214, 214, 214, 213, 213, 213, 212, 212, 212, 212, 212, 213, 213, 212, 210, 209, 211, 211, 211, 27, 28, 15, 13, 10, 31, 23, 51, 50, 43, 102, 203, 202, 202, 204, 191, 190, 132, 164, 190, 198, 134, 111, 156, 105, 113, 128, 118, 115, 142, 149, 121, 73, 69, 38, 55, 93, 103, 87, 123, 116, 111, 135, 114, 142, 140, 180, 147, 90, 118, 120, 113, 115, 156, 171, 166, 186, 198, 172, 159, 192, 196, 144, 131, 173, 198, 197, 194, 193, 203, 206, 207, 209, 210, 209, 209, 209, 209, 210, 212, 212, 212, 212, 211, 211, 211, 211, 209, 209, 209, 209, 209, 212, 212, 212, 212, 212, 212, 212, 212, 212, 210, 210, 210, 210, 210, 210, 210, 210, 210, 211, 212, 212, 206, 101, 71, 59, 53, 73, 64, 62, 67, 60, 61, 58, 56, 65, 64, 64, 63, 59, 59, 59, 58, 61, 62, 64, 65, 62, 65, 66, 66, 66, 65, 66, 66, 69, 69, 68, 69, 70, 71, 73, 72, 71, 69, 66, 69, 71, 71, 71, 74, 78, 75, 70, 76, 74, 73, 74, 68, 68, 73, 78, 79, 82, 87, 95, 200, 209, 212, 213, 211, 212, 212, 212, 212, 212, 212, 212, 212, 212, 213, 213, 213, 213, 214, 214, 214, 214, 214, 215, 215, 215, 215, 215, 215, 216, 217, 216, 216, 217, 218, 218, 216, 214, 215, 215, 215, 216, 216, 216, 216, 216, 217, 217, 216, 215, 215, 215, 214, 214, 213, 216, 216, 216, 215, 215, 215, 214, 214, 214, 213, 213, 213, 213, 212, 212, 212, 212, 212, 212, 211, 211, 211, 211, 211, 211, 13, 10, 21, 71, 62, 32, 115, 119, 118, 117, 173, 109, 187, 205, 204, 169, 205, 182, 116, 193, 169, 109, 87, 191, 101, 118, 124, 207, 134, 158, 143, 122, 47, 36, 49, 27, 38, 90, 133, 145, 121, 120, 112, 130, 144, 152, 151, 152, 91, 72, 110, 91, 78, 146, 187, 154, 171, 175, 157, 160, 173, 158, 127, 167, 193, 178, 154, 195, 206, 208, 210, 209, 209, 206, 210, 210, 210, 209, 210, 212, 212, 212, 212, 211, 211, 211, 211, 209, 209, 209, 209, 210, 212, 212, 212, 212, 212, 212, 212, 212, 212, 210, 210, 210, 210, 210, 210, 210, 210, 210, 210, 209, 209, 203, 96, 76, 64, 54, 63, 64, 65, 65, 62, 65, 63, 65, 65, 64, 62, 60, 59, 62, 62, 63, 65, 66, 65, 65, 60, 65, 65, 65, 69, 68, 70, 68, 70, 69, 68, 69, 68, 69, 70, 72, 72, 74, 73, 73, 73, 73, 76, 75, 75, 79, 84, 80, 76, 76, 74, 73, 72, 74, 82, 80, 80, 87, 93, 190, 211, 212, 215, 211, 212, 212, 212, 211, 211, 211, 212, 212, 212, 213, 214, 214, 214, 214, 214, 214, 215, 215, 216, 214, 215, 216, 216, 215, 216, 216, 216, 216, 217, 217, 217, 216, 215, 215, 215, 215, 216, 216, 217, 217, 216, 217, 217, 217, 216, 215, 215, 215, 215, 214, 214, 216, 216, 215, 215, 215, 214, 214, 213, 212, 213, 213, 213, 213, 213, 212, 212, 212, 212, 210, 211, 211, 211, 212, 213, 59, 21, 55, 116, 134, 53, 79, 96, 145, 187, 205, 188, 147, 183, 186, 196, 166, 169, 96, 108, 119, 102, 163, 152, 126, 135, 196, 175, 123, 81, 86, 131, 106, 54, 77, 98, 101, 81, 75, 69, 115, 78, 95, 148, 126, 139, 123, 98, 110, 101, 116, 65, 100, 133, 156, 163, 181, 129, 189, 155, 104, 135, 160, 141, 183, 199, 207, 193, 181, 178, 180, 184, 205, 207, 211, 208, 208, 210, 212, 213, 212, 212, 212, 212, 212, 212, 211, 210, 210, 210, 210, 213, 212, 212, 212, 212, 212, 212, 212, 213, 211, 211, 211, 210, 210, 210, 210, 210, 210, 209, 208, 208, 205, 96, 78, 51, 41, 58, 64, 69, 66, 67, 62, 62, 66, 64, 65, 65, 62, 64, 63, 63, 61, 61, 61, 62, 61, 66, 65, 66, 66, 68, 68, 68, 66, 65, 66, 65, 66, 67, 72, 68, 70, 70, 66, 72, 74, 75, 76, 78, 77, 77, 74, 76, 78, 76, 74, 73, 76, 75, 76, 78, 81, 78, 79, 90, 186, 209, 212, 214, 213, 211, 212, 212, 211, 211, 211, 211, 211, 212, 213, 214, 214, 214, 214, 214, 214, 214, 215, 216, 217, 217, 216, 216, 217, 216, 216, 217, 217, 216, 216, 216, 216, 218, 218, 218, 217, 216, 217, 217, 217, 218, 216, 215, 215, 215, 214, 215, 216, 214, 214, 215, 216, 216, 215, 215, 215, 215, 214, 213, 212, 213, 212, 213, 213, 212, 213, 214, 212, 212, 211, 212, 212, 211, 212, 212, 98, 105, 11, 20, 83, 149, 95, 73, 140, 176, 201, 213, 212, 180, 145, 166, 131, 96, 115, 69, 122, 123, 183, 165, 136, 131, 196, 116, 94, 118, 118, 117, 125, 136, 122, 81, 129, 141, 122, 84, 143, 129, 125, 146, 143, 115, 157, 120, 108, 104, 91, 85, 112, 93, 142, 149, 125, 121, 167, 104, 88, 149, 181, 169, 144, 139, 153, 172, 181, 195, 200, 206, 204, 209, 209, 209, 207, 209, 212, 212, 212, 212, 212, 212, 212, 212, 210, 210, 210, 210, 211, 213, 212, 212, 212, 212, 211, 211, 212, 212, 213, 213, 212, 212, 212, 212, 212, 212, 212, 211, 211, 210, 205, 93, 75, 54, 38, 63, 65, 62, 62, 64, 58, 61, 64, 62, 62, 63, 63, 64, 62, 65, 66, 64, 62, 65, 65, 64, 61, 64, 62, 62, 64, 65, 64, 63, 63, 61, 62, 64, 64, 59, 61, 63, 62, 68, 69, 71, 73, 73, 73, 77, 77, 75, 75, 72, 75, 78, 80, 77, 75, 77, 78, 78, 81, 84, 174, 208, 212, 214, 213, 212, 212, 212, 212, 211, 211, 212, 213, 214, 214, 214, 214, 214, 214, 214, 214, 215, 216, 216, 217, 217, 217, 218, 216, 215, 215, 216, 216, 216, 216, 216, 216, 216, 216, 219, 219, 219, 218, 217, 217, 217, 216, 215, 215, 215, 215, 214, 214, 215, 216, 215, 215, 214, 214, 214, 214, 214, 214, 213, 212, 213, 212, 213, 213, 212, 213, 213, 212, 212, 211, 212, 212, 211, 212, 211, 88, 127, 49, 48, 39, 39, 129, 129, 53, 70, 92, 105, 115, 80, 111, 113, 73, 98, 135, 147, 98, 100, 168, 163, 147, 77, 60, 178, 160, 88, 159, 148, 159, 172, 134, 108, 143, 142, 93, 100, 135, 133, 135, 128, 174, 187, 183, 149, 80, 100, 101, 106, 70, 112, 120, 81, 78, 124, 175, 87, 31, 90, 141, 162, 182, 202, 212, 206, 206, 193, 198, 203, 210, 203, 205, 211, 208, 210, 211, 212, 212, 212, 212, 212, 212, 212, 210, 210, 210, 210, 211, 213, 212, 212, 212, 212, 211, 211, 212, 213, 212, 212, 212, 212, 212, 212, 212, 212, 212, 216, 213, 211, 205, 94, 66, 50, 37, 66, 65, 61, 66, 64, 61, 57, 58, 63, 59, 58, 63, 63, 63, 66, 62, 59, 58, 59, 57, 56, 59, 62, 59, 59, 60, 62, 62, 62, 62, 63, 64, 64, 66, 63, 63, 63, 61, 65, 66, 64, 64, 69, 70, 69, 73, 78, 79, 77, 78, 75, 76, 75, 74, 74, 76, 74, 81, 91, 156, 211, 212, 214, 213, 212, 212, 212, 212, 212, 212, 213, 214, 214, 214, 214, 214, 214, 214, 214, 215, 215, 216, 216, 217, 217, 216, 215, 215, 214, 214, 215, 215, 216, 216, 216, 217, 217, 217, 219, 219, 220, 219, 217, 218, 218, 217, 216, 215, 214, 215, 214, 215, 215, 215, 215, 215, 214, 214, 214, 214, 215, 214, 213, 213, 213, 212, 213, 213, 212, 212, 212, 213, 213, 211, 212, 212, 211, 212, 212, 124, 126, 145, 53, 86, 86, 34, 122, 151, 142, 208, 206, 199, 164, 152, 141, 139, 106, 81, 58, 82, 39, 55, 54, 58, 71, 119, 177, 191, 185, 156, 176, 189, 173, 173, 144, 165, 150, 81, 110, 105, 61, 75, 111, 135, 140, 144, 99, 63, 114, 95, 59, 30, 62, 109, 110, 99, 73, 70, 105, 107, 80, 124, 153, 152, 172, 169, 188, 189, 197, 207, 201, 206, 205, 201, 211, 210, 209, 210, 211, 211, 212, 212, 210, 212, 212, 210, 211, 211, 211, 211, 213, 212, 212, 212, 212, 212, 212, 213, 214, 211, 211, 211, 211, 211, 211, 211, 211, 211, 213, 212, 211, 205, 94, 65, 55, 40, 57, 59, 60, 63, 57, 63, 61, 61, 62, 61, 61, 64, 64, 63, 59, 62, 61, 62, 62, 59, 61, 59, 58, 57, 60, 60, 60, 62, 63, 64, 64, 65, 64, 65, 63, 64, 64, 63, 63, 65, 62, 64, 67, 73, 71, 71, 72, 76, 77, 76, 75, 77, 76, 76, 71, 74, 74, 82, 87, 129, 213, 213, 214, 213, 211, 212, 212, 212, 212, 212, 212, 213, 214, 213, 214, 214, 214, 214, 214, 215, 215, 216, 216, 217, 217, 217, 218, 217, 216, 215, 216, 216, 217, 217, 217, 217, 217, 218, 219, 219, 219, 220, 220, 219, 218, 215, 215, 214, 215, 215, 216, 216, 214, 214, 214, 215, 214, 214, 214, 214, 214, 214, 213, 212, 213, 212, 213, 213, 212, 212, 212, 213, 213, 212, 212, 212, 212, 212, 212, 124, 119, 184, 125, 69, 121, 152, 117, 51, 77, 183, 171, 185, 146, 126, 156, 86, 39, 63, 86, 86, 46, 37, 60, 113, 109, 133, 192, 213, 207, 172, 186, 194, 202, 164, 153, 170, 177, 114, 61, 43, 87, 77, 144, 170, 174, 159, 136, 113, 50, 54, 52, 48, 91, 126, 82, 48, 39, 74, 130, 143, 169, 147, 88, 117, 145, 148, 128, 167, 196, 190, 182, 186, 194, 207, 210, 208, 210, 210, 209, 206, 209, 210, 208, 214, 210, 213, 212, 212, 212, 212, 212, 212, 213, 212, 212, 212, 212, 212, 212, 210, 210, 210, 210, 210, 210, 210, 211, 210, 211, 208, 207, 201, 92, 70, 60, 44, 54, 55, 59, 55, 57, 60, 61, 63, 62, 66, 63, 63, 63, 63, 62, 62, 64, 63, 63, 61, 60, 58, 60, 60, 63, 60, 58, 61, 64, 63, 67, 66, 65, 64, 64, 65, 63, 65, 66, 66, 67, 67, 69, 70, 70, 69, 69, 68, 69, 74, 77, 73, 75, 76, 73, 72, 78, 79, 83, 107, 209, 214, 214, 211, 209, 212, 212, 212, 212, 212, 212, 213, 214, 214, 214, 214, 214, 214, 215, 216, 216, 217, 217, 217, 217, 217, 217, 216, 217, 218, 219, 219, 218, 219, 219, 219, 218, 219, 219, 219, 219, 219, 219, 220, 220, 218, 217, 216, 217, 217, 215, 215, 216, 215, 213, 214, 213, 214, 215, 215, 215, 214, 214, 214, 213, 212, 212, 213, 212, 212, 212, 212, 212, 212, 212, 212, 212, 212, 212, 95, 98, 125, 122, 57, 127, 166, 186, 197, 110, 37, 96, 97, 32, 81, 75, 35, 31, 14, 15, 56, 26, 113, 183, 172, 173, 107, 166, 151, 109, 157, 189, 211, 210, 202, 194, 140, 171, 75, 77, 54, 81, 107, 171, 154, 82, 68, 112, 79, 33, 40, 24, 58, 85, 87, 172, 134, 78, 42, 68, 132, 147, 134, 133, 172, 130, 84, 160, 207, 160, 158, 172, 177, 194, 212, 209, 215, 201, 210, 198, 201, 207, 208, 203, 205, 212, 211, 212, 212, 212, 212, 212, 212, 213, 212, 212, 212, 212, 212, 212, 210, 210, 210, 210, 210, 210, 210, 211, 211, 212, 210, 209, 203, 93, 72, 60, 48, 59, 58, 57, 57, 57, 62, 62, 62, 61, 63, 62, 62, 59, 61, 62, 65, 69, 66, 63, 59, 57, 57, 61, 62, 60, 60, 60, 63, 65, 67, 68, 68, 65, 74, 66, 67, 67, 67, 68, 65, 64, 65, 69, 69, 70, 72, 72, 71, 71, 68, 69, 70, 75, 76, 78, 77, 76, 75, 86, 94, 199, 212, 214, 213, 210, 212, 212, 212, 212, 212, 212, 213, 214, 214, 213, 214, 214, 215, 215, 216, 217, 217, 218, 219, 218, 218, 218, 217, 217, 218, 220, 219, 220, 220, 221, 219, 219, 218, 219, 218, 218, 217, 218, 219, 219, 217, 216, 216, 216, 216, 215, 215, 214, 215, 216, 215, 214, 215, 215, 214, 215, 214, 214, 214, 213, 212, 212, 212, 212, 213, 213, 213, 213, 212, 212, 212, 213, 213, 212, 96, 136, 161, 169, 164, 54, 172, 147, 153, 172, 144, 46, 48, 62, 64, 41, 65, 58, 103, 104, 136, 127, 74, 144, 167, 168, 153, 152, 166, 169, 199, 165, 167, 159, 145, 143, 111, 136, 146, 122, 92, 62, 73, 48, 82, 57, 47, 82, 81, 70, 119, 65, 57, 74, 91, 77, 114, 110, 118, 79, 81, 105, 142, 145, 164, 170, 179, 140, 127, 108, 121, 133, 144, 201, 201, 205, 195, 202, 176, 202, 198, 190, 177, 192, 192, 211, 213, 212, 212, 212, 212, 212, 212, 213, 212, 212, 212, 212, 212, 212, 210, 210, 210, 210, 210, 210, 210, 211, 210, 213, 211, 209, 205, 96, 72, 59, 49, 57, 57, 61, 59, 63, 60, 58, 59, 60, 62, 62, 64, 63, 65, 65, 65, 64, 65, 67, 65, 64, 65, 67, 67, 66, 67, 67, 64, 65, 70, 71, 67, 62, 51, 45, 51, 66, 78, 79, 77, 76, 75, 70, 73, 73, 70, 70, 72, 73, 75, 73, 70, 69, 73, 73, 77, 78, 77, 85, 95, 188, 212, 214, 213, 210, 213, 213, 213, 213, 212, 212, 213, 214, 214, 213, 214, 214, 215, 215, 215, 216, 217, 218, 218, 218, 218, 220, 219, 218, 218, 219, 219, 219, 220, 219, 217, 217, 218, 218, 217, 217, 217, 217, 217, 218, 217, 217, 215, 215, 216, 215, 215, 215, 215, 214, 215, 214, 215, 215, 215, 215, 214, 214, 214, 214, 212, 212, 212, 211, 211, 211, 211, 211, 211, 212, 213, 213, 214, 212, 120, 184, 138, 142, 156, 148, 60, 170, 131, 120, 125, 77, 186, 132, 49, 44, 126, 70, 84, 157, 137, 139, 158, 88, 124, 177, 176, 185, 179, 183, 185, 183, 190, 193, 189, 186, 189, 131, 49, 77, 82, 118, 119, 133, 161, 158, 58, 67, 101, 96, 30, 99, 132, 114, 100, 123, 121, 148, 134, 163, 133, 125, 111, 143, 187, 186, 182, 203, 188, 148, 186, 118, 142, 205, 196, 200, 193, 172, 198, 191, 165, 181, 191, 202, 211, 212, 212, 212, 212, 212, 212, 212, 212, 212, 212, 212, 212, 212, 212, 212, 210, 210, 210, 210, 210, 210, 210, 211, 211, 213, 212, 210, 207, 98, 70, 63, 52, 63, 61, 59, 64, 62, 60, 59, 61, 63, 64, 64, 63, 61, 64, 64, 65, 67, 70, 71, 70, 67, 67, 73, 72, 71, 69, 64, 61, 54, 50, 41, 36, 31, 21, 14, 18, 30, 38, 52, 60, 70, 78, 75, 77, 75, 80, 81, 83, 74, 70, 70, 71, 72, 74, 77, 78, 75, 76, 78, 92, 170, 211, 214, 212, 212, 213, 213, 213, 213, 213, 213, 213, 213, 213, 213, 213, 214, 215, 215, 216, 217, 218, 218, 219, 219, 220, 221, 219, 220, 219, 219, 219, 220, 219, 219, 218, 217, 218, 218, 218, 217, 218, 217, 217, 218, 218, 217, 215, 216, 216, 215, 216, 216, 216, 215, 215, 215, 215, 215, 215, 215, 213, 214, 214, 213, 214, 213, 213, 211, 212, 212, 212, 212, 212, 212, 213, 214, 214, 213, 84, 124, 180, 189, 190, 189, 90, 142, 204, 198, 209, 139, 58, 57, 139, 135, 17, 72, 88, 86, 142, 127, 133, 176, 128, 143, 180, 178, 203, 205, 202, 207, 210, 211, 199, 133, 68, 118, 92, 127, 159, 120, 92, 92, 91, 134, 122, 112, 30, 25, 123, 63, 51, 97, 106, 164, 127, 142, 170, 133, 170, 164, 158, 142, 122, 150, 211, 196, 190, 199, 181, 123, 199, 190, 199, 190, 172, 196, 184, 158, 185, 202, 204, 197, 208, 213, 211, 212, 212, 212, 212, 212, 212, 212, 212, 212, 212, 212, 212, 212, 210, 210, 211, 211, 212, 211, 211, 212, 212, 213, 212, 209, 204, 91, 69, 62, 43, 68, 56, 65, 63, 57, 63, 63, 65, 67, 64, 62, 58, 60, 67, 65, 65, 69, 73, 72, 72, 73, 73, 69, 60, 52, 30, 36, 36, 19, 15, 17, 11, 13, 28, 41, 31, 15, 11, 13, 21, 34, 45, 57, 65, 81, 70, 83, 89, 79, 77, 71, 70, 73, 74, 71, 72, 75, 78, 82, 86, 157, 212, 213, 214, 211, 213, 213, 214, 214, 214, 214, 214, 214, 214, 214, 214, 215, 216, 216, 217, 217, 219, 219, 219, 220, 221, 222, 220, 220, 219, 219, 219, 219, 219, 219, 219, 217, 217, 217, 218, 217, 219, 217, 217, 218, 217, 217, 216, 216, 217, 217, 217, 217, 217, 215, 216, 216, 215, 215, 215, 216, 214, 213, 215, 214, 214, 213, 212, 212, 212, 212, 212, 212, 212, 211, 212, 213, 212, 213, 142, 141, 136, 187, 183, 178, 181, 79, 168, 190, 177, 176, 100, 153, 214, 139, 42, 15, 7, 60, 106, 197, 175, 165, 137, 131, 158, 185, 194, 209, 215, 168, 151, 126, 129, 117, 151, 171, 120, 174, 108, 184, 159, 112, 75, 98, 81, 40, 127, 75, 34, 90, 123, 100, 126, 158, 172, 154, 154, 149, 183, 183, 170, 182, 153, 155, 144, 168, 212, 187, 194, 134, 192, 185, 167, 194, 161, 122, 154, 186, 179, 189, 197, 205, 211, 211, 212, 212, 212, 212, 212, 212, 212, 212, 212, 212, 212, 212, 212, 212, 210, 210, 211, 211, 211, 211, 211, 211, 211, 212, 209, 207, 201, 87, 66, 57, 56, 72, 58, 55, 56, 65, 58, 58, 60, 60, 63, 63, 58, 63, 67, 66, 67, 72, 69, 66, 58, 46, 42, 32, 29, 24, 12, 5, 11, 14, 29, 53, 37, 37, 65, 71, 61, 46, 35, 27, 14, 13, 13, 20, 29, 42, 54, 63, 76, 82, 76, 71, 73, 71, 74, 76, 72, 75, 77, 80, 85, 144, 213, 212, 214, 214, 214, 214, 213, 213, 213, 213, 213, 214, 214, 214, 215, 216, 217, 218, 217, 218, 220, 220, 220, 221, 222, 223, 221, 220, 219, 219, 219, 219, 218, 219, 219, 217, 218, 218, 219, 218, 219, 218, 218, 218, 217, 218, 217, 217, 218, 217, 216, 215, 217, 217, 216, 216, 216, 216, 216, 216, 214, 214, 213, 213, 213, 211, 211, 211, 212, 212, 212, 212, 212, 212, 212, 212, 211, 211, 183, 153, 189, 123, 161, 187, 199, 174, 75, 143, 148, 205, 82, 97, 91, 55, 44, 80, 54, 61, 20, 30, 45, 78, 78, 71, 129, 125, 141, 136, 100, 162, 162, 169, 159, 162, 169, 187, 118, 176, 158, 123, 183, 179, 66, 59, 105, 106, 121, 97, 21, 41, 89, 97, 96, 134, 161, 175, 189, 179, 163, 162, 168, 164, 201, 177, 164, 181, 164, 190, 175, 131, 173, 153, 196, 132, 120, 168, 175, 164, 192, 203, 210, 210, 212, 211, 211, 212, 212, 212, 212, 212, 212, 212, 212, 212, 212, 212, 213, 213, 212, 212, 212, 212, 211, 211, 211, 211, 211, 210, 211, 208, 203, 86, 69, 58, 58, 59, 46, 54, 60, 59, 61, 66, 65, 70, 64, 63, 63, 65, 71, 65, 54, 50, 35, 29, 17, 12, 7, 3, 9, 17, 39, 36, 55, 63, 52, 48, 36, 36, 55, 70, 68, 63, 47, 49, 61, 59, 42, 17, 7, 8, 17, 32, 42, 50, 63, 68, 78, 82, 77, 77, 75, 75, 77, 74, 84, 125, 210, 211, 212, 213, 214, 212, 213, 212, 212, 212, 214, 216, 218, 218, 218, 218, 219, 218, 219, 219, 219, 218, 219, 221, 222, 222, 221, 220, 219, 219, 219, 219, 219, 219, 219, 218, 219, 220, 220, 219, 220, 219, 218, 218, 218, 218, 217, 217, 218, 218, 216, 215, 216, 218, 218, 218, 217, 216, 216, 216, 214, 214, 215, 214, 213, 211, 212, 212, 211, 212, 211, 211, 215, 211, 211, 213, 210, 211, 133, 110, 60, 174, 146, 175, 200, 198, 145, 55, 128, 179, 119, 57, 141, 141, 123, 68, 29, 34, 45, 29, 14, 97, 141, 67, 89, 131, 157, 191, 167, 125, 194, 186, 144, 168, 191, 178, 112, 188, 167, 142, 94, 79, 137, 67, 95, 87, 46, 54, 64, 50, 29, 81, 79, 129, 84, 103, 148, 193, 193, 181, 164, 180, 204, 188, 207, 215, 195, 198, 139, 137, 126, 158, 156, 59, 97, 122, 139, 147, 169, 187, 203, 210, 211, 214, 210, 212, 212, 212, 212, 212, 212, 212, 212, 212, 212, 212, 213, 213, 213, 213, 213, 213, 211, 210, 210, 210, 210, 212, 212, 208, 203, 92, 64, 60, 56, 53, 53, 56, 60, 57, 65, 70, 68, 69, 62, 56, 47, 40, 41, 29, 16, 12, 15, 5, 8, 19, 13, 10, 47, 64, 52, 31, 70, 66, 51, 45, 41, 36, 55, 72, 74, 83, 74, 56, 56, 56, 48, 72, 80, 53, 33, 28, 7, 8, 8, 25, 30, 35, 54, 73, 77, 75, 77, 78, 81, 85, 115, 209, 212, 216, 214, 214, 214, 212, 212, 212, 212, 215, 217, 218, 222, 218, 218, 217, 216, 219, 219, 219, 218, 220, 221, 222, 222, 221, 220, 219, 219, 219, 220, 219, 219, 220, 218, 219, 220, 220, 220, 220, 219, 218, 219, 218, 219, 218, 218, 217, 216, 217, 219, 218, 215, 216, 216, 216, 215, 215, 216, 214, 213, 213, 214, 213, 212, 212, 213, 212, 212, 211, 211, 212, 212, 212, 212, 212, 211, 151, 130, 185, 174, 93, 86, 124, 154, 127, 70, 75, 169, 188, 112, 70, 59, 101, 83, 32, 37, 41, 50, 16, 31, 41, 43, 114, 156, 188, 185, 190, 208, 163, 138, 157, 187, 198, 193, 146, 146, 113, 142, 118, 136, 146, 125, 90, 42, 17, 45, 74, 78, 74, 108, 92, 64, 145, 167, 172, 183, 203, 186, 166, 169, 151, 134, 131, 137, 166, 171, 83, 61, 106, 102, 47, 75, 132, 155, 161, 156, 155, 172, 186, 203, 202, 212, 212, 212, 212, 212, 212, 212, 212, 212, 212, 212, 212, 213, 213, 213, 213, 213, 214, 214, 212, 212, 211, 211, 211, 213, 213, 208, 205, 96, 64, 66, 55, 52, 56, 53, 56, 53, 58, 53, 43, 38, 32, 21, 14, 11, 12, 22, 24, 31, 59, 76, 62, 44, 63, 61, 48, 22, 77, 9, 29, 44, 42, 38, 61, 77, 73, 72, 77, 82, 63, 50, 48, 53, 29, 31, 65, 57, 58, 58, 53, 22, 6, 8, 11, 14, 20, 36, 48, 61, 75, 81, 90, 102, 205, 215, 214, 212, 216, 216, 215, 214, 214, 214, 214, 215, 218, 218, 218, 216, 217, 218, 218, 220, 220, 221, 221, 222, 222, 222, 222, 222, 221, 219, 219, 220, 220, 220, 220, 218, 220, 220, 220, 220, 219, 218, 218, 219, 219, 220, 218, 217, 217, 218, 218, 218, 217, 216, 217, 216, 216, 216, 216, 215, 215, 215, 215, 214, 214, 214, 213, 213, 213, 213, 212, 211, 212, 214, 212, 210, 211, 210, 183, 184, 169, 163, 185, 128, 165, 113, 99, 78, 151, 65, 122, 93, 41, 68, 42, 21, 88, 129, 105, 74, 56, 134, 135, 134, 44, 53, 56, 149, 195, 168, 123, 93, 85, 81, 114, 115, 130, 165, 191, 182, 171, 131, 106, 91, 145, 117, 49, 53, 115, 135, 115, 103, 117, 108, 88, 139, 155, 119, 128, 150, 120, 133, 142, 153, 137, 94, 89, 71, 48, 47, 99, 91, 56, 40, 87, 119, 170, 190, 201, 202, 203, 191, 190, 209, 212, 212, 212, 212, 212, 212, 212, 212, 212, 212, 213, 213, 213, 213, 213, 213, 214, 214, 212, 212, 211, 210, 210, 214, 212, 208, 205, 90, 66, 64, 56, 52, 41, 38, 33, 30, 27, 18, 17, 8, 13, 9, 39, 40, 45, 50, 46, 67, 67, 61, 26, 67, 13, 10, 32, 42, 8, 75, 13, 36, 50, 41, 52, 64, 71, 68, 58, 67, 72, 74, 76, 61, 59, 44, 26, 65, 14, 56, 31, 64, 71, 44, 36, 32, 43, 26, 19, 20, 25, 30, 45, 65, 86, 190, 212, 212, 212, 216, 216, 216, 216, 215, 215, 215, 216, 217, 217, 215, 215, 217, 219, 219, 220, 221, 222, 223, 222, 222, 222, 222, 222, 222, 222, 222, 222, 221, 221, 220, 218, 220, 221, 220, 220, 219, 218, 218, 219, 219, 218, 218, 219, 218, 217, 218, 218, 218, 217, 217, 216, 215, 216, 217, 216, 215, 214, 214, 214, 214, 215, 215, 214, 213, 214, 212, 211, 214, 213, 211, 211, 212, 210, 178, 163, 197, 179, 176, 202, 199, 139, 103, 54, 139, 155, 71, 139, 106, 116, 95, 57, 72, 46, 93, 102, 77, 160, 177, 193, 179, 137, 197, 98, 38, 177, 166, 180, 171, 200, 173, 133, 144, 176, 160, 145, 154, 105, 91, 71, 78, 72, 64, 50, 59, 115, 113, 101, 121, 161, 78, 48, 34, 68, 78, 126, 141, 139, 145, 82, 63, 111, 114, 114, 77, 97, 81, 123, 199, 140, 85, 155, 91, 98, 159, 183, 191, 196, 199, 212, 209, 212, 212, 211, 213, 212, 212, 212, 212, 212, 213, 213, 214, 213, 213, 213, 213, 213, 212, 211, 212, 213, 212, 213, 206, 214, 201, 86, 64, 51, 41, 34, 20, 12, 9, 7, 9, 14, 30, 62, 61, 40, 64, 56, 51, 62, 55, 62, 24, 57, 4, 67, 23, 32, 57, 36, 48, 61, 42, 36, 36, 43, 56, 59, 61, 48, 51, 60, 70, 71, 73, 41, 49, 66, 73, 21, 58, 3, 58, 23, 38, 68, 61, 59, 51, 38, 35, 19, 8, 21, 19, 34, 55, 78, 157, 207, 215, 210, 214, 212, 219, 218, 216, 212, 216, 217, 217, 214, 216, 219, 220, 222, 222, 222, 220, 221, 221, 221, 221, 221, 222, 223, 222, 222, 223, 222, 221, 220, 222, 222, 221, 220, 219, 218, 218, 219, 219, 219, 219, 219, 219, 218, 218, 218, 218, 217, 217, 216, 216, 216, 216, 216, 214, 213, 213, 213, 214, 214, 214, 215, 215, 214, 214, 213, 213, 210, 210, 211, 211, 210, 184, 160, 167, 178, 194, 204, 195, 177, 147, 36, 24, 18, 29, 29, 32, 45, 27, 37, 29, 54, 53, 40, 56, 103, 132, 150, 162, 139, 135, 196, 182, 55, 113, 175, 199, 196, 197, 166, 98, 64, 94, 118, 94, 49, 123, 78, 50, 82, 73, 37, 33, 47, 49, 110, 153, 146, 83, 107, 59, 105, 60, 28, 48, 50, 55, 92, 117, 109, 131, 151, 121, 144, 156, 133, 158, 180, 143, 108, 166, 157, 128, 129, 164, 208, 210, 210, 212, 213, 211, 210, 210, 212, 212, 212, 213, 213, 214, 212, 213, 213, 214, 214, 213, 213, 210, 212, 209, 211, 212, 160, 123, 72, 35, 34, 22, 16, 11, 9, 13, 17, 22, 48, 47, 61, 73, 63, 50, 44, 63, 59, 54, 55, 53, 63, 42, 68, 49, 58, 76, 58, 40, 44, 61, 47, 53, 66, 78, 61, 58, 59, 61, 53, 56, 62, 62, 60, 75, 78, 61, 43, 62, 81, 60, 43, 53, 36, 30, 45, 58, 52, 48, 45, 48, 61, 60, 47, 16, 17, 22, 34, 40, 41, 65, 111, 166, 213, 217, 215, 216, 214, 214, 213, 214, 215, 217, 219, 221, 223, 222, 222, 220, 221, 223, 223, 223, 222, 222, 223, 224, 225, 224, 222, 221, 222, 223, 223, 222, 220, 219, 219, 218, 219, 219, 219, 218, 218, 218, 218, 218, 218, 218, 217, 217, 216, 216, 215, 215, 215, 214, 214, 214, 213, 214, 214, 214, 215, 214, 214, 213, 212, 210, 211, 212, 211, 210, 209, 154, 196, 174, 187, 196, 199, 170, 153, 115, 56, 111, 34, 41, 28, 14, 19, 78, 54, 72, 66, 89, 60, 90, 148, 136, 147, 164, 145, 178, 115, 184, 209, 89, 105, 200, 186, 193, 168, 136, 76, 89, 53, 25, 91, 141, 81, 102, 98, 94, 53, 96, 136, 128, 134, 155, 115, 60, 59, 51, 100, 81, 142, 99, 63, 102, 93, 93, 91, 170, 207, 165, 151, 202, 151, 162, 193, 210, 152, 92, 163, 201, 173, 151, 171, 206, 206, 214, 211, 211, 213, 213, 213, 213, 213, 212, 211, 213, 211, 213, 214, 212, 214, 214, 213, 211, 207, 212, 208, 81, 34, 31, 19, 16, 24, 15, 30, 43, 34, 51, 69, 51, 54, 39, 61, 25, 37, 58, 40, 65, 63, 65, 69, 65, 60, 64, 47, 59, 67, 67, 58, 72, 72, 76, 56, 30, 19, 11, 26, 29, 39, 47, 43, 55, 63, 49, 40, 44, 32, 55, 75, 78, 71, 76, 62, 56, 64, 61, 63, 63, 53, 48, 38, 43, 57, 72, 59, 84, 57, 44, 39, 21, 13, 24, 34, 39, 52, 78, 136, 207, 222, 217, 215, 214, 216, 218, 218, 221, 222, 222, 221, 222, 223, 224, 225, 225, 223, 222, 223, 223, 224, 224, 222, 221, 220, 220, 221, 221, 220, 220, 219, 219, 219, 219, 219, 219, 219, 220, 219, 218, 218, 218, 217, 217, 216, 215, 215, 215, 214, 214, 214, 214, 214, 215, 214, 214, 215, 213, 213, 212, 211, 208, 210, 210, 209, 210, 209, 160, 176, 159, 181, 179, 165, 161, 174, 82, 29, 81, 36, 74, 138, 50, 12, 21, 71, 118, 59, 50, 49, 131, 106, 123, 142, 148, 148, 190, 188, 184, 90, 160, 105, 96, 180, 163, 161, 139, 116, 187, 86, 69, 65, 36, 51, 35, 20, 53, 55, 104, 102, 52, 66, 69, 134, 155, 108, 63, 66, 122, 104, 186, 81, 76, 144, 145, 119, 128, 121, 153, 165, 188, 175, 186, 177, 206, 208, 180, 101, 105, 194, 202, 189, 209, 209, 212, 212, 212, 212, 212, 215, 215, 215, 213, 213, 213, 213, 212, 211, 209, 209, 210, 211, 211, 206, 213, 124, 27, 33, 40, 39, 42, 62, 55, 63, 38, 54, 64, 39, 25, 66, 6, 70, 34, 44, 53, 35, 59, 74, 73, 69, 66, 47, 68, 80, 71, 74, 55, 46, 28, 7, 8, 25, 32, 34, 35, 35, 25, 15, 9, 12, 8, 14, 28, 34, 35, 39, 34, 18, 26, 51, 73, 82, 77, 71, 49, 54, 80, 71, 70, 51, 49, 60, 56, 72, 12, 66, 71, 44, 67, 53, 37, 25, 20, 19, 29, 32, 35, 56, 126, 209, 213, 220, 224, 220, 223, 221, 221, 221, 222, 223, 223, 224, 225, 222, 223, 222, 221, 220, 221, 220, 221, 219, 221, 220, 219, 220, 220, 220, 220, 220, 220, 221, 219, 219, 219, 219, 219, 219, 218, 218, 217, 216, 216, 215, 214, 214, 212, 213, 215, 216, 214, 215, 215, 214, 213, 212, 212, 212, 211, 209, 209, 209, 208, 211, 156, 150, 173, 168, 126, 89, 69, 57, 29, 25, 58, 54, 81, 104, 72, 31, 17, 17, 56, 63, 33, 24, 53, 61, 80, 108, 108, 128, 124, 147, 193, 192, 151, 176, 133, 65, 135, 167, 176, 91, 139, 104, 46, 27, 24, 25, 34, 87, 73, 56, 48, 82, 74, 117, 149, 157, 183, 174, 131, 119, 128, 112, 111, 148, 87, 86, 152, 154, 163, 164, 157, 120, 152, 195, 174, 187, 187, 206, 196, 190, 158, 122, 162, 205, 209, 215, 211, 212, 212, 212, 212, 215, 215, 213, 213, 213, 213, 212, 211, 211, 211, 211, 210, 212, 211, 210, 161, 34, 29, 52, 62, 62, 69, 71, 49, 34, 64, 11, 39, 49, 26, 74, 34, 59, 70, 57, 58, 62, 56, 61, 50, 48, 41, 48, 57, 37, 17, 8, 16, 21, 38, 47, 50, 41, 20, 12, 9, 11, 9, 13, 10, 21, 22, 21, 21, 8, 9, 11, 15, 27, 33, 37, 30, 24, 28, 33, 53, 66, 79, 78, 71, 67, 56, 57, 61, 73, 76, 24, 58, 33, 57, 41, 50, 62, 68, 55, 41, 37, 29, 23, 30, 42, 82, 218, 220, 222, 223, 224, 224, 223, 222, 223, 223, 223, 224, 224, 223, 224, 223, 221, 221, 222, 221, 222, 221, 221, 220, 220, 220, 220, 220, 220, 220, 220, 221, 219, 219, 219, 218, 219, 218, 218, 218, 217, 216, 216, 215, 214, 214, 216, 216, 214, 216, 215, 215, 215, 214, 214, 212, 212, 211, 211, 210, 210, 210, 209, 212, 151, 96, 106, 108, 82, 91, 61, 33, 23, 91, 45, 69, 68, 107, 105, 104, 65, 24, 2, 26, 33, 27, 86, 86, 96, 88, 109, 145, 135, 144, 201, 133, 143, 131, 163, 163, 59, 52, 139, 109, 65, 73, 94, 60, 64, 43, 23, 54, 89, 74, 75, 70, 131, 123, 153, 158, 168, 160, 99, 92, 123, 120, 109, 141, 144, 116, 137, 195, 176, 173, 212, 170, 109, 136, 190, 169, 202, 192, 204, 190, 203, 168, 122, 157, 189, 215, 211, 212, 212, 212, 212, 213, 213, 213, 213, 213, 213, 211, 211, 212, 210, 210, 210, 210, 209, 210, 48, 24, 46, 42, 67, 72, 69, 74, 50, 41, 72, 41, 59, 66, 61, 38, 65, 62, 43, 59, 69, 56, 52, 59, 52, 50, 54, 28, 28, 37, 44, 44, 39, 22, 13, 10, 12, 6, 11, 13, 13, 11, 8, 7, 21, 49, 44, 29, 41, 2, 9, 13, 11, 13, 10, 11, 14, 19, 27, 38, 36, 28, 21, 28, 42, 57, 60, 60, 59, 66, 86, 41, 61, 77, 58, 46, 31, 38, 45, 21, 66, 66, 51, 53, 38, 42, 52, 33, 175, 219, 224, 226, 225, 224, 223, 222, 223, 223, 223, 224, 224, 222, 223, 223, 221, 221, 221, 220, 221, 221, 221, 221, 220, 219, 219, 220, 220, 220, 220, 220, 219, 219, 218, 218, 219, 218, 218, 217, 217, 216, 216, 215, 214, 214, 214, 214, 216, 216, 215, 215, 215, 213, 213, 212, 212, 212, 211, 210, 211, 211, 210, 213, 25, 32, 53, 82, 94, 74, 87, 45, 76, 130, 61, 47, 83, 95, 100, 127, 77, 24, 35, 18, 13, 10, 31, 61, 70, 114, 169, 165, 165, 172, 91, 83, 127, 159, 140, 146, 181, 151, 90, 89, 24, 42, 134, 80, 57, 43, 63, 37, 162, 67, 37, 62, 71, 100, 119, 145, 110, 84, 90, 126, 149, 156, 127, 129, 114, 145, 153, 131, 153, 183, 192, 200, 204, 147, 165, 156, 191, 183, 204, 192, 203, 211, 209, 189, 171, 205, 212, 212, 212, 212, 212, 212, 213, 213, 213, 213, 212, 210, 210, 211, 212, 210, 210, 210, 210, 209, 95, 20, 34, 64, 46, 65, 69, 64, 76, 56, 69, 49, 74, 66, 61, 44, 68, 64, 65, 58, 34, 23, 13, 38, 45, 40, 53, 49, 34, 23, 21, 14, 11, 11, 14, 14, 15, 12, 18, 16, 13, 8, 4, 8, 18, 35, 17, 16, 31, 3, 9, 9, 12, 13, 13, 10, 12, 15, 15, 11, 16, 23, 35, 40, 34, 33, 61, 57, 58, 59, 71, 72, 59, 59, 58, 63, 66, 50, 62, 17, 75, 53, 53, 74, 65, 62, 61, 31, 61, 218, 218, 224, 227, 224, 224, 223, 225, 225, 223, 222, 222, 221, 222, 222, 220, 220, 220, 218, 220, 221, 221, 221, 221, 220, 219, 220, 219, 219, 219, 219, 219, 219, 219, 217, 218, 218, 218, 217, 217, 216, 216, 215, 214, 215, 216, 216, 216, 216, 215, 215, 215, 213, 212, 212, 212, 212, 212, 211, 211, 212, 211, 209, 142, 75, 91, 93, 89, 95, 84, 32, 74, 84, 89, 103, 107, 85, 75, 67, 60, 51, 105, 58, 22, 25, 21, 48, 72, 136, 153, 131, 96, 97, 120, 120, 144, 179, 126, 164, 160, 105, 33, 51, 81, 52, 32, 18, 31, 59, 33, 36, 51, 49, 52, 123, 129, 95, 88, 102, 105, 121, 152, 146, 151, 143, 121, 97, 143, 186, 140, 180, 157, 202, 196, 201, 156, 176, 177, 193, 191, 190, 195, 194, 208, 211, 209, 207, 210, 212, 212, 212, 212, 213, 213, 214, 213, 212, 211, 211, 211, 210, 210, 211, 211, 212, 211, 211, 143, 26, 23, 48, 60, 52, 70, 74, 78, 68, 57, 68, 77, 72, 70, 75, 65, 54, 29, 18, 13, 21, 28, 31, 33, 25, 22, 17, 12, 8, 13, 9, 12, 14, 16, 9, 11, 17, 13, 15, 13, 14, 7, 6, 7, 11, 13, 10, 16, 13, 10, 19, 7, 8, 7, 6, 5, 4, 7, 9, 8, 13, 10, 13, 15, 16, 20, 33, 35, 49, 65, 54, 52, 33, 42, 59, 76, 70, 61, 73, 63, 54, 73, 75, 63, 67, 78, 77, 82, 75, 51, 32, 166, 221, 225, 226, 225, 225, 223, 224, 223, 221, 221, 221, 221, 222, 221, 220, 222, 220, 219, 220, 222, 221, 221, 221, 220, 219, 217, 216, 217, 217, 217, 218, 216, 219, 217, 218, 218, 218, 217, 217, 217, 215, 214, 215, 215, 216, 216, 216, 215, 215, 214, 213, 212, 212, 211, 211, 211, 211, 211, 210, 209, 208, 209, 91, 88, 110, 130, 115, 51, 32, 103, 106, 103, 70, 58, 76, 117, 102, 70, 35, 83, 106, 72, 68, 85, 117, 45, 20, 26, 32, 81, 159, 113, 67, 108, 104, 146, 149, 128, 88, 104, 174, 128, 95, 137, 133, 28, 38, 63, 40, 49, 17, 53, 51, 55, 84, 142, 110, 96, 120, 101, 116, 152, 129, 141, 136, 151, 106, 183, 184, 145, 153, 170, 159, 139, 175, 154, 174, 155, 156, 172, 182, 192, 207, 214, 210, 209, 208, 211, 213, 213, 212, 213, 213, 213, 211, 211, 211, 211, 211, 209, 210, 211, 213, 213, 206, 175, 36, 21, 34, 49, 58, 73, 76, 63, 52, 41, 78, 82, 66, 41, 19, 13, 10, 28, 32, 33, 36, 28, 23, 16, 9, 13, 10, 11, 14, 24, 29, 19, 7, 8, 8, 13, 10, 11, 9, 8, 13, 10, 11, 12, 13, 10, 11, 12, 13, 10, 6, 11, 15, 11, 17, 28, 8, 6, 7, 6, 8, 8, 8, 8, 6, 6, 13, 10, 14, 12, 8, 12, 14, 6, 16, 31, 48, 44, 40, 26, 20, 23, 35, 70, 65, 70, 58, 63, 77, 63, 76, 74, 78, 78, 80, 27, 75, 215, 221, 225, 225, 224, 221, 223, 222, 221, 221, 222, 221, 221, 221, 222, 222, 220, 220, 220, 222, 221, 221, 221, 218, 218, 218, 217, 219, 219, 219, 219, 219, 219, 218, 218, 217, 217, 217, 217, 216, 214, 214, 217, 216, 215, 214, 214, 214, 214, 214, 213, 212, 210, 210, 210, 210, 210, 210, 211, 212, 212, 211, 85, 119, 79, 165, 130, 110, 39, 62, 65, 99, 152, 110, 111, 150, 103, 59, 44, 73, 131, 83, 92, 52, 59, 58, 48, 45, 39, 36, 53, 69, 60, 103, 107, 59, 32, 93, 104, 107, 95, 103, 61, 94, 129, 67, 45, 95, 66, 106, 29, 71, 41, 43, 44, 76, 129, 84, 74, 100, 122, 141, 138, 162, 155, 142, 149, 186, 180, 171, 125, 106, 154, 162, 98, 99, 126, 134, 154, 164, 174, 196, 205, 210, 211, 210, 210, 213, 212, 213, 213, 213, 213, 211, 211, 211, 210, 210, 210, 210, 210, 211, 208, 209, 202, 69, 22, 35, 61, 49, 62, 53, 65, 52, 52, 49, 24, 20, 34, 55, 58, 47, 30, 20, 13, 10, 11, 12, 14, 15, 14, 8, 22, 59, 51, 45, 30, 7, 8, 8, 11, 13, 10, 8, 6, 6, 6, 7, 8, 7, 9, 9, 7, 12, 16, 14, 18, 32, 6, 5, 4, 5, 7, 7, 7, 7, 7, 7, 7, 8, 11, 7, 5, 27, 36, 23, 11, 9, 12, 19, 29, 41, 30, 23, 21, 11, 25, 48, 74, 65, 57, 66, 78, 80, 81, 88, 35, 33, 161, 227, 227, 226, 224, 222, 223, 223, 222, 222, 222, 220, 222, 222, 222, 222, 221, 221, 221, 221, 222, 221, 221, 219, 218, 218, 218, 219, 219, 219, 218, 219, 219, 219, 218, 217, 216, 217, 215, 216, 215, 215, 216, 216, 215, 214, 213, 213, 213, 213, 212, 211, 210, 210, 210, 211, 210, 210, 210, 209, 209, 210, 78, 107, 118, 100, 79, 77, 47, 143, 139, 100, 149, 162, 98, 94, 87, 90, 65, 89, 154, 100, 129, 74, 108, 107, 95, 132, 166, 140, 105, 113, 102, 83, 84, 35, 43, 28, 52, 86, 113, 99, 81, 64, 39, 52, 27, 76, 56, 81, 50, 34, 54, 67, 103, 95, 106, 128, 147, 155, 180, 152, 157, 173, 153, 140, 161, 183, 144, 164, 117, 107, 90, 129, 172, 178, 191, 208, 201, 206, 208, 209, 209, 209, 210, 210, 212, 213, 213, 213, 213, 211, 211, 210, 210, 211, 212, 213, 213, 211, 210, 210, 211, 213, 98, 23, 26, 62, 42, 55, 53, 46, 39, 38, 44, 47, 47, 40, 25, 17, 14, 17, 16, 15, 17, 15, 16, 20, 17, 13, 10, 7, 15, 36, 23, 20, 18, 14, 13, 10, 15, 14, 13, 10, 6, 5, 8, 8, 13, 15, 14, 11, 12, 14, 14, 13, 12, 16, 31, 7, 4, 3, 4, 3, 6, 7, 7, 7, 7, 13, 10, 11, 9, 6, 7, 16, 23, 32, 47, 13, 10, 9, 9, 9, 9, 9, 18, 31, 33, 35, 24, 24, 31, 52, 69, 73, 68, 66, 81, 49, 22, 80, 233, 230, 223, 224, 220, 224, 225, 224, 223, 222, 222, 222, 222, 222, 222, 221, 221, 220, 220, 220, 220, 220, 220, 219, 219, 219, 219, 219, 219, 218, 217, 218, 218, 217, 218, 218, 215, 216, 215, 215, 216, 216, 215, 215, 214, 213, 211, 212, 212, 211, 210, 212, 212, 212, 213, 210, 210, 210, 210, 210, 210, 32, 80, 94, 18, 46, 113, 54, 136, 162, 134, 170, 165, 147, 73, 100, 140, 103, 118, 159, 93, 147, 113, 162, 155, 158, 150, 92, 149, 70, 72, 93, 105, 85, 53, 40, 59, 67, 80, 98, 90, 112, 145, 128, 39, 29, 22, 25, 19, 72, 32, 31, 33, 43, 95, 91, 113, 187, 173, 184, 167, 171, 187, 169, 152, 163, 88, 118, 99, 41, 103, 130, 123, 150, 133, 130, 141, 181, 207, 212, 210, 210, 209, 210, 210, 213, 213, 213, 213, 213, 211, 211, 211, 211, 212, 213, 213, 213, 213, 210, 210, 211, 140, 27, 21, 43, 37, 49, 47, 51, 51, 44, 40, 25, 16, 13, 12, 15, 13, 16, 16, 12, 9, 13, 10, 12, 11, 9, 6, 6, 5, 5, 16, 16, 14, 18, 16, 13, 12, 11, 13, 10, 9, 9, 8, 9, 9, 11, 13, 11, 13, 18, 14, 7, 6, 4, 13, 10, 17, 13, 10, 7, 13, 10, 8, 8, 8, 9, 13, 10, 13, 10, 9, 9, 6, 9, 13, 14, 13, 17, 18, 8, 6, 9, 12, 13, 12, 8, 7, 12, 13, 19, 30, 33, 36, 45, 63, 66, 68, 73, 83, 29, 31, 178, 223, 225, 222, 220, 225, 225, 224, 223, 222, 220, 221, 222, 222, 223, 222, 221, 221, 220, 220, 221, 220, 219, 219, 219, 219, 219, 219, 219, 219, 218, 218, 218, 218, 218, 218, 216, 216, 216, 216, 216, 216, 215, 214, 213, 213, 212, 212, 211, 210, 212, 212, 212, 212, 212, 210, 210, 210, 210, 210, 209, 115, 69, 26, 34, 42, 32, 50, 73, 80, 79, 62, 61, 77, 66, 42, 59, 84, 95, 99, 66, 96, 101, 108, 119, 107, 106, 106, 29, 55, 80, 122, 102, 115, 83, 73, 131, 94, 108, 90, 103, 110, 130, 111, 85, 86, 45, 26, 24, 53, 47, 40, 30, 27, 72, 140, 193, 119, 140, 156, 177, 192, 195, 152, 97, 65, 50, 106, 71, 71, 98, 113, 147, 210, 197, 179, 180, 196, 205, 211, 211, 210, 208, 211, 211, 213, 213, 213, 213, 213, 211, 211, 211, 211, 213, 214, 215, 215, 215, 211, 212, 191, 31, 23, 35, 44, 46, 63, 62, 55, 19, 9, 12, 18, 11, 12, 14, 14, 16, 13, 11, 8, 7, 8, 8, 8, 7, 7, 8, 6, 5, 12, 22, 27, 33, 20, 12, 11, 12, 13, 10, 9, 13, 10, 7, 12, 14, 21, 18, 8, 7, 16, 14, 5, 8, 7, 13, 10, 17, 17, 19, 19, 13, 13, 10, 11, 13, 10, 13, 10, 8, 6, 7, 6, 12, 16, 13, 10, 12, 15, 11, 9, 11, 8, 11, 14, 13, 14, 16, 19, 18, 15, 13, 10, 12, 25, 39, 55, 69, 63, 61, 76, 48, 23, 73, 221, 225, 224, 224, 225, 225, 224, 223, 222, 221, 222, 222, 222, 222, 222, 220, 220, 219, 220, 220, 219, 219, 219, 219, 219, 219, 219, 219, 220, 219, 218, 218, 218, 218, 218, 217, 216, 216, 216, 215, 214, 214, 213, 213, 213, 213, 213, 212, 211, 212, 213, 212, 212, 212, 210, 210, 210, 210, 210, 210, 74, 52, 42, 54, 31, 12, 21, 57, 87, 81, 96, 98, 74, 52, 65, 78, 68, 94, 68, 115, 138, 130, 86, 106, 109, 125, 148, 74, 65, 86, 78, 96, 140, 80, 118, 147, 102, 104, 152, 121, 103, 115, 110, 78, 139, 86, 95, 39, 68, 105, 73, 38, 41, 64, 100, 126, 153, 131, 94, 113, 135, 169, 167, 183, 130, 47, 33, 70, 66, 67, 65, 112, 110, 134, 184, 203, 200, 205, 211, 210, 210, 209, 210, 211, 213, 213, 213, 213, 213, 211, 211, 212, 211, 213, 214, 214, 216, 211, 211, 195, 60, 22, 22, 47, 42, 62, 62, 41, 25, 12, 16, 34, 47, 40, 13, 10, 6, 9, 8, 13, 10, 13, 10, 8, 8, 7, 8, 8, 6, 6, 5, 8, 3, 9, 35, 50, 51, 23, 12, 13, 14, 15, 18, 24, 18, 7, 22, 24, 31, 31, 34, 35, 32, 21, 13, 10, 26, 36, 40, 37, 32, 33, 27, 12, 14, 14, 13, 10, 8, 7, 6, 8, 13, 10, 18, 14, 14, 13, 7, 13, 10, 11, 13, 10, 13, 10, 9, 13, 10, 13, 10, 13, 10, 12, 13, 14, 14, 12, 12, 13, 10, 11, 15, 35, 50, 74, 55, 31, 33, 178, 223, 225, 226, 225, 225, 224, 223, 222, 222, 222, 222, 221, 221, 220, 220, 219, 219, 220, 220, 219, 219, 219, 219, 218, 218, 219, 219, 219, 219, 217, 217, 217, 218, 217, 216, 216, 216, 215, 214, 213, 213, 213, 213, 213, 213, 213, 213, 212, 212, 212, 212, 212, 212, 210, 210, 210, 210, 210, 210, 93, 89, 84, 74, 83, 140, 124, 62, 43, 79, 81, 68, 66, 60, 51, 45, 64, 97, 37, 134, 136, 124, 119, 114, 155, 135, 67, 69, 52, 42, 83, 78, 103, 102, 123, 146, 131, 112, 95, 143, 123, 106, 146, 156, 108, 124, 131, 65, 102, 31, 53, 75, 32, 53, 90, 104, 110, 177, 205, 166, 200, 197, 183, 196, 125, 53, 58, 86, 40, 63, 109, 94, 122, 126, 118, 141, 204, 199, 209, 211, 211, 210, 210, 210, 212, 212, 212, 213, 213, 211, 211, 210, 211, 211, 213, 213, 213, 217, 211, 104, 20, 25, 43, 33, 44, 70, 35, 27, 13, 20, 42, 44, 38, 34, 22, 9, 9, 8, 9, 8, 6, 7, 6, 7, 8, 8, 9, 7, 7, 11, 6, 33, 34, 20, 13, 10, 12, 22, 19, 5, 23, 26, 40, 41, 42, 50, 41, 24, 22, 34, 46, 43, 19, 40, 42, 29, 24, 37, 41, 48, 47, 31, 37, 25, 11, 16, 14, 13, 10, 15, 24, 16, 18, 11, 8, 8, 6, 4, 8, 9, 9, 8, 9, 13, 10, 12, 11, 9, 13, 10, 13, 10, 7, 14, 15, 13, 13, 10, 55, 75, 45, 17, 68, 222, 225, 230, 225, 225, 224, 224, 223, 222, 222, 222, 221, 221, 220, 220, 219, 220, 220, 220, 220, 219, 220, 220, 219, 218, 218, 219, 219, 217, 218, 218, 217, 217, 216, 216, 216, 216, 215, 214, 213, 213, 212, 212, 213, 214, 213, 213, 213, 212, 212, 212, 212, 212, 210, 210, 210, 210, 210, 210, 54, 28, 30, 21, 31, 55, 35, 42, 41, 30, 49, 48, 55, 59, 82, 42, 121, 105, 155, 115, 80, 112, 130, 145, 128, 62, 75, 108, 98, 41, 62, 71, 30, 31, 95, 160, 128, 133, 129, 117, 139, 146, 126, 104, 133, 146, 132, 61, 166, 92, 69, 61, 53, 84, 109, 146, 135, 144, 169, 203, 216, 209, 180, 189, 71, 46, 64, 101, 102, 74, 109, 70, 66, 90, 150, 162, 170, 195, 206, 214, 207, 212, 212, 212, 213, 212, 212, 213, 213, 212, 212, 209, 210, 210, 211, 211, 211, 209, 138, 29, 28, 41, 38, 38, 62, 46, 34, 13, 17, 13, 19, 28, 20, 14, 21, 19, 13, 10, 12, 8, 8, 8, 8, 9, 9, 9, 13, 10, 11, 14, 14, 14, 13, 14, 9, 8, 7, 7, 17, 34, 31, 34, 30, 29, 13, 10, 15, 56, 60, 36, 32, 53, 54, 51, 57, 55, 48, 49, 40, 34, 31, 39, 21, 24, 41, 43, 28, 19, 18, 12, 8, 9, 11, 13, 15, 7, 7, 9, 8, 9, 9, 9, 8, 9, 9, 9, 13, 10, 11, 11, 13, 10, 15, 23, 18, 18, 11, 25, 59, 74, 36, 26, 183, 226, 230, 224, 225, 224, 224, 223, 222, 222, 222, 221, 221, 220, 220, 219, 220, 220, 221, 221, 220, 220, 219, 219, 219, 220, 219, 219, 217, 218, 218, 217, 216, 216, 217, 216, 216, 215, 214, 213, 213, 212, 212, 213, 214, 213, 213, 213, 212, 212, 212, 212, 212, 210, 210, 210, 210, 210, 210, 32, 34, 41, 35, 102, 65, 73, 62, 100, 88, 55, 33, 29, 18, 97, 98, 113, 89, 161, 139, 151, 111, 118, 123, 83, 104, 115, 86, 91, 70, 71, 47, 46, 65, 105, 92, 83, 110, 104, 79, 172, 174, 111, 118, 142, 174, 169, 104, 164, 148, 92, 109, 82, 76, 100, 128, 150, 173, 165, 176, 209, 205, 179, 107, 54, 33, 43, 122, 134, 98, 82, 117, 108, 98, 73, 105, 140, 157, 181, 210, 209, 211, 211, 211, 213, 213, 213, 213, 214, 212, 212, 208, 208, 210, 211, 211, 212, 180, 46, 32, 47, 51, 39, 57, 65, 43, 17, 13, 10, 16, 8, 8, 12, 18, 15, 9, 11, 14, 12, 13, 13, 10, 12, 12, 15, 14, 13, 16, 17, 21, 12, 18, 18, 20, 15, 9, 17, 31, 23, 16, 21, 28, 41, 44, 25, 42, 64, 70, 57, 51, 55, 55, 54, 59, 60, 53, 48, 63, 68, 61, 60, 45, 27, 31, 31, 29, 45, 33, 18, 6, 9, 8, 15, 16, 13, 13, 10, 12, 9, 9, 8, 8, 7, 7, 8, 13, 10, 13, 10, 11, 13, 13, 16, 15, 15, 33, 26, 17, 33, 62, 62, 29, 93, 227, 228, 223, 223, 223, 223, 223, 222, 222, 222, 221, 221, 220, 220, 219, 220, 220, 221, 221, 221, 220, 219, 218, 218, 218, 219, 219, 218, 217, 217, 217, 218, 216, 216, 216, 216, 215, 214, 213, 213, 213, 213, 213, 214, 213, 213, 213, 212, 212, 212, 212, 212, 210, 210, 210, 210, 210, 211, 117, 102, 140, 87, 47, 64, 125, 47, 46, 54, 30, 54, 65, 53, 46, 93, 86, 131, 191, 208, 183, 186, 138, 106, 122, 122, 131, 167, 113, 55, 96, 86, 86, 86, 141, 170, 123, 122, 135, 125, 86, 143, 120, 147, 144, 170, 161, 102, 158, 168, 85, 106, 131, 116, 118, 56, 103, 159, 191, 173, 182, 201, 155, 23, 41, 92, 58, 55, 62, 107, 92, 30, 52, 127, 107, 103, 171, 206, 195, 213, 213, 214, 211, 211, 211, 212, 211, 214, 214, 212, 214, 211, 213, 211, 212, 210, 199, 51, 19, 28, 53, 48, 40, 68, 31, 22, 13, 17, 16, 8, 5, 7, 21, 32, 12, 21, 16, 16, 18, 15, 13, 12, 18, 18, 6, 9, 35, 38, 33, 26, 37, 36, 26, 12, 12, 50, 56, 37, 19, 42, 49, 48, 55, 58, 68, 70, 60, 57, 58, 61, 71, 65, 71, 69, 57, 61, 61, 62, 60, 57, 44, 52, 47, 40, 28, 19, 31, 23, 11, 15, 14, 17, 13, 8, 15, 14, 13, 11, 12, 5, 13, 10, 8, 9, 13, 11, 13, 13, 10, 13, 10, 9, 11, 14, 14, 12, 23, 53, 64, 37, 28, 170, 226, 222, 219, 220, 220, 220, 220, 219, 218, 218, 222, 221, 221, 220, 221, 219, 218, 218, 218, 217, 217, 217, 217, 219, 219, 218, 219, 218, 217, 218, 217, 216, 216, 216, 214, 213, 213, 214, 214, 213, 213, 213, 213, 213, 212, 212, 212, 212, 212, 212, 212, 210, 210, 210, 211, 211, 210, 134, 114, 157, 97, 77, 134, 84, 137, 108, 82, 81, 48, 74, 110, 108, 61, 82, 149, 169, 191, 186, 172, 164, 128, 181, 162, 201, 134, 99, 108, 82, 103, 97, 131, 131, 168, 170, 113, 93, 149, 86, 100, 149, 166, 162, 175, 159, 116, 179, 194, 149, 110, 131, 170, 154, 163, 158, 177, 129, 128, 130, 188, 206, 98, 30, 61, 102, 72, 59, 69, 102, 109, 96, 134, 124, 150, 143, 184, 206, 213, 210, 212, 211, 211, 212, 212, 212, 214, 213, 213, 212, 214, 214, 214, 211, 208, 87, 21, 27, 56, 47, 52, 64, 43, 32, 13, 10, 15, 16, 15, 15, 11, 6, 17, 56, 34, 11, 8, 14, 22, 18, 13, 19, 26, 38, 45, 36, 52, 38, 23, 26, 37, 52, 58, 39, 63, 76, 74, 71, 61, 58, 54, 56, 58, 66, 76, 77, 74, 74, 72, 73, 65, 71, 74, 74, 79, 75, 74, 68, 59, 64, 59, 57, 59, 53, 39, 46, 52, 33, 26, 28, 35, 37, 32, 32, 30, 23, 13, 10, 14, 15, 12, 8, 7, 11, 16, 17, 19, 15, 11, 9, 11, 9, 12, 19, 15, 30, 69, 46, 28, 81, 227, 222, 221, 222, 222, 223, 222, 221, 221, 221, 222, 220, 221, 219, 221, 219, 218, 219, 219, 219, 218, 218, 217, 219, 219, 218, 218, 218, 218, 218, 218, 216, 216, 215, 215, 213, 213, 213, 213, 213, 213, 213, 212, 212, 212, 212, 212, 212, 212, 212, 212, 209, 209, 209, 210, 210, 210, 103, 87, 147, 126, 125, 151, 87, 140, 163, 75, 50, 55, 110, 131, 151, 80, 71, 98, 159, 165, 166, 172, 130, 178, 183, 183, 142, 103, 148, 135, 97, 126, 113, 135, 118, 164, 175, 156, 174, 107, 122, 123, 165, 174, 168, 205, 159, 139, 188, 210, 188, 113, 147, 190, 177, 172, 183, 194, 207, 214, 167, 154, 188, 125, 59, 55, 42, 20, 46, 65, 128, 133, 109, 125, 141, 161, 174, 192, 207, 210, 211, 211, 211, 211, 211, 210, 211, 213, 213, 214, 213, 212, 213, 213, 212, 127, 22, 21, 53, 58, 51, 58, 48, 31, 9, 13, 10, 14, 11, 11, 12, 9, 6, 9, 24, 9, 8, 13, 10, 12, 29, 29, 35, 38, 31, 33, 18, 17, 56, 65, 48, 36, 67, 71, 70, 68, 68, 71, 70, 72, 72, 73, 65, 68, 73, 69, 67, 71, 75, 76, 70, 65, 72, 73, 78, 75, 75, 75, 76, 83, 77, 77, 71, 64, 60, 57, 55, 58, 66, 52, 36, 38, 50, 47, 26, 27, 34, 55, 37, 42, 28, 18, 6, 16, 24, 22, 22, 25, 23, 15, 13, 7, 7, 9, 12, 13, 17, 48, 56, 45, 28, 167, 223, 220, 220, 220, 222, 223, 222, 222, 223, 223, 221, 222, 220, 221, 220, 219, 219, 219, 219, 219, 218, 218, 219, 218, 219, 217, 217, 218, 217, 217, 215, 216, 215, 215, 214, 213, 213, 212, 212, 212, 212, 212, 211, 211, 211, 211, 212, 211, 210, 212, 210, 210, 210, 209, 209, 209, 101, 75, 116, 99, 112, 87, 46, 95, 50, 47, 49, 91, 88, 119, 82, 143, 97, 87, 124, 164, 195, 198, 170, 207, 183, 121, 127, 137, 158, 154, 119, 120, 157, 176, 167, 141, 198, 178, 197, 193, 166, 170, 191, 191, 181, 203, 165, 176, 193, 208, 203, 160, 149, 187, 204, 209, 203, 211, 211, 209, 203, 209, 192, 89, 38, 16, 19, 45, 66, 38, 36, 48, 51, 94, 98, 147, 169, 194, 207, 215, 212, 208, 211, 211, 211, 210, 212, 213, 213, 215, 213, 210, 214, 206, 160, 35, 23, 32, 40, 53, 51, 44, 31, 17, 13, 12, 13, 10, 9, 8, 13, 10, 9, 13, 10, 11, 9, 11, 6, 11, 28, 25, 15, 23, 37, 52, 44, 30, 28, 61, 66, 65, 68, 70, 62, 65, 67, 68, 68, 69, 72, 71, 70, 69, 71, 76, 74, 71, 72, 82, 83, 77, 73, 72, 71, 73, 73, 71, 78, 81, 80, 68, 66, 61, 72, 79, 74, 65, 68, 77, 64, 60, 59, 55, 48, 20, 39, 47, 35, 9, 27, 51, 45, 42, 43, 29, 19, 6, 4, 5, 27, 26, 9, 12, 8, 13, 10, 14, 14, 28, 59, 59, 26, 69, 220, 221, 223, 223, 224, 224, 223, 223, 224, 222, 222, 222, 222, 222, 221, 220, 220, 219, 219, 220, 220, 217, 219, 218, 218, 219, 218, 216, 216, 215, 215, 215, 215, 214, 215, 214, 214, 213, 212, 212, 212, 212, 212, 211, 211, 211, 212, 210, 210, 211, 209, 209, 209, 210, 210, 210, 96, 88, 77, 99, 46, 23, 32, 47, 81, 94, 96, 87, 67, 75, 165, 180, 126, 96, 135, 158, 190, 191, 196, 205, 146, 140, 211, 171, 163, 168, 176, 165, 169, 186, 189, 169, 187, 206, 204, 209, 202, 188, 175, 204, 207, 211, 183, 191, 210, 209, 210, 197, 206, 205, 212, 214, 210, 210, 213, 208, 188, 181, 165, 128, 114, 54, 40, 97, 102, 86, 100, 90, 108, 134, 167, 179, 163, 161, 169, 204, 213, 209, 211, 211, 211, 210, 211, 214, 214, 216, 213, 211, 207, 199, 60, 19, 29, 54, 49, 57, 50, 43, 23, 16, 14, 13, 10, 9, 7, 6, 8, 8, 9, 11, 14, 14, 23, 19, 28, 49, 48, 33, 31, 45, 42, 48, 51, 65, 63, 68, 65, 63, 67, 68, 70, 72, 72, 72, 72, 74, 73, 71, 73, 75, 72, 72, 78, 84, 84, 77, 71, 71, 71, 71, 75, 80, 79, 81, 79, 70, 64, 61, 71, 80, 75, 78, 80, 81, 75, 71, 68, 66, 63, 57, 55, 53, 66, 39, 30, 43, 27, 26, 34, 44, 29, 11, 2, 5, 7, 9, 13, 10, 8, 13, 10, 15, 14, 16, 47, 72, 41, 24, 166, 222, 221, 221, 222, 221, 221, 222, 222, 222, 222, 221, 221, 220, 220, 220, 219, 219, 218, 219, 219, 218, 219, 218, 219, 219, 218, 216, 215, 214, 214, 214, 214, 213, 213, 213, 212, 212, 212, 212, 212, 212, 212, 212, 211, 211, 212, 211, 211, 211, 209, 209, 210, 210, 210, 210, 65, 45, 62, 50, 45, 28, 39, 46, 73, 74, 41, 57, 93, 106, 132, 152, 175, 122, 138, 161, 177, 202, 213, 163, 161, 204, 173, 180, 166, 180, 190, 139, 188, 189, 199, 202, 184, 202, 210, 208, 211, 210, 208, 208, 210, 213, 211, 214, 212, 211, 212, 213, 211, 210, 213, 214, 212, 205, 191, 186, 191, 159, 162, 159, 168, 70, 74, 72, 104, 145, 119, 110, 88, 153, 183, 191, 199, 207, 212, 213, 212, 211, 211, 211, 211, 211, 210, 212, 213, 213, 212, 212, 214, 77, 22, 29, 60, 52, 43, 36, 41, 33, 13, 13, 11, 12, 13, 10, 8, 7, 13, 10, 8, 9, 13, 23, 29, 39, 33, 40, 50, 53, 50, 47, 48, 52, 55, 61, 68, 69, 71, 69, 69, 68, 62, 64, 71, 73, 71, 72, 73, 67, 69, 75, 77, 75, 77, 83, 85, 82, 75, 75, 75, 74, 73, 76, 80, 72, 76, 83, 84, 79, 75, 76, 80, 72, 77, 81, 81, 76, 72, 70, 68, 68, 68, 70, 70, 78, 71, 59, 52, 56, 49, 39, 44, 28, 14, 8, 6, 6, 9, 13, 10, 12, 9, 12, 17, 17, 14, 21, 75, 60, 21, 59, 217, 219, 222, 221, 220, 221, 222, 221, 221, 221, 220, 220, 219, 220, 220, 220, 219, 219, 217, 215, 216, 220, 218, 218, 217, 216, 217, 216, 213, 213, 213, 214, 213, 214, 213, 213, 211, 212, 212, 212, 212, 212, 212, 212, 212, 212, 212, 211, 211, 210, 210, 210, 210, 210, 210, 60, 21, 49, 100, 72, 85, 104, 115, 131, 97, 77, 54, 94, 94, 129, 156, 167, 138, 105, 186, 182, 203, 206, 207, 203, 206, 194, 168, 174, 193, 203, 156, 191, 192, 197, 206, 197, 200, 204, 209, 206, 209, 209, 211, 214, 212, 211, 215, 214, 211, 213, 214, 215, 211, 210, 215, 206, 201, 206, 192, 145, 193, 165, 181, 166, 77, 96, 90, 125, 127, 161, 140, 124, 140, 179, 192, 204, 206, 212, 213, 210, 210, 211, 211, 212, 211, 210, 213, 214, 213, 213, 211, 136, 32, 26, 56, 45, 48, 52, 43, 32, 13, 10, 14, 14, 13, 10, 13, 8, 8, 6, 6, 7, 9, 15, 32, 42, 47, 55, 53, 57, 52, 54, 51, 52, 58, 70, 67, 62, 66, 69, 65, 65, 64, 64, 67, 75, 79, 78, 71, 72, 69, 73, 78, 74, 73, 75, 77, 77, 71, 65, 69, 76, 68, 67, 72, 74, 75, 80, 86, 84, 79, 81, 83, 84, 74, 75, 76, 83, 75, 62, 70, 77, 83, 75, 76, 78, 83, 76, 54, 55, 53, 64, 64, 59, 57, 38, 30, 16, 7, 7, 13, 10, 12, 8, 13, 10, 11, 15, 16, 17, 65, 74, 47, 34, 159, 219, 221, 218, 218, 219, 221, 220, 221, 220, 220, 219, 219, 218, 218, 218, 217, 218, 218, 218, 219, 219, 217, 216, 215, 215, 214, 213, 215, 215, 213, 213, 212, 212, 212, 211, 211, 211, 212, 212, 212, 212, 212, 212, 212, 212, 212, 212, 211, 210, 210, 210, 210, 210, 210, 70, 47, 82, 76, 83, 86, 140, 92, 127, 120, 43, 48, 111, 127, 127, 164, 170, 167, 166, 207, 202, 208, 208, 203, 207, 202, 190, 180, 182, 200, 202, 175, 185, 196, 203, 210, 211, 211, 210, 211, 211, 211, 211, 211, 211, 211, 211, 211, 211, 211, 212, 211, 211, 210, 208, 208, 196, 211, 209, 196, 201, 172, 186, 180, 169, 97, 114, 125, 142, 183, 134, 189, 149, 161, 164, 185, 187, 193, 207, 211, 210, 209, 210, 210, 211, 211, 210, 212, 210, 208, 207, 168, 37, 23, 43, 41, 51, 53, 46, 40, 23, 15, 43, 24, 7, 11, 8, 13, 10, 13, 10, 5, 13, 10, 14, 26, 46, 51, 63, 67, 65, 64, 65, 72, 73, 75, 73, 69, 64, 63, 63, 63, 66, 67, 69, 66, 65, 68, 73, 73, 69, 69, 72, 76, 77, 78, 74, 74, 72, 71, 73, 69, 69, 74, 70, 72, 75, 79, 76, 71, 74, 79, 82, 85, 84, 82, 76, 74, 76, 76, 72, 66, 78, 85, 85, 79, 70, 69, 69, 66, 61, 62, 60, 56, 54, 61, 60, 60, 54, 35, 6, 7, 11, 12, 9, 13, 10, 9, 12, 11, 15, 44, 73, 57, 23, 67, 205, 227, 218, 220, 218, 219, 222, 220, 219, 219, 219, 217, 218, 219, 219, 219, 219, 218, 217, 217, 216, 215, 214, 214, 214, 214, 214, 214, 214, 213, 213, 212, 212, 212, 212, 211, 211, 212, 212, 212, 212, 212, 212, 212, 212, 212, 212, 211, 210, 210, 210, 210, 210, 210, 68, 48, 51, 74, 113, 144, 97, 82, 91, 97, 43, 64, 133, 93, 87, 136, 120, 123, 71, 140, 174, 201, 207, 211, 208, 208, 213, 208, 205, 207, 204, 195, 204, 210, 211, 211, 211, 211, 211, 211, 211, 211, 211, 211, 211, 211, 211, 211, 211, 211, 211, 211, 211, 211, 211, 208, 211, 212, 200, 204, 182, 199, 189, 191, 186, 116, 115, 154, 141, 193, 187, 157, 209, 181, 195, 190, 208, 208, 211, 210, 211, 211, 210, 211, 211, 212, 211, 210, 209, 208, 200, 62, 29, 39, 44, 53, 54, 67, 48, 31, 16, 43, 49, 28, 13, 10, 12, 15, 15, 12, 11, 13, 10, 23, 33, 56, 69, 70, 70, 68, 71, 73, 78, 79, 74, 69, 68, 66, 68, 70, 70, 70, 69, 70, 69, 69, 75, 71, 75, 74, 74, 76, 80, 78, 78, 72, 71, 70, 70, 74, 75, 73, 77, 69, 69, 75, 82, 78, 80, 75, 73, 75, 75, 76, 77, 79, 78, 74, 70, 70, 73, 83, 79, 71, 70, 71, 67, 67, 64, 61, 66, 68, 69, 66, 68, 66, 68, 64, 49, 15, 5, 8, 13, 10, 7, 9, 13, 10, 9, 12, 14, 27, 68, 63, 30, 29, 147, 227, 226, 220, 219, 221, 223, 221, 219, 218, 216, 215, 218, 219, 218, 218, 218, 217, 216, 215, 213, 214, 214, 214, 214, 214, 214, 214, 214, 213, 214, 212, 210, 211, 212, 212, 212, 212, 212, 212, 212, 212, 212, 212, 212, 212, 212, 211, 209, 209, 209, 209, 209, 209, 73, 63, 36, 94, 103, 139, 124, 54, 60, 75, 41, 88, 78, 63, 58, 80, 83, 76, 52, 105, 106, 139, 196, 199, 211, 210, 205, 212, 209, 207, 210, 213, 211, 210, 214, 211, 211, 211, 211, 211, 211, 211, 211, 211, 211, 211, 211, 211, 211, 211, 211, 211, 211, 211, 212, 204, 214, 197, 206, 186, 198, 206, 186, 181, 187, 126, 131, 203, 171, 159, 211, 167, 173, 207, 202, 212, 210, 209, 210, 212, 212, 210, 211, 211, 211, 213, 212, 211, 213, 206, 196, 48, 55, 49, 40, 61, 58, 31, 33, 16, 12, 30, 23, 15, 12, 13, 15, 15, 16, 13, 15, 34, 40, 68, 71, 74, 70, 63, 65, 71, 78, 81, 70, 69, 68, 68, 73, 71, 70, 74, 74, 75, 75, 74, 76, 74, 73, 71, 71, 70, 74, 76, 78, 75, 74, 72, 66, 72, 77, 69, 76, 68, 70, 77, 84, 78, 79, 75, 75, 80, 77, 82, 82, 78, 75, 73, 72, 77, 77, 80, 78, 69, 65, 69, 71, 72, 68, 66, 70, 71, 77, 75, 65, 65, 69, 67, 59, 30, 13, 10, 9, 13, 10, 9, 13, 10, 13, 10, 12, 18, 17, 20, 44, 72, 59, 26, 67, 222, 227, 222, 222, 222, 222, 219, 219, 218, 217, 216, 217, 218, 218, 218, 217, 216, 216, 215, 213, 213, 214, 214, 214, 214, 214, 214, 214, 213, 214, 213, 212, 212, 212, 212, 212, 212, 212, 212, 212, 212, 212, 212, 212, 212, 212, 211, 209, 209, 209, 209, 209, 210, 92, 52, 53, 93, 124, 144, 120, 61, 102, 70, 71, 75, 80, 55, 117, 119, 95, 83, 63, 127, 148, 125, 132, 178, 198, 204, 210, 209, 211, 208, 210, 210, 211, 211, 211, 211, 211, 211, 211, 211, 211, 211, 211, 211, 211, 211, 211, 211, 211, 211, 211, 211, 211, 211, 211, 211, 209, 209, 210, 209, 213, 205, 191, 207, 192, 125, 121, 213, 164, 171, 204, 207, 174, 191, 203, 214, 210, 211, 212, 212, 212, 212, 210, 210, 212, 212, 212, 212, 211, 210, 209, 149, 63, 50, 45, 54, 40, 32, 12, 13, 10, 12, 11, 13, 13, 16, 15, 33, 18, 21, 15, 32, 39, 56, 74, 74, 72, 70, 72, 74, 71, 75, 83, 78, 72, 70, 70, 74, 74, 72, 74, 72, 74, 73, 76, 74, 74, 71, 66, 69, 69, 69, 70, 71, 74, 68, 72, 74, 75, 77, 60, 79, 72, 73, 73, 75, 78, 80, 77, 73, 77, 81, 77, 80, 86, 86, 84, 79, 76, 75, 74, 75, 74, 70, 69, 67, 68, 67, 65, 64, 67, 66, 72, 64, 58, 62, 68, 62, 48, 18, 9, 13, 15, 14, 17, 18, 21, 19, 17, 26, 57, 67, 51, 33, 153, 221, 224, 221, 222, 223, 218, 217, 217, 216, 215, 218, 220, 220, 218, 216, 214, 213, 215, 214, 214, 214, 214, 214, 214, 214, 214, 214, 213, 213, 213, 212, 213, 212, 212, 212, 212, 212, 212, 212, 212, 212, 211, 211, 210, 210, 211, 210, 210, 210, 210, 210, 209, 85, 65, 69, 126, 147, 145, 100, 95, 89, 71, 103, 50, 93, 122, 93, 118, 167, 106, 95, 100, 107, 202, 149, 140, 162, 191, 182, 211, 212, 210, 209, 210, 211, 211, 211, 211, 211, 211, 211, 211, 211, 211, 211, 210, 210, 210, 211, 211, 211, 211, 211, 211, 211, 211, 211, 211, 212, 211, 211, 211, 212, 210, 211, 209, 194, 133, 128, 216, 180, 163, 195, 207, 208, 211, 211, 213, 211, 213, 214, 214, 214, 214, 211, 212, 213, 213, 214, 211, 212, 214, 207, 181, 70, 45, 48, 41, 30, 14, 13, 11, 15, 13, 11, 13, 10, 12, 32, 25, 13, 10, 11, 20, 36, 56, 68, 72, 74, 70, 73, 76, 74, 74, 79, 83, 78, 73, 75, 77, 77, 76, 74, 78, 77, 74, 76, 76, 76, 75, 73, 70, 64, 70, 71, 69, 72, 65, 68, 71, 78, 77, 70, 51, 77, 75, 69, 70, 69, 69, 73, 69, 75, 66, 67, 69, 74, 82, 85, 84, 80, 75, 73, 73, 73, 74, 76, 78, 78, 79, 78, 74, 66, 63, 67, 77, 73, 66, 74, 72, 68, 55, 32, 16, 16, 16, 16, 15, 12, 15, 18, 15, 19, 42, 63, 56, 39, 83, 222, 220, 220, 220, 221, 218, 218, 217, 217, 217, 218, 219, 218, 217, 216, 215, 214, 214, 213, 214, 214, 214, 214, 214, 214, 214, 214, 214, 213, 213, 212, 213, 212, 212, 212, 212, 212, 212, 212, 212, 211, 211, 210, 211, 212, 212, 210, 210, 210, 210, 210, 210, 103, 86, 108, 133, 167, 159, 142, 116, 54, 86, 106, 125, 141, 185, 85, 142, 148, 141, 141, 155, 114, 131, 209, 171, 161, 156, 219, 179, 194, 211, 209, 208, 211, 211, 211, 211, 211, 211, 211, 211, 211, 211, 211, 211, 211, 211, 211, 211, 211, 211, 211, 211, 211, 211, 211, 211, 211, 211, 212, 212, 211, 210, 213, 209, 185, 153, 151, 214, 209, 187, 196, 212, 212, 212, 211, 213, 213, 213, 213, 213, 213, 213, 212, 213, 213, 214, 214, 213, 212, 213, 211, 179, 71, 55, 50, 39, 24, 13, 19, 13, 11, 13, 8, 8, 11, 24, 9, 11, 11, 16, 42, 64, 75, 70, 71, 73, 76, 81, 74, 73, 73, 71, 68, 74, 75, 75, 73, 69, 67, 68, 64, 66, 74, 76, 71, 71, 72, 69, 65, 69, 74, 74, 79, 76, 78, 75, 75, 72, 75, 65, 68, 71, 71, 73, 72, 72, 73, 68, 75, 76, 75, 75, 74, 77, 78, 78, 76, 74, 74, 73, 78, 82, 77, 74, 76, 78, 79, 80, 73, 69, 69, 74, 78, 71, 77, 76, 72, 68, 51, 26, 17, 17, 21, 19, 12, 12, 14, 13, 20, 26, 42, 63, 57, 131, 228, 222, 222, 219, 221, 218, 218, 218, 218, 218, 218, 219, 218, 217, 216, 216, 215, 213, 215, 214, 214, 214, 214, 214, 214, 214, 214, 215, 213, 213, 212, 213, 212, 213, 213, 212, 212, 212, 212, 212, 212, 211, 211, 210, 210, 213, 210, 210, 210, 210, 210, 211, 110, 116, 139, 182, 171, 177, 180, 88, 108, 147, 174, 152, 165, 127, 161, 130, 140, 143, 157, 141, 170, 154, 157, 198, 166, 168, 159, 192, 210, 212, 211, 207, 211, 211, 211, 211, 211, 211, 211, 211, 211, 211, 211, 211, 211, 211, 212, 212, 212, 211, 212, 211, 211, 211, 211, 211, 210, 211, 212, 210, 211, 210, 210, 213, 193, 181, 183, 214, 211, 201, 194, 212, 213, 213, 213, 213, 213, 212, 212, 212, 212, 212, 213, 213, 213, 213, 213, 212, 212, 212, 208, 177, 69, 51, 39, 28, 16, 17, 9, 12, 13, 10, 13, 11, 13, 10, 9, 6, 13, 10, 7, 19, 37, 68, 74, 74, 68, 72, 72, 74, 79, 75, 75, 73, 72, 73, 74, 73, 71, 71, 69, 68, 70, 71, 71, 74, 72, 72, 72, 73, 74, 78, 77, 78, 74, 71, 71, 68, 66, 68, 73, 72, 65, 69, 68, 69, 67, 69, 73, 74, 69, 69, 73, 74, 78, 80, 80, 79, 78, 73, 72, 74, 76, 76, 76, 74, 71, 73, 75, 73, 77, 78, 77, 74, 73, 77, 73, 77, 76, 71, 71, 61, 29, 11, 12, 19, 21, 13, 12, 14, 11, 14, 23, 28, 59, 66, 204, 222, 220, 220, 220, 220, 218, 218, 219, 219, 220, 220, 220, 218, 216, 215, 214, 214, 214, 215, 214, 214, 214, 214, 213, 212, 213, 213, 213, 213, 213, 212, 213, 212, 213, 213, 212, 212, 212, 212, 212, 212, 211, 211, 212, 212, 211, 210, 210, 210, 209, 209, 209, 155, 162, 188, 168, 184, 209, 193, 139, 172, 148, 204, 158, 144, 160, 161, 155, 145, 150, 163, 150, 187, 175, 125, 174, 201, 171, 190, 184, 206, 211, 210, 207, 211, 211, 211, 211, 211, 211, 211, 211, 211, 211, 211, 210, 210, 211, 213, 213, 213, 212, 211, 212, 212, 211, 211, 211, 211, 211, 212, 210, 210, 210, 211, 211, 212, 212, 209, 209, 209, 211, 212, 211, 211, 213, 213, 213, 213, 213, 212, 212, 212, 212, 214, 212, 212, 212, 212, 212, 210, 210, 210, 179, 75, 57, 33, 17, 16, 13, 14, 14, 8, 13, 10, 11, 11, 12, 13, 10, 7, 31, 33, 61, 75, 76, 74, 70, 73, 73, 79, 79, 75, 76, 71, 70, 72, 73, 73, 74, 71, 70, 72, 70, 70, 74, 74, 67, 76, 78, 77, 79, 81, 78, 75, 67, 66, 69, 66, 62, 66, 76, 75, 71, 71, 70, 70, 70, 69, 71, 73, 68, 67, 73, 71, 70, 71, 74, 72, 72, 74, 76, 80, 80, 80, 81, 83, 79, 79, 75, 74, 75, 78, 81, 82, 82, 76, 73, 80, 75, 68, 74, 70, 43, 9, 13, 13, 14, 13, 10, 8, 13, 10, 11, 16, 24, 19, 49, 65, 172, 216, 218, 217, 219, 217, 220, 220, 220, 219, 218, 218, 217, 216, 214, 214, 214, 213, 215, 215, 215, 214, 214, 214, 214, 213, 213, 213, 213, 212, 213, 213, 214, 213, 213, 212, 211, 212, 212, 212, 212, 212, 212, 212, 212, 212, 211, 209, 210, 210, 208, 209, 209, 207, 208, 212, 209, 206, 210, 151, 175, 196, 187, 212, 146, 155, 162, 200, 173, 150, 144, 210, 141, 192, 176, 168, 142, 193, 202, 177, 196, 204, 210, 210, 210, 211, 211, 211, 211, 211, 211, 211, 211, 211, 210, 210, 211, 212, 212, 213, 213, 213, 212, 212, 211, 211, 211, 211, 211, 211, 211, 212, 211, 211, 211, 211, 211, 210, 213, 213, 212, 212, 210, 210, 210, 211, 213, 213, 213, 213, 213, 212, 212, 212, 212, 212, 212, 212, 210, 211, 210, 210, 210, 210, 177, 77, 56, 26, 18, 16, 12, 11, 12, 11, 11, 14, 12, 13, 11, 34, 47, 62, 71, 77, 75, 72, 73, 75, 77, 77, 76, 75, 73, 68, 69, 72, 74, 72, 74, 71, 70, 72, 74, 74, 77, 79, 80, 80, 74, 73, 74, 79, 77, 71, 66, 60, 61, 65, 65, 66, 72, 73, 71, 70, 68, 68, 69, 71, 73, 75, 68, 65, 73, 73, 70, 69, 71, 77, 78, 75, 73, 73, 74, 74, 77, 82, 81, 81, 76, 78, 75, 76, 78, 79, 79, 82, 88, 85, 83, 78, 81, 75, 57, 19, 9, 8, 13, 10, 13, 10, 14, 13, 15, 18, 23, 17, 36, 74, 149, 215, 218, 217, 218, 216, 219, 220, 220, 219, 218, 218, 216, 214, 214, 213, 213, 214, 214, 215, 214, 214, 214, 214, 214, 214, 212, 212, 213, 213, 213, 214, 214, 214, 213, 212, 212, 212, 213, 213, 212, 212, 212, 212, 212, 212, 212, 209, 210, 209, 209, 210, 210, 208, 209, 208, 209, 207, 157, 188, 206, 195, 199, 206, 154, 188, 171, 180, 199, 180, 183, 194, 161, 176, 188, 184, 183, 159, 202, 208, 197, 206, 209, 213, 211, 211, 211, 211, 211, 211, 211, 211, 211, 211, 211, 211, 211, 211, 212, 213, 213, 213, 212, 210, 211, 211, 211, 211, 211, 211, 211, 212, 212, 212, 212, 212, 212, 213, 212, 213, 213, 214, 214, 213, 213, 214, 213, 213, 213, 213, 213, 212, 212, 212, 212, 211, 211, 211, 211, 211, 210, 210, 210, 209, 176, 71, 36, 21, 12, 9, 13, 10, 13, 10, 9, 14, 11, 12, 11, 12, 20, 47, 55, 75, 79, 75, 72, 71, 68, 78, 76, 75, 77, 74, 71, 66, 71, 75, 74, 76, 78, 78, 76, 74, 76, 76, 74, 79, 80, 75, 72, 75, 73, 74, 75, 70, 63, 66, 63, 65, 66, 69, 75, 78, 74, 74, 73, 71, 72, 74, 74, 76, 78, 76, 70, 71, 71, 68, 70, 79, 80, 77, 77, 76, 77, 74, 72, 77, 75, 76, 77, 76, 77, 78, 79, 78, 79, 78, 82, 84, 80, 75, 77, 78, 71, 41, 18, 7, 5, 11, 13, 10, 12, 12, 13, 15, 21, 21, 61, 137, 218, 217, 218, 218, 218, 219, 219, 219, 218, 218, 217, 215, 215, 214, 213, 214, 215, 213, 213, 214, 214, 214, 214, 214, 214, 214, 214, 214, 214, 214, 214, 213, 212, 213, 213, 213, 213, 213, 213, 212, 212, 212, 212, 212, 212, 212, 209, 210, 210, 209, 210, 210, 209, 209, 209, 209, 205, 183, 207, 210, 208, 209, 172, 162, 190, 166, 190, 209, 186, 191, 215, 185, 177, 197, 175, 199, 184, 174, 208, 210, 210, 211, 210, 210, 211, 211, 211, 211, 211, 211, 211, 211, 211, 211, 211, 212, 212, 213, 213, 213, 213, 211, 210, 212, 211, 211, 211, 211, 212, 212, 212, 212, 212, 212, 212, 212, 213, 213, 213, 213, 214, 213, 213, 213, 213, 213, 213, 213, 213, 213, 213, 212, 212, 212, 212, 211, 211, 211, 211, 209, 211, 212, 209, 179, 45, 21, 18, 13, 10, 11, 13, 10, 11, 11, 14, 12, 12, 15, 22, 41, 53, 67, 79, 77, 72, 73, 75, 77, 79, 77, 76, 77, 74, 73, 75, 77, 76, 77, 76, 75, 76, 72, 73, 76, 77, 77, 77, 77, 74, 73, 75, 77, 77, 77, 71, 64, 66, 71, 65, 71, 80, 76, 74, 76, 72, 69, 69, 72, 72, 73, 72, 75, 79, 78, 74, 73, 72, 78, 81, 77, 77, 77, 77, 76, 74, 75, 81, 81, 78, 72, 69, 71, 75, 76, 79, 79, 77, 80, 83, 80, 72, 74, 77, 74, 60, 37, 13, 10, 4, 7, 12, 12, 11, 12, 12, 18, 21, 41, 122, 219, 214, 218, 217, 217, 218, 219, 219, 218, 217, 216, 215, 214, 213, 212, 213, 214, 214, 214, 214, 214, 214, 214, 215, 214, 212, 215, 213, 214, 214, 214, 213, 213, 213, 213, 213, 213, 213, 213, 211, 211, 212, 211, 212, 212, 211, 210, 210, 210, 210, 210, 210, 209, 209, 209, 209, 211, 209, 213, 208, 210, 210, 213, 196, 196, 200, 206, 211, 184, 199, 205, 207, 189, 211, 188, 201, 204, 206, 207, 212, 211, 212, 211, 211, 211, 211, 211, 211, 212, 212, 211, 211, 211, 211, 211, 212, 212, 213, 213, 213, 213, 211, 210, 212, 211, 211, 211, 211, 211, 212, 212, 212, 212, 212, 212, 212, 213, 213, 213, 213, 214, 214, 214, 213, 213, 213, 213, 213, 213, 213, 213, 212, 212, 212, 212, 212, 212, 211, 212, 212, 213, 213, 209, 183, 33, 20, 39, 29, 16, 12, 8, 9, 14, 11, 11, 19, 41, 41, 75, 74, 80, 73, 73, 75, 75, 79, 78, 73, 71, 78, 79, 78, 76, 78, 77, 76, 74, 74, 75, 73, 68, 70, 76, 75, 80, 76, 76, 73, 72, 75, 74, 76, 78, 76, 76, 70, 66, 67, 77, 76, 74, 74, 70, 70, 68, 71, 73, 73, 74, 72, 75, 79, 75, 74, 77, 84, 78, 76, 74, 77, 78, 77, 75, 78, 82, 77, 77, 79, 78, 75, 74, 72, 76, 74, 76, 78, 80, 81, 75, 73, 78, 76, 70, 49, 19, 6, 9, 13, 16, 17, 15, 13, 10, 13, 10, 18, 31, 99, 212, 213, 218, 219, 218, 220, 220, 218, 217, 215, 216, 215, 215, 214, 214, 213, 214, 214, 214, 214, 214, 214, 214, 214, 213, 213, 214, 213, 214, 214, 213, 213, 213, 213, 212, 212, 213, 213, 213, 211, 211, 212, 212, 211, 211, 212, 210, 210, 210, 210, 210, 210, 209, 209, 209, 209, 210, 212, 210, 208, 210, 211, 211, 213, 211, 211, 212, 210, 178, 200, 211, 209, 188, 209, 209, 209, 213, 208, 215, 210, 211, 211, 211, 210, 211, 211, 211, 211, 212, 212, 212, 211, 211, 211, 211, 212, 212, 213, 213, 213, 213, 211, 210, 212, 211, 211, 211, 211, 211, 211, 211, 211, 211, 211, 211, 211, 214, 214, 214, 214, 213, 213, 214, 213, 212, 213, 213, 213, 213, 213, 213, 213, 213, 213, 215, 213, 214, 213, 214, 214, 213, 214, 210, 209, 131, 28, 50, 26, 19, 18, 19, 15, 13, 11, 19, 32, 45, 64, 82, 77, 70, 73, 67, 71, 76, 77, 77, 77, 76, 76, 75, 76, 73, 79, 78, 74, 71, 70, 71, 70, 69, 73, 79, 79, 82, 79, 76, 76, 78, 79, 76, 79, 76, 75, 72, 68, 70, 74, 76, 76, 74, 71, 72, 72, 70, 70, 74, 72, 74, 75, 78, 80, 74, 74, 77, 83, 77, 77, 78, 78, 79, 78, 76, 79, 82, 80, 77, 78, 79, 79, 75, 67, 70, 75, 74, 80, 81, 79, 72, 69, 76, 80, 77, 56, 37, 13, 8, 17, 17, 17, 14, 9, 15, 19, 24, 64, 199, 214, 217, 218, 217, 219, 218, 218, 216, 215, 214, 214, 214, 214, 214, 214, 214, 214, 214, 214, 214, 214, 214, 213, 213, 213, 213, 213, 213, 213, 213, 213, 213, 213, 212, 212, 212, 212, 212, 211, 211, 212, 212, 211, 211, 212, 210, 210, 210, 210, 210, 210, 208, 209, 209, 210, 210, 211, 210, 211, 211, 211, 210, 211, 211, 211, 210, 210, 207, 209, 210, 212, 210, 212, 210, 209, 209, 211, 210, 211, 212, 212, 211, 211, 211, 211, 211, 211, 212, 212, 212, 212, 212, 213, 213, 213, 213, 214, 213, 212, 213, 212, 211, 211, 211, 211, 211, 210, 211, 211, 212, 212, 211, 211, 210, 211, 212, 212, 212, 212, 213, 214, 214, 212, 213, 213, 214, 214, 213, 213, 213, 213, 213, 213, 214, 214, 213, 214, 213, 212, 212, 212, 212, 209, 213, 76, 43, 31, 20, 16, 33, 28, 23, 21, 34, 48, 62, 77, 76, 66, 68, 71, 66, 69, 75, 75, 78, 76, 76, 77, 74, 74, 71, 76, 76, 70, 71, 68, 70, 73, 75, 79, 75, 73, 68, 67, 69, 73, 69, 71, 72, 75, 74, 78, 74, 68, 68, 71, 68, 68, 70, 71, 71, 71, 70, 70, 73, 71, 71, 73, 77, 76, 72, 72, 77, 83, 80, 82, 82, 80, 77, 79, 80, 80, 85, 85, 82, 80, 74, 73, 74, 78, 78, 74, 73, 78, 77, 72, 70, 72, 76, 84, 82, 69, 49, 23, 9, 17, 19, 16, 14, 11, 15, 29, 33, 38, 167, 219, 218, 219, 219, 219, 217, 216, 215, 213, 214, 214, 214, 214, 214, 214, 213, 214, 214, 215, 215, 214, 214, 213, 213, 214, 214, 213, 213, 211, 211, 211, 211, 211, 211, 210, 210, 210, 212, 212, 212, 212, 212, 210, 210, 211, 210, 210, 210, 210, 210, 210, 208, 209, 209, 211, 211, 211, 211, 211, 212, 212, 212, 212, 212, 212, 212, 212, 212, 212, 211, 212, 212, 212, 211, 211, 212, 212, 211, 211, 212, 212, 211, 211, 212, 212, 212, 212, 212, 212, 212, 212, 212, 213, 214, 214, 214, 214, 213, 212, 213, 212, 211, 211, 211, 211, 211, 211, 211, 211, 212, 211, 211, 211, 211, 212, 214, 214, 214, 214, 213, 214, 214, 213, 213, 213, 214, 214, 213, 213, 213, 213, 213, 213, 213, 213, 213, 214, 212, 212, 212, 211, 212, 210, 208, 187, 47, 25, 15, 18, 25, 11, 13, 10, 13, 10, 34, 55, 71, 76, 77, 68, 69, 72, 66, 71, 73, 77, 77, 74, 77, 78, 77, 75, 76, 76, 77, 76, 71, 72, 73, 74, 74, 71, 67, 68, 68, 66, 73, 70, 70, 72, 73, 75, 75, 74, 71, 68, 66, 67, 69, 69, 68, 69, 70, 72, 70, 73, 81, 78, 77, 74, 75, 81, 75, 74, 77, 75, 78, 81, 83, 78, 75, 77, 80, 83, 85, 80, 79, 80, 76, 76, 76, 78, 79, 82, 80, 78, 75, 82, 81, 80, 78, 83, 83, 75, 60, 44, 25, 18, 22, 18, 21, 19, 30, 34, 39, 81, 207, 219, 218, 219, 218, 216, 216, 216, 216, 214, 214, 214, 214, 214, 214, 214, 214, 214, 214, 212, 212, 212, 212, 212, 214, 214, 214, 213, 213, 211, 211, 211, 211, 211, 211, 209, 209, 210, 212, 212, 212, 212, 212, 211, 211, 212, 210, 210, 210, 210, 210, 210, 208, 209, 209, 211, 211, 211, 211, 211, 212, 212, 212, 212, 212, 212, 212, 212, 212, 212, 212, 212, 212, 212, 212, 212, 212, 211, 210, 211, 212, 212, 211, 211, 212, 212, 212, 212, 212, 212, 212, 212, 212, 213, 214, 214, 214, 214, 213, 212, 213, 212, 211, 211, 211, 211, 211, 211, 211, 212, 212, 212, 212, 212, 212, 213, 213, 213, 213, 213, 214, 214, 214, 214, 213, 213, 213, 214, 213, 213, 213, 213, 213, 213, 213, 213, 213, 214, 212, 212, 212, 211, 211, 211, 211, 217, 136, 29, 18, 16, 19, 6, 11, 16, 49, 64, 73, 66, 68, 71, 68, 67, 70, 74, 68, 69, 76, 78, 79, 83, 80, 78, 78, 72, 74, 70, 72, 70, 67, 67, 70, 67, 66, 66, 65, 61, 72, 71, 72, 71, 75, 75, 71, 75, 75, 69, 66, 67, 67, 69, 71, 70, 67, 68, 67, 69, 74, 74, 80, 80, 77, 79, 79, 76, 71, 70, 72, 79, 81, 80, 78, 78, 79, 82, 83, 84, 81, 81, 73, 73, 70, 70, 77, 80, 77, 78, 81, 81, 75, 78, 89, 86, 87, 85, 75, 61, 41, 27, 28, 30, 26, 14, 24, 30, 93, 224, 221, 217, 216, 217, 213, 214, 215, 215, 215, 215, 214, 214, 214, 214, 214, 214, 214, 213, 213, 214, 214, 213, 213, 213, 214, 214, 214, 213, 213, 211, 211, 211, 211, 211, 211, 209, 209, 210, 212, 212, 212, 212, 211, 211, 212, 212, 210, 210, 210, 210, 210, 210, 208, 209, 209, 211, 211, 211, 211, 211, 212, 212, 212, 212, 212, 212, 212, 212, 212, 212, 212, 212, 212, 212, 212, 211, 212, 213, 212, 211, 212, 212, 211, 211, 212, 212, 212, 212, 212, 212, 212, 212, 212, 213, 214, 214, 214, 214, 213, 212, 213, 212, 211, 211, 211, 211, 211, 211, 212, 212, 212, 212, 211, 210, 210, 211, 214, 214, 214, 214, 215, 213, 214, 215, 213, 212, 213, 214, 214, 213, 213, 213, 213, 213, 213, 213, 212, 213, 212, 212, 212, 210, 211, 210, 216, 210, 210, 90, 24, 16, 20, 13, 16, 26, 65, 70, 72, 65, 63, 67, 66, 65, 73, 72, 71, 65, 76, 80, 75, 77, 73, 77, 74, 75, 75, 71, 69, 71, 68, 65, 68, 66, 66, 65, 63, 62, 72, 74, 70, 67, 70, 73, 74, 77, 74, 76, 74, 69, 69, 70, 74, 70, 69, 67, 68, 68, 66, 73, 74, 77, 72, 74, 76, 80, 80, 78, 71, 71, 81, 80, 77, 79, 79, 75, 76, 78, 79, 81, 69, 68, 69, 66, 69, 73, 70, 79, 85, 83, 75, 76, 89, 91, 88, 84, 77, 72, 43, 7, 11, 9, 18, 19, 27, 66, 199, 219, 218, 216, 214, 215, 213, 214, 214, 214, 215, 214, 214, 214, 214, 214, 214, 214, 214, 213, 212, 215, 214, 214, 214, 214, 215, 215, 214, 213, 213, 211, 211, 211, 211, 211, 211, 209, 209, 210, 212, 212, 212, 212, 211, 212, 212, 212, 210, 210, 210, 210, 210, 210, 209, 209, 209, 211, 212, 212, 212, 211, 212, 212, 212, 211, 211, 211, 212, 212, 212, 212, 212, 212, 212, 212, 212, 212, 212, 212, 212, 212, 210, 211, 212, 210, 212, 212, 212, 212, 212, 211, 211, 211, 212, 213, 214, 214, 214, 214, 213, 212, 213, 212, 211, 212, 212, 212, 210, 210, 211, 212, 212, 212, 212, 212, 212, 212, 214, 214, 215, 213, 214, 214, 213, 213, 213, 213, 213, 213, 213, 213, 213, 212, 212, 213, 213, 213, 213, 212, 211, 212, 212, 211, 211, 212, 209, 213, 210, 189, 44, 21, 18, 14, 11, 49, 70, 74, 72, 65, 64, 65, 62, 70, 69, 75, 65, 68, 78, 76, 72, 81, 74, 73, 76, 75, 78, 75, 72, 73, 72, 66, 64, 67, 67, 70, 65, 65, 74, 74, 69, 67, 70, 73, 72, 70, 72, 72, 73, 72, 68, 69, 72, 72, 68, 68, 66, 66, 70, 70, 71, 71, 71, 76, 77, 77, 76, 76, 75, 75, 79, 83, 77, 73, 75, 79, 77, 77, 78, 76, 73, 69, 69, 75, 76, 75, 74, 76, 76, 70, 67, 76, 88, 92, 85, 85, 78, 76, 58, 11, 3, 12, 15, 27, 49, 194, 214, 219, 218, 216, 216, 215, 214, 214, 214, 214, 214, 214, 214, 214, 214, 214, 214, 214, 214, 214, 214, 214, 214, 214, 214, 214, 214, 214, 213, 213, 213, 211, 211, 212, 212, 210, 210, 212, 209, 209, 212, 213, 213, 212, 212, 212, 212, 212, 210, 208, 209, 210, 209, 210, 209, 209, 209, 211, 212, 212, 212, 211, 212, 212, 211, 211, 212, 212, 212, 212, 212, 212, 212, 212, 212, 212, 212, 212, 212, 212, 212, 212, 210, 211, 212, 211, 212, 212, 212, 212, 212, 212, 211, 212, 212, 213, 214, 213, 214, 214, 213, 212, 213, 212, 212, 212, 212, 211, 211, 211, 212, 212, 212, 212, 212, 212, 212, 212, 214, 214, 214, 213, 214, 214, 213, 213, 213, 213, 213, 213, 213, 213, 213, 213, 213, 213, 213, 213, 213, 213, 211, 211, 210, 210, 211, 213, 216, 210, 209, 211, 160, 29, 18, 18, 16, 61, 71, 70, 67, 65, 63, 63, 67, 73, 74, 71, 64, 67, 74, 69, 73, 83, 81, 82, 81, 77, 75, 72, 71, 72, 71, 67, 67, 69, 69, 70, 70, 71, 73, 70, 68, 67, 68, 72, 70, 66, 72, 70, 67, 68, 68, 68, 72, 72, 70, 69, 67, 67, 70, 72, 71, 73, 73, 71, 74, 75, 73, 74, 74, 76, 72, 74, 76, 75, 75, 76, 76, 79, 81, 77, 74, 74, 74, 77, 76, 73, 73, 72, 74, 76, 77, 74, 81, 89, 88, 85, 80, 82, 76, 21, 13, 10, 19, 27, 56, 203, 213, 217, 216, 217, 217, 215, 214, 212, 214, 214, 214, 214, 214, 214, 214, 214, 214, 214, 214, 214, 214, 214, 214, 214, 214, 214, 214, 214, 214, 213, 213, 213, 210, 211, 211, 211, 210, 210, 211, 210, 209, 212, 213, 213, 212, 212, 212, 212, 212, 210, 209, 209, 210, 210, 210, 209, 209, 209, 211, 211, 211, 211, 212, 213, 213, 212, 211, 210, 210, 212, 213, 213, 212, 212, 212, 212, 212, 212, 212, 212, 212, 212, 213, 211, 211, 213, 211, 212, 212, 212, 212, 212, 212, 212, 212, 212, 213, 213, 213, 214, 214, 213, 212, 213, 212, 210, 212, 212, 210, 210, 211, 210, 211, 212, 212, 212, 212, 212, 212, 214, 212, 213, 214, 214, 214, 213, 213, 213, 213, 213, 213, 213, 212, 212, 212, 212, 213, 212, 212, 212, 212, 210, 210, 209, 209, 211, 216, 212, 217, 209, 210, 210, 97, 28, 19, 14, 67, 76, 73, 64, 69, 67, 64, 66, 69, 74, 68, 68, 70, 71, 68, 75, 83, 80, 77, 71, 72, 74, 71, 72, 69, 71, 72, 74, 72, 71, 70, 70, 69, 66, 67, 69, 65, 64, 71, 68, 67, 70, 66, 65, 66, 67, 68, 75, 73, 69, 66, 65, 66, 68, 77, 76, 73, 70, 65, 70, 73, 72, 76, 74, 72, 72, 70, 70, 69, 67, 66, 68, 76, 75, 77, 76, 73, 72, 73, 77, 72, 67, 68, 69, 71, 72, 73, 82, 86, 83, 84, 84, 78, 79, 40, 19, 20, 61, 208, 217, 216, 213, 216, 218, 217, 215, 214, 212, 213, 214, 214, 214, 214, 214, 214, 214, 214, 214, 214, 214, 214, 214, 214, 214, 214, 214, 214, 214, 214, 213, 213, 212, 209, 210, 210, 209, 210, 210, 211, 210, 209, 212, 213, 213, 212, 213, 213, 212, 212, 210, 209, 209, 210, 210, 210, 212, 211, 210, 211, 211, 211, 211, 212, 212, 213, 213, 212, 212, 211, 211, 211, 211, 211, 212, 212, 212, 212, 212, 212, 212, 212, 212, 211, 212, 212, 212, 212, 212, 212, 212, 212, 213, 214, 214, 212, 212, 212, 212, 212, 211, 210, 210, 211, 211, 211, 212, 213, 213, 212, 213, 213, 212, 212, 214, 214, 214, 214, 214, 214, 214, 212, 212, 213, 213, 213, 213, 213, 213, 213, 213, 213, 213, 213, 213, 212, 212, 212, 211, 212, 212, 213, 213, 213, 213, 212, 214, 213, 213, 211, 211, 209, 208, 204, 61, 23, 16, 70, 75, 73, 68, 73, 79, 63, 68, 64, 70, 71, 71, 75, 69, 71, 73, 77, 71, 71, 73, 71, 72, 73, 70, 69, 72, 69, 72, 69, 65, 67, 66, 61, 61, 64, 67, 66, 66, 75, 75, 70, 73, 75, 74, 72, 66, 69, 74, 73, 72, 69, 69, 67, 72, 78, 81, 78, 77, 70, 70, 71, 71, 74, 66, 70, 70, 71, 72, 73, 73, 73, 76, 78, 72, 74, 77, 79, 76, 72, 72, 77, 77, 74, 69, 74, 73, 72, 74, 83, 89, 84, 85, 80, 82, 59, 19, 55, 179, 216, 215, 215, 216, 215, 215, 215, 215, 215, 215, 214, 214, 214, 214, 214, 214, 214, 214, 214, 214, 214, 213, 214, 214, 214, 214, 214, 214, 214, 214, 214, 213, 213, 214, 213, 212, 212, 213, 210, 211, 213, 211, 210, 211, 210, 210, 212, 211, 211, 211, 210, 210, 210, 210, 210, 210, 210, 210, 211, 211, 211, 211, 211, 212, 212, 211, 212, 212, 212, 212, 212, 212, 211, 211, 212, 212, 212, 212, 212, 212, 212, 212, 212, 212, 212, 212, 212, 211, 211, 212, 212, 212, 212, 212, 212, 212, 212, 212, 212, 212, 211, 212, 211, 210, 210, 210, 210, 212, 213, 213, 213, 213, 214, 213, 212, 214, 214, 214, 214, 214, 214, 213, 212, 213, 213, 212, 212, 212, 212, 212, 213, 213, 213, 213, 213, 213, 212, 212, 212, 213, 212, 211, 212, 213, 213, 213, 213, 214, 212, 213, 212, 211, 212, 207, 209, 168, 37, 25, 69, 72, 71, 71, 75, 78, 57, 53, 66, 72, 74, 74, 71, 72, 72, 70, 74, 69, 68, 68, 71, 73, 68, 66, 67, 70, 68, 68, 66, 67, 65, 65, 64, 66, 69, 69, 69, 68, 73, 74, 74, 73, 71, 69, 68, 75, 80, 74, 71, 69, 66, 65, 68, 74, 75, 72, 74, 75, 71, 73, 78, 77, 76, 72, 71, 71, 72, 71, 74, 74, 73, 78, 75, 77, 76, 74, 76, 79, 81, 78, 79, 80, 79, 71, 72, 73, 77, 80, 82, 89, 87, 84, 88, 88, 78, 51, 186, 219, 217, 216, 215, 214, 215, 215, 215, 215, 215, 214, 214, 214, 214, 214, 214, 214, 214, 214, 214, 214, 214, 213, 214, 214, 213, 214, 214, 214, 214, 214, 214, 213, 213, 212, 213, 213, 213, 212, 212, 211, 212, 212, 211, 211, 211, 211, 212, 211, 210, 210, 210, 210, 210, 210, 210, 210, 210, 209, 211, 212, 211, 211, 211, 211, 211, 210, 212, 212, 212, 212, 212, 212, 212, 212, 212, 212, 212, 211, 211, 211, 211, 212, 212, 211, 211, 211, 212, 212, 212, 213, 213, 213, 213, 212, 212, 212, 212, 212, 212, 211, 212, 212, 212, 212, 212, 212, 212, 212, 213, 213, 213, 214, 214, 213, 213, 213, 212, 212, 212, 212, 212, 213, 213, 213, 213, 212, 212, 212, 212, 212, 212, 212, 212, 212, 213, 213, 212, 212, 212, 211, 212, 213, 213, 213, 213, 213, 214, 214, 214, 214, 212, 211, 210, 211, 207, 209, 120, 27, 75, 71, 69, 71, 71, 72, 68, 46, 58, 73, 75, 74, 71, 74, 74, 72, 77, 71, 71, 71, 73, 68, 65, 66, 67, 69, 68, 68, 68, 70, 66, 67, 65, 66, 69, 66, 70, 71, 70, 71, 72, 73, 75, 77, 78, 76, 72, 70, 69, 66, 68, 67, 67, 68, 71, 73, 71, 69, 71, 71, 75, 75, 78, 78, 80, 76, 74, 76, 74, 73, 77, 75, 74, 74, 76, 78, 75, 77, 79, 78, 78, 75, 74, 71, 74, 75, 78, 83, 82, 85, 89, 86, 89, 91, 96, 197, 212, 222, 218, 216, 215, 215, 215, 215, 215, 215, 214, 213, 214, 214, 214, 214, 214, 214, 214, 214, 214, 214, 214, 213, 214, 214, 213, 213, 214, 214, 213, 213, 213, 213, 213, 212, 213, 213, 212, 212, 212, 214, 213, 211, 210, 211, 210, 210, 212, 213, 212, 211, 211, 211, 211, 210, 210, 210, 210, 209, 211, 212, 211, 211, 211, 211, 211, 212, 211, 212, 212, 212, 212, 213, 212, 212, 213, 212, 212, 212, 211, 211, 212, 210, 210, 212, 212, 212, 212, 212, 211, 213, 213, 213, 213, 211, 211, 211, 211, 212, 211, 212, 212, 212, 212, 212, 212, 212, 212, 212, 212, 211, 211, 212, 214, 214, 213, 213, 213, 213, 213, 213, 213, 211, 211, 211, 211, 210, 210, 210, 210, 210, 212, 212, 212, 212, 212, 213, 212, 212, 212, 210, 212, 213, 213, 213, 213, 213, 215, 214, 214, 213, 212, 212, 212, 208, 211, 206, 204, 76, 71, 74, 66, 69, 69, 73, 68, 44, 61, 71, 73, 75, 71, 70, 70, 70, 74, 70, 70, 70, 72, 70, 66, 65, 66, 65, 66, 70, 70, 72, 68, 66, 69, 73, 75, 68, 74, 74, 74, 79, 78, 75, 74, 76, 78, 78, 75, 72, 69, 63, 67, 66, 69, 70, 72, 72, 71, 71, 77, 77, 77, 77, 74, 75, 73, 76, 80, 79, 79, 79, 76, 77, 76, 78, 75, 76, 76, 76, 78, 79, 77, 78, 80, 72, 68, 69, 71, 76, 81, 82, 88, 88, 87, 92, 99, 185, 218, 220, 222, 216, 216, 216, 215, 215, 215, 215, 214, 213, 213, 214, 214, 214, 214, 214, 214, 214, 214, 214, 214, 213, 214, 214, 212, 213, 214, 214, 214, 213, 213, 213, 213, 212, 212, 212, 213, 213, 213, 213, 212, 212, 211, 212, 211, 211, 212, 212, 212, 212, 210, 211, 211, 211, 210, 210, 210, 207, 209, 210, 211, 210, 212, 212, 212, 212, 212, 212, 212, 212, 212, 212, 212, 212, 212, 212, 212, 212, 212, 212, 212, 212, 212, 212, 211, 212, 212, 212, 212, 213, 213, 213, 213, 211, 209, 210, 211, 211, 212, 213, 213, 213, 213, 214, 214, 214, 213, 212, 212, 211, 212, 213, 215, 215, 214, 214, 214, 213, 213, 213, 213, 211, 211, 211, 211, 210, 210, 210, 210, 210, 211, 211, 211, 211, 211, 211, 211, 211, 211, 211, 210, 211, 211, 212, 212, 212, 212, 213, 213, 212, 211, 212, 212, 212, 212, 210, 212, 181, 82, 77, 67, 63, 78, 71, 71, 44, 63, 71, 72, 74, 74, 69, 70, 64, 69, 71, 70, 66, 73, 68, 66, 66, 65, 65, 69, 71, 72, 71, 72, 76, 78, 77, 76, 72, 74, 74, 75, 75, 74, 73, 75, 75, 76, 77, 76, 72, 69, 66, 65, 64, 65, 68, 74, 73, 74, 78, 77, 74, 75, 76, 78, 83, 85, 83, 78, 75, 77, 81, 80, 79, 80, 80, 80, 76, 76, 76, 75, 76, 78, 79, 80, 79, 69, 68, 70, 72, 83, 83, 85, 91, 87, 93, 99, 170, 215, 219, 220, 217, 214, 215, 216, 214, 214, 214, 213, 213, 214, 214, 214, 214, 214, 214, 214, 214, 214, 214, 214, 214, 214, 214, 213, 213, 214, 214, 213, 213, 213, 213, 213, 213, 212, 212, 213, 214, 213, 213, 213, 212, 211, 211, 211, 211, 211, 212, 212, 212, 211, 211, 211, 211, 210, 209, 210, 208, 209, 209, 211, 211, 212, 212, 213, 214, 212, 212, 212, 212, 212, 212, 212, 212, 212, 212, 212, 212, 212, 212, 212, 212, 212, 212, 212, 212, 213, 213, 213, 212, 212, 212, 212, 211, 210, 209, 209, 212, 212, 213, 213, 213, 214, 214, 214, 214, 213, 212, 212, 211, 211, 211, 213, 213, 214, 214, 214, 213, 213, 213, 213, 211, 211, 211, 211, 211, 211, 211, 211, 211, 211, 211, 211, 211, 211, 211, 211, 211, 211, 210, 210, 210, 212, 212, 212, 211, 211, 211, 212, 212, 211, 212, 212, 212, 211, 211, 209, 206, 97, 76, 71, 66, 70, 69, 70, 54, 60, 71, 73, 73, 71, 68, 69, 65, 72, 71, 65, 71, 69, 72, 64, 67, 70, 73, 76, 75, 73, 70, 78, 76, 75, 70, 69, 72, 71, 69, 72, 76, 78, 77, 76, 75, 74, 80, 75, 71, 70, 68, 67, 70, 71, 71, 78, 77, 79, 82, 80, 73, 77, 78, 81, 81, 80, 76, 75, 74, 75, 82, 83, 80, 79, 78, 79, 80, 82, 79, 76, 76, 79, 78, 77, 84, 76, 71, 71, 73, 83, 85, 87, 90, 86, 89, 95, 139, 213, 215, 218, 214, 216, 214, 214, 217, 215, 214, 214, 214, 214, 214, 214, 214, 214, 214, 214, 214, 214, 214, 214, 214, 213, 213, 213, 213, 213, 214, 214, 213, 213, 213, 213, 212, 213, 214, 213, 213, 214, 213, 213, 213, 212, 212, 212, 212, 212, 212, 212, 212, 211, 211, 211, 211, 209, 208, 209, 209, 209, 209, 210, 211, 212, 212, 214, 214, 212, 212, 212, 212, 212, 212, 212, 212, 212, 212, 212, 212, 212, 212, 212, 212, 212, 213, 212, 213, 213, 213, 213, 212, 212, 212, 212, 209, 208, 209, 210, 211, 212, 213, 213, 214, 214, 214, 214, 214, 213, 212, 212, 212, 211, 211, 213, 213, 214, 214, 213, 213, 212, 213, 213, 212, 212, 212, 212, 211, 211, 211, 211, 212, 212, 211, 211, 211, 211, 211, 211, 211, 211, 212, 211, 211, 211, 211, 212, 211, 211, 211, 212, 212, 211, 212, 212, 212, 212, 212, 211, 206, 85, 72, 66, 66, 70, 70, 62, 37, 60, 71, 74, 73, 70, 69, 68, 67, 71, 67, 71, 67, 61, 53, 67, 75, 72, 72, 72, 70, 73, 70, 70, 74, 70, 74, 74, 73, 72, 73, 70, 71, 71, 75, 71, 73, 75, 72, 70, 69, 71, 71, 70, 68, 74, 68, 74, 75, 75, 78, 80, 84, 82, 81, 75, 77, 74, 75, 75, 77, 75, 79, 82, 83, 76, 71, 73, 70, 69, 73, 79, 80, 77, 82, 78, 75, 75, 74, 72, 72, 81, 84, 91, 91, 86, 88, 94, 115, 210, 213, 215, 215, 216, 216, 216, 218, 215, 214, 214, 214, 214, 214, 214, 214, 214, 214, 214, 214, 214, 214, 214, 214, 213, 213, 213, 213, 213, 213, 213, 213, 213, 213, 213, 213, 213, 213, 213, 213, 214, 213, 214, 214, 212, 212, 212, 212, 212, 212, 212, 212, 211, 211, 211, 211, 211, 210, 209, 208, 209, 208, 210, 212, 212, 212, 210, 211, 211, 212, 212, 212, 212, 212, 212, 211, 211, 211, 213, 211, 212, 213, 213, 213, 213, 213, 213, 213, 213, 213, 213, 212, 212, 212, 212, 213, 213, 212, 212, 213, 213, 213, 213, 213, 213, 213, 213, 213, 213, 212, 212, 212, 212, 213, 215, 215, 213, 214, 213, 213, 213, 213, 213, 212, 212, 212, 212, 212, 212, 212, 212, 212, 212, 212, 212, 212, 212, 212, 212, 212, 212, 212, 212, 212, 211, 211, 212, 211, 212, 212, 213, 213, 213, 213, 213, 212, 212, 212, 212, 204, 87, 72, 72, 70, 77, 76, 73, 46, 62, 70, 72, 69, 69, 66, 63, 64, 73, 70, 73, 76, 75, 74, 72, 66, 72, 71, 69, 68, 70, 71, 71, 72, 66, 67, 70, 70, 71, 70, 69, 71, 72, 76, 67, 65, 69, 74, 75, 73, 76, 73, 67, 59, 70, 56, 66, 72, 77, 80, 77, 85, 83, 84, 83, 79, 76, 72, 76, 74, 71, 73, 78, 84, 81, 74, 75, 74, 71, 74, 75, 79, 81, 79, 77, 76, 73, 72, 71, 71, 81, 86, 86, 86, 84, 90, 92, 104, 202, 212, 216, 216, 215, 216, 217, 215, 215, 214, 214, 214, 214, 214, 214, 214, 213, 214, 214, 214, 214, 214, 214, 214, 213, 212, 212, 211, 213, 213, 213, 213, 213, 213, 214, 212, 211, 211, 212, 212, 212, 212, 212, 212, 212, 211, 212, 211, 212, 212, 213, 212, 211, 210, 210, 211, 211, 211, 210, 209, 209, 209, 211, 212, 212, 212, 210, 211, 211, 212, 212, 212, 212, 212, 212, 211, 211, 210, 212, 210, 212, 212, 213, 213, 213, 213, 213, 213, 213, 213, 213, 214, 214, 214, 214, 213, 213, 213, 213, 214, 213, 213, 213, 213, 212, 212, 212, 212, 212, 213, 212, 212, 212, 214, 215, 215, 214, 214, 213, 213, 213, 213, 213, 212, 212, 212, 212, 212, 212, 212, 212, 212, 212, 212, 212, 212, 212, 212, 212, 212, 212, 212, 212, 212, 211, 212, 212, 212, 212, 213, 213, 213, 213, 213, 213, 212, 212, 212, 212, 200, 87, 70, 65, 66, 73, 76, 67, 53, 57, 72, 72, 66, 67, 68, 68, 71, 81, 68, 63, 70, 79, 76, 76, 73, 66, 68, 73, 74, 74, 74, 76, 72, 68, 69, 73, 74, 73, 72, 70, 69, 67, 79, 69, 66, 67, 80, 76, 67, 65, 55, 53, 43, 47, 13, 10, 26, 42, 54, 39, 78, 89, 78, 73, 73, 80, 85, 85, 84, 78, 75, 73, 75, 81, 75, 71, 72, 71, 70, 72, 72, 74, 76, 78, 75, 74, 74, 76, 78, 77, 81, 88, 86, 85, 84, 89, 97, 97, 193, 210, 217, 216, 216, 216, 215, 214, 214, 214, 214, 214, 214, 214, 214, 214, 213, 214, 214, 214, 214, 214, 214, 214, 213, 212, 213, 212, 215, 213, 212, 213, 213, 213, 214, 215, 212, 212, 212, 212, 212, 212, 212, 212, 212, 211, 212, 212, 213, 212, 212, 212, 212, 212, 211, 211, 210, 210, 210, 209, 210, 209, 211, 212, 212, 212, 210, 211, 211, 212, 212, 212, 212, 212, 212, 212, 212, 211, 213, 211, 212, 213, 213, 213, 213, 213, 213, 213, 213, 213, 213, 213, 213, 213, 213, 213, 213, 213, 213, 214, 213, 213, 213, 213, 213, 213, 213, 213, 213, 213, 213, 212, 213, 214, 215, 215, 214, 214, 214, 214, 214, 214, 213, 212, 212, 212, 212, 212, 212, 212, 212, 212, 212, 212, 212, 212, 212, 212, 212, 212, 212, 212, 212, 212, 211, 211, 211, 211, 211, 212, 213, 213, 213, 213, 213, 212, 212, 212, 211, 200, 89, 74, 67, 68, 77, 75, 68, 49, 55, 71, 69, 66, 65, 66, 68, 71, 77, 77, 75, 71, 70, 75, 78, 71, 73, 78, 75, 75, 72, 70, 72, 71, 73, 71, 70, 69, 68, 71, 75, 75, 74, 71, 72, 59, 68, 55, 47, 50, 31, 60, 51, 60, 62, 65, 66, 66, 63, 42, 48, 39, 65, 51, 81, 74, 82, 81, 83, 80, 80, 78, 80, 79, 76, 71, 70, 71, 71, 70, 71, 72, 74, 78, 76, 73, 72, 72, 76, 78, 83, 85, 87, 87, 86, 85, 95, 101, 178, 211, 216, 215, 216, 215, 214, 214, 213, 213, 213, 214, 214, 214, 214, 214, 213, 214, 214, 214, 214, 214, 214, 213, 213, 213, 214, 213, 214, 213, 212, 213, 213, 213, 214, 214, 212, 212, 212, 212, 212, 212, 212, 212, 212, 211, 212, 211, 212, 211, 212, 212, 211, 211, 211, 211, 210, 210, 210, 210, 210, 210, 212, 212, 212, 212, 211, 212, 211, 212, 212, 212, 211, 213, 213, 211, 212, 213, 213, 213, 213, 213, 213, 213, 213, 213, 213, 213, 213, 213, 213, 213, 213, 213, 213, 213, 213, 213, 213, 212, 213, 213, 213, 213, 214, 214, 214, 214, 214, 213, 213, 213, 213, 213, 213, 213, 213, 213, 213, 213, 213, 213, 213, 213, 213, 213, 212, 210, 211, 212, 211, 211, 212, 212, 212, 212, 212, 213, 213, 214, 214, 212, 212, 213, 212, 211, 212, 211, 211, 211, 213, 213, 213, 213, 213, 213, 212, 212, 211, 196, 86, 76, 69, 68, 71, 79, 67, 42, 57, 69, 67, 64, 62, 69, 70, 71, 74, 74, 76, 75, 72, 73, 72, 73, 70, 80, 82, 78, 73, 73, 75, 76, 72, 78, 70, 74, 71, 72, 71, 57, 61, 37, 59, 40, 50, 53, 60, 69, 70, 69, 71, 74, 77, 65, 67, 71, 73, 70, 75, 71, 65, 55, 66, 41, 64, 56, 79, 84, 78, 75, 75, 77, 78, 74, 77, 73, 71, 69, 69, 71, 71, 77, 76, 75, 74, 73, 74, 76, 83, 85, 89, 89, 85, 82, 90, 97, 158, 211, 217, 215, 215, 215, 214, 215, 214, 214, 214, 214, 214, 214, 214, 214, 214, 213, 214, 214, 214, 214, 213, 213, 213, 214, 214, 213, 213, 213, 213, 213, 213, 213, 214, 213, 211, 211, 212, 212, 211, 211, 211, 211, 214, 212, 211, 210, 211, 211, 210, 211, 212, 210, 210, 211, 211, 211, 210, 210, 210, 210, 212, 212, 212, 212, 211, 212, 212, 212, 212, 212, 212, 213, 213, 211, 212, 213, 213, 213, 213, 213, 213, 213, 213, 213, 213, 213, 213, 213, 213, 213, 213, 213, 213, 213, 213, 214, 213, 213, 213, 213, 213, 213, 213, 214, 214, 214, 213, 213, 213, 213, 213, 213, 213, 213, 213, 213, 214, 214, 214, 214, 214, 213, 213, 213, 212, 213, 212, 212, 212, 212, 212, 212, 213, 212, 212, 212, 213, 213, 213, 213, 213, 213, 211, 211, 213, 213, 212, 213, 213, 213, 213, 213, 213, 212, 212, 212, 212, 195, 90, 80, 70, 67, 72, 79, 65, 38, 58, 64, 67, 64, 70, 70, 70, 73, 75, 75, 76, 73, 69, 68, 70, 72, 75, 74, 75, 74, 77, 77, 73, 75, 74, 67, 61, 53, 63, 25, 56, 39, 57, 44, 70, 69, 73, 74, 70, 66, 70, 71, 63, 67, 72, 62, 54, 69, 71, 79, 82, 77, 76, 74, 76, 65, 61, 47, 43, 45, 73, 57, 75, 79, 82, 69, 72, 78, 78, 77, 74, 74, 72, 81, 80, 74, 72, 71, 75, 72, 74, 86, 91, 88, 86, 84, 87, 97, 138, 209, 215, 215, 215, 215, 215, 215, 215, 214, 213, 213, 214, 214, 214, 214, 214, 214, 213, 212, 215, 214, 213, 213, 214, 214, 214, 213, 213, 213, 213, 213, 213, 213, 214, 213, 211, 212, 212, 212, 212, 212, 212, 212, 210, 210, 210, 211, 212, 211, 211, 211, 211, 211, 211, 211, 211, 211, 210, 210, 210, 210, 212, 212, 212, 212, 212, 213, 213, 213, 213, 212, 212, 213, 213, 212, 212, 213, 213, 213, 213, 213, 213, 213, 213, 214, 213, 213, 213, 214, 214, 213, 213, 213, 213, 214, 214, 214, 213, 213, 213, 213, 213, 213, 213, 213, 214, 214, 213, 213, 213, 213, 213, 213, 213, 213, 213, 213, 212, 212, 212, 212, 212, 213, 213, 213, 212, 213, 213, 212, 212, 213, 212, 213, 213, 212, 213, 212, 212, 212, 212, 212, 212, 212, 213, 213, 213, 214, 213, 214, 213, 213, 213, 212, 212, 212, 212, 212, 212, 191, 87, 76, 72, 70, 72, 76, 69, 40, 62, 68, 70, 67, 73, 69, 68, 69, 70, 74, 76, 74, 71, 67, 68, 71, 71, 78, 78, 53, 60, 59, 66, 45, 63, 29, 58, 52, 59, 58, 74, 71, 74, 68, 73, 69, 71, 70, 68, 69, 69, 64, 56, 55, 48, 11, 22, 59, 61, 58, 69, 72, 75, 73, 79, 71, 71, 72, 69, 53, 58, 47, 52, 39, 68, 66, 73, 76, 76, 77, 79, 80, 78, 82, 79, 75, 77, 76, 74, 76, 77, 84, 92, 87, 87, 85, 85, 96, 119, 209, 215, 215, 215, 215, 214, 214, 214, 214, 213, 213, 214, 214, 214, 214, 214, 213, 214, 214, 213, 213, 214, 213, 214, 214, 214, 213, 213, 213, 213, 212, 212, 213, 213, 213, 211, 211, 211, 211, 211, 211, 211, 211, 212, 212, 211, 210, 210, 211, 212, 212, 211, 211, 211, 212, 211, 211, 210, 210, 210, 210, 212, 212, 212, 212, 212, 213, 213, 213, 213, 213, 213, 213, 213, 213, 213, 213, 213, 213, 213, 213, 213, 213, 213, 214, 213, 213, 213, 214, 214, 214, 214, 214, 214, 214, 214, 215, 215, 214, 216, 215, 215, 215, 214, 213, 214, 213, 213, 213, 213, 213, 213, 213, 213, 213, 213, 213, 213, 213, 213, 213, 213, 213, 213, 213, 212, 212, 213, 213, 213, 213, 213, 213, 213, 213, 213, 212, 212, 211, 211, 212, 213, 211, 212, 214, 214, 214, 212, 212, 213, 213, 212, 212, 212, 213, 212, 212, 211, 189, 86, 74, 71, 70, 74, 72, 63, 49, 61, 70, 71, 72, 68, 70, 68, 67, 71, 78, 82, 78, 73, 62, 65, 72, 67, 59, 71, 39, 64, 39, 64, 47, 69, 71, 71, 71, 75, 74, 73, 71, 72, 68, 61, 65, 66, 58, 44, 37, 36, 47, 63, 68, 71, 77, 72, 73, 70, 62, 51, 43, 45, 56, 73, 71, 72, 75, 69, 73, 73, 78, 68, 58, 45, 43, 51, 54, 65, 70, 81, 81, 77, 77, 78, 79, 81, 80, 80, 79, 76, 85, 95, 89, 86, 84, 86, 95, 111, 201, 215, 215, 215, 214, 214, 214, 213, 213, 213, 214, 214, 214, 214, 214, 214, 214, 214, 214, 213, 214, 213, 213, 215, 214, 214, 213, 213, 213, 212, 212, 212, 212, 213, 213, 211, 211, 211, 211, 211, 211, 211, 211, 212, 212, 213, 212, 211, 211, 211, 211, 211, 211, 211, 211, 210, 210, 210, 210, 210, 210, 212, 212, 212, 212, 212, 213, 213, 213, 213, 213, 213, 213, 213, 213, 213, 213, 213, 214, 213, 213, 213, 213, 213, 214, 214, 213, 213, 214, 214, 214, 214, 214, 214, 214, 214, 213, 214, 216, 215, 215, 215, 214, 214, 215, 215, 215, 215, 213, 213, 213, 214, 214, 214, 213, 213, 214, 213, 213, 213, 213, 213, 213, 213, 213, 213, 213, 213, 213, 213, 213, 213, 213, 213, 213, 213, 213, 213, 212, 212, 213, 213, 213, 213, 213, 213, 213, 213, 213, 213, 213, 212, 212, 212, 212, 212, 211, 212, 190, 86, 71, 70, 69, 70, 71, 61, 43, 59, 69, 73, 74, 72, 73, 67, 68, 83, 76, 78, 73, 64, 58, 51, 48, 61, 49, 77, 62, 81, 75, 71, 70, 71, 67, 75, 74, 73, 75, 76, 73, 54, 11, 47, 72, 59, 62, 63, 64, 64, 63, 43, 22, 14, 57, 75, 54, 24, 46, 66, 73, 76, 66, 46, 38, 63, 62, 61, 77, 78, 80, 81, 81, 82, 77, 54, 65, 46, 42, 49, 62, 71, 77, 75, 71, 79, 78, 82, 82, 79, 83, 91, 88, 87, 84, 80, 86, 97, 188, 211, 214, 215, 215, 214, 214, 213, 213, 214, 214, 214, 214, 214, 214, 214, 214, 214, 213, 213, 214, 214, 214, 214, 214, 214, 213, 213, 213, 212, 210, 210, 211, 211, 212, 212, 210, 210, 211, 211, 211, 211, 211, 212, 212, 212, 212, 212, 211, 211, 211, 211, 211, 210, 210, 209, 209, 210, 209, 209, 209, 211, 212, 212, 212, 212, 213, 213, 213, 213, 213, 213, 213, 214, 214, 213, 213, 214, 214, 214, 213, 214, 214, 214, 213, 213, 213, 213, 213, 214, 215, 215, 215, 215, 214, 214, 213, 214, 215, 215, 215, 215, 214, 214, 215, 215, 215, 215, 213, 213, 213, 213, 214, 214, 213, 214, 214, 214, 214, 214, 214, 214, 214, 214, 214, 214, 213, 213, 213, 213, 213, 213, 213, 213, 213, 213, 213, 213, 213, 213, 213, 213, 213, 213, 213, 213, 213, 213, 213, 213, 213, 212, 212, 212, 211, 212, 211, 210, 187, 85, 77, 68, 68, 66, 70, 64, 46, 61, 71, 72, 70, 67, 66, 71, 60, 67, 53, 45, 54, 43, 53, 63, 59, 75, 74, 80, 79, 75, 69, 71, 72, 70, 71, 70, 64, 52, 51, 59, 68, 48, 38, 69, 67, 61, 41, 24, 34, 42, 17, 23, 31, 58, 56, 66, 68, 61, 17, 19, 25, 53, 52, 70, 73, 73, 43, 8, 49, 83, 77, 78, 74, 75, 78, 78, 77, 79, 73, 62, 66, 49, 50, 48, 65, 63, 75, 77, 79, 79, 80, 87, 88, 89, 88, 83, 85, 90, 170, 214, 213, 213, 214, 214, 214, 213, 214, 214, 214, 214, 214, 214, 214, 214, 214, 214, 214, 213, 214, 214, 214, 214, 213, 213, 213, 213, 213, 211, 210, 210, 211, 211, 212, 212, 210, 210, 211, 211, 211, 211, 211, 211, 211, 211, 211, 211, 211, 211, 211, 211, 211, 210, 210, 209, 209, 210, 210, 210, 210, 212, 212, 212, 212, 213, 214, 214, 214, 213, 213, 213, 214, 214, 215, 214, 214, 214, 214, 214, 214, 214, 213, 213, 214, 212, 215, 213, 212, 215, 215, 215, 215, 215, 215, 215, 215, 215, 215, 215, 215, 215, 215, 215, 215, 215, 215, 215, 213, 213, 213, 213, 214, 214, 215, 214, 214, 213, 214, 214, 214, 214, 214, 214, 214, 214, 214, 214, 213, 213, 213, 213, 213, 213, 213, 213, 213, 213, 213, 213, 213, 213, 213, 213, 213, 213, 213, 213, 213, 213, 213, 213, 213, 213, 212, 212, 211, 212, 182, 85, 75, 66, 65, 66, 71, 64, 49, 71, 73, 72, 73, 70, 70, 62, 36, 51, 51, 65, 64, 78, 73, 67, 71, 69, 70, 69, 71, 62, 65, 68, 56, 44, 36, 43, 55, 66, 69, 71, 63, 65, 67, 64, 17, 23, 32, 52, 62, 64, 62, 59, 50, 61, 50, 73, 67, 45, 40, 62, 71, 71, 61, 22, 20, 29, 60, 72, 80, 81, 59, 48, 41, 61, 75, 74, 79, 80, 78, 76, 81, 77, 77, 49, 60, 42, 51, 49, 70, 68, 74, 83, 88, 91, 89, 85, 87, 92, 152, 213, 212, 212, 213, 214, 214, 214, 214, 214, 214, 214, 214, 214, 214, 214, 214, 214, 214, 214, 214, 214, 214, 213, 213, 212, 213, 213, 212, 211, 211, 211, 211, 211, 212, 212, 210, 210, 211, 211, 211, 211, 211, 211, 211, 211, 211, 211, 211, 211, 211, 211, 211, 210, 209, 209, 209, 209, 210, 211, 211, 212, 212, 212, 212, 211, 212, 213, 213, 213, 213, 212, 214, 214, 214, 214, 214, 214, 214, 214, 214, 214, 215, 213, 213, 214, 214, 213, 214, 215, 215, 215, 215, 214, 215, 216, 216, 216, 215, 215, 215, 216, 216, 215, 215, 215, 215, 214, 212, 213, 213, 213, 213, 214, 214, 214, 214, 215, 214, 214, 214, 214, 214, 215, 214, 214, 214, 214, 213, 213, 213, 213, 213, 213, 213, 212, 213, 214, 214, 213, 213, 213, 213, 213, 213, 213, 213, 214, 214, 214, 213, 213, 213, 213, 212, 213, 211, 212, 180, 80, 80, 68, 63, 70, 72, 63, 54, 75, 73, 71, 70, 69, 69, 55, 60, 71, 77, 69, 73, 75, 70, 69, 67, 69, 68, 68, 28, 3, 41, 63, 68, 66, 60, 63, 66, 50, 16, 7, 11, 54, 71, 66, 41, 42, 46, 61, 64, 70, 63, 72, 63, 58, 45, 68, 64, 44, 66, 63, 70, 63, 71, 54, 27, 38, 41, 65, 64, 52, 75, 84, 89, 84, 52, 35, 58, 78, 75, 70, 83, 77, 72, 73, 79, 81, 83, 47, 58, 46, 53, 70, 89, 90, 90, 91, 81, 93, 138, 214, 212, 213, 212, 214, 213, 214, 213, 213, 214, 214, 215, 215, 215, 215, 214, 214, 214, 214, 214, 213, 213, 214, 213, 214, 213, 213, 212, 211, 211, 212, 210, 210, 212, 210, 209, 210, 212, 211, 211, 211, 211, 212, 211, 211, 211, 210, 211, 211, 211, 211, 211, 210, 210, 209, 209, 209, 209, 209, 210, 213, 213, 213, 212, 211, 212, 212, 213, 214, 214, 214, 214, 214, 214, 214, 214, 214, 214, 214, 214, 214, 215, 215, 213, 214, 214, 215, 214, 214, 215, 215, 215, 214, 215, 216, 216, 216, 217, 216, 216, 216, 216, 216, 216, 216, 216, 215, 214, 215, 215, 215, 214, 214, 214, 214, 214, 215, 214, 214, 214, 214, 214, 215, 214, 214, 214, 214, 213, 213, 213, 212, 213, 213, 213, 212, 213, 214, 214, 213, 212, 212, 212, 213, 213, 213, 213, 214, 214, 214, 213, 213, 213, 213, 212, 213, 211, 212, 180, 86, 76, 62, 60, 65, 70, 63, 62, 68, 71, 72, 71, 70, 56, 57, 71, 78, 67, 71, 70, 71, 65, 55, 40, 40, 57, 64, 56, 52, 70, 57, 43, 25, 18, 43, 60, 49, 37, 22, 53, 60, 73, 65, 45, 66, 70, 68, 66, 72, 72, 68, 56, 22, 43, 68, 64, 30, 39, 69, 72, 73, 72, 74, 68, 50, 39, 65, 63, 54, 38, 31, 32, 55, 66, 73, 84, 82, 55, 5, 35, 74, 76, 76, 74, 78, 75, 76, 78, 69, 64, 62, 88, 89, 90, 89, 91, 91, 121, 216, 214, 215, 213, 214, 213, 214, 213, 213, 213, 213, 213, 213, 213, 213, 213, 213, 213, 213, 214, 212, 212, 213, 212, 213, 213, 213, 213, 211, 211, 212, 210, 210, 210, 211, 211, 211, 210, 211, 211, 211, 211, 211, 210, 211, 212, 211, 211, 211, 211, 211, 211, 210, 210, 209, 209, 210, 209, 210, 210, 213, 213, 213, 213, 212, 213, 213, 214, 214, 214, 214, 214, 214, 214, 214, 214, 214, 214, 214, 214, 214, 215, 215, 214, 214, 215, 215, 215, 215, 215, 215, 215, 214, 215, 215, 216, 216, 216, 217, 216, 216, 216, 215, 216, 216, 216, 215, 215, 215, 215, 214, 214, 214, 214, 215, 215, 215, 214, 214, 214, 214, 215, 215, 214, 214, 214, 214, 213, 214, 214, 212, 213, 213, 213, 212, 213, 214, 214, 213, 213, 213, 213, 213, 213, 213, 213, 213, 213, 213, 213, 213, 213, 214, 213, 213, 212, 213, 175, 83, 63, 59, 69, 66, 69, 64, 65, 68, 72, 71, 69, 62, 55, 65, 50, 55, 68, 45, 39, 46, 65, 70, 75, 72, 61, 40, 58, 71, 55, 20, 29, 24, 56, 73, 68, 63, 77, 55, 54, 50, 67, 71, 45, 66, 73, 75, 70, 71, 72, 40, 6, 41, 44, 74, 68, 53, 14, 31, 67, 70, 72, 74, 71, 71, 53, 64, 67, 58, 22, 45, 78, 86, 62, 25, 25, 47, 67, 61, 67, 80, 55, 46, 65, 73, 73, 77, 76, 74, 71, 74, 73, 89, 89, 91, 91, 91, 108, 210, 214, 212, 213, 213, 215, 214, 213, 213, 213, 213, 213, 213, 213, 213, 212, 212, 212, 212, 213, 213, 212, 213, 212, 213, 213, 213, 213, 212, 211, 212, 210, 210, 211, 211, 212, 211, 211, 211, 211, 211, 211, 211, 210, 211, 212, 211, 211, 211, 211, 211, 211, 210, 210, 210, 210, 210, 211, 211, 211, 212, 213, 212, 213, 213, 215, 214, 215, 215, 214, 214, 214, 214, 214, 214, 214, 214, 214, 214, 214, 215, 215, 216, 215, 216, 215, 215, 215, 216, 215, 215, 215, 214, 215, 215, 215, 215, 215, 215, 215, 216, 216, 215, 215, 215, 215, 214, 216, 216, 215, 214, 214, 214, 215, 215, 215, 215, 214, 214, 214, 214, 215, 215, 214, 214, 214, 214, 214, 214, 214, 213, 213, 213, 213, 212, 213, 214, 214, 213, 214, 214, 214, 215, 214, 213, 213, 213, 213, 213, 213, 213, 213, 214, 213, 213, 212, 212, 169, 78, 67, 61, 57, 67, 68, 66, 63, 76, 72, 71, 65, 50, 67, 58, 20, 32, 68, 69, 67, 69, 65, 45, 14, 8, 15, 26, 51, 64, 55, 45, 47, 58, 69, 69, 66, 65, 61, 66, 31, 48, 72, 70, 24, 18, 23, 56, 66, 69, 35, 22, 53, 66, 57, 73, 70, 69, 60, 33, 30, 64, 76, 72, 50, 21, 35, 74, 70, 56, 67, 73, 76, 81, 80, 75, 31, 45, 42, 73, 77, 73, 71, 77, 67, 49, 33, 58, 72, 69, 71, 84, 73, 85, 88, 90, 86, 94, 104, 197, 215, 214, 215, 213, 215, 213, 213, 213, 213, 213, 213, 213, 213, 213, 212, 212, 212, 212, 213, 213, 213, 213, 213, 213, 213, 213, 213, 212, 211, 212, 211, 210, 211, 211, 211, 211, 211, 211, 211, 211, 211, 211, 210, 211, 212, 211, 211, 211, 211, 211, 211, 210, 210, 210, 210, 209, 209, 210, 210, 210, 213, 212, 214, 215, 214, 214, 214, 214, 214, 214, 215, 214, 214, 214, 215, 215, 214, 214, 214, 214, 214, 215, 215, 215, 214, 213, 214, 215, 215, 215, 215, 215, 215, 215, 215, 215, 215, 215, 214, 213, 213, 213, 214, 215, 215, 215, 214, 214, 214, 215, 215, 215, 215, 216, 216, 216, 215, 215, 214, 214, 214, 214, 214, 213, 213, 214, 214, 214, 214, 214, 214, 213, 213, 213, 213, 213, 213, 213, 213, 213, 213, 213, 214, 213, 213, 213, 212, 210, 211, 212, 213, 213, 212, 211, 211, 209, 159, 71, 70, 66, 65, 71, 66, 65, 66, 75, 77, 71, 61, 68, 75, 60, 60, 66, 33, 22, 16, 27, 67, 71, 58, 29, 8, 45, 56, 67, 65, 44, 71, 71, 66, 60, 64, 65, 66, 31, 28, 50, 70, 68, 36, 56, 47, 53, 44, 60, 54, 63, 69, 67, 67, 26, 30, 61, 72, 72, 63, 57, 57, 34, 29, 46, 45, 72, 72, 32, 43, 72, 78, 72, 73, 69, 71, 60, 46, 73, 78, 37, 25, 24, 38, 62, 74, 74, 65, 73, 44, 28, 76, 80, 93, 92, 91, 92, 98, 170, 210, 214, 216, 217, 213, 212, 211, 212, 216, 214, 213, 213, 212, 212, 213, 213, 212, 212, 211, 211, 212, 212, 212, 212, 212, 212, 212, 212, 213, 213, 212, 212, 211, 210, 210, 210, 210, 210, 210, 210, 210, 210, 210, 210, 210, 211, 211, 211, 211, 210, 210, 210, 210, 210, 210, 210, 209, 210, 211, 211, 213, 213, 215, 213, 214, 214, 214, 214, 214, 214, 215, 214, 214, 214, 216, 216, 216, 216, 216, 216, 215, 215, 215, 215, 215, 215, 215, 215, 215, 215, 215, 215, 215, 215, 215, 215, 215, 215, 214, 214, 214, 214, 214, 215, 215, 215, 216, 215, 215, 216, 216, 216, 216, 216, 216, 216, 216, 215, 215, 214, 213, 214, 215, 214, 215, 214, 213, 214, 215, 214, 214, 214, 213, 212, 213, 213, 213, 213, 213, 213, 213, 213, 213, 212, 212, 213, 212, 212, 213, 213, 214, 215, 213, 213, 211, 211, 156, 75, 67, 69, 69, 70, 69, 63, 65, 66, 66, 60, 72, 70, 57, 64, 68, 72, 43, 33, 30, 63, 68, 70, 71, 68, 63, 50, 49, 67, 60, 19, 42, 68, 72, 63, 62, 61, 14, 14, 57, 56, 67, 64, 58, 69, 72, 73, 71, 62, 39, 33, 39, 59, 71, 48, 42, 64, 62, 50, 55, 68, 76, 80, 78, 72, 51, 65, 72, 63, 35, 32, 79, 77, 80, 81, 82, 79, 57, 70, 70, 59, 30, 18, 62, 68, 50, 23, 34, 60, 75, 57, 78, 80, 83, 92, 92, 96, 96, 146, 212, 214, 214, 216, 215, 212, 211, 212, 216, 214, 213, 213, 213, 213, 213, 213, 213, 212, 212, 212, 212, 212, 212, 212, 212, 212, 213, 213, 213, 213, 212, 212, 213, 209, 210, 210, 209, 210, 210, 210, 210, 210, 210, 210, 210, 211, 211, 211, 211, 210, 211, 210, 210, 210, 210, 210, 210, 211, 211, 211, 212, 214, 213, 214, 214, 214, 214, 214, 214, 214, 215, 214, 214, 214, 215, 215, 215, 216, 216, 215, 215, 216, 216, 215, 215, 216, 215, 215, 215, 215, 215, 215, 215, 215, 215, 215, 215, 215, 215, 215, 215, 215, 215, 214, 214, 215, 215, 215, 215, 216, 216, 216, 215, 215, 215, 216, 216, 215, 215, 215, 214, 215, 214, 214, 214, 214, 214, 214, 213, 214, 214, 214, 214, 212, 212, 213, 213, 214, 212, 213, 213, 212, 212, 211, 211, 213, 212, 211, 212, 212, 213, 214, 211, 212, 209, 211, 151, 74, 65, 69, 68, 70, 71, 61, 51, 68, 52, 61, 71, 74, 63, 36, 69, 61, 58, 61, 64, 63, 63, 67, 65, 66, 60, 21, 43, 67, 60, 37, 28, 3, 30, 56, 51, 23, 45, 69, 66, 76, 61, 59, 67, 64, 40, 36, 42, 59, 70, 74, 76, 81, 78, 73, 71, 76, 80, 73, 74, 63, 59, 47, 57, 72, 76, 73, 72, 70, 64, 26, 24, 67, 77, 80, 78, 43, 35, 75, 69, 48, 55, 77, 80, 77, 74, 68, 44, 41, 36, 78, 73, 84, 84, 89, 90, 93, 96, 125, 211, 215, 215, 216, 215, 212, 211, 212, 216, 214, 213, 213, 213, 213, 213, 213, 213, 213, 213, 212, 212, 212, 212, 212, 212, 213, 213, 213, 214, 214, 213, 212, 213, 209, 210, 210, 208, 210, 210, 210, 210, 210, 210, 210, 210, 211, 210, 210, 211, 210, 211, 210, 210, 209, 210, 211, 210, 211, 211, 211, 213, 213, 214, 214, 214, 213, 214, 214, 214, 214, 214, 214, 214, 214, 214, 215, 215, 215, 215, 215, 216, 216, 216, 216, 216, 216, 216, 216, 216, 215, 214, 215, 215, 215, 215, 215, 215, 216, 216, 215, 215, 215, 216, 215, 215, 216, 217, 216, 216, 215, 215, 216, 216, 216, 215, 215, 216, 216, 215, 215, 215, 215, 215, 214, 214, 214, 214, 214, 214, 214, 214, 214, 214, 213, 213, 213, 213, 213, 213, 213, 213, 213, 212, 212, 212, 213, 212, 212, 213, 213, 214, 214, 212, 212, 210, 208, 147, 74, 67, 68, 71, 68, 68, 63, 62, 49, 62, 71, 68, 61, 41, 33, 70, 75, 59, 72, 68, 65, 65, 64, 67, 62, 16, 44, 52, 71, 63, 45, 59, 54, 57, 53, 63, 68, 67, 67, 74, 55, 11, 11, 57, 67, 65, 73, 74, 75, 76, 75, 74, 78, 81, 76, 72, 77, 83, 79, 81, 78, 85, 81, 71, 69, 72, 49, 25, 63, 78, 84, 66, 47, 65, 35, 8, 22, 41, 66, 73, 47, 42, 76, 75, 79, 74, 75, 60, 60, 53, 77, 59, 81, 80, 85, 89, 93, 96, 111, 211, 213, 217, 217, 213, 212, 211, 212, 216, 215, 214, 213, 213, 214, 213, 213, 213, 213, 213, 213, 213, 213, 213, 214, 213, 213, 213, 212, 212, 213, 212, 211, 213, 209, 210, 211, 210, 210, 210, 210, 210, 210, 211, 211, 211, 210, 210, 209, 210, 210, 210, 209, 209, 209, 210, 211, 210, 211, 211, 211, 214, 213, 214, 214, 214, 214, 215, 215, 215, 215, 214, 214, 215, 214, 216, 215, 215, 214, 214, 215, 216, 216, 216, 217, 217, 217, 217, 217, 216, 215, 215, 215, 215, 215, 215, 215, 215, 216, 216, 216, 215, 214, 215, 217, 216, 216, 217, 217, 217, 216, 216, 216, 215, 216, 215, 215, 216, 215, 215, 215, 215, 215, 215, 214, 214, 214, 214, 214, 214, 214, 214, 214, 214, 213, 213, 213, 213, 213, 213, 213, 213, 213, 213, 213, 213, 214, 213, 212, 213, 213, 214, 214, 212, 211, 210, 209, 138, 74, 72, 67, 69, 69, 63, 65, 47, 49, 66, 69, 61, 61, 48, 32, 67, 77, 15, 32, 66, 75, 71, 69, 45, 13, 10, 32, 58, 58, 68, 66, 69, 69, 68, 64, 52, 37, 29, 37, 57, 72, 64, 64, 67, 69, 64, 62, 68, 76, 74, 77, 76, 72, 71, 57, 55, 31, 61, 59, 79, 73, 76, 76, 79, 79, 82, 81, 75, 55, 61, 74, 59, 63, 82, 80, 70, 70, 60, 42, 59, 69, 67, 38, 26, 67, 74, 79, 79, 78, 73, 58, 74, 54, 62, 84, 75, 91, 92, 91, 107, 203, 214, 216, 216, 214, 212, 211, 212, 216, 215, 214, 213, 213, 214, 213, 213, 213, 213, 213, 213, 213, 213, 213, 213, 213, 214, 213, 212, 212, 213, 212, 211, 213, 209, 210, 211, 210, 211, 210, 210, 210, 210, 210, 211, 210, 210, 210, 210, 210, 210, 210, 210, 209, 210, 210, 211, 210, 211, 212, 212, 214, 215, 216, 216, 215, 215, 215, 215, 213, 213, 214, 215, 215, 215, 215, 215, 215, 214, 214, 215, 216, 216, 216, 216, 216, 216, 216, 216, 216, 216, 216, 215, 215, 215, 215, 215, 215, 216, 216, 216, 216, 215, 216, 217, 216, 216, 217, 216, 216, 216, 216, 216, 215, 216, 215, 215, 215, 215, 215, 214, 215, 215, 215, 214, 214, 214, 214, 214, 214, 214, 214, 214, 214, 214, 214, 214, 213, 213, 213, 213, 213, 213, 213, 213, 213, 214, 213, 211, 212, 212, 213, 213, 211, 211, 210, 211, 140, 79, 75, 71, 69, 68, 71, 61, 56, 69, 62, 49, 57, 52, 69, 57, 66, 76, 41, 26, 3, 15, 49, 48, 39, 70, 69, 67, 70, 53, 44, 69, 58, 37, 52, 60, 64, 71, 64, 67, 68, 66, 64, 73, 68, 67, 59, 69, 74, 71, 46, 65, 39, 52, 37, 58, 42, 62, 56, 42, 58, 65, 64, 76, 75, 75, 77, 76, 79, 81, 79, 79, 56, 41, 40, 54, 71, 73, 77, 70, 75, 68, 62, 14, 20, 60, 80, 82, 74, 67, 41, 58, 63, 41, 77, 79, 81, 91, 94, 104, 192, 216, 216, 216, 214, 211, 210, 212, 216, 214, 214, 214, 214, 213, 213, 213, 213, 213, 213, 213, 213, 213, 213, 212, 212, 214, 213, 212, 212, 213, 213, 212, 213, 209, 210, 211, 210, 211, 210, 210, 210, 210, 210, 210, 210, 210, 210, 210, 211, 209, 209, 208, 208, 208, 209, 209, 210, 212, 211, 213, 215, 215, 215, 215, 216, 214, 214, 214, 214, 213, 214, 215, 215, 214, 214, 214, 214, 214, 215, 215, 216, 216, 216, 216, 216, 216, 216, 216, 216, 217, 216, 216, 216, 215, 215, 215, 214, 215, 215, 215, 215, 216, 216, 216, 216, 217, 216, 216, 216, 216, 216, 215, 215, 215, 215, 215, 215, 215, 215, 214, 215, 215, 215, 214, 213, 214, 214, 214, 214, 214, 214, 214, 214, 214, 214, 213, 213, 213, 213, 213, 213, 213, 213, 213, 213, 213, 212, 213, 213, 212, 213, 213, 212, 212, 211, 210, 139, 78, 73, 67, 64, 66, 64, 54, 61, 69, 57, 53, 31, 64, 68, 47, 68, 78, 46, 65, 62, 69, 73, 77, 75, 63, 56, 71, 54, 20, 48, 68, 67, 71, 67, 58, 63, 62, 63, 60, 58, 61, 62, 53, 61, 54, 34, 54, 33, 57, 39, 63, 59, 79, 75, 73, 72, 75, 68, 70, 63, 52, 55, 43, 44, 55, 63, 72, 76, 76, 82, 83, 82, 77, 68, 61, 62, 61, 67, 64, 43, 62, 72, 68, 58, 37, 59, 66, 32, 13, 37, 57, 87, 73, 75, 85, 74, 92, 96, 94, 177, 212, 215, 217, 214, 211, 211, 212, 216, 214, 214, 214, 214, 213, 213, 213, 213, 213, 213, 213, 213, 213, 213, 212, 212, 214, 213, 211, 212, 213, 213, 212, 212, 210, 210, 211, 210, 210, 210, 210, 210, 210, 210, 210, 210, 210, 211, 211, 210, 209, 209, 209, 209, 209, 209, 209, 211, 212, 212, 214, 215, 216, 215, 215, 217, 215, 215, 215, 214, 213, 214, 215, 214, 215, 214, 215, 214, 214, 215, 215, 216, 217, 216, 216, 216, 216, 216, 216, 217, 217, 217, 217, 217, 216, 216, 216, 215, 216, 216, 216, 216, 216, 216, 216, 216, 216, 216, 216, 216, 216, 216, 216, 216, 216, 216, 216, 215, 215, 215, 215, 215, 215, 215, 215, 213, 214, 214, 214, 215, 214, 214, 214, 214, 214, 213, 213, 213, 213, 213, 213, 213, 213, 213, 213, 213, 213, 212, 214, 214, 212, 212, 212, 212, 212, 211, 211, 132, 78, 73, 66, 68, 66, 61, 66, 63, 60, 72, 56, 52, 66, 61, 33, 68, 83, 75, 72, 74, 66, 37, 38, 54, 70, 73, 78, 75, 78, 75, 69, 73, 66, 63, 64, 61, 62, 64, 53, 59, 34, 39, 34, 35, 45, 43, 59, 63, 75, 76, 72, 77, 78, 74, 68, 72, 72, 73, 73, 71, 76, 73, 70, 59, 53, 43, 47, 33, 73, 73, 87, 81, 81, 78, 80, 73, 69, 72, 77, 41, 26, 64, 67, 73, 79, 77, 72, 67, 54, 54, 45, 82, 72, 68, 65, 79, 82, 95, 95, 157, 212, 217, 218, 216, 212, 211, 212, 216, 215, 214, 214, 214, 213, 213, 213, 213, 213, 213, 213, 213, 213, 213, 212, 212, 214, 213, 213, 213, 213, 213, 212, 213, 210, 209, 209, 208, 210, 210, 210, 210, 210, 210, 210, 210, 210, 212, 212, 209, 210, 210, 209, 209, 209, 209, 209, 212, 212, 213, 214, 215, 216, 215, 215, 217, 215, 215, 215, 214, 214, 214, 215, 215, 215, 215, 216, 215, 215, 216, 216, 216, 216, 216, 216, 216, 216, 216, 216, 216, 216, 217, 217, 217, 217, 217, 217, 217, 217, 217, 217, 217, 216, 216, 216, 216, 216, 217, 217, 217, 217, 217, 217, 217, 217, 215, 215, 215, 214, 214, 214, 214, 214, 214, 214, 214, 214, 214, 214, 214, 214, 214, 214, 214, 214, 213, 213, 213, 213, 213, 213, 213, 213, 213, 213, 213, 213, 212, 214, 214, 212, 212, 212, 212, 212, 211, 210, 128, 79, 71, 67, 67, 59, 70, 70, 52, 63, 61, 61, 55, 71, 44, 50, 43, 39, 80, 57, 56, 71, 73, 70, 72, 76, 75, 70, 72, 68, 69, 74, 70, 66, 65, 47, 45, 24, 52, 30, 42, 38, 53, 54, 58, 63, 69, 63, 80, 74, 78, 73, 75, 71, 69, 63, 67, 67, 66, 67, 74, 73, 75, 79, 73, 73, 70, 66, 52, 51, 39, 73, 61, 82, 83, 86, 83, 76, 80, 75, 79, 70, 69, 64, 51, 41, 46, 60, 77, 80, 76, 69, 79, 60, 65, 55, 86, 75, 91, 100, 127, 209, 214, 216, 215, 212, 211, 212, 216, 215, 215, 215, 214, 213, 214, 214, 214, 214, 214, 214, 214, 214, 214, 213, 213, 214, 213, 215, 213, 213, 213, 213, 213, 211, 211, 210, 210, 209, 209, 209, 209, 209, 210, 210, 210, 209, 210, 210, 210, 210, 210, 209, 209, 209, 209, 209, 212, 212, 214, 215, 214, 216, 215, 215, 217, 215, 215, 215, 215, 215, 215, 216, 215, 215, 215, 216, 216, 215, 216, 216, 216, 216, 216, 216, 216, 216, 216, 216, 215, 216, 217, 217, 217, 216, 216, 217, 217, 217, 217, 217, 217, 217, 217, 217, 217, 217, 217, 217, 217, 217, 217, 217, 217, 216, 214, 215, 214, 214, 214, 214, 214, 214, 214, 214, 214, 214, 214, 214, 214, 214, 214, 214, 214, 214, 213, 213, 213, 213, 213, 213, 213, 213, 213, 213, 213, 213, 212, 214, 214, 212, 212, 211, 212, 213, 210, 209, 121, 75, 70, 71, 60, 67, 77, 64, 51, 43, 50, 64, 67, 67, 47, 68, 44, 62, 68, 70, 73, 70, 70, 69, 71, 74, 70, 70, 65, 54, 57, 47, 48, 26, 54, 26, 47, 40, 58, 54, 65, 62, 60, 62, 62, 62, 64, 68, 74, 73, 75, 65, 79, 67, 67, 59, 67, 72, 68, 65, 63, 76, 75, 75, 76, 76, 75, 74, 77, 75, 71, 64, 55, 58, 39, 60, 56, 68, 72, 78, 78, 75, 73, 79, 72, 81, 76, 65, 57, 46, 57, 73, 60, 46, 67, 61, 73, 77, 84, 93, 116, 205, 212, 214, 213, 211, 212, 212, 216, 214, 214, 215, 214, 214, 214, 214, 214, 214, 214, 214, 214, 214, 214, 214, 213, 214, 213, 216, 214, 213, 213, 213, 214, 211, 210, 209, 209, 209, 209, 209, 209, 209, 210, 210, 210, 209, 208, 209, 210, 209, 209, 209, 209, 209, 209, 209, 213, 213, 213, 215, 215, 217, 216, 215, 217, 215, 216, 215, 215, 215, 215, 215, 215, 215, 216, 216, 216, 216, 216, 216, 216, 216, 216, 216, 216, 216, 216, 216, 217, 217, 217, 216, 217, 217, 216, 217, 217, 217, 217, 217, 217, 217, 217, 217, 217, 217, 217, 217, 217, 217, 217, 218, 217, 214, 214, 214, 214, 214, 214, 214, 214, 214, 214, 214, 214, 215, 215, 215, 214, 214, 213, 214, 214, 213, 213, 213, 213, 213, 213, 213, 213, 213, 213, 213, 213, 213, 213, 216, 215, 212, 212, 213, 211, 213, 209, 209, 114, 71, 71, 54, 58, 77, 72, 57, 38, 26, 58, 54, 25, 34, 60, 59, 67, 79, 69, 67, 64, 69, 69, 67, 64, 61, 42, 51, 35, 45, 38, 43, 61, 53, 64, 61, 58, 63, 66, 64, 65, 62, 63, 64, 66, 66, 66, 68, 67, 65, 66, 68, 69, 67, 66, 61, 63, 68, 68, 64, 69, 71, 72, 76, 73, 74, 72, 71, 75, 79, 78, 82, 79, 77, 68, 60, 42, 61, 46, 61, 59, 73, 72, 75, 74, 76, 75, 71, 68, 74, 74, 71, 28, 50, 67, 75, 65, 75, 80, 88, 104, 193, 211, 214, 214, 212, 211, 212, 214, 214, 214, 214, 214, 214, 215, 215, 215, 214, 214, 214, 213, 215, 214, 214, 213, 213, 213, 213, 214, 212, 212, 212, 212, 210, 210, 210, 210, 210, 210, 210, 210, 210, 210, 210, 210, 210, 209, 209, 209, 209, 209, 209, 209, 209, 209, 209, 214, 212, 212, 215, 216, 217, 218, 217, 217, 215, 216, 216, 215, 215, 215, 215, 215, 215, 216, 216, 216, 216, 216, 216, 216, 216, 216, 216, 216, 216, 216, 216, 217, 217, 217, 217, 216, 216, 216, 218, 218, 218, 217, 217, 217, 217, 217, 217, 217, 217, 217, 217, 217, 217, 217, 217, 217, 215, 215, 216, 216, 216, 216, 215, 214, 214, 214, 214, 214, 215, 215, 215, 214, 214, 213, 214, 214, 213, 213, 213, 213, 213, 213, 213, 213, 213, 213, 213, 213, 213, 213, 216, 215, 212, 212, 212, 210, 212, 211, 209, 111, 75, 64, 56, 72, 64, 70, 61, 56, 54, 54, 65, 60, 64, 52, 67, 66, 75, 68, 68, 56, 61, 36, 48, 29, 59, 42, 56, 66, 60, 71, 72, 68, 63, 64, 64, 65, 70, 71, 66, 63, 64, 60, 61, 68, 71, 68, 68, 68, 66, 67, 68, 64, 62, 63, 60, 65, 72, 71, 65, 70, 74, 69, 73, 74, 73, 75, 74, 70, 74, 76, 78, 76, 74, 78, 77, 77, 74, 67, 72, 40, 55, 43, 68, 56, 71, 72, 73, 75, 69, 67, 67, 86, 76, 75, 69, 49, 58, 75, 81, 105, 185, 211, 214, 213, 213, 212, 212, 214, 213, 213, 213, 213, 214, 214, 214, 214, 214, 214, 213, 213, 214, 214, 213, 214, 214, 213, 213, 213, 212, 212, 212, 212, 210, 210, 210, 210, 210, 210, 210, 210, 210, 210, 210, 210, 210, 207, 207, 207, 209, 209, 209, 209, 209, 209, 209, 213, 212, 212, 215, 215, 217, 216, 216, 218, 214, 215, 215, 215, 215, 215, 215, 215, 216, 216, 216, 216, 216, 216, 216, 216, 216, 216, 216, 216, 216, 216, 216, 216, 217, 217, 217, 218, 218, 218, 218, 218, 218, 217, 217, 217, 217, 217, 217, 217, 217, 217, 217, 217, 217, 217, 217, 217, 216, 216, 216, 216, 215, 215, 215, 214, 214, 214, 214, 214, 215, 215, 215, 214, 213, 213, 214, 213, 213, 213, 213, 213, 213, 213, 213, 213, 213, 213, 213, 213, 213, 213, 215, 215, 212, 212, 212, 212, 211, 211, 207, 110, 68, 61, 70, 69, 40, 61, 41, 62, 63, 56, 65, 63, 54, 69, 71, 56, 60, 42, 48, 39, 61, 42, 67, 68, 72, 68, 71, 71, 70, 69, 71, 71, 70, 66, 75, 71, 70, 65, 61, 64, 64, 61, 64, 67, 67, 66, 66, 64, 62, 67, 67, 61, 64, 65, 64, 66, 72, 72, 70, 71, 75, 70, 71, 74, 74, 72, 72, 74, 76, 74, 72, 71, 73, 69, 74, 69, 75, 75, 75, 75, 73, 65, 68, 41, 54, 41, 49, 59, 63, 68, 75, 71, 80, 67, 35, 52, 47, 75, 82, 99, 166, 211, 215, 216, 213, 213, 212, 212, 212, 212, 212, 212, 212, 213, 213, 214, 214, 214, 213, 213, 214, 214, 214, 213, 213, 213, 213, 212, 211, 211, 212, 212, 210, 209, 209, 209, 209, 209, 210, 210, 210, 210, 210, 210, 210, 207, 207, 207, 207, 209, 209, 209, 209, 210, 209, 213, 215, 214, 213, 215, 215, 216, 216, 216, 216, 216, 216, 216, 216, 217, 216, 216, 216, 217, 216, 216, 216, 216, 216, 216, 216, 217, 217, 216, 215, 216, 217, 217, 218, 218, 218, 219, 219, 219, 219, 219, 219, 219, 219, 219, 219, 217, 216, 217, 216, 217, 217, 217, 217, 217, 216, 216, 216, 216, 216, 216, 215, 215, 215, 214, 213, 213, 214, 214, 214, 214, 213, 212, 213, 213, 213, 213, 213, 213, 213, 213, 213, 213, 212, 212, 212, 213, 213, 213, 213, 213, 212, 213, 212, 212, 213, 211, 212, 211, 207, 105, 58, 78, 71, 69, 56, 29, 50, 47, 59, 56, 71, 58, 67, 70, 67, 48, 58, 53, 63, 65, 70, 73, 70, 69, 68, 71, 68, 68, 65, 65, 67, 64, 67, 65, 65, 65, 65, 64, 63, 64, 66, 64, 60, 67, 67, 69, 66, 67, 67, 64, 65, 65, 66, 66, 63, 58, 59, 75, 77, 73, 76, 69, 71, 73, 72, 74, 78, 78, 77, 75, 75, 74, 77, 77, 75, 74, 73, 73, 73, 70, 75, 77, 79, 80, 69, 59, 66, 32, 48, 43, 47, 64, 71, 74, 68, 71, 77, 67, 82, 88, 146, 211, 216, 217, 215, 214, 211, 210, 213, 212, 211, 213, 214, 214, 213, 214, 215, 214, 213, 212, 212, 213, 214, 213, 212, 213, 212, 212, 212, 212, 212, 212, 209, 209, 209, 210, 209, 209, 210, 210, 210, 210, 210, 210, 210, 209, 209, 209, 209, 209, 209, 209, 209, 209, 209, 213, 214, 214, 213, 215, 215, 216, 216, 216, 216, 216, 216, 216, 216, 216, 216, 216, 216, 217, 216, 216, 216, 216, 216, 216, 217, 217, 217, 216, 216, 216, 217, 216, 217, 218, 219, 219, 219, 219, 219, 219, 219, 219, 219, 219, 218, 217, 217, 217, 217, 217, 217, 217, 217, 217, 216, 216, 216, 216, 217, 216, 216, 215, 215, 215, 214, 213, 213, 214, 214, 214, 213, 213, 213, 213, 213, 213, 213, 213, 213, 213, 213, 213, 212, 212, 212, 213, 213, 213, 213, 213, 212, 213, 212, 213, 213, 211, 212, 209, 207, 106, 75, 76, 62, 64, 73, 53, 64, 62, 32, 61, 65, 69, 66, 63, 47, 57, 63, 66, 68, 66, 67, 67, 67, 69, 69, 71, 67, 66, 65, 63, 62, 63, 67, 67, 68, 66, 65, 67, 62, 65, 67, 66, 61, 64, 65, 69, 63, 65, 66, 64, 63, 62, 63, 65, 63, 62, 66, 70, 70, 70, 72, 75, 72, 71, 71, 71, 74, 74, 74, 75, 74, 73, 70, 72, 71, 74, 71, 72, 76, 72, 70, 73, 71, 71, 74, 77, 71, 72, 69, 57, 63, 50, 40, 72, 78, 72, 75, 56, 62, 89, 122, 210, 215, 217, 216, 214, 211, 210, 212, 210, 210, 213, 214, 214, 213, 214, 215, 213, 213, 213, 213, 212, 212, 212, 212, 212, 212, 212, 212, 212, 212, 211, 209, 209, 209, 209, 209, 210, 210, 210, 210, 210, 209, 210, 210, 209, 209, 209, 209, 209, 209, 209, 209, 209, 209, 212, 214, 214, 213, 215, 215, 216, 215, 215, 215, 215, 216, 216, 216, 215, 216, 216, 216, 216, 216, 216, 216, 217, 216, 217, 217, 217, 217, 217, 217, 218, 218, 218, 218, 218, 219, 219, 219, 219, 219, 219, 219, 219, 219, 219, 218, 218, 218, 217, 217, 217, 217, 217, 217, 217, 217, 216, 216, 216, 217, 215, 216, 215, 214, 215, 214, 214, 213, 214, 215, 215, 214, 213, 214, 214, 213, 213, 213, 213, 213, 212, 212, 213, 212, 212, 212, 212, 212, 213, 213, 213, 212, 213, 213, 214, 214, 211, 211, 210, 208, 116, 79, 67, 63, 46, 70, 61, 65, 55, 46, 48, 50, 69, 72, 58, 63, 70, 71, 69, 67, 66, 67, 68, 68, 66, 67, 67, 67, 65, 69, 67, 65, 68, 71, 70, 70, 68, 65, 64, 65, 66, 64, 61, 65, 68, 65, 68, 65, 60, 63, 64, 64, 64, 61, 61, 62, 64, 71, 74, 69, 70, 69, 73, 69, 72, 72, 74, 76, 72, 74, 76, 73, 74, 76, 80, 76, 72, 71, 74, 75, 72, 71, 73, 74, 72, 75, 77, 70, 73, 74, 73, 75, 72, 67, 68, 81, 79, 62, 61, 66, 88, 102, 201, 213, 216, 215, 213, 212, 212, 213, 212, 212, 214, 215, 214, 213, 214, 215, 213, 213, 214, 213, 213, 212, 212, 212, 212, 212, 212, 212, 212, 212, 211, 210, 209, 209, 209, 210, 210, 210, 210, 210, 209, 209, 209, 210, 208, 209, 209, 209, 209, 209, 209, 209, 209, 209, 212, 213, 214, 213, 215, 215, 216, 215, 215, 215, 215, 216, 216, 216, 215, 215, 216, 216, 216, 216, 216, 216, 217, 217, 217, 217, 217, 216, 217, 218, 218, 218, 220, 220, 219, 219, 219, 219, 219, 219, 219, 219, 219, 219, 219, 219, 220, 218, 216, 216, 217, 217, 217, 217, 217, 217, 217, 216, 216, 217, 214, 215, 215, 213, 214, 214, 214, 215, 215, 215, 215, 214, 214, 214, 214, 213, 213, 213, 213, 213, 212, 212, 213, 212, 212, 212, 212, 212, 212, 213, 213, 212, 213, 213, 214, 214, 210, 212, 211, 200, 93, 71, 67, 47, 28, 67, 64, 68, 55, 72, 64, 67, 73, 59, 69, 71, 61, 73, 65, 66, 68, 67, 69, 65, 66, 68, 67, 70, 68, 69, 67, 64, 66, 70, 69, 71, 69, 66, 63, 62, 68, 66, 68, 65, 61, 62, 59, 61, 63, 61, 62, 64, 63, 62, 62, 60, 61, 70, 73, 71, 70, 71, 71, 74, 73, 70, 74, 74, 72, 74, 73, 70, 71, 73, 77, 72, 72, 72, 72, 74, 76, 76, 75, 73, 73, 75, 77, 74, 71, 76, 76, 78, 74, 74, 70, 79, 74, 48, 72, 66, 80, 100, 192, 211, 217, 214, 213, 213, 213, 214, 212, 211, 212, 213, 214, 213, 214, 215, 214, 214, 213, 213, 213, 213, 212, 212, 213, 213, 212, 212, 212, 212, 213, 211, 210, 211, 211, 210, 210, 210, 210, 209, 209, 209, 209, 209, 208, 208, 209, 209, 209, 209, 209, 209, 209, 209, 211, 213, 213, 213, 215, 215, 216, 215, 215, 215, 215, 216, 216, 216, 215, 215, 215, 216, 216, 216, 216, 217, 217, 217, 217, 217, 217, 217, 217, 217, 218, 218, 219, 219, 219, 218, 218, 218, 218, 218, 219, 219, 219, 220, 220, 219, 218, 218, 217, 217, 217, 217, 217, 217, 217, 217, 217, 216, 216, 216, 216, 215, 214, 214, 215, 214, 215, 215, 215, 215, 214, 214, 214, 214, 213, 213, 213, 213, 213, 212, 212, 213, 213, 213, 212, 212, 212, 213, 213, 213, 213, 213, 211, 212, 214, 213, 212, 211, 211, 202, 88, 62, 59, 32, 37, 64, 34, 29, 51, 55, 75, 70, 65, 68, 74, 68, 67, 71, 69, 67, 68, 69, 69, 65, 67, 68, 67, 68, 69, 68, 66, 67, 68, 69, 66, 68, 67, 65, 62, 60, 62, 64, 68, 67, 64, 62, 60, 61, 59, 58, 61, 62, 61, 60, 59, 60, 63, 68, 74, 68, 67, 65, 68, 70, 72, 73, 76, 74, 73, 72, 72, 71, 72, 73, 76, 73, 72, 74, 73, 73, 75, 71, 74, 70, 73, 73, 75, 74, 75, 77, 76, 80, 76, 75, 75, 69, 76, 58, 71, 70, 70, 92, 181, 212, 214, 215, 213, 212, 213, 214, 213, 213, 213, 213, 214, 212, 214, 214, 213, 213, 212, 212, 212, 212, 212, 212, 213, 213, 212, 211, 212, 212, 212, 210, 210, 210, 210, 210, 210, 210, 210, 210, 210, 210, 210, 210, 209, 209, 209, 209, 209, 209, 209, 209, 209, 209, 211, 212, 212, 213, 215, 215, 216, 216, 215, 216, 216, 216, 216, 216, 216, 216, 216, 216, 217, 216, 216, 217, 217, 217, 217, 217, 216, 217, 217, 218, 218, 218, 219, 219, 219, 218, 218, 219, 219, 219, 219, 219, 220, 220, 219, 219, 218, 218, 217, 217, 217, 217, 217, 217, 217, 216, 216, 216, 216, 216, 216, 215, 214, 214, 214, 214, 215, 214, 215, 214, 214, 215, 213, 214, 214, 214, 214, 213, 212, 212, 213, 214, 213, 213, 212, 213, 213, 213, 213, 213, 213, 211, 212, 213, 213, 213, 214, 212, 209, 202, 86, 70, 59, 67, 55, 68, 51, 61, 51, 74, 72, 65, 64, 79, 73, 67, 67, 69, 61, 63, 62, 65, 67, 64, 65, 65, 64, 67, 66, 66, 66, 66, 65, 64, 64, 64, 60, 59, 55, 53, 55, 64, 66, 65, 63, 63, 59, 60, 59, 57, 58, 60, 60, 59, 58, 61, 64, 67, 73, 68, 68, 67, 66, 66, 67, 69, 73, 73, 70, 70, 72, 73, 71, 67, 73, 74, 74, 76, 75, 73, 73, 73, 75, 71, 72, 72, 72, 76, 73, 78, 79, 74, 77, 74, 80, 76, 75, 82, 75, 65, 41, 77, 156, 210, 217, 216, 213, 213, 214, 214, 213, 214, 214, 213, 213, 213, 213, 213, 212, 212, 211, 211, 212, 212, 212, 212, 212, 213, 213, 212, 212, 212, 212, 210, 210, 210, 210, 210, 210, 210, 210, 209, 209, 209, 209, 209, 209, 209, 209, 210, 210, 210, 210, 210, 210, 208, 212, 213, 213, 214, 215, 215, 216, 216, 216, 216, 216, 216, 216, 216, 216, 216, 216, 217, 217, 217, 217, 217, 217, 217, 217, 217, 216, 217, 218, 218, 218, 218, 218, 219, 218, 218, 218, 218, 219, 220, 220, 219, 219, 219, 218, 218, 218, 218, 217, 217, 217, 217, 217, 217, 217, 216, 216, 216, 216, 216, 216, 215, 215, 214, 214, 214, 214, 213, 215, 213, 214, 215, 213, 214, 214, 215, 214, 214, 213, 213, 213, 213, 213, 213, 213, 213, 213, 213, 213, 213, 213, 212, 213, 211, 213, 215, 214, 212, 212, 206, 100, 28, 62, 67, 42, 66, 60, 52, 56, 71, 70, 59, 79, 74, 72, 69, 67, 67, 61, 61, 61, 70, 68, 64, 62, 62, 63, 65, 61, 61, 64, 62, 64, 64, 64, 62, 56, 55, 58, 60, 64, 61, 67, 67, 64, 65, 62, 60, 58, 57, 59, 60, 60, 62, 63, 62, 60, 64, 70, 67, 68, 67, 67, 67, 68, 71, 75, 79, 73, 73, 71, 72, 72, 76, 75, 74, 75, 76, 77, 78, 76, 76, 71, 74, 73, 73, 74, 73, 71, 74, 77, 78, 75, 75, 75, 76, 69, 80, 71, 44, 42, 67, 142, 213, 215, 216, 214, 214, 214, 213, 213, 213, 214, 212, 213, 213, 212, 212, 213, 213, 212, 212, 213, 213, 212, 212, 212, 212, 211, 211, 211, 212, 213, 211, 211, 212, 211, 210, 210, 210, 210, 210, 210, 210, 210, 210, 209, 209, 209, 210, 210, 210, 210, 210, 210, 209, 216, 216, 216, 216, 215, 215, 216, 216, 216, 217, 217, 216, 216, 216, 216, 216, 216, 216, 217, 217, 217, 217, 217, 217, 216, 216, 215, 218, 218, 217, 218, 219, 218, 218, 218, 218, 218, 218, 219, 219, 219, 219, 219, 218, 217, 217, 218, 217, 217, 217, 217, 217, 217, 217, 217, 216, 216, 216, 216, 215, 215, 215, 214, 214, 214, 214, 214, 214, 214, 214, 214, 214, 214, 214, 214, 214, 214, 213, 213, 213, 213, 213, 213, 213, 214, 213, 212, 213, 213, 213, 213, 212, 212, 212, 214, 214, 210, 211, 211, 197, 72, 61, 70, 58, 39, 67, 63, 58, 67, 68, 60, 73, 72, 65, 71, 68, 69, 68, 64, 59, 64, 70, 64, 63, 59, 64, 61, 60, 64, 64, 65, 62, 63, 61, 63, 62, 63, 62, 58, 59, 62, 62, 68, 68, 69, 68, 69, 66, 66, 63, 60, 59, 60, 64, 63, 65, 64, 67, 72, 72, 70, 67, 65, 64, 70, 70, 74, 76, 74, 74, 70, 65, 69, 72, 69, 73, 72, 71, 76, 73, 79, 72, 72, 77, 77, 77, 75, 76, 73, 74, 78, 75, 70, 76, 75, 78, 77, 70, 80, 68, 81, 75, 143, 210, 212, 216, 216, 214, 211, 212, 213, 211, 213, 212, 212, 213, 213, 212, 212, 212, 212, 212, 212, 212, 212, 212, 212, 212, 212, 213, 213, 214, 214, 212, 211, 211, 211, 211, 210, 210, 209, 209, 210, 210, 210, 209, 209, 208, 208, 209, 209, 209, 209, 210, 210, 210, 216, 216, 216, 216, 215, 215, 216, 216, 216, 216, 216, 215, 216, 217, 217, 217, 217, 217, 217, 217, 217, 217, 217, 217, 217, 217, 217, 217, 217, 218, 218, 218, 218, 218, 219, 219, 218, 219, 219, 219, 219, 217, 218, 219, 219, 218, 217, 217, 217, 217, 216, 216, 216, 216, 216, 217, 216, 216, 216, 215, 215, 215, 214, 214, 214, 214, 214, 214, 214, 214, 214, 214, 214, 214, 213, 213, 214, 213, 213, 213, 213, 213, 213, 213, 214, 213, 213, 213, 213, 213, 213, 212, 213, 212, 214, 214, 211, 212, 210, 195, 74, 72, 75, 44, 45, 55, 71, 66, 66, 55, 71, 78, 66, 65, 74, 72, 55, 46, 63, 63, 65, 68, 68, 67, 65, 63, 60, 60, 59, 61, 64, 60, 60, 63, 63, 60, 61, 63, 62, 59, 60, 64, 67, 67, 63, 68, 68, 65, 65, 64, 61, 60, 69, 69, 72, 66, 66, 72, 77, 73, 68, 70, 74, 73, 80, 77, 76, 77, 74, 73, 74, 75, 73, 70, 70, 70, 70, 72, 74, 75, 79, 69, 69, 70, 69, 73, 76, 77, 76, 75, 76, 76, 73, 71, 75, 78, 81, 76, 76, 74, 72, 81, 99, 214, 213, 216, 215, 214, 213, 212, 213, 211, 213, 212, 212, 213, 213, 212, 212, 212, 212, 212, 212, 212, 212, 212, 212, 212, 213, 213, 213, 212, 213, 211, 212, 212, 212, 212, 212, 211, 211, 212, 210, 208, 209, 209, 209, 209, 210, 209, 209, 209, 209, 210, 210, 209, 216, 216, 216, 216, 216, 216, 217, 216, 216, 218, 217, 216, 216, 217, 217, 217, 217, 217, 217, 217, 217, 217, 217, 217, 217, 217, 217, 218, 217, 216, 216, 217, 218, 218, 219, 219, 219, 219, 219, 219, 219, 218, 219, 219, 219, 218, 218, 218, 218, 218, 218, 218, 218, 218, 218, 217, 217, 216, 216, 215, 215, 215, 214, 214, 214, 214, 214, 214, 214, 214, 214, 214, 214, 214, 213, 213, 213, 213, 213, 213, 213, 213, 213, 213, 214, 213, 213, 214, 213, 213, 213, 212, 213, 213, 214, 215, 212, 213, 210, 191, 70, 79, 65, 46, 54, 38, 74, 62, 48, 65, 70, 70, 70, 69, 75, 72, 64, 64, 68, 66, 68, 68, 65, 67, 66, 60, 57, 58, 59, 62, 64, 63, 66, 66, 63, 65, 64, 62, 62, 64, 63, 64, 66, 69, 70, 72, 68, 66, 67, 70, 65, 67, 74, 70, 64, 65, 65, 68, 73, 69, 65, 67, 75, 81, 66, 65, 70, 71, 78, 73, 68, 70, 69, 67, 71, 75, 78, 74, 72, 75, 76, 71, 71, 71, 72, 72, 74, 73, 72, 72, 76, 76, 74, 75, 75, 74, 82, 82, 75, 77, 71, 69, 77, 202, 210, 215, 215, 214, 213, 213, 213, 211, 213, 212, 212, 213, 213, 212, 212, 212, 212, 212, 212, 212, 212, 212, 212, 212, 213, 213, 213, 213, 213, 211, 212, 212, 212, 212, 212, 212, 212, 212, 210, 208, 210, 210, 209, 208, 208, 209, 209, 209, 209, 209, 209, 209, 216, 216, 216, 216, 216, 216, 217, 216, 216, 216, 216, 216, 216, 217, 216, 216, 216, 216, 217, 217, 217, 217, 217, 217, 217, 218, 219, 218, 219, 219, 219, 218, 218, 219, 219, 219, 219, 219, 218, 218, 219, 218, 218, 219, 219, 219, 219, 219, 219, 219, 217, 217, 217, 217, 217, 217, 217, 216, 215, 215, 215, 215, 214, 214, 214, 214, 214, 214, 214, 214, 214, 214, 214, 214, 213, 213, 213, 213, 213, 213, 213, 213, 213, 213, 214, 213, 213, 214, 213, 213, 213, 213, 213, 213, 214, 214, 212, 213, 210, 190, 58, 51, 59, 59, 63, 62, 66, 53, 65, 72, 70, 69, 71, 65, 70, 68, 65, 63, 66, 67, 68, 68, 63, 67, 68, 63, 63, 61, 58, 61, 63, 64, 64, 65, 65, 67, 63, 62, 64, 64, 66, 66, 67, 66, 70, 67, 70, 70, 69, 69, 65, 69, 65, 64, 68, 65, 64, 65, 71, 71, 71, 72, 72, 74, 72, 72, 74, 76, 75, 73, 72, 71, 68, 73, 75, 75, 74, 70, 73, 79, 76, 73, 72, 71, 71, 71, 73, 69, 65, 64, 70, 73, 68, 74, 71, 70, 76, 81, 75, 82, 66, 55, 81, 176, 212, 214, 215, 215, 213, 213, 213, 212, 213, 212, 213, 212, 212, 212, 212, 212, 212, 212, 212, 212, 212, 212, 212, 212, 212, 213, 213, 213, 212, 210, 211, 211, 212, 211, 212, 212, 212, 212, 211, 209, 209, 209, 208, 209, 210, 209, 209, 209, 209, 209, 209, 209, 216, 216, 216, 216, 216, 216, 217, 217, 217, 217, 217, 217, 217, 217, 217, 217, 217, 217, 217, 217, 217, 217, 218, 218, 218, 217, 218, 219, 219, 220, 219, 219, 220, 220, 220, 220, 219, 218, 218, 219, 219, 219, 219, 219, 219, 218, 218, 218, 218, 218, 217, 217, 217, 217, 217, 217, 216, 216, 215, 215, 215, 214, 214, 215, 215, 214, 213, 213, 213, 213, 213, 213, 213, 213, 213, 213, 214, 214, 214, 213, 213, 213, 213, 213, 213, 213, 213, 213, 213, 213, 213, 212, 213, 212, 213, 213, 213, 210, 209, 186, 63, 43, 61, 60, 64, 69, 61, 57, 73, 72, 72, 71, 70, 67, 70, 69, 65, 63, 65, 67, 66, 65, 67, 63, 63, 64, 63, 62, 60, 61, 61, 61, 59, 62, 64, 68, 69, 69, 71, 70, 70, 70, 68, 67, 66, 68, 69, 66, 70, 72, 72, 71, 66, 64, 69, 67, 62, 61, 67, 69, 68, 71, 71, 71, 72, 67, 65, 72, 73, 74, 78, 75, 72, 76, 77, 74, 75, 68, 72, 76, 72, 70, 72, 68, 64, 65, 68, 69, 69, 69, 71, 69, 67, 71, 68, 72, 79, 81, 79, 71, 76, 61, 79, 150, 209, 212, 215, 215, 213, 214, 213, 213, 213, 212, 213, 213, 213, 213, 213, 213, 213, 212, 211, 212, 212, 213, 213, 213, 212, 213, 214, 212, 213, 211, 212, 212, 212, 212, 212, 212, 212, 212, 210, 211, 208, 209, 209, 209, 209, 209, 209, 209, 209, 209, 209, 209, 216, 216, 216, 216, 216, 216, 217, 217, 217, 217, 217, 217, 217, 217, 217, 217, 217, 217, 216, 216, 216, 216, 216, 218, 219, 218, 218, 219, 219, 219, 219, 219, 219, 220, 220, 219, 219, 218, 218, 219, 219, 219, 219, 219, 219, 219, 219, 219, 219, 219, 219, 218, 218, 218, 217, 217, 216, 216, 216, 215, 215, 214, 213, 215, 215, 214, 214, 213, 213, 213, 213, 213, 213, 213, 213, 213, 214, 214, 214, 214, 214, 213, 213, 213, 213, 213, 213, 213, 213, 213, 213, 212, 214, 214, 214, 214, 213, 212, 211, 184, 64, 69, 61, 67, 70, 66, 58, 56, 65, 73, 75, 71, 67, 67, 72, 68, 64, 62, 64, 63, 64, 65, 62, 65, 66, 64, 65, 61, 60, 62, 60, 61, 65, 68, 66, 69, 68, 67, 66, 68, 66, 66, 65, 65, 62, 70, 67, 67, 67, 65, 66, 65, 67, 66, 69, 66, 64, 62, 65, 69, 69, 67, 68, 71, 71, 72, 71, 71, 71, 70, 72, 71, 71, 72, 73, 74, 79, 81, 79, 78, 74, 71, 67, 70, 72, 72, 71, 70, 73, 73, 71, 69, 71, 72, 67, 69, 79, 82, 83, 75, 71, 74, 67, 115, 210, 209, 214, 215, 214, 214, 213, 213, 213, 212, 212, 213, 214, 213, 213, 213, 212, 211, 212, 213, 213, 213, 213, 214, 213, 214, 214, 213, 213, 211, 211, 211, 212, 212, 212, 212, 212, 213, 210, 208, 209, 210, 209, 209, 209, 209, 209, 209, 209, 209, 209, 209, 216, 216, 216, 216, 215, 215, 216, 216, 216, 217, 217, 217, 217, 217, 216, 216, 216, 216, 217, 217, 217, 217, 217, 218, 220, 219, 219, 219, 219, 219, 219, 220, 219, 219, 219, 219, 219, 218, 218, 219, 219, 219, 219, 219, 219, 219, 219, 219, 219, 219, 220, 219, 218, 218, 218, 217, 216, 217, 215, 215, 216, 215, 214, 216, 215, 214, 213, 213, 213, 213, 213, 213, 213, 213, 213, 213, 214, 214, 214, 214, 214, 214, 213, 213, 213, 213, 213, 213, 213, 213, 213, 212, 213, 213, 214, 214, 212, 212, 209, 182, 66, 55, 68, 70, 58, 61, 68, 58, 71, 74, 73, 72, 68, 66, 70, 66, 64, 64, 62, 64, 65, 64, 62, 65, 70, 67, 69, 66, 67, 71, 67, 66, 67, 68, 63, 66, 66, 66, 66, 68, 70, 69, 67, 65, 65, 68, 65, 66, 68, 68, 69, 65, 71, 68, 65, 61, 63, 62, 66, 69, 66, 59, 64, 72, 73, 71, 68, 69, 74, 74, 75, 72, 72, 73, 74, 74, 76, 78, 74, 78, 73, 71, 72, 72, 70, 70, 72, 72, 73, 70, 62, 64, 70, 71, 71, 74, 82, 84, 84, 82, 68, 80, 70, 95, 210, 210, 215, 215, 213, 214, 213, 213, 213, 212, 212, 212, 211, 212, 212, 211, 211, 212, 213, 214, 213, 213, 213, 214, 214, 214, 214, 213, 213, 211, 211, 211, 211, 211, 211, 211, 211, 211, 211, 210, 210, 208, 209, 209, 209, 209, 209, 209, 209, 209, 209, 209, 214, 214, 214, 216, 216, 217, 216, 216, 217, 217, 216, 216, 216, 216, 216, 216, 216, 216, 218, 219, 218, 218, 217, 219, 219, 219, 219, 219, 219, 220, 219, 219, 219, 219, 219, 219, 219, 219, 219, 219, 219, 219, 219, 219, 219, 219, 219, 219, 219, 219, 218, 219, 219, 218, 217, 216, 216, 217, 217, 216, 216, 215, 215, 214, 214, 214, 213, 213, 213, 213, 213, 213, 213, 213, 213, 213, 213, 213, 213, 214, 215, 214, 213, 213, 213, 213, 213, 213, 213, 212, 212, 214, 212, 212, 212, 212, 213, 214, 210, 176, 69, 73, 72, 62, 60, 74, 71, 61, 71, 75, 72, 70, 66, 66, 69, 65, 64, 66, 63, 64, 67, 68, 68, 69, 73, 73, 70, 69, 72, 70, 72, 73, 69, 67, 66, 63, 61, 66, 66, 69, 68, 67, 67, 65, 71, 70, 67, 66, 66, 69, 74, 67, 65, 65, 69, 65, 68, 71, 69, 69, 67, 68, 68, 73, 75, 71, 66, 67, 70, 71, 71, 73, 72, 73, 74, 74, 78, 76, 73, 72, 75, 77, 75, 73, 73, 77, 72, 72, 68, 70, 68, 68, 65, 65, 67, 78, 84, 82, 83, 83, 79, 78, 80, 91, 201, 215, 217, 215, 212, 212, 213, 213, 213, 212, 212, 212, 213, 213, 213, 213, 212, 213, 211, 212, 211, 211, 210, 210, 212, 212, 211, 211, 211, 211, 211, 210, 209, 210, 210, 211, 211, 211, 211, 210, 210, 209, 211, 210, 210, 209, 209, 209, 209, 209, 209, 209, 214, 214, 214, 216, 216, 216, 216, 216, 216, 217, 216, 216, 216, 216, 216, 216, 216, 216, 218, 218, 218, 218, 218, 219, 219, 219, 219, 219, 219, 220, 219, 219, 219, 219, 219, 219, 219, 219, 219, 219, 219, 219, 219, 219, 219, 219, 219, 219, 219, 219, 219, 219, 219, 218, 217, 216, 216, 217, 216, 216, 215, 214, 213, 213, 214, 214, 213, 213, 213, 213, 213, 213, 213, 213, 213, 213, 213, 213, 213, 214, 214, 214, 213, 213, 213, 213, 213, 214, 213, 213, 213, 215, 213, 212, 212, 215, 211, 214, 209, 187, 73, 69, 63, 56, 69, 73, 67, 60, 70, 74, 67, 67, 67, 68, 70, 64, 68, 77, 75, 74, 73, 73, 74, 73, 73, 74, 70, 70, 71, 69, 72, 73, 72, 67, 66, 61, 64, 67, 66, 66, 66, 65, 64, 66, 70, 69, 67, 66, 65, 66, 65, 63, 64, 64, 68, 67, 62, 70, 74, 75, 77, 74, 72, 65, 66, 61, 66, 69, 68, 68, 69, 68, 66, 70, 74, 77, 78, 77, 73, 72, 69, 72, 72, 73, 73, 78, 78, 74, 71, 73, 75, 71, 72, 70, 69, 74, 78, 82, 80, 85, 88, 74, 81, 91, 196, 215, 217, 214, 211, 212, 213, 213, 213, 212, 212, 212, 212, 214, 214, 213, 213, 213, 211, 212, 211, 211, 211, 211, 212, 212, 211, 211, 211, 210, 210, 210, 210, 210, 211, 211, 211, 211, 210, 210, 209, 209, 208, 208, 208, 209, 209, 208, 208, 208, 207, 208, 214, 214, 214, 215, 215, 215, 215, 215, 216, 216, 216, 216, 216, 217, 216, 216, 216, 216, 217, 218, 218, 219, 219, 219, 219, 219, 219, 219, 219, 220, 219, 219, 219, 219, 219, 219, 219, 219, 219, 219, 219, 219, 219, 219, 219, 219, 219, 219, 219, 219, 217, 216, 216, 216, 216, 216, 216, 216, 215, 215, 215, 214, 214, 213, 214, 214, 213, 213, 213, 213, 213, 213, 213, 213, 213, 213, 213, 214, 214, 214, 214, 214, 213, 213, 213, 213, 213, 213, 213, 213, 213, 215, 213, 212, 212, 214, 214, 215, 209, 183, 75, 70, 57, 67, 75, 68, 68, 60, 74, 69, 61, 64, 70, 71, 66, 66, 70, 74, 74, 73, 72, 73, 76, 74, 73, 74, 73, 73, 71, 72, 72, 73, 68, 69, 64, 65, 66, 69, 62, 59, 62, 63, 62, 59, 55, 58, 63, 64, 65, 64, 62, 65, 66, 65, 68, 69, 67, 70, 73, 76, 76, 74, 74, 72, 74, 75, 68, 66, 69, 69, 70, 71, 70, 68, 71, 74, 76, 77, 75, 75, 70, 72, 74, 69, 71, 76, 76, 72, 73, 75, 75, 75, 77, 78, 77, 73, 76, 82, 83, 85, 84, 78, 69, 88, 178, 213, 216, 216, 213, 212, 213, 213, 212, 212, 212, 212, 212, 213, 213, 213, 213, 213, 211, 212, 211, 211, 211, 211, 211, 212, 211, 211, 211, 210, 210, 210, 211, 211, 211, 211, 211, 209, 209, 209, 209, 209, 208, 208, 208, 208, 208, 208, 208, 208, 208, 208, 214, 215, 214, 215, 215, 215, 215, 215, 216, 215, 216, 216, 216, 216, 215, 215, 215, 216, 217, 217, 217, 218, 219, 219, 219, 219, 219, 219, 219, 219, 219, 219, 219, 219, 219, 219, 219, 219, 219, 219, 219, 219, 219, 219, 219, 219, 218, 217, 218, 219, 219, 218, 217, 217, 218, 218, 216, 215, 215, 216, 216, 215, 215, 214, 214, 214, 213, 213, 213, 213, 213, 213, 213, 214, 214, 214, 214, 214, 214, 214, 214, 214, 214, 214, 214, 214, 213, 213, 213, 213, 213, 215, 213, 213, 212, 214, 214, 213, 210, 161, 66, 57, 65, 74, 69, 64, 67, 60, 71, 62, 62, 63, 67, 69, 68, 73, 72, 71, 74, 74, 74, 77, 75, 76, 76, 73, 73, 70, 69, 72, 73, 71, 71, 71, 67, 63, 68, 70, 63, 62, 65, 64, 62, 62, 59, 58, 63, 64, 63, 63, 65, 66, 65, 63, 64, 66, 69, 70, 72, 79, 77, 75, 72, 70, 73, 72, 70, 72, 72, 73, 78, 73, 68, 68, 70, 73, 78, 83, 77, 74, 74, 75, 77, 71, 74, 75, 74, 71, 70, 73, 75, 74, 80, 75, 77, 79, 82, 82, 81, 85, 81, 86, 78, 80, 170, 212, 217, 215, 217, 212, 213, 213, 213, 211, 213, 213, 213, 213, 212, 213, 212, 212, 213, 212, 212, 212, 211, 211, 211, 211, 211, 211, 211, 210, 210, 211, 211, 211, 211, 211, 211, 210, 209, 209, 209, 209, 209, 209, 209, 209, 208, 208, 209, 209, 210, 209, 213, 214, 215, 216, 215, 215, 215, 215, 216, 216, 216, 217, 217, 217, 217, 217, 216, 217, 218, 218, 218, 218, 219, 219, 219, 219, 219, 219, 219, 219, 219, 219, 219, 219, 219, 219, 219, 219, 219, 219, 219, 218, 218, 219, 219, 218, 218, 218, 218, 218, 219, 218, 218, 217, 218, 218, 217, 216, 216, 216, 215, 215, 215, 215, 214, 214, 213, 213, 213, 213, 213, 213, 213, 214, 214, 214, 214, 214, 214, 214, 214, 214, 212, 212, 212, 212, 213, 213, 213, 213, 213, 215, 213, 213, 212, 213, 213, 214, 212, 158, 58, 61, 73, 70, 68, 64, 66, 59, 68, 67, 67, 67, 68, 64, 75, 75, 69, 73, 75, 76, 72, 73, 73, 75, 72, 70, 68, 64, 67, 63, 72, 73, 74, 68, 61, 56, 58, 60, 61, 61, 60, 59, 59, 58, 59, 60, 60, 62, 62, 63, 67, 66, 64, 63, 64, 67, 67, 68, 70, 78, 81, 78, 73, 68, 72, 72, 73, 69, 66, 67, 68, 69, 70, 73, 75, 70, 70, 76, 77, 77, 74, 76, 75, 74, 72, 72, 77, 75, 74, 74, 73, 75, 77, 75, 72, 75, 83, 82, 77, 82, 80, 89, 84, 73, 127, 208, 214, 216, 214, 212, 213, 213, 212, 212, 211, 211, 211, 211, 210, 211, 211, 212, 212, 212, 212, 212, 212, 211, 211, 211, 211, 211, 211, 210, 210, 210, 211, 211, 211, 211, 211, 210, 209, 209, 209, 209, 209, 209, 209, 209, 208, 209, 209, 209, 209, 209, 213, 214, 214, 216, 216, 216, 216, 216, 217, 217, 217, 217, 217, 217, 218, 218, 217, 218, 219, 219, 219, 219, 218, 218, 219, 219, 219, 219, 219, 219, 219, 219, 219, 219, 219, 219, 219, 219, 219, 219, 218, 217, 217, 218, 218, 218, 218, 218, 218, 218, 217, 217, 217, 217, 217, 217, 216, 216, 216, 215, 215, 215, 215, 215, 214, 214, 214, 214, 214, 214, 214, 214, 214, 214, 214, 214, 214, 214, 214, 214, 214, 214, 214, 214, 214, 214, 214, 214, 213, 213, 213, 215, 213, 213, 212, 214, 213, 214, 212, 164, 65, 75, 71, 66, 69, 68, 64, 61, 66, 63, 69, 67, 66, 68, 75, 75, 70, 74, 72, 74, 73, 74, 74, 68, 67, 70, 69, 68, 70, 60, 65, 64, 64, 62, 63, 60, 62, 62, 67, 63, 61, 61, 58, 57, 58, 61, 66, 64, 63, 64, 67, 65, 64, 64, 63, 65, 67, 66, 65, 77, 74, 74, 73, 67, 72, 73, 77, 78, 76, 75, 74, 73, 73, 66, 69, 73, 72, 72, 75, 74, 72, 70, 73, 74, 74, 72, 75, 76, 75, 74, 72, 72, 76, 78, 71, 71, 80, 85, 81, 83, 81, 88, 89, 81, 94, 206, 211, 214, 210, 212, 212, 212, 212, 212, 214, 214, 214, 214, 212, 211, 211, 212, 212, 211, 211, 211, 211, 211, 211, 211, 211, 211, 212, 210, 210, 210, 211, 211, 211, 211, 211, 211, 209, 208, 209, 209, 209, 209, 209, 209, 209, 209, 209, 209, 209, 209, 215, 214, 213, 216, 216, 216, 216, 216, 217, 216, 216, 217, 217, 217, 218, 217, 217, 218, 219, 220, 220, 219, 218, 218, 219, 219, 219, 219, 219, 219, 219, 219, 219, 219, 219, 219, 220, 219, 219, 218, 218, 217, 217, 217, 217, 217, 218, 219, 218, 218, 217, 218, 218, 217, 217, 216, 215, 215, 215, 215, 215, 215, 215, 215, 214, 214, 214, 214, 214, 214, 214, 214, 214, 214, 214, 214, 214, 214, 214, 214, 214, 214, 214, 214, 214, 214, 214, 214, 214, 213, 213, 215, 213, 213, 212, 214, 214, 215, 209, 168, 73, 64, 67, 67, 63, 69, 61, 61, 67, 68, 68, 66, 71, 76, 76, 73, 72, 74, 72, 72, 72, 74, 67, 61, 63, 64, 62, 63, 62, 61, 62, 61, 60, 59, 61, 58, 58, 56, 63, 60, 60, 59, 59, 59, 58, 59, 66, 63, 63, 63, 64, 63, 63, 65, 63, 58, 58, 65, 67, 76, 77, 75, 69, 63, 71, 73, 74, 76, 75, 73, 74, 75, 76, 70, 75, 75, 71, 69, 70, 69, 74, 73, 68, 71, 66, 66, 74, 75, 74, 74, 73, 73, 76, 73, 75, 74, 77, 88, 82, 80, 83, 86, 90, 89, 81, 198, 210, 213, 209, 212, 212, 211, 212, 213, 213, 213, 213, 213, 212, 211, 211, 211, 212, 211, 211, 211, 211, 211, 211, 211, 211, 211, 212, 211, 210, 210, 210, 210, 210, 210, 210, 211, 210, 208, 208, 209, 209, 209, 209, 209, 209, 209, 209, 209, 209, 209, 215, 216, 215, 215, 215, 216, 217, 217, 217, 215, 215, 216, 216, 216, 216, 218, 217, 218, 219, 218, 219, 220, 218, 219, 219, 220, 220, 220, 219, 219, 219, 219, 218, 218, 219, 219, 219, 219, 219, 218, 218, 217, 217, 217, 217, 217, 218, 219, 219, 219, 218, 218, 217, 217, 217, 216, 216, 216, 215, 214, 215, 215, 215, 216, 215, 214, 214, 214, 214, 214, 214, 214, 214, 214, 214, 213, 215, 214, 214, 214, 214, 214, 214, 214, 214, 214, 214, 214, 213, 213, 213, 216, 215, 213, 213, 214, 216, 214, 212, 150, 72, 61, 68, 71, 65, 70, 63, 61, 66, 69, 71, 69, 76, 77, 74, 72, 71, 69, 68, 68, 66, 70, 67, 65, 61, 60, 62, 64, 61, 57, 59, 59, 60, 60, 61, 60, 57, 57, 64, 61, 62, 61, 61, 60, 59, 59, 61, 64, 66, 62, 62, 65, 64, 62, 62, 62, 59, 64, 67, 74, 78, 74, 74, 72, 73, 71, 74, 75, 77, 68, 66, 70, 67, 69, 74, 76, 74, 79, 76, 73, 69, 69, 68, 74, 69, 73, 71, 73, 74, 76, 75, 75, 74, 70, 74, 73, 78, 85, 86, 85, 94, 85, 84, 88, 84, 192, 215, 217, 209, 211, 211, 211, 211, 211, 211, 211, 211, 211, 209, 210, 211, 210, 210, 210, 210, 211, 211, 211, 211, 211, 211, 211, 212, 210, 210, 209, 209, 209, 209, 209, 209, 208, 209, 208, 208, 209, 209, 209, 209, 209, 209, 209, 209, 209, 209, 209, 214, 214, 215, 217, 216, 216, 216, 217, 216, 215, 216, 216, 216, 216, 214, 218, 218, 218, 219, 219, 219, 218, 217, 218, 219, 219, 219, 220, 219, 219, 219, 219, 219, 219, 219, 219, 219, 219, 219, 218, 218, 218, 218, 218, 218, 218, 218, 219, 219, 218, 218, 218, 217, 217, 217, 217, 217, 216, 215, 214, 215, 216, 215, 214, 215, 216, 215, 214, 215, 214, 214, 214, 214, 214, 213, 213, 215, 213, 213, 213, 213, 213, 214, 214, 214, 214, 214, 214, 214, 213, 213, 216, 215, 212, 213, 214, 215, 212, 214, 143, 73, 67, 69, 65, 62, 65, 62, 60, 67, 70, 68, 71, 73, 78, 74, 70, 68, 70, 69, 71, 66, 66, 68, 67, 58, 53, 58, 58, 50, 47, 54, 57, 56, 56, 55, 53, 53, 57, 62, 60, 60, 59, 60, 61, 60, 59, 61, 67, 62, 56, 65, 72, 71, 68, 63, 64, 62, 63, 64, 72, 73, 60, 63, 65, 71, 72, 74, 73, 71, 73, 69, 63, 66, 66, 65, 71, 68, 75, 79, 77, 73, 71, 65, 65, 65, 70, 70, 72, 71, 71, 72, 72, 70, 70, 77, 76, 78, 86, 85, 85, 97, 84, 77, 86, 87, 172, 215, 212, 210, 209, 209, 209, 209, 209, 210, 209, 209, 210, 209, 209, 210, 211, 211, 212, 212, 211, 211, 211, 211, 211, 211, 211, 211, 210, 211, 211, 211, 211, 211, 210, 209, 208, 209, 208, 208, 209, 209, 209, 209, 209, 209, 209, 209, 209, 209, 209, 215, 215, 216, 217, 217, 217, 217, 217, 217, 217, 217, 217, 217, 217, 216, 218, 218, 218, 219, 220, 219, 217, 217, 217, 218, 218, 218, 220, 219, 219, 219, 219, 220, 220, 220, 220, 219, 219, 219, 218, 218, 218, 218, 218, 219, 218, 218, 219, 219, 218, 218, 218, 217, 217, 216, 217, 217, 216, 216, 216, 216, 215, 215, 215, 215, 216, 217, 216, 216, 215, 215, 215, 214, 213, 213, 213, 215, 214, 214, 214, 214, 214, 214, 214, 214, 214, 214, 214, 214, 214, 213, 217, 215, 211, 213, 215, 217, 211, 215, 137, 72, 69, 66, 69, 67, 70, 64, 63, 69, 68, 70, 69, 73, 73, 71, 71, 69, 71, 72, 69, 66, 67, 67, 65, 59, 56, 61, 58, 53, 52, 54, 53, 52, 53, 56, 57, 57, 58, 61, 61, 59, 57, 59, 64, 66, 65, 68, 70, 68, 71, 75, 74, 70, 68, 60, 63, 63, 62, 63, 73, 75, 65, 62, 68, 72, 72, 74, 74, 68, 68, 69, 73, 73, 72, 72, 75, 77, 74, 75, 74, 70, 69, 69, 67, 65, 68, 67, 63, 68, 71, 68, 66, 66, 66, 68, 73, 72, 82, 86, 81, 89, 86, 79, 87, 94, 150, 211, 213, 212, 210, 210, 210, 210, 210, 210, 209, 209, 211, 211, 210, 210, 211, 210, 211, 211, 211, 211, 211, 211, 211, 211, 211, 211, 210, 210, 210, 210, 210, 210, 210, 209, 208, 209, 208, 208, 209, 208, 208, 208, 208, 209, 209, 209, 209, 209, 209, 215, 215, 215, 215, 216, 217, 216, 216, 216, 217, 217, 217, 217, 217, 216, 216, 216, 218, 218, 218, 217, 217, 217, 217, 217, 219, 220, 219, 219, 219, 219, 220, 219, 220, 220, 220, 220, 219, 218, 218, 218, 218, 218, 218, 218, 218, 217, 216, 217, 217, 217, 218, 218, 216, 216, 216, 216, 216, 216, 214, 215, 216, 216, 216, 216, 216, 216, 216, 216, 216, 216, 216, 216, 215, 215, 215, 215, 215, 215, 214, 213, 213, 214, 214, 214, 214, 214, 214, 214, 214, 214, 217, 216, 213, 213, 215, 216, 210, 216, 134, 71, 70, 66, 66, 67, 69, 64, 62, 65, 68, 72, 67, 71, 71, 67, 68, 68, 70, 72, 69, 65, 63, 65, 64, 61, 59, 62, 62, 59, 59, 59, 63, 63, 59, 57, 59, 57, 55, 57, 63, 63, 66, 65, 69, 70, 71, 74, 73, 76, 73, 72, 71, 66, 66, 65, 63, 61, 63, 59, 72, 73, 65, 63, 65, 71, 67, 72, 75, 70, 69, 68, 71, 72, 71, 70, 68, 71, 70, 68, 70, 70, 74, 70, 68, 69, 68, 67, 69, 67, 70, 67, 70, 69, 62, 67, 70, 73, 77, 83, 81, 79, 87, 80, 80, 91, 131, 206, 211, 209, 210, 210, 210, 210, 209, 210, 210, 210, 210, 210, 210, 210, 211, 211, 210, 210, 210, 210, 210, 211, 211, 211, 211, 211, 210, 209, 209, 209, 209, 210, 211, 211, 209, 209, 209, 209, 209, 209, 209, 209, 208, 208, 208, 208, 208, 208, 208, 213, 214, 215, 215, 215, 216, 217, 217, 218, 218, 217, 217, 217, 218, 216, 216, 216, 217, 217, 217, 217, 217, 217, 217, 216, 218, 219, 219, 219, 219, 219, 219, 219, 219, 219, 218, 218, 218, 218, 218, 218, 218, 218, 218, 218, 218, 217, 216, 217, 217, 217, 217, 217, 216, 216, 216, 217, 217, 217, 216, 217, 217, 216, 216, 216, 216, 216, 216, 216, 216, 216, 216, 216, 215, 215, 215, 214, 215, 215, 214, 213, 213, 214, 214, 214, 214, 214, 214, 214, 214, 214, 217, 216, 213, 213, 216, 216, 212, 214, 136, 70, 62, 64, 66, 64, 65, 49, 52, 67, 66, 67, 66, 68, 65, 62, 69, 65, 67, 73, 71, 67, 66, 65, 65, 64, 62, 61, 62, 61, 64, 66, 64, 66, 71, 71, 70, 68, 67, 68, 82, 77, 68, 60, 70, 66, 70, 72, 72, 74, 74, 74, 72, 69, 66, 59, 63, 64, 63, 62, 70, 70, 64, 64, 69, 73, 68, 71, 74, 70, 70, 70, 70, 72, 71, 66, 67, 72, 71, 65, 66, 70, 71, 72, 69, 69, 69, 70, 71, 71, 73, 72, 71, 73, 71, 71, 71, 75, 79, 77, 77, 80, 83, 83, 83, 89, 108, 195, 208, 212, 209, 209, 210, 210, 210, 210, 210, 210, 210, 210, 210, 210, 211, 211, 211, 211, 211, 211, 211, 211, 211, 211, 211, 211, 210, 209, 209, 209, 209, 209, 209, 208, 209, 209, 209, 209, 209, 209, 209, 209, 208, 208, 208, 208, 208, 208, 208, 214, 214, 214, 216, 216, 216, 216, 216, 218, 218, 218, 218, 217, 217, 217, 217, 217, 217, 216, 217, 217, 217, 217, 217, 217, 218, 219, 219, 219, 219, 219, 218, 218, 218, 218, 217, 217, 217, 217, 218, 218, 217, 217, 218, 218, 218, 217, 216, 217, 217, 217, 216, 216, 216, 216, 216, 216, 215, 215, 215, 216, 217, 217, 217, 215, 216, 216, 216, 216, 216, 216, 216, 216, 215, 215, 215, 214, 214, 214, 214, 214, 214, 214, 214, 214, 214, 214, 214, 214, 214, 214, 217, 216, 213, 214, 215, 214, 214, 214, 131, 63, 59, 67, 68, 67, 68, 61, 58, 66, 68, 69, 69, 69, 67, 68, 66, 63, 65, 70, 69, 68, 67, 65, 67, 60, 60, 63, 65, 65, 63, 66, 69, 71, 74, 74, 69, 68, 67, 67, 73, 68, 63, 61, 68, 65, 71, 74, 73, 72, 73, 75, 73, 69, 67, 63, 67, 64, 61, 61, 67, 69, 62, 63, 73, 76, 68, 68, 71, 69, 70, 70, 71, 75, 74, 71, 71, 72, 71, 72, 73, 73, 71, 71, 72, 71, 70, 70, 71, 70, 71, 72, 71, 70, 68, 67, 70, 72, 74, 77, 78, 77, 81, 81, 83, 86, 100, 184, 206, 211, 211, 210, 210, 210, 209, 210, 210, 210, 210, 210, 210, 210, 210, 210, 211, 211, 211, 211, 211, 212, 211, 211, 210, 210, 209, 209, 209, 209, 209, 209, 209, 208, 209, 209, 209, 209, 209, 208, 209, 209, 208, 208, 208, 208, 207, 207, 207, 214, 214, 214, 215, 215, 215, 216, 216, 216, 217, 218, 219, 217, 216, 217, 217, 217, 216, 217, 218, 218, 219, 219, 219, 218, 219, 219, 219, 219, 218, 218, 218, 218, 218, 217, 216, 217, 218, 216, 217, 217, 217, 217, 218, 218, 218, 217, 216, 216, 217, 217, 216, 215, 216, 216, 216, 216, 216, 216, 216, 216, 216, 216, 215, 215, 215, 216, 216, 216, 216, 216, 216, 216, 214, 214, 215, 215, 214, 214, 214, 214, 214, 214, 214, 214, 214, 214, 214, 214, 214, 214, 217, 215, 213, 213, 216, 215, 213, 213, 125, 66, 66, 69, 69, 72, 64, 64, 67, 69, 70, 72, 72, 67, 71, 66, 64, 60, 61, 70, 71, 68, 65, 64, 60, 61, 68, 67, 66, 68, 61, 60, 64, 63, 63, 69, 68, 66, 63, 69, 64, 65, 63, 67, 68, 67, 69, 71, 71, 69, 69, 72, 73, 69, 66, 60, 65, 64, 63, 62, 71, 70, 67, 67, 68, 71, 68, 69, 72, 72, 72, 71, 69, 72, 73, 73, 73, 72, 69, 73, 72, 72, 71, 72, 71, 69, 69, 70, 69, 68, 67, 70, 77, 75, 71, 69, 71, 71, 73, 77, 81, 77, 84, 79, 84, 86, 91, 172, 205, 208, 212, 210, 211, 211, 211, 210, 210, 210, 210, 210, 210, 210, 210, 210, 210, 210, 210, 210, 210, 211, 210, 210, 210, 210, 209, 209, 209, 209, 209, 209, 210, 209, 209, 209, 209, 209, 209, 208, 208, 208, 208, 208, 208, 207, 207, 207, 207, 213, 214, 213, 214, 215, 217, 218, 217, 217, 217, 217, 216, 215, 216, 217, 217, 217, 216, 216, 218, 218, 218, 219, 217, 217, 217, 218, 219, 219, 219, 217, 218, 218, 218, 219, 218, 218, 218, 218, 218, 218, 218, 218, 218, 218, 218, 218, 217, 217, 218, 217, 217, 216, 216, 216, 216, 216, 217, 217, 216, 216, 216, 216, 216, 215, 215, 216, 216, 216, 216, 216, 216, 216, 216, 215, 215, 215, 214, 214, 214, 214, 214, 214, 214, 214, 214, 214, 214, 214, 214, 214, 216, 214, 214, 214, 217, 217, 214, 212, 117, 73, 72, 70, 70, 71, 63, 67, 71, 74, 73, 72, 70, 67, 67, 67, 65, 60, 64, 75, 71, 68, 59, 61, 72, 72, 67, 64, 65, 73, 75, 68, 61, 71, 72, 72, 77, 76, 66, 67, 69, 69, 68, 65, 69, 69, 64, 66, 70, 70, 71, 71, 71, 69, 68, 68, 67, 66, 68, 70, 74, 80, 77, 76, 74, 74, 67, 67, 66, 72, 68, 69, 70, 69, 71, 72, 70, 69, 71, 71, 69, 68, 68, 69, 61, 61, 63, 64, 69, 71, 70, 75, 69, 71, 72, 73, 71, 74, 78, 73, 81, 84, 85, 83, 77, 80, 84, 155, 207, 214, 214, 212, 212, 212, 212, 211, 210, 210, 210, 210, 210, 210, 210, 210, 210, 210, 210, 210, 210, 210, 209, 210, 210, 210, 209, 208, 208, 208, 208, 209, 209, 209, 208, 208, 208, 208, 208, 208, 208, 208, 208, 207, 207, 207, 207, 207, 207, 214, 214, 214, 214, 214, 217, 217, 217, 217, 215, 215, 215, 216, 216, 216, 217, 217, 217, 217, 218, 217, 218, 220, 219, 217, 217, 217, 218, 218, 218, 218, 219, 219, 219, 219, 218, 218, 218, 218, 218, 218, 218, 218, 218, 218, 217, 216, 215, 215, 216, 217, 217, 216, 216, 217, 217, 217, 216, 216, 216, 216, 216, 216, 216, 216, 216, 216, 216, 216, 216, 216, 217, 217, 216, 215, 215, 215, 214, 214, 214, 215, 215, 215, 215, 214, 214, 214, 214, 214, 213, 213, 214, 213, 212, 213, 215, 215, 212, 211, 115, 73, 69, 65, 66, 67, 60, 68, 69, 71, 68, 70, 69, 69, 66, 68, 66, 62, 61, 67, 66, 60, 63, 66, 76, 73, 69, 66, 67, 77, 75, 69, 71, 74, 74, 74, 79, 76, 63, 68, 68, 69, 68, 64, 67, 67, 64, 70, 72, 72, 70, 67, 73, 71, 69, 72, 72, 71, 65, 66, 71, 81, 83, 80, 79, 82, 79, 74, 70, 73, 67, 68, 68, 66, 71, 69, 65, 67, 71, 68, 70, 66, 65, 73, 69, 68, 68, 66, 68, 76, 74, 73, 69, 70, 71, 71, 68, 73, 77, 67, 78, 87, 84, 85, 75, 78, 89, 137, 208, 210, 212, 212, 212, 211, 210, 209, 210, 210, 210, 210, 210, 210, 210, 210, 210, 210, 210, 210, 210, 210, 210, 210, 210, 210, 209, 208, 208, 208, 208, 208, 208, 209, 208, 208, 208, 207, 207, 207, 207, 207, 207, 207, 207, 207, 207, 207, 207, 213, 213, 214, 214, 215, 217, 217, 217, 216, 215, 215, 216, 216, 216, 216, 217, 217, 217, 216, 218, 218, 218, 219, 219, 218, 217, 216, 217, 219, 218, 218, 220, 219, 219, 219, 218, 218, 218, 218, 218, 218, 218, 218, 218, 218, 218, 217, 216, 216, 217, 217, 217, 217, 217, 217, 217, 217, 217, 216, 216, 216, 216, 216, 216, 216, 216, 216, 216, 216, 216, 216, 217, 217, 216, 215, 214, 215, 215, 215, 215, 215, 215, 215, 215, 215, 214, 214, 214, 213, 213, 213, 213, 213, 212, 213, 215, 214, 211, 208, 106, 69, 67, 67, 69, 67, 61, 69, 66, 67, 72, 66, 70, 66, 69, 67, 63, 59, 65, 74, 74, 70, 69, 66, 72, 72, 72, 69, 70, 68, 69, 76, 72, 71, 69, 65, 66, 71, 68, 70, 66, 69, 65, 70, 71, 68, 66, 70, 70, 68, 69, 72, 72, 69, 68, 70, 76, 75, 69, 64, 67, 63, 55, 44, 37, 51, 62, 77, 75, 77, 72, 69, 64, 65, 68, 71, 71, 69, 70, 72, 66, 64, 67, 70, 72, 71, 69, 71, 74, 72, 72, 69, 67, 71, 75, 75, 71, 71, 77, 74, 78, 88, 84, 80, 78, 79, 87, 124, 206, 211, 211, 211, 210, 210, 210, 209, 209, 210, 210, 210, 210, 210, 210, 210, 210, 210, 210, 210, 210, 210, 210, 210, 210, 210, 209, 208, 208, 208, 208, 208, 208, 208, 208, 208, 207, 207, 207, 207, 207, 207, 207, 207, 207, 207, 207, 207, 207, 213, 213, 213, 214, 215, 217, 215, 216, 217, 216, 216, 216, 216, 216, 216, 217, 217, 217, 216, 217, 218, 218, 218, 219, 219, 218, 218, 220, 219, 219, 219, 219, 219, 219, 219, 218, 218, 218, 218, 218, 218, 218, 218, 218, 218, 218, 218, 218, 218, 216, 217, 217, 217, 217, 217, 217, 217, 216, 216, 216, 216, 216, 216, 216, 216, 216, 216, 216, 215, 216, 217, 217, 217, 216, 216, 215, 214, 214, 214, 215, 215, 215, 215, 215, 214, 214, 214, 214, 213, 213, 213, 213, 212, 211, 211, 213, 213, 213, 206, 102, 72, 71, 68, 71, 66, 66, 65, 65, 69, 70, 66, 67, 67, 68, 67, 64, 64, 67, 66, 62, 58, 56, 69, 74, 72, 71, 74, 73, 68, 73, 75, 70, 70, 67, 62, 64, 65, 66, 65, 67, 66, 68, 69, 67, 69, 69, 72, 72, 72, 70, 74, 70, 66, 60, 52, 45, 38, 35, 31, 30, 30, 29, 27, 23, 26, 28, 35, 41, 46, 57, 65, 70, 65, 69, 69, 71, 72, 69, 68, 70, 69, 67, 70, 68, 70, 71, 67, 67, 70, 69, 70, 66, 70, 75, 73, 70, 71, 75, 77, 75, 88, 82, 79, 77, 79, 85, 110, 204, 208, 208, 210, 211, 209, 210, 209, 209, 210, 210, 210, 210, 210, 210, 210, 210, 210, 210, 210, 210, 210, 210, 210, 209, 210, 209, 208, 208, 208, 208, 207, 207, 208, 207, 208, 207, 207, 207, 207, 207, 207, 206, 206, 206, 206, 207, 207, 207, 213, 213, 213, 214, 215, 217, 215, 216, 217, 216, 216, 216, 216, 216, 216, 217, 217, 218, 218, 219, 219, 219, 219, 219, 218, 218, 218, 219, 219, 219, 219, 219, 219, 218, 218, 218, 218, 218, 218, 218, 218, 218, 218, 218, 219, 219, 219, 220, 219, 218, 217, 216, 215, 216, 217, 217, 217, 216, 216, 216, 216, 215, 215, 214, 216, 216, 216, 216, 217, 217, 216, 216, 215, 215, 215, 216, 216, 215, 215, 215, 215, 215, 214, 214, 214, 214, 214, 214, 214, 213, 213, 213, 212, 210, 211, 212, 214, 210, 205, 100, 77, 63, 71, 70, 65, 69, 68, 66, 69, 69, 66, 68, 67, 67, 64, 65, 64, 64, 61, 63, 60, 56, 67, 73, 73, 72, 72, 71, 68, 66, 59, 66, 66, 66, 63, 63, 67, 65, 64, 66, 67, 64, 69, 70, 70, 67, 70, 65, 58, 51, 41, 34, 32, 34, 32, 33, 27, 15, 6, 4, 5, 4, 13, 10, 5, 8, 7, 13, 10, 12, 19, 28, 32, 37, 48, 58, 67, 79, 79, 73, 71, 71, 68, 65, 71, 70, 68, 68, 69, 71, 70, 70, 68, 64, 72, 72, 73, 72, 73, 74, 80, 80, 87, 86, 81, 78, 83, 83, 99, 195, 204, 208, 209, 209, 209, 210, 210, 210, 210, 210, 210, 210, 210, 210, 210, 210, 210, 210, 210, 210, 210, 210, 210, 209, 209, 208, 208, 208, 208, 208, 207, 207, 207, 207, 208, 207, 206, 206, 207, 207, 207, 206, 206, 206, 206, 207, 207, 207, 213, 213, 213, 214, 214, 216, 215, 216, 217, 216, 216, 216, 216, 216, 216, 217, 217, 219, 219, 219, 219, 219, 219, 218, 218, 218, 218, 219, 219, 219, 218, 218, 218, 217, 217, 218, 218, 218, 218, 218, 218, 218, 218, 219, 219, 219, 219, 219, 219, 218, 218, 217, 216, 217, 217, 217, 217, 216, 216, 216, 217, 216, 216, 215, 216, 216, 216, 216, 217, 217, 216, 216, 215, 215, 216, 216, 216, 216, 215, 215, 215, 215, 214, 214, 214, 214, 214, 214, 214, 214, 214, 213, 213, 211, 211, 212, 215, 208, 202, 94, 66, 70, 73, 68, 69, 67, 69, 69, 68, 64, 64, 68, 67, 68, 70, 65, 61, 63, 65, 62, 59, 60, 69, 75, 80, 76, 64, 63, 70, 61, 59, 63, 62, 65, 64, 63, 66, 64, 68, 65, 66, 67, 65, 58, 54, 43, 32, 27, 26, 27, 27, 24, 14, 7, 6, 3, 5, 11, 13, 18, 36, 38, 28, 35, 23, 19, 19, 11, 13, 10, 9, 6, 9, 21, 30, 32, 36, 44, 55, 64, 69, 69, 72, 68, 69, 66, 68, 72, 72, 72, 71, 71, 75, 69, 74, 75, 71, 73, 74, 80, 82, 85, 89, 85, 81, 80, 83, 95, 175, 202, 205, 208, 209, 209, 210, 210, 210, 210, 210, 210, 210, 210, 210, 210, 210, 210, 210, 210, 210, 210, 210, 210, 209, 209, 208, 208, 208, 208, 208, 207, 207, 207, 207, 208, 207, 206, 206, 207, 207, 207, 206, 206, 206, 206, 207, 207, 207, 214, 214, 214, 215, 215, 216, 216, 216, 217, 216, 216, 216, 216, 216, 216, 216, 217, 217, 218, 218, 218, 218, 219, 218, 218, 218, 218, 219, 219, 219, 218, 218, 218, 217, 217, 217, 217, 217, 217, 218, 218, 217, 218, 219, 220, 219, 219, 220, 219, 219, 218, 217, 217, 217, 217, 216, 216, 216, 216, 215, 217, 217, 216, 216, 215, 215, 216, 215, 214, 214, 215, 215, 214, 215, 215, 215, 215, 214, 214, 214, 214, 214, 213, 214, 214, 214, 213, 213, 213, 213, 213, 212, 213, 213, 212, 213, 213, 208, 200, 92, 75, 72, 67, 66, 63, 64, 69, 75, 72, 63, 65, 66, 68, 68, 65, 60, 59, 62, 59, 61, 60, 57, 62, 69, 64, 65, 63, 63, 64, 62, 63, 68, 67, 65, 70, 69, 69, 61, 54, 44, 42, 44, 39, 30, 27, 21, 16, 8, 7, 3, 1, 2, 3, 3, 4, 3, 22, 39, 41, 49, 54, 54, 43, 41, 33, 26, 30, 35, 27, 8, 13, 10, 9, 8, 7, 6, 11, 16, 21, 28, 36, 37, 55, 59, 65, 71, 74, 68, 69, 67, 68, 70, 74, 65, 72, 72, 72, 70, 70, 74, 80, 81, 86, 87, 85, 78, 81, 87, 153, 206, 207, 209, 209, 208, 209, 211, 211, 211, 211, 210, 210, 210, 209, 210, 210, 210, 210, 210, 210, 211, 211, 211, 209, 209, 209, 209, 209, 209, 207, 207, 206, 205, 207, 207, 206, 207, 206, 207, 207, 207, 206, 204, 204, 206, 207, 206, 205, 216, 216, 216, 216, 216, 216, 217, 217, 217, 217, 217, 217, 216, 216, 216, 216, 216, 216, 218, 217, 217, 217, 219, 219, 219, 219, 219, 219, 219, 219, 218, 217, 219, 218, 217, 216, 216, 216, 216, 217, 217, 219, 220, 219, 219, 218, 219, 219, 219, 218, 218, 217, 216, 216, 217, 217, 217, 217, 216, 216, 217, 216, 215, 216, 214, 213, 214, 215, 212, 213, 214, 214, 214, 214, 214, 215, 214, 213, 213, 213, 213, 213, 214, 214, 214, 214, 213, 213, 213, 213, 213, 211, 213, 214, 213, 213, 213, 210, 201, 99, 80, 73, 67, 64, 61, 69, 63, 71, 72, 71, 65, 66, 71, 65, 61, 58, 63, 69, 61, 61, 65, 66, 69, 65, 64, 66, 65, 66, 62, 58, 61, 67, 63, 53, 43, 34, 30, 32, 35, 28, 17, 12, 7, 9, 2, 3, 5, 2, 13, 25, 32, 39, 35, 20, 27, 32, 44, 50, 50, 55, 53, 48, 47, 41, 33, 38, 41, 32, 39, 37, 36, 25, 15, 6, 3, 4, 7, 4, 13, 10, 15, 26, 25, 29, 33, 51, 62, 68, 71, 66, 64, 67, 68, 69, 73, 72, 73, 73, 76, 80, 77, 81, 84, 83, 72, 82, 85, 137, 209, 206, 208, 209, 208, 210, 210, 210, 212, 212, 211, 210, 210, 208, 209, 209, 209, 209, 209, 210, 211, 212, 211, 209, 210, 210, 210, 210, 209, 208, 208, 207, 206, 206, 207, 205, 206, 206, 207, 207, 206, 206, 204, 204, 205, 206, 205, 204, 216, 216, 216, 216, 216, 216, 217, 217, 217, 217, 217, 217, 216, 216, 216, 216, 216, 216, 217, 217, 217, 217, 219, 219, 219, 219, 218, 218, 218, 217, 217, 216, 217, 217, 218, 217, 217, 217, 218, 217, 217, 217, 218, 218, 218, 219, 219, 219, 219, 218, 218, 217, 216, 216, 216, 216, 216, 216, 216, 215, 215, 215, 214, 213, 214, 213, 212, 214, 213, 213, 214, 214, 213, 213, 213, 214, 214, 213, 213, 213, 213, 213, 214, 214, 214, 213, 213, 213, 213, 213, 213, 211, 213, 214, 213, 213, 213, 207, 199, 94, 80, 75, 72, 61, 61, 64, 63, 72, 70, 72, 72, 69, 73, 71, 64, 65, 74, 89, 74, 71, 67, 64, 65, 63, 61, 64, 61, 63, 57, 47, 42, 36, 33, 31, 24, 21, 16, 13, 9, 8, 4, 3, 2, 3, 13, 18, 27, 27, 27, 20, 58, 41, 34, 19, 15, 62, 45, 48, 54, 49, 52, 54, 55, 53, 48, 44, 48, 49, 40, 49, 44, 15, 38, 29, 53, 35, 27, 9, 6, 3, 8, 5, 5, 13, 10, 17, 27, 30, 31, 40, 47, 59, 71, 79, 78, 75, 68, 75, 75, 74, 79, 75, 79, 80, 83, 74, 79, 88, 120, 209, 207, 208, 209, 207, 208, 210, 210, 210, 210, 210, 210, 210, 208, 208, 208, 208, 208, 208, 208, 208, 209, 208, 208, 208, 208, 208, 208, 208, 208, 208, 208, 206, 206, 206, 207, 206, 205, 206, 206, 206, 206, 204, 204, 204, 206, 205, 205, 216, 216, 216, 216, 216, 216, 217, 217, 217, 217, 217, 217, 216, 216, 216, 216, 216, 216, 216, 216, 216, 217, 219, 219, 219, 218, 218, 217, 217, 217, 217, 217, 217, 218, 218, 217, 217, 218, 218, 218, 217, 217, 218, 219, 219, 219, 219, 219, 218, 218, 217, 217, 216, 215, 216, 217, 217, 218, 218, 218, 217, 217, 217, 214, 213, 214, 212, 212, 213, 214, 214, 213, 213, 213, 213, 214, 214, 213, 213, 213, 213, 213, 213, 214, 214, 213, 213, 213, 213, 213, 213, 211, 213, 214, 213, 212, 216, 209, 195, 89, 81, 71, 69, 60, 67, 69, 65, 73, 69, 67, 68, 66, 68, 67, 63, 64, 74, 74, 36, 46, 65, 64, 58, 52, 43, 38, 30, 29, 27, 28, 27, 18, 17, 15, 8, 6, 4, 6, 6, 15, 27, 28, 40, 27, 26, 46, 31, 39, 51, 66, 30, 44, 43, 29, 43, 32, 54, 62, 61, 54, 56, 62, 63, 57, 60, 56, 46, 45, 48, 46, 32, 35, 37, 57, 47, 60, 57, 59, 33, 36, 24, 18, 8, 6, 5, 4, 6, 13, 10, 20, 23, 26, 33, 36, 49, 60, 68, 77, 79, 74, 82, 79, 84, 77, 81, 82, 77, 85, 103, 202, 204, 206, 206, 206, 208, 207, 207, 207, 208, 208, 209, 209, 208, 208, 209, 209, 209, 209, 208, 208, 207, 208, 208, 208, 208, 208, 208, 208, 207, 207, 207, 206, 206, 206, 209, 206, 205, 205, 206, 206, 206, 205, 204, 204, 205, 204, 204, 216, 216, 216, 216, 216, 216, 217, 218, 217, 217, 217, 217, 216, 216, 214, 213, 214, 215, 216, 217, 217, 218, 219, 220, 219, 218, 218, 217, 217, 217, 217, 217, 216, 217, 218, 218, 218, 217, 217, 218, 218, 217, 218, 219, 219, 219, 219, 218, 218, 218, 218, 217, 216, 216, 215, 216, 216, 219, 218, 213, 217, 213, 212, 209, 214, 211, 214, 216, 212, 214, 214, 214, 214, 214, 213, 213, 213, 213, 213, 213, 213, 213, 213, 213, 213, 213, 213, 213, 213, 213, 213, 211, 213, 213, 213, 213, 212, 210, 196, 93, 81, 68, 68, 50, 64, 68, 62, 70, 71, 73, 72, 67, 69, 60, 58, 62, 63, 62, 58, 45, 40, 35, 31, 31, 26, 25, 15, 13, 13, 10, 7, 13, 10, 12, 11, 11, 24, 30, 35, 39, 27, 37, 35, 15, 41, 37, 36, 17, 66, 39, 34, 48, 44, 29, 20, 56, 47, 29, 52, 64, 66, 60, 65, 70, 68, 66, 70, 61, 47, 43, 37, 36, 20, 49, 64, 29, 47, 70, 53, 37, 69, 37, 38, 48, 40, 23, 33, 17, 13, 10, 7, 6, 8, 4, 13, 10, 19, 27, 33, 35, 33, 44, 53, 74, 81, 90, 86, 80, 84, 81, 78, 96, 197, 210, 206, 202, 207, 207, 207, 207, 207, 208, 208, 208, 209, 208, 208, 208, 208, 208, 208, 208, 208, 208, 208, 208, 209, 208, 207, 208, 208, 206, 207, 207, 206, 206, 206, 206, 206, 206, 206, 206, 206, 206, 204, 204, 204, 204, 204, 204, 216, 216, 216, 216, 215, 216, 217, 216, 217, 217, 217, 217, 216, 216, 217, 217, 217, 218, 217, 218, 219, 219, 220, 219, 218, 217, 217, 217, 217, 217, 217, 217, 217, 217, 218, 218, 218, 217, 217, 218, 218, 218, 219, 219, 219, 219, 218, 218, 218, 218, 218, 217, 216, 216, 216, 210, 216, 213, 216, 195, 210, 215, 211, 141, 210, 214, 211, 210, 213, 214, 214, 214, 214, 214, 213, 213, 213, 213, 213, 213, 213, 213, 213, 213, 213, 213, 213, 213, 213, 213, 213, 211, 213, 213, 213, 213, 211, 209, 193, 87, 74, 65, 58, 64, 56, 64, 62, 67, 67, 68, 68, 65, 60, 49, 35, 34, 28, 23, 25, 28, 30, 22, 14, 13, 10, 7, 6, 1, 17, 29, 30, 27, 27, 37, 36, 50, 42, 5, 26, 50, 36, 15, 35, 24, 30, 39, 45, 24, 52, 48, 13, 17, 13, 49, 24, 55, 56, 57, 67, 70, 70, 71, 69, 66, 65, 73, 65, 54, 50, 38, 48, 52, 49, 40, 36, 19, 13, 44, 60, 51, 42, 57, 47, 46, 53, 41, 34, 45, 35, 26, 17, 5, 16, 11, 13, 10, 11, 14, 19, 30, 28, 33, 36, 45, 61, 73, 75, 85, 79, 93, 182, 208, 208, 206, 206, 207, 207, 208, 208, 208, 208, 209, 209, 208, 208, 207, 207, 207, 207, 207, 208, 208, 208, 208, 208, 207, 207, 207, 206, 206, 207, 207, 206, 205, 206, 206, 205, 205, 206, 206, 206, 206, 204, 204, 204, 204, 204, 204, 216, 215, 215, 215, 214, 215, 217, 215, 216, 215, 216, 216, 216, 216, 216, 217, 217, 217, 217, 217, 217, 218, 219, 219, 218, 217, 217, 217, 217, 217, 217, 217, 218, 218, 218, 218, 218, 219, 219, 219, 219, 218, 218, 218, 217, 217, 218, 218, 218, 218, 218, 217, 216, 216, 214, 213, 212, 212, 133, 203, 211, 210, 213, 109, 199, 213, 211, 215, 213, 214, 214, 214, 214, 214, 213, 213, 213, 213, 213, 213, 213, 213, 213, 213, 213, 213, 213, 213, 213, 213, 213, 211, 213, 214, 214, 214, 211, 211, 190, 85, 73, 63, 61, 62, 66, 64, 60, 59, 43, 42, 37, 34, 31, 28, 25, 20, 16, 9, 5, 5, 8, 7, 5, 8, 9, 13, 13, 42, 49, 37, 33, 36, 41, 35, 43, 45, 29, 28, 32, 34, 24, 13, 55, 48, 7, 13, 10, 30, 50, 36, 56, 8, 47, 66, 48, 17, 54, 63, 69, 68, 70, 70, 68, 66, 71, 70, 71, 65, 62, 51, 33, 42, 53, 45, 5, 13, 10, 54, 50, 44, 35, 14, 37, 42, 50, 29, 72, 55, 3, 33, 41, 27, 40, 29, 28, 28, 26, 9, 8, 13, 10, 12, 12, 21, 26, 28, 32, 37, 49, 68, 143, 205, 207, 206, 206, 206, 208, 208, 209, 210, 208, 208, 208, 207, 207, 208, 208, 208, 208, 207, 207, 207, 207, 207, 207, 207, 207, 206, 206, 207, 208, 207, 206, 206, 206, 206, 206, 206, 206, 206, 206, 206, 204, 204, 204, 204, 204, 204, 215, 215, 215, 215, 215, 216, 217, 216, 217, 218, 217, 216, 217, 218, 217, 217, 217, 219, 220, 219, 218, 218, 219, 218, 218, 217, 217, 216, 217, 218, 217, 217, 218, 219, 218, 219, 220, 219, 219, 219, 219, 218, 219, 218, 217, 217, 218, 218, 218, 217, 219, 216, 215, 216, 219, 219, 219, 197, 90, 146, 204, 194, 177, 85, 166, 172, 207, 208, 214, 214, 214, 214, 212, 214, 214, 213, 213, 213, 213, 213, 213, 213, 213, 213, 213, 213, 213, 213, 213, 213, 213, 213, 214, 209, 212, 209, 209, 214, 178, 79, 68, 62, 55, 48, 40, 32, 34, 31, 30, 31, 25, 17, 15, 14, 15, 9, 7, 8, 9, 15, 15, 15, 13, 33, 21, 17, 48, 42, 45, 37, 37, 37, 48, 46, 49, 12, 30, 56, 21, 5, 4, 43, 30, 49, 43, 23, 63, 57, 11, 54, 45, 32, 56, 66, 46, 60, 59, 70, 71, 72, 73, 71, 66, 75, 74, 75, 74, 69, 61, 44, 48, 64, 42, 31, 22, 41, 54, 53, 20, 8, 60, 48, 20, 57, 44, 59, 64, 54, 38, 31, 38, 27, 23, 36, 58, 28, 3, 5, 13, 10, 5, 11, 13, 15, 14, 27, 28, 32, 46, 44, 78, 144, 190, 205, 204, 201, 200, 201, 204, 203, 203, 206, 206, 209, 206, 209, 207, 207, 207, 207, 206, 207, 207, 207, 206, 206, 206, 207, 206, 205, 206, 206, 206, 206, 206, 206, 204, 204, 204, 204, 204, 204, 204, 204, 204, 204, 212, 214, 215, 216, 216, 217, 218, 218, 218, 218, 217, 217, 217, 218, 218, 217, 218, 219, 217, 217, 218, 218, 219, 219, 218, 217, 217, 216, 217, 218, 218, 219, 217, 217, 217, 218, 219, 219, 219, 219, 219, 218, 218, 218, 217, 217, 217, 218, 217, 217, 216, 216, 216, 217, 218, 218, 214, 209, 113, 80, 99, 98, 48, 138, 144, 103, 198, 210, 214, 214, 214, 214, 212, 214, 213, 213, 213, 213, 213, 213, 213, 213, 213, 213, 213, 213, 213, 213, 213, 213, 213, 214, 210, 213, 210, 208, 209, 184, 127, 52, 37, 34, 29, 26, 27, 19, 19, 12, 11, 13, 10, 9, 11, 13, 6, 11, 17, 15, 13, 19, 15, 34, 43, 39, 24, 21, 52, 46, 41, 46, 43, 42, 45, 51, 39, 49, 47, 51, 19, 68, 16, 9, 48, 67, 54, 17, 56, 41, 60, 61, 64, 46, 57, 69, 24, 15, 51, 43, 58, 63, 69, 70, 68, 68, 66, 71, 69, 70, 73, 67, 60, 62, 32, 4, 47, 55, 49, 36, 58, 32, 16, 4, 37, 30, 48, 11, 5, 44, 47, 18, 36, 38, 46, 34, 24, 34, 60, 53, 17, 14, 20, 17, 17, 19, 9, 3, 8, 9, 13, 17, 26, 32, 39, 46, 65, 93, 136, 176, 197, 203, 204, 203, 205, 204, 206, 207, 209, 209, 206, 207, 207, 206, 207, 207, 207, 206, 206, 206, 206, 206, 206, 205, 206, 206, 206, 206, 206, 204, 204, 204, 204, 204, 204, 204, 204, 204, 204, 213, 213, 213, 215, 215, 217, 218, 218, 219, 218, 218, 218, 217, 217, 218, 218, 218, 218, 220, 219, 219, 218, 219, 219, 218, 217, 217, 217, 217, 217, 218, 220, 217, 216, 217, 217, 217, 217, 217, 217, 217, 219, 219, 218, 218, 217, 217, 217, 217, 216, 216, 217, 216, 215, 215, 214, 211, 211, 200, 97, 53, 46, 34, 82, 98, 130, 201, 211, 214, 214, 214, 213, 213, 213, 213, 213, 213, 213, 213, 213, 213, 213, 213, 213, 213, 213, 213, 213, 213, 213, 213, 212, 213, 213, 208, 209, 143, 40, 35, 32, 22, 18, 12, 9, 9, 5, 7, 6, 13, 10, 5, 17, 20, 27, 30, 17, 29, 39, 40, 24, 42, 54, 27, 43, 44, 28, 12, 32, 45, 60, 49, 45, 54, 52, 35, 61, 43, 59, 67, 33, 33, 64, 37, 53, 60, 59, 32, 65, 52, 31, 66, 63, 56, 38, 62, 42, 36, 47, 40, 49, 65, 68, 68, 66, 55, 58, 63, 68, 56, 38, 47, 49, 29, 37, 42, 39, 42, 56, 22, 45, 57, 49, 30, 59, 42, 24, 15, 40, 17, 53, 50, 43, 41, 40, 28, 36, 63, 63, 37, 28, 11, 38, 53, 38, 17, 29, 20, 17, 13, 1, 4, 13, 17, 18, 26, 33, 38, 43, 56, 82, 126, 176, 201, 207, 209, 205, 205, 205, 207, 206, 206, 206, 207, 207, 207, 206, 206, 206, 206, 206, 206, 205, 206, 206, 206, 206, 206, 204, 204, 204, 204, 204, 204, 204, 204, 204, 204, 212, 213, 213, 214, 214, 216, 218, 218, 218, 218, 219, 218, 217, 216, 218, 219, 218, 217, 218, 218, 218, 218, 219, 219, 218, 217, 217, 217, 217, 216, 216, 218, 216, 215, 217, 217, 215, 215, 215, 216, 216, 217, 217, 217, 216, 215, 216, 217, 216, 216, 216, 215, 216, 216, 216, 216, 215, 211, 217, 214, 107, 50, 49, 66, 134, 204, 207, 212, 213, 214, 213, 213, 213, 213, 213, 213, 213, 213, 213, 213, 213, 213, 213, 213, 213, 213, 213, 213, 213, 213, 213, 212, 211, 210, 211, 159, 41, 18, 14, 13, 12, 14, 21, 24, 21, 12, 13, 19, 26, 12, 30, 34, 32, 19, 39, 37, 29, 73, 50, 40, 45, 51, 5, 48, 56, 28, 47, 31, 48, 58, 58, 56, 57, 35, 51, 27, 39, 56, 60, 59, 35, 67, 26, 40, 62, 63, 40, 43, 64, 31, 55, 57, 69, 63, 60, 64, 62, 63, 56, 62, 63, 65, 66, 49, 49, 54, 57, 62, 50, 65, 69, 68, 68, 66, 53, 64, 32, 45, 39, 50, 23, 56, 36, 48, 62, 56, 22, 59, 56, 27, 48, 43, 49, 31, 30, 55, 60, 36, 14, 55, 47, 38, 32, 42, 28, 29, 39, 37, 18, 21, 19, 13, 10, 6, 13, 10, 8, 14, 21, 19, 29, 45, 53, 54, 77, 140, 201, 201, 207, 208, 206, 206, 206, 207, 207, 207, 206, 206, 206, 206, 205, 205, 206, 206, 206, 206, 206, 206, 204, 204, 204, 204, 204, 204, 204, 204, 204, 204, 212, 213, 214, 214, 214, 215, 218, 218, 219, 219, 219, 218, 218, 217, 218, 218, 218, 217, 216, 217, 218, 218, 218, 219, 218, 218, 217, 217, 217, 217, 217, 217, 216, 216, 216, 216, 216, 216, 216, 217, 217, 217, 217, 217, 217, 216, 215, 215, 215, 215, 215, 215, 215, 215, 215, 216, 217, 215, 213, 212, 210, 99, 174, 205, 207, 209, 210, 211, 213, 213, 213, 213, 213, 213, 213, 213, 213, 213, 213, 213, 212, 212, 213, 214, 213, 213, 213, 213, 212, 214, 212, 212, 214, 207, 163, 44, 19, 18, 28, 28, 28, 31, 40, 42, 33, 36, 35, 13, 10, 23, 53, 29, 38, 48, 47, 36, 36, 42, 18, 57, 50, 15, 2, 48, 47, 42, 46, 52, 44, 50, 63, 61, 61, 63, 52, 53, 64, 47, 23, 69, 67, 67, 42, 73, 57, 46, 60, 58, 55, 53, 61, 66, 65, 61, 55, 51, 51, 48, 27, 29, 51, 47, 43, 39, 35, 48, 40, 36, 55, 50, 51, 63, 69, 69, 67, 66, 70, 72, 65, 49, 43, 60, 47, 52, 53, 65, 28, 66, 45, 49, 31, 54, 53, 53, 36, 33, 48, 71, 47, 39, 53, 45, 24, 55, 38, 47, 58, 33, 45, 49, 31, 32, 39, 31, 33, 24, 17, 12, 19, 21, 18, 20, 24, 37, 46, 112, 203, 204, 205, 206, 206, 206, 207, 206, 206, 206, 206, 206, 206, 205, 205, 206, 206, 206, 206, 206, 206, 204, 204, 204, 204, 204, 204, 204, 204, 204, 204, 211, 211, 214, 214, 214, 215, 216, 218, 218, 217, 217, 218, 218, 218, 217, 217, 216, 216, 216, 216, 217, 217, 218, 218, 218, 218, 217, 217, 218, 218, 217, 216, 216, 216, 216, 216, 216, 216, 216, 217, 217, 216, 216, 216, 216, 215, 215, 215, 215, 215, 215, 215, 215, 215, 216, 218, 215, 212, 209, 207, 203, 99, 191, 209, 211, 210, 212, 212, 213, 213, 213, 213, 214, 213, 213, 213, 213, 213, 213, 213, 213, 213, 212, 214, 215, 214, 213, 214, 212, 213, 211, 212, 209, 178, 49, 18, 13, 29, 36, 37, 31, 40, 49, 48, 36, 33, 34, 46, 51, 18, 52, 27, 31, 63, 62, 12, 13, 10, 66, 27, 58, 22, 13, 15, 59, 65, 11, 51, 52, 72, 56, 54, 56, 64, 48, 51, 47, 24, 68, 45, 52, 58, 51, 55, 61, 60, 64, 61, 65, 63, 59, 56, 39, 23, 11, 5, 4, 7, 13, 10, 26, 41, 46, 51, 51, 47, 49, 56, 62, 67, 56, 39, 9, 7, 17, 37, 53, 53, 46, 59, 67, 70, 73, 72, 73, 62, 46, 75, 49, 42, 14, 44, 49, 56, 62, 48, 43, 57, 68, 57, 37, 35, 49, 38, 5, 20, 65, 45, 35, 53, 39, 43, 51, 26, 55, 53, 9, 28, 36, 43, 67, 43, 28, 26, 20, 20, 47, 179, 204, 209, 206, 206, 206, 206, 206, 206, 206, 206, 206, 206, 206, 206, 206, 206, 206, 206, 206, 206, 204, 204, 204, 204, 204, 204, 204, 204, 204, 204, 211, 211, 212, 213, 214, 214, 214, 214, 215, 217, 217, 218, 218, 218, 217, 216, 215, 215, 216, 217, 217, 217, 218, 218, 218, 217, 217, 217, 217, 216, 216, 216, 216, 216, 216, 216, 216, 216, 216, 216, 215, 216, 216, 216, 216, 215, 214, 214, 214, 214, 215, 215, 215, 215, 215, 215, 212, 207, 204, 202, 182, 92, 200, 209, 212, 213, 213, 213, 213, 213, 213, 213, 214, 213, 213, 213, 213, 213, 213, 214, 214, 214, 213, 214, 213, 213, 213, 213, 212, 213, 211, 215, 193, 51, 17, 19, 38, 36, 46, 47, 39, 52, 48, 41, 42, 50, 12, 47, 58, 46, 3, 21, 68, 19, 57, 19, 11, 18, 66, 44, 42, 80, 67, 58, 52, 63, 53, 50, 61, 44, 45, 44, 37, 29, 44, 57, 59, 56, 75, 73, 62, 52, 44, 36, 51, 45, 33, 14, 9, 2, 2, 5, 16, 30, 41, 43, 38, 31, 41, 49, 51, 54, 39, 16, 15, 25, 39, 52, 49, 40, 38, 26, 20, 15, 5, 4, 9, 15, 23, 35, 40, 46, 51, 66, 70, 74, 77, 72, 50, 33, 65, 57, 66, 64, 51, 66, 69, 64, 22, 52, 65, 20, 11, 36, 47, 50, 30, 3, 30, 54, 23, 41, 57, 57, 56, 61, 59, 49, 63, 57, 41, 45, 56, 32, 24, 100, 203, 205, 207, 206, 206, 206, 206, 206, 206, 206, 206, 206, 206, 206, 206, 206, 206, 206, 206, 206, 204, 204, 204, 204, 204, 204, 204, 204, 204, 204, 210, 211, 210, 211, 213, 215, 215, 215, 215, 214, 215, 216, 216, 216, 214, 216, 214, 216, 216, 216, 216, 216, 217, 217, 217, 216, 216, 215, 215, 215, 216, 216, 216, 216, 216, 217, 217, 216, 216, 215, 215, 215, 214, 214, 215, 214, 212, 214, 214, 214, 212, 209, 212, 214, 212, 211, 217, 217, 210, 200, 146, 97, 203, 216, 214, 213, 213, 213, 213, 213, 213, 213, 213, 213, 213, 213, 213, 213, 213, 213, 213, 213, 211, 211, 211, 213, 214, 213, 214, 216, 211, 191, 64, 23, 14, 42, 50, 38, 49, 54, 48, 60, 46, 43, 36, 49, 55, 41, 33, 58, 26, 21, 45, 71, 31, 45, 67, 55, 35, 61, 59, 39, 64, 56, 11, 24, 61, 47, 46, 41, 43, 35, 35, 40, 56, 70, 69, 63, 47, 33, 18, 15, 11, 7, 8, 6, 6, 16, 22, 29, 42, 40, 45, 48, 42, 41, 37, 31, 17, 11, 8, 5, 6, 7, 6, 7, 9, 13, 16, 22, 27, 26, 29, 38, 38, 35, 31, 28, 20, 12, 6, 9, 12, 24, 40, 54, 60, 68, 66, 64, 63, 59, 60, 57, 44, 51, 72, 75, 66, 57, 40, 55, 71, 43, 56, 71, 34, 11, 52, 38, 49, 19, 7, 41, 72, 37, 45, 55, 62, 68, 53, 57, 70, 57, 26, 41, 160, 204, 204, 206, 205, 206, 206, 207, 207, 207, 206, 204, 204, 204, 204, 204, 204, 204, 204, 204, 204, 204, 204, 204, 204, 204, 204, 204, 204, 204, 210, 212, 211, 212, 213, 215, 215, 215, 215, 215, 215, 216, 216, 215, 213, 216, 213, 215, 215, 215, 215, 215, 216, 216, 216, 216, 216, 216, 216, 216, 216, 216, 217, 216, 216, 216, 215, 214, 214, 214, 214, 213, 214, 215, 215, 213, 212, 215, 215, 214, 211, 212, 211, 212, 212, 215, 215, 211, 187, 136, 112, 106, 146, 187, 214, 211, 214, 209, 213, 213, 213, 213, 213, 213, 213, 213, 213, 213, 213, 213, 213, 213, 211, 211, 211, 212, 214, 214, 212, 214, 199, 78, 28, 15, 13, 48, 53, 46, 53, 65, 64, 69, 61, 60, 53, 57, 12, 66, 71, 34, 69, 75, 57, 25, 69, 44, 37, 69, 60, 45, 54, 74, 32, 54, 55, 53, 52, 30, 31, 39, 31, 38, 39, 34, 43, 39, 23, 11, 4, 4, 6, 15, 23, 35, 33, 29, 19, 27, 33, 30, 25, 24, 16, 7, 3, 6, 6, 5, 7, 6, 4, 4, 4, 4, 5, 3, 3, 3, 5, 7, 4, 3, 5, 13, 18, 25, 32, 35, 35, 26, 30, 33, 23, 13, 10, 4, 13, 10, 18, 34, 58, 62, 66, 64, 59, 43, 38, 39, 59, 57, 47, 13, 10, 44, 68, 43, 58, 71, 59, 63, 56, 25, 58, 57, 21, 11, 54, 36, 58, 57, 48, 55, 67, 58, 60, 73, 72, 47, 29, 79, 197, 203, 208, 205, 205, 206, 206, 206, 206, 206, 204, 204, 204, 204, 204, 204, 204, 204, 204, 204, 204, 204, 204, 204, 204, 204, 204, 204, 204, 211, 213, 212, 212, 214, 216, 216, 215, 215, 215, 215, 215, 215, 215, 213, 215, 212, 214, 213, 213, 214, 214, 215, 215, 215, 216, 216, 216, 216, 216, 216, 216, 216, 216, 215, 216, 214, 214, 214, 214, 214, 213, 213, 214, 215, 215, 213, 215, 214, 213, 211, 212, 211, 211, 213, 211, 214, 164, 75, 55, 65, 72, 80, 95, 192, 211, 211, 211, 211, 211, 211, 211, 211, 211, 211, 211, 211, 211, 211, 211, 211, 211, 211, 211, 211, 211, 212, 213, 214, 192, 84, 25, 19, 12, 26, 57, 62, 43, 44, 65, 68, 74, 68, 56, 46, 60, 26, 54, 41, 63, 34, 51, 64, 51, 46, 55, 51, 36, 69, 78, 75, 71, 64, 68, 55, 54, 42, 33, 37, 43, 32, 39, 45, 39, 2, 4, 13, 16, 24, 27, 27, 35, 49, 47, 40, 23, 14, 9, 7, 3, 2, 4, 3, 3, 5, 6, 7, 5, 4, 1, 11, 15, 20, 19, 13, 8, 2, 4, 5, 7, 6, 6, 6, 5, 4, 5, 7, 13, 11, 18, 32, 38, 34, 35, 30, 20, 12, 5, 8, 22, 40, 52, 40, 32, 37, 49, 63, 68, 74, 65, 40, 62, 69, 59, 54, 68, 45, 48, 57, 60, 45, 64, 26, 67, 71, 52, 49, 46, 63, 59, 62, 71, 67, 63, 19, 35, 135, 209, 207, 208, 205, 206, 206, 204, 204, 204, 204, 204, 204, 204, 204, 204, 204, 204, 204, 204, 204, 204, 204, 204, 204, 204, 204, 204, 204, 211, 211, 212, 214, 215, 216, 215, 215, 215, 215, 215, 215, 215, 215, 213, 214, 212, 213, 213, 212, 213, 214, 215, 215, 215, 215, 215, 215, 215, 215, 215, 215, 214, 214, 214, 214, 214, 214, 214, 213, 212, 212, 213, 214, 215, 215, 214, 214, 213, 213, 211, 211, 211, 211, 210, 213, 210, 76, 33, 18, 21, 28, 31, 57, 135, 211, 210, 209, 211, 211, 211, 211, 211, 211, 210, 211, 211, 211, 211, 211, 211, 211, 211, 211, 211, 210, 211, 200, 192, 112, 33, 18, 13, 10, 19, 32, 60, 64, 43, 55, 71, 71, 70, 60, 51, 46, 66, 54, 18, 40, 37, 63, 60, 50, 74, 71, 75, 72, 73, 64, 61, 53, 50, 42, 26, 21, 21, 17, 31, 47, 43, 37, 37, 35, 36, 25, 28, 30, 32, 40, 38, 34, 24, 16, 9, 5, 5, 5, 4, 6, 7, 4, 6, 7, 6, 7, 7, 6, 4, 4, 2, 5, 21, 26, 30, 28, 16, 8, 3, 6, 9, 9, 9, 7, 4, 5, 6, 5, 6, 5, 4, 4, 7, 14, 18, 26, 31, 32, 36, 33, 37, 33, 25, 46, 44, 35, 44, 52, 62, 66, 74, 63, 65, 73, 70, 55, 68, 45, 55, 55, 42, 40, 63, 37, 61, 66, 60, 14, 49, 45, 66, 64, 60, 69, 61, 68, 25, 18, 61, 191, 206, 201, 208, 204, 204, 203, 202, 202, 204, 204, 204, 204, 204, 204, 204, 204, 204, 204, 204, 204, 204, 204, 204, 204, 204, 204, 204, 210, 210, 211, 213, 214, 215, 214, 214, 214, 214, 214, 214, 214, 214, 213, 213, 212, 212, 213, 212, 212, 214, 215, 215, 215, 214, 214, 214, 214, 214, 214, 214, 213, 213, 213, 214, 213, 213, 214, 214, 213, 214, 214, 214, 214, 214, 214, 214, 213, 213, 211, 211, 211, 210, 211, 216, 213, 62, 21, 15, 14, 17, 23, 49, 127, 208, 209, 211, 212, 211, 211, 211, 210, 211, 210, 211, 211, 211, 211, 211, 211, 211, 211, 210, 210, 210, 196, 200, 127, 32, 19, 13, 17, 43, 51, 57, 70, 51, 58, 66, 70, 67, 62, 52, 44, 61, 44, 51, 77, 69, 73, 72, 73, 63, 60, 55, 42, 25, 24, 21, 13, 8, 2, 2, 11, 22, 27, 31, 39, 42, 37, 38, 38, 44, 39, 31, 25, 17, 8, 5, 3, 3, 4, 4, 4, 6, 8, 8, 6, 3, 7, 7, 6, 7, 7, 6, 6, 4, 3, 3, 6, 11, 24, 21, 11, 4, 4, 6, 6, 6, 6, 6, 4, 4, 4, 4, 5, 6, 8, 8, 8, 6, 6, 8, 8, 12, 19, 24, 30, 38, 33, 35, 55, 57, 43, 46, 43, 11, 20, 29, 35, 38, 38, 44, 56, 62, 68, 60, 53, 55, 35, 52, 52, 45, 17, 53, 53, 43, 67, 69, 68, 68, 61, 61, 41, 12, 25, 112, 202, 209, 201, 204, 204, 204, 203, 202, 204, 204, 204, 204, 204, 204, 204, 204, 204, 204, 204, 204, 204, 204, 204, 204, 204, 204, 204, 207, 209, 211, 212, 212, 213, 212, 212, 212, 213, 213, 213, 213, 213, 213, 214, 212, 212, 213, 212, 213, 214, 214, 214, 214, 214, 215, 213, 213, 213, 213, 213, 215, 215, 215, 215, 214, 213, 214, 213, 213, 214, 214, 213, 213, 213, 213, 214, 213, 213, 211, 212, 211, 211, 212, 209, 216, 122, 30, 20, 19, 19, 30, 53, 179, 212, 210, 213, 211, 211, 211, 212, 210, 211, 210, 211, 211, 211, 211, 211, 211, 211, 210, 210, 208, 193, 206, 149, 35, 18, 15, 14, 34, 50, 72, 69, 67, 53, 62, 66, 72, 54, 38, 35, 46, 69, 72, 71, 71, 71, 72, 71, 52, 29, 23, 17, 12, 6, 9, 9, 18, 25, 39, 41, 35, 33, 33, 33, 45, 44, 39, 27, 20, 15, 7, 5, 8, 7, 2, 3, 2, 3, 5, 4, 2, 4, 1, 1, 2, 2, 3, 4, 4, 3, 4, 6, 4, 4, 4, 2, 1, 4, 8, 11, 11, 5, 2, 1, 1, 1, 1, 1, 2, 2, 2, 2, 2, 2, 3, 5, 6, 7, 6, 6, 8, 11, 8, 6, 7, 15, 21, 31, 36, 47, 64, 55, 35, 28, 22, 8, 4, 2, 7, 18, 27, 28, 41, 69, 73, 68, 66, 68, 52, 48, 45, 27, 60, 52, 67, 71, 69, 72, 70, 61, 61, 16, 16, 46, 181, 201, 203, 204, 204, 204, 204, 204, 204, 204, 204, 204, 204, 204, 204, 204, 204, 203, 203, 203, 203, 204, 204, 204, 204, 204, 204, 208, 209, 209, 210, 211, 213, 212, 211, 212, 211, 211, 211, 211, 212, 211, 213, 212, 211, 212, 212, 213, 214, 213, 214, 214, 214, 214, 213, 213, 213, 213, 213, 214, 213, 213, 213, 214, 213, 213, 213, 214, 213, 213, 213, 213, 213, 213, 213, 213, 213, 212, 211, 211, 212, 212, 216, 210, 207, 153, 68, 37, 53, 98, 185, 210, 207, 209, 210, 209, 209, 210, 210, 207, 209, 208, 209, 209, 209, 209, 209, 209, 209, 210, 203, 193, 209, 167, 45, 17, 15, 16, 33, 48, 51, 42, 55, 68, 58, 61, 63, 65, 48, 43, 58, 71, 76, 66, 58, 48, 39, 23, 13, 5, 9, 8, 12, 28, 43, 42, 43, 46, 47, 50, 43, 36, 29, 15, 13, 10, 7, 5, 6, 7, 4, 4, 3, 1, 4, 6, 7, 6, 6, 7, 7, 7, 5, 5, 1, 2, 3, 2, 2, 1, 2, 2, 2, 3, 3, 2, 2, 1, 4, 5, 7, 13, 10, 6, 8, 6, 2, 2, 1, 1, 2, 2, 3, 3, 4, 4, 4, 4, 6, 8, 6, 6, 4, 4, 4, 1, 4, 9, 9, 13, 10, 8, 13, 28, 36, 33, 32, 43, 46, 39, 38, 32, 25, 13, 6, 2, 22, 41, 50, 59, 67, 74, 76, 72, 65, 71, 49, 49, 65, 70, 71, 71, 64, 66, 30, 14, 26, 96, 199, 203, 204, 204, 206, 206, 205, 204, 204, 204, 204, 204, 204, 204, 204, 204, 204, 204, 204, 204, 204, 204, 204, 204, 204, 204, 208, 210, 210, 210, 210, 209, 210, 210, 211, 211, 211, 210, 211, 211, 209, 210, 212, 211, 213, 212, 212, 213, 213, 213, 213, 212, 212, 213, 213, 213, 213, 213, 214, 214, 214, 214, 212, 211, 210, 210, 210, 210, 210, 211, 211, 211, 211, 211, 211, 211, 211, 210, 210, 215, 212, 211, 210, 210, 207, 140, 48, 155, 211, 206, 211, 206, 211, 213, 211, 211, 211, 211, 212, 209, 209, 209, 209, 212, 210, 213, 211, 214, 195, 196, 213, 191, 65, 20, 16, 13, 32, 53, 55, 39, 58, 52, 64, 64, 71, 69, 56, 41, 49, 40, 30, 16, 6, 4, 4, 14, 20, 24, 30, 26, 19, 23, 39, 45, 38, 35, 26, 15, 12, 13, 11, 6, 7, 6, 6, 3, 5, 9, 9, 7, 7, 1, 3, 7, 7, 6, 7, 7, 6, 6, 6, 5, 4, 4, 4, 3, 4, 4, 4, 4, 4, 3, 4, 5, 4, 1, 3, 7, 13, 10, 11, 11, 14, 14, 3, 4, 4, 3, 2, 2, 1, 3, 3, 3, 2, 1, 2, 2, 2, 1, 4, 5, 8, 6, 7, 3, 1, 5, 5, 4, 5, 4, 5, 9, 12, 24, 29, 38, 44, 50, 57, 53, 42, 29, 16, 8, 4, 4, 9, 26, 47, 64, 67, 65, 75, 67, 54, 61, 63, 64, 56, 66, 50, 27, 18, 36, 159, 202, 204, 204, 204, 204, 204, 204, 204, 204, 204, 205, 204, 204, 204, 205, 205, 205, 205, 204, 204, 204, 204, 204, 204, 204, 208, 210, 210, 210, 210, 209, 211, 211, 211, 211, 211, 210, 211, 211, 211, 212, 212, 211, 212, 211, 211, 212, 212, 212, 212, 212, 213, 213, 212, 212, 212, 212, 212, 212, 212, 212, 210, 210, 209, 209, 209, 210, 210, 210, 211, 211, 211, 210, 210, 210, 210, 210, 210, 213, 208, 209, 206, 194, 180, 96, 51, 154, 202, 209, 212, 212, 212, 208, 210, 210, 210, 210, 210, 209, 209, 209, 211, 209, 212, 208, 212, 192, 201, 206, 200, 84, 28, 17, 13, 10, 25, 53, 52, 66, 30, 49, 47, 50, 58, 62, 53, 46, 42, 41, 32, 16, 19, 24, 29, 32, 38, 38, 38, 36, 26, 19, 11, 13, 10, 7, 5, 6, 9, 9, 6, 8, 8, 6, 6, 4, 3, 8, 17, 19, 12, 13, 10, 8, 3, 4, 6, 6, 5, 6, 5, 5, 5, 5, 5, 4, 4, 4, 3, 4, 4, 4, 4, 4, 3, 3, 4, 1, 3, 5, 12, 17, 18, 15, 24, 22, 1, 5, 5, 3, 2, 1, 2, 2, 2, 2, 2, 3, 3, 3, 3, 2, 2, 5, 6, 8, 4, 5, 3, 1, 16, 26, 25, 26, 17, 6, 7, 8, 8, 1, 3, 5, 8, 13, 24, 35, 37, 34, 27, 28, 34, 29, 12, 7, 6, 8, 23, 46, 63, 57, 57, 61, 60, 55, 79, 51, 40, 14, 19, 85, 195, 203, 204, 204, 203, 205, 204, 204, 204, 204, 205, 204, 204, 204, 205, 205, 205, 205, 204, 204, 204, 204, 204, 204, 204, 208, 210, 210, 210, 210, 210, 212, 212, 211, 211, 211, 210, 211, 211, 212, 212, 211, 212, 211, 211, 211, 212, 212, 212, 212, 212, 212, 213, 212, 212, 212, 212, 212, 212, 212, 212, 211, 210, 210, 210, 210, 210, 210, 210, 210, 210, 210, 210, 209, 210, 208, 209, 211, 200, 134, 74, 36, 24, 24, 21, 28, 32, 41, 60, 118, 181, 208, 209, 210, 210, 210, 210, 210, 208, 208, 209, 210, 210, 210, 206, 192, 208, 205, 201, 95, 29, 17, 9, 19, 56, 38, 47, 47, 59, 32, 31, 41, 43, 52, 41, 29, 38, 46, 42, 42, 54, 60, 53, 40, 24, 17, 13, 10, 6, 6, 4, 5, 6, 7, 9, 13, 10, 7, 4, 4, 6, 6, 4, 6, 3, 2, 13, 10, 16, 17, 11, 9, 6, 3, 3, 4, 4, 3, 4, 3, 3, 4, 4, 4, 4, 4, 4, 3, 4, 4, 4, 4, 4, 3, 4, 4, 3, 3, 7, 15, 20, 19, 22, 30, 27, 1, 4, 3, 3, 3, 3, 2, 2, 2, 1, 1, 1, 1, 1, 1, 3, 4, 6, 8, 5, 5, 5, 13, 10, 22, 32, 37, 41, 36, 14, 3, 3, 5, 8, 7, 6, 6, 6, 5, 2, 7, 13, 13, 22, 42, 51, 49, 41, 37, 32, 18, 13, 10, 32, 52, 56, 57, 57, 55, 74, 63, 54, 25, 17, 35, 148, 205, 203, 205, 204, 205, 204, 204, 204, 204, 205, 204, 204, 204, 205, 205, 205, 205, 204, 204, 204, 204, 204, 204, 204, 208, 210, 210, 210, 210, 209, 211, 211, 211, 211, 211, 211, 211, 211, 211, 210, 210, 211, 211, 211, 211, 211, 211, 212, 211, 210, 210, 211, 212, 212, 213, 212, 213, 212, 212, 212, 211, 210, 210, 210, 210, 211, 211, 211, 211, 209, 209, 210, 212, 213, 214, 209, 163, 39, 24, 40, 45, 45, 45, 34, 30, 45, 51, 32, 24, 43, 108, 214, 209, 213, 210, 211, 210, 210, 210, 210, 210, 211, 206, 193, 209, 213, 208, 115, 28, 13, 7, 20, 47, 59, 64, 42, 64, 48, 52, 42, 42, 47, 39, 55, 60, 61, 55, 48, 35, 24, 14, 8, 9, 12, 11, 8, 6, 5, 3, 4, 3, 2, 5, 4, 3, 4, 5, 4, 6, 7, 6, 2, 1, 5, 6, 5, 5, 4, 4, 5, 6, 5, 4, 4, 4, 4, 5, 4, 3, 3, 3, 4, 3, 2, 3, 3, 4, 5, 4, 1, 1, 2, 4, 6, 8, 13, 10, 11, 7, 11, 19, 19, 3, 5, 6, 7, 7, 6, 5, 4, 3, 1, 1, 1, 2, 2, 2, 4, 7, 4, 4, 5, 9, 14, 21, 25, 33, 37, 33, 13, 10, 2, 3, 5, 14, 16, 14, 13, 10, 13, 10, 8, 8, 8, 7, 4, 3, 3, 7, 15, 32, 39, 43, 47, 33, 33, 36, 37, 41, 41, 44, 62, 64, 51, 40, 11, 21, 77, 207, 205, 205, 205, 204, 204, 205, 205, 204, 205, 205, 205, 204, 205, 205, 204, 204, 204, 205, 204, 203, 203, 204, 205, 208, 210, 210, 210, 210, 209, 212, 212, 212, 211, 211, 211, 211, 211, 211, 210, 210, 211, 211, 211, 211, 211, 211, 211, 211, 210, 211, 211, 211, 211, 211, 211, 211, 211, 211, 211, 210, 210, 210, 210, 211, 211, 210, 210, 210, 209, 209, 210, 211, 212, 213, 188, 37, 28, 38, 40, 41, 32, 34, 45, 43, 45, 33, 57, 54, 33, 29, 112, 208, 212, 208, 209, 209, 211, 211, 211, 211, 211, 200, 199, 203, 206, 126, 20, 17, 31, 25, 27, 54, 48, 46, 53, 61, 52, 56, 43, 51, 49, 33, 30, 20, 16, 13, 10, 9, 11, 9, 5, 6, 7, 5, 5, 5, 3, 2, 2, 2, 2, 4, 5, 4, 4, 4, 5, 3, 3, 3, 2, 2, 1, 3, 4, 4, 4, 4, 5, 5, 3, 3, 3, 4, 4, 3, 2, 3, 4, 5, 4, 4, 7, 6, 4, 3, 2, 2, 4, 4, 8, 6, 5, 5, 2, 1, 3, 8, 8, 3, 1, 2, 6, 7, 5, 4, 5, 4, 4, 4, 4, 3, 2, 2, 4, 4, 7, 7, 6, 5, 12, 14, 11, 13, 20, 21, 17, 3, 5, 5, 5, 8, 9, 13, 10, 12, 14, 11, 12, 12, 12, 7, 7, 7, 6, 6, 8, 9, 12, 15, 30, 32, 34, 45, 57, 55, 47, 48, 69, 61, 43, 21, 15, 36, 148, 202, 206, 203, 203, 204, 204, 204, 204, 204, 205, 205, 205, 206, 205, 204, 204, 204, 205, 205, 205, 205, 205, 205, 208, 210, 210, 210, 210, 209, 212, 212, 212, 211, 211, 211, 211, 211, 211, 210, 210, 211, 211, 211, 211, 211, 211, 211, 211, 210, 210, 209, 209, 209, 209, 209, 210, 210, 210, 211, 210, 209, 210, 210, 210, 210, 209, 209, 209, 209, 208, 210, 212, 212, 211, 131, 24, 34, 46, 45, 50, 56, 65, 52, 59, 56, 52, 37, 29, 48, 44, 56, 199, 212, 210, 210, 208, 212, 211, 210, 210, 209, 178, 185, 201, 128, 34, 19, 16, 45, 39, 59, 34, 56, 51, 64, 52, 44, 28, 31, 53, 21, 8, 7, 6, 7, 9, 5, 3, 4, 6, 6, 6, 4, 4, 4, 4, 4, 5, 5, 5, 3, 3, 3, 4, 4, 4, 2, 2, 2, 1, 2, 1, 1, 2, 3, 3, 4, 6, 8, 7, 4, 1, 1, 2, 2, 6, 6, 4, 4, 5, 5, 6, 6, 5, 6, 5, 4, 6, 4, 6, 7, 7, 11, 8, 3, 4, 3, 5, 5, 13, 10, 9, 7, 7, 4, 4, 3, 2, 4, 6, 5, 7, 6, 6, 5, 5, 3, 4, 6, 6, 6, 6, 5, 15, 16, 11, 14, 16, 13, 10, 3, 5, 5, 6, 8, 7, 6, 6, 6, 5, 6, 5, 5, 5, 4, 7, 9, 13, 10, 9, 11, 11, 13, 10, 9, 13, 13, 18, 36, 49, 56, 55, 59, 62, 53, 36, 12, 21, 71, 200, 204, 205, 204, 204, 203, 204, 204, 204, 205, 205, 205, 206, 205, 204, 204, 204, 204, 205, 205, 205, 205, 204, 207, 209, 209, 209, 209, 209, 211, 211, 211, 211, 211, 211, 211, 211, 211, 210, 210, 211, 211, 211, 211, 211, 211, 210, 210, 210, 211, 209, 209, 209, 209, 208, 208, 208, 209, 209, 210, 210, 210, 209, 208, 209, 209, 208, 209, 207, 206, 209, 212, 212, 211, 154, 34, 51, 52, 63, 70, 71, 71, 46, 63, 73, 64, 68, 68, 53, 49, 61, 202, 212, 210, 210, 208, 211, 211, 208, 208, 207, 202, 191, 130, 32, 14, 23, 35, 43, 43, 49, 45, 42, 64, 47, 35, 21, 22, 38, 25, 6, 11, 8, 6, 13, 10, 21, 15, 5, 4, 6, 11, 11, 7, 5, 3, 3, 5, 4, 4, 4, 5, 3, 3, 2, 1, 2, 3, 3, 2, 2, 1, 4, 6, 7, 8, 13, 10, 13, 10, 9, 6, 2, 2, 4, 3, 3, 1, 2, 5, 6, 7, 12, 12, 11, 12, 8, 5, 6, 5, 13, 10, 12, 13, 13, 10, 4, 5, 4, 4, 6, 12, 7, 6, 6, 5, 4, 3, 13, 10, 12, 12, 7, 5, 2, 2, 5, 9, 9, 8, 11, 9, 5, 9, 9, 20, 24, 17, 21, 20, 13, 10, 1, 1, 6, 6, 5, 5, 4, 6, 6, 3, 4, 4, 4, 5, 2, 3, 9, 13, 13, 12, 13, 12, 9, 13, 10, 11, 11, 11, 13, 10, 8, 4, 22, 52, 61, 57, 43, 41, 37, 37, 133, 205, 203, 202, 204, 203, 203, 204, 204, 205, 205, 205, 206, 205, 204, 204, 204, 205, 205, 207, 207, 206, 206, 209, 209, 208, 208, 208, 209, 208, 209, 209, 209, 209, 210, 209, 209, 209, 209, 209, 209, 209, 209, 209, 209, 208, 209, 210, 212, 211, 209, 209, 209, 208, 208, 209, 209, 208, 208, 209, 209, 209, 209, 209, 209, 208, 208, 209, 210, 211, 209, 208, 208, 208, 205, 94, 61, 48, 57, 60, 61, 53, 30, 35, 69, 73, 87, 61, 80, 73, 133, 210, 209, 209, 210, 210, 210, 208, 209, 210, 206, 208, 143, 35, 15, 12, 34, 44, 52, 53, 60, 47, 59, 46, 40, 25, 17, 35, 18, 6, 6, 5, 20, 19, 18, 27, 28, 18, 13, 10, 6, 6, 7, 3, 3, 6, 7, 4, 4, 3, 5, 6, 5, 4, 4, 4, 4, 4, 4, 4, 4, 3, 2, 2, 2, 8, 11, 12, 12, 12, 11, 5, 4, 2, 4, 3, 3, 9, 8, 6, 2, 8, 11, 13, 10, 11, 13, 10, 8, 8, 11, 12, 11, 12, 13, 9, 5, 3, 3, 1, 5, 6, 15, 8, 11, 13, 13, 9, 4, 13, 10, 15, 14, 20, 15, 9, 6, 6, 4, 4, 7, 9, 8, 5, 7, 7, 29, 37, 32, 35, 24, 6, 1, 4, 3, 2, 1, 5, 5, 7, 7, 7, 5, 3, 2, 1, 5, 5, 4, 4, 5, 9, 11, 11, 13, 10, 13, 10, 13, 18, 17, 4, 13, 10, 12, 17, 45, 50, 60, 50, 49, 42, 22, 48, 179, 200, 202, 203, 203, 203, 204, 203, 206, 205, 205, 205, 205, 205, 204, 205, 206, 204, 204, 206, 206, 207, 209, 209, 209, 209, 209, 209, 208, 209, 209, 209, 209, 209, 209, 209, 209, 209, 209, 209, 209, 209, 209, 209, 208, 210, 210, 211, 211, 209, 209, 209, 208, 208, 209, 209, 208, 208, 208, 208, 208, 208, 208, 209, 209, 209, 209, 210, 209, 207, 206, 208, 207, 208, 135, 55, 38, 53, 67, 74, 68, 57, 68, 74, 70, 64, 31, 84, 123, 210, 209, 209, 207, 209, 209, 208, 210, 210, 207, 210, 165, 41, 16, 12, 17, 43, 42, 51, 49, 60, 57, 53, 38, 23, 15, 38, 22, 7, 5, 4, 13, 10, 32, 30, 19, 17, 27, 33, 20, 9, 13, 10, 9, 6, 4, 5, 5, 3, 3, 4, 4, 3, 4, 3, 2, 3, 4, 4, 4, 4, 4, 4, 3, 4, 4, 11, 13, 13, 10, 7, 6, 6, 5, 8, 7, 9, 6, 4, 5, 5, 6, 5, 13, 10, 13, 15, 11, 5, 8, 14, 19, 19, 12, 12, 13, 14, 14, 14, 13, 10, 7, 9, 13, 10, 16, 14, 19, 19, 22, 17, 13, 10, 6, 15, 21, 28, 22, 13, 10, 2, 7, 7, 3, 7, 9, 8, 7, 8, 12, 29, 42, 52, 52, 37, 8, 4, 6, 5, 4, 4, 4, 5, 4, 5, 6, 5, 3, 2, 1, 3, 4, 4, 4, 5, 6, 5, 9, 16, 18, 19, 31, 36, 20, 8, 1, 13, 10, 16, 40, 46, 56, 45, 52, 36, 22, 111, 199, 201, 203, 201, 201, 202, 202, 205, 205, 206, 204, 204, 205, 206, 205, 206, 204, 204, 206, 206, 205, 209, 209, 209, 209, 209, 209, 208, 209, 209, 209, 209, 209, 209, 209, 209, 209, 209, 209, 209, 209, 209, 209, 208, 210, 210, 210, 210, 208, 208, 208, 208, 208, 207, 209, 209, 207, 208, 208, 208, 208, 208, 209, 209, 209, 209, 210, 211, 210, 208, 209, 207, 210, 119, 60, 58, 74, 72, 68, 64, 62, 69, 80, 70, 74, 62, 72, 140, 207, 208, 210, 207, 209, 209, 207, 208, 207, 207, 171, 53, 17, 16, 18, 26, 47, 43, 52, 52, 49, 59, 36, 26, 17, 38, 20, 13, 10, 5, 1, 4, 7, 21, 23, 22, 13, 11, 25, 25, 13, 13, 10, 7, 4, 4, 3, 3, 5, 4, 4, 3, 2, 4, 4, 4, 4, 4, 4, 4, 4, 4, 4, 3, 4, 4, 6, 5, 5, 5, 5, 6, 8, 13, 12, 18, 11, 9, 13, 10, 13, 10, 13, 10, 5, 2, 13, 10, 17, 19, 18, 23, 22, 23, 22, 13, 12, 14, 16, 12, 11, 7, 2, 9, 13, 10, 13, 15, 23, 21, 23, 21, 20, 16, 12, 19, 28, 20, 14, 8, 7, 7, 4, 9, 12, 8, 7, 9, 15, 12, 14, 26, 37, 42, 14, 7, 6, 8, 13, 10, 7, 2, 3, 5, 6, 6, 6, 4, 3, 2, 3, 3, 4, 5, 3, 5, 6, 7, 16, 24, 31, 35, 36, 33, 28, 8, 13, 10, 9, 25, 30, 61, 54, 50, 50, 13, 43, 165, 203, 202, 202, 202, 203, 202, 205, 204, 205, 205, 205, 205, 205, 206, 206, 204, 204, 206, 206, 206, 208, 208, 208, 208, 209, 209, 209, 209, 209, 209, 209, 210, 209, 209, 210, 208, 208, 210, 212, 210, 211, 210, 209, 207, 208, 208, 208, 208, 208, 208, 208, 208, 208, 207, 207, 208, 208, 208, 208, 208, 208, 208, 209, 209, 209, 210, 210, 208, 206, 209, 210, 211, 111, 63, 58, 61, 59, 54, 57, 53, 58, 56, 59, 64, 73, 84, 153, 203, 208, 210, 206, 210, 209, 205, 206, 209, 196, 57, 23, 11, 20, 48, 40, 44, 38, 49, 46, 38, 39, 29, 14, 37, 28, 5, 5, 6, 5, 4, 4, 9, 13, 10, 17, 15, 11, 12, 23, 17, 9, 11, 9, 6, 5, 5, 4, 2, 3, 3, 3, 3, 4, 4, 4, 4, 4, 5, 4, 4, 5, 4, 6, 4, 5, 3, 3, 4, 5, 4, 5, 11, 11, 15, 12, 9, 13, 13, 14, 15, 17, 19, 11, 20, 16, 17, 20, 15, 14, 8, 6, 7, 13, 13, 10, 12, 13, 14, 22, 13, 8, 11, 9, 14, 18, 23, 25, 28, 29, 23, 17, 22, 18, 19, 15, 12, 6, 12, 12, 14, 7, 12, 13, 12, 13, 13, 10, 13, 11, 3, 4, 4, 7, 7, 7, 2, 5, 6, 6, 8, 7, 6, 5, 2, 3, 5, 6, 5, 5, 5, 8, 7, 13, 10, 27, 29, 19, 20, 35, 28, 7, 13, 10, 13, 10, 9, 30, 38, 61, 52, 60, 21, 25, 86, 202, 199, 201, 204, 201, 203, 204, 204, 205, 205, 204, 204, 205, 206, 205, 205, 205, 205, 205, 205, 207, 207, 207, 207, 208, 209, 209, 209, 209, 209, 209, 209, 209, 208, 209, 208, 208, 209, 212, 211, 211, 211, 210, 208, 208, 209, 208, 208, 208, 207, 208, 208, 208, 207, 207, 207, 208, 208, 208, 208, 208, 206, 207, 208, 208, 209, 209, 207, 207, 209, 208, 205, 84, 56, 55, 65, 64, 63, 65, 66, 61, 55, 51, 54, 55, 79, 165, 205, 207, 210, 206, 209, 208, 202, 210, 187, 59, 23, 15, 14, 31, 56, 58, 54, 44, 41, 37, 48, 35, 15, 24, 28, 7, 8, 13, 10, 6, 6, 6, 6, 4, 4, 9, 16, 18, 19, 25, 23, 9, 8, 13, 10, 7, 7, 7, 5, 4, 3, 1, 1, 5, 3, 5, 9, 8, 8, 8, 3, 1, 2, 1, 3, 5, 6, 6, 2, 2, 5, 3, 1, 6, 12, 21, 17, 15, 17, 18, 18, 16, 15, 12, 3, 8, 9, 13, 10, 11, 13, 10, 16, 13, 14, 17, 18, 17, 17, 16, 25, 31, 24, 26, 28, 26, 23, 14, 17, 20, 24, 20, 21, 15, 24, 26, 26, 23, 25, 26, 23, 21, 11, 5, 4, 2, 8, 13, 6, 6, 6, 4, 5, 4, 3, 9, 11, 7, 2, 3, 6, 8, 6, 7, 7, 4, 1, 3, 6, 9, 11, 11, 13, 10, 7, 14, 26, 21, 12, 14, 21, 15, 15, 17, 12, 14, 16, 25, 53, 53, 56, 36, 18, 38, 154, 201, 200, 202, 204, 203, 203, 204, 205, 205, 203, 203, 203, 204, 204, 203, 203, 202, 201, 202, 207, 207, 207, 206, 207, 208, 208, 208, 208, 209, 209, 209, 208, 207, 208, 208, 207, 209, 211, 210, 210, 210, 209, 207, 208, 208, 208, 208, 207, 207, 207, 208, 207, 207, 207, 207, 207, 207, 207, 207, 207, 207, 207, 207, 207, 206, 207, 208, 208, 208, 208, 202, 78, 57, 57, 58, 58, 63, 65, 63, 62, 55, 54, 50, 46, 65, 168, 206, 207, 208, 207, 207, 207, 205, 199, 78, 27, 18, 9, 35, 41, 48, 49, 62, 48, 38, 47, 50, 14, 32, 24, 6, 3, 5, 6, 9, 6, 3, 5, 5, 2, 7, 19, 24, 33, 37, 37, 15, 5, 11, 9, 8, 9, 9, 7, 2, 3, 4, 5, 7, 9, 7, 8, 13, 10, 5, 3, 4, 3, 4, 5, 7, 7, 6, 5, 4, 5, 11, 17, 17, 16, 16, 17, 18, 14, 15, 13, 4, 7, 4, 6, 21, 24, 23, 26, 26, 20, 24, 20, 15, 17, 20, 22, 36, 29, 28, 30, 28, 29, 30, 31, 41, 37, 32, 21, 9, 2, 17, 21, 26, 27, 40, 39, 26, 23, 15, 13, 10, 7, 6, 2, 4, 6, 17, 14, 9, 9, 3, 4, 14, 17, 13, 11, 8, 5, 3, 6, 4, 6, 9, 5, 5, 8, 9, 11, 8, 8, 13, 10, 29, 31, 20, 12, 13, 9, 8, 9, 8, 3, 11, 21, 29, 36, 59, 57, 46, 26, 26, 71, 206, 200, 200, 203, 203, 203, 203, 204, 205, 203, 203, 203, 203, 203, 203, 202, 202, 201, 202, 207, 208, 208, 206, 206, 207, 207, 207, 207, 209, 209, 208, 208, 207, 208, 208, 208, 209, 211, 209, 209, 209, 208, 206, 206, 207, 206, 207, 207, 207, 207, 207, 207, 207, 207, 207, 207, 207, 207, 207, 207, 206, 207, 208, 208, 208, 209, 209, 208, 208, 206, 190, 75, 56, 57, 53, 64, 70, 62, 58, 51, 52, 69, 56, 55, 74, 175, 203, 208, 208, 208, 205, 204, 202, 104, 28, 15, 13, 31, 48, 46, 41, 53, 55, 43, 41, 49, 20, 34, 32, 9, 2, 5, 8, 11, 9, 6, 5, 5, 6, 4, 1, 15, 31, 45, 46, 41, 29, 13, 10, 13, 10, 9, 13, 10, 12, 12, 6, 2, 3, 2, 4, 7, 11, 14, 16, 12, 7, 6, 20, 32, 21, 13, 10, 6, 9, 9, 13, 10, 11, 7, 5, 15, 15, 15, 8, 5, 5, 7, 13, 19, 21, 20, 17, 9, 17, 20, 20, 21, 23, 22, 20, 18, 19, 20, 19, 19, 19, 29, 36, 37, 36, 29, 30, 34, 29, 34, 31, 33, 29, 20, 15, 21, 22, 31, 20, 19, 22, 23, 22, 25, 22, 15, 9, 14, 16, 13, 22, 25, 24, 19, 17, 6, 9, 17, 22, 18, 16, 14, 5, 11, 7, 5, 11, 8, 8, 13, 10, 13, 10, 13, 10, 13, 10, 13, 10, 24, 44, 37, 25, 19, 11, 3, 4, 7, 5, 1, 6, 19, 16, 28, 53, 58, 61, 36, 17, 32, 130, 201, 202, 203, 203, 203, 203, 203, 204, 203, 203, 202, 202, 202, 202, 202, 202, 202, 202, 206, 206, 207, 207, 206, 206, 207, 207, 207, 207, 207, 207, 207, 208, 209, 209, 209, 209, 211, 209, 209, 209, 208, 207, 207, 206, 206, 206, 206, 207, 207, 206, 207, 207, 207, 207, 206, 207, 208, 207, 206, 207, 207, 207, 207, 208, 208, 206, 207, 206, 202, 178, 69, 66, 68, 68, 64, 58, 54, 50, 47, 49, 60, 64, 54, 68, 180, 203, 210, 207, 205, 205, 205, 109, 30, 13, 5, 31, 49, 49, 65, 39, 63, 54, 39, 40, 24, 32, 36, 12, 5, 7, 6, 6, 6, 6, 4, 4, 3, 5, 1, 2, 13, 35, 36, 19, 8, 18, 15, 8, 9, 11, 15, 17, 13, 10, 6, 8, 11, 12, 8, 5, 4, 11, 14, 15, 15, 28, 52, 29, 15, 11, 12, 12, 11, 11, 5, 1, 11, 14, 18, 18, 16, 18, 16, 21, 25, 29, 23, 27, 30, 24, 20, 21, 22, 23, 22, 22, 18, 16, 17, 18, 23, 23, 32, 36, 34, 32, 28, 28, 37, 39, 36, 32, 27, 30, 25, 27, 32, 32, 38, 40, 43, 37, 24, 15, 21, 19, 21, 13, 14, 20, 27, 34, 24, 18, 26, 29, 24, 15, 6, 20, 23, 16, 14, 6, 4, 8, 5, 13, 12, 12, 11, 13, 10, 11, 14, 13, 10, 24, 48, 46, 37, 28, 2, 3, 7, 6, 3, 3, 5, 7, 13, 10, 27, 49, 64, 56, 42, 22, 18, 44, 183, 201, 201, 203, 204, 203, 202, 202, 203, 203, 202, 202, 202, 202, 203, 203, 201, 202, 205, 206, 207, 207, 206, 206, 207, 207, 207, 207, 207, 207, 207, 207, 209, 208, 208, 209, 210, 209, 210, 210, 209, 207, 206, 206, 207, 206, 206, 206, 206, 206, 207, 207, 207, 207, 206, 207, 207, 207, 206, 206, 207, 207, 207, 207, 208, 205, 206, 205, 201, 171, 74, 75, 71, 68, 63, 58, 40, 41, 54, 60, 55, 53, 55, 83, 189, 206, 209, 208, 208, 205, 135, 33, 19, 11, 28, 51, 40, 43, 37, 47, 35, 37, 36, 31, 34, 38, 11, 6, 9, 6, 6, 7, 5, 4, 3, 4, 3, 5, 2, 5, 3, 9, 8, 13, 8, 5, 7, 13, 10, 14, 16, 16, 18, 13, 10, 6, 9, 18, 16, 15, 17, 15, 8, 11, 12, 14, 40, 56, 27, 8, 3, 7, 11, 11, 12, 9, 13, 10, 22, 25, 20, 20, 21, 20, 17, 20, 21, 24, 26, 29, 29, 24, 20, 23, 23, 23, 22, 21, 25, 30, 31, 33, 32, 28, 30, 39, 35, 30, 29, 34, 32, 35, 40, 34, 30, 33, 30, 32, 38, 43, 41, 34, 36, 40, 37, 30, 33, 37, 32, 12, 8, 21, 41, 33, 21, 22, 26, 31, 33, 28, 22, 24, 25, 18, 19, 19, 16, 13, 7, 14, 16, 14, 15, 14, 14, 13, 12, 12, 13, 26, 43, 27, 4, 5, 9, 9, 7, 7, 7, 6, 12, 20, 43, 50, 59, 48, 40, 16, 25, 113, 197, 205, 201, 203, 203, 203, 202, 202, 202, 202, 202, 202, 202, 203, 203, 201, 202, 206, 206, 207, 207, 206, 206, 207, 207, 207, 207, 207, 207, 207, 207, 208, 208, 208, 208, 209, 208, 208, 209, 208, 207, 206, 205, 207, 206, 207, 207, 206, 206, 207, 207, 207, 207, 207, 205, 204, 205, 207, 206, 206, 207, 207, 208, 209, 207, 207, 206, 201, 168, 81, 73, 72, 69, 61, 55, 63, 73, 76, 64, 56, 49, 47, 88, 194, 202, 208, 211, 207, 153, 38, 13, 11, 22, 44, 46, 52, 37, 63, 50, 57, 40, 33, 43, 40, 16, 8, 7, 7, 5, 5, 6, 6, 5, 4, 5, 3, 4, 5, 6, 4, 1, 4, 3, 5, 4, 3, 2, 13, 10, 16, 17, 17, 18, 21, 26, 24, 18, 14, 14, 7, 5, 13, 10, 13, 10, 28, 34, 22, 16, 17, 17, 17, 22, 22, 17, 18, 22, 21, 19, 17, 20, 23, 19, 19, 21, 20, 24, 29, 29, 27, 28, 29, 28, 31, 35, 32, 33, 34, 32, 26, 24, 28, 28, 38, 51, 49, 49, 40, 30, 34, 33, 30, 33, 34, 31, 30, 29, 36, 37, 34, 35, 38, 37, 36, 36, 35, 40, 26, 20, 37, 49, 48, 18, 11, 13, 10, 9, 38, 35, 26, 24, 19, 31, 31, 30, 24, 21, 12, 15, 19, 17, 14, 9, 8, 6, 3, 2, 6, 7, 12, 11, 3, 7, 12, 13, 10, 9, 8, 7, 8, 18, 21, 29, 41, 57, 54, 54, 27, 18, 46, 173, 199, 203, 202, 201, 201, 201, 202, 202, 202, 202, 202, 202, 203, 203, 201, 202, 7, 13, 10, 8, 7, 5, 5, 4, 8, 9, 8, 19, 27, 37, 56, 54, 78, 50, 30, 57, 42, 48, 37, 38, 71, 47, 35, 61, 23, 21, 50, 34, 37, 63, 28, 12, 13, 10, 14, 11, 16, 14, 11, 11, 16, 28, 53, 66, 87, 75, 41, 108, 140, 138, 177, 112, 144, 180, 135, 170, 102, 80, 116, 99, 125, 151, 168, 165, 108, 161, 168, 175, 99, 136, 178, 154, 168, 152, 150, 119, 49, 107, 121, 85, 64, 45, 71, 96, 72, 48, 34, 29, 35, 33, 29, 25, 104, 154, 149, 179, 193, 197, 198, 199, 199, 199, 199, 200, 200, 199, 199, 199, 199, 199, 199, 199, 199, 198, 198, 198, 198, 198, 198, 198, 198, 198, 198, 198, 198, 198, 199, 198, 198, 200, 200, 200, 200, 201, 200, 200, 200, 199, 199, 200, 200, 199, 198, 198, 198, 198, 198, 198, 199, 199, 199, 199, 199, 198, 198, 198, 199, 201, 199, 198, 198, 199, 198, 198, 198, 199, 200, 199, 199, 200, 201, 200, 199, 198, 198, 199, 199, 199, 199, 198, 199, 199, 199, 199, 199, 199, 198, 198, 198, 198, 198, 198, 198, 198, 198, 198, 198, 198, 198, 198, 198, 198, 198, 199, 198, 197, 199, 200, 199, 199, 199, 198, 198, 199, 199, 198, 198, 198, 198, 199, 199, 199, 198, 198, 198, 197, 197, 197, 197, 195, 195, 195, 195, 195, 195, 194, 194, 193, 193, 192, 192, 191, 192, 193, 193, 192, 193, 193, 193, 193, 193, 194, 194, 194, 8, 6, 15, 3, 8, 8, 15, 7, 13, 25, 13, 31, 62, 40, 77, 70, 83, 36, 58, 104, 51, 24, 58, 62, 73, 50, 44, 53, 31, 45, 49, 80, 66, 33, 15, 14, 13, 13, 10, 14, 25, 16, 13, 10, 19, 24, 43, 56, 41, 84, 43, 65, 76, 88, 68, 134, 165, 127, 139, 158, 122, 48, 156, 145, 123, 125, 128, 153, 137, 137, 187, 189, 171, 88, 147, 162, 172, 147, 103, 76, 102, 24, 38, 47, 78, 83, 91, 63, 69, 68, 40, 32, 57, 54, 33, 72, 78, 150, 195, 177, 197, 200, 198, 199, 199, 199, 199, 200, 200, 199, 199, 199, 199, 199, 199, 199, 199, 198, 198, 198, 198, 198, 198, 198, 198, 198, 198, 198, 198, 199, 199, 199, 199, 200, 200, 200, 200, 201, 200, 200, 200, 199, 200, 200, 200, 199, 198, 198, 199, 199, 199, 199, 199, 199, 199, 199, 199, 198, 198, 198, 199, 200, 199, 198, 198, 199, 198, 198, 198, 199, 200, 199, 199, 200, 200, 200, 199, 199, 198, 197, 198, 199, 200, 199, 199, 199, 199, 199, 199, 199, 198, 198, 198, 198, 198, 198, 198, 198, 198, 198, 198, 198, 198, 198, 198, 198, 198, 198, 199, 198, 198, 199, 199, 199, 199, 198, 198, 199, 198, 198, 198, 198, 198, 199, 199, 199, 197, 198, 199, 198, 197, 197, 196, 196, 195, 195, 195, 195, 195, 194, 194, 193, 193, 192, 192, 192, 192, 193, 193, 193, 193, 194, 194, 194, 194, 194, 194, 194, 14, 12, 7, 6, 4, 13, 10, 18, 23, 21, 30, 35, 21, 45, 66, 70, 68, 70, 87, 64, 92, 96, 48, 69, 65, 75, 74, 46, 35, 32, 63, 41, 43, 86, 44, 28, 15, 15, 13, 10, 9, 20, 17, 16, 19, 17, 29, 43, 53, 38, 29, 85, 104, 58, 83, 80, 44, 81, 103, 103, 110, 75, 124, 120, 138, 127, 120, 68, 125, 173, 187, 180, 149, 134, 131, 150, 186, 128, 114, 90, 118, 95, 67, 52, 66, 81, 119, 115, 91, 96, 109, 78, 83, 53, 73, 141, 107, 139, 180, 197, 198, 197, 198, 199, 199, 199, 199, 200, 200, 199, 199, 199, 199, 199, 199, 199, 199, 198, 198, 198, 198, 198, 198, 198, 198, 198, 198, 198, 198, 199, 200, 200, 199, 199, 201, 200, 200, 200, 200, 200, 199, 198, 199, 200, 200, 200, 199, 198, 198, 198, 198, 198, 199, 199, 199, 199, 199, 199, 198, 199, 199, 199, 199, 199, 199, 199, 198, 198, 198, 199, 200, 199, 198, 200, 199, 200, 200, 200, 199, 198, 197, 199, 200, 200, 199, 199, 199, 199, 199, 199, 198, 198, 198, 198, 198, 198, 198, 198, 198, 198, 198, 198, 198, 198, 198, 198, 198, 199, 199, 198, 197, 198, 199, 199, 199, 199, 198, 198, 197, 198, 198, 198, 198, 199, 199, 199, 198, 198, 198, 196, 196, 197, 196, 196, 195, 195, 195, 195, 195, 194, 194, 193, 192, 192, 192, 193, 193, 192, 193, 193, 193, 194, 194, 194, 195, 195, 195, 194, 9, 8, 6, 8, 8, 8, 12, 11, 33, 34, 59, 50, 58, 88, 135, 104, 87, 85, 114, 104, 107, 104, 53, 79, 108, 90, 23, 24, 21, 28, 25, 48, 32, 47, 47, 23, 38, 16, 13, 14, 20, 21, 26, 22, 41, 55, 89, 38, 24, 73, 78, 89, 31, 43, 28, 28, 66, 97, 46, 49, 48, 68, 78, 103, 68, 103, 121, 188, 112, 127, 132, 89, 122, 86, 71, 89, 97, 117, 152, 148, 75, 79, 104, 70, 102, 108, 119, 121, 121, 143, 78, 94, 95, 156, 129, 153, 161, 198, 194, 196, 198, 199, 198, 198, 199, 199, 199, 199, 199, 198, 199, 200, 200, 200, 200, 199, 199, 198, 199, 199, 199, 199, 199, 199, 199, 199, 199, 199, 201, 201, 199, 199, 201, 201, 201, 200, 200, 199, 198, 199, 199, 198, 199, 199, 199, 198, 198, 198, 198, 198, 199, 199, 199, 199, 199, 199, 199, 199, 199, 199, 199, 199, 199, 199, 198, 198, 198, 199, 199, 200, 199, 199, 199, 200, 200, 200, 199, 198, 198, 199, 199, 200, 199, 199, 199, 199, 199, 199, 198, 198, 198, 198, 198, 198, 198, 198, 198, 198, 198, 198, 198, 198, 199, 198, 198, 199, 198, 198, 197, 199, 199, 199, 199, 198, 198, 198, 198, 198, 198, 199, 199, 199, 199, 199, 198, 198, 198, 197, 195, 195, 197, 196, 196, 196, 196, 196, 196, 195, 194, 193, 193, 193, 193, 193, 193, 193, 193, 193, 193, 194, 194, 194, 194, 195, 195, 195, 5, 6, 12, 8, 16, 9, 22, 42, 64, 71, 86, 65, 42, 86, 164, 129, 153, 130, 102, 78, 118, 85, 72, 49, 77, 75, 27, 37, 38, 52, 65, 67, 54, 49, 19, 31, 48, 31, 12, 25, 36, 31, 32, 74, 49, 52, 52, 52, 18, 21, 60, 80, 25, 32, 40, 38, 90, 108, 92, 71, 116, 91, 94, 82, 50, 38, 53, 48, 13, 43, 124, 123, 64, 108, 77, 75, 57, 124, 152, 150, 116, 69, 134, 152, 68, 141, 155, 171, 164, 150, 129, 137, 116, 184, 183, 155, 186, 195, 199, 198, 198, 199, 198, 198, 199, 199, 199, 199, 199, 199, 200, 200, 201, 201, 200, 199, 199, 198, 199, 200, 200, 200, 200, 200, 200, 200, 200, 200, 200, 201, 199, 200, 201, 201, 200, 200, 200, 199, 198, 199, 199, 198, 199, 199, 199, 199, 198, 198, 198, 198, 199, 199, 199, 199, 199, 199, 199, 199, 199, 199, 199, 199, 199, 199, 198, 197, 197, 198, 199, 200, 199, 199, 199, 198, 200, 201, 199, 198, 199, 199, 199, 199, 199, 199, 199, 199, 199, 199, 199, 198, 198, 198, 198, 198, 198, 198, 198, 198, 198, 198, 198, 198, 199, 198, 198, 199, 198, 198, 198, 198, 198, 198, 198, 198, 198, 198, 198, 198, 199, 199, 199, 199, 199, 199, 198, 198, 198, 197, 196, 196, 196, 196, 196, 196, 196, 196, 196, 195, 194, 194, 194, 194, 194, 194, 194, 194, 194, 193, 194, 195, 194, 195, 195, 195, 195, 195, 9, 13, 10, 4, 8, 31, 22, 19, 56, 88, 103, 156, 150, 131, 121, 85, 88, 87, 87, 87, 104, 96, 77, 79, 82, 87, 43, 20, 27, 30, 82, 102, 66, 56, 67, 59, 37, 23, 19, 35, 21, 76, 83, 43, 71, 67, 43, 39, 26, 20, 24, 22, 25, 30, 15, 17, 62, 80, 78, 67, 125, 122, 117, 79, 94, 50, 33, 31, 51, 14, 27, 22, 61, 33, 29, 51, 31, 50, 76, 83, 112, 114, 97, 111, 180, 142, 170, 186, 189, 177, 187, 191, 196, 183, 186, 194, 197, 197, 194, 198, 199, 198, 199, 199, 198, 199, 199, 199, 199, 199, 199, 200, 201, 201, 201, 200, 199, 199, 199, 200, 200, 200, 200, 200, 200, 200, 200, 200, 199, 200, 201, 199, 200, 200, 200, 200, 200, 200, 199, 198, 199, 199, 199, 199, 199, 199, 198, 198, 198, 198, 198, 198, 198, 198, 199, 199, 199, 199, 199, 199, 199, 199, 199, 199, 199, 199, 199, 199, 199, 200, 201, 200, 200, 200, 198, 199, 199, 199, 199, 199, 199, 199, 198, 199, 199, 199, 199, 199, 199, 199, 199, 198, 199, 198, 198, 198, 199, 198, 198, 198, 198, 198, 198, 199, 198, 198, 199, 198, 198, 198, 198, 198, 198, 198, 198, 198, 198, 198, 197, 198, 199, 199, 199, 199, 199, 198, 198, 198, 196, 196, 197, 195, 196, 196, 196, 196, 196, 196, 196, 195, 195, 195, 194, 194, 194, 194, 194, 195, 194, 194, 195, 195, 195, 195, 196, 196, 196, 13, 10, 15, 9, 9, 8, 18, 56, 55, 80, 97, 97, 145, 165, 134, 160, 88, 137, 158, 121, 133, 137, 112, 110, 102, 49, 24, 11, 25, 63, 71, 67, 41, 69, 66, 46, 25, 42, 28, 31, 33, 61, 86, 85, 102, 83, 69, 25, 40, 27, 38, 32, 38, 51, 39, 22, 30, 101, 141, 89, 73, 140, 125, 92, 79, 26, 21, 18, 19, 19, 25, 14, 49, 57, 34, 58, 40, 40, 47, 46, 84, 124, 132, 139, 149, 185, 183, 193, 197, 193, 194, 192, 194, 198, 194, 193, 195, 192, 197, 198, 198, 199, 200, 199, 199, 200, 199, 199, 199, 199, 198, 199, 200, 200, 200, 200, 199, 200, 199, 200, 200, 200, 200, 200, 200, 200, 200, 200, 199, 200, 201, 200, 200, 200, 200, 200, 200, 200, 199, 198, 199, 199, 199, 199, 199, 199, 198, 198, 198, 198, 198, 197, 198, 198, 199, 199, 199, 199, 199, 199, 199, 199, 199, 199, 199, 199, 199, 199, 199, 199, 199, 199, 198, 198, 200, 199, 197, 198, 198, 198, 199, 199, 200, 199, 199, 199, 199, 199, 199, 199, 199, 199, 200, 198, 198, 198, 199, 198, 198, 198, 198, 198, 198, 199, 198, 198, 199, 198, 198, 198, 198, 198, 198, 198, 198, 198, 198, 198, 197, 198, 199, 199, 199, 199, 199, 198, 198, 198, 197, 196, 196, 196, 196, 196, 196, 196, 196, 196, 196, 195, 195, 196, 195, 195, 195, 195, 195, 196, 195, 195, 196, 196, 196, 196, 196, 196, 196, 13, 10, 23, 12, 19, 13, 24, 21, 50, 82, 125, 154, 147, 165, 147, 160, 180, 73, 128, 167, 166, 145, 138, 94, 59, 30, 19, 24, 28, 13, 12, 21, 20, 24, 42, 43, 60, 94, 53, 41, 86, 56, 71, 117, 82, 100, 68, 60, 39, 48, 45, 60, 100, 116, 96, 55, 53, 43, 47, 91, 80, 72, 112, 42, 47, 51, 21, 19, 26, 18, 15, 16, 19, 42, 22, 53, 63, 61, 64, 56, 91, 34, 29, 38, 83, 126, 171, 163, 146, 148, 177, 190, 196, 194, 194, 194, 195, 197, 197, 197, 197, 199, 199, 199, 199, 199, 199, 199, 199, 199, 199, 199, 199, 199, 200, 200, 200, 200, 200, 200, 200, 200, 200, 200, 201, 201, 201, 201, 200, 200, 200, 200, 200, 200, 200, 200, 200, 199, 199, 198, 198, 197, 197, 198, 200, 200, 199, 199, 199, 198, 198, 199, 199, 198, 197, 197, 199, 199, 199, 199, 199, 198, 198, 199, 200, 199, 199, 199, 198, 198, 199, 199, 199, 199, 199, 199, 199, 199, 200, 200, 199, 199, 199, 200, 200, 200, 200, 200, 200, 200, 200, 200, 200, 200, 200, 200, 199, 198, 199, 198, 198, 198, 198, 198, 198, 198, 198, 198, 198, 198, 198, 198, 198, 198, 198, 198, 198, 198, 197, 197, 197, 197, 198, 198, 198, 198, 197, 197, 196, 196, 196, 196, 196, 196, 196, 196, 196, 196, 195, 196, 196, 196, 196, 196, 196, 196, 196, 196, 196, 196, 197, 196, 196, 196, 196, 195, 196, 23, 9, 21, 35, 27, 23, 81, 66, 44, 62, 136, 166, 178, 162, 121, 147, 132, 92, 152, 167, 177, 147, 86, 46, 50, 59, 35, 14, 12, 29, 44, 33, 27, 47, 83, 78, 100, 111, 66, 97, 84, 41, 102, 54, 57, 83, 74, 60, 44, 58, 106, 105, 133, 103, 101, 61, 50, 43, 92, 143, 104, 89, 77, 36, 40, 58, 30, 46, 36, 22, 15, 27, 72, 24, 24, 49, 60, 65, 73, 36, 51, 99, 93, 76, 56, 96, 122, 137, 147, 155, 178, 195, 194, 194, 194, 194, 195, 196, 196, 196, 197, 197, 198, 199, 199, 199, 199, 199, 199, 199, 199, 199, 199, 200, 200, 200, 200, 200, 199, 200, 201, 200, 199, 200, 200, 200, 200, 200, 200, 200, 200, 200, 200, 200, 201, 200, 199, 198, 198, 198, 199, 198, 199, 199, 200, 200, 200, 199, 199, 199, 199, 199, 198, 198, 198, 198, 198, 198, 198, 198, 197, 197, 198, 198, 198, 199, 199, 198, 198, 199, 199, 199, 199, 199, 199, 199, 199, 200, 200, 199, 199, 199, 200, 200, 200, 200, 200, 200, 200, 200, 200, 198, 198, 197, 197, 197, 198, 199, 198, 198, 198, 198, 198, 198, 198, 198, 198, 198, 198, 198, 198, 198, 198, 198, 198, 198, 198, 198, 197, 197, 197, 197, 197, 197, 197, 197, 197, 196, 196, 196, 196, 196, 196, 196, 196, 196, 196, 196, 196, 196, 196, 196, 196, 196, 196, 196, 197, 197, 197, 197, 196, 196, 196, 196, 196, 196, 62, 40, 6, 51, 37, 39, 74, 124, 140, 118, 127, 101, 140, 157, 151, 84, 102, 156, 63, 133, 109, 110, 115, 56, 51, 46, 66, 36, 39, 47, 38, 37, 59, 69, 112, 110, 141, 158, 75, 74, 49, 44, 59, 97, 68, 79, 57, 52, 64, 80, 152, 136, 158, 124, 106, 96, 108, 118, 99, 66, 63, 84, 143, 46, 45, 77, 36, 62, 52, 41, 32, 63, 41, 28, 36, 66, 65, 60, 34, 34, 72, 33, 76, 105, 92, 135, 129, 122, 153, 180, 192, 191, 193, 194, 194, 194, 193, 194, 195, 195, 196, 197, 197, 198, 198, 199, 199, 199, 199, 199, 199, 199, 199, 200, 200, 200, 200, 200, 200, 200, 200, 200, 200, 199, 199, 199, 199, 200, 200, 200, 200, 200, 200, 200, 201, 199, 200, 202, 199, 198, 199, 199, 199, 199, 200, 200, 201, 200, 200, 200, 200, 200, 199, 198, 198, 198, 198, 198, 198, 198, 198, 198, 198, 198, 197, 198, 198, 198, 198, 199, 199, 199, 199, 200, 199, 199, 199, 199, 200, 199, 199, 199, 200, 200, 200, 200, 200, 200, 200, 200, 200, 200, 199, 198, 198, 198, 199, 199, 198, 198, 198, 198, 198, 198, 198, 198, 198, 198, 198, 198, 198, 198, 198, 198, 198, 198, 198, 198, 197, 197, 197, 197, 197, 197, 197, 197, 197, 197, 196, 196, 196, 196, 196, 196, 196, 196, 196, 196, 196, 196, 196, 196, 196, 196, 196, 196, 198, 198, 198, 196, 196, 196, 196, 196, 196, 196, 69, 29, 13, 6, 21, 76, 103, 105, 122, 132, 140, 159, 118, 81, 48, 108, 104, 82, 38, 38, 117, 151, 160, 104, 106, 41, 94, 89, 47, 72, 56, 49, 30, 90, 75, 119, 147, 93, 127, 57, 63, 72, 61, 74, 68, 30, 26, 90, 116, 90, 174, 164, 170, 121, 105, 159, 132, 174, 115, 98, 69, 98, 122, 59, 126, 82, 47, 64, 53, 94, 64, 47, 34, 80, 78, 68, 68, 49, 58, 75, 55, 83, 59, 159, 131, 141, 167, 158, 185, 189, 191, 193, 193, 194, 193, 193, 193, 195, 195, 194, 196, 196, 196, 197, 197, 198, 198, 199, 199, 199, 199, 199, 200, 201, 200, 200, 200, 200, 201, 200, 200, 200, 200, 200, 200, 200, 201, 201, 201, 200, 200, 199, 199, 198, 201, 162, 189, 202, 194, 204, 198, 199, 203, 198, 200, 198, 200, 200, 200, 200, 200, 199, 199, 198, 197, 197, 198, 198, 197, 198, 198, 198, 198, 198, 198, 198, 198, 198, 198, 199, 199, 199, 199, 198, 199, 199, 199, 199, 200, 200, 199, 198, 199, 199, 199, 199, 199, 200, 200, 200, 199, 197, 199, 199, 198, 198, 199, 198, 198, 198, 198, 198, 198, 198, 198, 197, 197, 197, 198, 198, 198, 198, 198, 198, 198, 198, 198, 198, 197, 197, 197, 197, 197, 198, 197, 196, 197, 196, 195, 196, 196, 195, 195, 195, 196, 196, 197, 196, 196, 196, 196, 195, 196, 196, 196, 195, 198, 198, 198, 196, 196, 196, 196, 195, 195, 195, 14, 23, 28, 30, 14, 21, 57, 97, 124, 112, 71, 77, 90, 69, 33, 77, 46, 12, 47, 23, 31, 35, 48, 41, 35, 30, 40, 61, 63, 43, 76, 108, 46, 46, 56, 85, 78, 74, 74, 32, 72, 78, 83, 80, 35, 30, 49, 66, 40, 69, 147, 144, 153, 108, 151, 137, 148, 141, 128, 112, 112, 140, 99, 74, 166, 95, 41, 84, 64, 60, 55, 45, 55, 118, 68, 101, 61, 77, 98, 120, 91, 127, 83, 93, 158, 156, 145, 171, 188, 194, 193, 193, 193, 193, 192, 193, 193, 193, 193, 194, 195, 195, 197, 198, 198, 198, 198, 199, 199, 199, 199, 200, 200, 200, 200, 200, 200, 200, 200, 200, 200, 200, 201, 200, 200, 200, 200, 200, 201, 201, 201, 199, 201, 199, 199, 119, 155, 200, 199, 197, 199, 198, 198, 200, 199, 199, 199, 199, 199, 199, 199, 200, 201, 200, 199, 199, 199, 199, 197, 198, 198, 198, 198, 198, 198, 198, 198, 198, 198, 198, 198, 198, 198, 199, 199, 199, 198, 198, 199, 198, 198, 198, 198, 198, 198, 198, 198, 198, 198, 198, 198, 197, 199, 199, 198, 198, 198, 198, 198, 199, 198, 198, 198, 198, 198, 198, 198, 198, 198, 198, 198, 198, 198, 198, 198, 198, 198, 198, 197, 197, 197, 197, 197, 197, 196, 195, 196, 196, 196, 197, 197, 196, 196, 196, 196, 196, 196, 196, 196, 196, 197, 198, 198, 198, 198, 198, 197, 197, 197, 198, 198, 199, 199, 198, 198, 198, 38, 12, 35, 28, 61, 50, 36, 32, 84, 116, 113, 69, 57, 23, 27, 58, 37, 34, 23, 22, 7, 45, 77, 109, 121, 77, 48, 81, 94, 41, 99, 116, 114, 42, 44, 23, 31, 37, 25, 21, 64, 62, 82, 22, 23, 25, 27, 31, 50, 68, 36, 60, 143, 147, 121, 97, 102, 70, 61, 38, 34, 43, 63, 82, 46, 48, 55, 46, 100, 71, 56, 65, 91, 95, 88, 52, 74, 92, 116, 105, 129, 153, 122, 109, 135, 169, 191, 168, 148, 186, 192, 194, 193, 192, 192, 193, 194, 195, 195, 196, 195, 196, 197, 198, 198, 198, 198, 198, 199, 199, 200, 200, 200, 199, 200, 200, 200, 200, 200, 200, 200, 200, 199, 200, 200, 200, 200, 200, 200, 201, 200, 200, 203, 199, 199, 190, 92, 104, 165, 195, 200, 175, 203, 197, 201, 198, 201, 201, 201, 201, 200, 199, 199, 199, 200, 198, 199, 198, 197, 198, 198, 198, 198, 198, 198, 198, 198, 198, 198, 198, 198, 198, 198, 198, 198, 199, 199, 199, 199, 197, 198, 198, 198, 198, 198, 198, 198, 199, 199, 199, 199, 197, 199, 199, 198, 198, 198, 198, 198, 199, 198, 198, 198, 198, 198, 198, 197, 197, 197, 197, 198, 198, 198, 198, 198, 198, 198, 198, 197, 197, 197, 197, 197, 197, 196, 196, 196, 196, 196, 197, 196, 196, 196, 196, 196, 196, 196, 196, 196, 196, 197, 198, 198, 198, 198, 197, 198, 198, 197, 197, 197, 199, 199, 197, 198, 197, 39, 42, 78, 91, 71, 53, 96, 68, 51, 32, 18, 39, 52, 26, 71, 65, 37, 43, 18, 22, 47, 48, 47, 103, 93, 108, 81, 105, 100, 90, 55, 63, 48, 49, 23, 22, 20, 26, 33, 23, 25, 40, 30, 50, 47, 34, 30, 41, 53, 47, 34, 27, 16, 70, 107, 67, 51, 29, 30, 30, 52, 65, 78, 34, 91, 52, 52, 80, 82, 76, 65, 103, 165, 172, 139, 129, 171, 161, 173, 120, 157, 178, 155, 167, 158, 184, 192, 196, 196, 196, 196, 195, 194, 193, 194, 194, 193, 195, 195, 194, 196, 196, 196, 197, 197, 197, 197, 198, 198, 199, 200, 201, 200, 198, 200, 200, 200, 200, 198, 199, 200, 200, 200, 198, 199, 200, 201, 201, 200, 201, 200, 201, 199, 203, 200, 196, 201, 139, 67, 98, 116, 116, 190, 201, 197, 201, 200, 200, 200, 200, 202, 201, 200, 200, 200, 199, 199, 199, 199, 198, 198, 198, 198, 198, 198, 198, 198, 198, 198, 198, 198, 198, 198, 199, 199, 199, 198, 198, 198, 197, 197, 198, 198, 198, 198, 198, 198, 197, 198, 198, 198, 197, 199, 199, 198, 198, 199, 198, 198, 198, 198, 198, 198, 198, 198, 199, 199, 198, 198, 197, 197, 198, 198, 198, 198, 198, 198, 198, 197, 197, 197, 197, 197, 197, 197, 196, 197, 196, 195, 196, 196, 195, 195, 196, 197, 197, 197, 197, 196, 196, 197, 197, 197, 198, 196, 196, 196, 198, 199, 198, 198, 199, 198, 198, 199, 198, 25, 31, 30, 71, 85, 35, 73, 45, 43, 36, 28, 34, 63, 31, 27, 19, 50, 81, 49, 40, 97, 67, 80, 73, 67, 61, 52, 79, 75, 69, 42, 48, 43, 48, 47, 34, 59, 48, 52, 80, 51, 70, 39, 98, 72, 47, 49, 53, 38, 43, 27, 56, 51, 28, 35, 42, 39, 35, 50, 54, 88, 79, 59, 43, 31, 32, 46, 49, 74, 51, 73, 118, 117, 135, 161, 181, 189, 191, 194, 173, 166, 188, 175, 174, 178, 178, 190, 194, 196, 197, 196, 195, 195, 195, 196, 196, 195, 196, 196, 195, 195, 196, 197, 197, 197, 198, 198, 198, 199, 200, 200, 200, 200, 200, 200, 200, 200, 200, 201, 200, 199, 199, 200, 200, 201, 201, 201, 199, 199, 200, 201, 201, 201, 201, 200, 199, 199, 198, 136, 145, 146, 163, 204, 197, 201, 200, 200, 200, 200, 200, 201, 201, 201, 201, 201, 199, 199, 199, 199, 199, 198, 197, 198, 197, 198, 198, 198, 199, 198, 198, 199, 199, 199, 198, 198, 198, 199, 199, 198, 198, 198, 198, 198, 198, 198, 198, 198, 198, 198, 198, 198, 198, 198, 198, 198, 198, 199, 199, 199, 198, 198, 198, 198, 198, 198, 198, 198, 198, 199, 199, 198, 198, 197, 197, 198, 198, 197, 198, 198, 198, 198, 198, 198, 197, 197, 197, 197, 196, 196, 197, 196, 195, 196, 196, 196, 197, 197, 198, 198, 197, 197, 197, 197, 198, 199, 197, 198, 198, 199, 199, 199, 199, 198, 198, 198, 198, 18, 29, 105, 42, 39, 46, 76, 36, 55, 89, 40, 18, 35, 46, 5, 29, 31, 62, 42, 15, 52, 63, 63, 98, 62, 49, 53, 7, 32, 43, 17, 27, 26, 16, 16, 58, 71, 68, 77, 70, 94, 41, 54, 69, 112, 112, 65, 59, 42, 29, 28, 41, 53, 76, 45, 34, 13, 10, 57, 81, 97, 77, 96, 68, 44, 19, 37, 42, 38, 50, 110, 107, 104, 164, 138, 134, 185, 177, 193, 194, 197, 197, 196, 191, 194, 196, 193, 195, 196, 196, 197, 196, 196, 195, 195, 195, 196, 197, 197, 197, 197, 198, 197, 197, 197, 197, 198, 199, 199, 200, 200, 200, 200, 200, 200, 200, 200, 200, 200, 199, 199, 199, 200, 200, 200, 201, 201, 201, 200, 201, 201, 201, 201, 201, 200, 203, 203, 182, 125, 127, 110, 112, 163, 196, 202, 198, 199, 200, 200, 200, 200, 201, 201, 200, 200, 200, 199, 199, 199, 199, 199, 198, 198, 199, 198, 198, 198, 198, 198, 198, 198, 199, 199, 199, 198, 198, 198, 199, 200, 198, 198, 198, 198, 198, 198, 198, 198, 198, 198, 197, 197, 198, 198, 198, 198, 198, 198, 198, 198, 198, 197, 197, 197, 198, 198, 198, 198, 198, 198, 199, 198, 198, 198, 198, 198, 197, 198, 198, 198, 198, 198, 198, 198, 198, 198, 197, 197, 197, 197, 197, 197, 197, 197, 197, 197, 197, 197, 198, 197, 197, 197, 198, 197, 197, 198, 198, 197, 199, 199, 199, 199, 199, 199, 198, 198, 197, 198, 29, 15, 57, 82, 22, 51, 55, 84, 44, 52, 55, 43, 24, 30, 48, 21, 21, 44, 74, 66, 89, 96, 138, 61, 105, 122, 70, 22, 57, 45, 22, 12, 20, 55, 37, 36, 30, 24, 39, 52, 47, 45, 26, 46, 60, 40, 35, 29, 17, 34, 44, 47, 71, 101, 75, 38, 22, 59, 68, 83, 66, 62, 48, 25, 23, 34, 60, 86, 67, 89, 117, 121, 160, 189, 185, 144, 187, 197, 197, 195, 197, 196, 194, 195, 197, 196, 196, 196, 196, 198, 197, 196, 196, 196, 197, 197, 198, 198, 198, 198, 198, 197, 197, 198, 199, 198, 200, 200, 200, 200, 200, 200, 200, 200, 200, 200, 200, 200, 199, 200, 200, 200, 200, 200, 201, 201, 201, 201, 201, 202, 202, 200, 199, 203, 201, 203, 133, 83, 48, 52, 57, 93, 196, 199, 196, 199, 200, 200, 200, 200, 201, 201, 201, 200, 200, 201, 201, 201, 200, 199, 198, 198, 199, 199, 199, 198, 198, 198, 198, 198, 199, 199, 199, 198, 198, 198, 199, 199, 198, 198, 198, 198, 198, 198, 198, 198, 198, 198, 198, 198, 198, 198, 198, 198, 198, 198, 198, 199, 198, 198, 197, 198, 198, 198, 198, 198, 198, 198, 198, 198, 198, 198, 198, 198, 199, 200, 198, 197, 197, 198, 198, 198, 198, 198, 198, 197, 197, 197, 196, 196, 196, 197, 197, 197, 197, 197, 197, 197, 197, 198, 198, 198, 197, 197, 198, 198, 199, 199, 199, 199, 199, 198, 198, 197, 197, 196, 29, 23, 28, 29, 36, 53, 40, 56, 62, 37, 57, 38, 21, 22, 24, 21, 14, 14, 57, 72, 118, 96, 88, 149, 106, 125, 69, 49, 35, 51, 91, 26, 17, 18, 43, 48, 37, 48, 56, 77, 78, 115, 52, 66, 78, 40, 30, 20, 28, 43, 68, 98, 71, 122, 133, 78, 69, 76, 121, 100, 96, 74, 33, 34, 20, 64, 104, 87, 113, 116, 128, 108, 177, 195, 197, 191, 192, 198, 197, 197, 197, 197, 197, 197, 198, 197, 197, 198, 198, 197, 197, 197, 196, 196, 197, 197, 198, 198, 198, 197, 198, 198, 198, 198, 198, 198, 199, 200, 200, 199, 200, 200, 200, 200, 200, 200, 200, 200, 200, 200, 200, 200, 200, 200, 200, 201, 201, 201, 201, 201, 201, 200, 199, 201, 200, 201, 98, 41, 29, 35, 38, 60, 184, 202, 198, 199, 199, 200, 200, 200, 201, 201, 201, 200, 200, 201, 200, 201, 200, 200, 200, 200, 199, 198, 199, 198, 198, 198, 198, 198, 199, 199, 199, 198, 199, 199, 199, 199, 198, 198, 198, 198, 198, 198, 198, 198, 198, 198, 199, 198, 198, 198, 198, 198, 198, 198, 198, 198, 198, 198, 198, 198, 198, 198, 198, 198, 198, 198, 198, 198, 198, 198, 198, 198, 198, 197, 197, 197, 197, 198, 198, 198, 198, 198, 198, 197, 197, 197, 196, 196, 196, 196, 196, 198, 196, 195, 198, 198, 198, 198, 198, 198, 197, 197, 198, 197, 199, 199, 199, 198, 198, 198, 197, 197, 197, 196, 11, 11, 8, 9, 17, 13, 7, 20, 24, 25, 23, 15, 26, 21, 18, 32, 16, 33, 79, 73, 71, 116, 109, 112, 168, 106, 83, 47, 40, 45, 98, 25, 26, 21, 26, 39, 44, 53, 76, 101, 136, 102, 103, 124, 66, 71, 22, 18, 15, 37, 25, 19, 30, 41, 62, 74, 141, 97, 111, 134, 165, 98, 41, 49, 28, 60, 58, 96, 103, 124, 166, 158, 176, 193, 196, 196, 197, 197, 197, 197, 197, 197, 197, 197, 197, 198, 197, 198, 198, 197, 197, 198, 196, 196, 197, 197, 197, 198, 198, 198, 198, 198, 198, 198, 198, 198, 199, 200, 200, 201, 200, 199, 200, 201, 200, 200, 200, 200, 200, 200, 200, 200, 200, 200, 200, 201, 201, 200, 200, 199, 200, 201, 200, 194, 201, 203, 133, 85, 81, 68, 81, 99, 184, 199, 199, 201, 200, 200, 200, 201, 201, 201, 201, 200, 200, 201, 201, 201, 200, 200, 200, 200, 199, 198, 199, 199, 198, 198, 198, 198, 199, 199, 199, 198, 198, 199, 199, 199, 198, 198, 198, 198, 198, 198, 198, 198, 198, 198, 199, 198, 198, 198, 198, 198, 198, 198, 198, 198, 198, 198, 198, 198, 198, 198, 198, 198, 198, 198, 198, 198, 198, 198, 198, 198, 197, 197, 197, 197, 198, 198, 198, 198, 198, 198, 198, 198, 197, 197, 197, 197, 197, 197, 197, 197, 196, 196, 198, 198, 198, 198, 198, 198, 197, 197, 199, 198, 199, 199, 199, 198, 198, 198, 197, 197, 197, 196, 13, 10, 19, 7, 9, 17, 15, 13, 20, 36, 23, 31, 25, 16, 13, 22, 24, 20, 36, 62, 117, 124, 69, 118, 107, 102, 96, 42, 67, 56, 48, 48, 36, 38, 41, 22, 24, 30, 65, 69, 111, 140, 127, 127, 103, 68, 65, 77, 66, 35, 46, 44, 65, 39, 31, 26, 54, 117, 113, 135, 163, 195, 105, 120, 89, 50, 88, 125, 103, 72, 110, 161, 161, 192, 198, 197, 197, 200, 198, 198, 198, 198, 198, 198, 198, 197, 198, 198, 198, 198, 197, 197, 198, 196, 196, 197, 196, 197, 198, 198, 198, 198, 198, 198, 198, 198, 198, 199, 200, 200, 201, 200, 200, 200, 200, 200, 200, 200, 200, 200, 200, 200, 200, 200, 200, 200, 201, 201, 199, 199, 200, 201, 200, 201, 207, 200, 138, 42, 28, 32, 40, 36, 32, 64, 148, 199, 197, 200, 201, 201, 201, 201, 201, 202, 202, 203, 202, 201, 201, 200, 199, 200, 200, 200, 200, 199, 199, 199, 198, 198, 198, 199, 199, 199, 198, 198, 198, 199, 199, 198, 198, 198, 198, 198, 198, 198, 198, 198, 198, 199, 198, 198, 198, 198, 198, 198, 198, 198, 198, 198, 198, 198, 198, 198, 198, 198, 198, 198, 198, 198, 198, 198, 198, 198, 198, 197, 198, 196, 197, 198, 198, 198, 198, 198, 198, 198, 198, 198, 198, 198, 198, 198, 198, 198, 198, 198, 198, 198, 198, 198, 198, 198, 198, 197, 198, 200, 199, 199, 199, 199, 198, 198, 198, 197, 197, 197, 197, 24, 13, 11, 8, 13, 10, 12, 18, 29, 28, 24, 24, 24, 22, 13, 19, 41, 40, 57, 66, 130, 158, 166, 127, 125, 132, 121, 50, 72, 129, 88, 36, 86, 92, 38, 30, 53, 51, 37, 47, 96, 142, 165, 152, 135, 123, 69, 61, 72, 89, 85, 44, 55, 40, 69, 52, 55, 61, 94, 142, 133, 150, 117, 174, 114, 107, 113, 173, 156, 139, 123, 146, 169, 196, 197, 198, 198, 198, 199, 198, 198, 198, 198, 199, 199, 198, 198, 198, 198, 198, 198, 198, 198, 196, 196, 197, 196, 196, 197, 198, 198, 198, 198, 198, 198, 198, 198, 198, 199, 198, 199, 199, 200, 199, 199, 200, 200, 199, 200, 200, 200, 200, 200, 200, 200, 200, 201, 201, 201, 201, 201, 201, 200, 200, 198, 148, 35, 48, 82, 99, 98, 101, 91, 41, 48, 184, 195, 200, 200, 200, 200, 200, 201, 201, 200, 200, 201, 201, 200, 199, 200, 200, 200, 200, 199, 199, 199, 199, 198, 198, 198, 198, 198, 198, 198, 198, 198, 198, 198, 198, 198, 198, 198, 198, 198, 198, 198, 198, 199, 198, 198, 199, 197, 198, 198, 198, 198, 198, 198, 198, 198, 198, 198, 198, 198, 198, 198, 198, 198, 198, 198, 198, 198, 198, 197, 198, 198, 197, 197, 197, 197, 197, 198, 198, 198, 198, 198, 197, 198, 198, 198, 198, 198, 197, 197, 197, 198, 198, 198, 198, 198, 198, 198, 198, 198, 199, 199, 198, 198, 198, 197, 198, 198, 197, 197, 197, 197, 30, 18, 15, 15, 36, 20, 16, 21, 23, 17, 15, 19, 17, 18, 16, 23, 63, 69, 69, 126, 117, 124, 145, 89, 92, 84, 81, 81, 111, 107, 37, 63, 94, 35, 17, 42, 60, 93, 111, 95, 81, 128, 154, 173, 124, 150, 92, 71, 133, 102, 98, 75, 41, 76, 114, 71, 116, 100, 117, 154, 126, 155, 171, 142, 129, 141, 164, 189, 166, 179, 166, 193, 196, 197, 196, 198, 198, 198, 199, 199, 199, 199, 200, 200, 199, 199, 198, 198, 198, 198, 199, 198, 197, 197, 197, 196, 197, 197, 198, 199, 198, 198, 197, 197, 197, 198, 198, 198, 198, 198, 198, 199, 199, 200, 200, 201, 200, 200, 201, 201, 201, 201, 201, 200, 201, 201, 200, 200, 201, 201, 201, 199, 201, 201, 84, 38, 84, 92, 101, 100, 101, 111, 102, 38, 155, 198, 198, 200, 200, 200, 200, 200, 200, 200, 200, 200, 200, 200, 201, 200, 200, 200, 200, 200, 200, 199, 199, 199, 199, 198, 198, 198, 198, 198, 198, 198, 198, 198, 198, 198, 198, 198, 198, 198, 198, 198, 198, 198, 198, 198, 197, 196, 197, 198, 199, 199, 197, 195, 195, 196, 198, 198, 198, 198, 198, 198, 198, 198, 198, 198, 198, 198, 198, 198, 198, 198, 198, 198, 197, 197, 198, 198, 198, 198, 197, 199, 198, 197, 198, 198, 198, 198, 197, 197, 198, 198, 198, 198, 198, 198, 198, 198, 198, 198, 198, 199, 198, 198, 198, 197, 198, 197, 197, 197, 197, 197, 46, 46, 33, 16, 19, 26, 19, 19, 21, 24, 31, 29, 16, 13, 12, 22, 45, 54, 86, 89, 73, 66, 89, 111, 64, 65, 59, 80, 113, 90, 26, 23, 140, 126, 57, 89, 80, 92, 96, 115, 122, 124, 148, 160, 177, 157, 142, 82, 130, 128, 107, 109, 109, 74, 105, 116, 74, 121, 133, 140, 156, 176, 168, 170, 190, 166, 143, 199, 192, 173, 193, 196, 198, 197, 195, 197, 198, 198, 199, 199, 199, 199, 199, 199, 199, 199, 198, 198, 198, 197, 198, 197, 197, 198, 198, 197, 198, 198, 198, 198, 198, 198, 198, 198, 199, 198, 198, 198, 199, 199, 198, 198, 199, 201, 200, 201, 200, 200, 200, 200, 201, 201, 201, 201, 201, 201, 200, 199, 199, 200, 199, 199, 196, 197, 109, 51, 96, 103, 109, 117, 120, 116, 117, 44, 165, 200, 199, 200, 200, 200, 200, 200, 200, 199, 199, 200, 200, 201, 202, 200, 200, 200, 200, 200, 200, 200, 200, 200, 199, 199, 198, 198, 198, 198, 198, 198, 198, 198, 198, 198, 198, 198, 198, 198, 198, 198, 198, 199, 197, 196, 197, 198, 198, 198, 198, 197, 196, 197, 197, 198, 198, 198, 198, 198, 198, 198, 198, 198, 198, 198, 198, 197, 198, 198, 198, 198, 198, 198, 198, 198, 198, 198, 198, 198, 197, 198, 197, 197, 198, 198, 198, 198, 198, 198, 198, 198, 198, 198, 198, 198, 198, 198, 198, 198, 198, 199, 198, 198, 198, 197, 197, 197, 197, 197, 197, 197, 38, 51, 15, 13, 10, 15, 36, 64, 20, 22, 23, 26, 39, 58, 29, 18, 17, 55, 63, 70, 96, 111, 122, 105, 113, 80, 35, 42, 79, 83, 72, 39, 71, 73, 95, 77, 66, 125, 123, 124, 110, 144, 166, 170, 175, 194, 161, 176, 117, 93, 162, 129, 108, 131, 138, 121, 122, 93, 132, 174, 185, 186, 190, 168, 186, 198, 189, 167, 188, 195, 194, 196, 194, 197, 197, 198, 198, 198, 199, 199, 199, 199, 199, 199, 199, 199, 199, 198, 198, 198, 197, 197, 197, 197, 199, 199, 198, 199, 199, 198, 198, 198, 198, 198, 197, 197, 198, 199, 199, 200, 199, 199, 198, 199, 202, 199, 201, 200, 199, 199, 199, 199, 200, 200, 201, 200, 200, 201, 202, 201, 200, 199, 198, 199, 198, 168, 81, 94, 99, 102, 115, 122, 111, 114, 98, 199, 198, 201, 201, 200, 199, 200, 200, 200, 199, 199, 200, 201, 201, 201, 200, 200, 200, 200, 200, 200, 199, 199, 199, 199, 199, 198, 198, 198, 198, 198, 198, 198, 198, 198, 198, 198, 198, 198, 198, 198, 198, 198, 198, 198, 199, 198, 197, 198, 198, 198, 198, 199, 198, 198, 199, 198, 198, 198, 198, 198, 199, 199, 199, 199, 197, 197, 198, 198, 198, 198, 198, 198, 198, 199, 198, 198, 198, 198, 197, 198, 195, 196, 199, 198, 198, 198, 198, 198, 198, 198, 198, 198, 198, 198, 198, 198, 198, 198, 198, 198, 199, 198, 198, 198, 197, 197, 197, 197, 196, 196, 197, 75, 39, 29, 17, 17, 15, 53, 27, 19, 14, 22, 54, 105, 53, 70, 48, 44, 28, 65, 77, 65, 103, 131, 125, 94, 30, 39, 112, 149, 104, 74, 60, 88, 111, 112, 134, 116, 130, 158, 172, 132, 131, 144, 161, 182, 183, 149, 171, 122, 145, 167, 163, 130, 153, 148, 176, 119, 146, 190, 198, 195, 199, 191, 195, 194, 197, 195, 193, 197, 197, 197, 197, 197, 197, 197, 198, 198, 199, 199, 199, 199, 199, 200, 199, 199, 198, 197, 197, 197, 198, 198, 198, 198, 198, 198, 198, 198, 198, 198, 198, 198, 198, 198, 198, 198, 199, 199, 199, 199, 199, 199, 199, 199, 200, 201, 201, 200, 199, 200, 200, 200, 201, 201, 200, 200, 199, 199, 198, 200, 202, 195, 198, 204, 204, 192, 173, 107, 115, 124, 123, 130, 127, 120, 130, 165, 182, 200, 205, 199, 200, 194, 202, 201, 197, 201, 200, 200, 200, 200, 200, 200, 200, 200, 200, 200, 199, 198, 199, 200, 199, 198, 198, 198, 198, 198, 198, 198, 198, 198, 198, 198, 198, 198, 198, 198, 198, 198, 198, 198, 198, 198, 198, 198, 198, 198, 198, 198, 198, 198, 198, 198, 198, 198, 198, 198, 198, 198, 198, 198, 198, 198, 198, 198, 198, 198, 198, 197, 197, 197, 197, 198, 198, 199, 198, 198, 198, 198, 198, 198, 198, 198, 198, 198, 198, 198, 198, 198, 198, 198, 198, 198, 198, 198, 198, 198, 198, 196, 196, 196, 198, 199, 200, 198, 196, 197, 196, 45, 56, 101, 29, 28, 33, 30, 48, 32, 19, 29, 72, 148, 80, 37, 123, 83, 56, 78, 118, 126, 100, 100, 79, 91, 88, 71, 107, 162, 128, 133, 101, 112, 109, 84, 130, 153, 134, 134, 171, 185, 182, 167, 157, 186, 189, 126, 167, 153, 141, 173, 185, 141, 151, 167, 176, 163, 182, 193, 194, 194, 193, 197, 195, 195, 197, 196, 195, 198, 197, 197, 197, 197, 196, 197, 198, 198, 199, 199, 199, 199, 199, 200, 199, 199, 198, 197, 197, 198, 198, 198, 198, 198, 198, 198, 198, 198, 198, 198, 198, 198, 198, 198, 198, 198, 200, 200, 199, 199, 199, 199, 199, 199, 200, 200, 200, 200, 199, 200, 200, 201, 201, 201, 201, 201, 200, 200, 199, 199, 197, 202, 202, 177, 153, 123, 115, 120, 129, 137, 129, 136, 136, 119, 113, 113, 123, 123, 123, 147, 178, 203, 199, 198, 200, 200, 200, 200, 200, 200, 201, 200, 200, 199, 199, 200, 198, 198, 199, 199, 198, 198, 198, 198, 198, 198, 198, 198, 198, 198, 198, 198, 198, 198, 198, 198, 198, 198, 199, 198, 198, 198, 198, 198, 198, 198, 198, 198, 198, 198, 198, 198, 198, 198, 198, 198, 198, 198, 198, 198, 198, 198, 198, 198, 198, 197, 197, 198, 198, 199, 199, 198, 198, 198, 198, 198, 198, 198, 198, 198, 198, 198, 198, 198, 198, 198, 198, 198, 198, 198, 198, 198, 198, 198, 198, 198, 198, 198, 197, 197, 197, 199, 199, 200, 199, 198, 197, 38, 24, 56, 36, 48, 37, 104, 59, 36, 35, 25, 76, 139, 58, 56, 111, 103, 105, 145, 100, 85, 137, 131, 152, 109, 142, 132, 90, 116, 126, 109, 106, 101, 135, 127, 90, 157, 164, 150, 156, 178, 187, 187, 194, 195, 189, 141, 134, 152, 157, 163, 176, 191, 140, 136, 139, 143, 164, 181, 193, 195, 196, 195, 196, 195, 196, 195, 196, 196, 196, 196, 197, 197, 197, 197, 198, 198, 199, 199, 199, 199, 199, 199, 199, 199, 199, 198, 198, 198, 198, 198, 199, 199, 198, 198, 198, 198, 198, 198, 198, 199, 199, 198, 198, 198, 199, 199, 198, 198, 198, 198, 198, 198, 199, 199, 199, 199, 199, 200, 201, 201, 201, 201, 202, 201, 201, 200, 198, 202, 190, 151, 132, 129, 129, 122, 117, 125, 130, 128, 127, 131, 128, 118, 121, 119, 124, 121, 115, 125, 134, 135, 162, 191, 201, 199, 199, 199, 199, 199, 199, 199, 200, 200, 200, 200, 199, 198, 199, 199, 199, 199, 199, 199, 198, 198, 198, 198, 198, 198, 198, 198, 198, 198, 198, 198, 198, 198, 198, 198, 199, 199, 199, 199, 199, 199, 199, 199, 199, 199, 199, 198, 198, 198, 198, 198, 198, 198, 198, 198, 198, 198, 198, 198, 198, 198, 198, 198, 198, 199, 199, 199, 198, 198, 198, 198, 198, 198, 198, 198, 198, 198, 198, 198, 198, 198, 198, 198, 198, 198, 198, 198, 198, 198, 198, 198, 198, 198, 198, 198, 198, 199, 198, 198, 199, 198, 199, 26, 33, 44, 78, 71, 117, 89, 95, 54, 25, 28, 113, 71, 33, 70, 91, 162, 97, 99, 86, 88, 143, 143, 111, 123, 159, 135, 107, 49, 96, 131, 133, 134, 158, 146, 106, 122, 172, 177, 166, 174, 182, 189, 171, 178, 175, 128, 133, 172, 145, 166, 166, 141, 115, 94, 152, 175, 175, 169, 184, 192, 194, 194, 196, 195, 196, 195, 196, 196, 196, 196, 197, 197, 197, 197, 198, 198, 198, 198, 198, 198, 198, 198, 198, 198, 198, 198, 198, 198, 198, 198, 198, 198, 198, 198, 198, 198, 198, 198, 198, 199, 199, 198, 198, 198, 198, 198, 198, 198, 198, 198, 198, 198, 199, 198, 198, 198, 198, 199, 199, 199, 198, 198, 203, 198, 203, 196, 197, 135, 120, 117, 123, 121, 116, 110, 115, 119, 131, 121, 124, 123, 133, 130, 117, 113, 115, 120, 123, 131, 139, 147, 148, 147, 169, 201, 198, 197, 199, 200, 199, 200, 202, 202, 202, 199, 199, 199, 198, 199, 199, 200, 200, 198, 198, 198, 199, 198, 198, 198, 198, 198, 198, 198, 198, 198, 198, 198, 198, 198, 198, 199, 200, 200, 199, 199, 199, 199, 199, 199, 198, 198, 198, 198, 198, 198, 198, 198, 198, 198, 198, 197, 198, 198, 197, 198, 198, 198, 199, 198, 199, 199, 198, 198, 198, 198, 198, 198, 198, 198, 198, 199, 198, 198, 198, 198, 198, 198, 198, 198, 198, 198, 198, 198, 198, 198, 198, 199, 199, 200, 199, 200, 197, 197, 198, 198, 198, 27, 40, 42, 106, 94, 149, 131, 67, 82, 37, 26, 44, 43, 59, 66, 107, 137, 158, 79, 72, 91, 86, 104, 77, 113, 93, 79, 74, 118, 95, 119, 187, 176, 173, 176, 160, 134, 145, 174, 179, 164, 163, 163, 175, 186, 162, 134, 141, 145, 146, 122, 110, 122, 151, 174, 180, 180, 180, 178, 186, 193, 196, 195, 195, 196, 196, 196, 196, 196, 197, 197, 197, 197, 197, 197, 198, 198, 198, 198, 198, 198, 198, 198, 198, 198, 198, 198, 198, 198, 198, 198, 198, 198, 198, 198, 198, 198, 198, 198, 198, 199, 199, 198, 198, 198, 198, 198, 198, 198, 197, 198, 198, 199, 199, 198, 198, 198, 198, 200, 200, 199, 199, 198, 197, 199, 199, 156, 120, 121, 122, 122, 122, 130, 133, 130, 118, 116, 118, 109, 111, 116, 126, 116, 115, 113, 108, 119, 123, 123, 129, 139, 142, 149, 146, 153, 181, 199, 198, 201, 199, 200, 201, 201, 200, 199, 199, 200, 199, 199, 199, 199, 200, 198, 198, 199, 199, 198, 198, 198, 198, 198, 198, 198, 198, 198, 198, 198, 198, 198, 198, 199, 199, 199, 199, 199, 199, 199, 199, 199, 198, 198, 198, 198, 198, 198, 198, 198, 198, 198, 199, 198, 198, 199, 198, 198, 198, 198, 199, 198, 199, 199, 198, 198, 198, 198, 198, 198, 198, 199, 198, 199, 198, 198, 198, 198, 198, 198, 198, 198, 198, 198, 198, 198, 198, 198, 198, 199, 199, 199, 199, 199, 197, 197, 198, 198, 198, 31, 98, 108, 99, 116, 101, 165, 88, 48, 23, 26, 36, 43, 31, 31, 61, 96, 98, 57, 23, 35, 61, 47, 79, 83, 108, 125, 116, 163, 167, 121, 118, 176, 189, 187, 179, 178, 144, 166, 170, 141, 153, 170, 185, 184, 121, 89, 85, 97, 77, 84, 112, 141, 163, 176, 182, 191, 191, 191, 191, 195, 196, 196, 196, 196, 197, 196, 197, 198, 198, 197, 197, 197, 197, 197, 198, 198, 198, 198, 198, 198, 198, 198, 198, 198, 198, 198, 198, 198, 198, 198, 198, 198, 198, 198, 198, 198, 198, 198, 198, 198, 198, 198, 198, 198, 198, 198, 198, 198, 198, 198, 198, 197, 197, 198, 198, 198, 198, 199, 199, 198, 199, 200, 199, 190, 135, 109, 115, 124, 123, 127, 115, 111, 112, 78, 75, 63, 30, 42, 26, 17, 22, 17, 21, 21, 17, 32, 33, 38, 76, 97, 114, 134, 141, 132, 142, 167, 196, 198, 201, 200, 199, 200, 200, 200, 200, 200, 199, 200, 198, 198, 199, 199, 198, 199, 199, 199, 198, 199, 199, 198, 197, 198, 198, 198, 198, 198, 199, 198, 199, 199, 199, 199, 199, 199, 199, 199, 199, 199, 198, 198, 198, 198, 198, 198, 198, 198, 198, 198, 199, 198, 198, 199, 198, 199, 198, 198, 198, 198, 199, 199, 198, 199, 198, 198, 198, 198, 199, 199, 198, 199, 198, 198, 198, 198, 199, 199, 198, 198, 198, 198, 198, 198, 198, 198, 198, 199, 199, 199, 199, 199, 198, 198, 198, 197, 198, 49, 102, 123, 145, 160, 85, 128, 87, 39, 24, 16, 14, 28, 47, 71, 154, 113, 49, 35, 24, 26, 25, 21, 21, 41, 68, 77, 82, 117, 137, 142, 124, 143, 145, 104, 132, 165, 183, 129, 136, 166, 190, 180, 155, 173, 59, 31, 24, 22, 30, 51, 65, 88, 89, 102, 110, 161, 179, 192, 197, 196, 195, 195, 196, 197, 197, 197, 197, 198, 198, 198, 198, 197, 198, 198, 197, 197, 198, 198, 198, 198, 198, 198, 198, 198, 198, 198, 198, 198, 198, 198, 198, 198, 198, 198, 198, 198, 198, 198, 198, 198, 198, 198, 198, 198, 198, 198, 198, 198, 196, 197, 197, 198, 199, 198, 198, 198, 198, 199, 199, 198, 198, 197, 184, 120, 129, 126, 117, 115, 110, 106, 50, 17, 19, 12, 18, 19, 7, 14, 12, 8, 12, 13, 10, 13, 11, 11, 13, 10, 13, 14, 18, 12, 22, 41, 59, 114, 125, 138, 156, 191, 200, 198, 197, 198, 199, 201, 200, 200, 198, 199, 198, 198, 199, 199, 199, 199, 199, 199, 198, 199, 200, 199, 197, 199, 199, 199, 199, 199, 199, 199, 199, 199, 198, 198, 199, 199, 199, 199, 199, 199, 198, 199, 199, 199, 199, 199, 199, 199, 199, 199, 199, 198, 198, 199, 198, 199, 198, 198, 198, 198, 199, 199, 199, 199, 199, 199, 199, 199, 199, 199, 199, 199, 198, 198, 198, 199, 199, 199, 198, 198, 198, 198, 198, 198, 198, 198, 198, 199, 199, 200, 199, 198, 198, 198, 198, 197, 198, 31, 50, 82, 110, 69, 55, 50, 23, 35, 28, 28, 24, 52, 86, 92, 76, 106, 90, 76, 72, 52, 106, 73, 43, 55, 62, 112, 114, 148, 160, 176, 177, 166, 154, 189, 201, 186, 130, 132, 122, 89, 71, 55, 52, 50, 29, 23, 69, 64, 82, 109, 94, 112, 143, 160, 180, 185, 176, 178, 196, 197, 197, 194, 196, 197, 197, 197, 197, 198, 198, 197, 197, 197, 198, 198, 198, 198, 198, 198, 198, 198, 198, 197, 197, 197, 197, 197, 198, 198, 198, 198, 198, 198, 198, 198, 198, 198, 198, 199, 199, 198, 199, 198, 197, 198, 198, 199, 198, 198, 198, 198, 198, 198, 198, 199, 198, 198, 198, 197, 199, 198, 196, 174, 115, 124, 117, 93, 71, 44, 18, 15, 13, 13, 11, 13, 10, 8, 13, 11, 17, 22, 23, 27, 23, 24, 21, 16, 22, 13, 14, 12, 13, 10, 12, 14, 13, 31, 43, 77, 105, 136, 185, 202, 200, 200, 200, 201, 200, 200, 199, 200, 199, 198, 199, 200, 199, 199, 199, 199, 199, 199, 200, 199, 197, 199, 199, 199, 199, 199, 199, 199, 199, 199, 199, 199, 199, 199, 199, 199, 199, 199, 199, 199, 198, 198, 200, 200, 199, 199, 199, 199, 200, 199, 199, 200, 199, 200, 200, 198, 198, 198, 199, 199, 199, 199, 198, 198, 198, 198, 199, 199, 198, 198, 198, 198, 198, 198, 198, 198, 197, 198, 198, 198, 198, 198, 198, 198, 198, 199, 199, 199, 199, 198, 198, 198, 198, 198, 199, 120, 145, 74, 53, 56, 67, 43, 45, 50, 29, 36, 35, 46, 48, 45, 95, 90, 35, 56, 61, 45, 57, 72, 79, 84, 87, 114, 80, 107, 153, 162, 169, 183, 201, 190, 169, 89, 80, 110, 89, 143, 185, 183, 171, 136, 93, 75, 77, 99, 84, 111, 137, 168, 170, 146, 143, 152, 164, 169, 193, 196, 196, 198, 195, 197, 197, 196, 197, 198, 198, 198, 198, 198, 198, 198, 198, 198, 198, 198, 198, 197, 196, 200, 200, 200, 200, 199, 199, 199, 199, 199, 198, 198, 198, 198, 198, 198, 198, 198, 198, 199, 199, 198, 198, 199, 198, 199, 198, 198, 200, 200, 200, 200, 200, 199, 199, 199, 198, 200, 199, 199, 183, 116, 122, 78, 47, 24, 13, 16, 13, 13, 10, 11, 16, 26, 40, 48, 59, 63, 65, 70, 73, 66, 51, 58, 60, 58, 68, 62, 57, 45, 40, 27, 13, 10, 12, 12, 18, 18, 29, 54, 107, 183, 199, 201, 199, 200, 200, 201, 201, 201, 201, 201, 201, 201, 200, 199, 199, 199, 199, 199, 199, 199, 198, 199, 199, 199, 199, 199, 199, 199, 199, 199, 199, 199, 199, 199, 199, 200, 198, 198, 199, 200, 198, 199, 200, 200, 201, 200, 200, 200, 200, 199, 200, 200, 199, 199, 200, 199, 198, 198, 199, 200, 199, 199, 198, 198, 198, 198, 198, 198, 198, 198, 198, 199, 199, 199, 199, 199, 199, 198, 198, 198, 198, 198, 198, 198, 198, 200, 199, 199, 199, 198, 198, 198, 198, 198, 199, 20, 21, 28, 91, 99, 79, 65, 86, 79, 45, 48, 42, 32, 18, 22, 26, 30, 27, 58, 40, 34, 58, 81, 63, 62, 105, 96, 115, 135, 129, 159, 199, 196, 197, 200, 190, 121, 111, 60, 93, 146, 145, 143, 152, 112, 114, 112, 51, 103, 154, 83, 81, 122, 156, 173, 195, 183, 198, 182, 176, 195, 194, 196, 198, 197, 198, 197, 198, 198, 198, 198, 198, 198, 198, 198, 198, 198, 197, 197, 197, 197, 197, 198, 198, 198, 198, 198, 199, 199, 199, 199, 198, 198, 198, 198, 198, 198, 198, 198, 198, 198, 199, 198, 197, 198, 198, 199, 198, 198, 199, 199, 199, 199, 199, 198, 197, 199, 200, 199, 194, 185, 121, 105, 57, 21, 11, 12, 11, 13, 10, 19, 33, 66, 71, 77, 75, 76, 73, 76, 79, 76, 48, 41, 72, 51, 47, 57, 82, 76, 80, 77, 78, 75, 58, 45, 24, 12, 11, 13, 20, 36, 83, 183, 200, 199, 200, 201, 201, 201, 201, 201, 201, 201, 201, 200, 199, 199, 199, 199, 199, 199, 199, 199, 199, 199, 199, 199, 199, 199, 199, 199, 199, 199, 199, 199, 199, 199, 199, 199, 199, 199, 200, 199, 199, 200, 200, 200, 200, 200, 200, 201, 200, 200, 200, 199, 199, 200, 199, 199, 199, 200, 200, 199, 199, 199, 199, 199, 199, 198, 198, 199, 199, 199, 199, 199, 199, 199, 199, 199, 199, 199, 199, 199, 199, 199, 199, 199, 200, 200, 200, 199, 198, 198, 198, 198, 198, 199, 45, 50, 72, 73, 92, 94, 43, 56, 70, 69, 92, 100, 52, 41, 38, 17, 12, 15, 13, 30, 33, 48, 81, 117, 89, 84, 81, 82, 97, 138, 164, 183, 199, 197, 188, 194, 158, 136, 149, 52, 123, 167, 168, 149, 130, 130, 137, 109, 111, 130, 166, 97, 122, 133, 134, 123, 148, 182, 191, 194, 195, 197, 197, 197, 198, 198, 198, 197, 197, 198, 198, 198, 197, 197, 198, 198, 198, 197, 197, 197, 198, 198, 199, 199, 199, 199, 199, 199, 199, 199, 199, 198, 198, 198, 198, 198, 197, 197, 197, 197, 198, 198, 198, 198, 198, 198, 198, 198, 198, 198, 197, 196, 197, 197, 195, 198, 198, 196, 199, 197, 127, 88, 26, 13, 17, 12, 12, 33, 56, 68, 73, 74, 65, 46, 39, 71, 78, 78, 78, 78, 63, 44, 26, 37, 42, 76, 82, 79, 73, 33, 30, 58, 72, 79, 77, 62, 30, 13, 13, 16, 29, 91, 138, 203, 198, 201, 199, 201, 199, 200, 200, 201, 200, 199, 199, 199, 199, 199, 199, 199, 199, 199, 199, 199, 199, 199, 199, 199, 199, 199, 199, 198, 199, 199, 199, 199, 198, 199, 199, 199, 200, 199, 199, 199, 200, 201, 200, 199, 200, 198, 200, 200, 201, 198, 199, 199, 199, 199, 199, 199, 199, 199, 199, 199, 199, 200, 201, 201, 200, 200, 200, 200, 199, 199, 199, 199, 199, 199, 199, 200, 200, 200, 200, 200, 200, 200, 201, 200, 199, 198, 199, 199, 199, 199, 199, 199, 79, 112, 89, 92, 83, 127, 74, 128, 46, 44, 115, 71, 31, 34, 18, 18, 20, 14, 28, 72, 68, 80, 118, 154, 158, 165, 136, 141, 126, 134, 159, 195, 197, 192, 198, 194, 157, 130, 181, 100, 75, 132, 175, 173, 133, 138, 145, 166, 110, 113, 123, 165, 122, 117, 151, 168, 182, 167, 167, 193, 198, 197, 196, 199, 198, 198, 198, 197, 197, 197, 198, 198, 197, 197, 198, 198, 198, 198, 198, 198, 198, 198, 199, 199, 199, 199, 199, 199, 199, 199, 199, 198, 198, 198, 198, 198, 198, 198, 198, 198, 198, 198, 198, 198, 198, 198, 198, 198, 198, 197, 198, 198, 198, 197, 201, 197, 198, 195, 204, 140, 46, 17, 16, 12, 14, 34, 70, 74, 74, 72, 78, 53, 18, 21, 22, 25, 27, 39, 22, 18, 30, 52, 64, 51, 16, 32, 71, 57, 38, 30, 36, 23, 22, 39, 75, 84, 76, 55, 29, 12, 13, 13, 34, 120, 201, 200, 199, 200, 198, 198, 198, 199, 200, 198, 199, 199, 200, 199, 199, 199, 199, 199, 200, 200, 200, 200, 199, 199, 199, 199, 199, 200, 199, 199, 199, 198, 198, 197, 198, 199, 200, 200, 200, 200, 200, 200, 200, 199, 200, 198, 200, 200, 201, 198, 199, 199, 199, 200, 200, 200, 200, 200, 200, 200, 200, 200, 199, 199, 200, 200, 200, 200, 199, 199, 200, 199, 199, 199, 199, 200, 200, 200, 200, 200, 200, 200, 201, 201, 200, 200, 200, 200, 199, 199, 198, 199, 49, 93, 102, 53, 45, 107, 61, 88, 55, 118, 98, 45, 13, 22, 16, 13, 17, 16, 23, 38, 63, 119, 111, 125, 146, 165, 180, 177, 181, 143, 182, 174, 197, 200, 197, 191, 169, 153, 150, 149, 105, 131, 152, 189, 135, 170, 146, 161, 152, 99, 142, 135, 144, 137, 137, 166, 183, 182, 197, 195, 199, 198, 196, 198, 198, 198, 198, 197, 197, 198, 198, 198, 197, 197, 198, 198, 198, 198, 198, 198, 198, 198, 198, 198, 198, 198, 198, 198, 198, 198, 198, 198, 198, 198, 198, 198, 199, 199, 199, 199, 198, 198, 198, 198, 198, 198, 198, 198, 198, 198, 198, 198, 198, 198, 199, 199, 198, 199, 115, 35, 21, 16, 13, 24, 59, 74, 72, 74, 73, 72, 49, 30, 41, 43, 46, 47, 49, 52, 66, 64, 83, 75, 78, 76, 71, 72, 61, 64, 42, 35, 17, 34, 54, 34, 56, 64, 70, 73, 74, 37, 13, 10, 16, 19, 22, 114, 205, 203, 202, 199, 199, 199, 199, 200, 199, 200, 200, 200, 200, 200, 200, 200, 200, 200, 200, 199, 199, 199, 199, 199, 199, 199, 199, 199, 199, 199, 199, 200, 199, 199, 200, 200, 201, 201, 201, 200, 200, 199, 199, 200, 199, 200, 200, 201, 198, 199, 199, 199, 200, 200, 200, 200, 200, 200, 199, 199, 199, 198, 199, 200, 200, 200, 200, 199, 199, 200, 200, 200, 200, 200, 200, 200, 200, 200, 200, 200, 200, 202, 201, 200, 199, 200, 200, 200, 199, 199, 199, 30, 38, 28, 31, 12, 21, 30, 37, 40, 67, 53, 23, 17, 12, 17, 16, 19, 22, 28, 79, 77, 107, 141, 138, 167, 168, 145, 180, 194, 186, 176, 190, 199, 199, 198, 195, 189, 166, 147, 191, 145, 118, 140, 165, 131, 178, 151, 188, 167, 156, 104, 143, 174, 169, 173, 158, 187, 192, 196, 197, 197, 198, 198, 197, 198, 198, 198, 197, 197, 198, 198, 198, 197, 197, 198, 198, 198, 199, 198, 198, 198, 198, 198, 198, 198, 198, 198, 198, 198, 198, 198, 198, 198, 198, 198, 198, 197, 197, 197, 197, 198, 198, 198, 198, 198, 198, 198, 198, 198, 198, 197, 197, 197, 197, 199, 196, 197, 145, 46, 21, 13, 9, 42, 71, 69, 70, 54, 64, 56, 44, 46, 60, 82, 75, 75, 74, 62, 77, 72, 74, 61, 73, 59, 40, 67, 56, 80, 45, 71, 68, 80, 84, 74, 70, 67, 34, 42, 50, 56, 73, 45, 19, 12, 22, 43, 136, 198, 201, 199, 199, 199, 197, 197, 199, 199, 199, 199, 199, 199, 199, 199, 199, 199, 199, 199, 199, 199, 199, 198, 198, 199, 198, 199, 199, 199, 199, 199, 199, 199, 200, 198, 199, 199, 199, 198, 199, 199, 199, 199, 199, 200, 200, 200, 199, 200, 200, 199, 200, 199, 199, 199, 199, 200, 200, 199, 199, 200, 200, 200, 200, 200, 200, 199, 199, 200, 200, 200, 200, 200, 200, 200, 200, 200, 200, 200, 200, 199, 200, 199, 199, 199, 199, 200, 200, 200, 199, 18, 21, 24, 15, 16, 16, 16, 18, 35, 48, 25, 25, 17, 17, 15, 28, 38, 26, 29, 36, 61, 66, 141, 145, 158, 167, 176, 181, 200, 200, 202, 201, 197, 197, 196, 199, 196, 191, 177, 179, 177, 158, 155, 153, 142, 177, 180, 182, 191, 187, 160, 167, 162, 188, 192, 195, 189, 194, 199, 197, 197, 199, 199, 198, 198, 198, 198, 198, 198, 198, 198, 198, 198, 198, 198, 199, 198, 199, 199, 198, 198, 198, 198, 198, 198, 198, 199, 199, 199, 198, 198, 198, 198, 198, 198, 198, 198, 197, 197, 198, 198, 198, 198, 198, 198, 198, 198, 198, 198, 198, 198, 199, 199, 198, 194, 201, 149, 39, 18, 12, 17, 43, 77, 74, 68, 45, 64, 75, 73, 92, 77, 53, 46, 36, 20, 47, 20, 57, 45, 52, 28, 53, 31, 56, 83, 83, 100, 34, 47, 22, 75, 16, 48, 54, 62, 80, 82, 45, 38, 25, 42, 46, 21, 8, 20, 47, 170, 201, 199, 199, 199, 198, 198, 199, 198, 199, 199, 199, 200, 200, 200, 199, 199, 199, 200, 200, 199, 199, 198, 198, 199, 199, 199, 199, 199, 199, 199, 199, 199, 200, 199, 199, 198, 199, 199, 199, 199, 199, 199, 200, 200, 200, 200, 200, 200, 200, 200, 199, 199, 199, 200, 200, 200, 200, 200, 199, 199, 199, 200, 200, 200, 200, 200, 200, 200, 201, 201, 201, 201, 201, 201, 201, 201, 201, 201, 201, 200, 201, 201, 200, 199, 199, 200, 200, 200, 200, 14, 27, 25, 18, 15, 19, 13, 11, 16, 24, 42, 30, 27, 20, 22, 23, 74, 78, 99, 84, 80, 95, 126, 164, 171, 175, 194, 199, 200, 199, 199, 200, 201, 201, 201, 200, 199, 192, 193, 176, 181, 184, 170, 201, 180, 193, 198, 196, 197, 193, 191, 188, 192, 197, 197, 196, 198, 198, 198, 199, 198, 198, 199, 198, 198, 198, 198, 198, 198, 198, 198, 198, 198, 198, 198, 199, 198, 199, 198, 198, 198, 198, 198, 198, 198, 198, 199, 199, 199, 199, 198, 198, 198, 198, 198, 198, 198, 198, 198, 198, 198, 198, 198, 198, 198, 198, 198, 198, 198, 198, 199, 199, 199, 199, 198, 183, 57, 26, 14, 14, 54, 78, 79, 80, 61, 74, 93, 72, 75, 55, 66, 24, 41, 27, 22, 55, 26, 55, 19, 47, 24, 45, 22, 58, 78, 88, 86, 34, 52, 32, 69, 21, 44, 32, 32, 60, 44, 68, 61, 74, 42, 64, 52, 21, 18, 18, 71, 200, 200, 199, 199, 199, 199, 199, 198, 199, 199, 198, 199, 199, 199, 199, 200, 199, 200, 199, 199, 198, 198, 199, 199, 199, 199, 199, 199, 199, 199, 199, 199, 199, 199, 199, 199, 199, 199, 199, 199, 200, 200, 200, 200, 200, 200, 200, 199, 200, 200, 200, 200, 200, 200, 200, 200, 200, 200, 200, 200, 200, 200, 200, 200, 200, 200, 200, 201, 201, 201, 201, 201, 201, 201, 201, 201, 201, 201, 201, 202, 202, 202, 201, 200, 200, 200, 200, 200, 200, 12, 18, 43, 34, 16, 19, 17, 37, 27, 21, 22, 33, 45, 31, 34, 24, 56, 103, 123, 81, 124, 116, 153, 139, 169, 192, 198, 200, 197, 201, 199, 201, 199, 199, 199, 199, 200, 193, 192, 186, 191, 196, 198, 196, 199, 199, 199, 203, 198, 198, 197, 197, 198, 198, 196, 199, 199, 196, 199, 200, 198, 197, 198, 198, 198, 198, 198, 198, 198, 198, 198, 198, 198, 198, 198, 199, 198, 198, 198, 198, 198, 199, 199, 198, 198, 199, 199, 199, 199, 199, 199, 199, 199, 199, 199, 199, 198, 199, 199, 198, 199, 199, 199, 199, 199, 199, 199, 199, 199, 198, 199, 199, 199, 199, 200, 110, 23, 14, 14, 40, 69, 72, 82, 85, 79, 81, 73, 67, 82, 68, 69, 27, 51, 31, 40, 53, 48, 52, 26, 52, 22, 45, 19, 49, 62, 82, 84, 43, 43, 27, 60, 20, 50, 27, 44, 50, 29, 48, 29, 36, 89, 88, 82, 49, 20, 22, 27, 159, 199, 200, 200, 200, 199, 199, 198, 198, 198, 199, 199, 200, 199, 199, 200, 199, 200, 199, 198, 198, 199, 199, 199, 199, 199, 199, 199, 199, 199, 199, 199, 199, 200, 199, 199, 199, 200, 199, 199, 200, 200, 199, 199, 199, 199, 199, 199, 200, 200, 200, 200, 200, 201, 201, 201, 201, 201, 201, 201, 201, 200, 200, 200, 200, 201, 201, 201, 201, 201, 201, 201, 201, 201, 201, 201, 201, 201, 201, 202, 202, 201, 200, 200, 200, 200, 200, 200, 199, 14, 31, 27, 30, 21, 16, 25, 30, 25, 12, 21, 34, 66, 56, 64, 56, 91, 99, 113, 110, 154, 167, 133, 136, 144, 161, 165, 164, 178, 193, 199, 198, 198, 198, 198, 197, 198, 198, 198, 198, 198, 198, 198, 198, 198, 198, 198, 198, 199, 199, 196, 198, 199, 198, 197, 198, 198, 198, 198, 199, 199, 198, 198, 198, 198, 198, 198, 198, 198, 198, 198, 198, 198, 198, 198, 198, 198, 197, 197, 197, 196, 198, 199, 199, 199, 199, 199, 199, 198, 199, 198, 198, 199, 200, 200, 200, 201, 200, 200, 200, 200, 201, 200, 201, 200, 200, 199, 199, 200, 199, 200, 199, 199, 200, 175, 42, 20, 13, 10, 34, 75, 83, 88, 80, 83, 66, 83, 76, 79, 85, 49, 70, 32, 59, 44, 46, 46, 47, 46, 41, 38, 40, 39, 36, 36, 31, 35, 45, 44, 42, 37, 52, 33, 53, 32, 56, 43, 31, 51, 25, 59, 98, 91, 98, 93, 73, 33, 25, 80, 199, 197, 200, 195, 198, 199, 199, 199, 199, 199, 201, 201, 199, 200, 200, 200, 200, 199, 198, 198, 199, 198, 199, 199, 199, 200, 199, 199, 199, 199, 199, 199, 199, 199, 199, 199, 199, 198, 199, 200, 200, 199, 199, 199, 199, 199, 200, 200, 200, 200, 200, 200, 201, 201, 201, 200, 201, 201, 200, 201, 201, 200, 200, 201, 201, 201, 201, 201, 201, 201, 201, 201, 201, 201, 201, 201, 201, 201, 202, 201, 201, 199, 200, 200, 200, 200, 200, 200, 24, 41, 37, 31, 28, 44, 25, 21, 18, 17, 35, 63, 117, 64, 95, 117, 105, 73, 84, 99, 73, 99, 134, 169, 174, 182, 180, 186, 190, 196, 199, 200, 199, 198, 196, 199, 199, 198, 199, 198, 197, 198, 198, 198, 198, 197, 197, 197, 197, 198, 197, 198, 199, 198, 198, 198, 198, 198, 198, 199, 199, 198, 198, 198, 198, 198, 198, 198, 198, 198, 198, 198, 197, 198, 198, 198, 198, 198, 199, 199, 199, 200, 199, 199, 198, 198, 198, 199, 199, 200, 199, 199, 199, 201, 201, 201, 201, 201, 201, 200, 200, 201, 200, 201, 200, 200, 200, 200, 200, 203, 199, 200, 201, 198, 119, 30, 15, 19, 58, 78, 81, 45, 63, 75, 64, 89, 79, 84, 78, 62, 55, 45, 35, 27, 22, 17, 15, 14, 11, 12, 13, 10, 12, 11, 11, 13, 10, 14, 17, 19, 18, 17, 17, 25, 24, 37, 42, 48, 37, 55, 56, 92, 95, 92, 100, 96, 85, 89, 57, 35, 181, 201, 199, 197, 199, 199, 199, 200, 200, 200, 200, 199, 199, 199, 199, 199, 199, 199, 199, 199, 199, 199, 199, 198, 199, 199, 199, 199, 199, 199, 199, 199, 199, 199, 199, 198, 198, 199, 199, 200, 200, 199, 199, 199, 199, 199, 200, 200, 200, 200, 200, 200, 201, 201, 201, 201, 200, 202, 201, 200, 201, 200, 200, 201, 201, 201, 201, 201, 201, 201, 201, 201, 201, 201, 201, 201, 201, 201, 201, 201, 200, 199, 200, 200, 200, 200, 201, 199, 28, 53, 48, 28, 27, 23, 27, 71, 65, 90, 62, 53, 70, 87, 132, 119, 127, 112, 97, 104, 119, 152, 168, 168, 186, 179, 174, 166, 168, 174, 179, 179, 190, 199, 196, 199, 198, 199, 199, 198, 198, 198, 198, 198, 198, 198, 198, 198, 198, 198, 198, 198, 198, 198, 198, 198, 198, 198, 198, 198, 198, 198, 198, 198, 198, 198, 198, 198, 198, 198, 197, 197, 197, 198, 198, 198, 198, 199, 199, 199, 198, 199, 200, 199, 199, 198, 199, 199, 199, 202, 202, 201, 201, 201, 201, 201, 202, 201, 201, 201, 200, 201, 200, 201, 200, 200, 201, 201, 200, 197, 202, 200, 199, 206, 65, 35, 38, 81, 66, 59, 68, 55, 67, 79, 72, 79, 61, 49, 30, 19, 14, 14, 15, 13, 9, 11, 11, 9, 13, 10, 9, 9, 8, 9, 8, 8, 9, 8, 8, 9, 11, 12, 11, 13, 14, 19, 22, 25, 33, 50, 72, 86, 83, 86, 73, 79, 54, 82, 79, 142, 185, 197, 199, 199, 199, 198, 199, 201, 201, 200, 198, 200, 200, 199, 198, 198, 198, 199, 199, 199, 200, 199, 198, 198, 199, 199, 199, 198, 199, 199, 200, 200, 200, 200, 200, 200, 200, 199, 199, 199, 199, 199, 199, 199, 199, 200, 200, 200, 200, 200, 200, 201, 201, 201, 201, 199, 199, 200, 200, 201, 201, 201, 201, 201, 201, 201, 201, 201, 201, 200, 200, 201, 201, 201, 201, 201, 201, 201, 201, 200, 200, 200, 200, 201, 201, 201, 200, 42, 68, 75, 42, 33, 19, 54, 110, 104, 145, 136, 122, 105, 110, 101, 126, 142, 136, 105, 77, 63, 71, 102, 128, 119, 110, 116, 138, 167, 177, 182, 191, 198, 200, 201, 198, 200, 198, 199, 197, 199, 198, 197, 196, 198, 197, 197, 198, 198, 199, 198, 198, 198, 198, 198, 198, 198, 198, 198, 198, 198, 198, 198, 198, 198, 199, 199, 199, 200, 200, 199, 199, 199, 200, 200, 200, 200, 199, 199, 198, 199, 200, 201, 200, 200, 200, 200, 200, 200, 201, 201, 201, 201, 202, 202, 202, 202, 201, 201, 201, 201, 201, 201, 201, 201, 202, 203, 203, 203, 201, 202, 200, 200, 192, 44, 65, 86, 72, 61, 55, 67, 36, 57, 61, 47, 31, 19, 13, 13, 10, 7, 9, 13, 10, 13, 10, 13, 10, 9, 13, 10, 9, 13, 10, 7, 7, 6, 8, 6, 9, 8, 13, 10, 11, 11, 8, 7, 8, 7, 5, 9, 13, 10, 9, 13, 17, 20, 19, 20, 40, 54, 52, 47, 63, 65, 76, 81, 136, 177, 202, 201, 200, 198, 199, 200, 200, 199, 199, 199, 199, 198, 198, 199, 199, 199, 199, 199, 200, 200, 198, 198, 199, 199, 199, 199, 198, 199, 200, 201, 200, 199, 199, 200, 200, 199, 199, 199, 199, 199, 199, 199, 199, 200, 200, 200, 200, 200, 200, 200, 200, 201, 201, 201, 200, 200, 201, 203, 201, 201, 201, 201, 201, 201, 201, 201, 201, 200, 200, 201, 201, 201, 201, 201, 201, 201, 201, 201, 201, 201, 201, 201, 201, 201, 201, 32, 69, 36, 58, 50, 49, 95, 129, 152, 170, 143, 141, 127, 154, 154, 138, 138, 145, 73, 78, 133, 87, 57, 86, 77, 84, 99, 142, 182, 190, 186, 189, 194, 198, 200, 197, 200, 199, 197, 197, 197, 198, 197, 200, 198, 199, 199, 198, 198, 198, 198, 198, 198, 198, 198, 198, 198, 198, 198, 198, 197, 197, 198, 199, 199, 200, 200, 200, 200, 200, 200, 199, 200, 199, 199, 199, 199, 199, 200, 201, 200, 201, 201, 201, 201, 201, 201, 201, 201, 201, 201, 201, 201, 202, 203, 203, 203, 201, 201, 201, 202, 202, 202, 202, 202, 203, 203, 203, 203, 204, 203, 200, 196, 152, 73, 79, 56, 71, 59, 64, 67, 37, 40, 22, 17, 12, 9, 8, 13, 10, 9, 11, 8, 13, 10, 13, 10, 13, 10, 12, 12, 12, 11, 14, 13, 13, 14, 12, 11, 14, 12, 11, 13, 14, 13, 10, 9, 13, 10, 12, 9, 7, 9, 12, 15, 14, 18, 17, 17, 34, 35, 68, 62, 68, 94, 146, 137, 188, 203, 201, 200, 200, 200, 199, 200, 200, 200, 200, 199, 199, 199, 199, 199, 198, 198, 198, 198, 198, 198, 199, 199, 199, 198, 199, 199, 200, 200, 200, 199, 199, 198, 199, 199, 199, 199, 199, 199, 199, 199, 199, 199, 200, 200, 199, 200, 200, 200, 200, 201, 201, 201, 201, 201, 200, 200, 200, 200, 201, 202, 201, 200, 201, 202, 201, 200, 201, 201, 201, 201, 201, 201, 201, 201, 201, 201, 201, 201, 201, 201, 202, 202, 202, 72, 40, 60, 52, 69, 62, 105, 102, 143, 151, 185, 169, 160, 147, 161, 175, 175, 143, 149, 105, 77, 34, 82, 123, 122, 127, 162, 171, 163, 154, 150, 178, 192, 200, 201, 197, 199, 199, 200, 199, 198, 198, 197, 199, 198, 198, 198, 198, 199, 199, 198, 198, 198, 198, 198, 198, 198, 198, 198, 198, 197, 197, 198, 199, 200, 200, 200, 200, 200, 200, 200, 199, 200, 199, 199, 199, 199, 199, 201, 202, 201, 201, 201, 201, 201, 202, 201, 201, 201, 201, 201, 201, 201, 203, 203, 203, 203, 202, 202, 201, 202, 203, 202, 202, 204, 204, 203, 202, 203, 201, 205, 199, 165, 136, 72, 55, 62, 69, 57, 58, 27, 17, 14, 15, 13, 10, 13, 10, 12, 13, 10, 13, 10, 8, 11, 11, 12, 14, 15, 13, 13, 12, 17, 15, 18, 21, 21, 20, 20, 21, 18, 18, 19, 15, 15, 13, 15, 15, 13, 11, 13, 10, 9, 8, 12, 11, 11, 14, 17, 23, 34, 52, 51, 73, 185, 159, 133, 193, 202, 200, 200, 200, 200, 200, 200, 200, 200, 200, 200, 200, 199, 200, 199, 199, 199, 198, 199, 199, 199, 199, 199, 198, 199, 200, 199, 199, 199, 199, 198, 197, 199, 199, 199, 199, 200, 200, 200, 200, 200, 199, 200, 199, 198, 199, 200, 200, 200, 201, 201, 201, 201, 201, 199, 199, 199, 200, 201, 201, 201, 200, 200, 200, 201, 201, 201, 201, 201, 201, 201, 201, 201, 201, 201, 201, 201, 201, 201, 202, 202, 202, 202, 13, 20, 32, 38, 46, 103, 116, 89, 122, 163, 187, 173, 180, 166, 166, 168, 182, 159, 140, 153, 132, 84, 66, 73, 105, 151, 132, 135, 179, 193, 190, 195, 201, 201, 199, 198, 200, 194, 193, 189, 200, 196, 190, 189, 201, 199, 198, 198, 198, 198, 198, 198, 198, 198, 198, 199, 199, 199, 199, 198, 199, 199, 197, 195, 199, 199, 200, 200, 200, 200, 200, 200, 201, 200, 200, 200, 200, 199, 200, 201, 201, 201, 200, 200, 201, 201, 201, 201, 201, 201, 201, 201, 202, 203, 203, 204, 204, 202, 202, 202, 202, 205, 203, 202, 206, 205, 203, 202, 203, 204, 200, 184, 137, 81, 61, 50, 56, 62, 51, 25, 13, 13, 11, 9, 9, 8, 9, 13, 10, 14, 14, 16, 12, 14, 18, 21, 21, 29, 26, 31, 36, 34, 32, 37, 38, 50, 43, 42, 45, 36, 32, 39, 33, 32, 23, 15, 15, 14, 16, 14, 11, 14, 11, 12, 14, 15, 16, 20, 46, 81, 179, 186, 143, 138, 200, 199, 200, 201, 200, 200, 200, 200, 200, 200, 200, 199, 199, 198, 199, 199, 200, 200, 199, 199, 199, 199, 199, 198, 200, 200, 199, 199, 198, 198, 199, 200, 198, 198, 199, 199, 200, 200, 200, 200, 200, 199, 200, 199, 198, 199, 200, 200, 200, 201, 201, 201, 201, 201, 199, 199, 199, 200, 201, 200, 202, 202, 200, 198, 201, 202, 202, 201, 201, 201, 201, 201, 201, 201, 201, 201, 201, 202, 202, 202, 202, 201, 202, 40, 37, 56, 52, 46, 71, 149, 136, 181, 177, 119, 159, 177, 186, 167, 180, 169, 161, 176, 156, 139, 131, 135, 123, 123, 118, 155, 149, 158, 154, 181, 196, 201, 200, 202, 201, 197, 200, 186, 137, 144, 175, 192, 176, 200, 198, 199, 196, 200, 198, 199, 198, 197, 198, 198, 198, 198, 198, 198, 198, 198, 198, 198, 198, 198, 198, 198, 198, 199, 200, 200, 200, 200, 200, 200, 201, 201, 201, 201, 201, 201, 202, 202, 202, 201, 201, 201, 201, 201, 202, 203, 202, 202, 203, 203, 203, 203, 203, 203, 203, 202, 203, 204, 204, 204, 204, 204, 203, 204, 192, 193, 145, 132, 117, 59, 51, 43, 37, 17, 14, 11, 11, 12, 11, 8, 11, 15, 16, 19, 15, 18, 29, 41, 31, 43, 53, 49, 47, 67, 38, 35, 66, 48, 63, 30, 39, 65, 57, 60, 48, 61, 49, 39, 36, 38, 35, 20, 15, 14, 15, 13, 11, 9, 13, 10, 8, 12, 16, 22, 45, 134, 187, 182, 128, 161, 199, 193, 201, 200, 200, 201, 200, 201, 200, 200, 200, 200, 200, 200, 200, 200, 200, 199, 199, 199, 199, 199, 199, 199, 199, 200, 199, 200, 200, 199, 198, 199, 199, 199, 199, 200, 200, 200, 199, 199, 199, 199, 199, 199, 199, 199, 200, 200, 200, 200, 200, 200, 200, 200, 200, 200, 199, 200, 200, 200, 200, 200, 200, 201, 200, 199, 200, 201, 202, 202, 202, 201, 202, 202, 202, 202, 201, 201, 200, 200, 201, 202, 65, 54, 34, 39, 56, 92, 149, 131, 170, 188, 195, 173, 144, 175, 205, 191, 192, 160, 153, 138, 174, 166, 133, 144, 147, 162, 143, 121, 160, 177, 189, 194, 200, 200, 201, 199, 191, 193, 172, 170, 161, 195, 195, 174, 198, 193, 198, 201, 199, 199, 200, 199, 199, 199, 199, 199, 199, 199, 199, 199, 199, 199, 199, 199, 199, 199, 199, 199, 200, 200, 199, 200, 201, 200, 201, 201, 201, 201, 201, 201, 201, 202, 201, 201, 201, 202, 202, 202, 202, 203, 203, 203, 203, 203, 203, 203, 203, 203, 203, 203, 203, 203, 203, 204, 204, 204, 203, 203, 202, 203, 160, 117, 179, 134, 60, 49, 30, 18, 13, 10, 11, 9, 8, 11, 11, 12, 13, 10, 14, 21, 33, 34, 44, 51, 49, 53, 60, 43, 60, 45, 64, 72, 71, 60, 48, 63, 76, 72, 68, 52, 69, 72, 72, 46, 59, 47, 41, 56, 45, 40, 27, 22, 17, 15, 14, 12, 11, 11, 15, 15, 24, 26, 98, 175, 168, 122, 192, 196, 200, 198, 200, 198, 199, 201, 200, 200, 200, 200, 200, 200, 200, 200, 200, 200, 200, 200, 200, 200, 199, 199, 199, 200, 199, 200, 200, 199, 198, 199, 199, 199, 199, 198, 199, 200, 200, 200, 200, 200, 200, 200, 200, 200, 200, 200, 200, 200, 200, 200, 200, 200, 200, 200, 199, 200, 200, 200, 200, 199, 199, 199, 199, 199, 199, 201, 202, 202, 202, 201, 202, 202, 201, 202, 201, 201, 200, 200, 201, 201, 34, 33, 60, 53, 80, 80, 127, 137, 185, 189, 206, 193, 183, 193, 174, 181, 186, 179, 155, 175, 177, 176, 167, 166, 154, 160, 177, 182, 163, 150, 178, 198, 200, 201, 202, 201, 181, 161, 190, 203, 155, 129, 193, 195, 172, 195, 194, 198, 199, 201, 199, 200, 200, 200, 200, 200, 200, 200, 200, 199, 199, 199, 199, 199, 200, 200, 200, 200, 200, 200, 201, 201, 201, 201, 201, 201, 201, 202, 201, 201, 202, 202, 203, 203, 203, 203, 203, 203, 202, 203, 203, 203, 203, 203, 203, 203, 203, 203, 204, 204, 205, 203, 203, 203, 204, 204, 205, 204, 204, 199, 117, 171, 181, 165, 54, 28, 14, 9, 11, 9, 13, 10, 12, 13, 12, 17, 28, 33, 38, 44, 57, 36, 55, 58, 41, 60, 78, 77, 64, 78, 83, 81, 84, 75, 83, 80, 84, 87, 79, 76, 82, 76, 61, 61, 73, 78, 61, 58, 57, 48, 39, 35, 30, 21, 15, 14, 14, 13, 13, 12, 22, 26, 86, 176, 146, 157, 203, 201, 199, 199, 199, 199, 201, 200, 200, 200, 200, 200, 200, 200, 200, 200, 200, 200, 200, 200, 200, 199, 199, 199, 200, 199, 200, 200, 199, 198, 199, 199, 199, 199, 199, 199, 200, 199, 199, 201, 200, 200, 200, 200, 200, 200, 200, 199, 200, 200, 200, 200, 200, 201, 200, 199, 199, 200, 200, 199, 199, 199, 200, 200, 199, 200, 201, 202, 202, 202, 201, 202, 202, 202, 202, 201, 201, 200, 200, 201, 201, 13, 23, 65, 142, 154, 167, 186, 175, 192, 193, 196, 198, 197, 196, 201, 200, 200, 196, 159, 197, 178, 197, 168, 166, 169, 160, 183, 182, 191, 189, 188, 199, 199, 199, 198, 166, 171, 191, 194, 193, 189, 132, 164, 193, 159, 186, 186, 174, 202, 198, 198, 200, 200, 199, 199, 201, 199, 201, 200, 200, 200, 199, 199, 199, 201, 201, 201, 201, 201, 201, 201, 201, 201, 201, 201, 202, 202, 201, 201, 202, 202, 202, 203, 203, 203, 203, 202, 202, 202, 201, 203, 203, 203, 204, 204, 204, 204, 204, 204, 204, 205, 205, 203, 203, 203, 207, 201, 205, 204, 128, 134, 183, 173, 65, 23, 16, 13, 10, 12, 8, 12, 12, 17, 17, 28, 37, 41, 46, 51, 52, 49, 68, 77, 67, 63, 77, 73, 74, 71, 76, 77, 78, 79, 79, 82, 80, 79, 85, 85, 81, 82, 82, 81, 81, 82, 85, 74, 52, 68, 59, 75, 51, 42, 29, 21, 17, 16, 15, 11, 13, 13, 18, 24, 90, 167, 132, 208, 204, 199, 200, 200, 200, 202, 201, 201, 200, 198, 200, 200, 200, 200, 200, 200, 200, 200, 200, 200, 200, 200, 200, 200, 199, 199, 199, 199, 199, 199, 199, 199, 199, 199, 199, 200, 199, 200, 200, 200, 200, 200, 200, 200, 200, 199, 199, 200, 200, 200, 200, 200, 200, 200, 199, 199, 200, 199, 199, 199, 200, 200, 200, 200, 201, 201, 202, 202, 202, 202, 202, 202, 202, 202, 201, 201, 201, 201, 201, 201, 32, 66, 65, 113, 164, 170, 182, 195, 196, 199, 198, 197, 198, 199, 199, 199, 199, 202, 187, 198, 187, 188, 189, 185, 179, 184, 192, 191, 192, 198, 198, 201, 199, 179, 155, 158, 149, 165, 191, 193, 190, 182, 102, 179, 172, 172, 185, 194, 200, 199, 199, 200, 199, 199, 199, 200, 200, 200, 201, 200, 200, 200, 200, 200, 201, 201, 201, 201, 201, 201, 201, 201, 201, 201, 201, 201, 200, 201, 201, 202, 202, 202, 203, 203, 203, 203, 203, 203, 202, 202, 202, 204, 204, 205, 205, 205, 205, 205, 205, 205, 205, 205, 204, 203, 203, 202, 205, 203, 199, 99, 177, 175, 78, 24, 17, 13, 11, 12, 13, 10, 14, 16, 23, 36, 42, 45, 58, 66, 67, 60, 66, 77, 73, 74, 74, 75, 75, 77, 78, 79, 78, 77, 78, 81, 83, 82, 83, 84, 81, 82, 83, 78, 84, 86, 83, 80, 75, 81, 78, 86, 75, 58, 60, 39, 37, 25, 18, 20, 13, 13, 13, 11, 16, 21, 96, 153, 194, 203, 198, 200, 200, 201, 202, 201, 201, 201, 199, 200, 199, 199, 200, 199, 200, 200, 200, 200, 200, 200, 200, 200, 200, 201, 200, 199, 198, 198, 199, 199, 199, 199, 199, 200, 200, 199, 200, 200, 200, 200, 200, 200, 200, 200, 199, 199, 200, 199, 199, 199, 200, 200, 200, 200, 199, 200, 199, 199, 200, 200, 200, 200, 200, 201, 201, 202, 202, 202, 202, 202, 202, 202, 202, 201, 201, 201, 201, 201, 201, 29, 46, 75, 96, 130, 186, 200, 195, 198, 197, 198, 199, 198, 199, 199, 199, 199, 199, 202, 199, 195, 198, 197, 195, 193, 193, 182, 197, 198, 190, 205, 143, 176, 181, 145, 157, 206, 164, 107, 148, 200, 192, 190, 87, 168, 158, 173, 201, 199, 201, 198, 200, 200, 199, 200, 199, 199, 200, 200, 200, 200, 200, 201, 201, 201, 201, 201, 201, 201, 201, 201, 201, 201, 201, 201, 201, 201, 201, 201, 202, 202, 202, 202, 202, 202, 202, 203, 203, 203, 204, 203, 205, 205, 205, 205, 205, 205, 204, 205, 205, 205, 205, 205, 204, 203, 204, 204, 205, 175, 136, 181, 97, 24, 15, 12, 11, 11, 13, 10, 15, 16, 30, 40, 49, 32, 51, 58, 73, 75, 75, 77, 76, 79, 76, 78, 75, 76, 80, 82, 80, 79, 78, 80, 83, 78, 80, 82, 80, 78, 83, 84, 81, 84, 85, 87, 91, 87, 88, 86, 78, 82, 75, 80, 73, 61, 41, 29, 17, 15, 15, 14, 14, 12, 12, 29, 103, 152, 199, 201, 200, 201, 201, 202, 201, 201, 201, 199, 201, 200, 200, 201, 200, 201, 201, 201, 201, 201, 201, 201, 200, 200, 199, 199, 199, 200, 200, 200, 200, 200, 200, 199, 200, 201, 200, 200, 200, 200, 200, 200, 199, 199, 199, 199, 199, 200, 199, 199, 200, 200, 200, 200, 200, 199, 200, 199, 199, 200, 201, 201, 201, 200, 200, 201, 202, 202, 202, 202, 202, 202, 202, 202, 201, 201, 201, 201, 201, 201, 26, 16, 48, 116, 147, 150, 192, 201, 197, 198, 197, 198, 199, 200, 202, 198, 199, 196, 186, 199, 194, 176, 198, 202, 187, 188, 202, 204, 189, 154, 161, 165, 180, 172, 190, 193, 160, 146, 163, 137, 99, 150, 182, 137, 110, 138, 182, 197, 202, 199, 200, 199, 197, 200, 200, 193, 195, 201, 200, 199, 200, 199, 201, 201, 201, 201, 201, 201, 201, 201, 201, 201, 201, 201, 201, 202, 202, 202, 202, 202, 202, 202, 202, 202, 202, 202, 203, 202, 201, 204, 203, 205, 205, 205, 205, 205, 205, 204, 204, 205, 205, 205, 204, 204, 204, 204, 205, 204, 155, 176, 122, 29, 16, 14, 14, 13, 10, 16, 14, 20, 34, 49, 50, 68, 70, 66, 70, 72, 74, 75, 78, 81, 80, 77, 74, 76, 73, 79, 81, 80, 81, 80, 79, 81, 72, 77, 80, 83, 80, 79, 79, 82, 87, 87, 87, 88, 88, 89, 86, 89, 86, 82, 88, 87, 61, 58, 48, 34, 15, 17, 12, 13, 15, 12, 18, 35, 136, 199, 201, 202, 201, 201, 202, 201, 201, 201, 200, 202, 201, 201, 202, 201, 201, 201, 201, 201, 201, 201, 201, 201, 200, 200, 200, 200, 200, 200, 200, 200, 200, 200, 199, 200, 200, 200, 200, 200, 200, 200, 200, 199, 199, 199, 199, 199, 200, 200, 200, 200, 200, 200, 200, 200, 200, 200, 199, 200, 200, 201, 201, 201, 200, 200, 201, 201, 202, 202, 202, 202, 202, 202, 202, 201, 201, 201, 201, 201, 201, 30, 45, 50, 69, 89, 125, 170, 187, 197, 199, 197, 199, 198, 201, 198, 198, 197, 194, 170, 165, 186, 202, 179, 179, 189, 170, 198, 163, 171, 185, 190, 144, 151, 161, 160, 145, 172, 182, 178, 149, 144, 111, 92, 153, 104, 120, 191, 194, 195, 200, 200, 201, 197, 188, 192, 201, 200, 189, 187, 195, 200, 200, 200, 201, 201, 201, 201, 201, 201, 201, 201, 201, 201, 201, 202, 202, 202, 203, 203, 203, 203, 203, 203, 203, 203, 204, 204, 202, 202, 203, 203, 205, 205, 205, 205, 205, 205, 204, 205, 205, 204, 204, 204, 203, 203, 204, 205, 205, 139, 161, 41, 12, 15, 13, 10, 13, 10, 12, 14, 17, 37, 48, 52, 49, 67, 71, 70, 73, 73, 71, 74, 78, 80, 78, 73, 70, 75, 77, 79, 77, 80, 82, 84, 84, 81, 83, 89, 85, 85, 82, 82, 83, 85, 82, 82, 85, 86, 86, 90, 89, 88, 86, 87, 85, 86, 80, 74, 65, 56, 33, 22, 18, 15, 12, 14, 17, 21, 84, 194, 201, 201, 201, 201, 201, 201, 201, 201, 201, 201, 201, 202, 201, 200, 201, 200, 200, 201, 201, 201, 200, 201, 200, 200, 201, 200, 199, 200, 199, 200, 200, 200, 199, 199, 200, 200, 200, 200, 200, 199, 199, 199, 200, 200, 200, 199, 200, 199, 199, 200, 200, 199, 200, 200, 199, 200, 200, 201, 201, 201, 201, 201, 200, 200, 201, 201, 201, 201, 201, 201, 201, 201, 201, 201, 201, 201, 200, 200, 201, 13, 23, 49, 58, 75, 126, 93, 100, 195, 201, 197, 199, 199, 201, 194, 199, 196, 188, 167, 165, 155, 154, 202, 191, 152, 167, 115, 195, 195, 184, 177, 140, 120, 137, 91, 114, 109, 89, 109, 122, 115, 136, 139, 105, 50, 79, 170, 152, 181, 197, 195, 194, 193, 189, 140, 129, 170, 194, 195, 198, 199, 201, 201, 201, 201, 201, 201, 201, 201, 201, 201, 201, 201, 201, 202, 202, 202, 203, 203, 203, 203, 203, 203, 203, 203, 204, 204, 203, 203, 202, 203, 204, 205, 205, 205, 205, 205, 204, 205, 205, 204, 204, 205, 203, 203, 205, 203, 202, 122, 81, 20, 13, 11, 14, 14, 15, 16, 34, 52, 63, 63, 59, 69, 74, 76, 72, 72, 73, 76, 77, 73, 73, 74, 72, 77, 77, 79, 80, 81, 79, 82, 84, 84, 84, 83, 85, 84, 83, 82, 83, 84, 83, 85, 87, 86, 88, 87, 82, 81, 88, 91, 89, 87, 84, 88, 83, 68, 66, 37, 20, 24, 14, 13, 13, 20, 40, 193, 199, 201, 200, 201, 201, 201, 201, 201, 201, 201, 201, 202, 200, 200, 201, 200, 200, 200, 202, 200, 200, 201, 201, 201, 201, 200, 199, 199, 199, 199, 200, 201, 199, 199, 200, 200, 200, 200, 200, 200, 200, 200, 200, 200, 200, 200, 199, 200, 200, 200, 200, 200, 200, 200, 200, 200, 200, 201, 201, 201, 201, 201, 201, 201, 201, 201, 201, 201, 201, 201, 201, 201, 201, 201, 201, 202, 202, 202, 202, 38, 35, 45, 43, 103, 165, 178, 159, 122, 130, 188, 195, 201, 195, 194, 186, 191, 194, 199, 190, 164, 151, 123, 139, 127, 134, 166, 155, 204, 194, 150, 126, 148, 111, 99, 131, 131, 107, 97, 104, 99, 98, 90, 106, 125, 86, 145, 175, 185, 188, 169, 144, 161, 173, 174, 185, 188, 200, 200, 202, 199, 200, 198, 198, 201, 201, 201, 201, 201, 201, 201, 201, 201, 201, 202, 202, 202, 203, 203, 203, 203, 203, 203, 203, 203, 204, 204, 204, 203, 201, 203, 204, 204, 205, 205, 205, 205, 204, 205, 205, 205, 205, 205, 204, 204, 199, 203, 195, 97, 26, 16, 12, 14, 13, 10, 13, 18, 35, 52, 47, 62, 70, 71, 69, 75, 75, 71, 76, 79, 77, 74, 72, 70, 75, 77, 76, 76, 75, 75, 79, 78, 80, 81, 78, 79, 78, 83, 81, 82, 81, 81, 82, 80, 83, 86, 86, 86, 84, 86, 85, 85, 83, 87, 89, 87, 91, 88, 83, 70, 56, 36, 23, 21, 13, 10, 15, 16, 30, 148, 204, 202, 200, 200, 200, 201, 201, 201, 201, 201, 201, 200, 200, 201, 199, 199, 200, 200, 201, 200, 200, 201, 201, 201, 201, 201, 199, 200, 200, 200, 200, 200, 199, 199, 200, 200, 200, 200, 200, 200, 200, 200, 200, 199, 200, 200, 199, 200, 200, 200, 200, 200, 200, 200, 200, 200, 200, 201, 201, 201, 201, 201, 201, 201, 201, 201, 201, 201, 201, 201, 201, 201, 201, 202, 202, 202, 202, 203, 202, 81, 122, 81, 103, 78, 99, 108, 73, 90, 105, 123, 110, 141, 158, 163, 161, 145, 151, 131, 135, 136, 126, 137, 114, 105, 127, 141, 144, 170, 168, 142, 153, 163, 150, 163, 131, 144, 125, 131, 154, 149, 134, 140, 142, 157, 119, 174, 187, 141, 140, 166, 166, 153, 145, 144, 154, 168, 172, 175, 183, 179, 190, 201, 200, 201, 201, 201, 201, 201, 201, 201, 201, 201, 201, 201, 202, 202, 203, 203, 203, 203, 203, 203, 202, 203, 204, 203, 203, 202, 201, 202, 204, 204, 204, 204, 205, 205, 204, 205, 205, 205, 204, 204, 204, 204, 204, 202, 195, 72, 25, 12, 13, 11, 13, 10, 18, 26, 45, 46, 54, 67, 72, 72, 76, 76, 72, 77, 77, 78, 75, 72, 70, 72, 70, 71, 74, 77, 76, 76, 81, 80, 78, 77, 78, 78, 78, 78, 76, 76, 76, 77, 78, 80, 81, 82, 84, 85, 86, 89, 89, 89, 89, 86, 86, 89, 91, 92, 92, 89, 80, 54, 30, 21, 12, 13, 15, 19, 85, 205, 201, 199, 201, 201, 201, 201, 201, 201, 201, 201, 201, 200, 200, 201, 201, 201, 200, 200, 200, 201, 201, 201, 201, 200, 200, 201, 199, 200, 201, 201, 201, 199, 199, 199, 200, 200, 200, 200, 201, 200, 200, 201, 200, 200, 200, 199, 200, 200, 200, 200, 200, 200, 200, 200, 200, 200, 200, 199, 199, 200, 200, 200, 200, 201, 201, 201, 201, 201, 202, 202, 201, 202, 202, 203, 202, 201, 203, 202, 61, 80, 106, 132, 142, 124, 119, 176, 163, 200, 199, 198, 191, 146, 196, 207, 163, 200, 185, 174, 163, 171, 180, 167, 155, 91, 88, 135, 158, 189, 159, 150, 171, 158, 139, 124, 74, 126, 138, 171, 199, 181, 184, 186, 96, 74, 125, 88, 121, 145, 143, 154, 173, 192, 198, 201, 200, 203, 204, 203, 204, 203, 201, 201, 201, 201, 201, 201, 201, 201, 201, 201, 201, 202, 202, 202, 202, 203, 203, 203, 203, 203, 203, 202, 202, 203, 203, 202, 202, 201, 202, 204, 204, 204, 204, 204, 205, 206, 205, 205, 204, 204, 204, 204, 204, 202, 205, 196, 46, 20, 16, 12, 13, 10, 19, 15, 37, 57, 75, 68, 72, 75, 74, 73, 71, 75, 77, 73, 73, 74, 79, 76, 73, 76, 76, 75, 76, 79, 82, 83, 82, 82, 84, 81, 78, 77, 76, 75, 74, 76, 78, 78, 82, 83, 83, 81, 83, 85, 85, 87, 90, 90, 90, 89, 88, 87, 90, 92, 89, 87, 70, 38, 18, 13, 13, 14, 21, 37, 192, 202, 203, 200, 200, 201, 201, 201, 201, 201, 201, 201, 201, 200, 201, 201, 201, 201, 201, 201, 201, 201, 200, 200, 200, 200, 201, 201, 200, 200, 201, 201, 200, 200, 200, 200, 200, 200, 200, 201, 201, 200, 201, 201, 200, 200, 200, 200, 200, 200, 200, 201, 201, 201, 201, 201, 201, 200, 199, 199, 201, 201, 201, 201, 201, 201, 201, 201, 201, 202, 202, 202, 202, 202, 203, 202, 202, 203, 203, 55, 85, 97, 98, 139, 140, 156, 151, 147, 202, 198, 203, 196, 194, 184, 155, 143, 139, 184, 180, 183, 186, 195, 188, 176, 161, 75, 49, 86, 128, 120, 126, 134, 146, 118, 125, 120, 123, 124, 171, 161, 190, 192, 144, 176, 142, 170, 169, 194, 180, 173, 197, 200, 203, 200, 199, 201, 202, 201, 200, 202, 201, 201, 201, 201, 201, 201, 201, 201, 201, 201, 202, 202, 202, 202, 202, 202, 203, 203, 203, 203, 203, 203, 204, 203, 202, 203, 202, 202, 201, 202, 203, 204, 204, 205, 205, 205, 205, 205, 205, 205, 204, 204, 204, 204, 204, 205, 178, 26, 16, 17, 14, 13, 20, 33, 56, 60, 73, 74, 74, 75, 72, 71, 73, 77, 77, 74, 77, 74, 71, 69, 70, 74, 75, 77, 81, 80, 78, 80, 81, 81, 81, 82, 80, 79, 78, 76, 77, 78, 78, 77, 85, 85, 86, 82, 86, 88, 86, 87, 88, 88, 90, 90, 87, 89, 90, 88, 88, 88, 83, 66, 19, 15, 14, 16, 20, 27, 164, 203, 201, 200, 201, 201, 201, 201, 201, 201, 201, 201, 201, 201, 201, 201, 201, 201, 201, 201, 201, 201, 200, 201, 200, 200, 201, 200, 199, 200, 201, 201, 201, 201, 201, 200, 200, 200, 201, 201, 201, 201, 201, 201, 200, 200, 200, 200, 201, 200, 200, 201, 201, 201, 201, 201, 201, 201, 202, 201, 201, 201, 201, 201, 201, 201, 201, 201, 201, 202, 202, 202, 203, 203, 203, 203, 203, 204, 203, 47, 67, 122, 160, 161, 188, 184, 190, 112, 184, 197, 200, 197, 201, 191, 184, 187, 161, 142, 180, 172, 168, 160, 139, 110, 72, 68, 39, 68, 83, 71, 79, 70, 45, 62, 94, 135, 108, 82, 168, 190, 175, 136, 138, 169, 124, 177, 163, 170, 182, 204, 199, 201, 202, 201, 204, 203, 201, 202, 203, 201, 201, 203, 200, 201, 201, 201, 201, 201, 201, 202, 202, 202, 203, 203, 203, 203, 203, 203, 203, 203, 203, 203, 204, 203, 203, 203, 203, 203, 203, 202, 204, 204, 204, 205, 205, 204, 205, 204, 205, 204, 204, 204, 204, 204, 205, 204, 149, 23, 19, 15, 17, 15, 21, 45, 55, 62, 78, 75, 69, 67, 73, 71, 76, 79, 82, 76, 69, 71, 74, 75, 74, 73, 77, 76, 74, 80, 83, 82, 81, 75, 74, 74, 75, 76, 77, 77, 79, 78, 78, 77, 81, 84, 84, 86, 86, 86, 86, 89, 88, 87, 88, 91, 86, 88, 89, 86, 89, 88, 87, 78, 36, 17, 12, 15, 16, 27, 144, 204, 200, 199, 202, 200, 201, 201, 201, 201, 200, 200, 199, 199, 201, 201, 201, 201, 201, 199, 199, 200, 200, 201, 201, 201, 201, 201, 200, 200, 199, 200, 201, 201, 201, 201, 201, 201, 201, 201, 201, 201, 201, 201, 201, 201, 200, 201, 201, 200, 200, 201, 201, 201, 201, 200, 201, 201, 201, 201, 201, 201, 201, 201, 201, 201, 201, 202, 202, 203, 202, 201, 202, 203, 203, 203, 203, 204, 203, 123, 165, 78, 128, 184, 198, 200, 187, 180, 144, 201, 196, 200, 195, 194, 198, 191, 145, 125, 82, 94, 72, 119, 154, 92, 144, 180, 175, 105, 79, 46, 70, 107, 103, 97, 107, 121, 82, 33, 91, 145, 133, 140, 199, 183, 91, 151, 149, 188, 207, 203, 203, 202, 200, 199, 197, 193, 189, 183, 192, 203, 203, 201, 202, 201, 201, 200, 201, 202, 202, 202, 202, 202, 203, 203, 203, 203, 203, 203, 203, 203, 203, 203, 203, 203, 203, 203, 203, 203, 203, 203, 204, 204, 205, 205, 204, 204, 206, 204, 205, 204, 204, 204, 204, 204, 203, 206, 126, 19, 16, 15, 12, 22, 23, 51, 66, 76, 78, 70, 73, 75, 72, 70, 73, 77, 82, 76, 68, 71, 71, 72, 72, 65, 71, 77, 75, 77, 77, 77, 80, 76, 73, 81, 78, 80, 71, 77, 86, 85, 85, 86, 85, 84, 78, 81, 82, 82, 85, 89, 87, 85, 85, 89, 89, 82, 85, 89, 89, 91, 92, 86, 49, 14, 14, 14, 16, 23, 130, 202, 201, 200, 204, 201, 201, 201, 201, 201, 201, 202, 202, 202, 201, 201, 201, 201, 201, 201, 201, 201, 200, 201, 201, 201, 201, 201, 201, 200, 200, 201, 201, 201, 201, 201, 201, 201, 201, 201, 201, 201, 201, 201, 201, 201, 201, 201, 201, 201, 201, 201, 201, 201, 201, 201, 201, 201, 201, 200, 201, 201, 201, 201, 201, 202, 202, 202, 202, 202, 202, 201, 202, 203, 203, 204, 204, 204, 203, 115, 157, 155, 152, 100, 104, 168, 188, 185, 131, 157, 201, 202, 199, 186, 163, 141, 143, 155, 132, 140, 166, 114, 113, 143, 131, 110, 90, 72, 48, 108, 115, 114, 94, 93, 97, 82, 106, 115, 76, 141, 167, 168, 149, 89, 90, 46, 134, 151, 152, 154, 164, 172, 178, 183, 185, 185, 185, 190, 197, 202, 202, 202, 201, 201, 201, 201, 201, 202, 202, 202, 202, 202, 203, 203, 203, 203, 202, 202, 202, 202, 202, 203, 203, 203, 203, 204, 203, 203, 203, 203, 204, 204, 205, 205, 204, 204, 206, 204, 205, 204, 204, 204, 204, 204, 205, 208, 115, 19, 18, 13, 14, 21, 37, 56, 65, 75, 78, 74, 75, 71, 83, 81, 73, 74, 74, 72, 75, 75, 74, 73, 78, 77, 78, 81, 78, 78, 78, 76, 74, 75, 78, 78, 82, 80, 79, 77, 78, 84, 85, 86, 85, 84, 83, 86, 86, 83, 83, 86, 87, 86, 88, 87, 85, 83, 81, 84, 86, 90, 91, 93, 77, 18, 13, 14, 18, 28, 132, 202, 202, 200, 203, 201, 201, 201, 201, 201, 201, 201, 201, 201, 201, 201, 201, 201, 201, 203, 202, 201, 201, 201, 201, 201, 201, 201, 200, 200, 200, 200, 201, 201, 201, 201, 201, 201, 201, 201, 201, 201, 201, 201, 201, 201, 201, 201, 201, 201, 201, 201, 201, 201, 201, 201, 201, 201, 200, 200, 201, 201, 201, 201, 201, 202, 202, 202, 201, 202, 202, 202, 202, 203, 203, 204, 204, 203, 203, 90, 131, 121, 128, 150, 133, 80, 125, 190, 152, 204, 162, 199, 199, 190, 165, 167, 182, 159, 111, 62, 79, 142, 188, 188, 167, 173, 141, 112, 77, 89, 86, 66, 111, 109, 112, 127, 147, 152, 108, 81, 132, 129, 156, 113, 104, 96, 161, 177, 195, 183, 197, 203, 202, 200, 199, 197, 197, 197, 202, 205, 202, 203, 203, 203, 203, 202, 202, 203, 203, 203, 203, 203, 204, 203, 203, 202, 203, 203, 203, 203, 203, 204, 204, 204, 204, 204, 203, 203, 204, 204, 205, 205, 204, 204, 204, 204, 206, 204, 205, 205, 204, 204, 204, 203, 206, 206, 118, 19, 15, 14, 13, 18, 44, 60, 77, 81, 73, 74, 74, 82, 74, 69, 76, 76, 80, 80, 83, 78, 75, 74, 74, 76, 80, 80, 80, 79, 77, 76, 73, 77, 78, 81, 79, 78, 76, 84, 84, 82, 84, 83, 86, 85, 84, 84, 83, 84, 85, 86, 85, 84, 86, 86, 86, 84, 81, 80, 81, 84, 89, 90, 88, 23, 14, 15, 16, 26, 139, 203, 199, 201, 204, 201, 201, 201, 200, 200, 200, 201, 201, 201, 201, 201, 201, 201, 201, 201, 201, 201, 201, 201, 201, 200, 200, 200, 200, 201, 201, 201, 201, 201, 201, 201, 201, 201, 201, 201, 201, 201, 201, 201, 201, 201, 200, 201, 201, 201, 201, 201, 201, 201, 201, 201, 201, 201, 200, 200, 200, 201, 201, 200, 200, 201, 202, 202, 201, 202, 202, 201, 203, 202, 202, 203, 204, 204, 204, 141, 170, 177, 120, 105, 105, 124, 154, 93, 162, 135, 196, 154, 211, 189, 141, 117, 94, 86, 178, 197, 190, 146, 138, 178, 190, 159, 101, 94, 71, 47, 117, 100, 92, 103, 84, 121, 146, 126, 186, 122, 127, 144, 111, 136, 118, 120, 186, 191, 174, 190, 202, 203, 203, 201, 203, 203, 203, 202, 203, 203, 203, 203, 203, 202, 202, 203, 203, 203, 203, 203, 203, 203, 203, 203, 203, 202, 203, 203, 203, 203, 203, 204, 204, 204, 204, 204, 203, 203, 204, 204, 205, 204, 204, 204, 204, 204, 205, 205, 205, 205, 204, 204, 203, 204, 205, 204, 129, 20, 17, 13, 13, 18, 46, 69, 83, 68, 72, 76, 80, 68, 70, 74, 75, 84, 81, 78, 73, 76, 77, 77, 76, 71, 65, 64, 71, 75, 76, 75, 75, 79, 79, 80, 78, 75, 74, 80, 82, 82, 83, 84, 82, 81, 82, 84, 81, 85, 81, 82, 85, 85, 86, 88, 86, 88, 87, 86, 87, 87, 89, 91, 93, 35, 12, 13, 14, 27, 159, 202, 200, 201, 202, 201, 201, 201, 201, 201, 202, 201, 201, 201, 201, 201, 201, 201, 201, 203, 203, 203, 203, 201, 201, 201, 201, 201, 201, 201, 202, 201, 201, 201, 201, 201, 201, 201, 201, 201, 201, 201, 201, 200, 201, 201, 201, 201, 201, 201, 201, 201, 201, 201, 201, 201, 201, 202, 201, 201, 201, 200, 200, 200, 201, 202, 202, 202, 202, 201, 202, 203, 202, 203, 202, 203, 204, 204, 204, 137, 143, 151, 172, 138, 178, 144, 153, 181, 152, 105, 165, 204, 154, 109, 120, 144, 165, 192, 148, 159, 162, 164, 120, 135, 168, 172, 139, 105, 70, 87, 101, 109, 108, 146, 161, 151, 149, 149, 142, 144, 86, 133, 158, 140, 102, 132, 178, 200, 198, 174, 174, 196, 199, 202, 203, 202, 203, 202, 203, 203, 203, 203, 203, 204, 204, 203, 203, 203, 203, 203, 203, 203, 204, 203, 203, 203, 203, 203, 203, 203, 203, 204, 204, 204, 204, 204, 203, 203, 204, 204, 205, 204, 204, 204, 204, 204, 205, 205, 205, 205, 204, 204, 204, 204, 201, 204, 149, 23, 18, 13, 15, 18, 54, 63, 57, 67, 73, 84, 77, 72, 73, 75, 79, 81, 75, 76, 76, 75, 75, 71, 70, 72, 71, 72, 76, 76, 78, 80, 78, 80, 82, 81, 78, 78, 77, 78, 80, 82, 80, 79, 83, 84, 81, 79, 84, 84, 83, 80, 82, 83, 85, 87, 89, 87, 88, 88, 90, 89, 88, 88, 92, 44, 13, 13, 10, 18, 31, 186, 202, 199, 201, 203, 201, 201, 201, 201, 202, 202, 202, 201, 201, 202, 201, 201, 202, 202, 201, 201, 201, 201, 201, 202, 202, 202, 203, 201, 202, 202, 201, 201, 201, 201, 201, 201, 201, 201, 201, 201, 201, 201, 201, 201, 202, 201, 201, 201, 201, 202, 202, 202, 201, 201, 200, 201, 202, 202, 202, 202, 200, 200, 200, 201, 202, 202, 202, 202, 203, 202, 202, 202, 203, 202, 203, 204, 204, 204, 120, 140, 123, 160, 129, 164, 181, 137, 159, 200, 159, 91, 121, 130, 171, 143, 184, 182, 191, 176, 163, 142, 153, 144, 156, 147, 134, 83, 87, 82, 48, 50, 101, 148, 127, 135, 113, 94, 128, 185, 118, 167, 162, 173, 131, 122, 135, 173, 187, 202, 202, 182, 175, 191, 196, 196, 200, 201, 204, 203, 203, 203, 203, 203, 203, 204, 204, 205, 204, 204, 204, 204, 204, 204, 204, 204, 204, 204, 204, 204, 204, 204, 204, 204, 204, 204, 204, 203, 203, 204, 204, 205, 205, 204, 204, 204, 204, 205, 205, 205, 205, 205, 205, 205, 206, 205, 205, 171, 23, 15, 14, 12, 18, 55, 71, 63, 72, 74, 75, 72, 70, 75, 75, 75, 75, 75, 79, 74, 71, 73, 67, 68, 72, 70, 70, 77, 78, 80, 77, 78, 80, 77, 79, 78, 80, 81, 85, 85, 86, 86, 86, 85, 84, 83, 80, 80, 82, 86, 84, 86, 89, 91, 89, 89, 90, 90, 88, 90, 90, 93, 91, 88, 55, 13, 15, 17, 62, 204, 201, 201, 203, 202, 201, 201, 201, 202, 202, 202, 202, 202, 202, 202, 202, 202, 203, 203, 202, 202, 202, 202, 202, 202, 202, 201, 201, 202, 201, 200, 201, 201, 201, 201, 201, 201, 201, 201, 201, 201, 201, 201, 200, 201, 201, 201, 201, 202, 202, 202, 203, 202, 202, 201, 201, 202, 202, 202, 202, 202, 201, 200, 201, 200, 202, 203, 203, 203, 203, 203, 202, 202, 203, 202, 203, 203, 203, 204, 107, 136, 168, 118, 151, 139, 164, 124, 149, 198, 192, 110, 84, 143, 195, 156, 176, 198, 154, 178, 194, 187, 139, 125, 138, 150, 86, 83, 92, 120, 97, 38, 97, 81, 42, 52, 70, 92, 143, 69, 163, 170, 176, 177, 130, 153, 159, 163, 188, 201, 202, 205, 195, 188, 179, 195, 202, 202, 203, 203, 203, 203, 203, 203, 202, 202, 202, 202, 203, 203, 203, 203, 203, 204, 204, 204, 204, 204, 203, 203, 203, 203, 204, 204, 204, 204, 204, 204, 204, 205, 205, 204, 204, 204, 204, 204, 204, 204, 203, 203, 204, 203, 203, 203, 204, 208, 203, 196, 46, 18, 16, 11, 22, 61, 62, 67, 74, 64, 81, 75, 75, 75, 75, 71, 74, 73, 74, 77, 74, 73, 71, 67, 66, 65, 69, 74, 77, 75, 72, 71, 74, 75, 75, 76, 77, 76, 77, 78, 79, 80, 80, 80, 82, 82, 85, 79, 83, 87, 84, 85, 88, 88, 87, 89, 89, 91, 91, 93, 91, 95, 95, 94, 68, 16, 13, 10, 23, 124, 206, 201, 200, 200, 201, 201, 201, 201, 202, 202, 202, 202, 201, 201, 202, 202, 202, 202, 202, 201, 202, 202, 202, 202, 202, 202, 202, 202, 202, 201, 201, 201, 201, 201, 201, 201, 201, 201, 201, 201, 201, 201, 201, 201, 201, 201, 201, 201, 202, 202, 202, 203, 201, 201, 202, 203, 203, 202, 202, 202, 202, 202, 202, 202, 202, 202, 202, 202, 202, 203, 203, 203, 204, 203, 203, 203, 204, 204, 204, 143, 166, 161, 131, 113, 166, 153, 128, 138, 175, 130, 76, 92, 91, 124, 176, 153, 159, 177, 174, 162, 146, 150, 119, 99, 73, 52, 93, 103, 65, 79, 15, 23, 24, 47, 59, 41, 36, 44, 56, 86, 119, 155, 135, 140, 162, 187, 168, 182, 201, 204, 200, 203, 198, 195, 193, 199, 201, 204, 203, 203, 203, 203, 203, 203, 203, 203, 203, 203, 203, 203, 203, 203, 204, 204, 204, 204, 205, 204, 204, 204, 204, 205, 205, 205, 205, 205, 204, 205, 205, 205, 204, 204, 204, 204, 204, 204, 204, 204, 203, 204, 203, 204, 204, 204, 205, 204, 202, 104, 23, 16, 16, 16, 63, 73, 70, 63, 66, 80, 78, 78, 72, 72, 78, 76, 73, 76, 79, 73, 72, 74, 70, 68, 70, 72, 71, 70, 72, 70, 70, 71, 72, 70, 73, 76, 73, 76, 79, 77, 76, 77, 79, 83, 83, 85, 83, 81, 78, 79, 84, 87, 89, 89, 89, 88, 88, 90, 89, 89, 97, 95, 93, 78, 17, 14, 28, 185, 201, 200, 202, 202, 202, 201, 202, 202, 201, 201, 202, 202, 202, 202, 202, 202, 202, 202, 202, 202, 203, 203, 202, 202, 202, 202, 202, 202, 202, 202, 201, 201, 202, 202, 202, 202, 202, 202, 202, 201, 201, 201, 201, 201, 201, 201, 202, 202, 203, 203, 203, 203, 202, 202, 203, 203, 203, 203, 202, 202, 202, 202, 201, 201, 202, 202, 202, 202, 202, 204, 204, 204, 205, 203, 204, 204, 204, 204, 204, 160, 143, 183, 162, 142, 150, 160, 127, 136, 96, 37, 54, 134, 127, 98, 108, 150, 169, 186, 183, 181, 176, 169, 152, 127, 86, 42, 75, 90, 79, 77, 19, 30, 48, 28, 33, 35, 50, 78, 110, 81, 134, 130, 130, 163, 192, 199, 167, 177, 203, 202, 200, 193, 199, 204, 203, 202, 202, 203, 203, 203, 203, 203, 203, 203, 203, 203, 203, 203, 203, 203, 203, 203, 204, 204, 204, 205, 205, 204, 204, 204, 204, 205, 205, 205, 205, 205, 205, 205, 205, 205, 204, 204, 204, 204, 204, 204, 204, 204, 204, 206, 204, 204, 204, 204, 207, 203, 202, 178, 32, 21, 17, 16, 60, 72, 63, 65, 79, 80, 80, 80, 76, 79, 76, 71, 73, 74, 71, 70, 70, 69, 71, 73, 71, 70, 72, 74, 75, 74, 74, 74, 73, 77, 73, 73, 76, 75, 78, 82, 79, 76, 75, 79, 81, 84, 82, 82, 83, 84, 81, 82, 87, 90, 91, 88, 89, 92, 90, 85, 92, 94, 94, 88, 24, 20, 122, 206, 199, 202, 201, 201,
[truncated: 1,886,513 more chars]
