# Supplementary material for: Analysis of DES Plaintext Recovery Based on BP Neural Network
Source: Hindawi journal article supplement (doi:10.1155/2019/9580862), 2019-11-11
Supplement: f1 [file 9580862.f1.zip › 9580862.f1/plain/plain3]

[37, 107, 84, 61, 71, 89, 93, 92, 86, 85, 76, 85, 77, 87, 79, 57, 69, 101, 72, 67, 68, 70, 60, 41, 77, 89, 60, 75, 78, 75, 83, 68, 75, 88, 65, 71, 64, 80, 64, 72, 62, 104, 74, 59, 59, 81, 66, 72, 91, 156, 158, 158, 195, 157, 196, 219, 180, 218, 193, 185, 200, 188, 229, 212, 199, 217, 244, 222, 185, 145, 157, 143, 139, 141, 147, 153, 155, 157, 161, 155, 142, 161, 152, 157, 157, 155, 164, 164, 162, 155, 165, 176, 172, 206, 160, 198, 194, 210, 158, 213, 214, 202, 194, 220, 206, 206, 191, 209, 193, 192, 234, 203, 227, 208, 215, 210, 202, 211, 211, 201, 188, 218, 204, 221, 193, 216, 225, 215, 177, 197, 219, 213, 200, 211, 224, 204, 191, 209, 214, 195, 210, 184, 235, 212, 199, 204, 213, 200, 199, 203, 212, 205, 204, 181, 206, 213, 222, 186, 164, 230, 196, 194, 211, 222, 197, 193, 189, 230, 210, 171, 184, 229, 199, 206, 215, 224, 237, 205, 176, 210, 191, 188, 190, 184, 222, 194, 177, 176, 216, 193, 188, 191, 217, 189, 192, 187, 223, 184, 205, 187, 207, 207, 190, 190, 202, 207, 187, 196, 208, 206, 180, 184, 204, 221, 185, 186, 176, 221, 194, 184, 205, 222, 208, 166, 183, 234, 190, 173, 201, 205, 189, 204, 180, 205, 194, 175, 169, 199, 219, 175, 173, 186, 178, 171, 198, 191, 196, 183, 210, 191, 187, 193, 158, 124, 141, 129, 66, 109, 95, 77, 107, 91, 90, 81, 98, 82, 77, 84, 79, 86, 93, 60, 58, 102, 60, 62, 65, 64, 62, 63, 59, 79, 56, 69, 71, 81, 76, 69, 67, 73, 61, 83, 62, 67, 76, 84, 70, 87, 72, 71, 58, 72, 64, 72, 91, 127, 159, 154, 183, 157, 172, 214, 188, 216, 187, 193, 208, 205, 228, 220, 217, 194, 195, 170, 150, 127, 145, 143, 150, 144, 147, 149, 157, 159, 153, 150, 145, 154, 148, 165, 155, 152, 166, 180, 156, 165, 185, 195, 164, 215, 169, 219, 188, 188, 203, 215, 198, 195, 199, 207, 214, 199, 191, 212, 194, 190, 223, 202, 237, 200, 202, 215, 211, 204, 209, 205, 212, 214, 187, 220, 214, 197, 193, 228, 184, 194, 223, 216, 214, 192, 224, 201, 203, 194, 202, 202, 207, 200, 226, 203, 213, 208, 204, 201, 209, 217, 199, 203, 193, 203, 202, 203, 205, 206, 186, 221, 205, 207, 178, 206, 208, 213, 197, 210, 207, 187, 200, 212, 206, 216, 216, 231, 239, 213, 195, 196, 162, 192, 210, 188, 201, 189, 202, 190, 205, 189, 187, 189, 189, 188, 195, 192, 203, 197, 184, 199, 196, 203, 208, 186, 188, 203, 192, 198, 208, 197, 161, 208, 206, 210, 187, 189, 193, 205, 187, 188, 216, 184, 218, 178, 180, 207, 186, 195, 187, 195, 184, 201, 176, 194, 186, 175, 172, 198, 215, 163, 182, 190, 187, 159, 175, 210, 201, 191, 196, 207, 188, 175, 180, 171, 186, 170, 143, 151, 91, 80, 126, 92, 108, 83, 97, 92, 80, 68, 85, 90, 85, 57, 64, 71, 56, 79, 53, 63, 59, 72, 66, 64, 71, 70, 64, 85, 73, 71, 69, 60, 61, 82, 67, 57, 73, 76, 61, 66, 57, 71, 63, 74, 69, 77, 88, 99, 152, 161, 161, 149, 189, 202, 203, 216, 153, 217, 224, 219, 209, 191, 199, 155, 152, 144, 154, 151, 142, 140, 154, 141, 141, 154, 163, 154, 148, 149, 155, 141, 152, 161, 162, 160, 167, 196, 167, 184, 198, 200, 177, 213, 191, 232, 183, 178, 235, 214, 192, 193, 201, 212, 195, 216, 196, 210, 201, 186, 224, 213, 218, 200, 197, 213, 219, 200, 203, 201, 224, 204, 209, 199, 232, 197, 172, 234, 196, 197, 218, 215, 215, 192, 222, 199, 225, 200, 199, 198, 222, 203, 209, 198, 225, 212, 195, 200, 210, 220, 200, 204, 188, 224, 208, 194, 202, 223, 211, 206, 212, 211, 195, 197, 189, 236, 201, 200, 192, 209, 231, 195, 206, 228, 202, 235, 242, 234, 196, 178, 160, 225, 220, 200, 185, 195, 244, 181, 199, 187, 208, 195, 182, 197, 212, 191, 201, 189, 214, 203, 187, 199, 233, 192, 182, 196, 202, 209, 192, 193, 187, 226, 201, 193, 209, 201, 187, 189, 190, 216, 200, 173, 217, 209, 179, 182, 188, 236, 182, 180, 184, 219, 177, 183, 179, 198, 185, 192, 190, 179, 205, 185, 191, 177, 205, 205, 198, 193, 209, 194, 194, 160, 212, 197, 171, 191, 189, 216, 113, 109, 137, 92, 120, 102, 106, 108, 96, 72, 96, 80, 68, 62, 71, 60, 63, 79, 60, 65, 78, 59, 77, 65, 84, 74, 65, 86, 66, 70, 73, 56, 74, 68, 68, 67, 66, 60, 61, 77, 57, 63, 71, 91, 71, 66, 77, 91, 138, 164, 157, 148, 199, 202, 206, 228, 144, 218, 205, 190, 169, 146, 156, 138, 151, 148, 154, 145, 146, 142, 148, 141, 146, 152, 163, 156, 151, 150, 158, 147, 155, 152, 177, 175, 174, 188, 200, 197, 198, 187, 209, 190, 206, 219, 189, 198, 217, 214, 194, 202, 196, 212, 181, 231, 195, 195, 199, 197, 222, 209, 192, 209, 207, 200, 206, 214, 207, 190, 208, 199, 238, 190, 221, 210, 186, 217, 192, 206, 216, 211, 206, 200, 219, 209, 216, 219, 208, 209, 219, 188, 209, 205, 218, 207, 194, 203, 200, 210, 212, 208, 206, 206, 213, 201, 216, 195, 202, 197, 206, 197, 220, 202, 174, 227, 195, 211, 181, 221, 218, 196, 210, 214, 211, 218, 233, 225, 177, 193, 176, 230, 186, 201, 207, 196, 215, 173, 203, 191, 206, 190, 191, 198, 204, 180, 214, 172, 239, 169, 196, 192, 219, 177, 202, 202, 194, 203, 179, 188, 199, 210, 188, 193, 212, 190, 177, 197, 191, 203, 199, 182, 202, 202, 187, 198, 205, 215, 191, 171, 192, 208, 184, 184, 176, 208, 177, 183, 182, 200, 197, 174, 184, 202, 222, 182, 193, 202, 226, 179, 202, 172, 204, 190, 154, 187, 186, 209, 181, 165, 155, 134, 101, 113, 124, 109, 102, 96, 97, 77, 73, 85, 85, 84, 55, 53, 85, 73, 99, 63, 73, 80, 75, 65, 64, 78, 69, 67, 74, 69, 78, 62, 63, 77, 72, 62, 78, 84, 79, 70, 78, 94, 66, 49, 75, 96, 141, 151, 161, 162, 178, 222, 198, 210, 178, 159, 158, 129, 138, 142, 153, 148, 156, 142, 137, 134, 152, 144, 140, 143, 156, 148, 156, 163, 159, 158, 162, 160, 170, 163, 187, 191, 194, 170, 217, 208, 207, 185, 225, 192, 199, 206, 213, 219, 188, 205, 201, 212, 202, 192, 205, 220, 193, 192, 192, 227, 207, 189, 196, 206, 218, 197, 199, 212, 219, 191, 205, 203, 241, 197, 202, 199, 208, 196, 196, 218, 227, 202, 211, 189, 235, 200, 207, 218, 224, 220, 196, 200, 213, 207, 198, 203, 207, 223, 199, 202, 222, 212, 226, 184, 204, 222, 204, 186, 175, 205, 203, 188, 183, 213, 198, 201, 195, 226, 194, 218, 202, 204, 211, 198, 211, 244, 243, 207, 187, 188, 179, 194, 163, 199, 215, 198, 144, 208, 203, 197, 189, 198, 198, 174, 196, 179, 217, 183, 210, 185, 208, 186, 204, 162, 208, 226, 206, 187, 216, 194, 189, 217, 182, 204, 206, 191, 190, 209, 182, 185, 195, 174, 217, 165, 191, 202, 195, 174, 192, 221, 202, 162, 223, 188, 209, 194, 195, 172, 188, 212, 193, 181, 175, 197, 193, 193, 191, 194, 185, 200, 218, 173, 185, 190, 199, 149, 216, 156, 209, 162, 183, 226, 148, 157, 105, 97, 81, 106, 91, 138, 103, 102, 133, 92, 50, 90, 77, 82, 79, 81, 89, 93, 63, 74, 78, 70, 94, 73, 69, 104, 64, 68, 67, 74, 74, 73, 68, 67, 99, 72, 66, 74, 74, 68, 99, 102, 154, 171, 146, 193, 213, 227, 167, 142, 148, 126, 139, 152, 154, 160, 154, 150, 161, 155, 154, 152, 158, 150, 152, 153, 162, 159, 156, 163, 180, 165, 182, 165, 201, 181, 172, 202, 219, 203, 194, 195, 230, 199, 224, 198, 195, 217, 223, 212, 194, 242, 216, 210, 212, 221, 211, 221, 196, 218, 201, 216, 210, 196, 232, 205, 229, 215, 218, 207, 205, 218, 206, 208, 234, 201, 214, 204, 217, 207, 196, 207, 224, 210, 198, 206, 238, 182, 222, 206, 234, 191, 204, 224, 204, 200, 218, 208, 212, 221, 213, 198, 201, 198, 216, 202, 186, 218, 209, 236, 193, 217, 199, 215, 187, 214, 217, 193, 200, 230, 219, 192, 214, 215, 189, 232, 181, 240, 236, 198, 187, 231, 171, 206, 194, 195, 201, 163, 186, 224, 202, 206, 205, 228, 209, 163, 214, 200, 211, 171, 226, 217, 212, 196, 229, 174, 224, 224, 192, 190, 201, 202, 229, 182, 208, 231, 215, 197, 162, 215, 202, 211, 172, 247, 176, 192, 215, 244, 178, 178, 183, 217, 200, 212, 175, 226, 177, 202, 200, 187, 173, 220, 192, 168, 188, 188, 198, 182, 220, 217, 231, 175, 213, 153, 197, 186, 215, 169, 193, 162, 206, 183, 158, 146, 213, 196, 202, 197, 167, 172, 94, 107, 95, 84, 55, 87, 97, 85, 91, 77, 114, 102, 79, 75, 81, 80, 73, 60, 53, 92, 78, 66, 89, 76, 61, 72, 81, 82, 83, 70, 84, 71, 75, 86, 115, 112, 140, 145, 178, 203, 236, 200, 185, 135, 106, 145, 143, 159, 137, 159, 158, 150, 140, 138, 155, 154, 153, 134, 152, 146, 147, 164, 182, 169, 152, 168, 175, 181, 181, 183, 200, 202, 173, 192, 197, 202, 193, 212, 219, 196, 166, 217, 186, 229, 206, 179, 193, 216, 220, 193, 199, 208, 204, 181, 202, 217, 191, 174, 206, 199, 221, 185, 197, 204, 204, 193, 189, 217, 198, 213, 184, 198, 223, 206, 201, 200, 233, 169, 219, 208, 200, 233, 194, 227, 210, 223, 207, 202, 221, 203, 209, 196, 222, 206, 217, 186, 211, 206, 202, 153, 172, 224, 196, 206, 194, 207, 209, 189, 210, 179, 231, 196, 166, 207, 200, 198, 189, 227, 190, 214, 175, 224, 177, 229, 248, 198, 198, 189, 195, 187, 202, 182, 203, 159, 238, 174, 191, 174, 220, 173, 191, 198, 163, 200, 205, 184, 212, 210, 202, 198, 209, 182, 204, 171, 207, 207, 197, 166, 198, 206, 187, 172, 196, 206, 198, 177, 197, 187, 200, 159, 233, 178, 172, 233, 193, 181, 213, 199, 186, 208, 189, 195, 194, 194, 181, 192, 209, 179, 188, 171, 204, 202, 188, 170, 181, 194, 194, 214, 174, 201, 195, 168, 202, 174, 195, 190, 193, 194, 188, 167, 189, 208, 160, 165, 198, 245, 159, 207, 130, 122, 127, 83, 81, 69, 90, 81, 111, 90, 108, 85, 121, 147, 110, 138, 96, 102, 90, 87, 74, 66, 52, 64, 77, 83, 91, 98, 127, 122, 124, 124, 149, 136, 130, 107, 118, 144, 127, 122, 116, 148, 153, 121, 149, 154, 148, 143, 134, 145, 163, 146, 141, 132, 144, 147, 163, 155, 152, 154, 162, 154, 188, 167, 192, 191, 216, 177, 209, 184, 211, 220, 202, 186, 195, 211, 204, 225, 198, 197, 214, 222, 209, 227, 238, 186, 210, 190, 217, 207, 207, 193, 213, 203, 198, 218, 215, 202, 211, 211, 193, 214, 192, 223, 213, 219, 226, 222, 198, 210, 207, 196, 177, 200, 233, 200, 211, 197, 239, 175, 231, 204, 217, 205, 217, 247, 172, 215, 207, 200, 190, 245, 186, 190, 197, 228, 213, 178, 234, 191, 194, 219, 173, 248, 204, 222, 209, 216, 203, 190, 190, 241, 212, 183, 218, 231, 227, 198, 216, 206, 238, 239, 225, 208, 203, 174, 166, 212, 186, 175, 195, 221, 182, 174, 182, 197, 214, 162, 218, 218, 176, 194, 191, 200, 205, 183, 191, 210, 220, 172, 210, 196, 210, 195, 189, 204, 183, 237, 194, 209, 192, 233, 192, 191, 199, 196, 182, 216, 190, 218, 189, 189, 228, 175, 212, 179, 210, 236, 207, 181, 195, 212, 182, 214, 201, 164, 218, 206, 202, 175, 183, 218, 196, 203, 219, 187, 209, 148, 224, 181, 182, 206, 243, 173, 172, 180, 222, 167, 207, 167, 208, 199, 173, 193, 199, 199, 178, 208, 201, 156, 216, 215, 165, 100, 115, 127, 39, 74, 56, 64, 71, 121, 72, 81, 102, 91, 111, 107, 81, 93, 104, 91, 105, 112, 133, 111, 90, 79, 89, 101, 105, 134, 140, 153, 141, 151, 178, 148, 144, 156, 151, 142, 161, 167, 160, 160, 184, 153, 151, 158, 190, 161, 142, 160, 198, 183, 186, 229, 216, 197, 210, 219, 225, 203, 230, 207, 221, 198, 185, 216, 198, 229, 195, 202, 180, 223, 238, 192, 206, 217, 211, 240, 159, 230, 195, 219, 154, 234, 182, 185, 197, 215, 206, 195, 202, 224, 200, 217, 198, 216, 204, 204, 195, 220, 206, 194, 216, 200, 209, 195, 230, 217, 210, 204, 227, 180, 215, 212, 202, 200, 222, 221, 209, 202, 206, 211, 223, 218, 215, 190, 218, 211, 193, 194, 193, 208, 203, 189, 213, 227, 219, 191, 213, 206, 228, 133, 228, 213, 193, 179, 216, 184, 220, 173, 199, 219, 209, 247, 237, 214, 198, 170, 194, 198, 203, 174, 189, 214, 196, 202, 195, 193, 197, 171, 175, 227, 164, 195, 180, 206, 203, 202, 198, 203, 213, 182, 211, 191, 220, 198, 193, 191, 177, 225, 196, 186, 200, 201, 229, 176, 213, 214, 194, 183, 200, 211, 180, 185, 212, 198, 206, 181, 207, 223, 185, 215, 163, 211, 188, 192, 205, 178, 217, 198, 188, 184, 197, 190, 189, 187, 201, 196, 174, 156, 199, 175, 159, 196, 218, 210, 169, 177, 205, 207, 162, 170, 198, 194, 168, 167, 185, 186, 182, 184, 196, 195, 194, 168, 185, 200, 171, 216, 178, 159, 139, 125, 108, 89, 81, 60, 72, 77, 85, 79, 67, 63, 88, 88, 67, 95, 100, 92, 91, 100, 90, 111, 104, 131, 126, 137, 172, 159, 157, 146, 139, 153, 153, 149, 155, 153, 163, 153, 175, 159, 182, 178, 180, 163, 198, 206, 194, 189, 208, 213, 209, 189, 210, 208, 210, 186, 234, 192, 215, 185, 207, 209, 201, 229, 191, 219, 213, 198, 213, 197, 221, 210, 229, 203, 196, 218, 199, 202, 198, 216, 197, 198, 192, 220, 208, 205, 193, 210, 202, 206, 222, 200, 223, 192, 193, 219, 221, 198, 196, 193, 209, 211, 193, 207, 223, 206, 205, 200, 204, 233, 195, 189, 221, 209, 204, 195, 221, 216, 213, 214, 214, 211, 206, 188, 205, 232, 188, 197, 202, 205, 209, 204, 178, 228, 199, 184, 202, 215, 185, 195, 192, 220, 189, 207, 196, 206, 206, 204, 191, 244, 237, 201, 175, 202, 202, 172, 180, 192, 209, 191, 187, 185, 206, 190, 179, 198, 206, 198, 175, 189, 199, 194, 206, 179, 220, 197, 193, 201, 201, 201, 210, 192, 205, 212, 192, 180, 194, 206, 188, 164, 214, 195, 185, 167, 206, 200, 203, 179, 190, 213, 184, 187, 197, 200, 206, 199, 184, 223, 201, 196, 194, 174, 214, 196, 201, 199, 199, 178, 199, 161, 213, 185, 192, 200, 191, 165, 189, 173, 191, 210, 192, 183, 174, 163, 181, 213, 180, 179, 188, 184, 189, 176, 186, 185, 190, 189, 197, 185, 204, 179, 179, 197, 169, 197, 207, 194, 184, 178, 171, 153, 122, 137, 145, 129, 122, 109, 113, 131, 123, 105, 106, 129, 123, 97, 123, 136, 110, 133, 126, 137, 130, 132, 152, 152, 165, 147, 141, 176, 159, 165, 178, 181, 209, 148, 204, 166, 212, 204, 189, 180, 226, 213, 211, 198, 215, 210, 206, 213, 224, 208, 223, 197, 235, 198, 206, 212, 226, 196, 215, 207, 204, 228, 201, 191, 184, 227, 222, 198, 202, 213, 205, 209, 198, 222, 203, 211, 208, 220, 194, 198, 205, 221, 212, 214, 191, 209, 224, 216, 197, 202, 198, 227, 189, 188, 201, 205, 219, 187, 207, 189, 224, 201, 206, 218, 200, 236, 195, 207, 225, 194, 184, 217, 202, 206, 222, 205, 212, 199, 198, 195, 210, 237, 179, 201, 204, 214, 218, 199, 180, 239, 202, 198, 213, 241, 173, 207, 202, 215, 170, 208, 201, 219, 200, 209, 181, 246, 239, 201, 171, 218, 206, 185, 192, 192, 221, 191, 198, 176, 214, 191, 190, 203, 209, 190, 201, 205, 190, 180, 166, 192, 207, 192, 188, 208, 193, 203, 203, 186, 199, 217, 218, 189, 185, 219, 195, 183, 199, 212, 192, 169, 212, 228, 208, 169, 198, 229, 189, 208, 179, 212, 206, 199, 180, 233, 188, 211, 199, 174, 218, 201, 209, 191, 204, 181, 197, 176, 216, 194, 203, 207, 196, 192, 172, 173, 222, 194, 195, 158, 203, 178, 176, 191, 215, 195, 190, 182, 195, 188, 184, 175, 185, 185, 188, 189, 200, 189, 171, 183, 180, 178, 187, 171, 174, 190, 193, 207, 165, 185, 207, 189, 155, 168, 165, 183, 171, 163, 171, 163, 163, 152, 168, 151, 132, 152, 165, 154, 166, 167, 168, 170, 169, 178, 155, 205, 188, 164, 207, 205, 213, 187, 213, 167, 220, 203, 198, 191, 220, 211, 200, 207, 216, 198, 209, 212, 224, 199, 212, 195, 234, 197, 197, 219, 225, 206, 223, 191, 197, 230, 200, 189, 180, 227, 217, 201, 199, 216, 194, 202, 205, 230, 199, 226, 209, 220, 200, 197, 180, 227, 235, 208, 184, 208, 232, 222, 178, 200, 204, 225, 196, 180, 222, 206, 206, 202, 200, 203, 202, 195, 224, 227, 200, 218, 209, 215, 219, 189, 190, 223, 193, 191, 217, 212, 210, 195, 202, 201, 200, 213, 167, 219, 200, 194, 208, 217, 193, 210, 204, 199, 220, 195, 188, 212, 216, 193, 177, 204, 198, 203, 189, 200, 198, 240, 240, 219, 187, 206, 185, 183, 208, 183, 197, 198, 201, 191, 200, 192, 207, 192, 182, 197, 217, 204, 175, 184, 188, 210, 183, 193, 200, 206, 194, 188, 205, 197, 178, 190, 218, 212, 171, 193, 208, 200, 196, 198, 203, 192, 190, 233, 206, 179, 193, 204, 207, 225, 181, 201, 194, 215, 194, 208, 175, 224, 201, 172, 209, 198, 220, 180, 187, 193, 182, 197, 198, 195, 208, 211, 176, 210, 169, 173, 212, 166, 212, 178, 188, 179, 190, 193, 208, 189, 193, 179, 188, 187, 198, 179, 177, 189, 191, 183, 194, 189, 173, 190, 183, 179, 166, 171, 170, 193, 177, 195, 184, 194, 196, 185, 176, 192, 184, 195, 190, 198, 199, 182, 187, 204, 200, 176, 164, 174, 198, 188, 199, 200, 195, 185, 190, 205, 187, 204, 219, 170, 232, 211, 195, 207, 218, 178, 208, 205, 204, 198, 212, 195, 204, 211, 206, 193, 225, 204, 201, 192, 211, 191, 219, 190, 193, 208, 222, 210, 227, 195, 193, 215, 199, 199, 207, 208, 203, 216, 204, 210, 181, 206, 209, 214, 209, 236, 215, 198, 197, 215, 178, 219, 227, 198, 197, 203, 223, 220, 182, 195, 205, 213, 222, 175, 233, 205, 193, 222, 204, 213, 202, 203, 232, 213, 216, 216, 213, 205, 205, 192, 201, 212, 200, 193, 207, 213, 213, 205, 202, 209, 186, 201, 167, 229, 202, 188, 193, 238, 199, 195, 205, 200, 213, 186, 203, 214, 220, 193, 190, 225, 200, 198, 197, 206, 215, 233, 241, 235, 200, 196, 168, 177, 203, 185, 178, 203, 188, 204, 185, 198, 211, 191, 180, 200, 213, 184, 178, 199, 235, 203, 178, 203, 204, 196, 204, 183, 200, 203, 178, 184, 192, 219, 184, 183, 196, 210, 205, 183, 189, 197, 170, 227, 201, 195, 187, 172, 217, 222, 199, 178, 189, 222, 204, 187, 195, 213, 201, 185, 196, 191, 217, 191, 187, 195, 189, 190, 192, 189, 214, 203, 177, 204, 186, 179, 190, 173, 219, 215, 161, 161, 201, 198, 206, 176, 186, 180, 178, 195, 204, 199, 168, 202, 202, 184, 192, 193, 191, 190, 174, 192, 157, 199, 188, 191, 172, 175, 190, 198, 175, 166, 196, 187, 182, 197, 193, 193, 189, 200, 200, 203, 201, 199, 205, 184, 206, 209, 204, 207, 190, 196, 214, 214, 211, 195, 226, 184, 235, 213, 186, 204, 217, 207, 193, 211, 218, 188, 222, 174, 222, 209, 199, 197, 231, 205, 195, 192, 225, 195, 201, 189, 197, 212, 211, 201, 213, 216, 207, 196, 188, 212, 227, 204, 189, 225, 194, 213, 174, 215, 203, 206, 208, 237, 222, 181, 186, 224, 200, 213, 205, 200, 210, 201, 198, 222, 192, 202, 197, 206, 217, 174, 220, 208, 195, 199, 223, 203, 217, 216, 222, 193, 219, 231, 192, 192, 195, 210, 179, 205, 213, 209, 210, 193, 223, 206, 198, 217, 184, 212, 171, 218, 206, 208, 198, 235, 200, 212, 205, 201, 197, 219, 191, 215, 211, 203, 190, 230, 201, 200, 209, 223, 207, 239, 244, 232, 194, 199, 192, 212, 194, 198, 192, 201, 201, 200, 194, 205, 199, 199, 201, 199, 192, 184, 193, 192, 194, 196, 191, 212, 186, 174, 215, 194, 179, 183, 202, 210, 172, 221, 216, 211, 174, 227, 224, 188, 184, 203, 193, 207, 211, 202, 184, 177, 222, 218, 194, 170, 195, 216, 168, 222, 195, 193, 195, 207, 187, 185, 211, 213, 205, 190, 211, 179, 199, 189, 226, 192, 195, 191, 198, 187, 179, 197, 214, 216, 174, 164, 200, 168, 234, 182, 185, 191, 164, 206, 185, 196, 159, 197, 192, 208, 171, 187, 212, 186, 179, 205, 167, 204, 186, 172, 190, 190, 194, 185, 191, 197, 187, 182, 176, 195, 191, 182, 171, 212, 205, 167, 185, 193, 222, 173, 191, 207, 192, 198, 170, 215, 202, 201, 198, 204, 214, 181, 201, 216, 184, 215, 185, 217, 197, 194, 220, 160, 234, 184, 204, 205, 209, 186, 199, 199, 218, 186, 205, 190, 198, 199, 196, 210, 202, 199, 188, 221, 215, 200, 186, 205, 206, 214, 184, 214, 192, 209, 178, 206, 194, 216, 190, 227, 217, 186, 180, 213, 195, 223, 205, 199, 202, 204, 194, 215, 196, 205, 183, 208, 189, 185, 203, 212, 196, 176, 215, 196, 210, 210, 219, 187, 207, 226, 176, 195, 192, 225, 164, 208, 216, 211, 208, 192, 220, 197, 201, 211, 196, 215, 172, 195, 200, 215, 205, 209, 197, 220, 199, 189, 179, 227, 171, 201, 204, 203, 191, 196, 197, 194, 207, 211, 202, 233, 236, 214, 171, 188, 194, 213, 172, 208, 190, 172, 216, 186, 184, 196, 179, 195, 208, 190, 167, 191, 219, 168, 165, 191, 216, 208, 174, 160, 211, 183, 169, 180, 197, 200, 169, 199, 194, 199, 187, 178, 217, 182, 188, 202, 224, 161, 217, 188, 173, 206, 230, 185, 181, 182, 187, 206, 148, 213, 206, 174, 172, 181, 176, 194, 194, 212, 177, 203, 155, 201, 196, 202, 202, 193, 185, 192, 198, 182, 161, 186, 211, 188, 144, 169, 203, 174, 196, 174, 207, 200, 164, 176, 213, 176, 176, 202, 188, 174, 173, 191, 200, 202, 170, 172, 178, 207, 157, 164, 190, 184, 184, 163, 188, 204, 159, 161, 178, 197, 176, 160, 152, 213, 187, 159, 203, 197, 196, 176, 185, 230, 188, 182, 163, 202, 202, 165, 185, 199, 203, 185, 177, 218, 210, 191, 179, 177, 222, 188, 195, 173, 230, 214, 189, 217, 222, 198, 174, 204, 223, 194, 186, 188, 207, 222, 181, 173, 233, 198, 214, 181, 205, 208, 188, 197, 190, 215, 186, 196, 208, 198, 190, 186, 199, 223, 193, 198, 215, 202, 196, 196, 176, 231, 221, 191, 196, 211, 212, 206, 197, 192, 181, 217, 177, 201, 218, 234, 196, 211, 209, 198, 212, 207, 238, 187, 248, 213, 208, 217, 200, 186, 234, 213, 199, 195, 195, 241, 187, 204, 209, 199, 206, 200, 199, 192, 200, 211, 206, 205, 202, 207, 207, 210, 198, 243, 208, 188, 211, 217, 213, 207, 223, 223, 211, 197, 235, 241, 251, 234, 189, 195, 182, 191, 193, 195, 195, 214, 194, 183, 210, 213, 200, 215, 227, 215, 189, 202, 225, 203, 191, 207, 211, 207, 230, 181, 188, 222, 219, 200, 213, 252, 187, 211, 216, 237, 165, 245, 200, 225, 189, 226, 226, 192, 232, 205, 192, 230, 254, 168, 232, 208, 226, 207, 226, 186, 240, 219, 219, 235, 211, 198, 221, 229, 239, 205, 210, 206, 222, 219, 233, 199, 242, 208, 188, 203, 206, 219, 195, 209, 227, 208, 166, 235, 248, 214, 200, 194, 229, 218, 242, 183, 209, 236, 193, 220, 235, 212, 220, 191, 219, 213, 233, 189, 206, 223, 221, 195, 225, 217, 204, 212, 206, 235, 228, 215, 214, 242, 212, 222, 230, 203, 242, 185, 225, 217, 227, 204, 222, 247, 230, 237, 228, 230, 214, 239, 214, 229, 239, 228, 231, 222, 218, 238, 209, 226, 242, 235, 237, 210, 225, 234, 227, 237, 248, 213, 250, 239, 243, 218, 244, 235, 232, 233, 231, 253, 235, 233, 224, 231, 216, 240, 244, 237, 222, 231, 238, 235, 230, 226, 239, 250, 207, 254, 236, 238, 235, 231, 225, 250, 248, 225, 230, 229, 253, 244, 237, 213, 227, 252, 223, 233, 246, 244, 243, 238, 212, 244, 229, 242, 241, 239, 255, 249, 241, 239, 243, 246, 248, 249, 251, 224, 236, 250, 247, 234, 247, 219, 236, 236, 248, 247, 246, 243, 251, 250, 254, 252, 250, 238, 239, 233, 243, 248, 247, 252, 242, 244, 225, 247, 244, 224, 230, 40, 222, 1, 56, 139, 1, 4, 49, 8, 3, 16, 128, 2, 24, 128, 2, 34, 128, 128, 12, 2, 3, 3, 4, 5, 5, 13, 10, 14, 18, 17, 20, 22, 20, 22, 26, 27, 32, 25, 26, 27, 21, 26, 24, 23, 30, 27, 30, 30, 29, 25, 26, 25, 23, 20, 22, 23, 23, 25, 23, 22, 24, 18, 19, 18, 21, 23, 29, 24, 22, 33, 34, 35, 36, 38, 40, 40, 40, 44, 42, 43, 43, 46, 50, 55, 48, 46, 50, 47, 48, 52, 56, 53, 61, 61, 51, 57, 57, 57, 56, 65, 63, 62, 60, 61, 61, 69, 71, 71, 71, 68, 67, 69, 70, 72, 74, 71, 80, 77, 76, 75, 83, 79, 78, 81, 77, 81, 85, 87, 88, 89, 87, 94, 101, 97, 106, 101, 97, 92, 94, 98, 100, 92, 90, 96, 103, 105, 99, 104, 101, 101, 99, 105, 98, 103, 101, 104, 102, 99, 94, 98, 98, 97, 97, 97, 94, 98, 100, 100, 104, 100, 97, 97, 96, 92, 91, 93, 93, 92, 96, 94, 95, 94, 93, 90, 88, 91, 95, 88, 90, 91, 88, 92, 93, 87, 90, 90, 83, 87, 90, 86, 85, 82, 82, 84, 81, 77, 75, 75, 80, 69, 70, 67, 69, 69, 67, 66, 62, 61, 64, 53, 63, 62, 67, 64, 66, 63, 66, 61, 64, 57, 61, 64, 58, 55, 53, 52, 48, 47, 48, 50, 53, 50, 50, 52, 49, 47, 51, 53, 49, 46, 38, 39, 38, 36, 41, 47, 44, 44, 46, 44, 38, 38, 36, 36, 36, 37, 37, 35, 42, 36, 33, 32, 38, 32, 29, 31, 2, 2, 3, 3, 5, 4, 9, 13, 16, 18, 20, 22, 21, 22, 27, 28, 31, 29, 24, 29, 23, 25, 24, 26, 29, 28, 28, 30, 34, 29, 31, 26, 23, 24, 24, 20, 22, 26, 21, 22, 23, 19, 21, 18, 25, 24, 21, 22, 26, 28, 29, 32, 33, 39, 39, 46, 50, 43, 42, 41, 41, 49, 48, 53, 53, 46, 45, 47, 51, 52, 61, 57, 55, 59, 54, 59, 59, 54, 57, 58, 63, 64, 64, 62, 60, 71, 70, 71, 68, 70, 69, 72, 66, 71, 71, 71, 76, 76, 77, 78, 80, 78, 79, 78, 78, 81, 84, 85, 85, 86, 86, 87, 90, 92, 100, 104, 98, 94, 93, 93, 98, 91, 95, 98, 98, 98, 100, 97, 95, 96, 94, 98, 97, 100, 96, 98, 100, 99, 99, 102, 96, 98, 94, 101, 96, 96, 102, 100, 102, 98, 97, 103, 101, 94, 93, 94, 93, 95, 95, 94, 95, 96, 97, 97, 95, 99, 94, 88, 90, 93, 90, 92, 92, 90, 91, 83, 86, 87, 88, 89, 90, 86, 86, 82, 78, 78, 77, 78, 71, 71, 71, 70, 70, 70, 71, 69, 66, 63, 64, 57, 63, 63, 65, 63, 69, 68, 66, 65, 62, 60, 63, 59, 55, 54, 54, 45, 47, 46, 48, 51, 53, 52, 55, 52, 54, 49, 53, 49, 48, 44, 42, 43, 39, 44, 48, 50, 51, 45, 41, 41, 40, 39, 37, 37, 34, 39, 38, 39, 38, 37, 35, 36, 35, 33, 32, 29, 2, 2, 2, 3, 5, 2, 7, 13, 10, 16, 19, 19, 22, 21, 24, 25, 30, 29, 32, 26, 27, 23, 25, 27, 30, 33, 30, 28, 26, 28, 31, 30, 28, 28, 28, 27, 23, 21, 25, 22, 22, 20, 21, 22, 23, 24, 26, 26, 21, 21, 26, 27, 26, 28, 38, 40, 44, 46, 46, 46, 44, 41, 45, 48, 50, 55, 52, 46, 46, 53, 54, 59, 54, 57, 60, 57, 60, 61, 56, 60, 57, 63, 65, 67, 66, 61, 67, 71, 71, 66, 71, 72, 69, 69, 72, 68, 71, 73, 74, 74, 76, 77, 73, 79, 76, 77, 80, 82, 85, 87, 88, 85, 87, 88, 91, 97, 105, 96, 96, 94, 91, 97, 91, 96, 97, 98, 96, 99, 95, 93, 95, 94, 95, 97, 94, 94, 95, 98, 98, 101, 99, 99, 98, 95, 97, 99, 97, 96, 101, 103, 103, 97, 100, 101, 97, 94, 97, 97, 97, 95, 96, 97, 98, 99, 95, 94, 96, 91, 90, 91, 94, 91, 93, 93, 88, 89, 87, 90, 90, 91, 86, 85, 88, 90, 84, 82, 80, 79, 76, 70, 72, 68, 67, 66, 67, 69, 69, 66, 61, 66, 59, 63, 61, 62, 67, 70, 68, 64, 62, 55, 60, 55, 58, 57, 53, 54, 49, 45, 45, 49, 53, 56, 55, 56, 56, 58, 52, 51, 45, 46, 49, 48, 47, 40, 48, 50, 50, 52, 45, 41, 44, 45, 39, 37, 41, 36, 37, 35, 35, 33, 36, 33, 36, 34, 33, 33, 31, 2, 2, 2, 3, 5, 2, 4, 7, 15, 19, 20, 23, 21, 25, 25, 30, 28, 34, 29, 29, 25, 28, 28, 28, 29, 33, 29, 25, 30, 31, 26, 28, 30, 30, 27, 28, 24, 24, 25, 21, 17, 21, 19, 22, 24, 23, 29, 26, 23, 23, 25, 23, 25, 35, 37, 42, 39, 46, 47, 42, 42, 46, 47, 51, 55, 55, 52, 46, 52, 51, 53, 56, 58, 58, 54, 55, 58, 57, 59, 64, 65, 69, 66, 65, 63, 65, 72, 72, 73, 73, 71, 70, 70, 72, 71, 75, 70, 76, 75, 75, 76, 74, 73, 72, 73, 77, 79, 84, 85, 90, 91, 91, 88, 89, 95, 104, 95, 95, 93, 90, 95, 92, 94, 93, 96, 97, 98, 102, 92, 91, 97, 90, 95, 95, 96, 93, 96, 97, 102, 98, 101, 96, 97, 97, 99, 100, 99, 103, 103, 101, 97, 97, 99, 101, 95, 96, 99, 98, 96, 94, 99, 96, 95, 91, 94, 93, 93, 94, 92, 91, 89, 92, 94, 93, 90, 95, 89, 87, 88, 85, 83, 88, 89, 85, 84, 80, 78, 77, 75, 71, 68, 69, 70, 69, 69, 66, 65, 66, 67, 56, 62, 63, 62, 69, 68, 68, 60, 59, 54, 56, 55, 54, 55, 55, 54, 47, 46, 49, 54, 54, 55, 60, 56, 57, 54, 54, 49, 47, 46, 51, 50, 50, 44, 53, 51, 51, 48, 44, 41, 42, 43, 42, 40, 43, 37, 35, 37, 34, 34, 37, 35, 35, 32, 30, 34, 33, 2, 2, 2, 3, 5, 2, 4, 5, 12, 18, 21, 23, 21, 22, 25, 28, 29, 34, 33, 27, 25, 31, 31, 29, 29, 30, 28, 26, 26, 32, 28, 25, 29, 32, 27, 27, 28, 24, 27, 26, 25, 22, 20, 22, 26, 22, 27, 31, 30, 26, 25, 24, 27, 36, 35, 38, 41, 44, 48, 43, 43, 47, 49, 53, 53, 54, 53, 45, 50, 53, 51, 56, 55, 57, 56, 55, 58, 59, 56, 65, 66, 68, 63, 68, 70, 69, 73, 72, 73, 70, 71, 68, 69, 70, 72, 73, 71, 71, 73, 74, 73, 75, 67, 67, 72, 74, 74, 75, 84, 91, 93, 93, 92, 94, 94, 97, 93, 94, 93, 91, 93, 91, 96, 94, 91, 98, 96, 101, 91, 89, 96, 94, 97, 96, 96, 90, 92, 95, 99, 97, 96, 96, 97, 101, 99, 98, 103, 97, 99, 99, 98, 99, 101, 100, 95, 99, 98, 100, 98, 97, 103, 98, 96, 90, 95, 99, 92, 93, 94, 91, 91, 92, 93, 99, 93, 96, 88, 90, 86, 88, 84, 83, 84, 84, 82, 79, 79, 81, 75, 75, 69, 71, 71, 69, 69, 65, 61, 61, 66, 60, 62, 66, 61, 65, 66, 67, 64, 60, 54, 51, 54, 55, 54, 54, 50, 47, 49, 51, 56, 54, 54, 61, 55, 57, 52, 53, 47, 48, 46, 56, 50, 52, 50, 55, 52, 48, 45, 45, 42, 40, 41, 42, 37, 40, 39, 35, 37, 33, 37, 34, 36, 35, 30, 31, 35, 33, 2, 2, 3, 3, 5, 4, 4, 5, 9, 16, 20, 22, 22, 22, 25, 27, 32, 31, 32, 31, 30, 32, 28, 27, 29, 36, 30, 31, 38, 32, 29, 26, 30, 33, 31, 26, 31, 22, 26, 27, 29, 24, 23, 28, 22, 22, 24, 28, 29, 31, 27, 24, 29, 34, 34, 31, 39, 38, 43, 45, 49, 50, 47, 45, 49, 57, 58, 46, 49, 57, 54, 50, 55, 62, 61, 58, 61, 66, 59, 59, 66, 65, 65, 71, 75, 72, 72, 71, 74, 71, 71, 70, 72, 76, 73, 74, 74, 66, 67, 71, 70, 71, 66, 67, 73, 74, 73, 74, 88, 91, 90, 91, 95, 96, 92, 90, 89, 93, 93, 93, 90, 92, 95, 94, 89, 92, 99, 98, 89, 92, 97, 94, 93, 93, 97, 94, 95, 95, 95, 91, 92, 96, 97, 100, 97, 93, 98, 95, 100, 98, 93, 94, 99, 98, 97, 99, 98, 97, 99, 101, 103, 99, 97, 94, 96, 101, 91, 90, 94, 88, 93, 91, 94, 101, 94, 91, 85, 88, 83, 86, 84, 87, 78, 78, 74, 73, 74, 79, 79, 79, 73, 70, 72, 71, 73, 71, 68, 63, 63, 60, 61, 65, 63, 65, 66, 62, 61, 53, 52, 54, 56, 56, 55, 45, 46, 54, 56, 52, 56, 55, 57, 55, 54, 57, 53, 52, 51, 47, 47, 55, 50, 51, 51, 49, 49, 49, 47, 46, 42, 42, 40, 39, 31, 36, 40, 40, 42, 40, 36, 33, 37, 35, 27, 28, 35, 30, 2, 3, 3, 4, 6, 6, 4, 3, 7, 13, 20, 21, 23, 22, 24, 26, 36, 26, 30, 28, 31, 31, 29, 29, 29, 34, 33, 34, 35, 27, 25, 26, 31, 29, 34, 26, 33, 25, 30, 28, 31, 28, 28, 33, 25, 26, 24, 31, 27, 26, 26, 28, 29, 28, 33, 30, 40, 38, 41, 40, 46, 50, 45, 44, 52, 54, 55, 53, 48, 54, 56, 53, 57, 62, 59, 54, 59, 68, 65, 59, 70, 68, 71, 67, 71, 73, 74, 72, 68, 71, 77, 76, 71, 76, 76, 75, 75, 72, 73, 72, 75, 72, 70, 67, 76, 76, 78, 87, 88, 91, 95, 94, 95, 93, 95, 88, 89, 89, 90, 88, 88, 89, 87, 89, 89, 88, 94, 92, 90, 92, 93, 95, 90, 87, 95, 95, 96, 94, 90, 92, 96, 92, 101, 100, 101, 100, 94, 91, 94, 96, 94, 95, 99, 102, 98, 93, 97, 97, 95, 102, 100, 96, 93, 95, 96, 96, 93, 87, 96, 89, 94, 92, 96, 92, 87, 89, 89, 86, 87, 85, 82, 84, 78, 79, 76, 75, 74, 73, 80, 73, 76, 74, 71, 66, 72, 71, 69, 61, 66, 63, 64, 70, 69, 68, 64, 58, 57, 56, 57, 56, 61, 59, 57, 52, 62, 66, 68, 57, 58, 58, 62, 51, 57, 50, 51, 49, 54, 52, 56, 58, 50, 50, 51, 47, 48, 47, 49, 44, 39, 43, 38, 41, 37, 34, 38, 39, 35, 38, 35, 32, 32, 33, 30, 29, 33, 29, 4, 5, 7, 13, 10, 11, 6, 7, 8, 13, 10, 12, 19, 16, 20, 19, 24, 26, 24, 24, 25, 28, 29, 29, 31, 25, 27, 30, 29, 30, 32, 25, 28, 29, 31, 27, 35, 33, 33, 29, 28, 33, 33, 33, 34, 35, 30, 28, 26, 34, 32, 31, 28, 29, 29, 28, 35, 33, 40, 37, 38, 40, 43, 49, 51, 49, 50, 56, 50, 53, 54, 59, 60, 55, 58, 61, 59, 56, 62, 67, 68, 70, 68, 71, 71, 66, 71, 74, 80, 76, 72, 74, 78, 77, 79, 78, 80, 76, 78, 77, 73, 72, 72, 77, 74, 77, 84, 85, 93, 90, 88, 90, 90, 91, 97, 94, 91, 90, 86, 88, 89, 87, 90, 91, 93, 86, 89, 87, 90, 92, 91, 92, 90, 88, 90, 88, 90, 92, 98, 97, 90, 90, 97, 97, 101, 100, 101, 97, 98, 96, 95, 91, 89, 95, 95, 97, 93, 96, 97, 97, 91, 100, 100, 94, 92, 94, 90, 95, 98, 92, 93, 92, 94, 92, 90, 81, 84, 91, 89, 83, 87, 87, 86, 80, 82, 74, 75, 76, 74, 78, 82, 75, 75, 71, 74, 67, 68, 69, 67, 62, 70, 70, 69, 72, 70, 74, 68, 68, 71, 65, 63, 62, 64, 62, 60, 65, 71, 69, 65, 64, 62, 57, 59, 54, 55, 52, 54, 50, 49, 56, 54, 53, 52, 53, 49, 51, 46, 42, 48, 46, 41, 41, 38, 36, 40, 39, 36, 32, 34, 32, 35, 27, 29, 35, 33, 28, 25, 31, 5, 5, 7, 9, 11, 6, 7, 8, 13, 10, 12, 19, 18, 20, 19, 22, 24, 24, 27, 25, 28, 30, 31, 31, 33, 27, 30, 30, 30, 32, 28, 30, 29, 32, 31, 35, 36, 36, 31, 34, 39, 35, 36, 36, 32, 30, 32, 31, 31, 38, 38, 32, 32, 34, 30, 33, 40, 40, 38, 41, 40, 44, 50, 50, 52, 48, 54, 53, 53, 57, 63, 62, 57, 62, 64, 61, 62, 65, 65, 67, 68, 72, 71, 73, 69, 73, 76, 79, 75, 74, 74, 75, 76, 79, 79, 81, 77, 79, 77, 73, 75, 75, 82, 81, 83, 91, 88, 94, 90, 88, 89, 90, 92, 96, 92, 92, 87, 86, 90, 90, 87, 89, 91, 92, 89, 88, 89, 94, 91, 93, 90, 87, 87, 88, 87, 92, 92, 93, 98, 91, 94, 96, 97, 98, 96, 94, 97, 100, 101, 93, 89, 91, 94, 97, 94, 95, 98, 94, 94, 98, 96, 97, 94, 95, 99, 90, 93, 96, 89, 92, 92, 90, 86, 82, 81, 87, 90, 88, 81, 85, 88, 83, 78, 80, 73, 75, 76, 75, 75, 82, 77, 76, 73, 75, 74, 74, 75, 70, 69, 81, 82, 76, 74, 71, 79, 77, 74, 75, 69, 68, 68, 63, 63, 60, 72, 67, 71, 63, 62, 59, 57, 58, 58, 59, 55, 55, 49, 51, 54, 53, 51, 52, 52, 47, 49, 48, 45, 44, 44, 41, 35, 36, 33, 37, 38, 34, 31, 32, 31, 35, 28, 31, 32, 31, 29, 25, 26, 5, 6, 7, 9, 11, 7, 7, 9, 13, 10, 11, 17, 21, 21, 23, 22, 24, 27, 28, 27, 30, 30, 32, 30, 35, 29, 32, 32, 31, 34, 33, 32, 31, 32, 33, 34, 36, 36, 32, 37, 40, 41, 35, 36, 32, 33, 36, 36, 29, 37, 40, 35, 36, 38, 37, 37, 39, 40, 40, 41, 45, 46, 48, 49, 51, 54, 56, 55, 51, 56, 61, 61, 58, 65, 66, 63, 66, 65, 63, 67, 66, 73, 71, 74, 70, 73, 76, 75, 79, 80, 76, 74, 78, 78, 79, 83, 82, 78, 76, 76, 78, 78, 84, 81, 89, 95, 90, 92, 89, 91, 90, 88, 92, 93, 89, 88, 89, 86, 86, 90, 92, 89, 86, 88, 90, 88, 88, 93, 93, 90, 88, 88, 87, 87, 89, 92, 91, 91, 94, 95, 95, 95, 96, 93, 96, 92, 96, 93, 97, 94, 91, 96, 91, 91, 90, 91, 93, 91, 90, 95, 91, 91, 94, 92, 97, 91, 91, 90, 86, 92, 90, 84, 81, 80, 81, 82, 83, 84, 79, 81, 87, 79, 76, 76, 73, 75, 75, 75, 73, 76, 76, 74, 76, 74, 80, 80, 86, 87, 82, 83, 78, 78, 75, 72, 79, 75, 71, 73, 65, 64, 70, 66, 62, 60, 70, 65, 69, 60, 61, 61, 58, 58, 57, 60, 58, 55, 52, 53, 53, 57, 55, 50, 51, 47, 47, 46, 45, 43, 42, 39, 35, 36, 36, 37, 35, 33, 29, 31, 30, 32, 29, 31, 32, 29, 29, 29, 27, 5, 6, 7, 8, 9, 9, 8, 9, 11, 11, 16, 22, 22, 24, 20, 22, 25, 25, 28, 32, 29, 31, 31, 34, 32, 33, 33, 31, 35, 35, 33, 32, 31, 33, 31, 35, 35, 35, 37, 38, 45, 39, 39, 35, 38, 40, 40, 34, 36, 40, 35, 34, 36, 41, 45, 40, 40, 40, 44, 49, 48, 46, 51, 51, 55, 56, 59, 52, 53, 57, 61, 57, 67, 67, 67, 67, 66, 67, 69, 68, 68, 68, 69, 72, 74, 77, 74, 79, 79, 81, 75, 85, 83, 78, 78, 78, 75, 76, 80, 80, 82, 82, 84, 86, 87, 90, 92, 91, 92, 89, 85, 89, 89, 89, 89, 88, 87, 86, 91, 94, 91, 90, 92, 92, 87, 85, 89, 92, 87, 87, 90, 88, 88, 91, 92, 89, 94, 90, 98, 96, 97, 96, 90, 95, 90, 95, 91, 92, 92, 91, 93, 85, 89, 87, 86, 87, 87, 86, 83, 85, 84, 91, 88, 92, 90, 90, 88, 84, 87, 89, 85, 79, 78, 80, 77, 78, 80, 74, 75, 83, 78, 78, 76, 75, 77, 72, 73, 68, 70, 73, 69, 75, 79, 91, 86, 89, 92, 83, 77, 79, 77, 74, 73, 78, 74, 74, 74, 65, 60, 67, 68, 62, 59, 64, 65, 65, 60, 60, 60, 59, 59, 62, 61, 58, 54, 52, 57, 56, 58, 59, 50, 48, 47, 45, 41, 43, 40, 40, 34, 38, 38, 37, 36, 32, 33, 30, 31, 32, 32, 28, 30, 34, 31, 30, 30, 28, 4, 4, 6, 6, 6, 13, 10, 8, 13, 10, 11, 12, 16, 20, 21, 23, 19, 18, 22, 27, 29, 33, 28, 29, 31, 32, 33, 32, 34, 30, 33, 37, 36, 35, 33, 34, 31, 33, 34, 37, 38, 39, 42, 44, 39, 40, 41, 41, 43, 39, 41, 36, 39, 38, 35, 39, 41, 42, 40, 41, 46, 50, 53, 51, 50, 52, 52, 54, 57, 53, 57, 56, 57, 64, 65, 65, 67, 67, 66, 68, 68, 72, 66, 66, 65, 72, 74, 76, 75, 79, 77, 81, 80, 79, 82, 81, 85, 87, 81, 78, 82, 80, 81, 76, 83, 84, 88, 86, 88, 92, 90, 91, 85, 87, 88, 85, 82, 87, 88, 87, 89, 91, 88, 92, 90, 88, 86, 82, 89, 91, 87, 87, 91, 89, 90, 93, 93, 87, 96, 93, 96, 99, 95, 95, 92, 95, 93, 92, 94, 91, 89, 89, 89, 86, 88, 85, 87, 86, 83, 83, 85, 85, 87, 82, 83, 91, 84, 87, 90, 82, 82, 85, 83, 77, 74, 77, 78, 76, 74, 72, 71, 74, 76, 77, 75, 76, 75, 69, 72, 67, 65, 68, 67, 83, 89, 83, 82, 89, 88, 83, 77, 75, 79, 72, 69, 78, 74, 68, 67, 65, 67, 68, 67, 64, 60, 63, 63, 59, 60, 60, 54, 58, 56, 60, 55, 54, 54, 56, 58, 52, 56, 57, 46, 43, 43, 43, 44, 40, 39, 44, 37, 35, 36, 35, 40, 31, 28, 31, 29, 32, 35, 28, 34, 33, 30, 27, 30, 29, 4, 4, 4, 5, 6, 9, 8, 13, 10, 11, 11, 15, 17, 17, 18, 17, 18, 23, 26, 29, 29, 33, 29, 31, 31, 33, 31, 34, 29, 31, 35, 36, 35, 33, 36, 35, 35, 37, 40, 33, 36, 39, 43, 42, 43, 40, 40, 43, 41, 40, 42, 44, 39, 42, 39, 37, 43, 42, 44, 47, 51, 53, 54, 51, 52, 55, 53, 53, 49, 60, 61, 56, 64, 62, 64, 64, 67, 65, 64, 66, 70, 70, 68, 61, 70, 72, 73, 74, 77, 75, 75, 80, 80, 83, 79, 78, 80, 85, 83, 81, 82, 81, 82, 77, 79, 85, 86, 86, 90, 89, 88, 89, 87, 85, 85, 90, 92, 89, 88, 89, 87, 86, 88, 88, 86, 86, 86, 88, 89, 91, 91, 92, 91, 92, 92, 90, 88, 95, 96, 93, 89, 97, 98, 95, 91, 91, 87, 86, 84, 85, 85, 84, 88, 82, 86, 87, 88, 84, 84, 85, 84, 87, 80, 86, 88, 81, 83, 86, 77, 78, 79, 76, 80, 72, 74, 77, 72, 72, 75, 73, 70, 72, 73, 71, 71, 73, 68, 71, 73, 68, 69, 75, 89, 83, 79, 78, 81, 86, 83, 76, 69, 78, 73, 70, 79, 74, 67, 71, 65, 64, 59, 62, 59, 60, 62, 64, 57, 60, 61, 56, 52, 52, 56, 51, 54, 56, 55, 50, 48, 55, 57, 49, 44, 41, 39, 41, 38, 36, 35, 34, 37, 32, 33, 40, 34, 31, 33, 28, 28, 27, 27, 30, 32, 30, 26, 29, 28, 3, 3, 4, 4, 4, 9, 8, 9, 9, 12, 17, 15, 14, 15, 16, 19, 22, 22, 26, 27, 32, 29, 29, 31, 31, 30, 34, 30, 32, 35, 37, 35, 35, 36, 35, 35, 36, 37, 34, 37, 40, 40, 39, 43, 41, 42, 46, 45, 40, 41, 46, 42, 40, 43, 44, 46, 48, 45, 48, 51, 48, 50, 53, 51, 57, 51, 52, 53, 54, 55, 58, 60, 60, 62, 61, 64, 62, 60, 67, 69, 70, 67, 60, 65, 69, 70, 73, 72, 73, 73, 78, 76, 79, 79, 80, 84, 85, 87, 83, 85, 81, 78, 80, 84, 80, 84, 82, 84, 88, 89, 87, 86, 85, 86, 88, 91, 90, 89, 89, 83, 87, 88, 92, 89, 87, 92, 93, 94, 92, 93, 95, 94, 93, 90, 89, 91, 94, 94, 91, 89, 95, 94, 88, 89, 86, 85, 82, 82, 86, 87, 83, 89, 87, 87, 83, 86, 88, 85, 86, 86, 88, 79, 83, 83, 82, 81, 82, 76, 77, 78, 74, 81, 73, 73, 76, 67, 73, 76, 74, 71, 72, 73, 72, 69, 72, 72, 73, 76, 74, 77, 82, 86, 82, 75, 76, 78, 84, 80, 74, 74, 76, 70, 70, 75, 70, 70, 66, 64, 63, 59, 58, 56, 60, 60, 65, 58, 59, 57, 59, 51, 53, 56, 53, 56, 51, 53, 50, 48, 51, 52, 46, 43, 42, 41, 39, 35, 39, 35, 36, 38, 34, 33, 33, 34, 34, 30, 28, 29, 28, 33, 29, 31, 25, 21, 26, 24, 2, 3, 4, 4, 3, 7, 6, 8, 9, 12, 16, 16, 16, 16, 19, 21, 21, 24, 24, 29, 27, 27, 29, 33, 29, 31, 32, 28, 34, 32, 31, 33, 36, 31, 31, 39, 37, 37, 39, 39, 38, 41, 38, 40, 42, 45, 47, 50, 43, 48, 47, 46, 42, 50, 55, 49, 56, 50, 52, 51, 49, 51, 53, 52, 58, 54, 53, 52, 53, 53, 57, 56, 56, 58, 60, 61, 61, 59, 64, 69, 70, 65, 66, 64, 64, 68, 72, 72, 73, 74, 77, 72, 73, 77, 82, 86, 85, 85, 85, 84, 85, 78, 80, 86, 79, 82, 86, 83, 88, 89, 86, 88, 88, 89, 89, 92, 92, 90, 89, 89, 86, 90, 92, 93, 93, 100, 97, 93, 94, 93, 98, 94, 92, 89, 94, 92, 94, 91, 87, 88, 90, 89, 83, 85, 84, 77, 76, 83, 91, 82, 81, 89, 85, 83, 81, 87, 84, 86, 87, 87, 90, 83, 79, 83, 84, 80, 80, 81, 81, 77, 72, 78, 77, 73, 76, 67, 73, 73, 74, 75, 74, 75, 74, 70, 75, 79, 78, 79, 78, 80, 86, 86, 81, 77, 79, 77, 81, 76, 73, 71, 76, 68, 68, 71, 71, 66, 60, 63, 63, 62, 57, 59, 60, 60, 62, 61, 58, 52, 55, 53, 54, 54, 56, 57, 46, 50, 47, 47, 53, 49, 45, 42, 43, 45, 33, 33, 35, 37, 36, 34, 35, 34, 30, 30, 29, 30, 29, 31, 31, 30, 28, 28, 24, 23, 26, 25, 3, 4, 5, 6, 6, 7, 7, 8, 13, 10, 11, 14, 15, 15, 16, 20, 20, 23, 23, 21, 27, 25, 23, 28, 34, 29, 30, 29, 29, 29, 31, 29, 35, 32, 29, 33, 37, 40, 35, 38, 41, 36, 40, 39, 39, 43, 42, 44, 46, 51, 54, 56, 54, 50, 52, 60, 57, 57, 56, 57, 55, 52, 54, 56, 57, 56, 54, 52, 54, 53, 54, 51, 56, 54, 59, 61, 61, 63, 61, 62, 65, 68, 65, 64, 68, 66, 69, 70, 67, 69, 73, 76, 73, 75, 77, 79, 83, 87, 82, 82, 80, 87, 80, 82, 84, 81, 77, 85, 85, 90, 90, 84, 86, 91, 89, 86, 88, 91, 88, 93, 93, 88, 90, 93, 93, 96, 93, 95, 94, 102, 94, 94, 94, 90, 88, 90, 90, 93, 91, 86, 86, 90, 88, 83, 84, 78, 80, 82, 84, 89, 84, 85, 88, 90, 83, 84, 86, 84, 87, 86, 86, 89, 84, 79, 80, 81, 80, 81, 80, 82, 82, 78, 81, 80, 77, 79, 72, 74, 75, 75, 75, 78, 79, 74, 78, 84, 79, 81, 79, 80, 80, 83, 80, 77, 75, 75, 76, 75, 68, 68, 68, 74, 69, 67, 67, 66, 61, 60, 60, 60, 58, 59, 57, 59, 58, 60, 59, 59, 57, 54, 52, 54, 52, 55, 57, 48, 47, 44, 47, 50, 50, 46, 38, 40, 42, 34, 36, 36, 40, 37, 33, 32, 31, 29, 35, 32, 30, 29, 30, 29, 27, 25, 31, 26, 26, 25, 23, 4, 5, 5, 9, 9, 8, 9, 13, 10, 11, 12, 13, 13, 10, 13, 10, 14, 20, 19, 24, 21, 20, 27, 24, 24, 28, 30, 31, 28, 28, 33, 26, 29, 29, 36, 29, 31, 34, 34, 39, 33, 37, 40, 36, 39, 40, 37, 43, 42, 43, 42, 53, 53, 55, 56, 55, 52, 57, 60, 56, 54, 55, 54, 53, 55, 55, 58, 58, 59, 56, 54, 52, 57, 55, 55, 53, 56, 62, 63, 59, 62, 61, 66, 68, 73, 67, 70, 69, 65, 64, 65, 68, 70, 73, 73, 77, 77, 79, 84, 88, 87, 79, 80, 84, 79, 84, 86, 86, 81, 84, 85, 90, 91, 87, 89, 92, 89, 87, 86, 92, 87, 93, 96, 93, 94, 93, 91, 95, 91, 94, 94, 100, 97, 91, 91, 90, 92, 85, 91, 90, 87, 87, 89, 92, 87, 80, 77, 80, 85, 85, 87, 89, 87, 89, 88, 93, 87, 89, 85, 84, 87, 86, 82, 83, 82, 79, 78, 81, 80, 79, 80, 82, 85, 87, 83, 86, 82, 81, 81, 81, 78, 76, 77, 80, 83, 82, 85, 86, 80, 78, 81, 82, 83, 81, 76, 73, 71, 66, 70, 70, 63, 65, 66, 65, 71, 70, 63, 59, 60, 60, 57, 57, 55, 57, 59, 58, 57, 61, 60, 58, 62, 54, 52, 52, 54, 57, 52, 49, 47, 43, 46, 47, 49, 41, 40, 42, 40, 35, 37, 36, 36, 33, 33, 31, 32, 34, 36, 38, 32, 29, 29, 31, 26, 23, 28, 27, 25, 27, 23, 5, 6, 7, 9, 13, 10, 8, 9, 9, 11, 11, 12, 13, 10, 9, 12, 17, 20, 20, 20, 21, 24, 25, 27, 31, 31, 29, 32, 26, 30, 30, 28, 28, 35, 29, 36, 41, 38, 41, 37, 41, 41, 42, 40, 40, 31, 39, 41, 44, 48, 50, 55, 53, 55, 53, 54, 52, 56, 55, 51, 50, 50, 52, 54, 54, 53, 60, 63, 60, 54, 53, 55, 59, 57, 57, 55, 56, 60, 59, 65, 63, 64, 67, 70, 62, 70, 68, 69, 68, 65, 63, 66, 68, 76, 79, 77, 78, 81, 82, 85, 81, 84, 81, 88, 87, 88, 81, 82, 86, 87, 86, 85, 83, 89, 90, 88, 85, 87, 89, 88, 93, 97, 90, 96, 93, 92, 89, 96, 91, 95, 89, 93, 90, 93, 93, 91, 82, 86, 87, 88, 89, 89, 91, 88, 81, 75, 85, 92, 86, 88, 87, 88, 93, 88, 86, 82, 88, 89, 85, 82, 87, 84, 84, 87, 87, 79, 75, 78, 78, 81, 83, 83, 89, 86, 90, 80, 82, 86, 81, 75, 77, 78, 77, 82, 86, 84, 84, 80, 79, 77, 79, 82, 78, 70, 72, 67, 70, 71, 69, 63, 63, 66, 65, 70, 69, 66, 60, 62, 62, 55, 58, 59, 59, 62, 58, 58, 58, 55, 55, 60, 52, 53, 52, 53, 53, 46, 46, 43, 41, 45, 45, 46, 41, 40, 37, 38, 39, 35, 36, 33, 30, 33, 30, 39, 38, 33, 34, 26, 28, 30, 31, 25, 27, 25, 27, 23, 24, 21, 3, 5, 6, 8, 9, 6, 7, 8, 8, 8, 13, 10, 13, 10, 9, 13, 14, 17, 17, 20, 21, 22, 24, 26, 29, 31, 29, 32, 26, 28, 28, 30, 28, 33, 31, 35, 41, 37, 37, 35, 42, 39, 45, 43, 43, 33, 37, 40, 43, 49, 47, 52, 49, 55, 57, 55, 54, 53, 51, 51, 53, 52, 54, 55, 57, 51, 54, 60, 58, 51, 59, 58, 60, 58, 58, 60, 55, 55, 57, 63, 62, 61, 62, 68, 68, 69, 65, 64, 70, 64, 63, 68, 65, 66, 74, 78, 84, 85, 81, 85, 80, 79, 83, 87, 84, 92, 86, 83, 85, 85, 84, 83, 83, 89, 90, 91, 90, 87, 87, 88, 92, 99, 89, 90, 88, 91, 87, 92, 85, 96, 89, 92, 91, 93, 90, 89, 82, 84, 87, 90, 88, 89, 89, 86, 83, 85, 91, 97, 91, 91, 91, 92, 91, 82, 80, 82, 87, 85, 85, 83, 85, 84, 84, 86, 85, 77, 79, 83, 77, 77, 82, 85, 87, 88, 87, 79, 82, 84, 82, 82, 78, 76, 80, 81, 81, 82, 81, 79, 78, 76, 78, 78, 75, 71, 73, 71, 70, 68, 66, 62, 62, 67, 65, 68, 67, 63, 59, 62, 61, 57, 60, 62, 62, 59, 55, 60, 59, 55, 56, 55, 49, 55, 54, 52, 50, 48, 46, 45, 47, 44, 43, 45, 40, 35, 33, 38, 35, 34, 39, 35, 35, 36, 31, 39, 32, 35, 35, 27, 30, 30, 25, 26, 33, 27, 27, 24, 26, 24, 1, 2, 5, 6, 7, 4, 6, 6, 5, 6, 7, 9, 9, 13, 13, 17, 17, 17, 18, 18, 22, 24, 26, 28, 31, 31, 29, 31, 31, 31, 31, 31, 31, 35, 40, 39, 40, 44, 43, 37, 43, 45, 45, 43, 42, 45, 42, 43, 46, 49, 45, 47, 51, 55, 57, 58, 53, 53, 56, 53, 54, 55, 57, 52, 52, 58, 57, 52, 58, 59, 63, 60, 58, 64, 60, 60, 56, 63, 60, 58, 59, 61, 67, 63, 66, 70, 70, 66, 64, 67, 68, 71, 76, 77, 81, 83, 83, 84, 81, 79, 86, 88, 85, 87, 85, 82, 88, 85, 85, 86, 86, 87, 85, 85, 90, 89, 87, 88, 91, 94, 92, 89, 87, 89, 87, 91, 87, 93, 91, 91, 90, 90, 90, 89, 83, 84, 85, 84, 84, 86, 84, 80, 78, 89, 95, 95, 93, 92, 96, 96, 90, 81, 81, 85, 91, 82, 82, 83, 87, 87, 84, 85, 84, 81, 87, 88, 82, 81, 86, 89, 90, 86, 85, 80, 80, 82, 81, 85, 81, 77, 78, 79, 81, 79, 79, 78, 77, 78, 78, 77, 75, 73, 75, 73, 69, 65, 64, 65, 65, 68, 62, 67, 67, 64, 60, 62, 55, 59, 62, 59, 57, 57, 56, 65, 60, 56, 54, 51, 48, 51, 51, 54, 48, 49, 45, 48, 53, 43, 44, 47, 38, 35, 38, 37, 31, 31, 38, 35, 36, 35, 29, 38, 31, 34, 37, 34, 33, 31, 23, 29, 31, 27, 30, 25, 24, 23, 2, 4, 6, 6, 4, 5, 6, 7, 8, 7, 13, 10, 9, 9, 11, 14, 16, 16, 17, 16, 20, 23, 23, 27, 26, 29, 29, 30, 30, 30, 32, 30, 30, 37, 38, 37, 38, 42, 41, 38, 40, 44, 43, 44, 45, 47, 45, 41, 44, 45, 46, 43, 51, 53, 55, 62, 57, 53, 59, 56, 56, 57, 57, 54, 52, 53, 51, 53, 56, 59, 65, 61, 60, 63, 64, 66, 61, 62, 57, 59, 59, 59, 65, 62, 64, 70, 66, 65, 63, 61, 67, 73, 79, 76, 78, 85, 86, 80, 83, 82, 84, 86, 84, 83, 85, 83, 86, 85, 85, 88, 87, 85, 88, 85, 82, 82, 82, 85, 88, 92, 87, 86, 89, 85, 84, 85, 87, 88, 86, 86, 85, 82, 83, 83, 77, 80, 81, 79, 80, 81, 78, 82, 84, 95, 91, 92, 93, 93, 94, 93, 93, 87, 85, 86, 88, 81, 82, 82, 84, 86, 81, 83, 85, 83, 89, 88, 90, 85, 92, 91, 90, 87, 86, 82, 85, 81, 80, 82, 85, 81, 75, 78, 80, 78, 78, 79, 76, 76, 75, 73, 74, 73, 72, 71, 69, 69, 65, 66, 66, 67, 64, 64, 62, 61, 58, 57, 59, 58, 60, 59, 57, 53, 56, 60, 56, 54, 55, 52, 50, 49, 46, 51, 48, 47, 45, 47, 50, 41, 43, 46, 40, 37, 38, 34, 31, 33, 36, 33, 36, 40, 34, 39, 35, 32, 35, 34, 37, 35, 26, 31, 28, 30, 31, 27, 27, 29, 2, 3, 6, 8, 9, 8, 6, 7, 8, 13, 10, 13, 10, 11, 9, 8, 9, 12, 14, 16, 16, 21, 20, 24, 21, 26, 23, 25, 28, 30, 28, 29, 30, 30, 31, 39, 39, 37, 37, 40, 41, 42, 38, 42, 42, 44, 48, 46, 44, 41, 46, 41, 44, 46, 51, 50, 50, 56, 55, 51, 57, 60, 54, 55, 57, 55, 51, 52, 52, 52, 55, 57, 63, 58, 60, 61, 65, 64, 63, 61, 56, 61, 62, 63, 61, 62, 60, 67, 65, 61, 63, 64, 64, 72, 76, 75, 75, 83, 90, 83, 85, 85, 82, 85, 82, 83, 82, 83, 83, 87, 87, 87, 88, 82, 82, 82, 79, 82, 82, 83, 82, 81, 84, 83, 85, 84, 86, 82, 86, 89, 85, 84, 89, 85, 82, 78, 80, 77, 79, 76, 79, 78, 81, 91, 93, 92, 89, 87, 88, 92, 93, 90, 93, 89, 87, 88, 86, 84, 81, 83, 86, 86, 84, 83, 88, 85, 86, 88, 88, 89, 95, 92, 87, 88, 81, 84, 89, 81, 81, 84, 83, 84, 79, 77, 75, 77, 78, 77, 74, 75, 76, 76, 74, 65, 67, 66, 66, 67, 66, 67, 64, 65, 64, 59, 59, 59, 57, 56, 62, 55, 55, 54, 57, 56, 54, 53, 54, 55, 54, 50, 49, 50, 45, 48, 47, 47, 44, 41, 43, 38, 41, 40, 37, 35, 36, 33, 30, 37, 34, 30, 34, 41, 36, 37, 35, 32, 33, 33, 36, 35, 30, 31, 27, 32, 30, 27, 26, 28, 4, 5, 9, 11, 14, 14, 13, 10, 8, 7, 9, 12, 13, 10, 9, 13, 10, 11, 12, 16, 19, 23, 24, 21, 25, 20, 25, 25, 27, 28, 29, 28, 30, 29, 28, 34, 36, 33, 35, 35, 38, 39, 40, 38, 41, 45, 42, 46, 46, 47, 48, 50, 44, 43, 52, 50, 49, 51, 53, 50, 52, 57, 61, 53, 54, 58, 55, 53, 52, 52, 53, 55, 56, 64, 59, 61, 57, 59, 58, 61, 60, 58, 61, 62, 66, 62, 64, 63, 66, 69, 67, 66, 67, 65, 68, 69, 73, 76, 84, 86, 81, 83, 86, 80, 82, 82, 85, 82, 82, 83, 86, 87, 83, 83, 81, 77, 82, 80, 82, 81, 79, 78, 79, 81, 84, 83, 90, 94, 92, 93, 92, 87, 85, 91, 86, 86, 80, 82, 76, 81, 76, 81, 82, 92, 95, 92, 93, 87, 87, 91, 88, 90, 91, 89, 88, 84, 87, 87, 89, 85, 88, 93, 88, 91, 84, 90, 91, 86, 94, 88, 92, 91, 88, 88, 88, 82, 86, 89, 87, 84, 85, 81, 85, 81, 76, 75, 76, 75, 74, 71, 72, 74, 76, 76, 69, 66, 63, 62, 63, 65, 62, 61, 64, 68, 60, 57, 59, 61, 58, 57, 54, 54, 50, 54, 53, 50, 54, 55, 57, 55, 49, 44, 48, 45, 54, 49, 47, 45, 40, 44, 39, 43, 39, 37, 37, 37, 39, 36, 36, 30, 32, 35, 36, 35, 37, 36, 35, 33, 32, 34, 33, 29, 28, 28, 29, 28, 26, 22, 21, 5, 8, 9, 12, 16, 16, 13, 13, 10, 13, 10, 12, 13, 14, 13, 10, 13, 17, 15, 19, 17, 18, 25, 22, 25, 21, 27, 27, 29, 29, 30, 28, 31, 28, 29, 34, 35, 33, 36, 32, 34, 40, 39, 38, 41, 41, 45, 48, 47, 48, 50, 49, 51, 48, 52, 49, 51, 52, 55, 52, 50, 54, 56, 54, 54, 59, 54, 61, 54, 50, 49, 51, 55, 62, 54, 59, 56, 56, 55, 60, 60, 60, 61, 61, 66, 66, 68, 69, 67, 70, 74, 69, 66, 65, 65, 66, 70, 74, 77, 81, 79, 82, 88, 79, 85, 82, 83, 84, 81, 84, 84, 87, 81, 80, 78, 79, 82, 79, 78, 79, 78, 81, 85, 86, 88, 89, 93, 93, 93, 96, 91, 90, 90, 86, 84, 91, 88, 87, 86, 92, 88, 88, 97, 99, 92, 91, 94, 94, 89, 89, 86, 90, 92, 87, 89, 88, 90, 91, 95, 91, 92, 91, 94, 91, 90, 87, 88, 90, 97, 92, 87, 86, 87, 88, 85, 85, 83, 85, 84, 83, 81, 80, 85, 79, 76, 79, 77, 73, 73, 65, 70, 74, 72, 66, 62, 66, 64, 64, 66, 64, 65, 62, 64, 64, 60, 58, 58, 62, 57, 54, 53, 56, 53, 52, 53, 58, 56, 51, 50, 53, 46, 45, 50, 46, 55, 49, 45, 47, 42, 42, 39, 41, 40, 37, 38, 41, 43, 36, 31, 29, 34, 33, 32, 38, 36, 40, 34, 31, 31, 36, 31, 26, 26, 29, 26, 28, 25, 23, 21, 5, 7, 9, 11, 14, 11, 14, 13, 14, 14, 12, 19, 14, 12, 18, 15, 16, 15, 16, 23, 25, 25, 25, 27, 26, 28, 30, 30, 28, 30, 29, 31, 32, 32, 33, 38, 37, 41, 40, 38, 39, 40, 44, 47, 48, 48, 48, 47, 46, 50, 47, 50, 50, 51, 52, 53, 58, 51, 56, 58, 58, 57, 62, 58, 63, 57, 56, 55, 53, 58, 62, 54, 57, 54, 56, 55, 60, 60, 63, 62, 61, 64, 64, 65, 67, 69, 71, 72, 66, 69, 65, 64, 67, 68, 75, 71, 78, 76, 79, 87, 79, 85, 84, 84, 84, 81, 83, 80, 85, 81, 82, 78, 83, 83, 82, 74, 76, 78, 81, 83, 90, 90, 94, 95, 92, 92, 97, 94, 95, 92, 88, 93, 96, 97, 96, 99, 97, 102, 103, 101, 98, 94, 94, 91, 94, 94, 92, 89, 86, 91, 89, 93, 93, 93, 93, 96, 93, 91, 88, 90, 88, 91, 87, 89, 89, 89, 91, 88, 85, 89, 84, 86, 79, 82, 86, 78, 82, 82, 81, 81, 81, 77, 80, 80, 76, 71, 66, 67, 66, 64, 64, 65, 64, 63, 65, 64, 67, 65, 66, 66, 60, 59, 59, 61, 56, 55, 53, 54, 56, 51, 53, 59, 62, 51, 51, 48, 56, 50, 49, 53, 47, 49, 45, 45, 43, 42, 43, 44, 42, 43, 40, 40, 39, 42, 38, 34, 37, 37, 32, 33, 36, 33, 37, 29, 33, 33, 33, 31, 28, 28, 30, 24, 26, 24, 19, 21, 4, 5, 8, 13, 10, 13, 13, 10, 12, 11, 15, 15, 15, 17, 14, 11, 17, 16, 15, 15, 19, 22, 24, 25, 24, 24, 25, 26, 29, 31, 29, 29, 30, 31, 30, 33, 36, 40, 38, 38, 38, 40, 42, 43, 50, 46, 47, 48, 48, 47, 51, 47, 45, 49, 52, 51, 56, 53, 54, 50, 56, 62, 59, 57, 58, 61, 63, 60, 59, 53, 53, 54, 57, 53, 59, 56, 56, 55, 58, 58, 62, 62, 63, 63, 63, 65, 65, 69, 70, 72, 66, 68, 64, 66, 68, 68, 73, 70, 80, 77, 82, 87, 80, 83, 84, 85, 86, 84, 84, 81, 82, 80, 79, 80, 86, 85, 82, 76, 73, 74, 80, 85, 90, 88, 94, 94, 94, 93, 97, 100, 97, 93, 91, 96, 96, 103, 103, 106, 101, 105, 107, 101, 102, 97, 93, 95, 94, 91, 90, 93, 91, 89, 93, 94, 91, 94, 91, 96, 92, 88, 87, 88, 89, 90, 88, 90, 87, 87, 87, 89, 84, 85, 86, 85, 78, 83, 86, 80, 79, 79, 81, 80, 78, 75, 77, 79, 79, 70, 67, 71, 63, 63, 64, 63, 64, 62, 66, 63, 68, 65, 69, 67, 59, 61, 59, 60, 54, 55, 54, 55, 53, 48, 55, 59, 57, 52, 54, 49, 57, 52, 53, 51, 45, 47, 45, 46, 42, 43, 43, 46, 42, 45, 39, 38, 40, 41, 37, 40, 42, 37, 33, 33, 34, 37, 35, 34, 37, 33, 32, 35, 30, 30, 32, 25, 28, 25, 18, 21, 3, 4, 6, 8, 13, 10, 14, 12, 11, 14, 14, 16, 15, 13, 14, 15, 19, 19, 17, 18, 24, 22, 23, 20, 23, 24, 24, 27, 30, 28, 29, 32, 30, 31, 35, 35, 39, 39, 39, 40, 39, 43, 45, 49, 47, 48, 48, 49, 49, 52, 47, 45, 48, 53, 53, 56, 56, 53, 52, 55, 61, 58, 56, 58, 62, 62, 60, 61, 58, 61, 55, 53, 54, 58, 58, 56, 57, 60, 56, 59, 59, 63, 62, 64, 74, 70, 67, 64, 68, 66, 66, 64, 67, 67, 68, 72, 73, 80, 78, 82, 86, 85, 86, 82, 83, 83, 84, 81, 83, 81, 80, 79, 83, 86, 85, 84, 81, 75, 76, 86, 94, 91, 90, 93, 92, 93, 91, 96, 96, 94, 94, 93, 94, 96, 102, 101, 102, 103, 102, 103, 101, 99, 96, 94, 93, 94, 91, 95, 97, 96, 89, 94, 91, 90, 94, 94, 95, 91, 84, 84, 89, 92, 90, 87, 88, 87, 87, 86, 86, 85, 86, 85, 82, 75, 83, 86, 82, 73, 76, 76, 77, 78, 74, 73, 74, 77, 73, 68, 68, 63, 66, 64, 64, 67, 67, 63, 65, 67, 65, 70, 67, 61, 61, 58, 63, 55, 59, 58, 55, 53, 53, 55, 61, 56, 54, 53, 53, 54, 52, 54, 51, 47, 49, 45, 43, 43, 44, 43, 43, 40, 41, 39, 38, 38, 39, 39, 40, 42, 38, 38, 33, 36, 38, 32, 38, 32, 33, 33, 34, 31, 33, 31, 28, 29, 24, 23, 26, 4, 5, 6, 6, 7, 13, 10, 12, 12, 12, 11, 15, 18, 16, 15, 15, 17, 22, 21, 20, 21, 19, 21, 20, 23, 26, 28, 28, 27, 28, 29, 34, 32, 33, 38, 37, 36, 36, 40, 40, 36, 39, 43, 43, 43, 48, 46, 45, 47, 50, 48, 52, 50, 50, 50, 53, 52, 52, 52, 55, 59, 58, 54, 58, 62, 65, 59, 62, 65, 64, 62, 52, 45, 56, 61, 59, 63, 63, 60, 60, 61, 65, 63, 64, 67, 65, 60, 63, 67, 70, 66, 69, 68, 65, 68, 73, 75, 79, 80, 80, 81, 86, 83, 83, 81, 75, 79, 74, 84, 84, 83, 78, 84, 85, 87, 86, 87, 86, 80, 87, 92, 91, 95, 93, 89, 92, 92, 94, 95, 89, 91, 92, 87, 96, 98, 103, 98, 99, 97, 99, 104, 98, 96, 90, 93, 96, 96, 99, 99, 94, 89, 94, 94, 92, 92, 90, 92, 88, 87, 81, 90, 91, 88, 85, 86, 87, 84, 85, 86, 88, 85, 84, 81, 80, 83, 82, 83, 76, 81, 74, 78, 76, 74, 73, 76, 74, 77, 71, 70, 68, 70, 70, 72, 72, 69, 65, 66, 70, 65, 67, 69, 63, 62, 63, 65, 58, 58, 55, 56, 56, 57, 55, 60, 55, 55, 53, 52, 52, 49, 53, 52, 49, 45, 46, 40, 41, 40, 40, 42, 38, 41, 38, 40, 38, 41, 44, 42, 43, 43, 43, 41, 37, 40, 33, 36, 33, 32, 32, 32, 30, 32, 26, 21, 29, 24, 26, 29, 5, 5, 6, 6, 6, 8, 11, 14, 11, 12, 13, 13, 16, 17, 12, 13, 18, 21, 22, 19, 21, 21, 21, 23, 26, 28, 28, 29, 31, 29, 31, 35, 33, 37, 37, 35, 33, 37, 39, 37, 40, 40, 40, 44, 47, 47, 47, 45, 51, 51, 55, 54, 51, 51, 58, 57, 54, 54, 57, 56, 55, 57, 61, 61, 63, 59, 62, 61, 66, 66, 66, 58, 64, 67, 62, 66, 64, 64, 67, 66, 68, 66, 62, 60, 67, 63, 67, 66, 71, 65, 69, 71, 68, 68, 68, 69, 74, 76, 75, 80, 84, 82, 83, 83, 77, 79, 75, 84, 83, 78, 77, 78, 80, 87, 86, 86, 93, 84, 83, 89, 91, 98, 95, 88, 89, 90, 96, 94, 90, 96, 95, 89, 89, 93, 101, 98, 96, 96, 97, 94, 95, 94, 89, 91, 95, 98, 99, 96, 92, 88, 94, 96, 95, 95, 93, 87, 88, 91, 83, 89, 88, 87, 84, 85, 85, 87, 87, 85, 90, 89, 85, 81, 83, 80, 78, 79, 74, 76, 73, 77, 76, 77, 79, 81, 76, 76, 73, 69, 69, 73, 71, 74, 71, 70, 71, 70, 69, 71, 73, 69, 62, 67, 64, 66, 65, 60, 54, 56, 58, 57, 54, 60, 60, 57, 50, 49, 49, 49, 53, 51, 47, 42, 46, 42, 40, 42, 41, 39, 39, 43, 38, 39, 39, 44, 47, 45, 37, 41, 42, 45, 37, 38, 37, 38, 36, 36, 32, 29, 31, 28, 31, 27, 24, 25, 24, 26, 5, 5, 6, 6, 6, 6, 9, 13, 11, 13, 13, 14, 15, 15, 16, 20, 19, 20, 25, 20, 24, 22, 19, 22, 24, 25, 25, 27, 30, 29, 31, 37, 33, 34, 39, 37, 34, 35, 36, 35, 39, 41, 41, 42, 48, 48, 45, 46, 50, 52, 53, 54, 53, 57, 60, 59, 56, 57, 54, 56, 54, 58, 57, 60, 61, 61, 60, 63, 65, 64, 73, 73, 70, 71, 71, 69, 68, 64, 66, 68, 70, 68, 71, 67, 65, 62, 68, 66, 73, 67, 68, 65, 63, 68, 71, 71, 67, 69, 68, 74, 74, 75, 82, 82, 79, 83, 82, 81, 79, 76, 76, 74, 78, 83, 86, 83, 89, 84, 83, 93, 89, 100, 95, 87, 87, 87, 93, 88, 88, 92, 88, 92, 85, 97, 91, 95, 93, 94, 95, 93, 92, 91, 91, 92, 92, 95, 96, 94, 94, 94, 95, 92, 89, 93, 95, 87, 92, 93, 92, 94, 92, 88, 86, 88, 85, 87, 86, 86, 85, 87, 88, 84, 83, 79, 78, 80, 79, 77, 76, 74, 75, 74, 80, 81, 78, 77, 78, 78, 71, 72, 69, 69, 67, 70, 70, 72, 67, 73, 71, 69, 64, 62, 64, 66, 58, 60, 55, 55, 58, 58, 55, 61, 61, 59, 52, 52, 50, 50, 51, 47, 45, 45, 46, 45, 41, 42, 45, 43, 45, 44, 36, 39, 43, 43, 40, 42, 34, 40, 39, 41, 36, 36, 39, 38, 35, 38, 33, 30, 33, 26, 31, 31, 26, 27, 26, 26, 2, 3, 4, 5, 5, 6, 7, 13, 10, 13, 15, 14, 14, 13, 13, 14, 16, 17, 18, 26, 20, 23, 22, 21, 24, 26, 28, 26, 27, 27, 28, 32, 33, 35, 34, 38, 39, 39, 37, 37, 37, 35, 42, 40, 41, 45, 47, 45, 47, 49, 52, 55, 55, 58, 57, 60, 62, 54, 62, 62, 59, 54, 58, 56, 61, 62, 62, 61, 65, 63, 63, 66, 71, 71, 73, 72, 69, 75, 67, 68, 71, 71, 70, 69, 70, 68, 66, 68, 66, 69, 66, 68, 65, 62, 66, 70, 69, 65, 64, 64, 68, 68, 74, 78, 81, 83, 83, 82, 79, 78, 78, 75, 69, 71, 74, 80, 80, 80, 84, 86, 92, 90, 97, 91, 86, 90, 87, 91, 90, 91, 89, 86, 92, 87, 92, 85, 92, 90, 90, 92, 90, 88, 89, 97, 103, 97, 95, 94, 91, 89, 89, 90, 92, 91, 92, 91, 92, 95, 90, 88, 92, 93, 85, 85, 88, 86, 84, 85, 86, 87, 89, 87, 84, 85, 82, 79, 80, 78, 77, 76, 71, 77, 77, 85, 83, 77, 73, 74, 78, 71, 70, 69, 70, 70, 73, 71, 71, 68, 69, 65, 67, 64, 65, 62, 64, 64, 63, 58, 57, 60, 59, 60, 60, 56, 57, 56, 57, 52, 49, 48, 47, 50, 49, 44, 44, 40, 41, 44, 47, 47, 43, 39, 45, 48, 41, 41, 41, 38, 38, 38, 40, 35, 38, 38, 35, 35, 34, 33, 34, 31, 29, 27, 26, 28, 26, 25, 24, 2, 2, 4, 4, 5, 5, 6, 6, 12, 15, 14, 13, 10, 11, 12, 15, 16, 18, 17, 24, 20, 25, 25, 26, 25, 27, 31, 31, 31, 27, 27, 30, 32, 35, 35, 37, 40, 38, 38, 37, 40, 32, 39, 37, 40, 39, 43, 49, 49, 45, 49, 56, 55, 57, 53, 59, 64, 56, 59, 61, 60, 56, 55, 58, 60, 60, 62, 60, 61, 61, 64, 62, 64, 69, 70, 68, 71, 74, 68, 69, 71, 68, 72, 70, 74, 75, 72, 66, 66, 66, 65, 65, 66, 64, 65, 65, 66, 65, 64, 68, 68, 70, 74, 77, 77, 79, 80, 79, 77, 80, 80, 78, 73, 71, 70, 75, 74, 78, 85, 85, 87, 87, 93, 87, 86, 90, 84, 89, 91, 92, 90, 89, 89, 90, 90, 91, 88, 87, 90, 90, 92, 90, 89, 95, 100, 98, 93, 95, 97, 90, 90, 91, 96, 93, 93, 88, 94, 93, 89, 93, 94, 94, 87, 83, 81, 80, 79, 85, 82, 77, 86, 86, 83, 86, 84, 84, 85, 84, 83, 80, 74, 80, 77, 81, 77, 73, 74, 73, 76, 76, 70, 68, 71, 74, 74, 78, 72, 69, 71, 69, 68, 65, 65, 62, 61, 63, 64, 63, 61, 62, 61, 64, 57, 59, 58, 56, 55, 52, 49, 47, 48, 51, 52, 47, 46, 43, 43, 43, 48, 49, 46, 41, 48, 46, 39, 44, 43, 36, 35, 39, 37, 35, 38, 38, 34, 34, 33, 31, 31, 33, 31, 28, 26, 25, 24, 26, 25, 3, 3, 4, 5, 5, 5, 4, 5, 9, 11, 13, 13, 13, 10, 11, 15, 16, 19, 18, 22, 20, 25, 25, 26, 24, 28, 33, 34, 35, 30, 29, 30, 34, 32, 34, 38, 38, 34, 35, 37, 42, 36, 40, 39, 37, 36, 40, 50, 48, 43, 49, 54, 56, 56, 51, 56, 59, 58, 58, 63, 59, 55, 51, 59, 59, 61, 63, 57, 62, 63, 61, 64, 64, 66, 66, 68, 72, 65, 71, 69, 74, 69, 69, 70, 76, 72, 73, 65, 69, 71, 67, 61, 67, 65, 64, 62, 66, 65, 67, 69, 69, 74, 74, 77, 77, 76, 78, 75, 78, 85, 81, 79, 81, 77, 69, 71, 74, 81, 83, 80, 88, 83, 90, 85, 83, 86, 85, 87, 89, 88, 88, 91, 87, 89, 93, 92, 87, 86, 91, 93, 95, 90, 89, 93, 100, 97, 95, 96, 98, 92, 94, 94, 100, 96, 95, 93, 94, 90, 91, 96, 91, 95, 95, 89, 84, 79, 78, 85, 83, 82, 81, 84, 86, 87, 85, 87, 85, 85, 84, 81, 77, 84, 80, 80, 76, 76, 76, 72, 72, 76, 75, 72, 75, 75, 76, 81, 75, 71, 75, 73, 72, 66, 62, 63, 65, 63, 64, 66, 64, 61, 61, 64, 56, 64, 57, 54, 50, 53, 51, 47, 48, 49, 52, 49, 46, 46, 42, 43, 50, 51, 47, 44, 51, 47, 41, 43, 41, 37, 38, 40, 35, 39, 36, 39, 33, 32, 33, 28, 29, 34, 32, 27, 28, 26, 23, 24, 23, 3, 3, 3, 5, 5, 4, 3, 5, 9, 13, 14, 12, 11, 11, 12, 16, 18, 18, 19, 20, 23, 23, 26, 27, 33, 36, 36, 38, 33, 32, 30, 30, 35, 38, 38, 36, 36, 37, 39, 40, 39, 42, 40, 31, 38, 37, 41, 44, 43, 50, 50, 55, 54, 47, 54, 55, 55, 54, 64, 57, 55, 49, 61, 61, 62, 60, 59, 63, 63, 61, 65, 66, 66, 65, 68, 68, 70, 75, 71, 73, 69, 68, 71, 76, 70, 70, 71, 72, 72, 67, 63, 65, 60, 63, 66, 68, 65, 71, 64, 66, 73, 75, 79, 74, 72, 76, 73, 80, 90, 85, 81, 84, 84, 83, 72, 78, 87, 88, 82, 86, 81, 87, 81, 78, 80, 84, 80, 88, 87, 85, 91, 89, 84, 92, 88, 93, 91, 91, 96, 94, 88, 90, 91, 101, 92, 96, 96, 95, 95, 97, 93, 99, 100, 96, 100, 97, 93, 94, 94, 92, 100, 98, 94, 101, 98, 93, 90, 90, 87, 86, 86, 89, 89, 86, 87, 83, 85, 84, 84, 77, 85, 81, 82, 78, 84, 79, 73, 77, 73, 80, 75, 70, 77, 83, 81, 77, 77, 80, 76, 75, 70, 63, 65, 65, 67, 62, 68, 67, 61, 62, 64, 57, 62, 55, 55, 47, 53, 51, 49, 52, 51, 52, 49, 44, 48, 41, 46, 49, 47, 50, 48, 52, 44, 43, 41, 41, 42, 41, 38, 41, 40, 31, 39, 36, 32, 28, 28, 32, 32, 29, 25, 30, 25, 24, 23, 22, 5, 6, 5, 5, 4, 7, 6, 7, 9, 13, 10, 13, 11, 11, 9, 12, 13, 16, 14, 21, 21, 17, 22, 30, 27, 29, 29, 29, 32, 29, 32, 31, 33, 33, 36, 40, 33, 35, 36, 39, 38, 37, 40, 39, 33, 42, 41, 42, 44, 46, 47, 48, 52, 50, 50, 57, 53, 60, 58, 59, 56, 52, 55, 61, 55, 50, 57, 63, 65, 64, 62, 60, 63, 63, 66, 65, 65, 69, 68, 69, 65, 67, 72, 71, 76, 74, 74, 80, 74, 73, 65, 68, 68, 64, 60, 65, 68, 61, 62, 65, 65, 71, 75, 77, 72, 70, 72, 72, 79, 86, 87, 81, 82, 86, 88, 89, 86, 79, 80, 86, 83, 87, 86, 83, 76, 70, 80, 79, 86, 86, 87, 88, 89, 84, 92, 85, 94, 87, 94, 95, 91, 94, 92, 93, 93, 90, 93, 89, 94, 95, 90, 94, 95, 96, 95, 96, 92, 95, 96, 93, 96, 91, 95, 94, 101, 103, 95, 94, 91, 90, 95, 87, 90, 90, 86, 86, 84, 90, 83, 85, 78, 80, 82, 87, 80, 85, 84, 76, 79, 72, 77, 78, 67, 80, 83, 85, 83, 79, 78, 74, 75, 69, 66, 64, 67, 62, 66, 65, 64, 63, 59, 66, 60, 60, 54, 57, 48, 57, 57, 53, 56, 51, 50, 53, 49, 47, 46, 55, 54, 47, 53, 51, 46, 39, 43, 44, 44, 41, 37, 39, 45, 37, 33, 34, 32, 32, 32, 34, 30, 30, 25, 28, 27, 27, 26, 24, 21, 7, 6, 6, 5, 4, 6, 6, 7, 8, 13, 10, 11, 12, 13, 13, 10, 15, 14, 17, 15, 23, 17, 20, 21, 24, 28, 30, 28, 23, 28, 31, 31, 34, 33, 34, 36, 40, 36, 33, 37, 43, 40, 36, 33, 42, 36, 41, 41, 43, 43, 48, 46, 47, 47, 48, 49, 50, 50, 55, 57, 56, 53, 52, 55, 58, 50, 48, 61, 65, 63, 64, 64, 60, 60, 66, 62, 68, 68, 62, 67, 67, 66, 69, 75, 73, 72, 73, 78, 75, 73, 73, 71, 74, 72, 70, 65, 63, 58, 59, 62, 63, 63, 66, 64, 75, 76, 69, 69, 73, 81, 83, 82, 86, 82, 81, 83, 87, 87, 80, 75, 81, 86, 85, 84, 90, 77, 70, 75, 80, 88, 88, 89, 84, 86, 85, 89, 86, 92, 90, 92, 89, 89, 90, 94, 93, 89, 93, 88, 92, 94, 93, 88, 90, 93, 92, 92, 94, 91, 93, 94, 97, 100, 95, 92, 93, 101, 93, 91, 95, 89, 87, 92, 82, 91, 96, 88, 87, 85, 86, 82, 83, 86, 80, 82, 87, 80, 84, 84, 82, 81, 80, 82, 80, 83, 83, 79, 81, 82, 76, 71, 71, 71, 73, 66, 66, 70, 64, 65, 68, 64, 63, 62, 64, 60, 62, 57, 54, 52, 60, 56, 57, 52, 48, 53, 55, 51, 49, 53, 56, 52, 50, 51, 47, 43, 38, 38, 42, 43, 37, 34, 39, 46, 38, 39, 33, 29, 30, 34, 29, 31, 27, 29, 30, 27, 26, 28, 22, 22, 8, 7, 7, 6, 5, 13, 10, 12, 12, 13, 14, 12, 12, 13, 13, 10, 16, 15, 17, 14, 20, 17, 22, 20, 22, 23, 25, 28, 26, 27, 30, 31, 32, 32, 33, 32, 38, 37, 35, 36, 39, 38, 39, 32, 39, 37, 40, 39, 37, 40, 43, 43, 48, 49, 51, 48, 49, 53, 52, 56, 57, 55, 56, 57, 57, 55, 53, 58, 62, 61, 63, 65, 63, 62, 63, 64, 67, 65, 63, 66, 67, 69, 70, 72, 72, 72, 75, 76, 79, 76, 70, 67, 70, 68, 66, 64, 66, 61, 63, 66, 60, 60, 60, 60, 66, 69, 65, 69, 74, 76, 79, 80, 80, 81, 82, 80, 84, 87, 78, 74, 79, 82, 81, 79, 82, 80, 82, 81, 88, 90, 91, 88, 83, 90, 88, 83, 88, 87, 87, 88, 93, 92, 91, 93, 89, 89, 90, 88, 96, 93, 92, 89, 92, 90, 91, 91, 92, 91, 92, 93, 98, 94, 96, 97, 96, 94, 93, 93, 93, 90, 86, 89, 87, 89, 90, 88, 88, 86, 86, 85, 84, 86, 84, 81, 85, 84, 85, 83, 83, 85, 82, 81, 82, 87, 86, 79, 76, 75, 72, 68, 70, 67, 72, 63, 66, 70, 65, 67, 67, 67, 66, 62, 65, 60, 62, 60, 54, 54, 56, 54, 57, 54, 54, 57, 55, 51, 49, 51, 51, 51, 48, 48, 45, 40, 40, 40, 40, 40, 37, 37, 39, 41, 36, 38, 33, 33, 32, 36, 28, 35, 28, 31, 29, 28, 26, 29, 24, 26, 8, 7, 7, 7, 6, 13, 10, 12, 12, 15, 19, 15, 12, 13, 13, 10, 14, 15, 15, 16, 18, 17, 18, 20, 27, 21, 24, 29, 30, 30, 33, 32, 31, 34, 33, 32, 36, 35, 37, 34, 38, 37, 42, 37, 39, 38, 40, 40, 37, 42, 41, 43, 46, 48, 47, 45, 51, 55, 55, 54, 56, 54, 56, 55, 55, 54, 53, 56, 59, 61, 62, 64, 64, 63, 64, 64, 65, 65, 66, 67, 66, 67, 69, 69, 71, 70, 73, 72, 75, 72, 73, 73, 74, 74, 71, 69, 67, 60, 63, 67, 60, 61, 60, 60, 64, 68, 68, 71, 74, 75, 80, 79, 79, 82, 79, 76, 79, 81, 79, 76, 77, 80, 76, 82, 83, 83, 84, 85, 90, 86, 88, 82, 81, 89, 87, 82, 86, 83, 84, 83, 89, 87, 92, 92, 89, 89, 88, 87, 92, 89, 93, 91, 90, 85, 88, 88, 90, 92, 94, 95, 100, 97, 96, 97, 93, 90, 90, 92, 89, 90, 87, 86, 89, 90, 86, 88, 90, 87, 88, 89, 89, 87, 86, 86, 85, 86, 85, 81, 79, 85, 81, 80, 85, 82, 81, 78, 75, 74, 73, 73, 71, 68, 66, 63, 66, 68, 66, 68, 66, 66, 65, 62, 62, 58, 63, 63, 58, 55, 60, 57, 56, 57, 59, 56, 54, 51, 49, 47, 49, 50, 43, 45, 46, 44, 45, 45, 40, 42, 38, 36, 37, 39, 37, 35, 34, 34, 34, 32, 30, 35, 30, 33, 32, 34, 31, 30, 23, 28, 7, 7, 8, 9, 7, 9, 12, 14, 17, 21, 16, 15, 17, 11, 14, 16, 13, 17, 16, 23, 21, 19, 25, 19, 25, 29, 31, 31, 33, 31, 33, 35, 34, 36, 36, 35, 37, 37, 38, 41, 42, 39, 41, 39, 37, 39, 41, 42, 36, 42, 43, 47, 46, 42, 53, 54, 57, 52, 55, 53, 54, 54, 57, 57, 53, 56, 56, 60, 60, 61, 63, 64, 65, 61, 64, 66, 64, 67, 64, 64, 67, 67, 68, 67, 70, 70, 74, 68, 74, 72, 72, 71, 73, 72, 72, 68, 63, 63, 57, 58, 59, 61, 62, 66, 72, 71, 75, 77, 79, 75, 77, 78, 72, 76, 77, 76, 78, 74, 76, 83, 79, 82, 85, 84, 85, 86, 89, 85, 85, 83, 86, 86, 83, 83, 81, 84, 86, 86, 86, 87, 88, 91, 90, 84, 88, 84, 87, 87, 94, 92, 88, 85, 87, 88, 92, 91, 92, 90, 96, 98, 95, 96, 93, 88, 87, 90, 85, 89, 87, 87, 89, 88, 87, 90, 88, 87, 87, 89, 89, 85, 86, 86, 85, 86, 86, 81, 83, 83, 82, 82, 86, 80, 82, 79, 76, 71, 68, 75, 70, 71, 63, 65, 66, 68, 68, 67, 65, 64, 67, 64, 63, 59, 66, 63, 60, 56, 63, 58, 58, 61, 58, 56, 54, 52, 50, 49, 52, 51, 44, 44, 48, 49, 46, 45, 42, 42, 38, 35, 36, 40, 32, 34, 36, 36, 38, 30, 35, 36, 33, 33, 32, 34, 30, 27, 26, 30, 6, 6, 9, 13, 10, 8, 11, 14, 16, 18, 20, 16, 18, 19, 14, 21, 22, 20, 21, 19, 30, 27, 21, 20, 20, 22, 27, 30, 28, 29, 30, 34, 36, 34, 37, 39, 36, 39, 41, 37, 42, 41, 43, 42, 42, 38, 40, 46, 42, 38, 46, 44, 46, 44, 43, 52, 52, 54, 53, 56, 54, 54, 56, 51, 55, 52, 55, 59, 59, 57, 58, 62, 64, 61, 61, 62, 64, 62, 62, 63, 64, 62, 65, 65, 68, 69, 70, 73, 69, 71, 69, 73, 72, 74, 73, 75, 76, 75, 69, 62, 61, 64, 59, 58, 59, 65, 67, 73, 74, 77, 73, 76, 75, 73, 72, 67, 74, 72, 72, 77, 82, 80, 81, 85, 81, 81, 83, 84, 84, 81, 81, 84, 81, 82, 84, 77, 80, 83, 86, 86, 86, 80, 85, 90, 89, 87, 84, 88, 88, 91, 93, 85, 86, 87, 86, 92, 89, 91, 92, 96, 95, 91, 92, 90, 89, 90, 91, 87, 89, 91, 92, 92, 87, 85, 88, 85, 85, 86, 88, 91, 90, 83, 84, 86, 86, 87, 85, 87, 83, 84, 85, 81, 78, 80, 77, 75, 72, 68, 70, 68, 71, 66, 68, 66, 68, 69, 66, 62, 64, 65, 61, 63, 63, 67, 64, 61, 60, 60, 56, 60, 63, 59, 55, 55, 52, 50, 53, 54, 52, 49, 49, 50, 48, 47, 43, 42, 41, 40, 38, 37, 39, 34, 38, 37, 35, 36, 34, 33, 33, 31, 31, 33, 31, 30, 28, 27, 29, 6, 6, 9, 9, 9, 13, 10, 13, 15, 15, 18, 17, 17, 15, 16, 23, 23, 26, 27, 24, 30, 28, 23, 22, 24, 23, 24, 24, 24, 32, 32, 33, 38, 37, 34, 43, 39, 44, 43, 36, 41, 38, 49, 44, 42, 41, 40, 42, 40, 38, 47, 48, 50, 52, 45, 52, 54, 51, 52, 52, 53, 50, 53, 54, 56, 56, 61, 60, 59, 56, 55, 58, 59, 63, 62, 64, 69, 67, 58, 60, 63, 60, 71, 65, 67, 66, 66, 66, 67, 67, 67, 71, 73, 76, 76, 78, 75, 74, 73, 74, 66, 64, 60, 60, 60, 60, 62, 68, 73, 79, 70, 71, 71, 75, 67, 64, 67, 71, 70, 72, 77, 80, 82, 78, 74, 72, 80, 81, 84, 82, 80, 87, 81, 83, 80, 79, 82, 82, 82, 82, 86, 81, 83, 81, 85, 91, 87, 83, 86, 91, 95, 90, 91, 88, 90, 94, 88, 90, 93, 91, 94, 88, 84, 91, 97, 86, 90, 93, 91, 97, 92, 92, 89, 88, 89, 87, 86, 87, 91, 90, 83, 79, 86, 84, 83, 87, 85, 85, 84, 82, 86, 77, 77, 78, 75, 70, 69, 70, 65, 67, 69, 69, 70, 66, 69, 71, 68, 68, 64, 64, 65, 66, 65, 63, 64, 65, 65, 61, 58, 64, 62, 60, 54, 55, 50, 49, 56, 58, 50, 50, 52, 52, 43, 49, 47, 41, 41, 39, 36, 35, 39, 36, 39, 38, 38, 35, 41, 30, 33, 29, 30, 34, 30, 28, 26, 30, 30, 5, 14, 8, 8, 16, 8, 11, 15, 13, 16, 18, 16, 17, 19, 19, 19, 23, 21, 24, 27, 21, 22, 25, 26, 27, 28, 27, 29, 32, 29, 30, 36, 34, 34, 38, 41, 44, 40, 42, 45, 46, 46, 48, 43, 40, 44, 43, 39, 42, 43, 45, 48, 50, 43, 51, 50, 55, 53, 54, 52, 54, 52, 55, 58, 57, 59, 58, 58, 56, 57, 62, 64, 62, 68, 63, 67, 64, 59, 64, 65, 66, 68, 69, 64, 69, 71, 70, 73, 69, 71, 73, 69, 74, 75, 71, 77, 74, 70, 71, 68, 61, 60, 63, 64, 65, 59, 64, 71, 73, 75, 70, 69, 79, 73, 67, 67, 69, 67, 70, 70, 74, 71, 73, 75, 77, 78, 79, 78, 79, 81, 83, 87, 87, 84, 87, 85, 83, 81, 84, 81, 82, 84, 80, 80, 89, 90, 88, 92, 86, 96, 92, 89, 90, 86, 84, 86, 89, 94, 87, 88, 89, 86, 90, 99, 91, 94, 93, 97, 92, 97, 95, 93, 90, 88, 91, 89, 93, 92, 91, 88, 88, 88, 89, 86, 86, 87, 83, 85, 83, 85, 81, 80, 78, 72, 70, 66, 68, 66, 69, 67, 67, 73, 72, 69, 71, 70, 68, 70, 68, 64, 61, 62, 58, 59, 59, 66, 59, 59, 60, 60, 60, 57, 60, 52, 52, 55, 53, 54, 53, 51, 51, 47, 45, 45, 40, 42, 43, 40, 39, 38, 40, 41, 41, 40, 36, 39, 31, 32, 41, 27, 32, 31, 26, 30, 31, 30, 5, 13, 9, 8, 15, 11, 12, 14, 15, 18, 17, 15, 20, 21, 18, 18, 22, 23, 26, 25, 23, 22, 25, 25, 27, 29, 31, 33, 29, 31, 30, 32, 35, 37, 36, 44, 42, 44, 44, 44, 44, 49, 48, 47, 42, 46, 42, 39, 43, 48, 47, 51, 50, 48, 55, 56, 53, 55, 53, 57, 57, 56, 53, 56, 56, 59, 60, 53, 58, 59, 64, 64, 63, 65, 66, 69, 66, 71, 70, 68, 72, 72, 73, 69, 69, 72, 74, 74, 70, 73, 75, 71, 75, 72, 71, 75, 79, 76, 75, 72, 65, 65, 68, 65, 66, 61, 59, 69, 69, 71, 68, 70, 74, 70, 72, 72, 70, 70, 73, 69, 74, 75, 78, 78, 83, 79, 81, 83, 83, 84, 84, 87, 84, 84, 86, 86, 85, 85, 86, 86, 87, 83, 79, 86, 88, 92, 92, 90, 89, 89, 93, 89, 90, 86, 89, 84, 86, 87, 87, 89, 88, 96, 92, 97, 97, 95, 93, 97, 91, 93, 96, 90, 93, 91, 92, 96, 91, 91, 89, 93, 92, 89, 89, 86, 87, 90, 88, 80, 81, 83, 84, 81, 80, 79, 74, 72, 67, 71, 76, 75, 74, 75, 70, 70, 74, 73, 70, 70, 68, 63, 60, 64, 58, 59, 60, 56, 57, 60, 59, 59, 61, 59, 59, 59, 59, 56, 54, 57, 52, 51, 51, 46, 47, 44, 45, 44, 45, 44, 40, 39, 43, 40, 42, 41, 35, 33, 31, 38, 39, 32, 32, 33, 32, 33, 34, 32, 6, 13, 8, 7, 13, 12, 12, 12, 17, 18, 16, 17, 19, 21, 18, 21, 23, 25, 25, 25, 26, 26, 27, 25, 28, 30, 32, 31, 33, 32, 34, 33, 38, 38, 38, 44, 40, 45, 47, 45, 46, 50, 48, 54, 47, 48, 44, 44, 47, 54, 50, 53, 51, 51, 55, 62, 57, 57, 52, 59, 60, 60, 56, 61, 62, 57, 59, 56, 61, 59, 64, 65, 61, 65, 69, 69, 71, 73, 74, 73, 76, 74, 74, 73, 74, 73, 75, 76, 75, 77, 79, 75, 80, 75, 73, 77, 82, 80, 80, 78, 75, 72, 73, 64, 68, 68, 65, 67, 71, 68, 66, 68, 71, 71, 73, 74, 70, 71, 75, 79, 78, 79, 86, 86, 88, 84, 86, 86, 87, 87, 85, 86, 85, 88, 83, 87, 83, 85, 87, 89, 87, 86, 85, 88, 86, 86, 94, 92, 95, 89, 92, 88, 87, 88, 92, 90, 90, 88, 89, 95, 90, 98, 95, 95, 98, 96, 95, 95, 92, 96, 96, 91, 93, 94, 90, 94, 89, 89, 94, 92, 94, 91, 90, 88, 90, 91, 89, 84, 80, 84, 80, 78, 81, 77, 75, 75, 75, 76, 78, 80, 81, 78, 69, 72, 75, 73, 73, 70, 69, 65, 61, 72, 65, 63, 63, 56, 59, 60, 59, 61, 59, 58, 59, 60, 57, 54, 53, 55, 53, 50, 49, 50, 55, 49, 47, 44, 45, 46, 40, 41, 43, 42, 42, 40, 36, 34, 34, 40, 36, 34, 34, 36, 34, 34, 32, 30, 5, 12, 9, 8, 12, 11, 13, 10, 12, 16, 18, 18, 20, 21, 19, 17, 22, 24, 26, 25, 29, 29, 29, 28, 31, 25, 33, 34, 31, 35, 35, 35, 33, 40, 41, 43, 40, 41, 41, 46, 46, 47, 48, 52, 55, 51, 49, 48, 48, 50, 57, 54, 54, 54, 54, 55, 61, 60, 60, 55, 59, 60, 59, 58, 65, 66, 60, 61, 59, 61, 61, 61, 62, 63, 67, 71, 69, 74, 72, 74, 74, 74, 74, 73, 76, 78, 77, 76, 76, 76, 81, 77, 79, 78, 78, 79, 78, 83, 82, 84, 78, 80, 77, 74, 72, 75, 75, 75, 68, 77, 73, 67, 67, 74, 76, 78, 82, 75, 76, 78, 87, 86, 87, 89, 91, 90, 90, 91, 87, 89, 89, 90, 87, 86, 91, 85, 89, 86, 87, 88, 90, 93, 93, 88, 91, 85, 85, 98, 97, 97, 91, 93, 93, 89, 95, 94, 95, 92, 94, 95, 98, 95, 96, 98, 95, 94, 95, 93, 93, 95, 95, 93, 97, 95, 93, 93, 92, 89, 88, 89, 89, 93, 91, 92, 88, 89, 92, 92, 87, 84, 86, 80, 81, 81, 80, 85, 81, 82, 80, 83, 82, 82, 80, 73, 73, 77, 72, 78, 73, 70, 65, 64, 71, 68, 64, 63, 61, 63, 60, 61, 63, 59, 60, 61, 57, 56, 53, 50, 53, 54, 50, 49, 53, 56, 52, 49, 46, 44, 44, 40, 43, 40, 43, 43, 37, 39, 39, 38, 40, 34, 32, 36, 36, 36, 36, 30, 31, 6, 11, 8, 8, 14, 12, 13, 10, 14, 16, 16, 14, 16, 20, 19, 18, 20, 24, 27, 27, 27, 29, 35, 30, 30, 25, 35, 33, 37, 32, 35, 36, 35, 39, 40, 46, 36, 42, 40, 49, 46, 45, 47, 54, 51, 51, 51, 52, 48, 50, 56, 58, 56, 55, 55, 55, 54, 58, 59, 56, 60, 60, 56, 65, 67, 67, 69, 68, 67, 64, 66, 65, 67, 66, 63, 69, 69, 74, 68, 74, 76, 71, 73, 77, 80, 78, 78, 76, 81, 79, 79, 78, 81, 80, 79, 79, 84, 81, 86, 89, 84, 88, 82, 73, 76, 82, 79, 75, 70, 76, 79, 76, 76, 80, 79, 81, 86, 80, 85, 88, 94, 97, 101, 94, 95, 95, 92, 93, 93, 90, 85, 91, 88, 91, 95, 92, 93, 96, 95, 93, 97, 96, 94, 92, 89, 91, 91, 94, 97, 97, 94, 95, 94, 92, 99, 94, 99, 95, 96, 101, 98, 96, 93, 96, 96, 94, 93, 88, 93, 96, 93, 92, 98, 95, 92, 97, 93, 95, 91, 92, 93, 93, 88, 87, 84, 86, 91, 92, 87, 87, 83, 80, 79, 82, 84, 89, 86, 86, 85, 84, 81, 80, 79, 79, 76, 80, 76, 82, 75, 70, 66, 69, 67, 72, 68, 64, 65, 64, 62, 61, 61, 62, 62, 61, 59, 59, 53, 53, 58, 54, 52, 52, 55, 53, 54, 50, 47, 45, 43, 42, 46, 42, 41, 45, 39, 41, 38, 38, 42, 35, 33, 38, 36, 40, 36, 30, 35, 6, 11, 7, 6, 14, 14, 11, 17, 17, 19, 18, 19, 16, 16, 19, 20, 24, 28, 28, 30, 28, 31, 30, 33, 31, 30, 29, 38, 34, 34, 37, 40, 38, 39, 47, 38, 42, 42, 44, 50, 53, 53, 47, 50, 50, 50, 52, 50, 51, 55, 57, 57, 56, 54, 54, 56, 61, 62, 61, 63, 57, 55, 61, 64, 63, 74, 71, 75, 72, 71, 73, 76, 74, 67, 70, 69, 71, 71, 75, 80, 76, 76, 82, 80, 76, 79, 74, 84, 79, 76, 81, 80, 83, 78, 78, 85, 82, 89, 84, 82, 83, 82, 82, 80, 80, 80, 80, 78, 71, 74, 75, 77, 81, 83, 85, 92, 88, 86, 92, 94, 96, 101, 95, 94, 94, 99, 99, 101, 96, 94, 99, 95, 96, 96, 93, 89, 98, 98, 93, 101, 94, 93, 94, 90, 96, 98, 91, 99, 99, 99, 99, 94, 97, 101, 102, 103, 101, 95, 92, 90, 91, 90, 94, 95, 97, 92, 89, 92, 93, 90, 91, 94, 91, 96, 96, 94, 98, 95, 95, 89, 92, 92, 79, 82, 86, 86, 83, 86, 81, 78, 85, 83, 89, 90, 89, 91, 91, 88, 86, 80, 85, 82, 82, 78, 82, 78, 78, 75, 71, 71, 76, 71, 74, 73, 66, 64, 63, 63, 60, 63, 62, 61, 59, 60, 58, 53, 59, 61, 54, 54, 56, 55, 56, 56, 52, 49, 47, 43, 47, 47, 48, 46, 50, 44, 41, 37, 38, 42, 40, 37, 38, 38, 38, 33, 36, 39, 5, 11, 8, 7, 14, 13, 13, 10, 18, 16, 17, 14, 13, 15, 17, 21, 20, 27, 28, 28, 30, 31, 32, 33, 34, 31, 27, 32, 32, 34, 36, 35, 40, 41, 44, 45, 40, 41, 43, 43, 53, 51, 52, 51, 54, 50, 51, 53, 53, 55, 55, 53, 57, 57, 48, 48, 58, 62, 62, 64, 62, 56, 61, 59, 67, 68, 73, 71, 72, 75, 73, 75, 74, 76, 75, 79, 79, 83, 81, 77, 80, 85, 83, 82, 79, 80, 83, 84, 88, 82, 90, 88, 88, 87, 87, 95, 91, 82, 88, 83, 86, 86, 87, 86, 85, 84, 79, 83, 88, 88, 91, 91, 93, 94, 100, 96, 104, 103, 92, 98, 106, 100, 101, 102, 99, 98, 101, 100, 101, 95, 102, 102, 101, 106, 101, 103, 96, 106, 108, 105, 99, 95, 96, 97, 96, 97, 101, 100, 104, 97, 99, 105, 103, 103, 105, 113, 102, 104, 100, 99, 101, 97, 93, 96, 94, 99, 95, 94, 90, 90, 88, 89, 97, 94, 96, 95, 96, 95, 93, 92, 97, 92, 79, 87, 90, 91, 88, 90, 88, 77, 75, 82, 84, 92, 93, 91, 89, 88, 85, 90, 78, 86, 83, 81, 76, 80, 78, 79, 75, 71, 73, 78, 70, 70, 72, 63, 59, 65, 64, 63, 67, 64, 64, 59, 60, 60, 58, 59, 58, 55, 59, 59, 55, 56, 56, 54, 52, 50, 44, 51, 48, 52, 53, 53, 45, 40, 40, 41, 38, 44, 37, 36, 40, 34, 34, 39, 38, 9, 13, 14, 14, 12, 17, 15, 22, 20, 20, 16, 18, 16, 21, 21, 20, 29, 26, 28, 30, 29, 28, 31, 37, 40, 31, 32, 33, 36, 37, 37, 38, 44, 48, 48, 39, 41, 45, 46, 52, 51, 53, 50, 55, 53, 52, 57, 57, 56, 57, 52, 56, 58, 56, 55, 62, 65, 65, 65, 62, 61, 65, 65, 67, 77, 73, 75, 72, 76, 75, 78, 80, 83, 80, 77, 80, 83, 83, 82, 87, 84, 86, 83, 85, 83, 83, 85, 91, 90, 94, 93, 87, 92, 94, 95, 95, 89, 86, 91, 92, 88, 87, 92, 96, 99, 89, 93, 84, 90, 92, 96, 101, 100, 105, 102, 105, 106, 103, 100, 101, 104, 104, 104, 107, 113, 112, 108, 107, 106, 107, 105, 110, 106, 108, 105, 106, 109, 111, 108, 103, 99, 106, 101, 99, 103, 104, 109, 104, 101, 102, 103, 105, 102, 103, 107, 110, 106, 107, 104, 102, 105, 98, 94, 99, 97, 96, 95, 94, 90, 96, 98, 102, 95, 94, 96, 94, 97, 93, 97, 91, 89, 78, 94, 89, 86, 89, 89, 91, 82, 77, 85, 90, 94, 93, 91, 87, 86, 83, 86, 83, 83, 80, 78, 77, 83, 76, 78, 74, 73, 79, 75, 72, 71, 68, 61, 68, 66, 62, 63, 64, 66, 63, 61, 63, 60, 60, 60, 61, 58, 57, 53, 53, 56, 58, 55, 50, 52, 50, 50, 51, 53, 53, 54, 44, 40, 42, 46, 41, 43, 41, 38, 41, 38, 41, 42, 41, 13, 15, 15, 14, 13, 17, 16, 22, 21, 19, 19, 21, 21, 23, 25, 28, 27, 24, 28, 27, 29, 29, 30, 34, 38, 34, 33, 31, 39, 38, 36, 38, 42, 51, 53, 46, 47, 51, 49, 50, 48, 51, 51, 53, 54, 53, 58, 58, 60, 61, 59, 56, 56, 61, 63, 69, 71, 64, 63, 64, 65, 67, 68, 66, 74, 75, 74, 73, 76, 77, 76, 79, 84, 84, 81, 81, 89, 86, 83, 86, 84, 88, 88, 85, 90, 86, 87, 89, 93, 91, 92, 92, 94, 94, 92, 95, 91, 94, 99, 98, 94, 95, 99, 100, 105, 109, 104, 92, 99, 108, 107, 110, 113, 113, 110, 110, 108, 106, 105, 103, 105, 106, 109, 113, 113, 115, 115, 110, 106, 108, 110, 111, 109, 110, 107, 108, 114, 116, 111, 108, 108, 109, 105, 99, 105, 112, 110, 114, 110, 108, 106, 104, 106, 106, 109, 111, 108, 110, 109, 103, 102, 103, 97, 98, 98, 97, 96, 97, 95, 100, 102, 105, 94, 100, 99, 97, 98, 98, 100, 93, 93, 95, 97, 93, 92, 94, 91, 86, 86, 88, 98, 95, 94, 95, 91, 88, 90, 84, 86, 82, 83, 75, 76, 79, 82, 75, 80, 77, 78, 77, 73, 73, 72, 70, 61, 69, 67, 65, 66, 69, 64, 61, 60, 62, 61, 62, 59, 62, 62, 58, 53, 57, 60, 64, 57, 53, 54, 54, 53, 56, 52, 53, 52, 45, 42, 43, 46, 45, 45, 43, 40, 41, 42, 43, 38, 38, 14, 13, 10, 15, 15, 14, 16, 16, 22, 22, 21, 18, 17, 23, 22, 25, 31, 28, 25, 26, 25, 26, 30, 33, 34, 38, 34, 33, 30, 39, 37, 39, 41, 40, 49, 53, 50, 50, 51, 49, 50, 51, 52, 51, 55, 55, 50, 55, 57, 66, 63, 60, 55, 58, 65, 66, 72, 71, 69, 67, 67, 68, 70, 67, 69, 72, 74, 72, 76, 76, 77, 75, 81, 86, 84, 84, 86, 90, 91, 86, 88, 89, 91, 92, 88, 90, 89, 92, 88, 95, 93, 94, 92, 94, 93, 90, 94, 93, 99, 101, 101, 99, 103, 102, 103, 107, 116, 114, 112, 114, 118, 114, 114, 117, 116, 117, 114, 113, 112, 111, 106, 108, 106, 115, 113, 114, 118, 115, 112, 109, 110, 114, 111, 110, 108, 110, 109, 112, 114, 114, 114, 111, 106, 106, 106, 110, 115, 112, 119, 115, 109, 109, 107, 109, 108, 110, 109, 111, 113, 113, 107, 103, 107, 107, 104, 103, 101, 99, 102, 100, 101, 105, 104, 96, 104, 98, 100, 100, 99, 97, 100, 102, 101, 100, 98, 100, 96, 92, 80, 93, 99, 102, 98, 92, 97, 90, 88, 91, 86, 91, 85, 85, 77, 77, 77, 78, 76, 85, 81, 81, 79, 71, 76, 71, 74, 66, 72, 71, 69, 66, 69, 65, 64, 64, 67, 58, 59, 63, 64, 58, 60, 57, 61, 62, 66, 58, 56, 57, 57, 52, 56, 48, 54, 52, 48, 44, 45, 48, 45, 43, 43, 43, 45, 43, 42, 38, 37, 11, 7, 14, 14, 16, 16, 18, 21, 21, 21, 19, 17, 25, 21, 24, 30, 29, 25, 26, 26, 27, 30, 37, 37, 38, 33, 36, 35, 38, 40, 39, 41, 42, 49, 49, 46, 46, 48, 51, 51, 54, 52, 50, 49, 51, 47, 57, 63, 63, 63, 62, 56, 58, 67, 67, 73, 72, 75, 70, 69, 68, 70, 66, 69, 70, 74, 74, 77, 75, 78, 77, 83, 82, 90, 84, 87, 89, 88, 85, 85, 90, 89, 93, 93, 91, 86, 90, 93, 101, 94, 95, 94, 92, 90, 89, 94, 96, 103, 100, 100, 100, 100, 101, 106, 107, 114, 116, 116, 112, 112, 114, 118, 118, 119, 118, 118, 117, 116, 117, 112, 117, 116, 121, 115, 120, 124, 119, 120, 114, 114, 116, 116, 116, 112, 117, 115, 113, 113, 117, 115, 115, 112, 109, 112, 115, 118, 117, 118, 116, 110, 116, 115, 115, 107, 110, 111, 114, 110, 110, 106, 105, 105, 113, 110, 111, 109, 104, 103, 105, 99, 105, 104, 103, 106, 98, 104, 104, 103, 96, 100, 106, 101, 101, 99, 100, 96, 92, 86, 101, 101, 96, 103, 94, 93, 87, 91, 92, 92, 89, 88, 88, 86, 80, 77, 76, 80, 88, 85, 81, 80, 73, 80, 79, 74, 66, 75, 72, 71, 68, 68, 72, 71, 71, 66, 59, 64, 67, 63, 58, 61, 61, 60, 60, 60, 54, 55, 55, 54, 49, 51, 47, 55, 55, 53, 49, 48, 49, 47, 43, 47, 46, 42, 41, 41, 42, 39, 13, 10, 11, 13, 13, 19, 17, 21, 21, 19, 19, 21, 24, 25, 22, 27, 29, 27, 27, 29, 31, 29, 31, 34, 37, 37, 33, 38, 36, 31, 39, 39, 39, 42, 47, 46, 45, 47, 50, 54, 53, 58, 54, 52, 58, 57, 51, 55, 59, 58, 60, 60, 59, 60, 64, 71, 73, 75, 74, 70, 70, 69, 69, 72, 69, 76, 75, 80, 77, 76, 78, 81, 83, 83, 92, 86, 89, 86, 86, 87, 88, 93, 88, 91, 94, 92, 88, 92, 99, 100, 92, 96, 97, 99, 93, 90, 90, 100, 106, 100, 100, 99, 110, 108, 107, 108, 115, 114, 115, 116, 114, 118, 120, 114, 119, 120, 118, 118, 119, 118, 117, 127, 121, 124, 124, 120, 120, 121, 124, 121, 121, 118, 122, 120, 117, 118, 118, 118, 117, 116, 116, 115, 114, 111, 122, 117, 125, 123, 122, 122, 115, 121, 119, 121, 111, 115, 114, 112, 109, 112, 107, 108, 108, 112, 110, 113, 115, 111, 108, 107, 106, 111, 111, 105, 108, 103, 104, 106, 101, 99, 102, 112, 101, 106, 97, 97, 96, 94, 95, 102, 99, 94, 100, 90, 87, 91, 97, 90, 95, 87, 91, 85, 83, 78, 79, 80, 87, 82, 87, 80, 78, 78, 83, 78, 71, 65, 69, 72, 70, 74, 72, 72, 68, 68, 66, 62, 63, 66, 60, 62, 64, 69, 65, 61, 59, 57, 53, 51, 51, 50, 52, 57, 59, 56, 52, 48, 52, 50, 54, 48, 52, 48, 44, 46, 43, 43, 43, 13, 14, 13, 13, 17, 16, 21, 23, 20, 21, 22, 25, 24, 23, 27, 27, 25, 30, 32, 32, 29, 28, 31, 38, 37, 37, 42, 39, 33, 38, 42, 47, 46, 52, 55, 50, 47, 51, 52, 50, 56, 52, 50, 58, 55, 54, 56, 59, 62, 61, 59, 58, 56, 59, 70, 67, 74, 72, 70, 73, 71, 69, 70, 74, 79, 82, 83, 79, 77, 78, 85, 81, 88, 92, 86, 89, 88, 84, 88, 90, 92, 89, 91, 91, 94, 95, 99, 102, 98, 95, 100, 93, 99, 98, 102, 102, 105, 107, 102, 105, 100, 106, 107, 108, 104, 112, 115, 116, 118, 113, 119, 118, 112, 119, 123, 119, 120, 118, 118, 120, 131, 123, 123, 124, 117, 123, 124, 123, 120, 120, 114, 123, 122, 121, 113, 113, 114, 118, 117, 118, 121, 121, 114, 115, 113, 119, 121, 120, 121, 120, 126, 119, 121, 118, 122, 116, 120, 119, 113, 112, 110, 108, 108, 117, 111, 111, 113, 115, 111, 113, 115, 115, 108, 112, 107, 105, 108, 104, 106, 105, 106, 103, 108, 99, 96, 96, 97, 104, 106, 97, 98, 95, 93, 90, 94, 89, 87, 93, 91, 93, 86, 84, 84, 84, 81, 86, 79, 81, 78, 81, 81, 84, 79, 74, 75, 70, 74, 71, 71, 74, 69, 68, 69, 70, 66, 63, 69, 60, 59, 63, 69, 67, 62, 60, 59, 56, 55, 58, 59, 57, 58, 57, 59, 53, 49, 55, 53, 57, 51, 48, 48, 45, 47, 43, 46, 46, 14, 14, 15, 16, 15, 17, 21, 22, 20, 20, 21, 26, 25, 26, 26, 26, 25, 29, 32, 30, 29, 29, 28, 38, 40, 42, 43, 37, 30, 35, 41, 46, 45, 54, 51, 48, 45, 55, 55, 54, 60, 56, 53, 57, 52, 54, 53, 58, 60, 61, 61, 62, 62, 62, 70, 64, 71, 72, 72, 74, 73, 69, 71, 82, 81, 81, 77, 80, 77, 76, 83, 81, 90, 93, 86, 87, 90, 84, 88, 92, 91, 88, 91, 93, 95, 94, 95, 101, 99, 96, 101, 98, 98, 98, 107, 111, 109, 108, 106, 106, 106, 112, 107, 108, 102, 111, 113, 116, 115, 116, 115, 115, 115, 120, 123, 119, 117, 116, 121, 123, 124, 125, 123, 122, 124, 120, 125, 123, 119, 122, 124, 127, 124, 122, 115, 114, 115, 124, 122, 121, 119, 120, 117, 119, 117, 118, 122, 118, 121, 116, 125, 122, 125, 123, 123, 118, 125, 121, 119, 120, 119, 112, 113, 111, 113, 116, 117, 114, 117, 113, 116, 115, 114, 112, 110, 107, 112, 104, 108, 109, 103, 105, 104, 100, 98, 96, 101, 101, 100, 91, 98, 99, 95, 89, 89, 85, 89, 94, 93, 89, 90, 86, 84, 83, 83, 85, 80, 80, 81, 84, 82, 82, 82, 78, 79, 74, 74, 72, 68, 74, 70, 69, 70, 66, 66, 65, 67, 59, 62, 65, 66, 66, 61, 63, 62, 60, 59, 60, 62, 56, 58, 57, 57, 51, 48, 54, 54, 56, 52, 49, 50, 48, 46, 48, 46, 42, 11, 15, 16, 18, 16, 19, 20, 20, 19, 18, 20, 27, 26, 27, 29, 27, 27, 24, 27, 25, 30, 33, 29, 35, 40, 39, 42, 39, 33, 34, 41, 42, 44, 52, 48, 47, 46, 54, 55, 57, 62, 53, 54, 55, 56, 55, 54, 59, 63, 61, 63, 64, 67, 69, 71, 72, 70, 69, 72, 70, 72, 74, 76, 80, 87, 81, 79, 77, 77, 77, 78, 83, 89, 93, 91, 90, 88, 87, 91, 95, 91, 90, 95, 99, 100, 95, 100, 102, 99, 104, 108, 102, 99, 101, 106, 108, 110, 109, 107, 102, 109, 109, 109, 108, 103, 111, 114, 117, 114, 117, 112, 115, 117, 118, 122, 114, 116, 117, 124, 123, 121, 124, 123, 118, 121, 121, 123, 123, 122, 124, 128, 127, 126, 121, 119, 115, 119, 120, 123, 127, 116, 117, 115, 120, 120, 124, 121, 116, 124, 118, 119, 120, 121, 125, 123, 122, 123, 122, 122, 117, 121, 113, 117, 116, 118, 120, 117, 110, 117, 115, 118, 117, 116, 107, 110, 108, 114, 105, 110, 108, 103, 107, 105, 101, 98, 97, 100, 101, 97, 92, 98, 106, 95, 93, 88, 87, 88, 93, 89, 87, 88, 87, 87, 82, 88, 88, 85, 87, 84, 85, 83, 86, 84, 85, 80, 75, 79, 74, 72, 73, 74, 71, 72, 68, 70, 70, 67, 61, 62, 65, 64, 63, 60, 64, 62, 61, 57, 55, 59, 55, 59, 58, 53, 52, 53, 48, 52, 55, 56, 49, 48, 50, 48, 49, 47, 40, 12, 15, 13, 18, 17, 19, 22, 23, 20, 20, 19, 26, 25, 27, 29, 29, 25, 24, 23, 27, 31, 30, 29, 37, 39, 40, 41, 39, 41, 40, 40, 36, 47, 50, 53, 45, 48, 53, 55, 54, 62, 52, 54, 58, 61, 59, 55, 56, 61, 60, 65, 66, 67, 68, 71, 74, 71, 70, 76, 72, 73, 73, 74, 81, 86, 80, 81, 76, 77, 80, 81, 86, 89, 94, 89, 91, 88, 89, 91, 97, 95, 94, 95, 97, 96, 98, 101, 100, 99, 103, 104, 102, 102, 98, 107, 108, 109, 107, 105, 102, 108, 107, 110, 108, 108, 112, 112, 115, 112, 111, 108, 116, 117, 118, 116, 117, 116, 117, 121, 119, 121, 121, 127, 118, 122, 125, 122, 121, 123, 125, 124, 128, 127, 122, 123, 120, 124, 122, 126, 129, 121, 118, 118, 121, 116, 117, 119, 115, 121, 119, 120, 119, 123, 131, 121, 124, 122, 124, 115, 111, 113, 111, 116, 118, 115, 122, 116, 111, 117, 119, 116, 114, 114, 111, 107, 110, 112, 110, 112, 107, 103, 105, 101, 99, 98, 105, 101, 101, 98, 98, 98, 101, 94, 97, 93, 95, 95, 88, 90, 89, 87, 86, 89, 86, 90, 90, 84, 90, 84, 86, 86, 85, 84, 88, 81, 81, 85, 75, 77, 72, 80, 74, 72, 73, 73, 73, 69, 67, 65, 72, 65, 62, 64, 63, 63, 62, 61, 55, 57, 57, 61, 59, 56, 56, 58, 49, 56, 55, 57, 51, 49, 47, 50, 47, 48, 42, 16, 17, 14, 18, 17, 19, 22, 25, 21, 22, 21, 26, 25, 28, 29, 29, 23, 25, 24, 31, 30, 28, 30, 39, 39, 35, 40, 41, 42, 45, 40, 33, 43, 48, 52, 44, 45, 50, 52, 54, 60, 58, 57, 62, 58, 62, 62, 58, 62, 62, 65, 67, 67, 65, 72, 69, 69, 71, 74, 68, 73, 76, 76, 87, 79, 75, 78, 79, 79, 84, 87, 89, 83, 91, 90, 88, 84, 93, 94, 102, 100, 93, 90, 97, 94, 95, 94, 101, 95, 101, 98, 103, 101, 94, 105, 109, 111, 106, 105, 103, 108, 106, 109, 110, 113, 115, 112, 115, 108, 108, 100, 112, 121, 120, 117, 122, 112, 118, 123, 114, 122, 122, 126, 118, 126, 125, 125, 122, 125, 127, 124, 126, 126, 126, 124, 122, 123, 122, 123, 125, 122, 117, 121, 119, 116, 113, 121, 121, 117, 119, 122, 119, 123, 132, 123, 123, 121, 122, 115, 108, 114, 113, 113, 114, 117, 118, 112, 109, 116, 118, 123, 116, 115, 117, 107, 111, 115, 113, 114, 110, 104, 101, 101, 104, 105, 107, 102, 103, 101, 101, 98, 99, 97, 93, 99, 96, 96, 90, 93, 92, 88, 91, 90, 91, 89, 92, 88, 90, 87, 86, 85, 80, 86, 89, 82, 80, 83, 77, 81, 75, 83, 79, 72, 74, 75, 73, 67, 69, 69, 72, 71, 65, 66, 61, 62, 65, 61, 57, 61, 58, 62, 61, 57, 59, 57, 54, 56, 56, 56, 56, 51, 47, 49, 51, 47, 42, 17, 15, 15, 18, 18, 21, 22, 24, 20, 22, 22, 23, 24, 26, 26, 27, 21, 27, 26, 29, 28, 32, 28, 33, 41, 36, 40, 40, 40, 44, 45, 44, 39, 46, 50, 50, 41, 50, 50, 53, 51, 56, 53, 58, 59, 66, 67, 67, 65, 64, 65, 65, 68, 65, 68, 72, 65, 74, 76, 76, 78, 74, 81, 79, 80, 75, 76, 78, 78, 81, 86, 85, 84, 90, 90, 86, 83, 90, 90, 88, 90, 94, 90, 94, 89, 92, 97, 102, 93, 101, 98, 97, 100, 100, 104, 108, 111, 106, 111, 107, 108, 108, 106, 109, 114, 114, 111, 116, 111, 106, 110, 116, 124, 116, 112, 119, 121, 125, 123, 119, 119, 119, 120, 119, 126, 125, 127, 126, 127, 126, 128, 124, 125, 129, 123, 121, 125, 118, 121, 124, 119, 122, 117, 119, 121, 122, 125, 124, 121, 123, 124, 125, 124, 128, 128, 124, 124, 122, 122, 109, 115, 112, 115, 110, 114, 116, 112, 110, 111, 112, 116, 116, 113, 116, 114, 116, 118, 115, 112, 109, 108, 96, 104, 107, 109, 106, 102, 102, 107, 104, 96, 98, 101, 96, 105, 96, 94, 96, 92, 93, 88, 92, 88, 92, 88, 94, 94, 93, 88, 85, 89, 85, 92, 89, 83, 81, 80, 78, 79, 81, 81, 84, 76, 72, 74, 75, 71, 64, 69, 70, 69, 69, 72, 67, 66, 67, 60, 58, 62, 60, 64, 61, 55, 57, 56, 60, 48, 57, 55, 56, 49, 50, 46, 53, 49, 46, 17, 15, 19, 19, 19, 21, 20, 21, 20, 21, 19, 20, 24, 28, 26, 27, 24, 29, 29, 26, 29, 31, 31, 35, 41, 41, 41, 41, 45, 42, 44, 48, 42, 51, 49, 51, 46, 51, 51, 56, 49, 55, 54, 56, 64, 62, 65, 64, 66, 64, 64, 64, 66, 68, 69, 73, 71, 75, 74, 71, 75, 77, 80, 78, 80, 75, 77, 81, 80, 82, 87, 87, 90, 91, 89, 85, 86, 91, 93, 93, 89, 93, 93, 91, 90, 94, 101, 99, 97, 103, 98, 97, 101, 104, 104, 109, 107, 106, 114, 110, 110, 111, 107, 110, 113, 115, 114, 112, 113, 111, 114, 113, 119, 119, 117, 115, 119, 120, 121, 122, 121, 119, 119, 120, 117, 123, 125, 128, 128, 124, 129, 127, 120, 128, 127, 124, 123, 121, 122, 125, 122, 123, 122, 120, 122, 125, 126, 124, 121, 122, 123, 123, 121, 125, 122, 122, 123, 122, 124, 115, 119, 117, 119, 116, 113, 121, 118, 117, 115, 118, 113, 118, 116, 114, 115, 115, 116, 115, 112, 111, 108, 100, 108, 108, 111, 108, 105, 102, 103, 100, 96, 105, 101, 100, 96, 97, 95, 100, 94, 94, 89, 91, 89, 93, 88, 92, 91, 97, 90, 87, 90, 87, 88, 88, 84, 85, 82, 77, 75, 81, 81, 80, 77, 73, 72, 72, 75, 70, 73, 72, 68, 69, 68, 69, 67, 67, 61, 57, 60, 64, 62, 61, 58, 53, 52, 57, 51, 59, 51, 54, 47, 50, 44, 53, 50, 49, 17, 14, 22, 20, 20, 22, 21, 20, 21, 23, 20, 21, 23, 28, 25, 27, 27, 29, 29, 27, 33, 32, 38, 38, 40, 43, 39, 42, 47, 42, 44, 44, 46, 50, 50, 50, 50, 52, 54, 58, 53, 57, 56, 55, 61, 60, 61, 61, 63, 63, 65, 63, 62, 70, 74, 71, 73, 72, 74, 74, 75, 72, 75, 82, 76, 80, 79, 77, 74, 77, 81, 86, 92, 91, 85, 86, 88, 91, 95, 98, 88, 91, 96, 93, 94, 93, 102, 99, 102, 104, 103, 102, 105, 103, 100, 103, 106, 107, 110, 112, 110, 106, 109, 110, 115, 116, 118, 112, 115, 120, 116, 113, 115, 116, 117, 113, 118, 119, 121, 121, 122, 124, 123, 119, 112, 119, 124, 125, 128, 128, 124, 129, 124, 125, 128, 123, 122, 123, 126, 125, 124, 122, 126, 123, 125, 128, 130, 127, 121, 125, 124, 124, 127, 129, 122, 122, 119, 121, 122, 121, 125, 122, 123, 121, 120, 123, 121, 117, 115, 116, 115, 117, 117, 117, 114, 113, 116, 113, 109, 111, 108, 107, 109, 111, 113, 105, 101, 101, 102, 105, 98, 105, 99, 102, 96, 97, 96, 100, 102, 91, 97, 95, 91, 97, 91, 91, 93, 94, 92, 90, 94, 88, 89, 87, 86, 81, 83, 76, 77, 80, 81, 74, 75, 70, 74, 72, 73, 72, 69, 72, 71, 67, 66, 70, 64, 65, 59, 59, 61, 64, 62, 63, 58, 55, 52, 51, 55, 56, 52, 54, 49, 49, 45, 53, 48, 47, 16, 13, 20, 18, 22, 24, 24, 26, 22, 23, 27, 25, 26, 28, 25, 26, 29, 30, 33, 31, 38, 37, 39, 40, 40, 43, 38, 43, 45, 46, 47, 45, 54, 51, 51, 53, 51, 54, 54, 59, 54, 54, 55, 64, 62, 63, 61, 62, 61, 63, 65, 63, 62, 70, 73, 72, 68, 68, 73, 75, 70, 75, 80, 83, 77, 80, 77, 76, 78, 78, 81, 84, 91, 89, 86, 85, 88, 91, 96, 95, 83, 92, 94, 90, 93, 96, 102, 100, 103, 99, 101, 100, 105, 102, 99, 103, 104, 101, 107, 107, 109, 105, 109, 107, 113, 113, 121, 115, 119, 119, 113, 114, 117, 113, 117, 111, 120, 122, 123, 119, 122, 124, 124, 120, 118, 123, 126, 121, 122, 127, 124, 128, 127, 122, 125, 125, 123, 122, 132, 129, 126, 123, 127, 125, 127, 129, 129, 128, 124, 126, 122, 125, 126, 129, 126, 121, 125, 123, 125, 122, 125, 121, 124, 120, 122, 123, 121, 121, 121, 119, 120, 117, 115, 116, 117, 115, 114, 111, 108, 107, 110, 111, 110, 109, 115, 109, 107, 101, 101, 103, 98, 99, 99, 105, 100, 103, 102, 103, 105, 90, 99, 96, 94, 96, 94, 92, 91, 95, 92, 90, 96, 91, 88, 87, 86, 82, 86, 76, 77, 80, 81, 73, 72, 69, 74, 79, 72, 71, 68, 71, 68, 63, 66, 69, 67, 64, 57, 59, 62, 60, 66, 59, 56, 55, 55, 54, 56, 57, 58, 56, 52, 51, 48, 48, 49, 46, 16, 17, 19, 16, 24, 24, 23, 30, 26, 26, 29, 27, 28, 26, 26, 25, 28, 31, 37, 32, 35, 35, 35, 36, 36, 41, 39, 41, 41, 49, 48, 45, 58, 54, 49, 52, 52, 52, 53, 57, 54, 59, 58, 65, 61, 63, 65, 63, 62, 68, 67, 65, 68, 69, 69, 75, 67, 68, 74, 76, 70, 76, 78, 76, 78, 78, 80, 75, 83, 87, 80, 79, 90, 86, 85, 83, 89, 87, 93, 93, 85, 95, 94, 92, 91, 93, 99, 100, 103, 97, 97, 97, 103, 102, 103, 102, 102, 102, 105, 108, 106, 105, 105, 108, 112, 116, 123, 114, 122, 120, 116, 115, 118, 115, 116, 109, 113, 118, 121, 122, 121, 119, 118, 120, 124, 125, 121, 122, 124, 127, 127, 126, 125, 125, 122, 125, 124, 124, 134, 130, 125, 124, 125, 125, 126, 129, 126, 125, 129, 123, 123, 126, 123, 129, 126, 122, 128, 120, 127, 125, 124, 121, 123, 125, 119, 123, 121, 118, 122, 124, 125, 119, 117, 115, 117, 114, 114, 115, 109, 109, 112, 114, 114, 108, 115, 111, 111, 106, 104, 106, 103, 93, 103, 105, 103, 103, 104, 103, 102, 88, 97, 94, 94, 91, 97, 95, 91, 95, 93, 90, 92, 87, 87, 87, 84, 84, 86, 83, 75, 84, 84, 80, 74, 75, 79, 81, 73, 69, 69, 71, 67, 64, 67, 68, 67, 66, 58, 60, 63, 63, 65, 57, 53, 51, 54, 57, 51, 52, 58, 54, 51, 51, 49, 49, 47, 43, 19, 19, 19, 16, 25, 25, 24, 25, 26, 26, 28, 30, 30, 27, 29, 25, 28, 30, 37, 35, 38, 37, 40, 38, 35, 37, 38, 42, 43, 46, 48, 46, 57, 50, 49, 56, 54, 56, 58, 59, 52, 56, 57, 60, 60, 62, 67, 62, 65, 65, 64, 64, 66, 67, 68, 77, 69, 70, 73, 71, 75, 77, 80, 78, 81, 81, 84, 80, 87, 90, 86, 83, 89, 87, 85, 85, 89, 86, 93, 93, 89, 95, 94, 96, 95, 98, 98, 95, 101, 100, 97, 103, 108, 100, 104, 104, 102, 108, 108, 112, 110, 107, 111, 114, 111, 114, 119, 116, 119, 121, 120, 116, 115, 116, 118, 111, 109, 118, 116, 119, 120, 121, 115, 122, 122, 123, 123, 126, 123, 124, 124, 126, 125, 125, 121, 120, 124, 129, 129, 130, 120, 125, 121, 126, 131, 127, 125, 125, 127, 125, 124, 124, 123, 132, 123, 126, 123, 120, 130, 129, 123, 124, 119, 126, 121, 120, 120, 118, 119, 122, 122, 116, 119, 114, 117, 117, 115, 117, 109, 114, 113, 116, 113, 106, 111, 113, 109, 103, 101, 103, 107, 103, 105, 104, 104, 98, 100, 99, 103, 93, 97, 96, 101, 95, 93, 91, 95, 96, 91, 90, 88, 83, 85, 88, 87, 83, 78, 83, 74, 83, 84, 85, 82, 74, 81, 78, 73, 72, 71, 68, 66, 67, 71, 68, 65, 66, 62, 63, 69, 69, 64, 61, 55, 52, 58, 60, 53, 54, 58, 54, 54, 52, 51, 52, 52, 49, 22, 19, 19, 21, 24, 22, 25, 21, 25, 26, 28, 32, 32, 31, 30, 27, 30, 31, 36, 42, 37, 38, 44, 42, 38, 37, 39, 43, 46, 43, 47, 48, 52, 49, 57, 57, 58, 59, 55, 59, 57, 55, 63, 58, 59, 61, 65, 64, 67, 63, 63, 66, 66, 69, 73, 78, 74, 73, 72, 69, 77, 78, 81, 82, 81, 84, 86, 82, 82, 84, 92, 89, 88, 91, 91, 89, 91, 91, 98, 98, 96, 95, 97, 103, 101, 104, 104, 101, 99, 98, 92, 94, 104, 101, 103, 104, 94, 100, 106, 105, 107, 102, 113, 110, 111, 113, 115, 122, 115, 119, 120, 120, 115, 114, 119, 112, 108, 118, 117, 121, 119, 119, 113, 121, 120, 122, 124, 123, 123, 128, 126, 122, 122, 125, 119, 122, 125, 131, 127, 130, 121, 127, 121, 130, 126, 124, 125, 131, 125, 132, 125, 125, 128, 134, 125, 134, 128, 120, 123, 125, 122, 128, 122, 125, 125, 120, 119, 121, 120, 123, 124, 117, 118, 115, 114, 118, 115, 116, 115, 120, 114, 120, 115, 103, 110, 117, 106, 103, 105, 107, 107, 110, 102, 104, 98, 96, 96, 98, 109, 102, 97, 93, 99, 99, 93, 92, 93, 100, 89, 93, 90, 87, 87, 88, 91, 84, 87, 83, 84, 82, 86, 78, 83, 75, 80, 76, 73, 69, 72, 68, 65, 72, 73, 68, 66, 67, 59, 65, 71, 66, 63, 62, 58, 54, 56, 55, 58, 56, 51, 53, 53, 52, 56, 55, 48, 45, 22, 19, 20, 21, 25, 23, 25, 22, 25, 27, 26, 33, 32, 30, 29, 28, 31, 30, 34, 41, 33, 37, 41, 41, 42, 41, 43, 43, 46, 43, 47, 49, 47, 50, 55, 53, 54, 56, 55, 54, 61, 60, 61, 56, 57, 61, 60, 64, 65, 67, 64, 65, 68, 70, 77, 78, 76, 72, 76, 73, 77, 81, 83, 82, 83, 79, 81, 81, 80, 89, 91, 91, 89, 92, 94, 92, 93, 92, 95, 98, 97, 95, 98, 100, 100, 104, 101, 101, 97, 98, 97, 96, 99, 100, 103, 101, 94, 94, 106, 102, 104, 109, 110, 109, 113, 116, 114, 118, 115, 119, 119, 120, 117, 117, 120, 118, 115, 115, 116, 124, 122, 117, 115, 120, 124, 120, 122, 130, 130, 128, 125, 123, 120, 119, 118, 128, 125, 123, 123, 127, 122, 126, 124, 132, 129, 128, 124, 128, 124, 130, 126, 129, 130, 132, 131, 125, 127, 125, 124, 130, 125, 121, 120, 128, 125, 123, 124, 118, 123, 121, 124, 121, 120, 116, 115, 119, 116, 117, 121, 120, 118, 118, 118, 104, 110, 114, 107, 109, 99, 102, 106, 109, 103, 103, 99, 96, 99, 104, 110, 105, 100, 95, 96, 99, 96, 94, 98, 96, 90, 95, 91, 89, 91, 86, 88, 87, 85, 82, 82, 78, 83, 73, 76, 78, 81, 75, 75, 74, 73, 70, 68, 75, 71, 67, 69, 63, 56, 61, 64, 59, 63, 60, 63, 57, 57, 55, 56, 55, 47, 53, 53, 52, 53, 52, 51, 48, 20, 22, 22, 21, 27, 25, 22, 26, 25, 27, 27, 34, 31, 29, 27, 29, 30, 28, 32, 41, 35, 39, 41, 41, 42, 41, 41, 43, 46, 47, 47, 49, 50, 55, 52, 51, 54, 57, 58, 56, 58, 58, 60, 56, 58, 60, 58, 62, 64, 66, 66, 66, 66, 70, 75, 74, 73, 70, 74, 76, 79, 83, 83, 80, 85, 78, 78, 78, 86, 89, 89, 93, 95, 92, 92, 91, 92, 94, 94, 99, 96, 95, 96, 94, 97, 100, 105, 99, 98, 101, 96, 96, 101, 98, 99, 101, 101, 92, 104, 98, 104, 106, 110, 109, 115, 114, 114, 117, 112, 114, 117, 115, 118, 119, 121, 121, 120, 116, 116, 119, 122, 119, 119, 116, 119, 124, 122, 129, 129, 126, 121, 120, 117, 121, 120, 126, 125, 123, 124, 124, 123, 125, 126, 129, 130, 125, 129, 131, 129, 129, 126, 132, 130, 129, 132, 124, 130, 124, 125, 128, 125, 125, 125, 130, 123, 120, 123, 123, 123, 121, 125, 122, 120, 120, 119, 120, 121, 122, 122, 118, 115, 113, 116, 109, 109, 110, 106, 106, 101, 103, 106, 106, 106, 103, 103, 101, 105, 107, 104, 102, 105, 98, 98, 99, 94, 94, 98, 97, 95, 92, 93, 89, 87, 86, 89, 87, 83, 86, 81, 79, 80, 78, 78, 79, 83, 75, 76, 77, 70, 71, 72, 74, 69, 65, 67, 62, 60, 61, 61, 57, 61, 59, 61, 57, 56, 58, 57, 60, 49, 54, 53, 51, 48, 48, 54, 51, 21, 25, 25, 24, 25, 23, 23, 28, 22, 27, 29, 33, 27, 31, 27, 32, 30, 28, 31, 39, 39, 38, 41, 38, 39, 42, 41, 43, 45, 50, 43, 47, 53, 59, 54, 51, 56, 54, 53, 56, 57, 57, 60, 57, 60, 60, 59, 57, 61, 65, 67, 69, 71, 67, 73, 70, 70, 71, 70, 76, 78, 81, 77, 79, 78, 83, 81, 81, 87, 90, 89, 95, 95, 88, 89, 89, 90, 95, 96, 102, 96, 99, 100, 96, 98, 97, 105, 97, 101, 99, 101, 100, 104, 97, 101, 101, 104, 94, 98, 104, 107, 105, 111, 112, 114, 114, 117, 114, 108, 112, 116, 117, 120, 116, 120, 121, 121, 117, 119, 120, 120, 117, 120, 114, 115, 123, 119, 124, 123, 125, 120, 119, 115, 121, 124, 124, 127, 124, 125, 127, 126, 126, 126, 121, 131, 127, 129, 130, 129, 128, 128, 134, 129, 131, 129, 129, 134, 123, 129, 128, 123, 128, 125, 122, 120, 118, 124, 129, 124, 125, 131, 122, 120, 122, 119, 121, 125, 120, 117, 117, 113, 114, 114, 114, 109, 114, 106, 108, 108, 101, 107, 108, 105, 104, 106, 109, 108, 106, 98, 99, 105, 100, 100, 98, 96, 94, 100, 100, 100, 95, 93, 93, 89, 85, 87, 88, 86, 86, 86, 79, 77, 80, 78, 79, 82, 75, 73, 76, 72, 73, 73, 71, 68, 67, 66, 69, 64, 66, 65, 60, 62, 62, 56, 57, 57, 57, 57, 60, 50, 57, 55, 52, 47, 48, 56, 53, 21, 27, 24, 20, 18, 25, 25, 25, 20, 24, 27, 27, 26, 27, 31, 31, 28, 32, 37, 40, 42, 43, 42, 39, 38, 44, 42, 44, 46, 52, 44, 52, 54, 54, 55, 51, 57, 59, 55, 58, 61, 51, 58, 62, 62, 63, 60, 63, 55, 62, 64, 69, 71, 70, 73, 75, 76, 73, 75, 72, 79, 75, 78, 82, 83, 82, 81, 84, 83, 89, 87, 92, 92, 89, 88, 85, 85, 94, 96, 97, 95, 103, 106, 101, 96, 100, 105, 101, 100, 102, 101, 107, 100, 102, 98, 102, 103, 100, 102, 101, 106, 105, 112, 115, 120, 115, 114, 114, 110, 111, 111, 114, 117, 117, 117, 120, 121, 118, 118, 115, 123, 122, 121, 118, 115, 119, 122, 125, 128, 122, 122, 124, 120, 119, 126, 117, 115, 127, 127, 125, 126, 123, 122, 124, 132, 128, 129, 128, 131, 128, 127, 130, 132, 132, 131, 129, 129, 122, 131, 126, 124, 128, 132, 115, 112, 119, 118, 127, 125, 126, 125, 124, 116, 117, 121, 122, 120, 122, 117, 119, 113, 117, 120, 112, 115, 114, 106, 106, 107, 104, 109, 109, 106, 102, 103, 103, 107, 100, 102, 104, 98, 100, 104, 99, 95, 91, 93, 99, 93, 90, 93, 92, 90, 86, 86, 87, 85, 80, 81, 80, 80, 81, 77, 80, 80, 77, 73, 74, 72, 68, 73, 68, 74, 73, 67, 63, 64, 62, 66, 63, 62, 62, 57, 62, 58, 57, 59, 57, 51, 55, 54, 55, 47, 47, 52, 51, 21, 22, 26, 24, 21, 26, 24, 23, 20, 22, 25, 28, 28, 29, 35, 31, 26, 31, 36, 43, 43, 40, 42, 44, 42, 44, 44, 46, 44, 50, 48, 48, 51, 54, 52, 58, 55, 65, 59, 53, 54, 55, 59, 64, 60, 60, 64, 66, 66, 67, 61, 68, 70, 72, 72, 72, 75, 75, 79, 74, 79, 75, 79, 81, 81, 81, 75, 78, 88, 88, 88, 86, 90, 93, 88, 83, 90, 95, 91, 90, 95, 98, 99, 103, 96, 101, 106, 104, 99, 103, 107, 106, 99, 105, 109, 105, 104, 105, 100, 99, 102, 102, 107, 115, 123, 116, 113, 114, 112, 111, 112, 112, 110, 111, 114, 116, 115, 115, 117, 115, 119, 123, 124, 124, 122, 124, 123, 123, 124, 122, 120, 126, 121, 120, 126, 121, 116, 118, 125, 125, 132, 124, 118, 130, 128, 128, 129, 127, 127, 123, 130, 121, 133, 127, 127, 127, 126, 120, 126, 125, 125, 126, 130, 118, 116, 120, 120, 124, 122, 129, 122, 123, 122, 120, 119, 123, 118, 121, 118, 118, 116, 119, 120, 116, 115, 108, 109, 105, 110, 109, 105, 108, 109, 104, 105, 100, 105, 104, 108, 108, 104, 101, 102, 98, 91, 89, 92, 95, 91, 94, 89, 87, 89, 91, 90, 87, 86, 79, 86, 82, 80, 81, 77, 82, 82, 80, 74, 74, 70, 67, 70, 66, 74, 73, 67, 63, 58, 62, 69, 62, 65, 64, 61, 63, 57, 58, 62, 54, 49, 58, 55, 54, 48, 50, 50, 49, 20, 17, 25, 27, 27, 26, 25, 23, 24, 24, 31, 32, 27, 25, 32, 31, 31, 30, 35, 37, 42, 39, 42, 41, 39, 45, 49, 52, 51, 43, 47, 47, 55, 59, 48, 57, 53, 63, 54, 55, 61, 61, 61, 60, 61, 63, 66, 63, 62, 65, 67, 67, 67, 71, 77, 72, 67, 68, 77, 75, 81, 81, 73, 76, 77, 83, 79, 81, 87, 86, 85, 87, 90, 91, 90, 89, 92, 95, 90, 90, 90, 99, 98, 100, 97, 99, 99, 102, 100, 102, 109, 97, 102, 103, 107, 105, 103, 108, 101, 104, 99, 103, 107, 113, 122, 116, 108, 110, 117, 115, 116, 115, 109, 109, 116, 115, 117, 117, 120, 121, 119, 123, 124, 129, 126, 124, 120, 131, 122, 125, 113, 120, 114, 123, 128, 123, 140, 120, 130, 132, 130, 124, 130, 123, 125, 124, 127, 129, 129, 124, 131, 123, 131, 132, 127, 127, 123, 123, 125, 124, 125, 129, 126, 125, 122, 121, 121, 119, 120, 123, 124, 122, 123, 126, 118, 125, 120, 122, 121, 114, 115, 119, 114, 116, 114, 108, 111, 109, 108, 106, 106, 108, 110, 102, 103, 104, 100, 107, 110, 106, 108, 102, 101, 101, 96, 96, 95, 93, 92, 96, 85, 88, 89, 89, 88, 89, 92, 79, 80, 83, 82, 82, 79, 84, 83, 79, 73, 75, 70, 68, 73, 75, 73, 65, 66, 62, 58, 62, 66, 64, 60, 61, 63, 64, 63, 64, 59, 59, 55, 57, 48, 50, 49, 56, 52, 49, 19, 19, 24, 23, 27, 25, 24, 25, 25, 25, 30, 31, 27, 27, 30, 30, 33, 32, 37, 36, 44, 43, 46, 42, 42, 51, 49, 51, 49, 48, 46, 52, 53, 54, 54, 57, 53, 62, 49, 58, 63, 63, 58, 60, 61, 64, 62, 62, 65, 68, 68, 67, 64, 64, 67, 70, 72, 74, 76, 75, 79, 83, 75, 78, 79, 82, 81, 83, 84, 86, 89, 90, 95, 94, 92, 90, 89, 90, 89, 91, 94, 94, 95, 99, 99, 99, 100, 104, 99, 98, 102, 102, 110, 106, 106, 105, 102, 106, 106, 106, 101, 106, 110, 110, 115, 115, 111, 112, 115, 114, 116, 117, 116, 117, 123, 121, 118, 121, 125, 126, 124, 124, 123, 127, 123, 128, 125, 132, 124, 130, 126, 128, 123, 127, 128, 129, 130, 127, 135, 122, 127, 122, 129, 126, 131, 126, 126, 125, 126, 128, 127, 127, 125, 133, 128, 128, 125, 124, 125, 125, 124, 128, 128, 129, 126, 124, 121, 119, 118, 117, 127, 121, 123, 127, 122, 123, 119, 122, 123, 117, 115, 116, 110, 112, 111, 110, 109, 108, 107, 109, 109, 111, 112, 110, 107, 101, 102, 111, 106, 106, 108, 106, 101, 99, 95, 95, 98, 94, 96, 94, 88, 81, 87, 86, 86, 92, 89, 83, 77, 86, 82, 82, 79, 81, 81, 76, 71, 75, 71, 70, 64, 67, 66, 63, 66, 64, 62, 60, 63, 64, 65, 65, 67, 64, 64, 65, 60, 65, 56, 58, 52, 55, 49, 54, 56, 52, 23, 22, 24, 21, 22, 21, 22, 26, 26, 29, 28, 32, 29, 25, 28, 29, 33, 32, 40, 38, 43, 42, 45, 43, 42, 46, 45, 51, 48, 49, 48, 56, 52, 51, 57, 54, 54, 59, 53, 60, 61, 67, 59, 63, 56, 61, 61, 64, 67, 66, 65, 67, 68, 68, 68, 70, 74, 74, 75, 78, 78, 79, 75, 75, 77, 82, 83, 78, 87, 88, 92, 91, 94, 96, 95, 95, 94, 92, 91, 90, 99, 96, 94, 100, 100, 96, 98, 101, 97, 100, 102, 105, 106, 107, 107, 101, 102, 103, 109, 107, 108, 108, 110, 111, 112, 112, 112, 114, 114, 117, 123, 124, 124, 120, 123, 125, 119, 120, 124, 124, 125, 122, 122, 126, 123, 126, 128, 128, 130, 126, 127, 129, 132, 127, 132, 160, 181, 168, 152, 119, 126, 128, 130, 126, 129, 125, 129, 126, 129, 128, 129, 123, 123, 132, 131, 131, 128, 126, 128, 127, 123, 126, 129, 129, 126, 127, 121, 124, 120, 121, 128, 121, 125, 118, 125, 122, 120, 122, 122, 118, 117, 115, 112, 112, 111, 112, 108, 105, 111, 111, 109, 108, 103, 108, 112, 107, 105, 105, 102, 105, 101, 105, 97, 97, 97, 98, 99, 92, 95, 93, 91, 84, 88, 88, 86, 85, 88, 82, 81, 88, 86, 81, 78, 79, 83, 78, 74, 73, 72, 72, 68, 67, 69, 70, 66, 70, 65, 58, 63, 65, 66, 67, 66, 65, 63, 66, 60, 59, 54, 57, 52, 55, 49, 52, 54, 51, 24, 24, 25, 23, 21, 20, 22, 26, 27, 30, 27, 31, 30, 25, 27, 28, 31, 34, 41, 40, 43, 44, 44, 42, 41, 41, 43, 51, 51, 47, 51, 55, 53, 55, 57, 52, 58, 59, 54, 59, 63, 66, 59, 64, 56, 64, 65, 64, 63, 68, 69, 71, 69, 67, 70, 72, 80, 78, 72, 77, 82, 76, 75, 74, 78, 81, 82, 81, 85, 91, 88, 93, 96, 95, 98, 98, 94, 96, 93, 91, 93, 100, 93, 98, 103, 99, 97, 98, 98, 101, 98, 100, 102, 106, 105, 103, 102, 103, 109, 108, 111, 107, 108, 115, 112, 114, 114, 114, 117, 118, 120, 119, 121, 120, 123, 122, 123, 121, 117, 122, 124, 122, 124, 127, 128, 125, 128, 130, 128, 123, 128, 127, 129, 117, 72, 94, 94, 96, 83, 87, 124, 128, 133, 119, 128, 123, 128, 129, 131, 128, 133, 124, 130, 136, 134, 130, 127, 128, 132, 126, 124, 129, 128, 122, 124, 127, 124, 125, 128, 124, 129, 123, 120, 114, 124, 122, 120, 123, 121, 114, 115, 118, 114, 115, 115, 116, 109, 108, 111, 104, 113, 100, 74, 105, 105, 110, 103, 99, 102, 104, 102, 103, 97, 96, 96, 97, 94, 91, 90, 92, 89, 90, 87, 87, 86, 85, 90, 86, 85, 85, 84, 82, 80, 80, 86, 80, 77, 72, 74, 75, 70, 71, 74, 73, 69, 71, 66, 59, 63, 68, 68, 69, 64, 66, 62, 68, 64, 60, 57, 57, 56, 54, 51, 54, 51, 50, 20, 24, 25, 26, 29, 21, 22, 24, 28, 27, 30, 31, 27, 27, 24, 27, 29, 35, 38, 43, 42, 44, 42, 43, 43, 42, 45, 48, 55, 46, 51, 52, 55, 58, 58, 54, 56, 57, 58, 59, 63, 61, 60, 65, 61, 63, 65, 65, 63, 66, 66, 73, 76, 71, 72, 69, 79, 77, 71, 77, 83, 75, 77, 78, 84, 80, 85, 83, 85, 90, 89, 88, 95, 98, 97, 96, 96, 100, 91, 98, 93, 92, 97, 104, 100, 97, 99, 97, 99, 103, 102, 100, 103, 104, 106, 109, 104, 109, 108, 106, 105, 106, 107, 116, 112, 112, 115, 119, 116, 117, 114, 114, 116, 112, 116, 119, 120, 124, 119, 115, 119, 121, 126, 127, 132, 132, 135, 130, 125, 125, 126, 121, 120, 92, 33, 20, 33, 25, 18, 35, 108, 129, 131, 122, 126, 125, 129, 131, 128, 132, 127, 126, 130, 130, 125, 125, 120, 125, 126, 128, 127, 126, 128, 117, 126, 126, 130, 122, 132, 124, 125, 122, 118, 119, 121, 121, 119, 123, 123, 117, 115, 119, 121, 116, 115, 116, 109, 109, 110, 110, 110, 102, 93, 108, 103, 112, 110, 95, 103, 102, 105, 102, 101, 95, 94, 96, 92, 98, 90, 91, 88, 89, 87, 85, 85, 90, 90, 90, 75, 83, 82, 81, 80, 78, 85, 77, 78, 71, 75, 74, 69, 70, 71, 73, 73, 73, 65, 66, 67, 64, 65, 67, 60, 66, 61, 68, 65, 57, 56, 57, 61, 51, 51, 53, 51, 52, 18, 20, 25, 21, 16, 22, 26, 22, 24, 26, 35, 31, 26, 24, 21, 25, 31, 40, 43, 41, 42, 41, 43, 39, 44, 45, 44, 47, 49, 47, 46, 52, 55, 58, 54, 55, 57, 60, 57, 58, 58, 69, 60, 70, 63, 63, 66, 64, 65, 67, 67, 71, 66, 64, 75, 70, 79, 78, 73, 76, 82, 79, 81, 84, 81, 74, 78, 86, 91, 91, 94, 84, 89, 93, 98, 90, 97, 98, 93, 99, 99, 99, 98, 106, 98, 99, 98, 102, 99, 106, 104, 107, 104, 104, 105, 102, 103, 105, 109, 104, 104, 106, 109, 107, 106, 107, 110, 107, 115, 117, 120, 115, 107, 115, 118, 113, 121, 116, 121, 123, 120, 124, 115, 122, 123, 128, 130, 131, 125, 125, 128, 127, 124, 68, 68, 108, 145, 132, 72, 40, 82, 136, 120, 139, 130, 126, 131, 139, 129, 130, 125, 122, 136, 128, 127, 133, 127, 126, 131, 128, 122, 127, 129, 123, 127, 124, 126, 125, 125, 125, 120, 120, 119, 116, 120, 124, 126, 120, 122, 118, 121, 116, 123, 117, 117, 114, 114, 110, 110, 114, 110, 105, 109, 106, 96, 106, 102, 97, 103, 105, 101, 101, 97, 100, 99, 101, 99, 96, 92, 88, 92, 86, 85, 88, 93, 89, 90, 87, 78, 82, 82, 82, 81, 80, 77, 77, 77, 76, 71, 72, 74, 70, 75, 71, 74, 68, 70, 67, 69, 67, 71, 68, 61, 65, 59, 67, 61, 65, 51, 59, 60, 54, 48, 50, 47, 50, 21, 23, 26, 22, 21, 21, 25, 24, 25, 27, 31, 29, 25, 26, 23, 26, 31, 33, 42, 41, 40, 39, 42, 44, 42, 44, 44, 46, 54, 48, 43, 53, 52, 59, 57, 51, 56, 57, 54, 59, 60, 64, 61, 69, 68, 65, 65, 68, 68, 72, 70, 71, 68, 67, 70, 70, 79, 78, 74, 77, 81, 79, 80, 83, 82, 78, 80, 84, 91, 87, 90, 86, 92, 91, 95, 92, 94, 94, 95, 95, 100, 102, 106, 108, 105, 105, 99, 101, 101, 103, 105, 109, 107, 105, 104, 103, 103, 102, 102, 107, 104, 106, 108, 107, 111, 112, 108, 105, 117, 119, 118, 114, 110, 115, 120, 118, 118, 116, 123, 119, 119, 117, 116, 120, 123, 125, 131, 129, 125, 125, 127, 132, 125, 48, 70, 21, 3, 7, 4, 12, 64, 128, 122, 132, 132, 125, 128, 134, 132, 129, 127, 126, 132, 132, 131, 133, 128, 126, 126, 124, 124, 126, 128, 129, 127, 124, 116, 125, 125, 125, 120, 117, 127, 120, 122, 121, 129, 127, 122, 120, 122, 115, 116, 113, 111, 113, 115, 107, 112, 112, 115, 107, 112, 108, 104, 103, 99, 100, 104, 100, 100, 97, 96, 99, 95, 99, 100, 97, 94, 93, 92, 86, 83, 86, 91, 88, 89, 90, 79, 84, 85, 84, 79, 80, 85, 81, 79, 77, 69, 73, 72, 72, 75, 73, 67, 65, 63, 67, 71, 71, 69, 73, 63, 61, 62, 57, 54, 58, 54, 57, 55, 55, 53, 53, 53, 51, 19, 22, 29, 26, 25, 22, 27, 28, 26, 27, 28, 29, 27, 22, 25, 28, 32, 33, 39, 43, 39, 40, 41, 44, 44, 43, 43, 45, 51, 50, 50, 53, 53, 54, 60, 54, 55, 58, 58, 62, 64, 63, 60, 64, 67, 69, 68, 65, 70, 75, 72, 71, 71, 75, 74, 75, 76, 77, 74, 77, 78, 80, 85, 84, 81, 81, 84, 87, 89, 86, 90, 86, 89, 90, 95, 98, 94, 94, 96, 93, 99, 101, 104, 104, 105, 107, 105, 102, 100, 103, 109, 102, 105, 105, 107, 104, 102, 104, 103, 104, 107, 104, 109, 110, 115, 115, 113, 111, 115, 121, 113, 115, 109, 119, 123, 121, 118, 118, 126, 123, 122, 118, 124, 124, 127, 123, 128, 130, 127, 129, 126, 129, 121, 30, 74, 20, 2, 2, 9, 21, 41, 126, 125, 122, 129, 124, 128, 130, 131, 128, 126, 127, 133, 132, 132, 128, 124, 124, 124, 126, 131, 128, 123, 128, 128, 128, 120, 125, 125, 121, 126, 121, 124, 118, 121, 121, 124, 118, 117, 123, 120, 117, 117, 116, 115, 111, 112, 111, 115, 111, 113, 107, 112, 110, 107, 101, 102, 102, 104, 98, 105, 99, 97, 97, 94, 96, 96, 95, 94, 92, 93, 86, 85, 87, 89, 93, 87, 87, 80, 81, 82, 82, 82, 85, 81, 84, 78, 77, 74, 71, 70, 71, 69, 74, 68, 65, 66, 71, 69, 69, 70, 69, 60, 59, 67, 58, 60, 59, 59, 51, 51, 56, 56, 52, 59, 56, 15, 19, 30, 27, 26, 24, 26, 27, 27, 26, 28, 28, 28, 27, 27, 28, 32, 36, 38, 43, 38, 43, 43, 44, 48, 45, 46, 48, 49, 51, 52, 47, 52, 52, 59, 52, 53, 55, 58, 61, 66, 67, 60, 65, 67, 68, 69, 69, 69, 70, 72, 73, 70, 75, 78, 78, 79, 78, 77, 77, 77, 82, 83, 84, 85, 84, 84, 87, 84, 84, 88, 85, 89, 95, 96, 99, 93, 100, 97, 99, 100, 104, 103, 106, 108, 111, 108, 102, 102, 104, 108, 108, 108, 106, 110, 108, 103, 102, 107, 103, 109, 106, 108, 110, 115, 113, 113, 111, 111, 115, 113, 113, 112, 119, 120, 123, 119, 120, 120, 121, 124, 120, 125, 122, 124, 124, 128, 129, 127, 129, 123, 127, 114, 14, 73, 15, 5, 4, 5, 27, 11, 120, 126, 123, 126, 123, 128, 131, 128, 129, 128, 130, 132, 128, 128, 130, 127, 123, 125, 129, 131, 127, 121, 125, 127, 124, 121, 117, 128, 121, 124, 125, 122, 120, 123, 119, 122, 117, 115, 120, 120, 115, 108, 113, 118, 111, 115, 109, 110, 110, 112, 113, 112, 109, 104, 100, 106, 106, 104, 100, 106, 100, 95, 96, 97, 97, 98, 100, 93, 89, 90, 88, 85, 88, 89, 94, 90, 85, 87, 82, 82, 80, 82, 82, 81, 80, 75, 77, 75, 70, 76, 76, 73, 75, 70, 66, 66, 66, 68, 71, 68, 65, 60, 61, 64, 58, 59, 58, 58, 50, 51, 54, 55, 53, 55, 55, 16, 18, 27, 25, 23, 24, 24, 24, 27, 29, 33, 31, 29, 31, 28, 31, 34, 41, 44, 45, 39, 44, 45, 45, 49, 50, 47, 51, 53, 51, 49, 48, 49, 52, 56, 49, 57, 57, 58, 61, 66, 64, 60, 64, 68, 66, 66, 72, 72, 69, 71, 75, 69, 75, 74, 76, 80, 79, 80, 77, 76, 82, 80, 82, 88, 86, 85, 88, 85, 85, 87, 90, 87, 95, 94, 97, 94, 98, 94, 102, 97, 101, 98, 103, 104, 106, 107, 105, 107, 104, 109, 110, 108, 106, 108, 108, 103, 103, 109, 109, 106, 108, 108, 111, 114, 111, 111, 111, 114, 113, 116, 114, 117, 120, 119, 120, 118, 122, 122, 121, 122, 119, 121, 122, 125, 125, 129, 128, 126, 132, 125, 120, 106, 11, 76, 15, 4, 2, 1, 27, 4, 110, 125, 123, 127, 124, 129, 132, 123, 127, 126, 129, 127, 126, 126, 128, 126, 127, 128, 130, 129, 125, 119, 127, 131, 126, 121, 121, 124, 125, 125, 127, 122, 125, 124, 120, 123, 118, 117, 118, 118, 117, 111, 116, 115, 112, 118, 111, 111, 109, 111, 112, 111, 106, 104, 105, 104, 104, 102, 99, 100, 97, 94, 96, 96, 96, 99, 101, 97, 96, 94, 93, 83, 86, 90, 92, 93, 89, 90, 82, 87, 83, 84, 83, 88, 79, 74, 75, 75, 71, 80, 79, 78, 77, 73, 67, 66, 67, 71, 68, 66, 65, 60, 61, 62, 61, 58, 65, 60, 51, 53, 54, 53, 51, 50, 54, 20, 22, 23, 22, 20, 22, 22, 25, 25, 29, 31, 34, 32, 33, 29, 31, 34, 42, 46, 48, 44, 46, 45, 44, 48, 51, 47, 50, 55, 51, 52, 56, 50, 51, 54, 52, 54, 53, 58, 61, 63, 58, 61, 63, 66, 65, 63, 69, 69, 72, 70, 75, 71, 74, 70, 75, 82, 84, 82, 80, 79, 82, 83, 83, 84, 84, 90, 88, 85, 86, 85, 89, 91, 93, 91, 93, 90, 93, 96, 99, 99, 101, 100, 103, 107, 102, 107, 104, 107, 103, 110, 113, 111, 112, 106, 106, 101, 112, 111, 113, 106, 110, 110, 114, 112, 112, 112, 117, 115, 114, 118, 121, 117, 124, 123, 120, 122, 120, 121, 117, 123, 120, 122, 127, 131, 126, 127, 131, 125, 131, 118, 115, 97, 13, 10, 80, 13, 10, 13, 10, 1, 5, 31, 5, 94, 124, 122, 129, 126, 128, 131, 124, 130, 130, 132, 130, 127, 125, 133, 128, 129, 128, 125, 130, 129, 126, 125, 130, 130, 125, 129, 128, 122, 124, 122, 120, 124, 123, 126, 123, 120, 119, 115, 120, 114, 116, 116, 112, 116, 118, 112, 110, 110, 111, 114, 112, 104, 108, 109, 101, 99, 103, 101, 103, 98, 96, 97, 95, 95, 102, 103, 101, 98, 94, 93, 88, 85, 95, 93, 91, 88, 85, 81, 85, 82, 86, 84, 84, 80, 75, 71, 77, 71, 74, 74, 73, 75, 75, 69, 65, 64, 67, 65, 67, 65, 57, 61, 64, 64, 60, 67, 62, 49, 54, 55, 53, 45, 49, 54, 23, 26, 23, 20, 17, 21, 23, 29, 21, 28, 29, 33, 28, 29, 32, 30, 34, 43, 44, 47, 46, 47, 46, 45, 48, 48, 48, 51, 56, 49, 51, 54, 54, 52, 51, 58, 56, 55, 57, 56, 60, 55, 61, 70, 64, 62, 64, 67, 64, 73, 67, 75, 74, 77, 77, 78, 80, 87, 82, 82, 85, 84, 85, 84, 84, 86, 91, 92, 87, 93, 89, 87, 93, 91, 94, 96, 91, 88, 95, 89, 100, 101, 107, 103, 111, 98, 107, 102, 109, 110, 110, 112, 111, 110, 106, 115, 105, 110, 110, 119, 112, 117, 110, 113, 115, 121, 117, 128, 120, 121, 120, 121, 116, 120, 122, 121, 129, 117, 122, 124, 130, 127, 126, 123, 127, 132, 131, 131, 118, 130, 114, 119, 90, 18, 65, 7, 8, 9, 32, 11, 83, 122, 123, 127, 127, 129, 133, 133, 133, 135, 134, 126, 128, 122, 126, 123, 127, 137, 126, 128, 126, 130, 130, 129, 126, 127, 131, 123, 120, 130, 119, 122, 126, 124, 127, 122, 119, 117, 118, 120, 114, 121, 116, 120, 124, 118, 114, 108, 114, 111, 116, 113, 102, 106, 104, 98, 90, 104, 101, 104, 98, 95, 95, 99, 98, 103, 105, 101, 96, 96, 88, 96, 87, 95, 95, 89, 86, 83, 86, 83, 85, 85, 82, 86, 78, 79, 73, 76, 72, 67, 70, 70, 71, 65, 61, 69, 70, 68, 72, 69, 64, 59, 61, 65, 66, 58, 60, 67, 54, 56, 53, 51, 45, 47, 52, 25, 27, 24, 23, 23, 25, 27, 28, 25, 30, 29, 32, 26, 29, 33, 36, 39, 39, 48, 44, 49, 40, 44, 48, 47, 47, 49, 48, 50, 49, 52, 54, 53, 54, 55, 60, 56, 53, 55, 60, 62, 61, 65, 66, 64, 70, 70, 67, 64, 74, 75, 73, 73, 74, 78, 81, 83, 80, 79, 83, 81, 78, 81, 80, 81, 86, 87, 89, 89, 91, 89, 86, 93, 89, 92, 98, 97, 94, 94, 94, 101, 100, 99, 105, 103, 101, 107, 100, 99, 103, 99, 109, 110, 109, 109, 112, 104, 109, 111, 115, 116, 116, 111, 115, 115, 111, 121, 117, 121, 123, 118, 120, 117, 115, 116, 124, 127, 126, 123, 123, 122, 121, 132, 125, 129, 126, 124, 126, 125, 128, 124, 129, 92, 13, 10, 57, 9, 7, 9, 6, 31, 9, 91, 129, 131, 134, 127, 133, 126, 130, 131, 126, 133, 134, 130, 127, 123, 125, 126, 128, 125, 131, 123, 129, 131, 130, 124, 126, 121, 125, 127, 129, 126, 124, 121, 123, 119, 122, 120, 120, 122, 125, 116, 121, 124, 124, 120, 119, 117, 110, 112, 111, 119, 109, 110, 109, 113, 103, 90, 99, 105, 104, 94, 98, 94, 94, 96, 98, 96, 96, 97, 98, 93, 89, 92, 93, 90, 91, 86, 87, 90, 90, 82, 87, 82, 81, 79, 76, 70, 72, 69, 73, 74, 75, 71, 69, 70, 63, 67, 67, 72, 69, 66, 66, 66, 66, 65, 67, 63, 65, 59, 54, 50, 55, 56, 51, 54, 23, 24, 22, 24, 23, 27, 24, 27, 29, 30, 31, 30, 33, 30, 36, 36, 37, 42, 44, 46, 49, 45, 45, 47, 47, 53, 52, 52, 51, 53, 53, 57, 58, 57, 60, 58, 59, 52, 57, 58, 54, 61, 65, 65, 67, 71, 67, 68, 66, 72, 74, 74, 74, 74, 77, 83, 82, 78, 85, 83, 79, 81, 78, 77, 83, 81, 85, 91, 90, 89, 90, 94, 95, 87, 91, 101, 98, 97, 96, 100, 106, 106, 99, 102, 103, 104, 99, 106, 101, 105, 101, 112, 109, 108, 110, 111, 114, 109, 115, 115, 110, 112, 113, 113, 116, 117, 119, 117, 120, 120, 116, 120, 121, 121, 122, 119, 124, 127, 126, 123, 124, 122, 129, 127, 127, 130, 130, 132, 127, 124, 124, 136, 117, 16, 39, 3, 4, 7, 8, 23, 25, 128, 158, 136, 131, 129, 127, 129, 127, 137, 128, 128, 136, 132, 126, 126, 130, 127, 127, 126, 128, 125, 126, 127, 125, 125, 130, 122, 129, 131, 128, 122, 121, 127, 122, 119, 119, 120, 121, 121, 127, 119, 112, 123, 119, 119, 119, 114, 108, 108, 108, 111, 106, 110, 106, 105, 99, 88, 97, 102, 102, 94, 101, 99, 98, 98, 101, 96, 96, 101, 90, 91, 86, 92, 95, 88, 95, 85, 88, 91, 89, 91, 87, 82, 84, 77, 73, 71, 74, 71, 76, 79, 79, 74, 67, 66, 64, 66, 70, 67, 66, 68, 65, 64, 60, 63, 60, 65, 61, 58, 54, 58, 54, 57, 52, 57, 24, 24, 21, 23, 21, 24, 25, 26, 29, 30, 28, 31, 33, 34, 37, 35, 34, 44, 44, 47, 49, 48, 47, 49, 51, 53, 54, 52, 53, 56, 57, 60, 59, 57, 62, 58, 59, 55, 58, 60, 57, 58, 61, 70, 69, 71, 67, 68, 71, 74, 76, 75, 71, 76, 75, 81, 79, 80, 83, 80, 83, 84, 84, 84, 84, 82, 86, 88, 93, 94, 92, 94, 95, 89, 97, 101, 103, 101, 102, 101, 101, 106, 102, 106, 103, 105, 104, 102, 102, 102, 106, 107, 107, 107, 110, 114, 116, 112, 117, 117, 114, 111, 112, 110, 117, 120, 113, 116, 119, 117, 115, 115, 119, 122, 123, 120, 127, 126, 130, 123, 122, 126, 126, 128, 131, 132, 130, 133, 129, 123, 129, 142, 152, 63, 58, 22, 20, 8, 28, 68, 89, 142, 169, 146, 131, 130, 132, 129, 129, 138, 130, 129, 132, 131, 126, 125, 126, 126, 128, 126, 127, 129, 128, 127, 131, 131, 126, 123, 130, 127, 125, 122, 117, 125, 121, 119, 117, 120, 121, 122, 124, 118, 113, 117, 118, 116, 117, 114, 114, 109, 106, 107, 103, 104, 103, 102, 96, 86, 100, 100, 100, 97, 102, 100, 99, 99, 101, 98, 99, 101, 90, 88, 88, 90, 93, 88, 91, 83, 85, 87, 89, 92, 85, 81, 82, 79, 75, 72, 70, 71, 72, 78, 77, 73, 68, 69, 68, 67, 69, 70, 68, 66, 60, 62, 58, 61, 58, 62, 61, 57, 54, 59, 52, 55, 50, 56, 27, 24, 23, 22, 22, 23, 28, 29, 27, 29, 26, 30, 29, 35, 37, 39, 37, 45, 46, 46, 48, 47, 46, 50, 52, 48, 55, 51, 57, 57, 60, 61, 60, 58, 60, 60, 61, 63, 67, 59, 56, 54, 60, 69, 67, 68, 67, 68, 70, 72, 72, 75, 73, 75, 76, 79, 74, 84, 84, 79, 88, 83, 85, 89, 89, 87, 86, 91, 94, 92, 89, 88, 98, 92, 100, 95, 97, 102, 102, 102, 103, 107, 107, 108, 101, 108, 109, 102, 105, 103, 108, 107, 110, 112, 111, 113, 115, 116, 118, 118, 117, 112, 112, 112, 120, 119, 118, 115, 116, 121, 120, 120, 122, 123, 123, 123, 125, 127, 126, 124, 123, 130, 128, 128, 133, 132, 130, 133, 129, 125, 137, 143, 153, 171, 182, 161, 152, 141, 163, 183, 179, 117, 102, 126, 130, 127, 134, 129, 132, 134, 132, 129, 128, 129, 126, 125, 121, 123, 129, 127, 129, 128, 125, 126, 128, 130, 120, 123, 132, 129, 120, 117, 119, 121, 120, 120, 121, 119, 118, 120, 122, 120, 115, 114, 117, 118, 114, 117, 118, 110, 108, 112, 107, 103, 103, 98, 94, 90, 104, 100, 100, 101, 104, 99, 97, 98, 97, 101, 101, 99, 92, 87, 94, 93, 93, 93, 88, 84, 84, 82, 85, 88, 84, 80, 79, 77, 76, 77, 71, 74, 77, 81, 81, 76, 74, 69, 72, 70, 68, 69, 68, 67, 59, 56, 61, 60, 58, 60, 63, 58, 56, 52, 51, 55, 54, 56, 24, 19, 25, 22, 26, 23, 26, 33, 29, 29, 33, 28, 30, 32, 36, 41, 42, 44, 45, 40, 43, 45, 45, 54, 52, 49, 55, 54, 54, 52, 54, 57, 58, 57, 57, 60, 64, 68, 69, 61, 64, 58, 63, 66, 70, 68, 67, 66, 72, 72, 70, 73, 73, 75, 79, 76, 73, 84, 85, 81, 88, 86, 82, 86, 92, 87, 89, 92, 91, 91, 92, 94, 101, 95, 97, 96, 88, 95, 96, 96, 101, 104, 104, 105, 106, 109, 105, 104, 109, 106, 110, 107, 110, 116, 116, 113, 111, 114, 119, 119, 116, 115, 117, 115, 119, 122, 125, 114, 117, 124, 124, 123, 122, 120, 120, 126, 123, 123, 122, 129, 123, 126, 128, 128, 132, 135, 130, 133, 127, 127, 127, 120, 120, 126, 163, 194, 192, 185, 169, 144, 100, 88, 99, 127, 133, 130, 127, 133, 133, 135, 129, 131, 135, 131, 128, 125, 123, 125, 126, 129, 130, 130, 127, 121, 126, 131, 118, 125, 130, 127, 121, 121, 125, 122, 120, 120, 129, 126, 119, 118, 123, 121, 116, 114, 121, 118, 116, 121, 121, 117, 114, 115, 106, 107, 107, 104, 105, 99, 104, 105, 104, 101, 101, 100, 98, 101, 99, 100, 101, 97, 93, 93, 98, 98, 92, 90, 88, 89, 94, 88, 85, 86, 86, 85, 81, 77, 78, 77, 74, 76, 76, 74, 78, 77, 70, 66, 68, 67, 71, 65, 70, 64, 62, 54, 58, 60, 61, 57, 59, 56, 56, 49, 52, 51, 58, 55, 22, 19, 26, 22, 26, 21, 25, 35, 30, 30, 32, 28, 31, 33, 37, 39, 41, 41, 45, 43, 42, 44, 42, 51, 52, 53, 54, 56, 52, 52, 53, 56, 58, 59, 57, 59, 65, 63, 68, 62, 65, 57, 65, 65, 69, 65, 69, 69, 70, 71, 72, 74, 77, 80, 79, 76, 77, 83, 83, 85, 87, 94, 86, 85, 90, 88, 92, 89, 88, 93, 92, 91, 104, 96, 95, 99, 93, 98, 103, 100, 102, 108, 108, 107, 110, 107, 102, 102, 109, 106, 110, 112, 113, 113, 112, 112, 108, 111, 118, 119, 114, 116, 119, 115, 115, 120, 122, 115, 118, 124, 120, 118, 120, 117, 120, 122, 129, 125, 131, 128, 127, 126, 128, 132, 133, 130, 128, 133, 132, 131, 131, 131, 85, 118, 112, 107, 122, 108, 109, 91, 84, 96, 145, 144, 129, 129, 120, 126, 125, 134, 130, 129, 140, 130, 129, 134, 132, 127, 125, 129, 126, 127, 122, 126, 131, 132, 124, 126, 130, 123, 121, 121, 122, 123, 122, 126, 131, 126, 118, 118, 130, 124, 123, 114, 122, 121, 119, 120, 114, 107, 109, 115, 111, 115, 109, 107, 109, 102, 102, 110, 107, 108, 106, 108, 101, 103, 102, 99, 101, 96, 94, 93, 93, 100, 94, 93, 96, 87, 84, 87, 87, 88, 89, 86, 85, 79, 76, 74, 73, 77, 72, 71, 75, 78, 69, 69, 66, 66, 72, 69, 70, 61, 64, 61, 58, 60, 62, 55, 55, 57, 58, 59, 57, 52, 53, 49, 27, 24, 26, 23, 24, 21, 28, 31, 27, 29, 25, 29, 30, 38, 39, 38, 38, 41, 45, 43, 39, 42, 43, 50, 50, 51, 54, 55, 54, 52, 56, 55, 56, 59, 60, 62, 65, 58, 71, 61, 63, 65, 67, 65, 65, 63, 73, 73, 73, 69, 70, 72, 75, 77, 80, 78, 80, 79, 80, 84, 83, 90, 87, 88, 88, 92, 90, 86, 86, 94, 94, 94, 102, 97, 93, 93, 95, 94, 101, 104, 103, 103, 104, 101, 106, 108, 105, 109, 111, 111, 107, 108, 115, 112, 111, 119, 112, 115, 118, 115, 111, 114, 113, 114, 117, 115, 122, 116, 115, 124, 118, 118, 122, 120, 126, 123, 122, 122, 125, 126, 129, 127, 126, 130, 132, 129, 131, 133, 130, 129, 129, 146, 164, 124, 139, 128, 126, 134, 132, 121, 140, 175, 137, 141, 128, 133, 132, 127, 130, 128, 128, 130, 136, 125, 128, 131, 132, 129, 124, 127, 124, 129, 129, 132, 125, 125, 127, 124, 126, 122, 119, 120, 124, 124, 125, 130, 127, 125, 122, 123, 129, 119, 122, 114, 114, 123, 118, 111, 111, 107, 106, 111, 117, 116, 108, 105, 107, 103, 103, 111, 108, 105, 103, 109, 103, 103, 102, 99, 102, 97, 95, 96, 94, 97, 94, 93, 92, 89, 89, 93, 91, 86, 92, 86, 85, 80, 78, 80, 74, 73, 70, 75, 77, 74, 71, 70, 67, 69, 67, 67, 65, 64, 59, 62, 62, 60, 57, 60, 57, 60, 58, 59, 55, 56, 57, 53, 28, 27, 25, 25, 30, 21, 24, 22, 23, 27, 27, 31, 34, 35, 36, 40, 38, 40, 42, 43, 42, 43, 45, 47, 48, 50, 50, 55, 54, 52, 54, 59, 55, 58, 59, 63, 64, 66, 70, 61, 60, 64, 68, 66, 61, 64, 66, 74, 72, 69, 76, 69, 69, 72, 80, 80, 82, 77, 85, 84, 86, 90, 92, 90, 85, 89, 90, 93, 93, 96, 95, 92, 96, 93, 97, 92, 97, 90, 99, 102, 104, 105, 105, 104, 108, 111, 105, 116, 112, 110, 111, 102, 115, 114, 112, 113, 114, 120, 122, 118, 118, 120, 114, 112, 125, 124, 123, 121, 122, 118, 117, 116, 119, 120, 125, 128, 129, 129, 123, 121, 128, 124, 126, 129, 132, 128, 133, 130, 135, 126, 134, 172, 122, 147, 155, 150, 148, 154, 148, 138, 137, 136, 178, 147, 134, 134, 135, 131, 131, 127, 132, 132, 133, 131, 127, 127, 131, 127, 127, 129, 132, 129, 129, 129, 126, 129, 126, 126, 127, 123, 120, 125, 122, 125, 124, 127, 122, 121, 125, 128, 125, 119, 119, 117, 113, 116, 119, 112, 112, 114, 108, 103, 120, 117, 110, 104, 108, 107, 106, 106, 112, 100, 105, 105, 107, 105, 100, 96, 98, 104, 99, 94, 92, 95, 95, 94, 92, 86, 89, 91, 89, 84, 87, 86, 83, 79, 76, 78, 73, 78, 69, 78, 79, 67, 73, 72, 67, 69, 67, 64, 71, 64, 57, 58, 66, 63, 61, 60, 61, 62, 60, 58, 61, 59, 60, 57, 30, 29, 26, 26, 33, 24, 23, 24, 25, 25, 28, 34, 35, 34, 38, 38, 38, 40, 43, 46, 45, 46, 44, 50, 48, 51, 52, 57, 56, 54, 53, 59, 58, 60, 60, 63, 65, 65, 72, 63, 61, 62, 67, 70, 63, 59, 68, 73, 74, 72, 74, 71, 70, 72, 81, 81, 82, 76, 84, 82, 87, 90, 92, 92, 87, 86, 90, 90, 93, 96, 98, 96, 96, 98, 99, 95, 98, 94, 100, 104, 106, 110, 106, 107, 107, 108, 108, 115, 112, 110, 112, 104, 110, 112, 115, 110, 115, 120, 122, 121, 120, 122, 117, 115, 124, 124, 118, 122, 120, 119, 119, 117, 116, 122, 124, 125, 132, 129, 128, 124, 126, 126, 123, 128, 133, 132, 132, 130, 133, 128, 151, 213, 134, 125, 134, 154, 155, 158, 142, 118, 102, 113, 176, 161, 131, 129, 135, 133, 133, 134, 133, 132, 134, 136, 122, 126, 125, 127, 123, 128, 128, 130, 130, 129, 127, 130, 126, 126, 127, 126, 127, 123, 123, 125, 124, 123, 122, 121, 127, 121, 123, 122, 118, 119, 118, 117, 122, 116, 116, 113, 112, 106, 115, 112, 112, 106, 109, 108, 103, 105, 111, 105, 107, 103, 104, 103, 100, 97, 97, 102, 99, 97, 94, 96, 97, 94, 94, 85, 91, 88, 85, 84, 89, 90, 84, 83, 78, 78, 75, 77, 68, 78, 78, 71, 76, 75, 65, 73, 67, 68, 71, 64, 59, 58, 64, 64, 62, 63, 65, 62, 58, 60, 65, 58, 58, 57, 33, 31, 30, 29, 30, 29, 25, 23, 23, 23, 26, 34, 33, 33, 37, 35, 42, 42, 45, 46, 48, 50, 47, 52, 49, 51, 53, 58, 59, 57, 56, 56, 57, 62, 58, 60, 67, 67, 73, 64, 60, 65, 70, 68, 69, 62, 66, 68, 75, 72, 68, 71, 70, 73, 82, 79, 82, 79, 85, 83, 86, 87, 91, 89, 88, 84, 88, 93, 93, 94, 99, 96, 101, 103, 105, 100, 99, 100, 100, 106, 106, 102, 102, 105, 105, 105, 110, 110, 111, 112, 109, 109, 114, 111, 117, 111, 116, 123, 122, 121, 119, 120, 114, 119, 124, 122, 116, 122, 118, 122, 121, 122, 117, 121, 124, 127, 125, 127, 129, 131, 129, 131, 127, 131, 132, 135, 129, 126, 129, 132, 146, 176, 179, 160, 134, 139, 136, 129, 119, 107, 114, 101, 108, 136, 131, 133, 133, 130, 133, 132, 129, 128, 130, 129, 122, 128, 126, 130, 126, 127, 127, 128, 131, 131, 130, 126, 128, 127, 128, 130, 129, 125, 126, 124, 126, 122, 122, 118, 128, 121, 120, 122, 123, 119, 119, 119, 120, 118, 116, 119, 115, 109, 110, 111, 111, 107, 111, 109, 102, 103, 106, 111, 108, 105, 103, 102, 102, 99, 97, 98, 94, 96, 92, 96, 99, 94, 94, 87, 90, 87, 86, 86, 85, 93, 88, 83, 81, 81, 75, 77, 71, 78, 79, 75, 76, 70, 66, 73, 72, 68, 66, 62, 59, 61, 58, 62, 64, 64, 66, 60, 59, 62, 65, 58, 55, 56, 33, 32, 33, 30, 26, 33, 30, 20, 22, 25, 26, 33, 32, 33, 39, 36, 42, 41, 46, 49, 51, 51, 51, 52, 46, 52, 54, 56, 57, 56, 51, 59, 61, 57, 60, 58, 67, 63, 64, 64, 58, 69, 69, 68, 69, 63, 64, 69, 73, 68, 67, 74, 75, 76, 79, 84, 86, 80, 86, 83, 86, 87, 90, 84, 87, 83, 90, 94, 96, 95, 95, 97, 104, 98, 107, 101, 98, 106, 102, 100, 106, 99, 101, 108, 106, 102, 109, 107, 110, 110, 110, 109, 111, 112, 114, 115, 116, 125, 122, 119, 115, 119, 115, 123, 121, 117, 118, 123, 120, 119, 123, 123, 121, 120, 124, 127, 125, 129, 124, 130, 131, 132, 130, 132, 130, 133, 130, 126, 126, 134, 130, 142, 126, 164, 120, 115, 104, 97, 95, 92, 87, 93, 110, 122, 133, 137, 133, 129, 135, 131, 128, 127, 135, 131, 128, 126, 128, 132, 131, 131, 130, 128, 128, 131, 128, 128, 123, 125, 123, 133, 128, 128, 123, 127, 130, 124, 127, 118, 127, 117, 118, 122, 126, 121, 115, 120, 117, 117, 116, 123, 117, 113, 110, 113, 111, 107, 103, 101, 103, 109, 106, 113, 108, 107, 102, 100, 99, 97, 99, 96, 97, 93, 88, 95, 100, 93, 93, 88, 86, 86, 86, 87, 85, 94, 87, 84, 80, 77, 78, 75, 73, 80, 78, 74, 73, 68, 69, 72, 74, 65, 63, 60, 64, 62, 61, 61, 65, 65, 64, 57, 57, 61, 61, 59, 56, 57, 27, 34, 31, 29, 30, 36, 36, 25, 25, 31, 30, 33, 31, 31, 39, 37, 39, 39, 42, 45, 45, 44, 48, 48, 46, 54, 55, 57, 56, 56, 57, 58, 60, 54, 60, 61, 64, 60, 59, 64, 63, 67, 66, 67, 65, 64, 67, 71, 72, 69, 71, 78, 80, 73, 78, 84, 83, 81, 85, 84, 83, 88, 85, 81, 85, 85, 100, 92, 96, 96, 95, 93, 97, 92, 100, 97, 104, 106, 106, 103, 108, 107, 105, 110, 109, 109, 118, 110, 107, 109, 108, 118, 109, 115, 111, 114, 116, 120, 124, 120, 112, 119, 113, 116, 117, 119, 124, 123, 126, 125, 123, 121, 124, 127, 127, 124, 124, 126, 126, 128, 128, 133, 128, 128, 137, 135, 129, 126, 123, 129, 140, 135, 52, 133, 116, 114, 109, 93, 82, 85, 65, 90, 139, 135, 134, 133, 134, 133, 139, 134, 135, 130, 134, 132, 126, 128, 131, 126, 131, 136, 133, 131, 129, 132, 124, 126, 125, 128, 126, 132, 124, 128, 123, 127, 130, 125, 124, 120, 122, 114, 119, 119, 125, 124, 116, 117, 117, 120, 121, 117, 114, 118, 114, 112, 115, 113, 106, 103, 105, 106, 102, 105, 106, 105, 102, 99, 106, 100, 98, 94, 95, 96, 94, 95, 97, 91, 92, 89, 88, 90, 84, 87, 89, 88, 81, 88, 80, 76, 80, 75, 71, 77, 77, 74, 72, 70, 71, 74, 69, 63, 68, 63, 68, 65, 66, 66, 63, 65, 66, 58, 56, 58, 61, 58, 59, 60, 27, 35, 33, 31, 34, 35, 38, 33, 27, 30, 26, 30, 32, 35, 42, 42, 40, 42, 40, 44, 42, 47, 50, 50, 50, 52, 52, 56, 53, 54, 62, 54, 57, 54, 59, 62, 65, 61, 64, 60, 64, 66, 67, 69, 68, 64, 71, 70, 72, 68, 74, 80, 82, 75, 79, 82, 81, 83, 81, 86, 85, 89, 85, 84, 78, 84, 93, 94, 98, 99, 100, 94, 101, 100, 100, 98, 104, 101, 103, 105, 108, 107, 104, 110, 111, 112, 119, 108, 105, 111, 109, 112, 108, 111, 113, 116, 117, 112, 117, 118, 113, 120, 115, 115, 118, 124, 124, 120, 123, 127, 125, 124, 121, 125, 120, 129, 125, 125, 129, 128, 127, 127, 134, 129, 132, 131, 130, 131, 126, 123, 130, 150, 136, 97, 118, 120, 131, 127, 113, 100, 101, 142, 148, 138, 135, 130, 135, 130, 132, 134, 133, 135, 131, 134, 131, 135, 132, 129, 129, 130, 130, 130, 131, 135, 123, 127, 130, 127, 128, 128, 126, 129, 129, 125, 127, 130, 124, 123, 121, 118, 121, 118, 123, 123, 119, 116, 116, 117, 116, 117, 121, 118, 110, 114, 116, 114, 109, 108, 108, 108, 108, 105, 105, 104, 101, 100, 100, 99, 94, 96, 97, 93, 96, 97, 100, 100, 91, 86, 87, 89, 86, 84, 83, 87, 84, 81, 82, 82, 78, 76, 73, 80, 77, 69, 67, 69, 66, 76, 68, 70, 73, 65, 67, 67, 68, 70, 62, 60, 61, 60, 62, 61, 62, 58, 57, 57, 30, 34, 34, 35, 34, 35, 36, 40, 32, 30, 28, 28, 30, 35, 42, 42, 37, 46, 42, 41, 41, 46, 46, 48, 52, 49, 48, 53, 52, 53, 55, 57, 57, 53, 59, 60, 66, 66, 70, 58, 63, 65, 69, 69, 70, 64, 70, 70, 67, 67, 74, 79, 84, 76, 74, 79, 81, 81, 78, 85, 89, 89, 86, 87, 79, 83, 88, 93, 97, 98, 96, 96, 101, 100, 100, 104, 98, 102, 101, 103, 108, 106, 108, 114, 113, 110, 115, 111, 111, 112, 112, 113, 114, 109, 111, 113, 112, 113, 115, 116, 113, 120, 117, 118, 116, 123, 121, 125, 121, 126, 122, 122, 119, 121, 116, 123, 125, 126, 126, 129, 124, 128, 132, 128, 130, 133, 130, 128, 127, 126, 128, 164, 149, 147, 162, 153, 126, 131, 128, 128, 147, 171, 168, 137, 126, 127, 135, 130, 132, 136, 130, 135, 132, 135, 132, 134, 127, 132, 130, 129, 130, 131, 133, 134, 122, 132, 127, 128, 132, 127, 130, 127, 127, 124, 127, 130, 129, 125, 122, 119, 120, 120, 118, 120, 122, 117, 119, 117, 117, 115, 117, 123, 111, 116, 117, 112, 111, 115, 114, 114, 109, 105, 105, 102, 101, 99, 99, 98, 93, 94, 93, 91, 96, 94, 98, 101, 96, 88, 88, 89, 88, 81, 87, 85, 87, 80, 79, 80, 83, 75, 72, 82, 77, 72, 71, 75, 70, 76, 68, 69, 71, 61, 65, 63, 67, 69, 62, 55, 59, 62, 64, 62, 59, 55, 55, 57, 32, 32, 32, 33, 35, 35, 34, 39, 33, 31, 31, 28, 33, 38, 40, 40, 36, 44, 39, 37, 43, 47, 46, 49, 50, 47, 50, 52, 53, 57, 52, 58, 56, 58, 60, 58, 62, 67, 69, 64, 65, 65, 71, 68, 62, 65, 67, 72, 71, 73, 71, 75, 79, 75, 77, 84, 83, 82, 85, 85, 88, 88, 88, 89, 86, 81, 88, 94, 93, 93, 93, 95, 99, 102, 99, 106, 103, 102, 100, 104, 105, 105, 109, 109, 110, 111, 111, 108, 109, 110, 112, 111, 112, 109, 110, 117, 113, 117, 116, 118, 116, 121, 121, 122, 118, 121, 116, 122, 119, 125, 128, 125, 123, 121, 117, 122, 125, 127, 128, 130, 120, 128, 130, 131, 130, 131, 127, 130, 129, 134, 135, 209, 106, 134, 170, 169, 151, 150, 136, 137, 120, 92, 193, 176, 128, 130, 136, 130, 129, 131, 133, 131, 132, 135, 134, 137, 127, 131, 127, 132, 129, 133, 130, 125, 126, 130, 127, 131, 129, 126, 128, 126, 128, 125, 130, 129, 127, 122, 121, 123, 122, 120, 118, 121, 124, 115, 120, 115, 116, 117, 115, 118, 112, 111, 114, 112, 112, 118, 114, 114, 105, 106, 109, 103, 106, 101, 100, 98, 97, 97, 95, 91, 94, 91, 94, 99, 96, 86, 88, 88, 91, 84, 87, 86, 87, 82, 79, 76, 80, 76, 76, 85, 78, 77, 75, 77, 72, 72, 75, 69, 70, 61, 67, 65, 65, 65, 59, 60, 62, 65, 64, 63, 59, 56, 57, 59, 33, 30, 33, 33, 37, 39, 37, 38, 33, 34, 32, 31, 35, 36, 41, 40, 39, 39, 36, 42, 45, 45, 48, 52, 51, 48, 54, 53, 51, 53, 54, 59, 60, 58, 57, 59, 61, 62, 62, 65, 65, 66, 67, 69, 60, 68, 66, 68, 72, 73, 69, 75, 76, 74, 80, 88, 82, 82, 84, 87, 83, 87, 89, 88, 92, 84, 93, 93, 96, 91, 91, 93, 95, 100, 101, 100, 106, 102, 103, 106, 106, 107, 109, 103, 107, 110, 109, 107, 109, 110, 116, 110, 112, 108, 110, 114, 116, 122, 121, 120, 116, 121, 122, 124, 121, 119, 124, 121, 123, 126, 130, 127, 123, 123, 121, 128, 128, 127, 129, 127, 123, 127, 128, 130, 128, 131, 129, 132, 134, 133, 155, 209, 143, 119, 134, 132, 140, 129, 120, 109, 89, 67, 113, 159, 132, 134, 139, 135, 136, 132, 137, 129, 135, 132, 132, 135, 129, 131, 129, 132, 131, 135, 131, 125, 127, 126, 128, 131, 128, 126, 125, 123, 127, 129, 130, 133, 125, 126, 122, 124, 123, 122, 119, 118, 118, 114, 125, 117, 116, 119, 116, 115, 113, 109, 111, 107, 112, 112, 115, 113, 104, 105, 107, 107, 105, 104, 103, 100, 98, 103, 102, 98, 99, 91, 89, 94, 95, 85, 81, 86, 88, 88, 85, 87, 83, 85, 83, 78, 80, 79, 77, 81, 80, 77, 76, 75, 73, 69, 76, 75, 71, 66, 68, 65, 64, 66, 60, 66, 62, 63, 65, 64, 62, 61, 57, 55, 34, 31, 33, 34, 37, 40, 38, 42, 38, 34, 33, 34, 37, 34, 41, 35, 39, 41, 42, 42, 44, 44, 47, 51, 50, 51, 58, 55, 56, 54, 54, 63, 64, 55, 59, 63, 60, 59, 64, 65, 68, 70, 67, 61, 64, 68, 71, 72, 75, 71, 71, 73, 78, 72, 76, 83, 76, 82, 82, 86, 83, 88, 91, 88, 90, 87, 98, 93, 101, 98, 93, 99, 91, 96, 97, 98, 102, 102, 103, 107, 107, 103, 103, 100, 107, 108, 110, 110, 110, 110, 113, 110, 107, 110, 115, 113, 116, 124, 123, 120, 116, 122, 123, 122, 125, 121, 120, 120, 124, 124, 126, 128, 123, 124, 126, 128, 133, 127, 128, 129, 128, 132, 126, 130, 131, 133, 135, 130, 132, 134, 133, 119, 146, 152, 96, 104, 100, 96, 102, 86, 82, 78, 57, 91, 130, 135, 139, 132, 136, 134, 131, 125, 136, 134, 134, 131, 125, 127, 130, 125, 130, 132, 133, 130, 124, 127, 129, 134, 124, 125, 129, 125, 129, 131, 130, 130, 119, 123, 123, 123, 131, 126, 122, 119, 116, 116, 123, 120, 114, 112, 115, 116, 115, 114, 112, 112, 114, 110, 113, 112, 108, 104, 98, 102, 100, 96, 97, 97, 102, 106, 101, 97, 100, 96, 91, 95, 95, 92, 82, 86, 84, 80, 88, 89, 91, 87, 86, 82, 79, 77, 77, 75, 80, 77, 78, 70, 70, 64, 67, 75, 74, 70, 65, 64, 63, 67, 64, 63, 59, 64, 64, 58, 57, 54, 58, 56, 29, 30, 32, 37, 37, 36, 41, 46, 39, 36, 34, 34, 40, 34, 41, 35, 39, 41, 43, 39, 42, 47, 47, 48, 53, 57, 58, 52, 58, 60, 52, 61, 60, 60, 62, 56, 56, 59, 64, 62, 61, 66, 68, 64, 68, 68, 73, 72, 69, 70, 75, 76, 79, 69, 72, 82, 79, 82, 86, 84, 88, 87, 92, 89, 84, 88, 94, 89, 92, 99, 94, 96, 94, 100, 92, 98, 96, 99, 101, 104, 104, 102, 100, 103, 108, 108, 113, 112, 115, 113, 114, 117, 109, 115, 113, 109, 112, 119, 115, 116, 116, 118, 124, 121, 127, 125, 119, 118, 120, 124, 120, 126, 124, 122, 126, 134, 134, 126, 125, 123, 125, 132, 133, 128, 131, 130, 132, 127, 128, 129, 107, 49, 77, 166, 99, 88, 82, 75, 76, 77, 79, 75, 73, 88, 131, 131, 133, 133, 129, 134, 135, 133, 133, 135, 130, 133, 133, 134, 133, 125, 128, 129, 128, 127, 127, 129, 131, 130, 126, 126, 127, 127, 135, 129, 131, 127, 117, 120, 120, 122, 128, 124, 121, 122, 123, 123, 120, 120, 119, 114, 116, 115, 113, 112, 108, 108, 111, 110, 109, 107, 111, 105, 101, 106, 103, 101, 99, 96, 102, 102, 99, 95, 96, 96, 92, 95, 94, 92, 87, 88, 88, 86, 84, 90, 89, 84, 84, 80, 77, 77, 79, 74, 81, 77, 76, 74, 67, 68, 74, 67, 67, 73, 66, 64, 59, 63, 65, 59, 64, 64, 65, 62, 59, 55, 58, 59, 28, 30, 31, 36, 36, 34, 43, 43, 36, 36, 34, 36, 37, 33, 41, 41, 40, 38, 42, 42, 43, 47, 46, 50, 52, 57, 55, 51, 57, 56, 51, 61, 55, 61, 60, 56, 56, 59, 61, 67, 66, 68, 72, 69, 68, 74, 76, 69, 70, 74, 75, 72, 69, 72, 77, 82, 83, 81, 87, 82, 89, 81, 87, 89, 83, 87, 90, 87, 90, 96, 92, 96, 99, 105, 91, 95, 94, 96, 99, 99, 102, 104, 100, 105, 105, 109, 110, 111, 115, 116, 115, 111, 111, 114, 114, 114, 113, 116, 112, 116, 117, 118, 120, 116, 123, 124, 122, 120, 121, 123, 121, 127, 125, 121, 123, 124, 125, 125, 132, 129, 123, 125, 133, 128, 135, 131, 128, 127, 125, 132, 113, 45, 62, 102, 80, 109, 117, 111, 87, 73, 75, 79, 74, 90, 133, 134, 129, 138, 131, 133, 132, 132, 131, 133, 132, 130, 131, 130, 132, 131, 129, 132, 127, 128, 134, 128, 131, 131, 128, 126, 130, 129, 127, 125, 131, 126, 121, 126, 124, 124, 121, 124, 126, 120, 120, 123, 120, 118, 119, 117, 119, 117, 114, 111, 110, 108, 110, 111, 108, 101, 111, 107, 107, 113, 104, 106, 104, 100, 100, 100, 100, 99, 95, 94, 92, 94, 96, 89, 89, 88, 85, 88, 82, 92, 86, 84, 84, 83, 79, 78, 79, 78, 81, 78, 76, 72, 59, 71, 72, 70, 67, 73, 68, 64, 62, 62, 63, 59, 70, 62, 63, 58, 55, 58, 57, 60, 32, 32, 32, 33, 36, 37, 43, 43, 37, 37, 34, 37, 37, 36, 40, 44, 39, 39, 41, 43, 46, 52, 48, 47, 49, 53, 55, 54, 56, 53, 51, 58, 54, 56, 61, 61, 61, 61, 63, 67, 66, 66, 68, 69, 67, 70, 75, 74, 74, 75, 75, 72, 74, 73, 78, 78, 86, 81, 85, 82, 86, 82, 86, 89, 85, 84, 88, 85, 95, 93, 95, 96, 94, 96, 95, 97, 99, 98, 97, 100, 105, 104, 97, 103, 101, 113, 109, 111, 112, 110, 111, 112, 113, 111, 114, 111, 114, 117, 116, 118, 115, 115, 114, 117, 122, 121, 122, 121, 126, 120, 124, 125, 124, 122, 121, 123, 124, 126, 130, 125, 122, 128, 127, 130, 135, 133, 129, 130, 127, 134, 110, 62, 69, 77, 77, 116, 121, 136, 107, 71, 70, 75, 75, 89, 133, 136, 133, 136, 131, 134, 135, 133, 133, 132, 132, 129, 130, 132, 132, 131, 128, 132, 129, 131, 134, 129, 129, 131, 128, 127, 129, 129, 123, 128, 126, 126, 126, 127, 126, 130, 124, 123, 130, 119, 119, 122, 116, 116, 114, 116, 116, 117, 110, 107, 109, 111, 107, 108, 103, 98, 106, 108, 107, 109, 103, 102, 99, 103, 101, 102, 100, 98, 94, 96, 94, 96, 96, 92, 91, 86, 90, 91, 87, 87, 85, 81, 82, 82, 76, 79, 78, 79, 76, 74, 75, 76, 65, 70, 70, 75, 67, 70, 67, 63, 66, 67, 60, 59, 67, 61, 65, 60, 56, 59, 57, 56, 30, 31, 31, 31, 38, 37, 41, 42, 38, 35, 40, 32, 39, 37, 41, 43, 37, 45, 44, 41, 44, 47, 50, 50, 47, 53, 50, 55, 52, 55, 53, 55, 52, 58, 60, 61, 67, 66, 70, 68, 64, 64, 64, 69, 67, 68, 72, 70, 79, 82, 77, 76, 72, 70, 77, 75, 85, 86, 82, 81, 83, 87, 90, 91, 85, 85, 91, 87, 93, 89, 94, 95, 89, 94, 97, 98, 100, 100, 97, 103, 107, 105, 99, 106, 104, 110, 108, 107, 107, 110, 110, 109, 112, 109, 114, 116, 112, 114, 114, 114, 110, 112, 113, 115, 120, 120, 124, 121, 124, 119, 124, 123, 123, 123, 122, 125, 127, 126, 127, 124, 122, 124, 123, 130, 127, 135, 130, 132, 129, 133, 116, 69, 70, 78, 85, 119, 120, 134, 114, 68, 73, 73, 73, 86, 129, 128, 136, 135, 132, 130, 136, 133, 131, 135, 133, 131, 130, 130, 136, 132, 127, 128, 129, 128, 130, 135, 126, 129, 131, 128, 124, 125, 126, 130, 124, 129, 129, 129, 127, 131, 125, 125, 131, 122, 121, 119, 114, 113, 114, 117, 113, 112, 113, 111, 109, 112, 111, 112, 108, 105, 103, 104, 104, 110, 102, 105, 96, 102, 100, 98, 102, 100, 95, 98, 91, 91, 93, 94, 89, 86, 92, 90, 89, 87, 88, 86, 84, 78, 76, 81, 82, 78, 74, 73, 74, 76, 66, 67, 69, 71, 67, 68, 67, 68, 67, 65, 62, 60, 63, 60, 60, 61, 56, 60, 61, 57, 30, 32, 33, 32, 37, 38, 43, 42, 41, 37, 39, 36, 36, 41, 43, 43, 37, 47, 49, 41, 44, 45, 50, 52, 47, 51, 48, 53, 54, 56, 55, 56, 58, 64, 56, 64, 66, 71, 69, 69, 65, 61, 64, 73, 69, 71, 73, 65, 76, 84, 75, 75, 68, 75, 75, 77, 84, 87, 79, 80, 80, 85, 91, 90, 85, 88, 92, 91, 91, 89, 96, 94, 91, 99, 97, 99, 100, 102, 101, 103, 106, 102, 99, 105, 108, 114, 108, 106, 109, 107, 108, 112, 113, 111, 113, 115, 115, 114, 115, 111, 110, 115, 116, 116, 120, 119, 119, 120, 123, 120, 121, 122, 122, 122, 126, 125, 126, 122, 123, 124, 124, 125, 124, 126, 123, 134, 128, 130, 129, 132, 115, 67, 70, 80, 79, 119, 118, 128, 117, 70, 72, 74, 73, 89, 128, 127, 132, 133, 133, 132, 135, 135, 131, 135, 131, 131, 131, 128, 128, 132, 127, 127, 131, 131, 131, 131, 133, 124, 127, 125, 126, 128, 127, 135, 125, 127, 126, 127, 128, 130, 126, 125, 124, 123, 124, 119, 119, 114, 118, 120, 116, 112, 108, 111, 113, 112, 109, 113, 110, 108, 107, 107, 104, 108, 101, 105, 99, 100, 98, 93, 99, 97, 93, 99, 93, 89, 94, 93, 86, 86, 91, 87, 89, 86, 82, 85, 86, 80, 81, 78, 79, 76, 73, 75, 76, 75, 67, 70, 71, 69, 68, 68, 64, 68, 66, 63, 65, 64, 62, 56, 56, 63, 59, 59, 58, 56, 30, 29, 32, 36, 42, 40, 44, 44, 42, 38, 37, 43, 41, 42, 46, 44, 42, 48, 52, 44, 47, 48, 49, 50, 48, 50, 56, 54, 56, 60, 60, 59, 60, 62, 57, 66, 61, 70, 65, 64, 64, 57, 67, 68, 65, 69, 71, 71, 72, 79, 72, 77, 77, 76, 74, 82, 80, 83, 81, 82, 83, 83, 89, 88, 85, 86, 88, 96, 89, 90, 96, 96, 92, 98, 96, 96, 100, 104, 108, 105, 104, 101, 107, 103, 106, 109, 105, 112, 108, 106, 107, 113, 110, 110, 116, 119, 117, 114, 118, 113, 111, 116, 119, 120, 122, 123, 121, 126, 127, 125, 123, 121, 119, 124, 125, 125, 125, 123, 124, 128, 131, 130, 130, 131, 130, 131, 132, 133, 132, 132, 114, 65, 68, 82, 79, 119, 119, 123, 114, 73, 73, 76, 73, 90, 127, 132, 131, 131, 129, 130, 129, 134, 130, 133, 132, 130, 138, 133, 128, 134, 131, 129, 130, 132, 131, 128, 132, 125, 125, 127, 127, 126, 125, 134, 127, 126, 122, 118, 124, 127, 126, 128, 118, 120, 116, 117, 117, 115, 122, 123, 119, 115, 113, 112, 112, 109, 104, 106, 108, 102, 106, 107, 107, 111, 104, 104, 104, 102, 102, 95, 95, 98, 98, 92, 92, 84, 86, 89, 87, 87, 90, 88, 82, 79, 82, 84, 84, 83, 88, 80, 73, 76, 72, 70, 76, 72, 68, 68, 74, 75, 71, 69, 62, 63, 65, 62, 63, 62, 62, 58, 55, 60, 62, 61, 60, 57, 33, 29, 31, 33, 36, 36, 41, 45, 40, 36, 40, 36, 43, 40, 49, 45, 45, 47, 50, 48, 47, 53, 52, 50, 50, 54, 61, 54, 56, 56, 59, 60, 56, 60, 67, 64, 62, 61, 66, 66, 62, 61, 66, 72, 71, 70, 66, 76, 77, 76, 68, 72, 73, 77, 81, 84, 79, 83, 80, 82, 83, 86, 84, 87, 83, 80, 88, 96, 91, 91, 94, 99, 95, 100, 98, 95, 102, 101, 101, 96, 102, 102, 100, 102, 105, 101, 107, 109, 106, 112, 108, 117, 111, 109, 113, 116, 113, 113, 121, 114, 114, 117, 119, 122, 123, 125, 122, 126, 126, 125, 124, 124, 121, 126, 125, 125, 122, 126, 124, 127, 128, 125, 126, 128, 127, 133, 138, 136, 132, 129, 115, 64, 79, 78, 78, 115, 119, 124, 115, 77, 76, 80, 79, 93, 127, 131, 131, 129, 128, 130, 127, 136, 133, 125, 131, 129, 133, 134, 128, 128, 135, 131, 129, 131, 134, 134, 128, 130, 127, 131, 128, 126, 122, 129, 129, 127, 123, 115, 125, 129, 128, 127, 121, 118, 117, 122, 120, 113, 122, 122, 119, 116, 111, 111, 109, 112, 110, 105, 110, 108, 107, 103, 104, 111, 108, 102, 107, 106, 106, 100, 99, 97, 103, 97, 98, 94, 93, 96, 88, 92, 85, 92, 89, 82, 79, 84, 85, 84, 83, 80, 72, 71, 76, 72, 74, 74, 76, 67, 70, 75, 68, 71, 64, 63, 63, 60, 63, 62, 62, 66, 61, 56, 60, 62, 60, 56, 34, 33, 32, 32, 33, 33, 38, 43, 41, 36, 41, 43, 47, 44, 47, 44, 48, 46, 49, 50, 45, 51, 50, 49, 53, 54, 55, 54, 59, 58, 57, 56, 55, 58, 65, 64, 62, 61, 63, 68, 62, 67, 69, 69, 70, 72, 67, 75, 75, 76, 72, 74, 72, 76, 78, 76, 80, 83, 75, 83, 82, 88, 85, 88, 87, 83, 87, 88, 89, 93, 96, 97, 93, 97, 96, 95, 100, 98, 103, 99, 101, 100, 102, 99, 104, 101, 108, 103, 106, 111, 108, 111, 112, 112, 115, 116, 113, 116, 122, 115, 115, 116, 119, 125, 123, 126, 125, 125, 128, 127, 120, 125, 125, 126, 128, 126, 125, 127, 125, 125, 128, 128, 129, 128, 126, 133, 133, 134, 128, 126, 116, 62, 64, 76, 79, 117, 119, 122, 111, 73, 72, 75, 78, 91, 130, 125, 129, 129, 131, 133, 133, 133, 133, 128, 126, 122, 133, 131, 136, 131, 123, 120, 125, 131, 132, 132, 131, 129, 129, 132, 131, 130, 125, 130, 130, 127, 125, 120, 128, 133, 126, 123, 118, 114, 119, 123, 124, 114, 121, 122, 121, 117, 108, 109, 110, 112, 108, 105, 109, 107, 107, 103, 101, 106, 107, 104, 108, 105, 101, 98, 101, 96, 100, 98, 97, 96, 94, 91, 85, 89, 84, 84, 86, 82, 82, 84, 84, 80, 80, 82, 77, 75, 79, 76, 71, 73, 77, 70, 71, 71, 64, 69, 66, 65, 64, 64, 67, 65, 63, 64, 61, 60, 55, 57, 62, 56, 37, 32, 30, 33, 36, 35, 38, 41, 39, 37, 40, 45, 41, 47, 45, 43, 47, 48, 51, 55, 49, 51, 50, 50, 54, 57, 54, 55, 57, 56, 58, 56, 57, 59, 60, 64, 60, 64, 63, 69, 62, 65, 64, 68, 69, 73, 73, 71, 77, 75, 72, 75, 72, 75, 75, 74, 82, 80, 75, 81, 80, 84, 88, 87, 90, 90, 86, 88, 87, 91, 99, 99, 91, 94, 94, 95, 98, 99, 102, 99, 99, 101, 107, 99, 104, 104, 105, 106, 102, 107, 109, 109, 114, 115, 116, 114, 115, 115, 124, 119, 111, 117, 119, 125, 124, 126, 125, 123, 125, 121, 121, 123, 124, 127, 126, 126, 124, 126, 124, 125, 128, 128, 125, 128, 129, 130, 128, 131, 128, 124, 114, 61, 55, 77, 80, 119, 121, 122, 112, 73, 70, 73, 76, 89, 128, 124, 130, 127, 130, 134, 136, 133, 134, 134, 127, 126, 133, 131, 128, 134, 125, 125, 127, 135, 130, 131, 130, 132, 129, 134, 130, 130, 130, 129, 133, 131, 127, 124, 127, 131, 124, 121, 122, 117, 119, 117, 124, 117, 119, 121, 121, 120, 114, 109, 110, 111, 109, 109, 108, 104, 104, 106, 103, 104, 104, 101, 103, 102, 100, 99, 102, 96, 91, 93, 94, 96, 92, 87, 87, 86, 88, 92, 89, 83, 85, 86, 87, 79, 80, 77, 73, 79, 77, 78, 77, 70, 72, 73, 71, 66, 64, 63, 60, 66, 67, 66, 69, 65, 62, 61, 61, 62, 54, 56, 59, 57, 36, 31, 29, 33, 36, 30, 37, 38, 36, 37, 42, 40, 39, 41, 44, 42, 46, 50, 52, 48, 49, 49, 49, 49, 55, 58, 55, 56, 55, 53, 58, 57, 58, 61, 64, 62, 62, 58, 65, 68, 63, 67, 66, 71, 72, 72, 72, 72, 74, 72, 72, 78, 77, 76, 74, 74, 85, 81, 79, 73, 82, 84, 87, 86, 89, 88, 84, 87, 89, 91, 98, 96, 92, 92, 91, 96, 97, 98, 97, 99, 97, 100, 99, 100, 103, 99, 98, 104, 106, 111, 112, 109, 113, 113, 114, 113, 116, 120, 123, 117, 111, 117, 115, 121, 123, 127, 125, 124, 126, 120, 123, 121, 122, 123, 122, 124, 124, 125, 125, 126, 130, 129, 126, 130, 128, 127, 131, 130, 132, 123, 115, 62, 67, 77, 82, 117, 124, 129, 117, 73, 69, 75, 73, 88, 128, 127, 131, 126, 129, 132, 130, 133, 133, 133, 127, 133, 132, 128, 132, 135, 129, 130, 129, 133, 128, 131, 128, 129, 126, 133, 129, 130, 130, 128, 134, 132, 130, 128, 125, 125, 123, 121, 123, 121, 123, 119, 120, 118, 117, 120, 120, 121, 114, 111, 110, 108, 112, 111, 107, 107, 100, 106, 106, 102, 102, 101, 100, 100, 97, 100, 102, 94, 90, 92, 89, 91, 92, 86, 87, 86, 88, 94, 93, 85, 88, 86, 87, 85, 81, 76, 74, 75, 76, 79, 77, 68, 71, 71, 70, 67, 64, 63, 60, 66, 66, 65, 65, 61, 63, 61, 60, 61, 61, 58, 54, 58, 31, 30, 29, 28, 32, 30, 38, 35, 38, 34, 46, 41, 43, 45, 42, 42, 45, 48, 48, 43, 48, 51, 54, 53, 57, 53, 55, 55, 57, 55, 61, 52, 60, 62, 61, 60, 57, 61, 66, 65, 63, 67, 69, 69, 67, 67, 70, 74, 75, 70, 75, 77, 76, 74, 72, 74, 84, 81, 80, 79, 86, 85, 82, 88, 85, 88, 81, 86, 92, 90, 92, 94, 93, 89, 92, 93, 94, 98, 95, 99, 95, 102, 99, 102, 102, 98, 99, 106, 106, 114, 111, 112, 111, 112, 115, 111, 115, 123, 120, 116, 118, 112, 115, 121, 123, 123, 128, 124, 125, 132, 127, 122, 120, 122, 123, 119, 122, 125, 132, 126, 127, 125, 127, 129, 127, 128, 128, 130, 127, 129, 112, 57, 71, 83, 77, 117, 121, 130, 119, 79, 71, 72, 71, 95, 131, 124, 128, 131, 133, 126, 128, 130, 128, 127, 123, 135, 126, 132, 132, 130, 133, 132, 126, 129, 128, 131, 130, 127, 128, 127, 125, 129, 129, 130, 131, 126, 131, 126, 125, 123, 129, 125, 123, 120, 121, 122, 120, 115, 114, 118, 117, 121, 113, 113, 112, 109, 111, 107, 111, 112, 103, 101, 105, 106, 104, 102, 103, 104, 97, 103, 100, 94, 97, 88, 87, 82, 90, 85, 85, 92, 89, 90, 89, 83, 90, 81, 83, 84, 81, 85, 74, 71, 75, 77, 76, 69, 69, 70, 72, 73, 65, 64, 67, 67, 70, 67, 64, 59, 66, 63, 63, 57, 63, 62, 54, 55, 34, 33, 30, 27, 29, 28, 35, 40, 36, 38, 41, 44, 44, 43, 45, 45, 45, 44, 45, 47, 50, 51, 57, 54, 51, 55, 51, 54, 59, 58, 57, 56, 61, 61, 60, 62, 61, 63, 61, 68, 67, 64, 66, 64, 65, 69, 72, 72, 76, 73, 76, 77, 73, 70, 71, 75, 81, 83, 79, 80, 82, 86, 85, 89, 87, 85, 80, 87, 92, 87, 90, 94, 91, 92, 89, 90, 94, 101, 97, 95, 94, 104, 103, 106, 110, 109, 110, 108, 104, 107, 110, 107, 115, 114, 106, 112, 117, 122, 117, 116, 116, 112, 118, 128, 123, 121, 123, 123, 124, 128, 128, 124, 124, 120, 122, 121, 123, 124, 131, 129, 125, 127, 127, 125, 129, 128, 127, 131, 131, 126, 117, 74, 69, 80, 76, 121, 129, 132, 117, 87, 81, 72, 69, 90, 134, 124, 126, 129, 130, 126, 130, 127, 130, 131, 127, 131, 125, 130, 129, 130, 130, 123, 126, 125, 126, 131, 125, 131, 134, 131, 131, 127, 123, 125, 127, 127, 121, 122, 126, 122, 126, 124, 121, 125, 128, 120, 123, 111, 108, 115, 121, 119, 110, 112, 113, 115, 109, 106, 102, 111, 107, 105, 106, 107, 101, 103, 101, 108, 94, 96, 92, 97, 99, 91, 86, 83, 89, 92, 85, 88, 95, 88, 85, 84, 92, 82, 85, 87, 79, 80, 76, 78, 78, 69, 71, 69, 72, 71, 66, 71, 69, 67, 65, 65, 69, 64, 63, 64, 66, 64, 66, 60, 57, 58, 59, 57, 30, 32, 33, 33, 31, 34, 34, 41, 33, 38, 39, 41, 41, 42, 44, 46, 50, 45, 43, 52, 52, 48, 52, 52, 55, 58, 50, 51, 54, 60, 56, 55, 57, 59, 60, 61, 62, 63, 60, 69, 68, 63, 63, 66, 66, 68, 73, 69, 71, 73, 71, 75, 70, 76, 78, 74, 73, 78, 76, 79, 75, 86, 81, 83, 89, 85, 89, 85, 88, 85, 87, 92, 95, 97, 91, 92, 93, 95, 95, 97, 100, 105, 103, 104, 110, 110, 108, 105, 110, 111, 115, 109, 110, 113, 109, 109, 111, 117, 117, 121, 119, 116, 119, 121, 115, 118, 125, 119, 125, 131, 126, 125, 124, 121, 125, 120, 128, 128, 130, 126, 128, 125, 126, 126, 128, 126, 127, 129, 128, 125, 117, 79, 73, 78, 77, 118, 121, 124, 115, 79, 74, 73, 77, 87, 126, 123, 126, 128, 123, 126, 129, 126, 133, 133, 130, 133, 131, 132, 129, 133, 135, 123, 123, 124, 122, 130, 126, 124, 135, 129, 131, 129, 130, 127, 124, 129, 122, 122, 122, 123, 126, 124, 119, 116, 122, 117, 120, 119, 115, 111, 112, 113, 115, 113, 111, 112, 109, 110, 106, 110, 107, 106, 106, 109, 102, 99, 102, 101, 98, 98, 97, 92, 92, 95, 93, 89, 87, 90, 86, 85, 89, 84, 86, 83, 88, 82, 82, 83, 76, 74, 77, 75, 76, 73, 72, 71, 74, 76, 66, 67, 66, 68, 68, 65, 63, 63, 62, 67, 64, 63, 66, 63, 57, 57, 65, 61, 29, 31, 33, 33, 29, 32, 36, 39, 39, 38, 39, 41, 40, 42, 43, 46, 51, 47, 47, 54, 51, 48, 49, 50, 52, 54, 55, 51, 51, 57, 53, 56, 57, 58, 62, 60, 61, 61, 64, 68, 68, 66, 65, 70, 69, 69, 74, 66, 71, 71, 71, 74, 72, 78, 78, 74, 76, 80, 81, 80, 76, 86, 82, 83, 89, 85, 85, 86, 90, 86, 90, 94, 92, 95, 93, 95, 93, 93, 94, 98, 97, 97, 101, 102, 107, 107, 107, 106, 113, 110, 111, 106, 112, 113, 109, 108, 116, 118, 120, 119, 118, 119, 118, 114, 118, 120, 122, 118, 124, 128, 128, 127, 122, 122, 126, 123, 126, 129, 127, 126, 128, 127, 127, 127, 125, 128, 129, 127, 122, 127, 112, 72, 73, 76, 73, 116, 121, 125, 112, 82, 83, 80, 78, 93, 130, 128, 130, 131, 124, 131, 131, 126, 131, 132, 135, 133, 129, 128, 133, 130, 132, 125, 122, 123, 125, 128, 130, 128, 129, 125, 126, 128, 131, 128, 124, 126, 126, 126, 123, 120, 123, 120, 124, 117, 121, 122, 124, 120, 114, 112, 112, 119, 116, 117, 114, 106, 110, 105, 104, 104, 110, 106, 103, 105, 103, 98, 103, 100, 97, 101, 98, 92, 94, 100, 99, 85, 88, 90, 87, 87, 84, 82, 86, 86, 87, 87, 83, 78, 78, 75, 78, 72, 74, 75, 70, 70, 71, 72, 67, 65, 69, 64, 68, 70, 67, 63, 59, 62, 64, 59, 62, 64, 60, 56, 63, 61, 28, 32, 33, 34, 30, 34, 38, 36, 39, 35, 40, 45, 40, 43, 46, 46, 47, 46, 48, 53, 49, 49, 48, 52, 54, 58, 54, 51, 52, 55, 52, 61, 58, 61, 64, 62, 60, 59, 65, 66, 69, 67, 67, 72, 69, 66, 75, 67, 70, 68, 70, 69, 69, 77, 76, 74, 79, 80, 83, 78, 81, 81, 81, 84, 88, 87, 83, 85, 90, 87, 89, 91, 88, 94, 93, 97, 95, 93, 94, 97, 98, 97, 99, 100, 104, 105, 107, 108, 112, 111, 112, 105, 110, 111, 112, 108, 118, 118, 120, 117, 119, 119, 116, 114, 113, 118, 119, 120, 124, 127, 123, 121, 121, 124, 125, 126, 124, 128, 126, 129, 124, 127, 125, 127, 122, 132, 128, 128, 126, 129, 114, 72, 75, 72, 73, 117, 122, 128, 115, 78, 73, 79, 81, 99, 128, 131, 132, 135, 128, 131, 135, 129, 133, 132, 132, 134, 136, 127, 133, 130, 134, 130, 123, 121, 129, 132, 125, 123, 127, 128, 127, 126, 127, 127, 126, 124, 127, 123, 123, 120, 121, 124, 122, 119, 118, 120, 125, 126, 115, 113, 111, 117, 115, 115, 115, 109, 112, 106, 105, 105, 112, 107, 102, 103, 104, 102, 101, 104, 95, 99, 98, 95, 96, 96, 100, 93, 91, 91, 86, 84, 84, 81, 79, 81, 84, 81, 84, 80, 80, 73, 71, 70, 74, 72, 72, 70, 71, 67, 68, 69, 69, 65, 70, 72, 70, 61, 61, 61, 66, 56, 62, 65, 60, 56, 56, 58, 31, 35, 33, 33, 28, 34, 36, 37, 37, 37, 41, 46, 42, 48, 47, 47, 46, 46, 45, 48, 47, 47, 49, 53, 52, 62, 59, 57, 55, 57, 57, 57, 57, 64, 66, 61, 57, 61, 63, 65, 69, 66, 67, 72, 65, 64, 74, 70, 70, 70, 73, 69, 70, 73, 73, 74, 78, 79, 80, 78, 84, 80, 84, 86, 89, 88, 87, 87, 91, 87, 87, 91, 90, 95, 94, 98, 97, 94, 96, 95, 98, 101, 100, 100, 101, 105, 106, 109, 110, 112, 112, 105, 110, 109, 110, 110, 116, 117, 120, 116, 119, 117, 117, 120, 114, 118, 121, 117, 119, 126, 121, 119, 118, 121, 120, 124, 124, 132, 131, 131, 125, 124, 125, 130, 127, 133, 129, 129, 136, 131, 118, 77, 78, 70, 73, 115, 123, 127, 116, 81, 73, 76, 77, 102, 127, 133, 135, 134, 128, 134, 137, 132, 132, 135, 131, 125, 132, 127, 131, 128, 129, 128, 126, 126, 125, 131, 125, 127, 130, 129, 126, 125, 126, 126, 122, 121, 127, 121, 126, 124, 122, 125, 122, 120, 120, 124, 124, 124, 114, 112, 111, 118, 115, 112, 112, 111, 110, 111, 112, 111, 112, 110, 105, 107, 107, 105, 106, 104, 99, 94, 97, 96, 97, 97, 98, 92, 95, 93, 88, 86, 86, 85, 80, 77, 81, 81, 82, 79, 79, 77, 72, 70, 73, 70, 70, 70, 68, 67, 69, 71, 68, 63, 68, 70, 71, 62, 65, 65, 68, 58, 61, 63, 62, 59, 55, 58, 26, 32, 32, 35, 35, 39, 34, 38, 34, 35, 37, 44, 45, 48, 46, 48, 43, 47, 46, 47, 47, 46, 53, 54, 54, 55, 55, 55, 58, 59, 58, 55, 67, 66, 63, 61, 57, 62, 62, 66, 69, 68, 67, 67, 64, 68, 72, 64, 66, 70, 73, 72, 73, 71, 74, 78, 78, 78, 76, 80, 82, 82, 90, 87, 88, 86, 90, 89, 92, 85, 85, 89, 88, 86, 91, 96, 93, 89, 94, 96, 100, 100, 101, 100, 99, 107, 107, 109, 107, 111, 114, 112, 104, 108, 112, 111, 112, 116, 122, 119, 117, 117, 118, 118, 114, 120, 119, 126, 123, 127, 124, 119, 114, 120, 124, 120, 124, 130, 133, 134, 124, 128, 129, 132, 135, 130, 133, 126, 138, 130, 118, 81, 76, 70, 72, 114, 127, 128, 120, 81, 77, 74, 71, 98, 129, 131, 131, 134, 134, 132, 130, 131, 129, 131, 132, 127, 132, 129, 128, 126, 126, 129, 126, 122, 126, 129, 126, 123, 129, 127, 128, 124, 126, 133, 125, 128, 129, 122, 123, 118, 120, 126, 125, 121, 122, 123, 124, 127, 113, 113, 119, 115, 112, 115, 114, 109, 108, 112, 108, 108, 102, 108, 102, 100, 108, 108, 103, 97, 98, 96, 97, 104, 92, 96, 95, 88, 93, 97, 86, 88, 86, 85, 83, 79, 75, 80, 77, 79, 82, 77, 70, 68, 72, 70, 74, 72, 65, 72, 76, 72, 68, 63, 72, 66, 68, 65, 64, 66, 64, 65, 62, 58, 65, 61, 58, 60, 31, 27, 27, 33, 37, 34, 32, 34, 30, 33, 35, 34, 37, 41, 49, 48, 44, 50, 47, 48, 48, 51, 48, 54, 47, 50, 53, 48, 63, 55, 55, 57, 66, 65, 62, 64, 59, 54, 64, 70, 67, 69, 65, 61, 66, 67, 72, 71, 69, 63, 72, 70, 69, 71, 76, 79, 79, 81, 77, 84, 78, 88, 84, 84, 77, 77, 86, 91, 89, 90, 91, 89, 92, 87, 95, 95, 94, 94, 94, 100, 99, 102, 100, 103, 104, 106, 110, 109, 107, 111, 111, 104, 104, 113, 115, 109, 113, 117, 122, 115, 115, 117, 116, 117, 122, 126, 118, 129, 122, 124, 123, 121, 129, 123, 128, 116, 129, 123, 122, 123, 122, 125, 134, 130, 135, 132, 129, 131, 130, 127, 118, 73, 76, 73, 69, 113, 129, 130, 121, 87, 73, 77, 82, 92, 127, 129, 129, 130, 136, 135, 131, 127, 129, 131, 130, 127, 125, 123, 128, 125, 130, 133, 135, 123, 131, 130, 128, 124, 133, 128, 128, 123, 128, 133, 126, 122, 135, 124, 122, 129, 126, 122, 121, 120, 122, 123, 119, 116, 114, 117, 116, 119, 108, 113, 111, 109, 104, 113, 107, 108, 101, 102, 101, 105, 106, 98, 98, 95, 98, 101, 101, 104, 97, 97, 96, 92, 87, 96, 90, 89, 86, 90, 82, 80, 83, 78, 81, 84, 84, 79, 81, 75, 73, 76, 73, 70, 67, 73, 76, 74, 69, 63, 70, 65, 67, 64, 66, 63, 54, 57, 59, 63, 64, 58, 57, 58, 31, 25, 29, 32, 34, 33, 35, 32, 34, 37, 41, 40, 38, 45, 51, 50, 48, 47, 44, 44, 49, 51, 50, 53, 48, 54, 54, 52, 60, 53, 55, 54, 55, 58, 65, 68, 63, 59, 66, 73, 63, 64, 64, 70, 68, 66, 70, 70, 67, 66, 70, 71, 72, 69, 73, 74, 76, 79, 79, 81, 79, 84, 81, 86, 85, 82, 86, 86, 89, 87, 88, 86, 97, 91, 92, 101, 97, 94, 95, 100, 100, 100, 99, 105, 103, 106, 109, 107, 106, 109, 110, 108, 105, 112, 115, 110, 117, 120, 121, 118, 120, 115, 114, 116, 120, 123, 121, 125, 123, 126, 120, 122, 122, 121, 118, 127, 122, 130, 125, 134, 123, 126, 131, 128, 130, 139, 134, 134, 126, 128, 120, 76, 73, 72, 71, 114, 130, 127, 119, 83, 73, 79, 81, 89, 130, 129, 128, 126, 128, 128, 131, 130, 130, 126, 124, 123, 128, 132, 127, 124, 128, 128, 124, 126, 128, 126, 123, 125, 127, 128, 124, 125, 124, 126, 124, 127, 130, 127, 126, 124, 122, 125, 123, 123, 120, 118, 122, 115, 118, 114, 109, 118, 116, 116, 114, 114, 114, 112, 108, 112, 104, 103, 96, 101, 102, 105, 101, 98, 94, 96, 97, 98, 98, 95, 97, 100, 89, 92, 88, 90, 86, 84, 82, 80, 82, 80, 79, 86, 83, 82, 77, 72, 70, 71, 71, 70, 71, 71, 70, 70, 68, 63, 69, 69, 69, 66, 67, 66, 58, 61, 60, 63, 62, 59, 53, 52, 28, 24, 29, 33, 35, 35, 35, 28, 34, 36, 40, 40, 43, 46, 49, 49, 46, 45, 44, 41, 50, 52, 51, 48, 49, 59, 53, 54, 59, 52, 55, 57, 58, 62, 67, 67, 68, 65, 64, 67, 63, 63, 64, 70, 66, 63, 71, 72, 70, 70, 71, 74, 74, 68, 73, 75, 73, 76, 78, 76, 77, 81, 83, 86, 86, 86, 89, 88, 88, 90, 92, 89, 93, 93, 92, 93, 96, 94, 96, 97, 99, 97, 102, 102, 102, 105, 106, 105, 108, 110, 110, 103, 109, 112, 109, 109, 116, 119, 116, 117, 120, 119, 119, 116, 119, 119, 118, 120, 123, 122, 123, 126, 118, 117, 114, 131, 121, 131, 134, 122, 127, 126, 127, 125, 124, 135, 130, 131, 124, 128, 122, 74, 76, 73, 70, 113, 132, 127, 118, 83, 77, 78, 78, 93, 128, 128, 128, 128, 128, 130, 132, 130, 131, 127, 124, 123, 123, 127, 126, 119, 130, 131, 129, 124, 128, 128, 124, 125, 127, 127, 126, 123, 128, 129, 124, 132, 129, 126, 125, 123, 122, 123, 123, 122, 121, 117, 119, 126, 119, 115, 111, 106, 118, 113, 114, 115, 114, 112, 109, 109, 102, 106, 99, 102, 100, 103, 100, 102, 98, 93, 96, 96, 96, 98, 102, 100, 92, 94, 92, 92, 88, 87, 83, 80, 79, 80, 76, 81, 76, 82, 77, 72, 73, 74, 76, 73, 74, 74, 70, 65, 67, 66, 65, 67, 67, 62, 66, 67, 59, 61, 61, 60, 59, 58, 56, 51, 29, 27, 30, 34, 35, 35, 33, 28, 34, 35, 40, 39, 43, 44, 47, 45, 43, 45, 47, 45, 48, 47, 49, 47, 51, 63, 53, 53, 60, 55, 54, 60, 58, 61, 66, 65, 66, 66, 64, 61, 61, 61, 64, 71, 67, 66, 72, 71, 69, 70, 70, 75, 71, 71, 72, 72, 73, 79, 78, 79, 78, 82, 84, 81, 86, 85, 87, 92, 87, 93, 92, 90, 92, 90, 91, 96, 95, 94, 96, 94, 98, 97, 105, 98, 100, 103, 103, 102, 106, 108, 109, 104, 108, 109, 107, 110, 112, 116, 114, 116, 117, 119, 118, 114, 119, 120, 117, 116, 121, 118, 124, 116, 113, 120, 126, 120, 126, 127, 128, 120, 127, 126, 126, 126, 123, 128, 128, 127, 127, 124, 123, 81, 79, 76, 68, 112, 131, 129, 118, 80, 77, 78, 79, 97, 129, 129, 126, 125, 126, 130, 134, 132, 132, 130, 131, 126, 125, 119, 120, 123, 127, 125, 127, 121, 125, 127, 126, 125, 129, 129, 127, 127, 127, 125, 127, 130, 128, 125, 122, 118, 120, 119, 122, 119, 118, 116, 117, 119, 120, 117, 113, 110, 115, 110, 112, 116, 111, 110, 112, 109, 101, 103, 100, 103, 102, 98, 107, 100, 99, 95, 96, 97, 98, 99, 98, 100, 95, 92, 92, 93, 90, 86, 85, 85, 81, 82, 83, 81, 79, 77, 76, 71, 74, 74, 74, 75, 73, 76, 71, 64, 69, 65, 62, 63, 61, 59, 63, 65, 59, 61, 62, 61, 59, 58, 64, 58, 30, 29, 34, 34, 37, 34, 35, 33, 35, 36, 36, 40, 42, 42, 48, 46, 43, 39, 43, 51, 48, 47, 49, 48, 54, 58, 52, 52, 58, 54, 53, 62, 62, 60, 65, 63, 61, 66, 63, 67, 63, 64, 67, 63, 66, 70, 74, 71, 70, 73, 70, 72, 71, 71, 73, 74, 74, 81, 79, 83, 79, 83, 83, 81, 90, 86, 93, 91, 89, 94, 90, 95, 89, 90, 96, 101, 96, 98, 97, 93, 96, 97, 102, 98, 100, 102, 104, 103, 105, 105, 108, 108, 108, 109, 110, 112, 109, 114, 114, 117, 114, 114, 111, 113, 121, 121, 119, 117, 122, 121, 124, 113, 118, 125, 119, 114, 118, 119, 123, 128, 124, 126, 127, 128, 125, 125, 132, 129, 133, 125, 125, 103, 78, 85, 68, 111, 127, 130, 123, 82, 74, 80, 84, 97, 127, 129, 126, 126, 127, 131, 134, 131, 127, 127, 125, 130, 131, 125, 121, 126, 128, 124, 128, 122, 123, 127, 127, 123, 127, 130, 124, 127, 128, 123, 130, 127, 127, 124, 120, 115, 119, 120, 119, 118, 117, 116, 117, 119, 116, 116, 116, 112, 113, 109, 106, 112, 110, 106, 109, 111, 108, 106, 105, 103, 103, 98, 103, 97, 98, 96, 98, 107, 104, 97, 91, 94, 100, 90, 89, 91, 91, 89, 87, 83, 82, 82, 83, 80, 83, 77, 71, 71, 74, 69, 72, 71, 70, 73, 67, 65, 70, 66, 65, 64, 63, 64, 62, 62, 62, 61, 62, 63, 60, 57, 67, 61, 27, 29, 34, 35, 39, 35, 35, 35, 34, 37, 37, 41, 44, 39, 51, 49, 44, 42, 48, 50, 50, 54, 51, 48, 54, 56, 52, 50, 58, 53, 54, 58, 58, 58, 64, 60, 62, 67, 60, 65, 64, 64, 65, 64, 67, 69, 68, 67, 70, 71, 68, 67, 70, 73, 72, 75, 79, 83, 80, 78, 77, 80, 85, 85, 87, 81, 89, 93, 89, 89, 86, 92, 90, 92, 91, 98, 100, 94, 92, 94, 99, 101, 102, 101, 101, 103, 106, 104, 105, 103, 106, 105, 110, 112, 109, 112, 110, 113, 113, 115, 112, 114, 110, 117, 122, 121, 118, 120, 125, 125, 123, 117, 126, 114, 132, 185, 171, 146, 126, 118, 122, 126, 127, 128, 127, 125, 131, 131, 131, 125, 129, 125, 79, 83, 67, 111, 126, 130, 127, 89, 82, 87, 90, 96, 128, 130, 127, 126, 124, 127, 131, 131, 130, 128, 117, 127, 117, 110, 133, 115, 123, 133, 125, 124, 125, 132, 129, 121, 126, 128, 126, 124, 127, 119, 122, 124, 127, 123, 120, 118, 121, 120, 116, 118, 119, 119, 119, 115, 113, 114, 115, 114, 113, 111, 111, 114, 118, 105, 103, 109, 113, 113, 109, 104, 101, 99, 100, 104, 102, 94, 94, 107, 101, 97, 100, 102, 103, 92, 91, 90, 90, 90, 86, 82, 86, 87, 82, 73, 78, 76, 72, 73, 76, 71, 74, 75, 73, 74, 68, 68, 68, 70, 67, 65, 65, 67, 64, 63, 64, 65, 64, 68, 63, 59, 61, 56, 26, 28, 33, 33, 34, 35, 30, 33, 34, 35, 38, 40, 45, 47, 63, 51, 40, 44, 48, 45, 46, 52, 50, 53, 50, 56, 49, 49, 60, 54, 57, 55, 58, 58, 62, 60, 59, 65, 67, 60, 65, 63, 67, 65, 67, 65, 66, 69, 72, 68, 70, 71, 74, 75, 78, 84, 82, 78, 79, 78, 82, 77, 85, 85, 86, 85, 89, 94, 89, 88, 93, 97, 89, 99, 90, 103, 94, 94, 88, 91, 95, 100, 104, 103, 104, 105, 104, 104, 105, 102, 104, 106, 106, 108, 109, 110, 114, 116, 112, 113, 111, 111, 113, 117, 121, 122, 118, 117, 120, 123, 112, 124, 122, 96, 73, 69, 70, 39, 21, 76, 126, 126, 126, 128, 130, 126, 128, 129, 124, 133, 126, 105, 80, 75, 67, 111, 127, 124, 122, 87, 95, 104, 94, 93, 125, 129, 127, 126, 121, 124, 134, 136, 131, 125, 115, 115, 132, 166, 181, 167, 139, 131, 116, 126, 125, 129, 128, 123, 127, 127, 124, 128, 121, 125, 125, 125, 121, 122, 122, 121, 119, 118, 119, 118, 117, 123, 123, 112, 110, 113, 113, 111, 121, 112, 115, 109, 116, 105, 106, 106, 109, 114, 108, 108, 103, 104, 100, 101, 98, 102, 96, 98, 100, 93, 99, 102, 101, 91, 91, 91, 93, 90, 89, 86, 85, 84, 77, 77, 80, 84, 76, 71, 74, 73, 71, 75, 71, 71, 67, 64, 66, 70, 69, 64, 58, 62, 66, 65, 62, 66, 62, 68, 64, 59, 57, 55, 27, 33, 31, 30, 32, 37, 38, 37, 34, 34, 39, 47, 44, 49, 44, 41, 45, 46, 46, 46, 53, 50, 47, 54, 53, 52, 48, 49, 55, 54, 56, 57, 59, 55, 60, 58, 61, 59, 63, 65, 62, 61, 64, 66, 68, 67, 68, 69, 72, 71, 70, 68, 69, 70, 77, 81, 74, 69, 74, 80, 82, 80, 85, 90, 93, 89, 84, 85, 85, 89, 91, 89, 91, 101, 93, 94, 91, 94, 95, 97, 96, 92, 96, 100, 105, 102, 103, 102, 103, 101, 100, 105, 106, 102, 109, 112, 109, 112, 112, 107, 109, 113, 113, 112, 116, 118, 124, 115, 114, 123, 111, 118, 115, 46, 20, 25, 32, 27, 21, 27, 119, 131, 125, 133, 130, 125, 125, 125, 130, 131, 128, 99, 86, 81, 68, 102, 120, 123, 120, 87, 91, 91, 89, 90, 129, 131, 129, 125, 120, 122, 128, 136, 130, 120, 136, 77, 51, 62, 71, 88, 97, 100, 120, 119, 122, 126, 124, 120, 124, 128, 127, 124, 121, 127, 122, 125, 126, 124, 118, 121, 117, 119, 118, 118, 120, 116, 115, 111, 109, 117, 114, 108, 117, 118, 107, 106, 104, 102, 105, 99, 111, 111, 108, 105, 102, 104, 103, 99, 100, 105, 96, 97, 98, 94, 96, 99, 93, 97, 91, 94, 91, 86, 93, 86, 87, 78, 81, 82, 78, 78, 77, 78, 77, 74, 70, 76, 70, 70, 70, 64, 64, 68, 61, 65, 63, 65, 68, 61, 63, 64, 59, 58, 55, 60, 67, 63, 29, 33, 31, 34, 31, 35, 35, 36, 35, 37, 35, 44, 40, 41, 41, 41, 43, 47, 49, 43, 50, 50, 45, 56, 54, 52, 51, 51, 56, 53, 54, 57, 58, 57, 60, 56, 61, 60, 62, 62, 60, 61, 67, 63, 67, 65, 70, 70, 77, 73, 70, 73, 80, 74, 82, 82, 79, 77, 78, 79, 81, 83, 86, 92, 92, 90, 89, 86, 85, 88, 91, 88, 94, 97, 91, 94, 93, 98, 98, 97, 96, 92, 93, 100, 102, 101, 99, 105, 101, 100, 102, 103, 103, 105, 109, 111, 111, 113, 108, 107, 107, 110, 117, 113, 115, 115, 121, 117, 117, 124, 119, 122, 117, 18, 64, 85, 93, 99, 73, 14, 105, 131, 125, 130, 130, 127, 127, 123, 129, 126, 125, 147, 77, 71, 66, 101, 122, 123, 122, 92, 88, 93, 90, 88, 130, 131, 131, 130, 124, 126, 128, 127, 129, 129, 123, 33, 27, 16, 30, 16, 8, 68, 120, 119, 124, 123, 125, 122, 125, 125, 128, 124, 118, 121, 124, 125, 124, 124, 121, 124, 124, 128, 122, 117, 119, 116, 116, 115, 111, 109, 109, 111, 115, 113, 110, 108, 104, 102, 105, 101, 110, 108, 101, 99, 100, 98, 100, 100, 100, 100, 97, 93, 96, 90, 93, 95, 89, 90, 92, 90, 85, 80, 87, 91, 90, 82, 84, 80, 76, 83, 80, 80, 80, 70, 69, 74, 65, 69, 73, 69, 64, 66, 66, 63, 66, 69, 68, 60, 60, 65, 61, 56, 60, 63, 60, 56, 30, 34, 32, 34, 34, 32, 35, 37, 35, 40, 37, 40, 39, 41, 40, 40, 42, 45, 46, 44, 46, 50, 52, 62, 50, 50, 53, 54, 57, 58, 56, 58, 57, 58, 61, 58, 63, 61, 62, 62, 66, 65, 70, 72, 69, 71, 67, 71, 76, 72, 74, 70, 80, 75, 82, 81, 80, 81, 80, 80, 82, 86, 86, 91, 87, 89, 90, 87, 87, 89, 90, 86, 92, 92, 92, 94, 91, 98, 98, 101, 97, 97, 93, 102, 99, 98, 99, 101, 102, 97, 101, 104, 103, 107, 107, 110, 112, 113, 110, 111, 111, 110, 115, 109, 116, 117, 118, 117, 118, 121, 122, 121, 112, 15, 45, 21, 28, 38, 27, 2, 85, 127, 123, 128, 126, 126, 124, 124, 131, 127, 128, 149, 80, 73, 68, 102, 126, 123, 120, 94, 86, 91, 89, 89, 128, 127, 128, 132, 129, 127, 124, 123, 130, 126, 114, 19, 84, 101, 108, 76, 35, 32, 117, 122, 126, 121, 125, 121, 123, 124, 125, 124, 119, 118, 120, 121, 121, 118, 118, 119, 122, 127, 123, 119, 118, 117, 117, 121, 115, 107, 106, 112, 110, 110, 111, 109, 108, 104, 107, 104, 106, 104, 99, 99, 98, 95, 96, 100, 100, 95, 96, 89, 94, 88, 90, 89, 85, 89, 83, 88, 88, 78, 79, 86, 86, 83, 83, 83, 75, 79, 81, 79, 77, 69, 73, 73, 68, 68, 74, 77, 69, 64, 65, 65, 67, 69, 67, 64, 59, 61, 62, 58, 62, 63, 59, 52, 32, 33, 32, 30, 33, 36, 41, 41, 39, 39, 38, 42, 41, 37, 38, 39, 40, 45, 43, 42, 44, 52, 58, 60, 45, 50, 53, 54, 55, 55, 56, 61, 57, 59, 63, 62, 61, 58, 60, 61, 66, 64, 66, 70, 70, 75, 67, 68, 73, 71, 69, 73, 77, 73, 75, 75, 75, 74, 77, 79, 82, 85, 83, 87, 83, 86, 87, 87, 88, 89, 91, 89, 92, 89, 90, 93, 92, 96, 94, 100, 96, 100, 93, 101, 98, 99, 102, 97, 105, 101, 101, 105, 107, 109, 111, 113, 106, 107, 111, 114, 113, 113, 115, 111, 112, 118, 119, 119, 117, 116, 117, 119, 103, 14, 33, 8, 7, 15, 2, 60, 130, 122, 123, 122, 124, 121, 125, 129, 128, 128, 105, 86, 80, 74, 106, 124, 121, 119, 90, 87, 91, 91, 86, 124, 126, 129, 129, 126, 126, 125, 120, 129, 126, 85, 13, 49, 40, 41, 31, 33, 9, 107, 121, 124, 122, 123, 120, 122, 124, 124, 124, 120, 121, 123, 119, 119, 114, 112, 110, 115, 116, 117, 117, 115, 118, 118, 120, 115, 110, 109, 113, 108, 112, 111, 109, 111, 105, 106, 104, 102, 99, 102, 101, 97, 98, 97, 99, 101, 96, 93, 91, 96, 88, 87, 83, 84, 88, 83, 87, 86, 79, 77, 80, 78, 82, 83, 76, 76, 77, 72, 77, 76, 74, 73, 70, 72, 68, 71, 77, 73, 66, 63, 66, 64, 67, 68, 68, 59, 56, 59, 55, 58, 60, 62, 57, 31, 28, 35, 32, 32, 40, 42, 37, 40, 38, 38, 37, 38, 35, 37, 38, 38, 44, 42, 46, 48, 47, 51, 52, 44, 51, 54, 52, 52, 58, 56, 57, 56, 59, 62, 63, 63, 61, 67, 63, 63, 62, 62, 71, 73, 70, 67, 65, 70, 69, 67, 75, 76, 73, 72, 76, 76, 73, 79, 80, 80, 82, 84, 83, 83, 84, 85, 88, 89, 88, 90, 92, 91, 89, 91, 91, 90, 95, 93, 95, 93, 98, 96, 98, 99, 102, 104, 100, 106, 106, 100, 101, 107, 107, 110, 111, 103, 106, 111, 114, 114, 112, 112, 114, 112, 117, 115, 117, 117, 116, 116, 117, 88, 18, 33, 4, 15, 1, 16, 15, 36, 126, 119, 125, 127, 124, 123, 126, 125, 126, 125, 109, 82, 81, 74, 107, 122, 120, 118, 92, 97, 99, 96, 81, 122, 126, 129, 128, 122, 123, 125, 120, 126, 125, 57, 15, 23, 7, 7, 5, 19, 9, 98, 120, 126, 125, 119, 121, 120, 122, 126, 122, 118, 120, 122, 121, 122, 116, 108, 109, 108, 107, 115, 111, 113, 113, 116, 115, 109, 107, 106, 109, 109, 109, 108, 104, 106, 107, 106, 105, 104, 101, 107, 103, 95, 99, 101, 96, 97, 103, 96, 92, 94, 87, 88, 88, 87, 85, 88, 84, 83, 79, 74, 78, 77, 76, 84, 78, 72, 78, 73, 76, 70, 75, 76, 71, 73, 70, 70, 68, 67, 68, 69, 69, 66, 64, 68, 69, 61, 53, 52, 53, 60, 59, 66, 65, 27, 30, 37, 34, 34, 37, 35, 30, 34, 39, 39, 39, 40, 36, 37, 38, 40, 44, 42, 52, 47, 43, 45, 49, 46, 52, 53, 52, 52, 52, 52, 52, 55, 61, 66, 60, 62, 63, 68, 63, 63, 65, 59, 67, 69, 64, 66, 71, 69, 70, 73, 75, 76, 78, 77, 81, 81, 80, 84, 84, 80, 81, 86, 85, 90, 86, 86, 87, 87, 89, 95, 94, 88, 92, 94, 89, 90, 92, 95, 92, 92, 92, 95, 97, 96, 95, 100, 100, 102, 103, 99, 102, 105, 104, 106, 111, 107, 109, 109, 110, 109, 112, 112, 111, 111, 116, 117, 118, 118, 115, 119, 115, 74, 25, 33, 13, 10, 4, 4, 7, 34, 125, 119, 120, 122, 124, 125, 125, 120, 121, 122, 100, 81, 74, 70, 106, 127, 122, 118, 91, 88, 83, 86, 82, 123, 126, 129, 127, 123, 121, 125, 127, 128, 123, 43, 25, 23, 1, 6, 1, 16, 20, 72, 123, 124, 122, 117, 116, 119, 121, 123, 120, 119, 123, 118, 120, 119, 115, 114, 111, 111, 108, 112, 109, 107, 108, 111, 111, 106, 108, 110, 110, 111, 111, 108, 103, 105, 108, 105, 105, 106, 106, 107, 102, 96, 96, 100, 97, 96, 101, 96, 97, 94, 87, 87, 87, 88, 83, 85, 81, 83, 81, 76, 73, 76, 74, 73, 78, 74, 74, 74, 76, 76, 75, 73, 70, 71, 73, 72, 73, 72, 64, 62, 65, 66, 63, 66, 65, 63, 57, 57, 59, 61, 58, 58, 63, 25, 34, 35, 32, 32, 32, 29, 26, 34, 41, 40, 39, 41, 41, 38, 40, 42, 44, 42, 46, 43, 44, 50, 51, 48, 51, 52, 54, 53, 49, 60, 56, 55, 60, 65, 55, 61, 65, 59, 58, 60, 65, 58, 67, 71, 69, 70, 72, 72, 71, 71, 76, 77, 82, 81, 80, 82, 80, 83, 85, 83, 82, 87, 87, 93, 86, 89, 84, 86, 91, 97, 93, 88, 90, 91, 90, 93, 93, 91, 90, 95, 94, 98, 99, 97, 94, 99, 99, 103, 102, 101, 97, 99, 99, 102, 109, 107, 108, 100, 106, 104, 107, 112, 111, 113, 114, 115, 119, 120, 118, 114, 121, 60, 30, 26, 4, 9, 31, 17, 119, 120, 119, 123, 122, 124, 125, 121, 121, 124, 113, 79, 81, 71, 102, 124, 122, 119, 89, 87, 83, 83, 84, 122, 127, 130, 123, 120, 121, 127, 129, 126, 113, 18, 55, 27, 2, 6, 13, 27, 58, 124, 119, 118, 118, 112, 118, 121, 119, 118, 121, 121, 118, 120, 113, 114, 117, 110, 115, 114, 110, 113, 108, 112, 114, 114, 110, 108, 108, 105, 108, 109, 104, 100, 103, 104, 104, 102, 102, 103, 101, 100, 98, 97, 96, 100, 94, 92, 92, 92, 92, 91, 91, 91, 87, 84, 84, 84, 78, 84, 82, 76, 74, 70, 72, 74, 71, 73, 73, 76, 78, 74, 70, 74, 76, 72, 69, 71, 69, 66, 63, 64, 63, 64, 64, 61, 63, 59, 60, 60, 62, 65, 55, 61, 29, 33, 35, 33, 32, 32, 27, 28, 37, 38, 40, 40, 39, 40, 35, 36, 38, 39, 43, 44, 44, 45, 48, 48, 47, 51, 48, 53, 53, 51, 60, 55, 59, 64, 62, 56, 61, 62, 57, 61, 58, 62, 62, 65, 70, 70, 72, 76, 70, 72, 74, 73, 73, 79, 76, 75, 75, 78, 79, 84, 86, 80, 83, 86, 84, 83, 88, 88, 86, 88, 90, 88, 93, 89, 88, 92, 91, 92, 90, 91, 95, 100, 100, 96, 100, 100, 100, 99, 104, 103, 104, 95, 95, 99, 102, 105, 101, 111, 101, 107, 108, 112, 112, 109, 111, 115, 116, 117, 120, 119, 112, 118, 60, 19, 21, 3, 15, 54, 22, 130, 130, 121, 122, 125, 125, 121, 124, 122, 124, 165, 83, 81, 68, 98, 118, 119, 115, 93, 87, 85, 82, 77, 117, 121, 122, 121, 120, 123, 122, 123, 125, 112, 7, 52, 18, 7, 1, 3, 19, 33, 59, 129, 119, 120, 120, 111, 119, 119, 117, 117, 118, 122, 111, 118, 112, 120, 112, 109, 112, 116, 108, 111, 109, 113, 113, 117, 112, 110, 107, 109, 109, 110, 101, 97, 101, 104, 104, 103, 101, 100, 100, 96, 96, 97, 95, 97, 90, 91, 97, 94, 92, 93, 86, 87, 89, 84, 85, 85, 77, 86, 82, 82, 75, 73, 70, 73, 73, 73, 70, 71, 69, 68, 68, 70, 74, 71, 71, 70, 71, 69, 65, 67, 67, 66, 66, 63, 61, 57, 57, 56, 60, 60, 57, 58, 29, 35, 35, 31, 30, 31, 31, 36, 40, 39, 38, 35, 37, 36, 36, 39, 38, 38, 43, 42, 45, 47, 42, 46, 46, 49, 48, 51, 51, 56, 56, 58, 59, 65, 64, 60, 61, 62, 63, 63, 63, 65, 62, 69, 69, 71, 69, 73, 67, 76, 76, 77, 76, 84, 80, 82, 81, 82, 80, 84, 82, 80, 85, 84, 83, 84, 87, 92, 88, 86, 88, 88, 91, 86, 90, 92, 86, 92, 88, 89, 93, 98, 95, 95, 97, 99, 100, 102, 101, 102, 104, 94, 93, 98, 101, 102, 95, 107, 102, 107, 117, 119, 117, 112, 113, 117, 115, 118, 119, 116, 119, 131, 91, 5, 7, 5, 1, 4, 11, 32, 34, 180, 165, 135, 131, 125, 122, 122, 123, 124, 124, 131, 86, 86, 72, 98, 120, 118, 119, 90, 84, 83, 81, 78, 116, 121, 117, 125, 121, 122, 122, 117, 119, 127, 16, 49, 7, 6, 2, 5, 18, 26, 62, 130, 114, 121, 118, 114, 117, 113, 110, 113, 113, 123, 115, 120, 119, 121, 110, 113, 112, 117, 111, 109, 109, 109, 111, 112, 109, 106, 109, 109, 108, 111, 104, 97, 102, 101, 103, 103, 97, 97, 98, 98, 94, 91, 95, 96, 92, 90, 94, 95, 94, 94, 87, 87, 87, 84, 90, 88, 83, 87, 83, 83, 74, 75, 70, 72, 74, 75, 70, 68, 66, 65, 68, 67, 70, 68, 69, 68, 74, 70, 64, 68, 64, 66, 68, 67, 65, 61, 58, 58, 57, 57, 56, 58, 30, 34, 35, 30, 30, 31, 34, 41, 35, 36, 39, 34, 38, 36, 41, 41, 37, 39, 44, 44, 44, 47, 45, 49, 45, 46, 47, 52, 53, 56, 58, 60, 58, 65, 65, 58, 59, 63, 63, 65, 67, 67, 61, 67, 69, 71, 73, 69, 67, 73, 73, 79, 80, 85, 82, 85, 82, 81, 79, 83, 80, 81, 86, 83, 84, 83, 85, 86, 87, 86, 87, 83, 85, 90, 93, 87, 84, 91, 86, 92, 96, 97, 93, 95, 92, 97, 102, 100, 97, 101, 98, 94, 94, 99, 103, 102, 112, 107, 129, 179, 155, 118, 83, 101, 110, 112, 113, 118, 115, 113, 118, 137, 139, 29, 2, 3, 3, 3, 6, 26, 72, 164, 160, 138, 117, 122, 119, 122, 120, 121, 123, 82, 88, 81, 73, 97, 120, 114, 119, 91, 85, 88, 87, 75, 117, 120, 118, 121, 121, 120, 120, 118, 122, 150, 24, 13, 3, 1, 1, 12, 13, 10, 7, 77, 148, 122, 118, 117, 109, 111, 111, 114, 114, 113, 112, 123, 117, 125, 116, 111, 115, 113, 116, 110, 108, 111, 108, 112, 112, 108, 105, 109, 107, 104, 105, 102, 98, 103, 101, 102, 103, 97, 94, 97, 100, 96, 90, 95, 91, 90, 90, 92, 89, 95, 96, 90, 89, 86, 84, 85, 87, 89, 85, 82, 83, 77, 74, 70, 74, 73, 76, 70, 69, 69, 69, 70, 71, 72, 70, 68, 68, 67, 69, 65, 61, 64, 63, 66, 67, 65, 63, 56, 59, 57, 54, 54, 58, 34, 31, 29, 31, 33, 27, 31, 36, 30, 33, 41, 34, 41, 41, 43, 45, 47, 50, 47, 45, 45, 44, 47, 47, 41, 45, 50, 53, 54, 55, 57, 58, 60, 65, 65, 62, 62, 61, 61, 64, 62, 68, 67, 73, 72, 71, 80, 76, 69, 68, 73, 79, 80, 81, 86, 80, 77, 83, 80, 80, 78, 82, 84, 82, 83, 83, 85, 87, 90, 90, 86, 81, 87, 92, 90, 84, 88, 89, 87, 86, 93, 93, 95, 96, 92, 89, 99, 97, 100, 103, 94, 92, 95, 104, 107, 103, 109, 89, 56, 34, 27, 16, 4, 57, 103, 111, 111, 116, 111, 110, 118, 100, 140, 139, 57, 8, 17, 2, 47, 96, 159, 140, 104, 124, 120, 119, 116, 118, 118, 116, 120, 61, 69, 82, 75, 97, 122, 116, 122, 95, 94, 101, 98, 78, 113, 119, 119, 115, 119, 112, 116, 112, 192, 174, 54, 21, 6, 13, 10, 4, 2, 111, 187, 143, 115, 121, 116, 118, 118, 116, 121, 120, 110, 118, 109, 121, 114, 117, 113, 112, 113, 114, 111, 108, 103, 109, 118, 109, 109, 107, 107, 105, 103, 102, 104, 103, 102, 100, 99, 99, 95, 96, 100, 97, 91, 93, 92, 90, 86, 96, 89, 88, 85, 86, 86, 88, 85, 86, 89, 87, 83, 80, 82, 82, 81, 78, 80, 73, 74, 71, 68, 67, 69, 69, 72, 73, 74, 69, 68, 67, 71, 66, 58, 67, 65, 65, 62, 59, 61, 55, 59, 56, 57, 55, 56, 33, 32, 32, 30, 30, 24, 29, 36, 37, 40, 44, 37, 41, 44, 43, 48, 51, 47, 42, 42, 48, 46, 45, 46, 48, 49, 54, 55, 58, 53, 56, 57, 63, 62, 66, 68, 63, 59, 57, 59, 65, 73, 70, 75, 71, 73, 74, 72, 73, 70, 76, 76, 77, 78, 83, 73, 80, 79, 80, 79, 78, 81, 80, 80, 83, 84, 89, 95, 92, 92, 86, 86, 92, 86, 91, 91, 90, 90, 90, 88, 95, 95, 94, 89, 92, 88, 97, 96, 100, 99, 98, 98, 101, 108, 106, 103, 107, 61, 8, 7, 9, 13, 13, 25, 105, 108, 107, 109, 112, 110, 133, 132, 128, 215, 196, 178, 158, 142, 188, 196, 150, 100, 123, 128, 123, 118, 118, 116, 115, 115, 117, 52, 63, 79, 69, 91, 117, 115, 116, 88, 87, 86, 80, 71, 110, 120, 120, 118, 121, 123, 113, 113, 176, 139, 120, 109, 27, 28, 15, 25, 44, 101, 145, 142, 162, 122, 122, 111, 113, 118, 115, 112, 111, 119, 122, 133, 127, 107, 115, 110, 113, 114, 110, 109, 107, 108, 113, 117, 108, 108, 103, 105, 103, 100, 99, 101, 96, 102, 100, 97, 99, 98, 99, 98, 93, 92, 94, 91, 90, 88, 93, 97, 90, 87, 90, 85, 84, 89, 86, 84, 80, 81, 78, 77, 78, 79, 75, 77, 77, 77, 72, 71, 72, 71, 66, 64, 69, 74, 69, 68, 67, 70, 67, 60, 61, 61, 65, 61, 57, 64, 58, 56, 57, 57, 60, 59, 33, 34, 33, 30, 29, 28, 31, 32, 40, 40, 40, 36, 37, 43, 45, 46, 45, 41, 43, 43, 48, 49, 43, 46, 47, 48, 53, 56, 64, 57, 58, 60, 59, 63, 70, 69, 64, 61, 57, 58, 70, 72, 68, 71, 69, 69, 69, 68, 70, 70, 72, 73, 78, 83, 78, 75, 80, 78, 80, 76, 80, 81, 84, 84, 85, 85, 87, 86, 85, 91, 89, 88, 93, 88, 89, 88, 90, 86, 88, 89, 95, 93, 88, 92, 98, 97, 97, 96, 100, 98, 97, 98, 102, 104, 102, 103, 99, 15, 46, 40, 55, 81, 72, 12, 90, 110, 106, 109, 113, 112, 115, 176, 155, 133, 169, 172, 173, 156, 137, 140, 146, 186, 154, 118, 119, 114, 119, 117, 118, 121, 111, 52, 65, 83, 71, 89, 115, 118, 114, 84, 78, 74, 73, 66, 112, 118, 119, 117, 119, 116, 114, 113, 139, 103, 144, 137, 155, 129, 113, 175, 168, 194, 170, 114, 155, 124, 124, 112, 116, 115, 107, 102, 62, 65, 85, 115, 130, 98, 114, 107, 116, 119, 115, 111, 111, 110, 111, 111, 107, 105, 105, 105, 104, 100, 100, 98, 98, 99, 97, 97, 102, 101, 102, 103, 96, 97, 96, 93, 91, 91, 88, 91, 89, 88, 87, 83, 88, 90, 84, 88, 86, 80, 79, 76, 75, 81, 81, 76, 78, 77, 76, 75, 75, 73, 68, 61, 66, 65, 65, 70, 66, 69, 64, 61, 61, 58, 63, 63, 60, 63, 62, 61, 62, 55, 64, 64, 29, 33, 29, 29, 30, 31, 35, 31, 44, 41, 37, 35, 34, 42, 44, 43, 42, 43, 46, 48, 48, 48, 45, 45, 47, 52, 56, 57, 63, 63, 59, 58, 56, 64, 66, 65, 64, 59, 56, 58, 69, 67, 68, 74, 71, 68, 68, 68, 69, 70, 70, 73, 76, 73, 76, 82, 73, 76, 78, 77, 80, 82, 86, 82, 85, 86, 88, 88, 86, 89, 90, 89, 88, 84, 87, 87, 90, 93, 94, 91, 91, 94, 93, 95, 96, 94, 95, 96, 101, 96, 94, 93, 101, 101, 101, 103, 100, 14, 64, 9, 3, 13, 10, 21, 14, 71, 110, 108, 112, 111, 111, 114, 163, 142, 154, 198, 129, 134, 129, 129, 140, 143, 171, 194, 131, 115, 117, 121, 118, 119, 121, 115, 50, 65, 80, 71, 88, 113, 115, 111, 82, 76, 75, 76, 67, 114, 120, 119, 117, 119, 115, 118, 121, 137, 121, 122, 115, 145, 149, 160, 178, 156, 146, 116, 154, 139, 112, 123, 108, 115, 114, 116, 78, 3, 2, 13, 10, 5, 20, 62, 105, 110, 113, 112, 113, 110, 111, 110, 112, 108, 108, 104, 105, 105, 104, 102, 103, 100, 103, 100, 97, 96, 95, 101, 102, 99, 99, 97, 97, 97, 96, 92, 89, 89, 91, 88, 88, 89, 89, 86, 86, 87, 86, 82, 81, 77, 70, 77, 79, 73, 77, 74, 73, 71, 71, 73, 68, 67, 67, 62, 63, 71, 67, 68, 62, 61, 64, 62, 61, 62, 63, 61, 60, 58, 59, 57, 59, 60, 26, 29, 27, 30, 31, 35, 38, 31, 41, 42, 37, 40, 36, 42, 40, 40, 42, 39, 45, 42, 46, 46, 46, 47, 46, 50, 53, 57, 56, 61, 58, 55, 59, 62, 57, 59, 57, 55, 56, 57, 61, 64, 68, 67, 70, 71, 65, 71, 72, 74, 76, 77, 71, 69, 74, 79, 73, 76, 79, 78, 80, 82, 80, 79, 84, 85, 89, 86, 87, 89, 88, 84, 86, 86, 86, 84, 87, 91, 92, 95, 96, 96, 98, 101, 97, 94, 95, 99, 97, 95, 96, 97, 101, 104, 103, 102, 93, 15, 56, 9, 1, 2, 15, 16, 45, 113, 111, 114, 107, 109, 129, 211, 122, 157, 180, 146, 155, 161, 158, 138, 112, 113, 222, 161, 112, 115, 120, 119, 118, 115, 113, 54, 62, 76, 73, 91, 112, 111, 111, 85, 77, 73, 76, 70, 111, 117, 115, 118, 117, 112, 115, 118, 115, 158, 185, 131, 118, 110, 139, 135, 142, 176, 148, 184, 135, 111, 112, 103, 111, 115, 120, 49, 70, 81, 54, 39, 29, 28, 89, 116, 114, 106, 112, 110, 109, 106, 106, 107, 109, 105, 104, 104, 105, 107, 103, 101, 102, 101, 100, 97, 94, 95, 101, 100, 102, 93, 95, 96, 95, 95, 95, 91, 88, 86, 91, 93, 92, 86, 85, 86, 86, 81, 78, 79, 74, 76, 78, 73, 73, 73, 72, 68, 68, 72, 67, 67, 66, 68, 63, 72, 64, 65, 64, 62, 65, 67, 62, 61, 64, 61, 57, 58, 60, 57, 56, 57, 27, 27, 29, 34, 34, 33, 35, 33, 38, 40, 37, 43, 34, 40, 41, 41, 45, 39, 43, 38, 40, 44, 42, 51, 51, 46, 45, 51, 48, 53, 51, 48, 57, 58, 53, 58, 53, 55, 61, 60, 57, 60, 58, 63, 67, 67, 64, 71, 74, 73, 79, 75, 71, 73, 74, 74, 72, 76, 83, 79, 77, 73, 71, 75, 81, 84, 88, 83, 84, 88, 83, 82, 85, 86, 85, 86, 89, 88, 87, 90, 94, 95, 94, 97, 94, 100, 96, 101, 99, 100, 99, 98, 98, 103, 103, 100, 79, 17, 66, 2, 2, 26, 7, 21, 111, 111, 114, 105, 111, 177, 249, 208, 138, 138, 140, 148, 142, 120, 99, 111, 130, 165, 146, 113, 113, 116, 116, 119, 116, 111, 57, 59, 74, 72, 90, 111, 111, 111, 83, 76, 73, 76, 73, 106, 113, 115, 117, 116, 117, 106, 111, 157, 182, 141, 131, 132, 134, 130, 130, 144, 183, 155, 146, 172, 116, 112, 107, 104, 107, 116, 28, 45, 44, 37, 23, 18, 18, 84, 106, 104, 107, 110, 108, 106, 107, 105, 105, 102, 99, 103, 106, 106, 101, 95, 98, 100, 100, 99, 98, 98, 95, 99, 100, 101, 96, 92, 93, 92, 98, 93, 92, 93, 90, 93, 94, 92, 89, 86, 90, 88, 81, 78, 77, 76, 76, 79, 75, 69, 70, 79, 69, 69, 72, 68, 67, 69, 71, 65, 70, 64, 63, 67, 60, 66, 66, 62, 62, 62, 61, 57, 59, 60, 55, 56, 60, 28, 30, 31, 32, 36, 36, 34, 35, 35, 39, 47, 38, 37, 35, 41, 42, 38, 37, 36, 44, 38, 42, 43, 50, 41, 44, 47, 47, 47, 50, 49, 51, 53, 59, 54, 56, 53, 59, 56, 58, 55, 58, 53, 64, 60, 62, 65, 64, 64, 67, 74, 65, 74, 66, 72, 74, 73, 78, 81, 77, 74, 72, 71, 72, 77, 86, 86, 79, 82, 81, 79, 82, 90, 88, 86, 86, 85, 87, 88, 90, 93, 91, 90, 94, 95, 99, 98, 98, 98, 100, 101, 102, 103, 103, 107, 101, 60, 22, 62, 13, 10, 1, 28, 40, 2, 98, 104, 108, 110, 113, 156, 226, 239, 205, 131, 135, 127, 127, 123, 116, 140, 158, 170, 124, 106, 113, 118, 113, 117, 114, 105, 54, 59, 78, 71, 90, 112, 111, 109, 82, 77, 72, 71, 67, 105, 114, 116, 114, 118, 111, 108, 119, 228, 179, 93, 113, 133, 161, 164, 170, 167, 149, 116, 166, 234, 118, 115, 109, 106, 106, 96, 16, 27, 2, 3, 3, 14, 17, 57, 114, 102, 101, 110, 113, 108, 99, 98, 99, 99, 100, 104, 104, 100, 99, 98, 97, 97, 95, 98, 98, 99, 97, 97, 102, 103, 99, 92, 89, 95, 100, 87, 92, 94, 93, 92, 85, 89, 86, 78, 86, 87, 82, 81, 77, 79, 77, 73, 76, 72, 73, 77, 71, 71, 73, 68, 71, 73, 68, 69, 71, 67, 64, 72, 60, 68, 69, 65, 62, 60, 60, 59, 58, 59, 53, 61, 66, 29, 26, 26, 28, 35, 37, 31, 36, 37, 38, 45, 35, 35, 34, 39, 39, 39, 39, 41, 44, 39, 42, 43, 44, 42, 48, 51, 48, 47, 50, 54, 54, 52, 59, 54, 50, 49, 56, 57, 60, 57, 59, 55, 61, 60, 59, 59, 60, 59, 65, 69, 64, 71, 70, 73, 70, 66, 73, 75, 74, 71, 76, 73, 72, 77, 84, 81, 72, 79, 77, 78, 81, 86, 87, 86, 87, 87, 88, 91, 96, 96, 89, 92, 92, 94, 93, 98, 100, 97, 100, 100, 96, 93, 99, 102, 104, 63, 15, 49, 2, 5, 7, 6, 50, 7, 92, 104, 105, 109, 109, 115, 156, 155, 239, 152, 126, 117, 116, 125, 119, 105, 95, 182, 137, 108, 107, 113, 109, 108, 105, 103, 55, 61, 80, 73, 90, 115, 109, 108, 83, 76, 69, 68, 66, 109, 112, 112, 111, 119, 104, 107, 119, 149, 147, 126, 109, 120, 119, 149, 147, 143, 126, 170, 237, 239, 135, 103, 98, 111, 107, 92, 13, 10, 15, 1, 4, 5, 1, 23, 37, 109, 107, 110, 107, 105, 101, 96, 104, 98, 98, 98, 101, 102, 96, 99, 101, 96, 97, 94, 98, 98, 100, 100, 98, 101, 99, 97, 99, 90, 95, 95, 91, 92, 89, 92, 91, 81, 84, 86, 84, 84, 86, 77, 81, 79, 77, 77, 72, 75, 72, 71, 72, 73, 73, 70, 72, 70, 68, 68, 70, 70, 69, 67, 71, 60, 66, 70, 68, 61, 64, 64, 59, 57, 58, 55, 57, 58, 27, 26, 26, 28, 29, 32, 30, 38, 36, 34, 34, 37, 33, 38, 37, 34, 39, 35, 39, 44, 41, 39, 42, 48, 45, 46, 51, 49, 48, 54, 53, 50, 52, 54, 52, 50, 49, 54, 58, 58, 57, 58, 57, 58, 58, 58, 61, 60, 60, 67, 68, 68, 64, 63, 69, 74, 67, 71, 73, 71, 67, 75, 72, 76, 76, 77, 72, 69, 79, 76, 78, 79, 81, 84, 82, 82, 87, 87, 91, 95, 94, 92, 95, 91, 94, 92, 98, 99, 99, 94, 96, 93, 93, 97, 100, 103, 69, 19, 42, 3, 4, 8, 5, 23, 18, 110, 118, 103, 111, 107, 109, 185, 166, 206, 154, 121, 114, 102, 100, 96, 120, 170, 162, 115, 110, 106, 107, 106, 107, 104, 103, 57, 59, 75, 73, 90, 113, 104, 107, 82, 77, 74, 71, 65, 108, 110, 112, 111, 113, 108, 111, 114, 127, 159, 112, 121, 122, 117, 111, 123, 132, 148, 228, 178, 186, 124, 107, 113, 106, 103, 65, 16, 6, 2, 4, 7, 2, 24, 25, 105, 112, 110, 107, 100, 98, 98, 99, 101, 98, 95, 97, 101, 97, 99, 102, 96, 95, 98, 99, 98, 98, 95, 97, 100, 94, 95, 98, 94, 95, 90, 89, 86, 91, 94, 87, 83, 85, 84, 79, 79, 81, 77, 82, 81, 72, 74, 74, 75, 72, 73, 78, 73, 73, 69, 66, 69, 64, 69, 67, 64, 70, 67, 66, 62, 64, 69, 65, 58, 64, 64, 60, 57, 59, 59, 60, 59, 25, 29, 27, 26, 27, 31, 30, 37, 36, 37, 34, 35, 35, 37, 38, 39, 36, 38, 38, 41, 41, 40, 44, 48, 40, 43, 47, 48, 46, 53, 50, 53, 51, 49, 54, 50, 52, 51, 54, 53, 57, 59, 61, 59, 59, 59, 63, 60, 62, 65, 65, 66, 66, 67, 68, 72, 66, 67, 73, 68, 67, 81, 70, 75, 71, 73, 66, 72, 78, 75, 73, 76, 81, 77, 76, 76, 81, 82, 87, 89, 88, 90, 90, 90, 90, 91, 94, 97, 98, 90, 95, 99, 95, 94, 94, 115, 102, 7, 7, 6, 9, 2, 2, 9, 31, 156, 175, 115, 107, 107, 100, 160, 174, 186, 166, 120, 125, 103, 115, 115, 131, 189, 189, 120, 111, 106, 107, 105, 107, 108, 104, 58, 56, 72, 68, 88, 109, 102, 107, 83, 78, 74, 70, 64, 105, 112, 110, 111, 111, 107, 115, 112, 151, 166, 109, 103, 106, 116, 110, 119, 127, 168, 213, 137, 155, 111, 105, 103, 98, 102, 47, 25, 23, 3, 3, 9, 24, 17, 103, 106, 107, 101, 99, 98, 98, 101, 99, 100, 97, 96, 100, 98, 102, 101, 96, 94, 99, 99, 99, 97, 92, 94, 98, 93, 92, 97, 97, 93, 93, 85, 86, 87, 93, 86, 81, 83, 83, 79, 86, 84, 80, 82, 77, 69, 74, 74, 75, 73, 73, 73, 75, 70, 66, 63, 69, 63, 68, 67, 61, 70, 64, 61, 67, 64, 64, 63, 59, 60, 60, 58, 57, 58, 57, 56, 59, 26, 30, 32, 30, 29, 31, 32, 33, 36, 39, 39, 35, 32, 36, 36, 41, 33, 37, 42, 41, 41, 43, 48, 46, 46, 46, 45, 48, 49, 48, 50, 53, 51, 51, 54, 52, 52, 53, 56, 60, 62, 61, 61, 60, 60, 63, 59, 60, 58, 61, 62, 63, 65, 69, 66, 67, 66, 65, 71, 68, 68, 73, 67, 68, 68, 73, 67, 68, 69, 73, 75, 74, 76, 74, 75, 79, 78, 78, 81, 85, 86, 88, 82, 87, 119, 128, 104, 86, 93, 90, 89, 96, 94, 91, 91, 134, 131, 55, 8, 8, 3, 28, 67, 111, 146, 183, 134, 103, 106, 105, 197, 146, 152, 165, 140, 147, 126, 135, 126, 99, 116, 224, 175, 109, 110, 109, 106, 106, 105, 105, 59, 53, 75, 62, 80, 103, 102, 105, 85, 73, 73, 74, 65, 101, 111, 106, 109, 109, 104, 109, 107, 117, 185, 194, 119, 97, 113, 104, 116, 119, 172, 163, 191, 148, 105, 99, 103, 114, 121, 50, 13, 13, 3, 4, 5, 17, 25, 138, 112, 96, 99, 97, 98, 101, 96, 99, 100, 98, 90, 95, 105, 95, 95, 91, 92, 101, 97, 100, 95, 95, 95, 96, 94, 92, 96, 97, 90, 89, 88, 91, 85, 89, 86, 82, 82, 86, 81, 79, 81, 84, 81, 79, 77, 78, 73, 75, 74, 74, 70, 74, 69, 69, 71, 68, 67, 68, 68, 65, 68, 64, 57, 66, 66, 60, 67, 65, 62, 60, 59, 57, 58, 58, 51, 61, 22, 32, 35, 30, 28, 33, 33, 32, 37, 37, 39, 36, 32, 34, 35, 38, 36, 36, 43, 44, 44, 45, 43, 43, 47, 47, 49, 49, 53, 51, 55, 53, 52, 52, 52, 52, 52, 55, 57, 60, 60, 61, 61, 56, 57, 61, 61, 58, 58, 60, 61, 62, 62, 66, 63, 63, 62, 65, 67, 61, 64, 68, 64, 69, 72, 72, 67, 65, 72, 76, 77, 70, 74, 76, 73, 79, 81, 77, 82, 86, 84, 79, 81, 90, 124, 108, 72, 23, 61, 96, 86, 88, 82, 87, 98, 173, 116, 138, 95, 63, 50, 82, 154, 196, 233, 164, 136, 125, 99, 107, 129, 242, 199, 108, 118, 137, 144, 132, 119, 87, 74, 113, 155, 144, 102, 107, 106, 105, 105, 102, 105, 62, 52, 78, 63, 77, 100, 98, 102, 83, 70, 72, 74, 63, 100, 109, 101, 107, 105, 101, 108, 106, 147, 200, 163, 109, 104, 136, 91, 105, 120, 183, 157, 162, 141, 105, 97, 104, 125, 133, 68, 1, 17, 1, 7, 12, 1, 4, 41, 167, 127, 99, 99, 95, 95, 99, 96, 105, 93, 95, 97, 97, 87, 96, 89, 94, 94, 96, 95, 92, 93, 92, 95, 96, 93, 92, 94, 93, 91, 89, 90, 88, 87, 89, 86, 86, 86, 83, 82, 75, 77, 83, 79, 80, 78, 78, 73, 72, 73, 71, 74, 70, 67, 74, 71, 69, 72, 70, 68, 67, 65, 63, 58, 70, 64, 58, 66, 64, 65, 59, 63, 62, 57, 59, 50, 59, 28, 32, 32, 28, 27, 32, 33, 33, 37, 37, 35, 37, 37, 34, 36, 35, 40, 39, 43, 48, 45, 46, 40, 40, 44, 48, 46, 46, 49, 54, 54, 49, 54, 54, 55, 54, 52, 56, 51, 56, 55, 55, 55, 54, 58, 58, 60, 52, 59, 55, 63, 66, 60, 66, 66, 65, 66, 65, 65, 61, 67, 71, 67, 71, 70, 70, 69, 66, 75, 76, 76, 77, 73, 74, 81, 79, 73, 75, 80, 86, 81, 81, 79, 23, 4, 2, 4, 7, 78, 91, 93, 84, 89, 86, 157, 97, 106, 146, 155, 171, 216, 234, 212, 136, 88, 185, 115, 93, 101, 162, 232, 253, 191, 109, 88, 80, 79, 81, 88, 91, 129, 165, 77, 99, 99, 101, 101, 101, 104, 105, 63, 51, 73, 65, 76, 102, 95, 99, 82, 72, 73, 74, 64, 96, 103, 102, 106, 105, 108, 109, 109, 235, 188, 76, 107, 139, 149, 149, 144, 161, 161, 123, 165, 220, 103, 95, 98, 110, 134, 78, 18, 1, 2, 3, 11, 72, 194, 151, 97, 95, 90, 89, 95, 90, 89, 85, 95, 120, 143, 94, 90, 100, 91, 85, 87, 98, 93, 94, 86, 90, 93, 93, 93, 92, 89, 94, 88, 89, 90, 89, 90, 87, 88, 91, 91, 84, 82, 77, 81, 77, 79, 75, 73, 73, 69, 71, 70, 71, 71, 69, 71, 71, 68, 67, 71, 69, 67, 67, 69, 63, 64, 57, 62, 64, 62, 65, 60, 61, 62, 60, 55, 56, 56, 31, 28, 33, 30, 27, 30, 34, 34, 33, 44, 40, 36, 33, 35, 38, 35, 41, 39, 42, 49, 44, 48, 46, 44, 48, 52, 44, 50, 51, 50, 48, 50, 55, 53, 54, 53, 52, 57, 52, 55, 58, 60, 53, 53, 59, 58, 60, 57, 57, 62, 64, 63, 65, 70, 69, 66, 68, 64, 65, 67, 68, 70, 67, 69, 68, 70, 71, 77, 75, 77, 71, 76, 74, 74, 78, 80, 82, 79, 82, 88, 84, 87, 57, 18, 6, 21, 24, 63, 9, 71, 91, 82, 88, 87, 84, 137, 130, 152, 131, 111, 107, 123, 115, 134, 149, 148, 137, 92, 88, 93, 92, 80, 159, 243, 148, 122, 112, 107, 118, 112, 84, 86, 129, 75, 97, 96, 102, 103, 105, 102, 99, 62, 52, 72, 63, 73, 101, 97, 100, 82, 69, 72, 69, 60, 96, 103, 104, 98, 100, 104, 104, 102, 159, 157, 100, 82, 92, 116, 141, 147, 128, 97, 142, 229, 241, 118, 97, 92, 119, 161, 146, 88, 48, 13, 13, 10, 6, 11, 68, 132, 132, 168, 110, 98, 89, 89, 97, 88, 81, 37, 39, 85, 118, 120, 82, 104, 91, 93, 95, 94, 92, 92, 89, 89, 91, 93, 89, 91, 90, 93, 81, 86, 93, 88, 86, 87, 88, 87, 92, 86, 82, 79, 80, 77, 78, 77, 74, 75, 69, 75, 74, 76, 70, 71, 76, 70, 65, 65, 70, 65, 70, 63, 66, 58, 61, 64, 59, 60, 58, 57, 56, 53, 56, 63, 54, 56, 55, 29, 30, 34, 31, 28, 31, 33, 33, 37, 45, 39, 37, 35, 34, 38, 38, 38, 40, 40, 45, 46, 48, 48, 45, 44, 46, 45, 50, 50, 48, 50, 57, 55, 55, 58, 58, 55, 57, 56, 55, 57, 60, 52, 56, 57, 62, 64, 61, 60, 64, 65, 64, 63, 69, 67, 66, 69, 66, 59, 65, 69, 71, 70, 72, 72, 68, 69, 72, 72, 77, 77, 75, 72, 73, 78, 83, 81, 79, 81, 84, 82, 83, 38, 31, 21, 34, 49, 55, 8, 49, 85, 76, 81, 84, 83, 118, 157, 183, 152, 135, 118, 101, 117, 171, 160, 155, 154, 119, 89, 87, 81, 55, 108, 200, 137, 104, 102, 103, 122, 90, 63, 60, 60, 65, 95, 92, 96, 95, 98, 98, 94, 64, 51, 71, 64, 74, 95, 96, 99, 79, 64, 71, 67, 58, 95, 100, 99, 95, 96, 94, 100, 97, 73, 179, 118, 100, 95, 88, 89, 103, 103, 130, 215, 211, 150, 107, 102, 94, 106, 165, 229, 200, 180, 121, 95, 84, 105, 119, 175, 178, 169, 104, 97, 87, 90, 96, 92, 56, 17, 5, 13, 7, 27, 49, 100, 92, 86, 91, 93, 91, 95, 86, 87, 90, 90, 91, 90, 89, 88, 80, 80, 88, 87, 85, 85, 86, 85, 85, 87, 81, 76, 77, 78, 78, 76, 74, 77, 72, 79, 77, 75, 72, 73, 74, 69, 67, 68, 66, 67, 70, 65, 66, 60, 58, 57, 55, 58, 59, 57, 56, 57, 56, 57, 50, 53, 55, 31, 33, 33, 28, 30, 34, 33, 34, 41, 44, 39, 35, 33, 33, 34, 37, 34, 42, 43, 44, 47, 48, 44, 43, 44, 45, 50, 51, 51, 49, 52, 57, 55, 57, 54, 57, 56, 57, 57, 59, 57, 54, 51, 62, 58, 64, 63, 58, 60, 63, 67, 67, 64, 65, 68, 73, 69, 70, 65, 68, 72, 67, 74, 74, 73, 64, 69, 72, 74, 72, 76, 71, 71, 73, 77, 78, 76, 75, 78, 79, 79, 81, 25, 45, 25, 3, 7, 4, 4, 36, 78, 73, 83, 82, 86, 187, 179, 149, 146, 153, 152, 160, 153, 133, 119, 122, 214, 184, 82, 87, 79, 62, 92, 102, 85, 94, 91, 91, 94, 63, 57, 57, 57, 65, 91, 91, 91, 91, 91, 91, 89, 63, 50, 71, 63, 75, 90, 94, 94, 77, 65, 71, 69, 58, 94, 98, 92, 91, 91, 92, 91, 85, 50, 109, 85, 95, 101, 109, 102, 111, 115, 171, 219, 107, 76, 92, 98, 90, 90, 153, 186, 190, 230, 211, 196, 168, 179, 162, 163, 154, 150, 90, 92, 87, 92, 94, 93, 22, 84, 64, 45, 17, 3, 25, 90, 84, 84, 88, 92, 88, 96, 88, 90, 90, 85, 88, 88, 86, 84, 83, 77, 86, 89, 84, 82, 85, 83, 82, 80, 80, 72, 75, 80, 78, 76, 70, 73, 71, 78, 79, 73, 72, 71, 71, 67, 69, 66, 65, 72, 67, 65, 65, 64, 63, 57, 60, 58, 60, 58, 57, 59, 55, 58, 54, 54, 57, 33, 33, 34, 27, 25, 33, 38, 38, 41, 42, 41, 36, 34, 34, 33, 37, 32, 42, 45, 47, 45, 46, 42, 42, 43, 45, 50, 52, 49, 49, 52, 59, 57, 57, 55, 57, 55, 56, 54, 56, 56, 57, 49, 61, 60, 63, 60, 60, 59, 64, 67, 65, 66, 67, 68, 73, 72, 71, 66, 69, 70, 67, 74, 68, 71, 65, 69, 66, 72, 71, 73, 73, 71, 73, 77, 75, 77, 75, 77, 75, 77, 78, 9, 45, 20, 1, 2, 6, 38, 11, 70, 74, 75, 80, 85, 219, 236, 187, 141, 133, 142, 149, 125, 105, 129, 196, 244, 175, 83, 91, 79, 66, 96, 83, 75, 94, 93, 86, 87, 59, 61, 57, 57, 61, 95, 90, 92, 93, 89, 85, 86, 61, 51, 73, 60, 74, 89, 93, 91, 80, 70, 72, 73, 58, 89, 97, 93, 89, 91, 94, 91, 82, 41, 57, 63, 71, 82, 105, 106, 100, 94, 129, 135, 79, 78, 91, 92, 88, 123, 209, 101, 133, 162, 155, 147, 132, 143, 181, 158, 124, 172, 84, 91, 84, 95, 94, 83, 9, 57, 53, 62, 25, 13, 10, 25, 84, 81, 83, 88, 85, 87, 89, 89, 87, 88, 87, 88, 86, 84, 80, 82, 80, 85, 88, 84, 83, 85, 78, 82, 82, 77, 77, 77, 77, 75, 75, 71, 72, 71, 77, 78, 72, 72, 71, 71, 67, 70, 68, 67, 68, 70, 67, 64, 64, 63, 65, 66, 59, 62, 64, 63, 63, 55, 59, 56, 55, 57, 26, 34, 32, 27, 26, 33, 35, 36, 38, 42, 41, 40, 37, 38, 40, 36, 42, 43, 42, 50, 44, 43, 43, 47, 46, 45, 50, 53, 57, 51, 52, 50, 53, 54, 53, 59, 57, 48, 59, 58, 57, 60, 55, 64, 56, 63, 64, 66, 57, 61, 68, 66, 62, 66, 70, 66, 63, 65, 64, 69, 69, 69, 73, 70, 63, 68, 74, 71, 71, 74, 73, 72, 69, 75, 62, 82, 73, 73, 76, 74, 76, 69, 13, 10, 41, 15, 4, 3, 64, 6, 69, 73, 76, 78, 81, 166, 242, 237, 185, 131, 125, 124, 130, 158, 190, 239, 184, 140, 82, 84, 75, 67, 90, 81, 76, 88, 92, 90, 86, 55, 53, 59, 56, 64, 88, 90, 94, 95, 89, 92, 83, 61, 53, 72, 63, 72, 87, 85, 85, 76, 65, 68, 69, 57, 85, 86, 93, 89, 88, 93, 94, 96, 56, 67, 63, 64, 70, 91, 98, 96, 93, 79, 87, 83, 77, 87, 91, 88, 150, 243, 129, 83, 126, 170, 193, 207, 213, 202, 140, 126, 227, 97, 90, 83, 79, 90, 64, 9, 20, 4, 8, 4, 14, 21, 71, 76, 77, 91, 81, 84, 83, 87, 79, 84, 86, 87, 88, 83, 82, 75, 88, 84, 85, 80, 86, 85, 82, 83, 79, 73, 80, 78, 75, 77, 76, 76, 78, 72, 70, 69, 75, 70, 70, 71, 69, 70, 69, 71, 69, 71, 65, 64, 64, 65, 67, 69, 62, 67, 68, 62, 59, 51, 54, 56, 58, 58, 31, 36, 38, 34, 33, 35, 38, 38, 35, 38, 35, 38, 39, 35, 39, 39, 44, 42, 40, 51, 43, 43, 44, 48, 45, 48, 52, 50, 50, 45, 57, 54, 56, 51, 47, 55, 57, 46, 54, 55, 56, 54, 57, 62, 62, 61, 66, 65, 60, 69, 66, 63, 58, 60, 69, 66, 61, 62, 64, 69, 68, 63, 67, 69, 71, 69, 72, 71, 67, 74, 66, 64, 64, 84, 68, 65, 63, 66, 64, 71, 68, 62, 12, 38, 28, 15, 1, 2, 36, 1, 52, 70, 73, 82, 83, 133, 217, 239, 154, 127, 122, 123, 125, 140, 123, 184, 166, 142, 81, 82, 79, 50, 89, 94, 71, 89, 86, 88, 86, 53, 54, 60, 60, 63, 90, 96, 94, 91, 91, 91, 80, 58, 45, 66, 62, 70, 88, 91, 86, 75, 66, 69, 67, 53, 86, 87, 92, 90, 88, 91, 88, 90, 59, 68, 62, 60, 64, 85, 95, 94, 90, 79, 85, 76, 58, 82, 92, 90, 137, 241, 160, 110, 94, 108, 137, 147, 146, 127, 114, 195, 245, 122, 82, 74, 77, 90, 50, 15, 25, 7, 2, 1, 16, 25, 60, 70, 74, 85, 81, 79, 76, 76, 74, 81, 75, 76, 72, 79, 76, 73, 87, 77, 76, 73, 77, 73, 82, 77, 73, 70, 73, 75, 74, 76, 73, 71, 72, 70, 71, 70, 68, 70, 71, 64, 72, 70, 73, 71, 67, 69, 68, 61, 62, 67, 67, 68, 65, 69, 62, 64, 60, 56, 55, 57, 61, 61, 33, 35, 37, 33, 38, 38, 36, 35, 37, 40, 33, 38, 39, 36, 39, 42, 40, 40, 42, 46, 41, 40, 43, 46, 44, 47, 46, 47, 47, 49, 56, 50, 55, 51, 52, 55, 60, 55, 52, 53, 55, 58, 56, 61, 57, 61, 60, 62, 60, 63, 61, 66, 68, 62, 68, 66, 62, 65, 65, 66, 67, 69, 71, 67, 73, 70, 75, 70, 66, 76, 65, 70, 68, 78, 67, 60, 67, 65, 67, 69, 61, 62, 7, 36, 9, 4, 6, 4, 16, 70, 71, 73, 75, 71, 126, 172, 187, 124, 113, 98, 106, 92, 95, 124, 178, 168, 101, 77, 82, 88, 54, 103, 114, 67, 86, 86, 85, 83, 54, 56, 59, 60, 62, 94, 95, 94, 90, 89, 85, 80, 58, 44, 61, 65, 70, 86, 91, 88, 75, 64, 63, 67, 55, 82, 91, 93, 90, 83, 90, 88, 88, 57, 64, 60, 59, 68, 90, 87, 84, 89, 78, 73, 80, 46, 82, 79, 87, 129, 210, 135, 131, 120, 140, 116, 111, 105, 119, 119, 211, 194, 106, 78, 83, 76, 85, 38, 13, 41, 3, 2, 15, 29, 47, 80, 77, 77, 75, 74, 80, 78, 75, 75, 71, 68, 71, 77, 70, 65, 73, 74, 72, 74, 76, 69, 75, 83, 78, 71, 70, 74, 70, 71, 76, 73, 68, 68, 68, 69, 68, 69, 66, 67, 66, 69, 69, 69, 68, 70, 66, 61, 59, 63, 61, 61, 61, 68, 65, 66, 60, 58, 57, 54, 58, 58, 32, 37, 34, 31, 38, 40, 38, 37, 40, 40, 37, 38, 37, 39, 33, 40, 41, 42, 40, 41, 41, 38, 42, 45, 44, 49, 49, 50, 49, 51, 53, 50, 54, 53, 54, 53, 56, 57, 51, 55, 55, 59, 62, 60, 58, 59, 60, 60, 66, 64, 65, 65, 67, 63, 66, 64, 58, 61, 63, 66, 68, 70, 73, 67, 65, 66, 67, 64, 60, 59, 59, 61, 64, 61, 59, 62, 65, 61, 66, 62, 69, 94, 19, 13, 6, 3, 1, 1, 1, 91, 124, 79, 70, 72, 91, 168, 194, 147, 140, 101, 117, 103, 132, 127, 164, 160, 131, 78, 77, 85, 59, 98, 109, 68, 80, 81, 82, 80, 53, 56, 60, 63, 61, 91, 91, 91, 87, 85, 82, 81, 61, 51, 65, 67, 72, 88, 82, 84, 75, 68, 68, 70, 58, 79, 85, 84, 85, 83, 86, 87, 88, 61, 67, 64, 60, 69, 87, 88, 82, 90, 76, 75, 91, 53, 85, 79, 82, 108, 196, 158, 127, 119, 121, 105, 109, 113, 128, 123, 159, 173, 95, 75, 82, 76, 81, 28, 25, 29, 2, 4, 11, 37, 31, 79, 80, 73, 71, 69, 74, 74, 70, 72, 74, 67, 70, 74, 73, 69, 73, 70, 69, 72, 75, 69, 76, 77, 73, 73, 71, 72, 70, 68, 77, 74, 67, 68, 67, 71, 71, 65, 65, 67, 65, 69, 62, 61, 64, 62, 60, 57, 56, 58, 59, 56, 59, 61, 55, 60, 60, 56, 58, 57, 57, 57, 34, 37, 37, 36, 36, 39, 39, 39, 38, 37, 36, 37, 37, 40, 34, 40, 41, 43, 43, 42, 42, 40, 42, 47, 47, 48, 45, 50, 51, 53, 52, 53, 51, 51, 54, 52, 50, 54, 54, 51, 54, 58, 61, 58, 61, 57, 59, 58, 63, 67, 68, 68, 67, 58, 65, 66, 58, 60, 65, 63, 64, 66, 68, 68, 64, 64, 65, 63, 54, 89, 90, 70, 50, 54, 59, 56, 55, 61, 62, 59, 88, 152, 37, 3, 4, 6, 2, 1, 27, 26, 114, 161, 121, 69, 73, 160, 202, 153, 145, 144, 133, 143, 123, 124, 111, 122, 207, 209, 87, 74, 81, 61, 90, 85, 70, 78, 77, 78, 78, 55, 57, 62, 61, 61, 90, 90, 88, 84, 83, 82, 82, 66, 53, 71, 70, 74, 84, 78, 78, 77, 68, 65, 67, 58, 78, 86, 85, 85, 85, 88, 85, 86, 61, 68, 66, 63, 72, 85, 86, 83, 85, 75, 81, 88, 64, 85, 78, 81, 93, 175, 200, 131, 123, 109, 99, 143, 102, 151, 141, 156, 154, 75, 76, 84, 76, 95, 28, 16, 1, 4, 5, 2, 5, 23, 47, 85, 70, 69, 70, 76, 69, 72, 67, 73, 79, 72, 62, 66, 72, 67, 76, 71, 69, 69, 72, 71, 76, 72, 73, 72, 66, 67, 70, 67, 74, 70, 66, 69, 66, 71, 65, 63, 61, 61, 63, 62, 61, 63, 64, 62, 62, 57, 59, 58, 60, 55, 54, 57, 56, 56, 53, 53, 54, 58, 55, 54, 34, 36, 38, 37, 33, 35, 35, 34, 33, 33, 32, 37, 40, 41, 40, 42, 45, 46, 42, 42, 42, 41, 43, 46, 48, 48, 46, 49, 50, 48, 46, 51, 50, 51, 46, 50, 49, 52, 50, 50, 57, 54, 56, 58, 59, 62, 59, 60, 59, 67, 62, 64, 60, 61, 67, 66, 58, 62, 66, 64, 66, 66, 62, 64, 60, 61, 64, 68, 86, 126, 70, 33, 22, 37, 65, 57, 63, 59, 60, 65, 116, 150, 94, 39, 13, 2, 6, 31, 94, 86, 146, 115, 141, 77, 79, 206, 245, 198, 116, 113, 127, 120, 108, 102, 114, 186, 238, 171, 79, 73, 75, 55, 89, 74, 70, 76, 78, 75, 75, 61, 60, 62, 57, 62, 92, 86, 84, 84, 81, 82, 82, 66, 50, 71, 69, 72, 76, 77, 77, 73, 67, 67, 68, 60, 79, 83, 80, 87, 87, 90, 85, 86, 59, 66, 65, 62, 71, 82, 89, 85, 79, 74, 80, 81, 64, 82, 80, 78, 134, 210, 138, 125, 141, 117, 95, 164, 90, 145, 145, 121, 164, 65, 78, 78, 86, 140, 49, 1, 1, 5, 5, 7, 5, 75, 113, 75, 67, 70, 74, 69, 71, 65, 70, 73, 59, 53, 63, 69, 62, 66, 67, 64, 63, 65, 70, 75, 72, 73, 72, 69, 63, 66, 65, 71, 68, 67, 66, 62, 63, 63, 66, 57, 65, 62, 59, 61, 61, 60, 57, 61, 58, 62, 58, 56, 53, 53, 56, 57, 55, 50, 53, 51, 52, 52, 52, 33, 39, 38, 33, 31, 33, 33, 32, 30, 30, 33, 40, 38, 40, 45, 43, 45, 44, 41, 43, 41, 41, 43, 45, 48, 43, 45, 49, 52, 50, 46, 48, 45, 47, 42, 48, 52, 55, 49, 52, 52, 56, 57, 52, 54, 58, 63, 56, 56, 62, 63, 60, 54, 60, 68, 63, 55, 62, 61, 57, 61, 61, 58, 59, 60, 61, 57, 43, 15, 14, 6, 7, 3, 18, 61, 56, 60, 57, 57, 60, 133, 110, 147, 144, 150, 73, 57, 77, 111, 156, 131, 131, 127, 68, 71, 125, 238, 246, 193, 115, 87, 95, 98, 139, 189, 248, 216, 52, 68, 79, 76, 51, 92, 76, 66, 74, 72, 71, 73, 59, 57, 62, 60, 64, 92, 84, 80, 78, 76, 79, 78, 62, 45, 65, 65, 67, 73, 72, 75, 73, 66, 67, 68, 62, 78, 80, 77, 88, 84, 92, 84, 86, 59, 69, 69, 65, 69, 78, 87, 77, 75, 77, 84, 78, 87, 79, 86, 83, 160, 238, 113, 85, 128, 138, 131, 143, 142, 160, 126, 133, 218, 77, 81, 76, 124, 165, 75, 20, 9, 3, 9, 7, 1, 12, 138, 169, 89, 66, 74, 69, 78, 75, 71, 66, 66, 67, 66, 65, 57, 62, 66, 60, 59, 62, 63, 69, 72, 66, 71, 70, 69, 64, 67, 67, 67, 65, 66, 62, 62, 61, 65, 62, 62, 66, 65, 60, 56, 56, 58, 55, 65, 61, 58, 55, 54, 55, 56, 53, 56, 59, 56, 49, 46, 48, 46, 47, 35, 32, 26, 30, 29, 32, 32, 30, 36, 36, 43, 39, 37, 36, 40, 41, 42, 41, 39, 40, 42, 44, 42, 45, 47, 44, 47, 50, 54, 50, 53, 46, 53, 53, 53, 51, 55, 58, 52, 49, 51, 54, 54, 49, 57, 55, 56, 59, 57, 58, 60, 59, 58, 57, 57, 58, 59, 61, 58, 55, 59, 61, 53, 58, 57, 62, 61, 22, 1, 2, 9, 13, 10, 30, 25, 54, 53, 61, 59, 62, 66, 127, 103, 101, 128, 188, 180, 159, 155, 142, 135, 82, 138, 93, 72, 73, 60, 182, 242, 243, 150, 119, 112, 134, 159, 155, 211, 119, 38, 69, 75, 80, 48, 87, 83, 70, 72, 68, 71, 74, 59, 63, 62, 57, 57, 81, 81, 81, 76, 75, 76, 73, 59, 47, 67, 72, 68, 78, 70, 75, 68, 66, 63, 61, 60, 79, 81, 82, 84, 82, 86, 82, 84, 59, 70, 65, 71, 68, 79, 80, 74, 78, 72, 75, 80, 76, 78, 79, 93, 137, 243, 150, 84, 79, 94, 108, 118, 105, 99, 93, 198, 238, 90, 71, 81, 141, 106, 137, 118, 48, 5, 5, 7, 14, 73, 144, 141, 100, 71, 73, 70, 65, 63, 70, 59, 20, 57, 128, 126, 56, 60, 70, 59, 55, 58, 66, 68, 65, 67, 67, 66, 66, 72, 66, 65, 65, 64, 62, 62, 63, 61, 72, 64, 60, 61, 57, 58, 61, 54, 58, 58, 54, 55, 57, 55, 58, 58, 56, 57, 56, 57, 55, 44, 46, 47, 54, 52, 31, 32, 31, 29, 34, 30, 32, 32, 37, 38, 45, 44, 39, 34, 37, 44, 47, 44, 42, 42, 45, 43, 42, 46, 45, 46, 48, 47, 49, 47, 49, 53, 53, 52, 51, 55, 48, 56, 49, 52, 53, 51, 50, 52, 56, 56, 56, 57, 57, 58, 60, 62, 56, 53, 58, 52, 59, 58, 54, 55, 53, 53, 55, 55, 60, 58, 62, 33, 12, 16, 47, 61, 37, 4, 42, 61, 66, 61, 62, 69, 91, 130, 152, 114, 107, 101, 96, 114, 108, 134, 148, 114, 80, 72, 67, 61, 106, 142, 107, 97, 98, 106, 100, 80, 58, 73, 53, 43, 73, 73, 81, 48, 85, 81, 72, 73, 69, 70, 73, 64, 63, 66, 63, 59, 77, 76, 82, 77, 75, 81, 74, 58, 50, 70, 68, 67, 76, 71, 73, 67, 65, 64, 63, 64, 76, 82, 76, 80, 80, 82, 84, 79, 59, 65, 63, 68, 68, 80, 79, 80, 81, 76, 75, 80, 64, 73, 84, 78, 113, 211, 122, 117, 115, 98, 93, 92, 98, 100, 119, 215, 186, 83, 75, 80, 114, 78, 173, 194, 155, 96, 61, 67, 163, 181, 188, 119, 119, 71, 71, 70, 68, 64, 61, 4, 3, 4, 21, 60, 43, 67, 69, 61, 64, 58, 58, 61, 63, 67, 70, 64, 69, 69, 67, 67, 67, 65, 64, 59, 62, 66, 63, 62, 59, 59, 57, 60, 60, 59, 58, 55, 56, 57, 60, 60, 62, 58, 58, 56, 55, 57, 56, 47, 53, 50, 53, 49, 37, 29, 30, 28, 35, 37, 34, 30, 38, 39, 41, 43, 45, 41, 41, 45, 45, 46, 42, 38, 43, 43, 43, 44, 48, 49, 45, 46, 50, 47, 41, 48, 48, 51, 50, 52, 45, 55, 50, 53, 53, 53, 52, 54, 53, 53, 53, 57, 60, 59, 55, 55, 55, 53, 59, 53, 58, 56, 55, 56, 54, 53, 58, 58, 59, 55, 55, 17, 17, 2, 3, 3, 3, 2, 35, 61, 61, 60, 61, 69, 87, 158, 163, 142, 112, 121, 103, 112, 141, 131, 112, 197, 149, 69, 72, 70, 85, 72, 70, 73, 74, 84, 70, 62, 48, 51, 50, 45, 70, 77, 81, 52, 133, 90, 69, 72, 69, 65, 71, 62, 65, 65, 63, 60, 81, 80, 80, 75, 73, 82, 78, 59, 52, 73, 69, 68, 73, 70, 71, 64, 63, 65, 65, 67, 75, 82, 77, 82, 77, 81, 82, 79, 56, 65, 62, 63, 67, 83, 79, 82, 82, 77, 77, 76, 62, 75, 89, 82, 79, 108, 86, 110, 124, 113, 109, 102, 109, 113, 119, 124, 85, 70, 77, 82, 99, 139, 155, 167, 177, 174, 149, 140, 194, 155, 102, 153, 123, 67, 72, 71, 71, 74, 51, 33, 36, 6, 5, 18, 67, 65, 64, 66, 59, 60, 60, 59, 64, 62, 61, 65, 61, 61, 62, 67, 62, 64, 62, 65, 67, 59, 61, 63, 67, 60, 62, 64, 61, 59, 62, 62, 58, 59, 63, 63, 56, 58, 59, 54, 58, 58, 49, 49, 55, 53, 48, 34, 27, 31, 33, 36, 33, 33, 33, 39, 38, 37, 39, 40, 43, 44, 44, 43, 40, 42, 39, 44, 43, 42, 44, 45, 46, 47, 49, 49, 48, 49, 51, 52, 50, 50, 50, 48, 49, 49, 54, 52, 55, 54, 52, 52, 50, 53, 58, 58, 56, 59, 56, 58, 54, 56, 57, 62, 57, 53, 55, 54, 52, 55, 57, 57, 55, 52, 3, 13, 10, 1, 5, 3, 3, 7, 14, 60, 67, 62, 66, 70, 159, 206, 144, 151, 127, 150, 164, 148, 141, 107, 125, 239, 212, 80, 74, 66, 95, 68, 70, 73, 71, 74, 71, 64, 48, 51, 51, 45, 64, 76, 79, 61, 126, 95, 69, 74, 71, 66, 72, 63, 65, 65, 63, 60, 80, 84, 80, 80, 75, 80, 76, 61, 51, 71, 74, 70, 71, 71, 71, 70, 63, 69, 70, 64, 73, 83, 79, 84, 82, 86, 81, 81, 54, 65, 63, 64, 68, 82, 81, 84, 83, 76, 82, 80, 54, 77, 89, 79, 71, 62, 66, 71, 96, 98, 90, 87, 94, 106, 97, 76, 96, 77, 76, 78, 113, 186, 156, 124, 130, 100, 122, 110, 130, 142, 111, 150, 89, 70, 71, 72, 73, 68, 30, 42, 61, 41, 29, 13, 10, 61, 68, 71, 64, 60, 62, 57, 60, 59, 58, 63, 58, 59, 59, 57, 68, 66, 66, 62, 62, 63, 67, 63, 63, 69, 61, 64, 64, 62, 62, 63, 66, 60, 60, 63, 65, 59, 55, 59, 58, 60, 57, 53, 51, 55, 53, 47, 33, 33, 33, 33, 32, 34, 36, 41, 36, 38, 38, 42, 39, 44, 46, 42, 42, 39, 37, 39, 43, 45, 43, 44, 47, 50, 47, 44, 44, 51, 53, 44, 49, 47, 53, 49, 50, 46, 48, 56, 53, 53, 53, 51, 55, 56, 55, 56, 59, 56, 62, 57, 60, 53, 55, 59, 65, 59, 57, 55, 51, 58, 62, 59, 59, 54, 50, 3, 12, 1, 1, 14, 18, 13, 10, 57, 65, 66, 67, 66, 186, 246, 220, 173, 121, 120, 116, 111, 127, 160, 228, 242, 175, 76, 72, 77, 85, 69, 77, 74, 63, 70, 68, 66, 50, 51, 51, 38, 60, 76, 75, 51, 87, 90, 74, 73, 67, 68, 70, 64, 67, 67, 62, 57, 77, 81, 79, 79, 77, 83, 80, 62, 46, 72, 74, 70, 73, 72, 73, 74, 70, 70, 71, 64, 71, 81, 79, 82, 85, 84, 81, 78, 59, 66, 66, 63, 67, 82, 81, 80, 81, 74, 83, 87, 58, 81, 85, 81, 71, 62, 61, 63, 68, 80, 77, 81, 83, 99, 88, 83, 115, 77, 79, 83, 176, 196, 108, 93, 142, 111, 101, 94, 117, 150, 132, 166, 106, 71, 72, 72, 72, 69, 21, 11, 15, 18, 13, 5, 47, 70, 66, 61, 62, 64, 61, 63, 60, 62, 61, 58, 63, 58, 55, 65, 66, 64, 64, 62, 66, 63, 63, 63, 69, 67, 58, 58, 57, 58, 63, 65, 63, 63, 62, 61, 59, 56, 58, 59, 56, 57, 57, 57, 58, 53, 48, 32, 34, 32, 36, 37, 36, 39, 43, 39, 42, 37, 41, 43, 45, 43, 44, 44, 35, 38, 47, 49, 50, 43, 41, 45, 51, 42, 42, 50, 47, 52, 48, 48, 51, 51, 50, 48, 48, 51, 56, 51, 52, 51, 48, 56, 61, 58, 58, 57, 53, 56, 57, 63, 55, 62, 62, 64, 58, 61, 58, 52, 60, 61, 56, 58, 56, 50, 2, 22, 11, 5, 1, 24, 2, 46, 59, 62, 68, 73, 131, 242, 252, 218, 114, 111, 100, 148, 236, 247, 252, 179, 140, 82, 71, 73, 85, 80, 67, 64, 69, 68, 69, 68, 49, 50, 55, 41, 62, 80, 78, 54, 69, 77, 75, 72, 69, 70, 72, 67, 66, 64, 58, 57, 79, 85, 83, 80, 81, 84, 87, 75, 48, 73, 70, 68, 76, 77, 77, 73, 76, 69, 70, 67, 75, 81, 83, 84, 84, 92, 86, 79, 61, 63, 65, 68, 69, 77, 75, 75, 77, 71, 78, 125, 113, 77, 85, 92, 71, 60, 60, 67, 68, 81, 78, 77, 83, 95, 81, 86, 87, 76, 67, 87, 201, 210, 97, 87, 138, 136, 141, 143, 143, 126, 130, 228, 165, 64, 73, 72, 67, 57, 12, 7, 2, 6, 8, 53, 81, 64, 61, 64, 63, 63, 61, 65, 60, 59, 61, 67, 61, 60, 64, 62, 59, 66, 62, 61, 63, 64, 66, 65, 61, 64, 63, 52, 53, 65, 56, 59, 60, 63, 62, 60, 54, 53, 60, 56, 58, 54, 54, 59, 58, 52, 32, 33, 34, 39, 37, 36, 38, 37, 38, 36, 37, 43, 41, 47, 44, 42, 39, 37, 44, 45, 42, 44, 40, 46, 44, 43, 42, 44, 45, 53, 54, 55, 47, 53, 46, 50, 49, 46, 52, 52, 47, 52, 50, 51, 55, 60, 57, 61, 56, 51, 56, 58, 54, 53, 55, 55, 52, 57, 61, 54, 53, 60, 57, 58, 55, 57, 48, 3, 13, 3, 5, 4, 2, 3, 66, 67, 70, 67, 67, 126, 218, 218, 152, 107, 104, 113, 164, 215, 210, 223, 176, 146, 67, 71, 71, 90, 67, 70, 80, 74, 70, 69, 67, 58, 50, 52, 45, 72, 84, 81, 53, 74, 76, 79, 69, 72, 67, 74, 65, 61, 62, 58, 57, 80, 78, 80, 82, 82, 79, 82, 97, 52, 67, 69, 69, 77, 80, 81, 81, 74, 69, 74, 65, 73, 86, 85, 85, 85, 89, 80, 82, 58, 66, 67, 71, 70, 74, 77, 77, 78, 75, 78, 115, 108, 79, 82, 79, 67, 61, 63, 66, 72, 79, 83, 78, 86, 91, 72, 85, 83, 74, 78, 81, 146, 225, 168, 92, 89, 98, 115, 125, 137, 150, 229, 248, 194, 65, 75, 77, 73, 57, 3, 13, 8, 4, 7, 5, 6, 41, 62, 64, 61, 66, 64, 67, 59, 64, 57, 64, 58, 65, 61, 64, 61, 59, 58, 67, 65, 68, 66, 61, 60, 62, 60, 60, 59, 53, 60, 64, 56, 58, 50, 57, 56, 58, 56, 57, 57, 58, 54, 52, 51, 54, 55, 46, 35, 39, 34, 36, 40, 40, 38, 33, 38, 36, 36, 42, 39, 39, 39, 37, 41, 39, 41, 39, 42, 42, 43, 47, 43, 42, 45, 47, 50, 54, 50, 49, 42, 49, 54, 47, 49, 50, 54, 50, 56, 55, 54, 57, 56, 59, 55, 57, 57, 56, 58, 60, 53, 59, 57, 57, 54, 55, 59, 53, 58, 57, 61, 64, 64, 53, 63, 6, 8, 5, 4, 3, 5, 1, 4, 98, 146, 86, 62, 67, 91, 181, 201, 151, 108, 91, 89, 92, 102, 171, 197, 150, 101, 73, 67, 61, 89, 77, 73, 72, 65, 68, 64, 63, 56, 52, 56, 49, 68, 79, 91, 60, 75, 78, 73, 69, 70, 69, 72, 63, 60, 63, 67, 56, 74, 85, 82, 86, 81, 80, 74, 67, 50, 67, 74, 70, 74, 74, 80, 79, 73, 71, 70, 67, 79, 90, 88, 90, 87, 84, 84, 85, 56, 64, 64, 70, 70, 76, 73, 79, 82, 79, 78, 74, 61, 77, 78, 80, 70, 68, 64, 65, 72, 81, 80, 80, 85, 100, 79, 86, 81, 78, 79, 74, 158, 197, 140, 121, 115, 113, 118, 119, 135, 209, 243, 195, 145, 65, 75, 76, 73, 50, 9, 16, 9, 2, 1, 5, 20, 13, 68, 70, 65, 67, 66, 64, 61, 69, 64, 65, 62, 65, 69, 60, 62, 60, 63, 62, 62, 67, 62, 61, 59, 52, 59, 58, 57, 56, 56, 60, 58, 59, 55, 56, 56, 59, 57, 55, 51, 55, 59, 56, 53, 54, 54, 49, 35, 39, 35, 34, 37, 39, 39, 36, 37, 35, 36, 41, 39, 39, 36, 36, 38, 43, 41, 42, 44, 39, 41, 46, 47, 46, 46, 47, 49, 52, 50, 46, 44, 47, 50, 50, 50, 51, 52, 50, 50, 54, 48, 53, 58, 55, 54, 55, 55, 52, 57, 57, 54, 59, 58, 56, 57, 56, 50, 54, 56, 59, 57, 65, 63, 63, 104, 27, 1, 1, 7, 6, 2, 21, 35, 110, 178, 131, 70, 79, 74, 176, 199, 176, 119, 65, 75, 71, 117, 199, 160, 150, 184, 79, 69, 74, 79, 76, 73, 78, 68, 69, 69, 67, 56, 55, 56, 46, 68, 81, 85, 59, 78, 76, 75, 70, 69, 70, 70, 65, 65, 69, 70, 58, 80, 84, 85, 85, 79, 81, 78, 69, 51, 74, 75, 71, 75, 71, 75, 75, 74, 73, 72, 67, 81, 88, 85, 85, 85, 82, 87, 88, 57, 68, 65, 66, 68, 79, 80, 82, 80, 77, 82, 79, 57, 77, 83, 82, 69, 66, 61, 63, 71, 82, 82, 77, 83, 98, 79, 95, 84, 77, 78, 75, 122, 187, 150, 113, 115, 126, 119, 116, 129, 226, 197, 182, 115, 73, 77, 75, 69, 46, 12, 8, 13, 10, 4, 5, 4, 18, 16, 67, 67, 65, 65, 64, 65, 61, 67, 65, 66, 61, 66, 66, 63, 61, 59, 64, 60, 63, 65, 64, 60, 58, 58, 57, 56, 58, 54, 56, 56, 59, 61, 58, 58, 58, 54, 55, 55, 55, 53, 56, 56, 49, 56, 58, 55, 37, 35, 34, 34, 33, 37, 37, 34, 37, 39, 36, 40, 41, 41, 37, 36, 40, 40, 40, 43, 39, 36, 39, 41, 44, 47, 48, 48, 51, 49, 51, 49, 46, 48, 48, 50, 49, 53, 52, 49, 48, 58, 46, 52, 56, 55, 58, 53, 54, 52, 57, 57, 60, 58, 54, 54, 56, 54, 48, 56, 59, 53, 51, 58, 60, 66, 116, 69, 15, 1, 7, 2, 27, 131, 152, 114, 97, 138, 69, 71, 131, 227, 167, 158, 128, 111, 124, 127, 158, 146, 153, 213, 240, 92, 71, 74, 94, 74, 72, 77, 70, 70, 67, 70, 58, 58, 56, 43, 67, 83, 78, 56, 76, 75, 71, 70, 69, 73, 71, 67, 65, 68, 68, 60, 85, 86, 84, 82, 79, 82, 83, 73, 52, 74, 74, 70, 77, 75, 77, 75, 72, 73, 74, 65, 80, 84, 83, 80, 82, 80, 84, 84, 59, 73, 68, 66, 65, 80, 80, 80, 80, 78, 84, 80, 62, 81, 84, 84, 69, 65, 59, 60, 65, 77, 78, 76, 82, 100, 80, 91, 99, 79, 77, 77, 109, 217, 184, 134, 109, 100, 104, 117, 148, 208, 162, 178, 84, 73, 81, 76, 102, 64, 7, 6, 2, 2, 2, 7, 33, 86, 67, 63, 61, 63, 65, 63, 65, 65, 66, 61, 65, 59, 63, 63, 61, 65, 61, 63, 63, 65, 60, 56, 63, 60, 47, 58, 53, 54, 56, 60, 61, 60, 58, 56, 57, 58, 56, 60, 54, 52, 56, 48, 50, 56, 54, 33, 35, 32, 33, 38, 36, 35, 38, 36, 35, 34, 38, 41, 40, 37, 35, 40, 42, 40, 44, 37, 38, 40, 42, 47, 51, 46, 46, 50, 46, 49, 53, 51, 50, 49, 51, 50, 55, 53, 52, 54, 58, 50, 52, 54, 55, 59, 53, 52, 52, 56, 57, 56, 54, 55, 59, 53, 54, 53, 56, 55, 53, 62, 58, 58, 85, 94, 114, 56, 43, 87, 78, 110, 202, 197, 96, 60, 128, 65, 68, 149, 249, 232, 177, 109, 106, 106, 100, 131, 186, 232, 246, 149, 68, 71, 72, 104, 72, 74, 75, 71, 74, 66, 71, 59, 57, 52, 43, 66, 84, 82, 59, 71, 75, 73, 70, 72, 74, 73, 66, 63, 64, 63, 58, 84, 83, 85, 77, 80, 81, 81, 74, 51, 73, 74, 68, 76, 74, 72, 75, 74, 74, 77, 68, 73, 82, 82, 84, 83, 81, 86, 84, 60, 71, 69, 68, 66, 81, 86, 79, 79, 80, 85, 83, 62, 82, 88, 86, 70, 68, 58, 61, 66, 78, 79, 78, 81, 95, 80, 88, 124, 81, 81, 85, 194, 215, 122, 109, 117, 87, 87, 122, 175, 185, 132, 165, 80, 78, 76, 95, 146, 109, 1, 9, 5, 5, 6, 93, 123, 73, 72, 70, 71, 64, 62, 66, 69, 69, 62, 65, 59, 64, 61, 62, 62, 60, 59, 61, 59, 61, 58, 63, 59, 47, 54, 55, 58, 57, 62, 57, 56, 57, 54, 60, 60, 59, 55, 55, 50, 55, 48, 49, 50, 52, 33, 35, 31, 30, 32, 33, 33, 36, 33, 33, 36, 36, 39, 36, 33, 36, 37, 40, 40, 41, 39, 39, 39, 47, 50, 53, 47, 48, 52, 49, 48, 46, 48, 43, 46, 49, 51, 50, 54, 58, 54, 46, 54, 56, 54, 51, 54, 57, 55, 58, 53, 54, 58, 60, 53, 61, 56, 55, 54, 59, 51, 59, 59, 53, 54, 134, 112, 96, 92, 97, 136, 122, 146, 122, 86, 101, 106, 102, 76, 70, 88, 216, 245, 244, 133, 99, 90, 130, 239, 253, 251, 207, 30, 67, 78, 69, 84, 76, 77, 79, 69, 73, 70, 72, 59, 61, 56, 48, 64, 77, 78, 60, 69, 75, 77, 72, 74, 73, 73, 67, 57, 62, 61, 62, 82, 81, 82, 80, 82, 79, 78, 69, 49, 72, 73, 70, 80, 79, 79, 71, 72, 72, 75, 64, 73, 82, 82, 85, 82, 82, 85, 86, 62, 72, 69, 69, 68, 81, 88, 83, 79, 78, 80, 81, 59, 81, 88, 79, 69, 71, 62, 65, 68, 75, 78, 76, 83, 99, 79, 77, 78, 80, 85, 92, 215, 246, 101, 90, 130, 120, 116, 124, 151, 134, 138, 236, 131, 74, 74, 118, 113, 94, 72, 22, 2, 2, 8, 134, 124, 79, 77, 72, 72, 72, 66, 67, 67, 66, 59, 65, 63, 66, 56, 58, 58, 64, 58, 57, 58, 63, 59, 61, 60, 53, 54, 57, 58, 59, 56, 53, 54, 55, 53, 65, 62, 66, 55, 55, 53, 56, 50, 50, 49, 55, 34, 32, 30, 30, 24, 35, 35, 38, 35, 37, 38, 40, 38, 36, 34, 41, 38, 38, 36, 39, 40, 36, 42, 49, 45, 48, 45, 49, 50, 49, 46, 48, 52, 49, 48, 45, 48, 47, 52, 50, 52, 56, 52, 52, 55, 56, 58, 54, 57, 55, 53, 57, 60, 58, 56, 60, 57, 50, 55, 58, 59, 63, 56, 56, 53, 95, 157, 103, 92, 83, 82, 82, 76, 71, 133, 179, 174, 78, 81, 72, 85, 135, 212, 159, 108, 108, 108, 156, 231, 234, 233, 105, 40, 61, 72, 59, 72, 80, 75, 83, 76, 74, 71, 73, 58, 56, 53, 50, 66, 81, 80, 59, 72, 76, 69, 75, 76, 73, 73, 65, 63, 69, 64, 64, 80, 85, 82, 85, 76, 75, 77, 68, 49, 73, 73, 71, 78, 70, 71, 75, 74, 71, 74, 63, 81, 83, 83, 82, 83, 86, 85, 84, 59, 72, 70, 72, 71, 78, 76, 79, 84, 78, 81, 80, 62, 86, 83, 81, 70, 72, 62, 67, 70, 78, 78, 73, 85, 95, 79, 85, 71, 86, 84, 78, 160, 250, 160, 86, 78, 90, 98, 109, 95, 128, 218, 244, 166, 73, 74, 98, 63, 92, 166, 144, 61, 25, 17, 25, 63, 126, 109, 88, 69, 65, 67, 72, 65, 62, 63, 68, 64, 64, 65, 63, 55, 59, 56, 57, 62, 64, 62, 62, 58, 60, 60, 52, 56, 57, 55, 58, 56, 58, 55, 53, 51, 59, 57, 62, 56, 54, 56, 55, 54, 48, 44, 54, 30, 30, 31, 30, 27, 33, 32, 41, 35, 35, 41, 41, 40, 36, 39, 39, 40, 43, 36, 39, 38, 36, 45, 48, 45, 46, 44, 49, 45, 46, 45, 48, 48, 48, 49, 51, 54, 46, 55, 55, 51, 52, 52, 56, 54, 55, 60, 55, 54, 47, 55, 60, 53, 52, 59, 54, 55, 55, 62, 58, 62, 56, 57, 60, 64, 61, 104, 93, 124, 105, 91, 103, 101, 108, 114, 120, 168, 158, 71, 87, 96, 99, 105, 76, 90, 80, 99, 114, 123, 92, 100, 47, 43, 69, 68, 61, 69, 84, 77, 80, 74, 75, 72, 73, 57, 55, 54, 51, 66, 81, 82, 59, 69, 80, 75, 75, 77, 75, 73, 67, 56, 66, 64, 63, 78, 84, 84, 85, 78, 77, 75, 62, 50, 71, 72, 73, 80, 71, 73, 77, 76, 70, 72, 65, 85, 86, 83, 86, 89, 85, 87, 86, 59, 71, 68, 74, 75, 80, 77, 82, 85, 76, 79, 77, 54, 82, 80, 81, 72, 73, 65, 70, 69, 76, 72, 73, 86, 97, 81, 95, 76, 83, 84, 82, 105, 197, 142, 111, 110, 101, 102, 104, 134, 220, 239, 191, 116, 75, 83, 88, 107, 95, 127, 134, 124, 109, 99, 95, 96, 128, 121, 106, 67, 67, 68, 68, 65, 62, 66, 70, 66, 68, 66, 60, 59, 61, 59, 61, 65, 60, 60, 59, 57, 58, 57, 53, 51, 57, 57, 54, 58, 57, 51, 50, 51, 51, 55, 58, 54, 53, 53, 50, 55, 48, 44, 53, 31, 29, 35, 30, 29, 33, 32, 39, 37, 36, 38, 38, 41, 38, 35, 37, 40, 41, 43, 43, 40, 41, 43, 46, 47, 48, 45, 46, 45, 46, 45, 47, 48, 48, 49, 53, 53, 52, 53, 54, 50, 52, 53, 54, 54, 53, 49, 55, 57, 53, 54, 55, 56, 50, 55, 60, 54, 58, 56, 60, 60, 56, 59, 56, 61, 70, 140, 111, 129, 120, 115, 114, 125, 126, 89, 105, 207, 197, 69, 78, 100, 88, 84, 83, 86, 69, 78, 73, 60, 47, 53, 45, 43, 64, 76, 73, 96, 88, 82, 82, 82, 76, 75, 75, 59, 60, 58, 53, 65, 82, 77, 61, 62, 79, 78, 77, 79, 76, 76, 73, 54, 64, 63, 60, 80, 84, 86, 83, 81, 82, 79, 65, 55, 75, 72, 70, 77, 74, 74, 76, 74, 75, 75, 64, 86, 89, 85, 88, 88, 86, 91, 84, 60, 68, 67, 73, 75, 83, 81, 83, 88, 78, 79, 76, 53, 84, 85, 79, 76, 70, 70, 74, 67, 74, 72, 78, 85, 98, 84, 92, 75, 89, 84, 88, 67, 78, 77, 93, 114, 117, 116, 113, 148, 228, 174, 89, 89, 79, 82, 84, 182, 147, 123, 82, 100, 119, 103, 110, 98, 134, 160, 112, 70, 74, 74, 72, 67, 60, 65, 71, 68, 66, 64, 59, 61, 60, 59, 62, 67, 65, 62, 60, 58, 56, 58, 55, 45, 55, 57, 56, 55, 55, 54, 50, 52, 51, 53, 55, 57, 54, 50, 50, 56, 47, 50, 49, 31, 32, 34, 29, 33, 34, 32, 39, 38, 39, 40, 39, 40, 41, 36, 38, 43, 37, 40, 38, 40, 42, 43, 47, 50, 50, 51, 48, 49, 49, 44, 50, 51, 51, 48, 53, 54, 54, 48, 51, 54, 57, 54, 51, 55, 53, 50, 58, 56, 55, 57, 56, 54, 51, 57, 60, 55, 56, 56, 58, 58, 54, 62, 59, 61, 85, 184, 151, 114, 107, 120, 119, 114, 95, 110, 179, 218, 179, 70, 72, 97, 83, 83, 84, 88, 74, 81, 75, 63, 50, 53, 43, 44, 63, 80, 68, 93, 87, 87, 81, 72, 75, 73, 76, 64, 64, 59, 51, 65, 80, 81, 66, 65, 81, 78, 79, 79, 79, 76, 71, 58, 70, 69, 61, 83, 88, 87, 83, 82, 81, 78, 77, 52, 81, 72, 71, 77, 76, 76, 80, 74, 75, 76, 65, 85, 86, 86, 86, 87, 90, 91, 85, 64, 72, 70, 74, 74, 81, 79, 85, 88, 80, 82, 82, 59, 88, 87, 85, 79, 68, 69, 72, 67, 82, 81, 80, 88, 104, 85, 90, 75, 91, 85, 84, 66, 60, 66, 69, 92, 97, 88, 81, 107, 147, 105, 77, 81, 85, 80, 123, 186, 117, 124, 101, 87, 101, 68, 99, 109, 112, 134, 77, 65, 71, 70, 70, 70, 62, 66, 70, 69, 66, 62, 61, 59, 63, 64, 61, 66, 64, 61, 60, 61, 61, 62, 54, 49, 58, 59, 58, 57, 56, 56, 49, 48, 51, 54, 54, 59, 57, 52, 52, 53, 47, 45, 42, 30, 31, 32, 28, 32, 35, 32, 34, 39, 41, 38, 40, 35, 37, 36, 40, 47, 43, 45, 40, 44, 43, 40, 46, 51, 48, 51, 50, 54, 50, 46, 51, 54, 50, 51, 54, 55, 54, 50, 52, 54, 56, 56, 56, 56, 54, 52, 61, 49, 53, 56, 55, 55, 57, 58, 56, 56, 56, 53, 58, 57, 57, 61, 58, 57, 106, 183, 179, 164, 106, 91, 98, 117, 139, 189, 214, 208, 202, 74, 76, 86, 73, 84, 84, 86, 72, 73, 70, 65, 55, 56, 46, 52, 65, 81, 61, 74, 87, 83, 87, 76, 73, 73, 72, 64, 63, 62, 51, 66, 80, 83, 75, 70, 83, 81, 78, 81, 78, 75, 70, 60, 68, 68, 62, 82, 88, 87, 88, 84, 83, 77, 94, 61, 79, 75, 72, 78, 77, 79, 80, 72, 74, 76, 67, 81, 87, 80, 87, 85, 88, 89, 87, 67, 75, 73, 76, 77, 82, 78, 84, 87, 82, 86, 89, 61, 90, 90, 93, 75, 72, 71, 71, 69, 88, 84, 80, 90, 106, 85, 96, 77, 91, 82, 84, 69, 64, 65, 69, 84, 76, 77, 68, 99, 97, 89, 74, 80, 87, 78, 161, 194, 78, 129, 117, 104, 94, 95, 125, 130, 108, 151, 83, 72, 70, 71, 68, 72, 65, 66, 68, 67, 67, 63, 59, 59, 66, 66, 65, 61, 64, 63, 59, 60, 61, 61, 53, 52, 61, 64, 64, 62, 59, 54, 50, 55, 55, 53, 55, 59, 57, 52, 55, 48, 45, 42, 39, 34, 32, 32, 27, 26, 36, 37, 31, 37, 37, 37, 39, 33, 38, 41, 46, 46, 45, 42, 43, 44, 44, 43, 44, 46, 48, 50, 49, 45, 53, 46, 49, 53, 51, 52, 48, 54, 53, 57, 55, 58, 58, 49, 54, 56, 53, 54, 64, 50, 55, 55, 51, 53, 59, 54, 53, 60, 56, 55, 61, 55, 54, 58, 59, 64, 100, 146, 171, 200, 109, 106, 110, 128, 165, 162, 146, 191, 143, 70, 79, 82, 72, 83, 88, 90, 73, 73, 68, 68, 60, 55, 47, 56, 60, 80, 68, 70, 87, 79, 90, 76, 71, 72, 72, 66, 65, 58, 53, 64, 80, 89, 73, 74, 84, 83, 79, 76, 74, 79, 67, 59, 70, 67, 65, 85, 90, 86, 86, 86, 84, 86, 89, 57, 83, 74, 71, 75, 76, 79, 76, 73, 77, 77, 67, 79, 94, 83, 92, 85, 89, 89, 91, 67, 77, 77, 78, 80, 84, 81, 84, 85, 83, 91, 89, 59, 91, 90, 91, 74, 75, 73, 76, 72, 88, 83, 82, 92, 104, 87, 94, 72, 94, 83, 87, 72, 65, 69, 68, 91, 75, 86, 84, 102, 102, 98, 77, 83, 77, 86, 164, 254, 169, 83, 102, 115, 146, 148, 140, 130, 124, 182, 117, 65, 69, 71, 70, 74, 70, 65, 66, 66, 70, 59, 60, 62, 64, 64, 63, 63, 65, 67, 63, 65, 64, 57, 56, 54, 61, 66, 65, 62, 58, 53, 53, 60, 55, 53, 56, 57, 56, 50, 52, 51, 48, 49, 46, 35, 32, 36, 34, 32, 35, 38, 35, 39, 36, 36, 32, 39, 42, 36, 42, 41, 46, 43, 44, 40, 45, 48, 45, 45, 47, 47, 47, 40, 54, 49, 55, 52, 54, 52, 51, 56, 51, 61, 58, 56, 61, 51, 51, 59, 54, 50, 62, 51, 56, 52, 52, 56, 58, 53, 56, 60, 52, 56, 60, 57, 58, 61, 58, 63, 87, 182, 163, 173, 112, 81, 91, 115, 119, 85, 118, 180, 99, 76, 72, 79, 80, 90, 92, 93, 74, 67, 69, 70, 55, 55, 46, 63, 63, 82, 76, 70, 91, 88, 89, 75, 75, 77, 78, 68, 64, 58, 52, 60, 85, 89, 58, 69, 83, 84, 80, 77, 75, 80, 71, 64, 78, 69, 65, 86, 93, 85, 82, 90, 90, 88, 102, 60, 85, 78, 73, 75, 74, 75, 79, 77, 78, 79, 70, 87, 93, 88, 93, 90, 97, 90, 92, 69, 77, 76, 75, 79, 87, 88, 89, 87, 85, 93, 88, 58, 88, 89, 88, 79, 73, 71, 77, 72, 85, 83, 84, 93, 103, 88, 91, 67, 94, 86, 88, 80, 62, 65, 72, 89, 80, 83, 85, 107, 100, 94, 80, 80, 83, 83, 177, 248, 242, 177, 107, 106, 117, 111, 109, 138, 168, 204, 128, 74, 74, 67, 66, 72, 70, 68, 69, 67, 67, 60, 62, 64, 64, 66, 61, 62, 61, 68, 62, 61, 61, 57, 60, 57, 59, 62, 59, 58, 58, 57, 57, 57, 58, 59, 60, 62, 61, 55, 52, 52, 52, 50, 50, 33, 29, 34, 35, 34, 34, 36, 39, 41, 37, 38, 35, 39, 38, 42, 46, 43, 43, 41, 48, 47, 46, 43, 43, 47, 46, 45, 49, 45, 52, 51, 51, 50, 53, 50, 55, 53, 52, 55, 56, 53, 57, 56, 54, 62, 57, 53, 56, 51, 56, 54, 53, 54, 55, 54, 58, 56, 55, 58, 60, 56, 58, 63, 54, 61, 57, 96, 73, 138, 101, 73, 61, 64, 55, 63, 77, 148, 178, 85, 76, 84, 91, 91, 90, 92, 80, 73, 76, 79, 60, 57, 48, 63, 61, 78, 71, 76, 91, 88, 92, 81, 78, 81, 78, 64, 61, 57, 55, 59, 90, 85, 53, 66, 86, 84, 82, 78, 80, 77, 74, 63, 74, 68, 66, 89, 92, 92, 90, 92, 91, 90, 80, 49, 82, 81, 76, 79, 75, 73, 83, 77, 79, 80, 70, 88, 97, 94, 94, 91, 95, 92, 95, 69, 71, 72, 72, 77, 90, 90, 90, 88, 83, 91, 84, 60, 89, 89, 86, 82, 74, 70, 74, 73, 79, 83, 84, 93, 112, 89, 92, 63, 95, 85, 89, 77, 68, 68, 76, 87, 83, 81, 87, 114, 110, 98, 79, 79, 82, 81, 144, 222, 198, 175, 131, 126, 115, 111, 126, 157, 166, 185, 114, 78, 77, 69, 71, 72, 67, 71, 71, 67, 67, 68, 64, 67, 63, 65, 63, 65, 64, 68, 60, 60, 61, 62, 56, 57, 58, 62, 59, 56, 62, 59, 58, 53, 55, 53, 52, 57, 57, 56, 51, 51, 51, 47, 50, 31, 30, 32, 33, 34, 35, 33, 38, 37, 39, 39, 42, 37, 35, 40, 43, 46, 44, 42, 46, 48, 48, 44, 47, 48, 49, 50, 50, 52, 54, 52, 49, 49, 53, 47, 50, 47, 57, 52, 55, 54, 54, 54, 56, 61, 59, 53, 51, 52, 53, 53, 53, 54, 54, 56, 60, 54, 55, 59, 61, 59, 63, 62, 59, 67, 60, 101, 89, 105, 106, 85, 72, 83, 87, 78, 74, 177, 192, 84, 76, 84, 92, 92, 90, 91, 84, 77, 78, 82, 67, 59, 54, 59, 62, 79, 74, 79, 90, 89, 91, 83, 79, 80, 74, 63, 63, 59, 61, 58, 92, 87, 54, 66, 86, 86, 86, 80, 78, 77, 75, 65, 68, 68, 69, 88, 94, 94, 92, 94, 93, 90, 77, 48, 84, 81, 74, 79, 77, 77, 84, 79, 79, 82, 72, 90, 99, 97, 95, 93, 92, 96, 98, 68, 73, 76, 74, 80, 89, 89, 87, 88, 83, 89, 81, 65, 94, 93, 86, 78, 74, 71, 72, 74, 80, 83, 84, 91, 114, 91, 93, 65, 93, 85, 94, 78, 72, 66, 79, 89, 81, 84, 92, 109, 115, 102, 76, 83, 86, 84, 105, 214, 150, 115, 115, 118, 123, 103, 128, 135, 155, 194, 108, 76, 76, 69, 72, 73, 67, 72, 68, 68, 66, 68, 60, 63, 63, 63, 60, 62, 63, 65, 64, 61, 62, 61, 58, 60, 59, 60, 60, 57, 62, 59, 59, 56, 55, 52, 54, 57, 57, 56, 52, 56, 51, 45, 49, 31, 31, 32, 34, 37, 37, 35, 39, 37, 41, 36, 39, 40, 40, 39, 40, 50, 43, 41, 41, 44, 49, 50, 47, 47, 51, 46, 46, 50, 55, 52, 47, 49, 54, 51, 52, 50, 49, 53, 55, 53, 54, 52, 56, 58, 58, 54, 51, 56, 55, 53, 56, 59, 55, 58, 58, 52, 56, 61, 61, 62, 64, 59, 68, 69, 65, 152, 126, 102, 91, 85, 87, 81, 72, 85, 158, 173, 110, 70, 77, 84, 88, 94, 95, 96, 85, 75, 77, 77, 63, 59, 56, 59, 67, 87, 80, 80, 93, 91, 89, 82, 77, 76, 73, 65, 61, 66, 63, 61, 93, 92, 63, 64, 84, 88, 86, 83, 79, 81, 76, 62, 64, 66, 71, 86, 97, 94, 90, 92, 91, 91, 89, 50, 86, 86, 78, 83, 80, 82, 88, 82, 79, 80, 75, 96, 100, 101, 95, 91, 91, 97, 99, 65, 74, 75, 73, 82, 90, 90, 87, 89, 83, 84, 85, 69, 92, 91, 90, 80, 76, 77, 74, 74, 83, 83, 90, 90, 108, 93, 92, 67, 91, 86, 91, 80, 75, 69, 76, 93, 85, 85, 89, 111, 121, 114, 76, 84, 88, 85, 136, 203, 98, 78, 74, 79, 75, 72, 115, 107, 105, 122, 79, 77, 79, 77, 69, 71, 67, 67, 64, 66, 62, 67, 63, 64, 62, 61, 60, 60, 63, 65, 65, 59, 59, 60, 58, 60, 60, 53, 63, 58, 60, 56, 57, 57, 55, 53, 58, 56, 55, 57, 57, 57, 52, 46, 49, 32, 33, 34, 36, 40, 37, 36, 38, 39, 40, 39, 40, 42, 38, 37, 37, 49, 41, 41, 42, 47, 47, 47, 44, 42, 48, 46, 47, 52, 45, 44, 39, 49, 53, 53, 51, 54, 47, 53, 55, 53, 53, 52, 58, 59, 57, 58, 56, 56, 58, 55, 60, 60, 55, 55, 56, 50, 58, 61, 59, 60, 62, 59, 67, 66, 67, 139, 151, 118, 92, 82, 81, 85, 111, 191, 229, 173, 82, 70, 77, 76, 86, 94, 92, 95, 84, 74, 73, 75, 61, 61, 57, 56, 60, 89, 83, 82, 98, 92, 89, 80, 76, 76, 78, 66, 64, 64, 66, 58, 92, 87, 71, 63, 87, 87, 83, 84, 82, 85, 77, 64, 67, 67, 72, 85, 98, 98, 94, 93, 92, 90, 88, 53, 91, 89, 81, 91, 85, 84, 92, 83, 80, 80, 78, 91, 97, 103, 100, 91, 95, 96, 101, 66, 79, 76, 73, 78, 90, 91, 89, 91, 87, 87, 87, 72, 92, 90, 92, 83, 78, 80, 75, 78, 82, 85, 89, 91, 114, 86, 93, 65, 92, 91, 94, 82, 75, 69, 77, 92, 88, 82, 91, 112, 104, 98, 77, 96, 91, 93, 179, 202, 77, 93, 75, 75, 72, 82, 110, 107, 90, 128, 81, 77, 74, 76, 64, 70, 73, 69, 71, 69, 68, 71, 69, 65, 64, 61, 67, 62, 65, 64, 63, 61, 59, 60, 56, 60, 62, 59, 64, 59, 60, 57, 58, 59, 57, 56, 55, 52, 56, 55, 56, 54, 53, 47, 47, 33, 32, 37, 38, 40, 38, 36, 36, 38, 40, 40, 39, 38, 38, 37, 39, 45, 44, 44, 41, 44, 46, 50, 47, 43, 48, 49, 48, 49, 52, 45, 44, 51, 53, 53, 51, 56, 51, 52, 55, 57, 56, 52, 57, 61, 56, 58, 58, 61, 61, 56, 63, 61, 53, 55, 65, 56, 59, 62, 60, 59, 63, 63, 59, 62, 68, 64, 114, 129, 120, 96, 111, 136, 170, 204, 128, 67, 59, 68, 81, 80, 89, 96, 94, 93, 85, 75, 74, 80, 67, 64, 58, 50, 54, 88, 83, 76, 97, 95, 89, 84, 79, 78, 81, 68, 65, 60, 65, 57, 83, 87, 70, 61, 84, 89, 83, 81, 83, 85, 79, 65, 67, 67, 70, 81, 94, 100, 100, 98, 97, 92, 87, 52, 88, 89, 85, 93, 85, 81, 92, 80, 78, 84, 77, 93, 94, 102, 104, 95, 97, 98, 100, 65, 78, 71, 75, 79, 92, 89, 89, 92, 89, 93, 85, 72, 96, 95, 92, 82, 78, 76, 73, 78, 87, 89, 83, 88, 123, 86, 94, 67, 91, 91, 92, 85, 75, 72, 81, 90, 87, 87, 92, 107, 104, 96, 77, 87, 90, 91, 160, 254, 134, 82, 93, 106, 121, 118, 117, 112, 98, 138, 81, 74, 72, 75, 68, 71, 75, 73, 73, 71, 69, 71, 69, 66, 68, 64, 70, 66, 65, 65, 63, 63, 63, 59, 63, 62, 61, 62, 59, 59, 61, 57, 58, 58, 60, 58, 55, 54, 61, 53, 56, 54, 52, 44, 46, 34, 29, 34, 35, 35, 37, 36, 37, 37, 42, 40, 34, 35, 42, 41, 45, 41, 43, 39, 50, 44, 48, 47, 42, 42, 47, 41, 50, 48, 48, 47, 54, 51, 52, 51, 55, 53, 56, 52, 53, 56, 57, 55, 53, 56, 54, 58, 57, 60, 60, 57, 61, 55, 52, 55, 60, 57, 59, 55, 55, 65, 65, 68, 65, 66, 75, 69, 92, 122, 117, 86, 86, 104, 130, 89, 36, 34, 56, 69, 78, 85, 84, 97, 99, 98, 84, 73, 73, 81, 69, 68, 56, 56, 64, 87, 86, 87, 94, 96, 89, 86, 79, 77, 81, 68, 62, 61, 68, 57, 96, 88, 74, 64, 79, 86, 80, 81, 83, 86, 80, 65, 63, 67, 70, 83, 90, 96, 94, 98, 97, 91, 89, 50, 85, 90, 89, 93, 87, 82, 91, 80, 78, 80, 74, 89, 92, 97, 103, 96, 96, 98, 95, 68, 79, 72, 78, 80, 91, 90, 90, 91, 88, 89, 83, 71, 95, 96, 95, 80, 72, 71, 73, 73, 88, 88, 87, 97, 116, 93, 93, 72, 99, 92, 88, 82, 74, 75, 84, 93, 86, 85, 90, 112, 107, 94, 75, 88, 86, 86, 122, 221, 238, 150, 85, 78, 86, 91, 101, 112, 120, 120, 91, 70, 74, 84, 78, 80, 77, 77, 70, 72, 68, 69, 69, 63, 64, 66, 70, 67, 68, 62, 60, 59, 58, 62, 60, 57, 59, 55, 60, 62, 63, 58, 58, 58, 60, 55, 56, 56, 57, 53, 53, 52, 51, 44, 47, 35, 30, 33, 34, 35, 35, 35, 34, 36, 39, 38, 37, 41, 42, 38, 44, 41, 41, 36, 40, 44, 47, 43, 44, 43, 42, 43, 46, 48, 49, 49, 53, 54, 56, 52, 53, 49, 58, 55, 51, 51, 54, 53, 55, 55, 53, 60, 55, 54, 54, 61, 60, 53, 51, 54, 58, 56, 59, 61, 58, 63, 65, 71, 67, 64, 72, 60, 91, 105, 95, 79, 70, 67, 77, 51, 48, 41, 53, 71, 82, 79, 89, 104, 99, 102, 88, 77, 75, 79, 65, 67, 59, 64, 69, 86, 92, 99, 97, 94, 90, 86, 79, 78, 81, 70, 64, 66, 67, 74, 89, 86, 78, 68, 80, 89, 78, 84, 85, 87, 79, 71, 64, 71, 76, 86, 91, 96, 91, 94, 93, 88, 89, 52, 85, 88, 88, 93, 87, 84, 91, 84, 80, 80, 79, 87, 94, 94, 99, 95, 97, 98, 96, 74, 81, 76, 79, 80, 91, 90, 90, 93, 90, 89, 83, 76, 99, 97, 98, 84, 76, 72, 72, 75, 84, 89, 91, 102, 114, 96, 94, 75, 100, 92, 87, 81, 74, 76, 85, 99, 86, 83, 92, 107, 101, 97, 73, 85, 93, 89, 82, 111, 188, 167, 109, 103, 98, 99, 108, 114, 110, 82, 70, 76, 78, 82, 83, 81, 75, 77, 72, 75, 70, 66, 68, 65, 66, 71, 70, 66, 65, 56, 60, 61, 60, 69, 60, 56, 58, 59, 57, 61, 62, 57, 58, 58, 59, 55, 55, 55, 55, 57, 55, 52, 54, 47, 47, 31, 30, 35, 35, 36, 33, 33, 28, 34, 36, 36, 38, 38, 38, 36, 40, 41, 39, 37, 44, 45, 43, 42, 42, 51, 44, 45, 41, 48, 48, 47, 49, 51, 52, 52, 49, 54, 53, 53, 51, 54, 54, 52, 54, 56, 54, 57, 58, 56, 51, 60, 57, 53, 49, 55, 62, 62, 62, 57, 57, 63, 63, 65, 63, 65, 79, 60, 88, 99, 93, 78, 71, 67, 66, 50, 48, 48, 58, 76, 82, 77, 93, 108, 97, 99, 92, 79, 78, 79, 63, 62, 63, 62, 67, 86, 92, 93, 103, 90, 91, 89, 81, 81, 83, 72, 64, 65, 68, 80, 88, 88, 74, 70, 88, 91, 80, 84, 87, 86, 80, 78, 70, 76, 81, 89, 93, 97, 91, 95, 94, 88, 90, 52, 87, 86, 84, 94, 89, 87, 91, 83, 80, 82, 79, 92, 97, 92, 96, 96, 98, 96, 100, 76, 84, 81, 85, 85, 92, 94, 94, 96, 94, 93, 87, 77, 102, 100, 98, 89, 81, 77, 74, 78, 86, 92, 91, 104, 113, 97, 92, 76, 94, 89, 87, 82, 76, 77, 90, 99, 85, 86, 99, 105, 102, 98, 78, 89, 93, 90, 73, 58, 76, 93, 106, 102, 96, 91, 107, 105, 98, 71, 68, 81, 78, 79, 73, 76, 75, 73, 72, 70, 72, 74, 73, 69, 71, 68, 68, 69, 64, 61, 64, 63, 65, 72, 61, 59, 60, 59, 56, 59, 56, 53, 57, 55, 57, 56, 57, 57, 57, 59, 53, 55, 57, 56, 49, 30, 28, 32, 30, 32, 27, 29, 33, 34, 36, 34, 39, 38, 39, 39, 43, 42, 39, 40, 44, 43, 39, 42, 47, 50, 42, 44, 48, 50, 50, 48, 51, 51, 51, 50, 53, 54, 52, 55, 54, 54, 56, 52, 53, 53, 55, 57, 60, 56, 51, 56, 55, 53, 51, 55, 54, 59, 61, 62, 62, 61, 59, 60, 68, 67, 71, 68, 90, 103, 98, 77, 74, 70, 72, 53, 42, 51, 59, 81, 72, 79, 76, 106, 97, 98, 92, 78, 73, 77, 63, 57, 70, 59, 67, 88, 90, 91, 105, 99, 93, 82, 79, 81, 81, 67, 67, 68, 71, 66, 91, 87, 67, 74, 91, 94, 88, 88, 90, 93, 85, 78, 69, 76, 77, 89, 94, 96, 98, 98, 96, 87, 85, 50, 89, 85, 84, 89, 90, 89, 93, 88, 85, 82, 82, 93, 100, 96, 98, 101, 97, 95, 98, 69, 85, 84, 85, 89, 88, 94, 94, 98, 99, 96, 90, 74, 103, 103, 95, 90, 79, 73, 75, 81, 92, 91, 91, 108, 107, 94, 90, 79, 97, 92, 89, 89, 77, 77, 86, 101, 88, 87, 101, 117, 112, 94, 99, 90, 96, 92, 76, 62, 61, 62, 84, 84, 80, 76, 112, 106, 102, 69, 71, 84, 78, 74, 71, 79, 76, 76, 73, 72, 69, 72, 67, 66, 70, 65, 63, 76, 67, 67, 65, 62, 66, 70, 64, 61, 59, 59, 62, 60, 54, 55, 62, 61, 59, 58, 59, 55, 57, 58, 56, 55, 53, 52, 50, 27, 27, 29, 29, 26, 27, 24, 31, 33, 35, 36, 40, 37, 40, 39, 43, 41, 39, 42, 42, 45, 45, 46, 43, 42, 40, 47, 50, 47, 52, 48, 46, 50, 50, 54, 56, 49, 54, 56, 54, 52, 57, 56, 56, 55, 57, 54, 51, 50, 53, 58, 58, 57, 59, 60, 56, 56, 59, 66, 65, 59, 58, 64, 66, 63, 67, 64, 89, 107, 106, 78, 70, 72, 78, 63, 49, 50, 58, 80, 72, 81, 76, 103, 102, 99, 99, 72, 71, 74, 68, 67, 66, 64, 71, 93, 91, 79, 109, 97, 94, 83, 75, 85, 69, 79, 72, 64, 74, 66, 93, 94, 79, 69, 88, 97, 93, 88, 85, 95, 85, 71, 72, 76, 70, 75, 97, 95, 95, 94, 93, 89, 91, 81, 90, 83, 86, 90, 92, 85, 92, 94, 84, 77, 84, 90, 94, 102, 100, 92, 93, 96, 97, 73, 87, 82, 85, 91, 96, 94, 95, 96, 100, 94, 100, 91, 99, 104, 101, 87, 77, 70, 76, 80, 90, 91, 96, 104, 107, 98, 94, 77, 102, 91, 91, 87, 71, 73, 80, 94, 88, 87, 95, 128, 116, 94, 84, 90, 95, 91, 73, 60, 61, 60, 76, 80, 82, 82, 112, 104, 104, 69, 75, 83, 80, 77, 73, 74, 72, 75, 73, 75, 66, 68, 68, 64, 68, 65, 71, 73, 68, 69, 66, 66, 69, 70, 70, 66, 61, 62, 62, 61, 55, 55, 59, 60, 58, 59, 58, 56, 59, 56, 56, 58, 58, 50, 51, 24, 26, 27, 29, 32, 30, 31, 34, 34, 34, 36, 40, 38, 39, 33, 37, 40, 43, 47, 48, 43, 43, 47, 48, 47, 45, 52, 51, 49, 50, 50, 46, 48, 48, 53, 48, 49, 53, 55, 54, 52, 52, 50, 58, 53, 54, 53, 54, 52, 55, 59, 61, 63, 53, 56, 59, 62, 63, 66, 65, 61, 61, 66, 66, 62, 69, 60, 92, 110, 98, 75, 72, 72, 80, 64, 54, 54, 67, 81, 80, 78, 89, 108, 98, 101, 100, 85, 82, 80, 67, 59, 67, 64, 64, 94, 88, 68, 95, 93, 97, 84, 85, 77, 83, 81, 79, 77, 64, 65, 93, 93, 76, 67, 94, 96, 91, 86, 88, 95, 82, 73, 69, 75, 67, 78, 98, 96, 92, 92, 97, 94, 87, 67, 90, 90, 94, 91, 89, 91, 90, 91, 82, 86, 88, 95, 102, 99, 97, 96, 98, 97, 94, 71, 82, 84, 88, 87, 91, 99, 94, 96, 93, 86, 99, 84, 97, 100, 96, 86, 78, 73, 77, 79, 94, 94, 92, 110, 113, 95, 87, 78, 98, 93, 87, 80, 70, 74, 85, 96, 92, 91, 97, 102, 104, 99, 67, 91, 89, 88, 73, 63, 60, 63, 79, 82, 87, 77, 114, 104, 103, 78, 83, 84, 82, 81, 77, 67, 68, 72, 68, 74, 75, 78, 79, 74, 74, 68, 68, 65, 66, 67, 65, 66, 66, 67, 65, 66, 64, 64, 59, 60, 62, 50, 50, 60, 60, 60, 54, 58, 59, 58, 59, 62, 60, 57, 57, 24, 32, 28, 26, 30, 30, 32, 30, 34, 38, 39, 37, 38, 37, 36, 41, 44, 43, 43, 42, 44, 45, 45, 46, 48, 48, 51, 50, 46, 48, 50, 47, 47, 49, 52, 46, 51, 49, 55, 58, 56, 56, 54, 58, 55, 52, 56, 57, 51, 53, 54, 56, 59, 59, 59, 59, 62, 62, 62, 56, 60, 63, 64, 66, 66, 70, 65, 94, 107, 105, 82, 70, 71, 72, 60, 53, 48, 65, 75, 76, 74, 84, 103, 97, 102, 101, 91, 87, 79, 70, 63, 60, 63, 63, 93, 85, 73, 85, 105, 101, 87, 82, 85, 84, 72, 64, 61, 67, 64, 88, 95, 81, 62, 93, 92, 99, 84, 84, 90, 85, 74, 72, 74, 65, 81, 93, 92, 93, 93, 94, 96, 96, 62, 91, 81, 91, 93, 90, 90, 90, 83, 79, 78, 95, 98, 100, 101, 100, 94, 98, 96, 96, 67, 79, 82, 85, 93, 94, 101, 96, 98, 95, 90, 97, 76, 98, 95, 97, 84, 76, 74, 74, 84, 96, 95, 94, 111, 112, 93, 91, 91, 98, 103, 87, 83, 75, 74, 87, 98, 93, 91, 101, 104, 106, 100, 78, 94, 89, 91, 73, 65, 58, 63, 85, 85, 89, 85, 134, 112, 104, 76, 83, 87, 86, 80, 74, 73, 73, 73, 67, 73, 71, 76, 75, 71, 72, 71, 66, 69, 68, 68, 68, 68, 65, 67, 73, 70, 63, 57, 49, 64, 59, 54, 50, 52, 59, 59, 54, 60, 58, 59, 57, 55, 58, 61, 58, 23, 31, 34, 32, 29, 34, 33, 34, 36, 36, 37, 36, 39, 40, 40, 43, 45, 46, 44, 49, 49, 49, 49, 47, 41, 47, 48, 47, 45, 45, 45, 40, 45, 48, 53, 52, 51, 49, 53, 56, 53, 51, 47, 52, 55, 54, 59, 56, 52, 56, 59, 58, 56, 56, 57, 58, 63, 64, 64, 59, 64, 66, 68, 66, 67, 57, 63, 98, 109, 107, 86, 72, 71, 70, 63, 56, 53, 64, 66, 72, 56, 79, 94, 97, 98, 104, 85, 86, 82, 80, 74, 61, 57, 85, 103, 100, 91, 91, 103, 99, 90, 81, 85, 86, 73, 65, 69, 79, 73, 100, 92, 76, 68, 90, 93, 101, 87, 85, 88, 85, 73, 73, 69, 67, 84, 93, 94, 93, 88, 89, 95, 92, 77, 88, 85, 93, 98, 98, 90, 94, 86, 83, 76, 113, 105, 98, 101, 96, 95, 99, 95, 99, 65, 83, 78, 81, 91, 93, 96, 97, 97, 102, 92, 94, 84, 99, 96, 98, 86, 74, 75, 79, 88, 96, 98, 97, 116, 128, 91, 89, 82, 93, 98, 84, 85, 80, 80, 87, 96, 92, 92, 102, 106, 109, 98, 91, 96, 85, 86, 71, 66, 62, 65, 89, 89, 91, 90, 132, 111, 100, 68, 83, 81, 80, 78, 73, 77, 78, 74, 74, 80, 74, 70, 71, 70, 66, 67, 68, 66, 67, 65, 64, 65, 66, 66, 72, 68, 63, 62, 62, 60, 59, 57, 58, 56, 55, 60, 55, 59, 57, 58, 54, 52, 55, 57, 56, 26, 28, 32, 32, 28, 34, 34, 32, 33, 36, 40, 41, 41, 40, 44, 45, 45, 47, 46, 51, 49, 47, 51, 49, 45, 48, 48, 49, 50, 43, 44, 41, 44, 45, 49, 48, 49, 55, 51, 56, 60, 57, 49, 55, 54, 52, 55, 53, 54, 56, 59, 59, 56, 60, 58, 59, 57, 60, 61, 65, 66, 63, 69, 66, 67, 43, 58, 108, 111, 97, 85, 69, 69, 67, 67, 60, 55, 51, 50, 84, 48, 84, 91, 95, 100, 106, 93, 88, 83, 86, 71, 55, 58, 129, 109, 113, 115, 92, 95, 102, 102, 84, 82, 86, 72, 87, 137, 93, 78, 127, 96, 71, 67, 84, 91, 92, 92, 88, 92, 92, 71, 72, 66, 61, 83, 84, 91, 84, 75, 76, 81, 88, 76, 94, 97, 103, 103, 99, 93, 94, 85, 80, 81, 90, 94, 92, 98, 92, 91, 93, 84, 89, 70, 79, 78, 88, 93, 95, 96, 94, 101, 105, 97, 90, 79, 91, 93, 91, 82, 73, 77, 79, 86, 100, 100, 98, 117, 126, 88, 90, 81, 89, 93, 86, 80, 81, 82, 85, 92, 86, 90, 99, 111, 109, 91, 87, 91, 86, 81, 69, 65, 64, 63, 88, 87, 87, 89, 125, 106, 95, 64, 82, 81, 81, 78, 72, 76, 76, 73, 78, 83, 76, 69, 70, 69, 65, 65, 68, 64, 67, 64, 64, 65, 69, 67, 72, 68, 64, 61, 63, 60, 60, 60, 60, 60, 53, 62, 58, 57, 57, 60, 58, 57, 52, 53, 54, 28, 29, 31, 31, 30, 36, 38, 39, 35, 35, 44, 39, 41, 48, 52, 49, 46, 50, 50, 50, 54, 48, 49, 49, 44, 46, 47, 46, 48, 45, 43, 47, 46, 44, 42, 47, 50, 57, 50, 54, 60, 58, 52, 57, 52, 52, 53, 54, 56, 55, 58, 58, 54, 64, 61, 62, 57, 61, 60, 61, 65, 62, 73, 66, 64, 51, 59, 158, 183, 81, 114, 126, 123, 126, 83, 33, 18, 17, 35, 44, 42, 83, 84, 113, 105, 115, 102, 101, 95, 109, 66, 47, 50, 130, 99, 82, 100, 73, 91, 100, 104, 87, 91, 95, 105, 165, 208, 75, 72, 87, 74, 65, 61, 51, 68, 66, 91, 91, 97, 93, 60, 58, 48, 57, 83, 71, 78, 72, 69, 71, 73, 78, 66, 105, 97, 101, 104, 106, 105, 98, 87, 80, 79, 78, 85, 83, 84, 81, 72, 77, 71, 74, 68, 57, 68, 80, 94, 91, 93, 93, 96, 92, 92, 62, 75, 68, 72, 75, 74, 75, 80, 73, 83, 95, 97, 98, 118, 118, 90, 87, 76, 76, 85, 101, 84, 81, 82, 86, 93, 80, 87, 102, 110, 107, 89, 76, 72, 72, 68, 65, 63, 61, 60, 86, 87, 83, 84, 121, 102, 97, 67, 70, 73, 70, 70, 76, 75, 74, 71, 78, 78, 74, 69, 67, 66, 62, 64, 64, 73, 69, 65, 70, 68, 68, 68, 68, 63, 62, 59, 66, 59, 58, 60, 58, 60, 51, 62, 57, 55, 60, 63, 59, 56, 51, 52, 53, 28, 31, 36, 36, 40, 40, 32, 39, 39, 36, 39, 44, 46, 49, 47, 52, 56, 52, 51, 54, 51, 54, 54, 47, 43, 44, 46, 46, 46, 42, 39, 41, 43, 43, 41, 53, 56, 53, 53, 52, 54, 56, 54, 56, 50, 51, 57, 54, 53, 56, 63, 62, 57, 63, 61, 59, 64, 62, 60, 66, 65, 72, 81, 68, 56, 68, 74, 177, 207, 109, 209, 244, 233, 230, 87, 15, 8, 4, 35, 49, 38, 85, 84, 116, 126, 179, 164, 185, 146, 108, 46, 41, 48, 128, 90, 81, 98, 69, 96, 82, 97, 109, 123, 129, 170, 182, 75, 50, 76, 50, 57, 61, 52, 32, 52, 47, 87, 87, 90, 88, 45, 28, 28, 53, 77, 54, 67, 60, 63, 63, 69, 72, 83, 96, 96, 85, 99, 99, 103, 98, 86, 85, 83, 68, 77, 71, 72, 65, 66, 58, 64, 67, 72, 35, 41, 44, 77, 99, 98, 92, 97, 98, 69, 52, 75, 64, 66, 69, 65, 71, 156, 124, 99, 93, 92, 94, 120, 117, 72, 64, 68, 63, 75, 91, 72, 66, 77, 86, 93, 84, 97, 100, 104, 108, 92, 68, 54, 62, 56, 52, 67, 71, 69, 84, 82, 86, 90, 140, 109, 92, 65, 52, 56, 53, 50, 73, 72, 75, 74, 77, 76, 74, 73, 71, 72, 68, 66, 70, 68, 68, 67, 67, 61, 64, 69, 71, 70, 66, 66, 61, 59, 60, 54, 55, 61, 54, 56, 56, 59, 55, 62, 62, 56, 56, 55, 51, 31, 28, 37, 41, 38, 41, 34, 38, 38, 42, 44, 48, 50, 52, 53, 49, 51, 50, 51, 59, 55, 54, 55, 47, 46, 48, 42, 43, 49, 44, 48, 50, 43, 45, 40, 51, 51, 54, 56, 59, 57, 52, 55, 56, 52, 51, 58, 54, 52, 55, 56, 57, 57, 64, 65, 60, 60, 61, 62, 64, 62, 74, 71, 73, 67, 54, 61, 142, 191, 147, 240, 252, 251, 246, 92, 19, 8, 6, 38, 61, 50, 87, 145, 110, 121, 199, 226, 236, 178, 141, 40, 49, 26, 119, 89, 74, 90, 64, 85, 63, 82, 110, 130, 142, 113, 49, 22, 24, 76, 89, 98, 95, 56, 28, 48, 44, 78, 77, 79, 75, 24, 12, 15, 50, 81, 73, 95, 90, 69, 66, 66, 75, 77, 67, 94, 124, 179, 153, 152, 150, 74, 71, 69, 54, 92, 67, 61, 57, 51, 49, 49, 55, 68, 34, 29, 34, 59, 94, 99, 85, 92, 87, 47, 43, 77, 52, 54, 65, 50, 44, 164, 202, 119, 105, 103, 106, 112, 117, 30, 60, 71, 45, 66, 75, 57, 46, 55, 68, 99, 101, 103, 95, 92, 94, 89, 76, 47, 42, 62, 29, 25, 46, 64, 98, 93, 95, 103, 178, 122, 166, 79, 37, 50, 60, 54, 60, 78, 77, 79, 74, 70, 78, 76, 70, 73, 66, 67, 70, 68, 71, 65, 69, 70, 68, 67, 69, 71, 70, 64, 71, 66, 66, 63, 59, 59, 59, 57, 60, 62, 56, 54, 57, 59, 60, 62, 59, 36, 35, 38, 42, 36, 39, 42, 43, 39, 43, 48, 49, 51, 49, 56, 53, 57, 49, 50, 53, 59, 53, 50, 50, 47, 51, 46, 48, 49, 46, 50, 54, 54, 56, 46, 51, 48, 56, 51, 55, 55, 53, 58, 54, 56, 56, 63, 56, 47, 54, 55, 55, 57, 62, 63, 60, 56, 59, 63, 66, 64, 75, 71, 69, 78, 95, 97, 143, 191, 185, 226, 223, 229, 217, 85, 17, 1, 20, 63, 85, 81, 100, 126, 126, 147, 206, 226, 212, 199, 165, 88, 66, 4, 104, 97, 87, 82, 59, 37, 40, 48, 94, 88, 114, 48, 24, 18, 45, 88, 114, 112, 107, 56, 38, 55, 55, 67, 63, 74, 76, 28, 18, 22, 50, 104, 102, 126, 128, 112, 119, 123, 122, 77, 73, 83, 91, 200, 204, 206, 183, 68, 57, 59, 48, 136, 103, 101, 88, 82, 82, 81, 83, 72, 32, 18, 30, 46, 78, 81, 71, 78, 86, 47, 37, 90, 97, 97, 100, 62, 26, 43, 147, 151, 112, 121, 129, 124, 122, 22, 49, 63, 48, 61, 89, 73, 50, 39, 63, 213, 193, 204, 163, 80, 72, 109, 72, 35, 30, 43, 8, 4, 18, 169, 171, 182, 185, 172, 171, 166, 51, 19, 23, 30, 36, 49, 77, 83, 83, 77, 71, 73, 75, 75, 70, 65, 68, 66, 70, 69, 70, 68, 71, 69, 71, 72, 66, 72, 66, 69, 66, 64, 61, 58, 59, 60, 53, 53, 62, 59, 55, 59, 52, 56, 58, 57, 36, 42, 38, 40, 39, 39, 42, 41, 44, 45, 50, 50, 52, 47, 54, 55, 60, 54, 52, 57, 56, 54, 54, 50, 51, 50, 48, 51, 48, 52, 50, 50, 51, 53, 53, 50, 50, 57, 54, 56, 55, 57, 59, 59, 57, 56, 58, 58, 49, 54, 57, 58, 59, 65, 60, 60, 55, 58, 64, 70, 69, 77, 69, 83, 113, 121, 101, 109, 167, 191, 205, 199, 193, 178, 77, 16, 13, 10, 41, 84, 101, 102, 104, 104, 150, 156, 162, 170, 171, 165, 115, 26, 20, 6, 95, 111, 106, 89, 115, 53, 50, 49, 79, 68, 75, 54, 31, 34, 41, 77, 115, 113, 109, 58, 47, 63, 64, 67, 65, 74, 76, 39, 36, 44, 72, 134, 122, 128, 128, 127, 132, 136, 138, 100, 80, 82, 88, 200, 212, 217, 187, 85, 52, 50, 64, 140, 126, 127, 123, 121, 119, 117, 117, 91, 31, 23, 29, 40, 68, 67, 66, 73, 96, 53, 49, 106, 135, 134, 133, 75, 25, 24, 35, 83, 75, 87, 91, 108, 105, 26, 52, 85, 83, 88, 85, 52, 56, 44, 86, 221, 216, 225, 191, 87, 105, 132, 72, 47, 50, 52, 11, 1, 1, 20, 160, 153, 156, 167, 160, 169, 159, 50, 19, 18, 18, 41, 49, 70, 88, 79, 79, 79, 74, 77, 77, 71, 71, 71, 65, 68, 67, 72, 67, 72, 70, 75, 68, 64, 69, 69, 68, 63, 67, 60, 57, 61, 62, 55, 56, 62, 59, 56, 62, 56, 59, 57, 55, 35, 39, 35, 37, 40, 40, 42, 42, 46, 43, 49, 52, 56, 49, 53, 55, 53, 54, 53, 59, 53, 52, 53, 53, 54, 50, 48, 49, 49, 54, 51, 48, 50, 50, 54, 49, 52, 53, 55, 55, 54, 56, 58, 59, 57, 59, 55, 55, 55, 57, 58, 58, 57, 65, 62, 62, 62, 67, 66, 72, 71, 76, 66, 159, 211, 193, 166, 114, 114, 127, 122, 116, 121, 99, 88, 57, 26, 39, 77, 101, 110, 103, 117, 142, 153, 159, 164, 155, 164, 122, 30, 21, 13, 93, 121, 120, 98, 126, 93, 84, 103, 142, 114, 144, 129, 62, 55, 14, 62, 134, 134, 130, 77, 65, 75, 83, 81, 91, 92, 98, 63, 58, 65, 79, 127, 133, 136, 137, 133, 140, 147, 148, 122, 121, 104, 105, 212, 223, 218, 198, 85, 53, 68, 115, 161, 158, 161, 155, 158, 152, 145, 142, 110, 45, 34, 30, 45, 71, 69, 72, 84, 110, 70, 86, 103, 133, 134, 128, 81, 24, 30, 27, 45, 67, 75, 72, 97, 105, 41, 60, 108, 109, 113, 98, 36, 35, 54, 110, 222, 215, 222, 193, 116, 180, 169, 82, 87, 92, 85, 34, 1, 1, 25, 164, 155, 157, 172, 169, 173, 170, 68, 47, 56, 66, 86, 92, 61, 79, 81, 79, 80, 77, 79, 78, 76, 73, 71, 69, 70, 65, 73, 71, 75, 72, 72, 68, 72, 65, 66, 65, 64, 63, 53, 56, 64, 63, 59, 61, 62, 58, 52, 57, 58, 60, 59, 55, 41, 39, 41, 42, 43, 44, 43, 42, 49, 44, 46, 53, 57, 51, 52, 58, 52, 50, 52, 59, 48, 48, 53, 54, 56, 54, 52, 45, 46, 52, 48, 46, 48, 52, 55, 52, 53, 51, 58, 57, 51, 52, 56, 61, 55, 60, 57, 57, 54, 60, 62, 58, 53, 65, 62, 57, 63, 66, 70, 74, 74, 72, 93, 231, 254, 250, 242, 218, 201, 164, 128, 101, 70, 54, 70, 51, 24, 31, 77, 105, 108, 98, 115, 143, 156, 162, 168, 158, 178, 151, 65, 27, 46, 104, 129, 136, 96, 85, 120, 122, 139, 179, 174, 188, 153, 30, 13, 5, 82, 138, 133, 139, 94, 82, 91, 98, 99, 107, 103, 111, 77, 70, 65, 80, 153, 152, 151, 152, 152, 154, 159, 166, 137, 133, 137, 110, 208, 221, 217, 192, 87, 87, 120, 150, 168, 184, 186, 182, 179, 172, 173, 169, 109, 69, 59, 55, 80, 110, 103, 113, 112, 109, 92, 102, 124, 164, 159, 155, 97, 62, 48, 51, 70, 103, 108, 104, 108, 113, 68, 74, 123, 136, 137, 117, 25, 21, 37, 103, 246, 236, 246, 197, 106, 183, 160, 77, 110, 114, 107, 66, 14, 1, 35, 173, 165, 174, 179, 179, 190, 130, 64, 84, 98, 112, 108, 115, 55, 75, 82, 79, 83, 75, 79, 82, 77, 75, 68, 65, 68, 69, 72, 74, 74, 72, 70, 70, 73, 66, 69, 66, 65, 64, 57, 60, 64, 64, 64, 60, 66, 59, 56, 55, 55, 56, 62, 59, 37, 36, 43, 42, 42, 41, 47, 52, 54, 47, 43, 52, 56, 51, 50, 57, 55, 54, 48, 51, 50, 45, 47, 52, 52, 46, 51, 47, 51, 44, 44, 49, 50, 55, 57, 58, 55, 56, 56, 54, 49, 55, 57, 63, 56, 61, 57, 53, 52, 58, 59, 56, 54, 67, 63, 63, 72, 69, 74, 75, 76, 81, 140, 244, 214, 209, 231, 251, 254, 243, 249, 237, 203, 170, 120, 63, 46, 53, 79, 99, 97, 91, 80, 103, 139, 161, 178, 177, 194, 170, 77, 32, 55, 93, 126, 135, 113, 97, 121, 114, 133, 169, 183, 196, 146, 23, 7, 13, 10, 113, 137, 130, 129, 85, 87, 86, 97, 118, 121, 121, 121, 76, 74, 69, 79, 131, 137, 137, 141, 148, 151, 145, 151, 98, 73, 95, 150, 155, 183, 183, 168, 129, 81, 59, 80, 124, 153, 160, 154, 158, 154, 157, 156, 86, 77, 76, 75, 93, 129, 127, 127, 124, 122, 102, 94, 133, 164, 166, 164, 92, 84, 63, 72, 102, 112, 118, 115, 118, 125, 96, 98, 138, 158, 158, 142, 21, 5, 12, 80, 209, 217, 229, 182, 87, 166, 152, 82, 150, 144, 139, 108, 81, 37, 47, 187, 188, 191, 190, 196, 175, 80, 90, 110, 132, 143, 146, 115, 65, 66, 80, 83, 82, 84, 84, 80, 79, 73, 70, 68, 69, 68, 66, 73, 71, 71, 67, 74, 73, 69, 68, 68, 67, 69, 59, 62, 65, 62, 64, 62, 68, 58, 64, 60, 59, 58, 55, 56, 36, 32, 36, 40, 44, 37, 45, 48, 52, 52, 53, 56, 57, 59, 51, 50, 52, 54, 51, 52, 50, 47, 43, 51, 51, 50, 48, 49, 52, 48, 40, 48, 53, 57, 58, 56, 58, 57, 55, 54, 52, 53, 52, 53, 55, 61, 58, 60, 54, 58, 57, 52, 54, 61, 64, 68, 65, 67, 70, 79, 81, 88, 220, 222, 160, 155, 180, 188, 198, 206, 224, 235, 248, 248, 252, 241, 209, 154, 141, 126, 102, 90, 59, 58, 74, 76, 98, 130, 133, 74, 47, 33, 42, 72, 112, 128, 109, 103, 133, 138, 140, 177, 184, 195, 154, 57, 48, 72, 111, 130, 129, 135, 97, 141, 124, 104, 132, 136, 146, 149, 115, 105, 93, 86, 92, 127, 130, 130, 131, 134, 135, 132, 83, 79, 74, 181, 115, 156, 155, 141, 120, 80, 88, 78, 123, 142, 142, 147, 147, 152, 155, 149, 107, 78, 73, 76, 100, 150, 155, 147, 129, 107, 99, 103, 112, 151, 144, 144, 78, 73, 61, 64, 119, 151, 155, 154, 156, 138, 115, 119, 134, 143, 152, 135, 59, 12, 31, 100, 215, 217, 228, 182, 95, 169, 147, 113, 146, 130, 111, 83, 48, 29, 67, 120, 92, 78, 75, 78, 64, 67, 94, 143, 170, 204, 232, 244, 109, 51, 71, 87, 77, 74, 76, 77, 78, 75, 73, 78, 73, 77, 70, 73, 69, 74, 66, 69, 70, 70, 69, 69, 68, 69, 58, 64, 60, 63, 59, 58, 58, 55, 63, 58, 59, 54, 58, 51, 37, 39, 41, 44, 47, 49, 51, 56, 56, 53, 57, 57, 57, 62, 52, 51, 53, 50, 49, 52, 51, 49, 41, 47, 53, 51, 47, 48, 57, 53, 47, 51, 52, 54, 56, 51, 57, 57, 59, 59, 53, 55, 58, 56, 51, 57, 50, 54, 55, 58, 58, 60, 62, 66, 71, 66, 65, 71, 79, 86, 86, 115, 238, 178, 154, 168, 168, 175, 165, 165, 161, 175, 185, 198, 213, 235, 241, 251, 250, 233, 202, 173, 119, 78, 61, 48, 46, 53, 57, 42, 31, 24, 35, 69, 98, 104, 98, 93, 125, 133, 146, 186, 191, 200, 191, 145, 119, 99, 97, 127, 135, 133, 93, 140, 159, 123, 188, 197, 203, 200, 104, 70, 53, 42, 92, 126, 125, 124, 123, 124, 120, 118, 79, 71, 80, 137, 97, 123, 125, 128, 113, 74, 92, 108, 116, 125, 128, 136, 136, 135, 143, 144, 107, 80, 78, 77, 110, 170, 172, 172, 145, 108, 114, 132, 121, 137, 138, 140, 62, 49, 24, 30, 127, 192, 201, 200, 181, 145, 101, 89, 115, 134, 126, 118, 90, 54, 59, 153, 226, 223, 220, 163, 114, 157, 86, 86, 110, 113, 101, 51, 28, 23, 46, 83, 88, 105, 111, 130, 161, 186, 207, 242, 251, 249, 248, 250, 165, 62, 67, 79, 79, 73, 76, 72, 74, 73, 71, 74, 75, 76, 72, 75, 73, 73, 68, 68, 69, 69, 67, 64, 63, 63, 64, 63, 62, 65, 62, 58, 58, 57, 61, 56, 57, 55, 64, 54, 37, 45, 46, 46, 48, 56, 58, 61, 60, 54, 57, 58, 54, 65, 54, 53, 59, 54, 54, 49, 52, 48, 48, 45, 47, 48, 49, 49, 50, 54, 49, 51, 53, 53, 57, 55, 57, 55, 55, 55, 50, 53, 58, 58, 51, 57, 55, 55, 53, 58, 62, 59, 62, 65, 69, 70, 71, 70, 80, 85, 91, 174, 205, 155, 151, 164, 173, 171, 165, 155, 152, 159, 160, 154, 151, 167, 181, 216, 217, 236, 251, 246, 232, 209, 178, 146, 113, 77, 64, 42, 14, 17, 45, 68, 89, 91, 76, 47, 65, 87, 108, 155, 175, 186, 172, 120, 72, 61, 78, 120, 132, 131, 99, 133, 136, 101, 167, 187, 184, 179, 44, 9, 4, 12, 105, 130, 127, 124, 122, 120, 116, 108, 88, 70, 79, 73, 77, 95, 89, 95, 95, 77, 101, 140, 116, 119, 120, 126, 128, 129, 128, 137, 75, 73, 83, 86, 139, 196, 200, 213, 190, 162, 154, 121, 117, 135, 132, 135, 68, 40, 29, 26, 121, 186, 188, 186, 154, 133, 94, 80, 117, 129, 125, 108, 72, 55, 61, 126, 166, 169, 162, 105, 76, 75, 39, 60, 94, 110, 107, 83, 70, 97, 137, 167, 192, 224, 232, 241, 247, 232, 219, 230, 239, 245, 220, 200, 210, 85, 57, 77, 79, 77, 79, 76, 74, 72, 70, 69, 74, 73, 65, 69, 74, 69, 64, 66, 70, 74, 70, 67, 62, 60, 55, 59, 63, 61, 58, 58, 60, 59, 61, 58, 54, 56, 69, 61, 35, 44, 47, 46, 50, 56, 57, 59, 56, 54, 58, 63, 53, 62, 59, 56, 56, 53, 51, 50, 47, 52, 51, 48, 47, 49, 46, 48, 47, 54, 53, 55, 55, 53, 59, 56, 56, 58, 59, 58, 50, 53, 56, 54, 54, 58, 56, 54, 55, 61, 65, 58, 65, 67, 70, 69, 72, 72, 88, 79, 98, 175, 117, 138, 154, 154, 160, 163, 161, 154, 150, 153, 172, 168, 158, 152, 157, 160, 156, 178, 190, 204, 225, 239, 248, 246, 225, 204, 188, 141, 93, 74, 61, 63, 73, 78, 54, 24, 38, 53, 55, 73, 98, 101, 82, 58, 48, 50, 64, 110, 124, 121, 108, 136, 147, 87, 166, 177, 176, 172, 60, 22, 8, 19, 117, 129, 128, 125, 123, 116, 112, 105, 92, 74, 76, 75, 82, 91, 85, 93, 102, 96, 112, 141, 105, 114, 117, 118, 119, 123, 117, 128, 74, 46, 67, 75, 150, 241, 243, 248, 220, 158, 119, 94, 97, 140, 135, 130, 87, 57, 46, 45, 136, 199, 192, 188, 147, 130, 100, 94, 124, 123, 121, 98, 53, 35, 38, 59, 77, 83, 82, 49, 29, 34, 44, 92, 143, 163, 185, 199, 204, 219, 241, 241, 224, 212, 204, 191, 180, 146, 141, 165, 196, 210, 167, 133, 199, 137, 54, 81, 87, 82, 80, 76, 70, 71, 73, 68, 73, 74, 65, 65, 69, 66, 65, 70, 66, 71, 70, 65, 62, 61, 54, 55, 59, 61, 60, 59, 57, 58, 60, 61, 55, 59, 65, 62, 45, 51, 50, 47, 51, 54, 50, 55, 52, 53, 56, 62, 59, 58, 55, 53, 55, 57, 52, 47, 45, 52, 48, 51, 52, 51, 44, 49, 50, 52, 50, 54, 56, 56, 56, 53, 58, 60, 58, 59, 61, 61, 57, 54, 57, 61, 52, 56, 59, 63, 59, 54, 60, 64, 68, 64, 64, 71, 79, 77, 84, 80, 69, 104, 152, 152, 152, 148, 156, 137, 139, 124, 141, 145, 147, 155, 165, 155, 148, 140, 129, 128, 141, 160, 175, 194, 205, 212, 238, 242, 231, 211, 182, 160, 115, 88, 49, 20, 61, 42, 35, 61, 68, 69, 63, 70, 61, 49, 68, 104, 120, 121, 108, 136, 177, 101, 166, 182, 183, 181, 99, 62, 31, 55, 122, 129, 129, 127, 123, 112, 103, 104, 78, 82, 83, 82, 100, 95, 90, 104, 121, 113, 117, 122, 99, 109, 114, 115, 116, 115, 119, 122, 84, 38, 60, 73, 158, 254, 254, 251, 218, 104, 112, 98, 104, 146, 140, 121, 101, 82, 74, 84, 168, 232, 218, 204, 162, 156, 111, 86, 112, 122, 118, 102, 59, 28, 29, 34, 51, 72, 77, 76, 117, 159, 188, 218, 238, 243, 249, 252, 227, 201, 186, 164, 123, 115, 101, 104, 109, 97, 106, 119, 135, 136, 122, 107, 150, 201, 61, 83, 90, 84, 80, 75, 70, 75, 77, 73, 74, 75, 68, 66, 67, 63, 61, 69, 67, 70, 68, 68, 65, 63, 61, 61, 60, 63, 62, 57, 57, 62, 60, 60, 60, 58, 61, 60, 45, 51, 51, 52, 53, 56, 50, 57, 49, 52, 55, 56, 57, 50, 53, 58, 56, 53, 46, 46, 52, 51, 52, 53, 51, 52, 54, 53, 52, 52, 53, 57, 57, 53, 55, 56, 61, 58, 60, 60, 61, 56, 58, 59, 58, 61, 58, 63, 60, 65, 63, 61, 67, 62, 68, 67, 66, 65, 69, 72, 42, 25, 42, 78, 141, 132, 132, 129, 131, 108, 106, 93, 101, 110, 124, 142, 154, 154, 149, 137, 130, 120, 130, 125, 123, 122, 109, 114, 142, 171, 214, 245, 253, 252, 243, 244, 170, 78, 60, 46, 50, 54, 49, 58, 63, 51, 67, 69, 72, 99, 104, 103, 82, 62, 144, 99, 172, 207, 216, 207, 124, 75, 53, 71, 105, 124, 125, 123, 120, 109, 100, 101, 66, 76, 102, 86, 106, 112, 114, 118, 136, 100, 83, 63, 102, 106, 107, 111, 115, 114, 115, 123, 95, 42, 74, 97, 196, 254, 254, 247, 219, 98, 128, 104, 120, 142, 135, 119, 88, 56, 83, 175, 203, 246, 212, 189, 153, 135, 60, 54, 95, 106, 116, 99, 69, 43, 69, 103, 124, 187, 232, 248, 252, 253, 250, 248, 243, 202, 192, 200, 208, 196, 180, 97, 88, 103, 113, 118, 136, 119, 132, 119, 117, 125, 124, 118, 125, 228, 92, 73, 91, 83, 78, 75, 67, 69, 69, 73, 71, 76, 79, 71, 73, 67, 70, 66, 72, 68, 61, 65, 69, 63, 57, 64, 62, 66, 67, 60, 56, 61, 61, 59, 60, 54, 57, 58, 48, 55, 55, 56, 50, 50, 51, 59, 53, 56, 52, 50, 55, 51, 52, 57, 52, 52, 53, 46, 46, 49, 50, 52, 51, 58, 59, 53, 56, 56, 53, 55, 52, 52, 56, 56, 59, 58, 59, 57, 59, 57, 61, 61, 54, 55, 65, 62, 63, 64, 62, 61, 72, 63, 62, 58, 62, 68, 74, 65, 40, 34, 23, 53, 69, 63, 51, 57, 49, 40, 50, 58, 55, 54, 57, 68, 93, 93, 90, 86, 87, 90, 95, 93, 100, 94, 88, 87, 82, 87, 89, 120, 145, 162, 175, 176, 185, 140, 58, 62, 67, 58, 61, 57, 80, 75, 70, 75, 75, 91, 101, 89, 58, 30, 49, 106, 140, 142, 151, 144, 86, 48, 29, 41, 77, 110, 113, 114, 116, 106, 104, 100, 64, 50, 91, 66, 91, 109, 103, 111, 78, 63, 51, 67, 103, 112, 109, 110, 118, 118, 126, 125, 102, 61, 63, 89, 183, 246, 248, 243, 216, 123, 117, 88, 113, 133, 128, 115, 72, 49, 111, 207, 226, 233, 167, 97, 74, 47, 22, 41, 83, 113, 126, 157, 166, 187, 219, 253, 249, 247, 242, 236, 232, 223, 210, 201, 186, 155, 144, 186, 186, 224, 182, 107, 91, 83, 98, 108, 115, 120, 150, 124, 132, 148, 136, 145, 146, 188, 148, 70, 88, 82, 78, 82, 72, 73, 72, 76, 71, 72, 69, 71, 79, 69, 69, 69, 64, 66, 68, 70, 71, 67, 59, 59, 64, 62, 59, 62, 64, 60, 60, 59, 58, 56, 67, 61, 48, 48, 52, 54, 54, 49, 50, 58, 52, 56, 53, 57, 54, 54, 48, 53, 52, 49, 46, 44, 44, 48, 52, 52, 49, 50, 54, 58, 51, 53, 56, 59, 55, 53, 55, 54, 59, 57, 59, 59, 54, 64, 61, 56, 56, 57, 60, 61, 63, 61, 62, 63, 70, 57, 61, 63, 70, 67, 70, 51, 39, 30, 30, 52, 58, 45, 44, 40, 38, 48, 72, 68, 52, 46, 49, 55, 69, 63, 63, 64, 65, 80, 81, 84, 82, 78, 78, 77, 73, 74, 74, 71, 74, 68, 67, 79, 82, 71, 67, 77, 102, 94, 93, 70, 80, 84, 87, 76, 71, 91, 92, 85, 47, 44, 51, 99, 97, 68, 75, 69, 55, 43, 67, 137, 77, 103, 111, 110, 113, 106, 103, 100, 61, 55, 52, 60, 87, 93, 98, 91, 58, 50, 52, 63, 97, 116, 120, 120, 126, 126, 130, 120, 82, 60, 50, 74, 136, 211, 209, 189, 184, 95, 63, 62, 93, 120, 123, 111, 76, 51, 106, 167, 188, 176, 109, 83, 94, 56, 35, 48, 94, 200, 227, 237, 242, 242, 230, 222, 213, 194, 176, 166, 174, 164, 172, 175, 174, 173, 152, 158, 160, 173, 135, 111, 99, 99, 130, 149, 130, 135, 143, 121, 121, 124, 129, 129, 136, 94, 154, 76, 83, 81, 78, 78, 77, 79, 77, 76, 73, 71, 68, 72, 73, 73, 71, 68, 67, 68, 70, 67, 72, 67, 58, 65, 61, 58, 59, 61, 62, 62, 61, 60, 57, 60, 65, 57, 50, 47, 53, 55, 59, 54, 57, 56, 55, 59, 57, 56, 55, 55, 49, 51, 50, 51, 49, 50, 52, 53, 47, 53, 52, 53, 51, 58, 60, 57, 54, 56, 56, 56, 58, 59, 66, 65, 65, 62, 51, 60, 58, 59, 61, 61, 63, 65, 66, 62, 59, 62, 68, 59, 63, 68, 68, 66, 66, 51, 51, 37, 36, 69, 92, 89, 90, 86, 85, 92, 97, 91, 95, 93, 92, 94, 98, 94, 94, 90, 93, 98, 93, 99, 100, 99, 100, 95, 94, 90, 91, 88, 93, 92, 90, 93, 93, 94, 105, 102, 93, 99, 97, 96, 99, 91, 91, 89, 79, 87, 101, 86, 74, 68, 61, 84, 88, 74, 78, 94, 53, 41, 77, 194, 116, 105, 112, 116, 115, 107, 104, 103, 68, 62, 58, 62, 89, 93, 96, 93, 66, 63, 63, 76, 102, 120, 122, 122, 129, 132, 128, 118, 72, 68, 50, 68, 86, 130, 115, 110, 136, 67, 43, 54, 87, 121, 120, 108, 77, 50, 135, 224, 232, 211, 111, 87, 99, 81, 95, 79, 88, 143, 155, 151, 153, 146, 120, 101, 93, 80, 97, 87, 90, 87, 95, 107, 114, 125, 101, 102, 117, 118, 116, 138, 114, 155, 187, 210, 196, 149, 139, 111, 107, 101, 104, 99, 94, 38, 54, 67, 79, 80, 79, 82, 81, 79, 78, 78, 77, 71, 67, 72, 74, 74, 68, 68, 67, 69, 68, 62, 64, 64, 65, 65, 65, 64, 65, 65, 62, 59, 61, 61, 60, 62, 63, 59, 51, 51, 53, 53, 60, 53, 58, 58, 55, 54, 60, 55, 52, 52, 50, 47, 48, 54, 56, 55, 55, 57, 49, 50, 56, 64, 57, 55, 54, 59, 56, 54, 58, 57, 60, 61, 64, 61, 63, 63, 53, 59, 56, 56, 64, 66, 64, 63, 68, 66, 57, 59, 66, 65, 70, 72, 66, 64, 58, 59, 57, 51, 47, 79, 88, 87, 91, 92, 98, 98, 96, 96, 97, 95, 94, 90, 94, 98, 94, 92, 96, 93, 93, 97, 98, 102, 101, 96, 94, 91, 87, 88, 91, 93, 96, 98, 87, 90, 94, 97, 89, 98, 95, 99, 101, 100, 99, 98, 100, 103, 112, 107, 152, 132, 90, 78, 71, 72, 79, 101, 56, 43, 82, 189, 146, 103, 102, 101, 107, 107, 106, 105, 72, 64, 59, 59, 94, 94, 97, 95, 73, 71, 69, 87, 110, 126, 128, 129, 135, 136, 126, 118, 111, 175, 52, 77, 73, 94, 87, 103, 130, 85, 55, 71, 85, 121, 129, 117, 100, 86, 104, 137, 149, 145, 106, 88, 101, 103, 104, 101, 99, 99, 98, 93, 93, 91, 80, 75, 86, 74, 79, 73, 75, 74, 74, 73, 72, 74, 67, 73, 82, 83, 88, 103, 104, 133, 152, 175, 208, 156, 127, 110, 109, 92, 83, 71, 61, 19, 14, 37, 81, 80, 80, 85, 85, 77, 76, 78, 75, 70, 70, 72, 75, 75, 67, 67, 66, 66, 68, 65, 61, 64, 66, 64, 67, 69, 66, 65, 65, 62, 60, 59, 63, 61, 66, 61, 48, 49, 53, 56, 57, 56, 54, 56, 52, 53, 60, 53, 49, 49, 54, 48, 48, 51, 53, 49, 47, 54, 56, 52, 60, 59, 53, 56, 53, 56, 58, 55, 60, 58, 58, 60, 59, 53, 59, 61, 54, 59, 62, 57, 59, 62, 66, 65, 66, 66, 62, 64, 62, 67, 72, 69, 66, 65, 54, 54, 55, 63, 57, 57, 53, 62, 78, 78, 94, 96, 98, 90, 92, 88, 93, 94, 95, 93, 93, 90, 93, 98, 99, 103, 100, 98, 96, 91, 87, 92, 97, 81, 83, 89, 94, 88, 91, 91, 94, 96, 91, 94, 98, 95, 95, 94, 98, 103, 107, 103, 106, 109, 121, 129, 147, 181, 161, 147, 133, 123, 97, 127, 119, 234, 154, 101, 109, 112, 109, 104, 104, 102, 73, 64, 67, 71, 97, 103, 106, 98, 78, 79, 77, 91, 113, 129, 131, 130, 130, 129, 124, 106, 131, 159, 62, 76, 88, 101, 88, 98, 89, 90, 94, 144, 122, 137, 139, 118, 103, 101, 90, 90, 94, 98, 102, 97, 92, 97, 93, 105, 107, 101, 105, 95, 92, 101, 96, 98, 98, 98, 101, 96, 95, 94, 96, 98, 94, 92, 91, 87, 91, 85, 82, 75, 81, 93, 116, 114, 111, 106, 112, 102, 100, 86, 74, 73, 52, 14, 24, 21, 76, 77, 80, 84, 83, 76, 77, 76, 71, 69, 74, 72, 77, 77, 69, 66, 69, 66, 69, 64, 62, 61, 61, 63, 69, 71, 67, 63, 65, 65, 59, 54, 59, 57, 70, 59, 54, 54, 53, 53, 54, 61, 55, 55, 49, 56, 56, 46, 50, 45, 50, 48, 51, 50, 53, 49, 44, 45, 51, 55, 52, 57, 56, 60, 55, 57, 57, 58, 59, 61, 61, 55, 56, 55, 60, 58, 56, 61, 71, 64, 68, 67, 66, 73, 69, 68, 62, 65, 65, 70, 66, 61, 55, 55, 58, 51, 58, 58, 61, 53, 42, 35, 31, 34, 52, 63, 85, 88, 96, 97, 90, 100, 102, 100, 98, 98, 102, 105, 95, 95, 100, 101, 94, 92, 92, 100, 114, 100, 105, 106, 106, 101, 95, 94, 99, 95, 100, 98, 97, 90, 93, 95, 99, 102, 102, 101, 105, 97, 90, 94, 100, 102, 123, 160, 195, 200, 224, 248, 188, 213, 102, 116, 111, 109, 117, 118, 117, 117, 93, 83, 80, 85, 112, 118, 121, 111, 86, 87, 87, 96, 115, 129, 130, 125, 124, 123, 117, 118, 170, 191, 85, 97, 91, 142, 139, 164, 180, 174, 170, 165, 139, 115, 106, 104, 93, 115, 92, 88, 103, 99, 92, 105, 102, 103, 101, 98, 108, 104, 92, 91, 88, 93, 93, 92, 94, 94, 95, 103, 96, 93, 92, 99, 95, 92, 91, 86, 90, 87, 82, 94, 91, 95, 93, 93, 82, 77, 85, 91, 82, 88, 81, 82, 71, 36, 30, 28, 66, 74, 80, 80, 81, 77, 79, 76, 76, 73, 67, 69, 78, 76, 67, 69, 71, 66, 65, 61, 55, 59, 64, 58, 62, 61, 61, 57, 58, 56, 60, 66, 64, 59, 66, 54, 49, 51, 51, 51, 55, 54, 50, 53, 53, 54, 54, 51, 49, 44, 49, 47, 51, 46, 51, 45, 44, 48, 47, 51, 52, 60, 53, 57, 59, 53, 56, 60, 65, 62, 61, 58, 63, 63, 58, 59, 69, 68, 64, 64, 69, 65, 55, 62, 63, 63, 58, 66, 72, 65, 60, 61, 62, 62, 61, 48, 49, 50, 50, 49, 41, 39, 35, 31, 28, 32, 44, 46, 64, 86, 91, 106, 112, 109, 108, 108, 106, 108, 110, 108, 112, 112, 105, 102, 101, 98, 105, 116, 117, 123, 129, 123, 126, 114, 120, 117, 104, 99, 98, 99, 98, 100, 105, 111, 111, 109, 108, 114, 119, 113, 112, 113, 104, 98, 112, 129, 151, 169, 206, 238, 210, 210, 192, 166, 154, 149, 145, 142, 118, 103, 94, 95, 119, 119, 124, 121, 100, 96, 93, 102, 121, 135, 140, 144, 147, 155, 154, 155, 207, 239, 188, 210, 206, 200, 167, 150, 149, 124, 106, 106, 108, 115, 110, 103, 106, 110, 97, 98, 104, 103, 105, 95, 100, 93, 97, 93, 101, 97, 95, 90, 90, 93, 98, 100, 97, 97, 97, 100, 95, 94, 91, 97, 95, 94, 94, 91, 88, 88, 84, 88, 96, 96, 104, 100, 91, 90, 78, 90, 87, 83, 81, 89, 83, 52, 52, 56, 56, 67, 72, 72, 76, 76, 77, 75, 78, 75, 70, 70, 68, 71, 70, 71, 66, 66, 62, 66, 63, 63, 66, 62, 62, 57, 63, 58, 64, 59, 64, 62, 58, 57, 63, 52, 53, 49, 51, 48, 51, 54, 45, 46, 51, 47, 48, 49, 50, 46, 47, 49, 51, 46, 53, 56, 49, 53, 48, 53, 55, 58, 55, 55, 57, 55, 59, 55, 64, 61, 65, 61, 64, 70, 65, 62, 68, 66, 60, 65, 62, 63, 60, 63, 60, 58, 58, 63, 65, 63, 59, 62, 62, 67, 61, 52, 51, 52, 48, 43, 41, 39, 35, 40, 39, 39, 31, 36, 48, 52, 60, 76, 89, 101, 112, 119, 120, 119, 116, 122, 123, 120, 124, 126, 127, 121, 132, 143, 136, 153, 173, 156, 156, 135, 140, 151, 133, 121, 110, 113, 109, 113, 113, 122, 121, 119, 122, 121, 116, 116, 115, 123, 122, 118, 119, 123, 118, 129, 147, 163, 183, 199, 197, 197, 200, 210, 208, 208, 194, 180, 172, 174, 181, 184, 185, 179, 177, 176, 175, 184, 191, 201, 206, 216, 220, 223, 225, 214, 207, 199, 190, 158, 154, 143, 122, 122, 116, 111, 113, 117, 113, 120, 117, 109, 104, 105, 108, 112, 110, 117, 107, 107, 109, 109, 108, 108, 107, 100, 100, 99, 100, 100, 105, 106, 105, 109, 106, 99, 94, 92, 87, 91, 92, 94, 91, 86, 85, 92, 88, 96, 92, 97, 99, 97, 91, 89, 85, 88, 86, 79, 78, 78, 73, 67, 64, 72, 67, 64, 68, 69, 72, 71, 76, 75, 75, 72, 71, 74, 71, 71, 71, 70, 64, 69, 65, 71, 71, 63, 61, 64, 63, 58, 63, 59, 65, 63, 64, 58, 60, 62, 62, 55, 50, 45, 47, 45, 51, 54, 46, 44, 50, 45, 47, 49, 51, 54, 49, 50, 48, 49, 55, 53, 51, 56, 52, 57, 56, 54, 55, 54, 58, 57, 59, 58, 64, 64, 69, 67, 64, 62, 66, 63, 62, 61, 61, 66, 67, 62, 59, 63, 59, 58, 59, 62, 65, 65, 63, 66, 64, 65, 63, 54, 58, 55, 50, 47, 45, 45, 46, 46, 42, 41, 38, 45, 48, 52, 53, 54, 56, 64, 67, 82, 94, 108, 121, 134, 128, 125, 136, 145, 148, 143, 155, 171, 161, 170, 196, 190, 181, 145, 160, 183, 158, 150, 127, 127, 126, 132, 130, 135, 137, 133, 136, 141, 134, 132, 138, 138, 136, 137, 141, 140, 134, 136, 154, 146, 161, 165, 153, 150, 145, 161, 166, 175, 180, 179, 180, 187, 187, 195, 183, 185, 193, 195, 194, 196, 199, 202, 202, 207, 199, 197, 182, 176, 170, 159, 150, 145, 151, 142, 138, 137, 133, 134, 137, 138, 134, 135, 138, 138, 132, 132, 129, 134, 134, 127, 123, 122, 129, 127, 125, 128, 123, 120, 119, 112, 114, 114, 111, 108, 114, 120, 120, 112, 108, 103, 100, 100, 106, 104, 102, 98, 94, 94, 94, 109, 102, 95, 100, 86, 72, 66, 60, 57, 55, 62, 67, 70, 69, 72, 73, 65, 68, 69, 70, 74, 74, 71, 72, 75, 72, 75, 72, 71, 73, 70, 70, 71, 74, 72, 70, 73, 71, 70, 72, 66, 65, 64, 64, 62, 59, 64, 62, 59, 58, 62, 61, 58, 43, 41, 47, 48, 48, 51, 46, 45, 45, 44, 52, 53, 49, 52, 53, 52, 52, 55, 56, 56, 59, 61, 57, 57, 53, 55, 56, 58, 62, 59, 59, 62, 61, 65, 63, 68, 63, 63, 64, 60, 61, 60, 66, 65, 70, 60, 58, 59, 61, 64, 69, 70, 66, 68, 68, 65, 69, 67, 66, 61, 63, 63, 57, 54, 53, 56, 55, 51, 47, 45, 48, 46, 50, 54, 54, 56, 53, 51, 50, 51, 49, 57, 70, 91, 111, 129, 140, 153, 155, 162, 176, 193, 189, 179, 192, 198, 195, 178, 187, 204, 199, 173, 155, 141, 146, 150, 156, 155, 160, 165, 166, 163, 155, 154, 160, 162, 160, 158, 159, 161, 159, 163, 175, 159, 160, 160, 159, 157, 158, 169, 173, 173, 172, 166, 176, 174, 175, 177, 162, 164, 168, 173, 175, 181, 178, 183, 188, 190, 183, 178, 174, 176, 176, 167, 160, 158, 164, 154, 157, 156, 157, 159, 159, 157, 159, 167, 164, 160, 153, 150, 152, 152, 150, 146, 142, 143, 149, 148, 140, 139, 137, 136, 130, 127, 125, 121, 119, 116, 116, 121, 126, 119, 125, 124, 119, 118, 121, 126, 122, 118, 116, 109, 98, 103, 87, 66, 60, 52, 40, 40, 41, 47, 47, 56, 66, 63, 70, 68, 66, 63, 68, 66, 67, 71, 74, 71, 71, 73, 68, 76, 75, 73, 74, 76, 73, 66, 73, 74, 67, 71, 69, 70, 73, 63, 64, 65, 64, 66, 60, 66, 59, 63, 57, 62, 59, 56, 40, 44, 45, 49, 49, 46, 44, 50, 46, 46, 50, 50, 52, 51, 55, 56, 56, 54, 54, 55, 55, 58, 60, 64, 60, 60, 61, 61, 55, 59, 57, 57, 61, 68, 64, 64, 62, 66, 65, 61, 65, 62, 68, 67, 74, 64, 63, 65, 64, 65, 73, 72, 69, 66, 70, 67, 70, 70, 67, 62, 60, 71, 64, 60, 57, 60, 59, 52, 49, 46, 54, 48, 48, 53, 53, 51, 52, 48, 48, 47, 48, 45, 44, 51, 56, 62, 80, 108, 119, 148, 168, 181, 195, 186, 187, 192, 201, 219, 214, 209, 215, 219, 191, 168, 180, 189, 198, 193, 194, 204, 212, 211, 210, 209, 211, 211, 207, 204, 205, 214, 213, 216, 218, 213, 211, 210, 209, 211, 216, 221, 224, 225, 226, 223, 222, 218, 212, 204, 194, 189, 192, 191, 194, 195, 198, 197, 200, 199, 199, 194, 195, 202, 199, 184, 183, 194, 195, 202, 192, 188, 184, 182, 186, 174, 170, 177, 173, 174, 172, 173, 181, 176, 175, 163, 163, 158, 155, 154, 149, 144, 150, 146, 143, 141, 132, 135, 123, 121, 124, 126, 132, 128, 148, 143, 132, 138, 136, 134, 114, 98, 89, 76, 56, 49, 44, 35, 45, 43, 39, 44, 47, 47, 49, 54, 64, 60, 59, 62, 68, 66, 72, 69, 69, 69, 71, 70, 75, 69, 74, 72, 69, 72, 74, 74, 78, 66, 69, 74, 67, 70, 72, 67, 70, 62, 61, 62, 63, 67, 63, 63, 56, 62, 57, 64, 60, 56, 40, 44, 47, 48, 48, 43, 46, 50, 44, 47, 46, 50, 58, 54, 54, 51, 48, 49, 53, 58, 53, 53, 55, 55, 56, 62, 63, 62, 54, 60, 61, 62, 69, 62, 68, 63, 63, 66, 65, 62, 67, 65, 70, 67, 60, 57, 59, 67, 62, 63, 71, 68, 70, 69, 69, 70, 69, 71, 68, 70, 64, 71, 64, 62, 59, 61, 59, 55, 54, 49, 57, 53, 51, 54, 46, 49, 47, 46, 48, 48, 47, 45, 43, 46, 50, 51, 44, 50, 57, 78, 89, 116, 148, 167, 178, 178, 190, 246, 247, 242, 237, 252, 249, 239, 249, 245, 247, 248, 244, 241, 241, 244, 244, 246, 250, 255, 253, 254, 255, 255, 254, 254, 253, 252, 253, 252, 254, 255, 255, 253, 252, 251, 251, 251, 248, 250, 253, 247, 251, 246, 250, 247, 246, 244, 245, 245, 247, 243, 244, 242, 236, 238, 241, 237, 237, 241, 232, 228, 221, 224, 209, 196, 200, 202, 210, 204, 204, 193, 180, 179, 185, 184, 184, 173, 173, 175, 177, 176, 175, 174, 183, 168, 152, 156, 159, 159, 157, 165, 175, 162, 155, 153, 147, 135, 121, 114, 87, 73, 58, 50, 47, 48, 48, 47, 44, 38, 46, 47, 46, 45, 50, 49, 54, 52, 58, 56, 57, 63, 73, 74, 74, 74, 72, 72, 74, 70, 74, 66, 74, 73, 74, 75, 71, 74, 72, 64, 69, 65, 67, 61, 63, 63, 70, 70, 68, 61, 67, 66, 67, 57, 58, 60, 59, 61, 59, 60, 46, 43, 53, 45, 44, 44, 45, 52, 49, 47, 48, 50, 53, 52, 55, 55, 56, 53, 57, 54, 54, 55, 59, 54, 52, 61, 60, 59, 59, 61, 63, 59, 67, 59, 64, 60, 60, 65, 65, 65, 65, 67, 74, 68, 58, 62, 63, 64, 64, 66, 70, 66, 68, 73, 71, 75, 71, 74, 72, 75, 74, 74, 65, 66, 64, 63, 58, 63, 62, 56, 59, 62, 62, 53, 50, 49, 48, 47, 44, 45, 44, 43, 41, 48, 47, 46, 49, 57, 56, 56, 57, 59, 66, 76, 99, 114, 143, 222, 231, 245, 251, 248, 247, 249, 245, 246, 249, 253, 254, 249, 251, 250, 245, 254, 253, 251, 254, 253, 250, 248, 252, 251, 253, 250, 244, 252, 249, 248, 248, 249, 253, 253, 250, 250, 254, 253, 253, 250, 252, 254, 252, 252, 252, 254, 253, 254, 253, 251, 252, 253, 253, 251, 253, 253, 254, 255, 254, 249, 245, 250, 249, 249, 249, 240, 241, 238, 237, 233, 223, 217, 220, 212, 206, 201, 196, 193, 187, 182, 181, 176, 167, 169, 170, 176, 183, 178, 177, 178, 170, 148, 129, 112, 93, 67, 50, 46, 42, 47, 51, 48, 49, 54, 55, 50, 49, 47, 48, 55, 56, 51, 53, 54, 60, 60, 62, 60, 58, 67, 66, 70, 69, 72, 71, 72, 76, 73, 71, 73, 68, 72, 73, 76, 68, 72, 68, 67, 71, 69, 68, 67, 72, 69, 66, 67, 67, 64, 70, 65, 65, 58, 62, 65, 66, 61, 60, 62, 46, 45, 47, 42, 40, 45, 46, 51, 51, 45, 46, 50, 48, 52, 54, 53, 54, 54, 57, 62, 59, 62, 59, 57, 58, 58, 56, 58, 62, 61, 59, 59, 65, 66, 62, 68, 59, 65, 67, 68, 62, 67, 72, 61, 65, 70, 65, 66, 68, 71, 68, 68, 70, 68, 73, 80, 77, 78, 76, 72, 72, 75, 71, 72, 70, 70, 67, 66, 68, 64, 59, 63, 60, 58, 61, 59, 55, 55, 49, 51, 48, 44, 44, 47, 51, 51, 47, 55, 57, 51, 55, 53, 55, 56, 53, 48, 60, 101, 126, 165, 191, 202, 214, 213, 210, 203, 207, 224, 230, 229, 227, 230, 227, 244, 246, 243, 244, 245, 251, 250, 252, 254, 250, 254, 248, 254, 253, 250, 248, 253, 251, 254, 253, 254, 250, 252, 248, 253, 250, 252, 251, 251, 252, 252, 250, 252, 252, 252, 252, 249, 253, 254, 252, 249, 251, 254, 252, 253, 254, 254, 253, 254, 254, 253, 252, 251, 251, 253, 250, 252, 254, 252, 247, 246, 242, 236, 235, 231, 232, 227, 184, 158, 157, 148, 141, 128, 120, 104, 87, 77, 58, 42, 46, 46, 50, 46, 46, 49, 54, 50, 50, 52, 54, 50, 53, 50, 56, 56, 56, 58, 57, 66, 63, 67, 65, 63, 63, 68, 67, 69, 70, 75, 74, 74, 73, 72, 70, 74, 72, 72, 67, 69, 70, 69, 71, 71, 66, 69, 66, 68, 67, 68, 69, 68, 66, 66, 65, 64, 59, 63, 64, 65, 66, 61, 65, 63, 44, 45, 46, 42, 44, 47, 47, 48, 50, 46, 48, 50, 51, 50, 54, 54, 52, 53, 58, 57, 56, 60, 60, 59, 58, 53, 60, 62, 67, 63, 59, 67, 64, 64, 60, 68, 63, 64, 65, 67, 64, 64, 67, 63, 67, 72, 70, 66, 68, 73, 71, 71, 75, 72, 76, 83, 78, 76, 76, 77, 76, 79, 72, 73, 70, 72, 74, 70, 71, 68, 65, 67, 63, 63, 63, 64, 58, 56, 55, 54, 51, 48, 48, 48, 52, 52, 48, 50, 52, 52, 52, 49, 49, 51, 45, 46, 49, 48, 54, 63, 79, 100, 130, 145, 170, 150, 157, 159, 159, 166, 188, 206, 216, 221, 230, 212, 211, 222, 246, 240, 246, 253, 242, 251, 251, 247, 252, 250, 248, 254, 252, 253, 253, 255, 247, 252, 238, 234, 242, 251, 252, 251, 253, 239, 247, 253, 254, 241, 225, 227, 243, 255, 252, 253, 254, 254, 250, 254, 254, 255, 255, 252, 248, 238, 240, 240, 236, 237, 229, 218, 221, 218, 210, 211, 223, 234, 252, 247, 224, 208, 147, 109, 98, 94, 85, 68, 65, 61, 55, 55, 49, 51, 50, 49, 49, 53, 52, 48, 50, 47, 50, 50, 52, 52, 54, 51, 59, 59, 57, 59, 59, 71, 64, 66, 69, 68, 67, 68, 74, 69, 74, 81, 75, 71, 71, 68, 70, 72, 70, 75, 71, 68, 72, 72, 69, 76, 65, 70, 69, 68, 68, 68, 68, 68, 68, 63, 57, 65, 62, 66, 62, 59, 61, 60, 62, 58, 48, 41, 46, 46, 48, 49, 47, 49, 51, 50, 51, 50, 56, 48, 50, 52, 50, 54, 61, 56, 57, 57, 59, 56, 58, 56, 62, 57, 63, 62, 62, 64, 62, 64, 59, 59, 62, 63, 63, 66, 66, 69, 63, 71, 70, 68, 72, 67, 73, 77, 74, 73, 82, 78, 76, 84, 79, 77, 74, 77, 79, 84, 77, 74, 74, 76, 83, 76, 72, 72, 74, 73, 67, 64, 63, 69, 62, 61, 58, 61, 56, 52, 53, 54, 52, 53, 53, 50, 49, 54, 52, 47, 47, 48, 43, 47, 47, 51, 56, 53, 53, 53, 60, 70, 90, 96, 110, 111, 117, 119, 140, 151, 171, 197, 215, 210, 220, 221, 221, 220, 221, 232, 243, 253, 249, 245, 250, 255, 249, 242, 238, 227, 231, 230, 242, 234, 222, 196, 220, 252, 252, 249, 244, 224, 231, 246, 245, 218, 212, 191, 208, 229, 244, 254, 247, 249, 247, 244, 234, 245, 246, 231, 224, 225, 221, 219, 213, 217, 184, 169, 154, 165, 185, 181, 188, 189, 177, 149, 108, 86, 65, 64, 62, 61, 58, 54, 53, 57, 56, 54, 52, 51, 51, 51, 51, 54, 53, 47, 49, 51, 54, 54, 52, 58, 62, 57, 66, 63, 59, 64, 67, 70, 72, 70, 71, 71, 70, 68, 77, 73, 78, 82, 76, 71, 74, 70, 70, 74, 71, 76, 66, 73, 74, 72, 68, 73, 69, 73, 69, 69, 69, 66, 66, 65, 66, 65, 59, 66, 61, 66, 58, 55, 59, 57, 58, 57, 50, 43, 46, 45, 45, 48, 50, 56, 50, 49, 48, 50, 55, 49, 52, 52, 52, 55, 57, 53, 56, 58, 60, 65, 61, 64, 61, 55, 60, 59, 59, 55, 58, 61, 60, 59, 61, 63, 66, 72, 74, 80, 64, 64, 67, 67, 75, 73, 81, 82, 78, 76, 79, 80, 77, 81, 79, 79, 77, 76, 80, 80, 84, 77, 80, 79, 85, 83, 77, 78, 76, 76, 71, 77, 70, 70, 63, 61, 59, 65, 64, 62, 59, 60, 56, 58, 59, 55, 56, 53, 49, 48, 52, 49, 42, 45, 48, 52, 54, 51, 49, 53, 59, 55, 60, 66, 66, 71, 85, 85, 91, 101, 116, 141, 173, 207, 230, 227, 221, 215, 208, 208, 232, 247, 234, 239, 241, 238, 225, 207, 187, 172, 184, 195, 206, 211, 202, 197, 220, 253, 248, 252, 247, 232, 224, 253, 245, 231, 223, 197, 179, 183, 197, 217, 215, 204, 200, 212, 225, 248, 246, 212, 207, 188, 180, 152, 136, 157, 166, 154, 151, 149, 121, 110, 89, 69, 47, 47, 47, 50, 53, 50, 56, 56, 56, 53, 53, 55, 53, 53, 56, 54, 54, 50, 52, 54, 55, 55, 56, 54, 57, 60, 58, 62, 67, 64, 70, 65, 62, 67, 68, 65, 71, 74, 75, 74, 73, 70, 76, 74, 75, 80, 73, 69, 68, 70, 71, 78, 76, 78, 63, 70, 71, 71, 73, 72, 72, 70, 67, 69, 71, 68, 60, 64, 70, 68, 62, 67, 59, 64, 56, 56, 63, 57, 63, 63, 51, 49, 47, 44, 45, 46, 47, 54, 45, 48, 51, 50, 49, 48, 49, 53, 55, 55, 56, 57, 59, 57, 54, 57, 58, 59, 61, 62, 65, 58, 60, 55, 63, 61, 61, 63, 63, 62, 63, 67, 69, 66, 64, 64, 72, 72, 71, 73, 80, 78, 82, 79, 79, 76, 77, 76, 79, 79, 77, 78, 84, 79, 87, 79, 83, 77, 79, 82, 82, 79, 77, 79, 72, 72, 71, 70, 68, 62, 64, 65, 60, 62, 59, 56, 58, 60, 54, 53, 57, 55, 54, 46, 53, 52, 48, 47, 50, 54, 52, 46, 48, 55, 59, 57, 58, 70, 65, 61, 59, 57, 62, 59, 60, 70, 94, 123, 157, 161, 183, 191, 206, 213, 208, 204, 206, 203, 211, 212, 207, 194, 193, 178, 196, 220, 192, 216, 209, 216, 243, 254, 252, 251, 253, 247, 246, 252, 242, 254, 240, 230, 206, 191, 185, 182, 181, 199, 199, 220, 211, 218, 211, 167, 153, 138, 137, 118, 114, 126, 116, 90, 69, 65, 50, 44, 44, 50, 48, 54, 55, 47, 48, 48, 50, 47, 50, 51, 50, 53, 52, 49, 55, 55, 56, 52, 52, 58, 57, 59, 59, 54, 61, 65, 66, 70, 69, 69, 73, 72, 70, 70, 76, 74, 73, 74, 75, 74, 72, 73, 75, 78, 80, 78, 72, 78, 75, 75, 74, 79, 72, 74, 72, 71, 73, 73, 72, 66, 66, 68, 65, 62, 68, 63, 65, 65, 66, 69, 63, 66, 65, 65, 60, 53, 63, 61, 62, 57, 42, 44, 42, 44, 48, 48, 45, 49, 47, 52, 50, 48, 46, 50, 50, 51, 51, 51, 53, 52, 54, 55, 55, 57, 56, 56, 56, 60, 60, 59, 62, 59, 64, 64, 63, 64, 67, 65, 62, 71, 70, 68, 71, 73, 74, 75, 71, 75, 80, 77, 78, 73, 77, 71, 76, 73, 80, 81, 79, 80, 86, 81, 86, 83, 81, 78, 79, 77, 78, 76, 79, 80, 73, 72, 71, 68, 70, 67, 64, 65, 61, 59, 60, 61, 67, 67, 61, 61, 56, 52, 56, 52, 55, 55, 53, 49, 51, 53, 50, 47, 48, 50, 59, 57, 58, 66, 64, 64, 58, 56, 63, 60, 57, 54, 50, 49, 67, 80, 103, 114, 136, 168, 157, 151, 164, 149, 166, 172, 182, 181, 179, 176, 203, 233, 240, 241, 227, 228, 239, 232, 248, 249, 254, 251, 243, 221, 229, 244, 251, 234, 230, 192, 186, 185, 177, 196, 175, 180, 168, 149, 158, 110, 100, 78, 79, 74, 66, 56, 56, 59, 59, 53, 54, 49, 47, 43, 44, 41, 39, 46, 49, 50, 47, 46, 49, 49, 50, 53, 55, 52, 55, 58, 56, 62, 62, 60, 60, 61, 58, 53, 60, 62, 68, 74, 73, 75, 73, 71, 68, 70, 79, 74, 76, 74, 75, 78, 78, 76, 77, 84, 82, 78, 77, 84, 83, 78, 73, 77, 72, 76, 68, 75, 79, 74, 73, 69, 63, 66, 64, 68, 71, 68, 73, 68, 65, 69, 65, 64, 73, 59, 59, 58, 65, 67, 62, 54, 41, 43, 44, 49, 52, 49, 49, 48, 47, 50, 48, 47, 47, 51, 52, 50, 48, 49, 50, 56, 56, 56, 54, 54, 52, 56, 53, 59, 60, 58, 62, 59, 57, 61, 64, 67, 65, 63, 66, 73, 64, 68, 71, 75, 71, 74, 73, 75, 77, 72, 75, 72, 74, 74, 75, 75, 81, 80, 77, 76, 82, 81, 79, 79, 76, 76, 78, 76, 75, 75, 80, 76, 73, 71, 69, 69, 70, 72, 68, 64, 63, 61, 61, 64, 66, 65, 62, 66, 59, 56, 61, 55, 55, 56, 58, 55, 54, 53, 52, 51, 49, 51, 57, 52, 57, 57, 56, 58, 60, 57, 51, 60, 61, 55, 53, 50, 50, 56, 64, 55, 75, 99, 105, 105, 100, 98, 100, 97, 111, 120, 115, 117, 137, 206, 217, 182, 187, 178, 177, 187, 205, 229, 241, 224, 209, 188, 192, 203, 228, 209, 188, 124, 126, 132, 122, 124, 107, 111, 102, 88, 74, 63, 62, 61, 56, 56, 54, 57, 60, 55, 49, 50, 44, 41, 44, 43, 44, 45, 43, 38, 37, 48, 44, 45, 50, 50, 50, 52, 58, 56, 57, 61, 59, 66, 69, 61, 64, 63, 61, 60, 62, 60, 66, 74, 76, 78, 77, 73, 71, 73, 75, 75, 78, 80, 80, 77, 77, 74, 77, 80, 76, 81, 81, 80, 82, 81, 75, 75, 73, 73, 70, 74, 76, 73, 73, 69, 68, 69, 65, 67, 69, 69, 70, 65, 66, 65, 64, 63, 73, 61, 58, 57, 59, 63, 60, 54, 47, 45, 43, 46, 52, 45, 49, 46, 47, 47, 47, 51, 47, 49, 52, 54, 52, 51, 53, 57, 57, 56, 53, 52, 55, 58, 55, 59, 58, 60, 60, 62, 52, 58, 60, 63, 64, 66, 70, 69, 64, 64, 68, 69, 68, 69, 70, 73, 69, 70, 72, 72, 71, 76, 69, 78, 81, 80, 75, 71, 75, 81, 74, 76, 73, 77, 78, 73, 72, 75, 76, 72, 70, 68, 66, 70, 69, 72, 71, 64, 65, 68, 66, 68, 67, 65, 64, 66, 60, 57, 60, 57, 57, 60, 60, 59, 55, 53, 55, 55, 51, 51, 56, 51, 57, 55, 55, 59, 57, 50, 45, 46, 49, 50, 52, 52, 51, 53, 54, 49, 63, 72, 73, 78, 78, 84, 84, 87, 91, 89, 83, 77, 91, 152, 157, 119, 130, 120, 128, 148, 148, 173, 176, 162, 144, 129, 133, 143, 142, 124, 106, 85, 84, 85, 81, 74, 61, 57, 61, 57, 47, 56, 55, 56, 57, 53, 56, 55, 58, 50, 51, 55, 49, 46, 44, 49, 48, 41, 42, 38, 41, 43, 38, 44, 49, 47, 46, 53, 56, 56, 59, 65, 63, 70, 71, 66, 68, 67, 70, 70, 67, 64, 69, 79, 73, 76, 80, 79, 74, 76, 77, 82, 86, 84, 80, 77, 80, 77, 74, 74, 74, 81, 78, 75, 80, 75, 70, 73, 74, 74, 72, 72, 72, 70, 71, 73, 71, 68, 67, 66, 68, 65, 72, 66, 63, 61, 60, 60, 63, 64, 60, 56, 56, 57, 58, 59, 46, 43, 48, 46, 49, 47, 52, 49, 45, 48, 44, 46, 47, 51, 53, 52, 53, 51, 53, 58, 54, 55, 57, 56, 56, 57, 60, 60, 54, 58, 59, 57, 55, 58, 61, 67, 68, 71, 64, 67, 68, 66, 66, 64, 69, 61, 71, 71, 65, 73, 70, 68, 66, 70, 70, 77, 75, 75, 74, 68, 72, 78, 73, 74, 71, 75, 75, 74, 73, 74, 80, 74, 72, 69, 69, 69, 68, 67, 67, 68, 70, 69, 62, 63, 65, 63, 67, 69, 63, 65, 65, 59, 62, 63, 65, 57, 54, 59, 55, 55, 51, 59, 57, 59, 56, 53, 51, 55, 54, 49, 53, 44, 48, 46, 47, 46, 49, 53, 52, 33, 55, 66, 74, 76, 77, 76, 85, 88, 90, 89, 88, 86, 84, 96, 99, 94, 94, 94, 103, 106, 99, 106, 94, 98, 93, 91, 88, 88, 82, 82, 79, 78, 73, 75, 71, 67, 62, 56, 58, 52, 48, 53, 54, 53, 51, 46, 50, 54, 51, 50, 51, 53, 49, 51, 47, 50, 49, 46, 44, 43, 42, 42, 41, 46, 54, 50, 51, 56, 54, 56, 62, 68, 66, 69, 70, 71, 68, 72, 73, 73, 66, 67, 68, 76, 69, 70, 73, 77, 75, 75, 75, 79, 82, 82, 78, 76, 79, 74, 72, 73, 76, 75, 78, 75, 75, 72, 74, 75, 75, 70, 69, 74, 68, 71, 73, 73, 74, 67, 69, 69, 69, 64, 68, 62, 61, 67, 64, 63, 59, 66, 63, 62, 57, 54, 54, 60, 46, 45, 47, 45, 53, 45, 47, 47, 46, 48, 47, 44, 46, 50, 52, 52, 53, 53, 49, 50, 51, 53, 60, 56, 57, 59, 60, 57, 57, 65, 58, 55, 53, 55, 60, 72, 69, 62, 63, 64, 63, 73, 67, 69, 65, 62, 71, 75, 66, 70, 67, 66, 67, 66, 70, 71, 72, 69, 74, 71, 74, 75, 75, 76, 70, 68, 74, 74, 71, 73, 78, 73, 81, 74, 70, 71, 70, 73, 64, 75, 75, 71, 68, 71, 70, 65, 69, 70, 71, 69, 66, 67, 64, 58, 60, 61, 58, 59, 56, 57, 50, 57, 54, 50, 56, 52, 51, 57, 59, 57, 51, 44, 44, 40, 42, 47, 48, 48, 46, 39, 51, 62, 67, 65, 71, 73, 80, 82, 82, 83, 82, 86, 88, 88, 89, 88, 84, 88, 94, 92, 85, 86, 88, 90, 86, 85, 85, 76, 76, 80, 79, 77, 71, 72, 70, 68, 63, 54, 53, 50, 44, 42, 50, 48, 47, 45, 47, 52, 47, 47, 45, 49, 45, 51, 52, 54, 52, 49, 49, 49, 48, 45, 49, 52, 54, 55, 58, 58, 60, 60, 60, 66, 68, 69, 74, 72, 71, 78, 76, 75, 70, 76, 78, 78, 71, 71, 72, 76, 79, 76, 73, 77, 74, 79, 77, 85, 78, 69, 74, 74, 75, 71, 78, 78, 78, 70, 70, 69, 71, 69, 73, 74, 73, 76, 70, 68, 73, 65, 66, 72, 68, 59, 64, 61, 65, 65, 63, 64, 61, 61, 62, 61, 59, 54, 62, 63, 40, 46, 50, 45, 48, 50, 51, 47, 48, 48, 51, 51, 54, 53, 58, 59, 55, 55, 52, 49, 49, 52, 58, 60, 59, 59, 56, 59, 60, 60, 56, 63, 59, 63, 70, 67, 61, 59, 60, 61, 62, 67, 63, 70, 62, 67, 70, 65, 66, 68, 70, 68, 70, 69, 69, 68, 75, 71, 72, 70, 73, 78, 72, 68, 69, 71, 72, 72, 70, 75, 75, 74, 80, 72, 67, 70, 69, 74, 66, 69, 68, 69, 68, 73, 70, 68, 71, 67, 70, 66, 64, 69, 66, 62, 61, 62, 63, 67, 61, 59, 55, 58, 59, 55, 56, 55, 55, 55, 56, 50, 41, 43, 42, 41, 42, 43, 45, 49, 52, 54, 57, 59, 60, 60, 61, 63, 67, 70, 67, 71, 69, 75, 80, 81, 78, 76, 73, 79, 83, 80, 83, 79, 84, 76, 73, 73, 76, 70, 70, 73, 72, 68, 65, 61, 58, 58, 53, 45, 46, 45, 41, 39, 48, 42, 45, 47, 49, 55, 46, 46, 46, 50, 47, 55, 55, 54, 49, 49, 53, 53, 53, 49, 46, 52, 52, 59, 56, 61, 58, 61, 64, 68, 74, 73, 79, 75, 74, 78, 76, 75, 71, 73, 77, 77, 75, 78, 78, 74, 73, 74, 79, 82, 77, 83, 80, 80, 74, 70, 73, 71, 76, 73, 78, 76, 76, 69, 68, 66, 65, 63, 70, 68, 70, 74, 71, 69, 66, 63, 66, 69, 67, 64, 69, 63, 65, 59, 65, 66, 67, 58, 64, 62, 61, 55, 57, 56, 48, 46, 49, 49, 52, 50, 57, 49, 48, 51, 53, 49, 53, 51, 56, 58, 55, 55, 54, 57, 54, 55, 59, 64, 61, 61, 56, 64, 61, 63, 62, 62, 58, 66, 64, 55, 59, 65, 61, 59, 64, 62, 64, 70, 64, 68, 70, 61, 64, 71, 71, 71, 72, 70, 70, 73, 69, 67, 69, 69, 71, 76, 77, 72, 74, 75, 71, 70, 72, 75, 73, 73, 73, 72, 76, 76, 71, 72, 75, 74, 76, 81, 78, 79, 73, 71, 72, 65, 64, 62, 63, 65, 65, 64, 60, 58, 60, 63, 60, 58, 56, 59, 54, 58, 55, 55, 55, 55, 57, 52, 42, 43, 41, 43, 44, 49, 47, 49, 56, 56, 53, 55, 58, 57, 54, 58, 61, 66, 68, 70, 65, 68, 68, 69, 69, 70, 69, 75, 76, 65, 71, 69, 73, 66, 69, 68, 67, 63, 60, 65, 64, 60, 60, 56, 55, 53, 51, 46, 48, 45, 43, 41, 43, 40, 40, 41, 44, 49, 46, 49, 45, 51, 49, 48, 52, 54, 55, 56, 54, 50, 52, 51, 49, 53, 53, 62, 58, 65, 62, 62, 63, 64, 71, 69, 74, 75, 76, 73, 73, 74, 71, 74, 78, 77, 76, 76, 74, 73, 72, 73, 72, 76, 80, 78, 79, 74, 72, 66, 73, 72, 71, 72, 78, 78, 78, 69, 68, 69, 68, 66, 68, 69, 69, 67, 65, 70, 64, 64, 65, 68, 66, 63, 65, 63, 62, 59, 68, 67, 68, 60, 65, 64, 60, 54, 58, 58, 50, 51, 49, 47, 50, 56, 60, 53, 49, 54, 56, 49, 53, 56, 58, 58, 60, 58, 56, 59, 59, 60, 60, 61, 60, 58, 61, 65, 62, 61, 63, 62, 65, 63, 57, 55, 59, 59, 61, 56, 62, 61, 62, 67, 71, 64, 66, 66, 64, 67, 62, 64, 67, 69, 67, 78, 69, 71, 67, 73, 73, 75, 75, 71, 69, 73, 72, 69, 73, 73, 74, 73, 77, 72, 75, 76, 77, 74, 80, 79, 79, 79, 77, 77, 72, 72, 71, 70, 66, 66, 65, 71, 67, 65, 63, 61, 63, 61, 60, 59, 57, 57, 57, 56, 55, 53, 52, 52, 55, 51, 48, 46, 43, 45, 44, 49, 48, 46, 54, 55, 49, 55, 57, 57, 58, 59, 61, 65, 66, 70, 67, 68, 67, 64, 68, 68, 67, 71, 74, 65, 66, 64, 69, 60, 62, 62, 62, 61, 58, 63, 62, 59, 62, 57, 54, 53, 50, 47, 46, 45, 46, 45, 46, 43, 41, 41, 42, 45, 44, 45, 41, 47, 50, 51, 54, 53, 54, 55, 53, 50, 52, 55, 55, 54, 53, 60, 59, 58, 63, 64, 64, 65, 70, 68, 71, 75, 75, 66, 68, 71, 70, 71, 73, 73, 74, 78, 75, 72, 70, 71, 70, 76, 80, 74, 76, 74, 73, 70, 66, 69, 71, 70, 74, 74, 73, 71, 70, 69, 68, 67, 64, 68, 69, 70, 66, 68, 68, 66, 64, 69, 66, 67, 66, 65, 62, 65, 66, 65, 62, 60, 64, 64, 59, 56, 64, 62, 52, 57, 52, 48, 49, 56, 56, 52, 52, 54, 53, 52, 56, 59, 61, 59, 57, 57, 56, 57, 60, 61, 60, 57, 56, 56, 62, 62, 63, 61, 66, 65, 62, 51, 58, 59, 57, 64, 60, 63, 66, 64, 60, 67, 75, 67, 65, 67, 65, 66, 64, 66, 65, 70, 66, 74, 67, 70, 66, 73, 72, 75, 75, 68, 65, 74, 70, 69, 70, 70, 76, 76, 75, 74, 78, 76, 74, 68, 76, 75, 75, 75, 75, 74, 69, 70, 70, 73, 66, 67, 70, 68, 68, 67, 66, 65, 67, 65, 60, 57, 58, 59, 60, 52, 55, 53, 51, 52, 54, 50, 46, 46, 47, 48, 44, 47, 48, 47, 52, 55, 53, 53, 52, 58, 59, 56, 61, 63, 64, 66, 64, 64, 66, 60, 69, 67, 65, 67, 70, 66, 66, 68, 69, 60, 62, 62, 63, 60, 58, 64, 62, 61, 60, 59, 57, 54, 52, 49, 49, 48, 49, 47, 46, 45, 43, 44, 46, 46, 50, 48, 47, 52, 55, 51, 55, 55, 57, 56, 54, 55, 54, 58, 57, 56, 59, 62, 63, 63, 62, 62, 67, 65, 71, 70, 71, 69, 70, 66, 68, 70, 70, 69, 70, 75, 76, 78, 77, 71, 69, 71, 77, 73, 70, 77, 78, 73, 76, 68, 65, 68, 70, 66, 71, 74, 74, 71, 70, 67, 67, 67, 69, 69, 68, 73, 70, 68, 66, 66, 66, 67, 67, 67, 62, 66, 67, 66, 63, 65, 62, 59, 61, 62, 61, 57, 60, 58, 58, 55, 50, 51, 55, 59, 57, 49, 52, 53, 51, 51, 54, 58, 56, 57, 54, 60, 58, 60, 58, 61, 59, 59, 56, 63, 58, 60, 60, 61, 64, 66, 54, 55, 56, 58, 64, 68, 58, 69, 63, 64, 62, 72, 70, 69, 67, 66, 67, 64, 66, 65, 64, 68, 66, 70, 71, 71, 66, 73, 70, 72, 69, 67, 62, 69, 71, 73, 67, 67, 75, 75, 73, 72, 74, 75, 68, 65, 70, 73, 75, 74, 73, 71, 65, 68, 66, 70, 66, 66, 71, 64, 69, 66, 67, 66, 65, 62, 62, 59, 57, 59, 58, 60, 56, 60, 58, 57, 59, 53, 48, 48, 46, 49, 50, 50, 48, 49, 53, 57, 54, 58, 56, 60, 59, 57, 62, 62, 61, 59, 62, 61, 61, 59, 68, 61, 59, 61, 65, 70, 66, 73, 61, 64, 65, 63, 64, 61, 58, 65, 62, 60, 58, 59, 57, 55, 55, 52, 51, 48, 51, 52, 49, 51, 47, 47, 49, 49, 52, 51, 53, 55, 57, 56, 59, 55, 62, 60, 58, 62, 57, 62, 65, 62, 61, 63, 69, 65, 67, 65, 66, 66, 75, 72, 74, 68, 69, 66, 69, 68, 67, 69, 67, 72, 73, 77, 76, 69, 71, 71, 77, 67, 68, 75, 77, 76, 76, 66, 70, 70, 69, 64, 67, 73, 73, 70, 73, 72, 71, 68, 69, 68, 68, 69, 67, 68, 65, 62, 64, 68, 66, 64, 60, 65, 69, 59, 62, 66, 66, 61, 61, 60, 63, 57, 61, 55, 51, 51, 47, 50, 48, 47, 47, 56, 54, 55, 57, 54, 56, 54, 56, 57, 54, 51, 56, 66, 64, 60, 60, 61, 57, 61, 59, 58, 62, 65, 69, 56, 60, 57, 62, 63, 67, 62, 63, 67, 67, 64, 68, 71, 63, 64, 64, 63, 68, 63, 63, 65, 68, 66, 70, 67, 69, 66, 70, 67, 65, 71, 71, 68, 68, 70, 73, 73, 72, 68, 70, 74, 75, 78, 71, 73, 67, 68, 71, 81, 69, 70, 70, 67, 68, 69, 65, 73, 66, 71, 72, 67, 70, 67, 70, 66, 66, 65, 66, 59, 60, 58, 66, 66, 68, 58, 58, 54, 56, 54, 55, 56, 42, 49, 54, 55, 54, 52, 54, 56, 53, 58, 60, 60, 59, 59, 63, 60, 58, 63, 66, 64, 66, 62, 64, 63, 62, 61, 67, 69, 68, 65, 64, 63, 64, 63, 60, 62, 62, 60, 61, 58, 58, 59, 58, 55, 57, 51, 50, 55, 55, 54, 51, 53, 58, 50, 51, 56, 49, 50, 54, 62, 61, 59, 62, 62, 65, 62, 58, 67, 63, 64, 68, 68, 65, 67, 65, 65, 63, 65, 65, 69, 68, 74, 74, 73, 70, 68, 74, 74, 74, 71, 72, 72, 70, 71, 71, 69, 66, 68, 64, 66, 69, 73, 75, 71, 75, 67, 73, 71, 67, 68, 69, 69, 71, 70, 74, 73, 61, 66, 69, 68, 67, 69, 67, 62, 67, 68, 58, 66, 64, 58, 60, 63, 66, 67, 61, 60, 59, 63, 64, 63, 65, 55, 55, 51, 55, 59, 56, 57, 51, 51, 54, 61, 54, 54, 63, 58, 58, 58, 61, 61, 60, 58, 61, 65, 66, 66, 65, 63, 61, 63, 63, 62, 64, 68, 57, 54, 62, 61, 64, 65, 61, 61, 67, 67, 63, 67, 69, 67, 63, 63, 66, 67, 62, 64, 67, 63, 70, 69, 74, 72, 71, 68, 68, 74, 67, 67, 72, 71, 68, 66, 70, 69, 72, 73, 74, 71, 73, 76, 71, 68, 68, 73, 72, 67, 65, 71, 72, 67, 70, 65, 68, 71, 65, 69, 72, 72, 70, 71, 68, 69, 69, 68, 64, 60, 65, 61, 64, 62, 64, 56, 56, 61, 61, 54, 59, 61, 54, 56, 59, 54, 59, 59, 56, 56, 59, 59, 56, 56, 59, 61, 65, 61, 59, 66, 66, 62, 65, 64, 68, 63, 61, 60, 62, 65, 68, 62, 64, 67, 63, 62, 66, 65, 65, 63, 62, 57, 56, 59, 60, 59, 58, 53, 60, 55, 54, 58, 54, 59, 57, 56, 56, 58, 54, 55, 56, 59, 58, 62, 62, 64, 60, 65, 64, 65, 65, 65, 63, 65, 70, 71, 70, 73, 71, 70, 70, 72, 67, 72, 74, 73, 66, 72, 73, 69, 69, 72, 78, 71, 71, 72, 69, 70, 69, 69, 67, 68, 70, 74, 76, 75, 74, 74, 71, 65, 68, 68, 72, 69, 68, 70, 74, 77, 67, 67, 66, 66, 68, 67, 64, 64, 61, 65, 63, 64, 66, 58, 59, 60, 62, 67, 66, 64, 61, 58, 63, 58, 63, 57, 53, 54, 50, 54, 54, 57, 55, 57, 55, 56, 57, 60, 64, 58, 55, 57, 56, 59, 62, 60, 62, 65, 64, 66, 65, 68, 67, 68, 62, 62, 59, 60, 55, 55, 61, 62, 62, 64, 66, 63, 67, 69, 64, 66, 65, 69, 69, 66, 69, 69, 66, 61, 65, 63, 67, 67, 70, 68, 70, 71, 73, 75, 73, 69, 66, 70, 70, 68, 68, 68, 71, 72, 74, 70, 73, 74, 71, 69, 73, 76, 73, 64, 67, 71, 73, 70, 69, 63, 69, 69, 69, 68, 70, 70, 71, 71, 70, 67, 64, 67, 67, 65, 65, 62, 66, 67, 65, 60, 61, 63, 62, 61, 61, 62, 66, 63, 61, 60, 61, 63, 60, 61, 56, 62, 65, 61, 59, 62, 63, 59, 61, 61, 63, 64, 62, 64, 67, 63, 62, 64, 67, 69, 71, 64, 64, 62, 65, 62, 65, 65, 66, 62, 65, 62, 61, 61, 62, 62, 59, 54, 58, 56, 62, 62, 58, 57, 59, 60, 55, 59, 61, 60, 62, 63, 61, 66, 63, 65, 60, 66, 66, 69, 66, 65, 66, 67, 67, 68, 71, 74, 71, 73, 74, 69, 74, 76, 70, 73, 73, 73, 71, 72, 65, 69, 75, 70, 73, 76, 71, 71, 71, 71, 67, 69, 73, 74, 72, 71, 71, 73, 79, 71, 70, 74, 74, 69, 72, 72, 75, 78, 74, 73, 67, 69, 70, 63, 64, 67, 63, 67, 66, 63, 64, 58, 59, 60, 64, 67, 62, 60, 62, 62, 61, 55, 63, 58, 56, 57, 50, 58, 56, 57, 54, 54, 55, 61, 62, 59, 60, 56, 54, 59, 59, 57, 59, 63, 63, 64, 63, 62, 62, 66, 64, 68, 66, 68, 58, 60, 58, 55, 65, 65, 63, 61, 66, 64, 67, 64, 66, 67, 62, 65, 68, 66, 69, 67, 67, 69, 66, 62, 67, 68, 71, 73, 71, 68, 70, 67, 70, 73, 65, 69, 68, 70, 70, 72, 75, 74, 71, 68, 71, 72, 72, 72, 74, 76, 70, 65, 68, 70, 70, 69, 69, 66, 71, 70, 68, 70, 72, 71, 68, 72, 69, 65, 65, 64, 67, 68, 66, 64, 65, 66, 64, 60, 61, 66, 66, 65, 67, 65, 69, 66, 61, 61, 67, 65, 59, 67, 64, 64, 67, 63, 62, 63, 68, 62, 61, 63, 62, 61, 63, 67, 69, 65, 63, 65, 68, 69, 71, 68, 69, 61, 64, 64, 65, 65, 62, 64, 66, 63, 65, 63, 63, 66, 63, 59, 61, 62, 66, 60, 58, 56, 59, 61, 60, 57, 63, 59, 62, 62, 65, 70, 65, 63, 64, 67, 66, 71, 64, 61, 64, 69, 66, 69, 68, 68, 71, 70, 71, 70, 71, 73, 71, 73, 74, 67, 70, 72, 73, 72, 73, 72, 71, 74, 72, 72, 74, 73, 68, 66, 72, 74, 71, 70, 68, 69, 73, 68, 64, 71, 72, 69, 72, 69, 72, 72, 71, 68, 69, 66, 62, 64, 59, 66, 69, 67, 64, 62, 67, 62, 62, 60, 65, 64, 60, 59, 59, 64, 59, 55, 63, 56, 52, 57, 55, 57, 52, 56, 59, 57, 56, 59, 63, 58, 57, 57, 55, 62, 66, 62, 59, 60, 61, 64, 65, 60, 63, 66, 61, 65, 63, 61, 64, 53, 59, 63, 66, 63, 63, 59, 60, 62, 66, 63, 70, 63, 59, 63, 63, 62, 66, 66, 62, 68, 68, 67, 66, 67, 71, 73, 72, 68, 70, 67, 66, 66, 65, 67, 64, 69, 70, 73, 75, 75, 70, 70, 70, 70, 70, 72, 71, 73, 74, 69, 68, 71, 72, 70, 73, 72, 70, 70, 66, 71, 72, 74, 65, 69, 68, 69, 67, 68, 67, 67, 65, 67, 68, 66, 67, 67, 66, 64, 63, 63, 63, 63, 66, 65, 64, 67, 64, 64, 64, 63, 64, 68, 68, 67, 68, 67, 67, 67, 64, 62, 65, 62, 63, 68, 68, 68, 65, 66, 69, 65, 69, 68, 69, 64, 63, 66, 64, 65, 59, 61, 65, 65, 67, 67, 62, 64, 63, 62, 62, 62, 65, 61, 61, 63, 62, 62, 64, 58, 63, 64, 64, 62, 70, 69, 68, 63, 71, 65, 64, 67, 68, 65, 64, 65, 68, 69, 69, 70, 71, 70, 73, 74, 76, 72, 71, 72, 76, 69, 78, 73, 78, 73, 73, 74, 71, 73, 70, 74, 74, 66, 67, 72, 73, 74, 73, 72, 72, 72, 69, 72, 71, 71, 75, 72, 70, 69, 73, 69, 68, 68, 67, 67, 63, 68, 65, 71, 71, 67, 67, 66, 66, 61, 64, 65, 64, 65, 61, 60, 60, 62, 63, 58, 63, 60, 55, 58, 59, 58, 52, 53, 56, 59, 59, 52, 55, 57, 58, 60, 56, 61, 59, 58, 60, 59, 66, 66, 66, 62, 69, 74, 69, 67, 54, 53, 66, 55, 60, 61, 57, 58, 62, 59, 62, 63, 58, 66, 74, 64, 65, 66, 64, 64, 66, 66, 61, 67, 64, 64, 74, 68, 70, 70, 71, 72, 70, 70, 71, 66, 66, 68, 68, 71, 69, 75, 71, 71, 70, 75, 71, 68, 66, 70, 72, 67, 71, 65, 68, 71, 73, 69, 69, 66, 67, 71, 69, 70, 69, 70, 70, 66, 70, 70, 69, 70, 66, 69, 70, 70, 71, 70, 64, 65, 67, 66, 68, 67, 68, 67, 70, 66, 63, 64, 68, 72, 70, 60, 63, 67, 66, 68, 71, 68, 62, 70, 69, 64, 69, 66, 72, 67, 64, 68, 69, 70, 72, 66, 67, 66, 64, 63, 65, 65, 64, 65, 63, 64, 70, 67, 64, 68, 67, 69, 66, 68, 64, 63, 66, 62, 59, 61, 64, 64, 67, 72, 63, 67, 66, 67, 68, 68, 70, 70, 76, 68, 69, 69, 73, 69, 71, 65, 68, 69, 73, 76, 69, 74, 79, 76, 70, 71, 72, 70, 77, 70, 74, 73, 83, 78, 77, 75, 71, 73, 70, 76, 75, 62, 67, 69, 67, 70, 73, 73, 78, 70, 67, 71, 69, 68, 72, 72, 75, 72, 75, 71, 67, 70, 63, 68, 66, 67, 71, 71, 66, 66, 67, 64, 66, 62, 62, 65, 60, 65, 63, 62, 61, 58, 63, 57, 58, 59, 62, 59, 58, 55, 53, 56, 61, 55, 52, 51, 57, 56, 59, 64, 60, 61, 61, 57, 61, 67, 64, 64, 67, 69, 72, 75, 69, 58, 54, 62, 53, 60, 61, 62, 62, 61, 66, 62, 63, 64, 64, 73, 72, 70, 65, 64, 63, 66, 67, 63, 68, 68, 64, 63, 72, 63, 71, 70, 67, 66, 67, 70, 68, 65, 71, 70, 70, 74, 75, 79, 72, 73, 73, 71, 68, 69, 70, 70, 71, 66, 71, 69, 71, 65, 73, 69, 64, 65, 74, 74, 72, 69, 71, 68, 71, 71, 66, 67, 69, 72, 74, 73, 67, 73, 70, 76, 73, 68, 68, 70, 72, 72, 74, 65, 67, 71, 68, 73, 71, 72, 78, 72, 61, 60, 64, 70, 65, 68, 68, 74, 73, 67, 70, 65, 65, 59, 64, 69, 70, 70, 67, 67, 65, 68, 68, 65, 66, 67, 67, 64, 64, 71, 72, 66, 69, 66, 67, 73, 69, 73, 67, 68, 71, 66, 69, 69, 67, 67, 66, 69, 64, 64, 70, 78, 68, 67, 68, 73, 72, 68, 70, 77, 76, 74, 74, 71, 73, 77, 78, 73, 75, 79, 76, 79, 79, 70, 75, 69, 73, 69, 73, 73, 73, 76, 75, 74, 73, 79, 71, 73, 74, 66, 70, 75, 69, 74, 77, 77, 77, 70, 69, 71, 71, 73, 73, 68, 72, 68, 77, 80, 72, 68, 67, 64, 66, 70, 72, 71, 69, 72, 69, 62, 63, 65, 62, 67, 64, 65, 59, 58, 59, 64, 64, 59, 58, 57, 67, 65, 51, 52, 53, 55, 58, 55, 57, 56, 65, 63, 63, 64, 62, 59, 59, 60, 55, 65, 65, 64, 69, 71, 74, 63, 52, 59, 57, 56, 59, 67, 64, 61, 67, 70, 69, 62, 59, 60, 62, 71, 70, 70, 65, 67, 68, 70, 65, 62, 66, 64, 67, 64, 64, 68, 80, 76, 72, 69, 71, 71, 67, 67, 72, 63, 72, 67, 70, 72, 72, 71, 71, 73, 69, 65, 69, 72, 76, 69, 70, 76, 72, 74, 73, 67, 71, 67, 71, 78, 71, 68, 73, 67, 73, 74, 67, 69, 71, 75, 75, 74, 73, 76, 73, 70, 74, 67, 72, 69, 72, 67, 75, 66, 69, 69, 72, 67, 70, 70, 73, 69, 67, 70, 68, 68, 73, 71, 71, 74, 68, 67, 69, 65, 65, 59, 66, 72, 70, 70, 72, 63, 71, 73, 72, 69, 68, 68, 72, 64, 69, 69, 68, 67, 68, 66, 66, 69, 67, 66, 63, 66, 69, 65, 67, 71, 66, 71, 71, 67, 69, 74, 74, 71, 66, 69, 71, 69, 68, 74, 76, 69, 73, 71, 76, 75, 79, 77, 78, 79, 78, 76, 79, 83, 76, 73, 72, 74, 77, 79, 72, 70, 76, 79, 76, 71, 76, 78, 73, 74, 69, 69, 70, 70, 69, 69, 77, 71, 73, 76, 69, 70, 75, 79, 72, 67, 74, 77, 73, 73, 72, 70, 69, 74, 74, 74, 69, 70, 69, 72, 68, 67, 64, 64, 62, 63, 66, 65, 64, 60, 57, 63, 66, 59, 66, 64, 61, 61, 55, 62, 56, 57, 56, 61, 57, 56, 55, 65, 65, 63, 59, 60, 61, 62, 63, 67, 68, 68, 74, 70, 57, 56, 58, 61, 61, 57, 61, 67, 64, 63, 65, 71, 66, 66, 61, 67, 69, 68, 76, 66, 68, 65, 68, 69, 67, 65, 69, 71, 69, 67, 71, 70, 76, 73, 70, 68, 70, 71, 69, 68, 72, 66, 71, 66, 71, 74, 76, 76, 75, 71, 74, 69, 69, 73, 77, 74, 76, 76, 74, 77, 77, 72, 73, 71, 77, 77, 78, 80, 74, 69, 75, 77, 72, 71, 71, 74, 76, 74, 69, 70, 74, 70, 70, 69, 69, 71, 73, 68, 70, 68, 74, 71, 74, 74, 76, 73, 74, 75, 69, 75, 76, 71, 72, 75, 69, 70, 68, 67, 69, 67, 71, 72, 71, 72, 70, 70, 75, 69, 70, 71, 69, 70, 72, 69, 68, 69, 69, 67, 69, 72, 72, 73, 69, 69, 68, 66, 62, 68, 67, 66, 68, 72, 74, 75, 74, 76, 71, 72, 73, 73, 74, 77, 74, 71, 72, 76, 75, 75, 78, 79, 73, 80, 87, 77, 77, 78, 76, 73, 75, 80, 73, 75, 77, 76, 78, 78, 77, 78, 82, 78, 79, 74, 74, 75, 77, 74, 71, 72, 71, 73, 71, 74, 74, 70, 74, 75, 66, 69, 73, 76, 66, 68, 74, 71, 72, 72, 72, 71, 71, 71, 71, 71, 69, 71, 72, 71, 70, 67, 64, 64, 67, 68, 66, 65, 66, 60, 65, 63, 64, 58, 63, 66, 66, 66, 55, 58, 60, 61, 59, 59, 56, 65, 55, 63, 62, 63, 59, 58, 62, 63, 68, 67, 73, 72, 68, 59, 61, 60, 61, 66, 62, 57, 68, 68, 60, 63, 64, 74, 66, 65, 62, 73, 69, 65, 72, 68, 66, 69, 69, 64, 64, 66, 70, 71, 69, 70, 72, 77, 78, 73, 68, 67, 73, 74, 72, 70, 72, 67, 67, 67, 71, 77, 75, 73, 71, 69, 76, 78, 78, 78, 78, 78, 75, 73, 77, 76, 73, 73, 72, 76, 80, 77, 76, 80, 76, 74, 76, 77, 75, 71, 77, 77, 75, 75, 75, 69, 72, 73, 73, 73, 71, 70, 68, 69, 72, 72, 77, 72, 76, 83, 75, 75, 79, 81, 72, 79, 75, 71, 77, 76, 70, 71, 71, 69, 70, 75, 73, 72, 72, 72, 70, 66, 73, 70, 69, 70, 69, 72, 70, 71, 70, 75, 69, 70, 70, 69, 71, 72, 69, 71, 66, 65, 69, 68, 69, 73, 74, 75, 73, 75, 75, 74, 69, 76, 76, 76, 75, 75, 75, 75, 74, 78, 76, 79, 81, 82, 72, 80, 83, 77, 80, 76, 71, 73, 74, 72, 75, 75, 75, 78, 81, 78, 81, 75, 77, 74, 77, 72, 72, 73, 74, 73, 73, 72, 73, 73, 72, 73, 77, 75, 75, 76, 69, 70, 70, 73, 71, 68, 72, 72, 69, 73, 71, 72, 64, 67, 69, 67, 66, 72, 73, 69, 71, 68, 66, 70, 68, 65, 66, 66, 69, 61, 66, 62, 62, 64, 63, 64, 69, 65, 57, 54, 58, 56, 53, 57, 59, 63, 58, 62, 61, 63, 62, 61, 66, 63, 68, 65, 72, 67, 58, 57, 59, 60, 61, 67, 62, 63, 70, 65, 57, 61, 66, 72, 66, 59, 63, 74, 69, 68, 64, 71, 70, 69, 69, 65, 66, 68, 69, 70, 69, 72, 73, 75, 73, 70, 72, 76, 78, 75, 72, 69, 72, 71, 74, 74, 71, 72, 74, 73, 70, 72, 76, 78, 78, 74, 75, 73, 73, 74, 76, 75, 74, 80, 75, 78, 76, 77, 74, 76, 77, 76, 76, 76, 74, 73, 78, 80, 78, 77, 79, 73, 69, 73, 77, 70, 73, 74, 74, 71, 79, 75, 77, 73, 76, 82, 70, 69, 73, 79, 71, 81, 77, 74, 81, 75, 72, 73, 72, 69, 74, 70, 73, 74, 70, 73, 71, 66, 73, 68, 71, 73, 74, 72, 73, 71, 72, 75, 74, 73, 75, 74, 71, 69, 68, 70, 68, 71, 75, 71, 76, 78, 74, 69, 72, 75, 74, 77, 72, 78, 77, 77, 77, 77, 81, 83, 79, 80, 77, 80, 75, 73, 70, 78, 82, 79, 76, 73, 73, 74, 73, 73, 76, 81, 77, 78, 77, 76, 82, 72, 73, 72, 73, 71, 72, 72, 71, 74, 78, 73, 76, 72, 74, 74, 81, 79, 76, 78, 74, 73, 73, 75, 70, 68, 72, 71, 66, 77, 73, 73, 70, 67, 67, 66, 64, 70, 73, 70, 69, 67, 65, 70, 68, 67, 67, 68, 68, 63, 67, 67, 61, 67, 61, 63, 65, 56, 56, 56, 54, 58, 58, 56, 59, 60, 65, 64, 59, 64, 65, 62, 64, 62, 67, 67, 71, 56, 54, 62, 58, 61, 64, 72, 63, 61, 62, 64, 65, 68, 70, 66, 66, 63, 68, 67, 67, 71, 67, 66, 69, 69, 68, 65, 66, 64, 69, 76, 75, 73, 71, 75, 71, 69, 69, 76, 79, 75, 74, 70, 71, 72, 79, 74, 75, 77, 78, 74, 71, 75, 73, 76, 79, 76, 78, 80, 77, 76, 72, 74, 77, 78, 70, 76, 73, 77, 74, 81, 83, 75, 76, 78, 76, 75, 75, 76, 77, 74, 71, 73, 68, 71, 77, 71, 73, 69, 75, 72, 77, 75, 78, 76, 73, 77, 68, 69, 74, 78, 72, 79, 75, 71, 75, 75, 74, 73, 71, 73, 78, 70, 75, 73, 70, 77, 75, 68, 73, 67, 72, 72, 73, 70, 72, 74, 80, 76, 78, 75, 73, 71, 72, 72, 75, 76, 71, 74, 71, 73, 73, 75, 73, 72, 78, 75, 70, 75, 74, 78, 78, 78, 78, 79, 82, 84, 82, 80, 78, 80, 71, 67, 76, 77, 78, 83, 79, 75, 75, 75, 72, 74, 79, 78, 72, 77, 80, 76, 74, 68, 74, 74, 74, 72, 68, 72, 73, 75, 81, 78, 77, 71, 75, 78, 80, 76, 79, 79, 74, 75, 74, 72, 67, 68, 71, 71, 68, 72, 71, 72, 72, 66, 70, 74, 65, 67, 70, 66, 67, 66, 65, 68, 68, 71, 68, 64, 63, 65, 67, 69, 62, 62, 58, 60, 65, 58, 55, 54, 51, 57, 60, 56, 57, 57, 58, 57, 60, 67, 63, 61, 62, 62, 65, 68, 68, 58, 57, 56, 62, 58, 56, 70, 63, 63, 69, 66, 67, 64, 68, 66, 65, 66, 65, 68, 68, 69, 74, 71, 75, 73, 69, 65, 72, 76, 77, 79, 74, 72, 76, 72, 73, 78, 76, 76, 77, 74, 78, 78, 75, 71, 78, 71, 81, 80, 74, 74, 79, 84, 81, 78, 75, 83, 87, 81, 75, 73, 73, 71, 68, 71, 70, 77, 82, 81, 75, 79, 81, 73, 79, 81, 78, 76, 79, 77, 78, 76, 74, 76, 74, 78, 81, 77, 77, 74, 77, 75, 77, 76, 79, 84, 78, 80, 74, 77, 79, 73, 75, 81, 77, 78, 82, 75, 76, 76, 70, 75, 74, 78, 77, 74, 73, 78, 80, 71, 76, 73, 76, 74, 75, 76, 78, 77, 78, 76, 75, 73, 73, 70, 72, 76, 70, 72, 73, 74, 72, 81, 82, 77, 72, 77, 79, 79, 77, 77, 83, 86, 81, 77, 74, 76, 78, 79, 79, 82, 79, 81, 77, 77, 84, 84, 81, 83, 76, 73, 70, 75, 77, 82, 77, 73, 72, 76, 77, 75, 75, 77, 78, 70, 70, 72, 72, 80, 74, 76, 82, 80, 77, 78, 74, 71, 77, 80, 80, 77, 72, 77, 75, 73, 76, 74, 76, 75, 73, 69, 69, 71, 78, 71, 70, 74, 69, 69, 69, 64, 68, 68, 66, 68, 66, 69, 67, 62, 69, 68, 70, 68, 68, 65, 66, 62, 67, 64, 57, 51, 53, 57, 61, 60, 62, 59, 56, 63, 61, 61, 55, 55, 66, 69, 66, 65, 63, 63, 60, 61, 68, 65, 65, 68, 61, 61, 62, 65, 67, 63, 69, 72, 73, 77, 69, 68, 73, 71, 72, 72, 71, 73, 70, 66, 74, 80, 79, 76, 78, 79, 79, 81, 79, 79, 78, 78, 77, 77, 81, 80, 79, 75, 81, 73, 77, 80, 74, 79, 85, 81, 80, 82, 76, 83, 81, 80, 77, 75, 76, 74, 76, 75, 75, 77, 81, 80, 79, 77, 78, 73, 80, 81, 80, 79, 79, 81, 81, 77, 79, 80, 75, 78, 78, 76, 77, 77, 77, 78, 77, 76, 75, 82, 78, 77, 84, 86, 83, 82, 81, 87, 82, 80, 82, 76, 80, 80, 74, 77, 78, 80, 72, 76, 75, 79, 82, 73, 82, 77, 74, 73, 74, 83, 78, 78, 77, 78, 75, 74, 74, 76, 77, 77, 79, 86, 77, 73, 75, 80, 84, 81, 79, 83, 82, 82, 81, 82, 89, 88, 87, 81, 80, 79, 81, 84, 78, 88, 84, 85, 84, 86, 83, 83, 80, 84, 80, 77, 76, 76, 76, 81, 79, 71, 74, 76, 81, 80, 75, 74, 73, 70, 72, 77, 80, 79, 72, 77, 81, 77, 78, 79, 77, 70, 77, 73, 82, 77, 75, 79, 76, 77, 80, 77, 76, 74, 76, 77, 73, 71, 69, 76, 75, 73, 70, 69, 73, 72, 72, 66, 65, 67, 64, 66, 65, 63, 68, 63, 68, 64, 68, 63, 68, 63, 64, 65, 58, 55, 53, 55, 55, 58, 56, 60, 60, 60, 55, 55, 60, 55, 64, 64, 62, 59, 62, 70, 64, 64, 66, 65, 66, 65, 60, 62, 60, 69, 68, 68, 68, 70, 75, 70, 68, 67, 70, 70, 70, 71, 70, 71, 72, 74, 70, 74, 79, 75, 77, 82, 80, 71, 78, 74, 77, 79, 77, 81, 79, 79, 81, 84, 79, 74, 75, 82, 81, 86, 82, 77, 79, 87, 84, 85, 83, 82, 81, 77, 79, 76, 81, 79, 80, 77, 85, 81, 85, 82, 83, 76, 79, 79, 80, 80, 79, 82, 85, 78, 79, 79, 83, 79, 77, 76, 77, 76, 81, 78, 79, 78, 79, 82, 81, 84, 83, 85, 80, 81, 86, 84, 84, 81, 82, 76, 78, 79, 78, 81, 78, 79, 73, 78, 80, 82, 84, 80, 82, 83, 76, 74, 78, 82, 79, 78, 78, 74, 74, 74, 76, 76, 80, 81, 85, 86, 82, 74, 77, 84, 83, 81, 73, 77, 84, 81, 83, 85, 82, 81, 85, 80, 75, 78, 77, 83, 76, 83, 80, 82, 86, 85, 83, 78, 78, 81, 80, 78, 78, 77, 73, 70, 80, 75, 75, 78, 85, 82, 76, 77, 75, 80, 75, 76, 74, 78, 81, 79, 80, 77, 76, 82, 75, 75, 78, 84, 87, 82, 82, 78, 78, 83, 79, 77, 77, 76, 74, 77, 71, 72, 72, 70, 68, 71, 71, 70, 73, 74, 69, 65, 66, 67, 66, 63, 64, 67, 66, 65, 61, 66, 66, 71, 72, 67, 60, 66, 56, 54, 53, 56, 53, 56, 52, 57, 59, 58, 58, 58, 59, 54, 59, 60, 57, 63, 66, 71, 64, 69, 65, 63, 65, 70, 65, 61, 65, 68, 65, 67, 65, 69, 74, 70, 65, 66, 71, 69, 71, 67, 71, 73, 72, 70, 69, 72, 80, 81, 74, 78, 78, 73, 79, 77, 81, 81, 78, 82, 78, 80, 84, 84, 81, 78, 79, 81, 82, 83, 80, 81, 84, 85, 81, 84, 85, 84, 81, 80, 76, 78, 78, 82, 83, 79, 87, 85, 85, 82, 82, 84, 82, 84, 85, 85, 82, 82, 85, 79, 76, 81, 85, 81, 80, 81, 81, 77, 79, 84, 80, 80, 84, 84, 84, 86, 85, 86, 81, 84, 86, 85, 84, 82, 79, 77, 80, 80, 80, 80, 81, 81, 79, 87, 84, 83, 87, 85, 83, 82, 81, 76, 84, 80, 81, 84, 80, 79, 77, 79, 82, 81, 83, 82, 82, 86, 85, 79, 84, 85, 86, 85, 77, 79, 86, 85, 83, 85, 81, 79, 80, 77, 68, 75, 75, 78, 80, 75, 76, 80, 80, 81, 80, 76, 77, 81, 80, 77, 77, 79, 74, 69, 76, 73, 73, 76, 81, 77, 76, 76, 79, 81, 76, 80, 79, 80, 82, 80, 81, 77, 75, 79, 75, 78, 79, 82, 86, 83, 80, 81, 80, 79, 78, 78, 79, 79, 75, 74, 71, 71, 76, 71, 72, 72, 72, 73, 71, 70, 68, 65, 69, 70, 68, 63, 68, 68, 68, 67, 64, 67, 69, 69, 72, 67, 61, 65, 55, 55, 55, 56, 55, 56, 54, 56, 58, 59, 62, 59, 58, 56, 57, 64, 63, 68, 67, 64, 68, 66, 61, 64, 66, 68, 67, 59, 73, 70, 70, 68, 66, 71, 66, 68, 67, 71, 72, 73, 72, 72, 77, 74, 71, 65, 72, 76, 78, 80, 75, 75, 81, 82, 83, 79, 79, 81, 77, 80, 85, 83, 83, 87, 86, 81, 86, 80, 81, 82, 84, 81, 81, 83, 83, 86, 85, 89, 82, 81, 77, 78, 77, 87, 83, 81, 85, 84, 82, 83, 82, 87, 87, 84, 89, 85, 82, 82, 88, 85, 77, 84, 83, 78, 81, 87, 86, 80, 77, 89, 86, 81, 85, 84, 83, 84, 82, 84, 82, 83, 89, 87, 83, 82, 78, 82, 85, 83, 87, 82, 83, 83, 87, 90, 88, 85, 85, 86, 86, 83, 83, 79, 83, 82, 90, 88, 83, 85, 81, 83, 87, 85, 83, 81, 80, 88, 85, 85, 88, 87, 88, 84, 80, 85, 83, 86, 85, 85, 84, 80, 79, 78, 71, 76, 76, 79, 82, 76, 82, 80, 77, 77, 82, 80, 79, 81, 83, 77, 79, 80, 74, 69, 77, 75, 75, 79, 79, 77, 78, 76, 81, 84, 79, 79, 79, 78, 81, 79, 79, 77, 78, 76, 78, 78, 74, 72, 81, 78, 73, 80, 82, 75, 80, 79, 78, 78, 77, 76, 74, 75, 74, 75, 73, 72, 73, 73, 71, 70, 70, 68, 71, 70, 73, 68, 69, 67, 68, 69, 66, 66, 69, 65, 70, 68, 68, 72, 50, 52, 54, 53, 56, 56, 53, 53, 59, 61, 58, 57, 64, 62, 58, 62, 61, 65, 66, 68, 67, 67, 62, 58, 70, 74, 66, 67, 74, 70, 69, 65, 71, 75, 69, 70, 73, 78, 73, 74, 73, 72, 79, 70, 71, 68, 76, 76, 75, 77, 78, 77, 80, 84, 84, 83, 79, 82, 82, 81, 86, 85, 84, 86, 88, 89, 92, 84, 84, 85, 89, 84, 85, 85, 85, 85, 84, 84, 80, 81, 87, 82, 82, 91, 85, 82, 85, 86, 88, 89, 88, 87, 89, 85, 92, 89, 84, 82, 85, 87, 86, 87, 83, 82, 82, 87, 84, 85, 85, 93, 90, 87, 87, 82, 87, 87, 86, 87, 88, 83, 87, 87, 82, 85, 79, 84, 85, 84, 91, 89, 87, 86, 89, 88, 90, 89, 89, 87, 88, 89, 84, 91, 93, 88, 88, 87, 86, 88, 83, 85, 89, 90, 90, 81, 82, 88, 85, 87, 89, 86, 83, 84, 81, 86, 80, 86, 87, 86, 85, 82, 86, 82, 79, 79, 79, 84, 80, 81, 83, 79, 82, 82, 86, 87, 84, 82, 83, 81, 85, 82, 78, 73, 79, 77, 75, 78, 79, 81, 78, 75, 77, 84, 81, 77, 81, 79, 80, 79, 79, 77, 82, 81, 85, 81, 77, 75, 77, 78, 72, 76, 83, 83, 88, 84, 81, 80, 78, 77, 77, 78, 76, 75, 74, 64, 74, 74, 74, 71, 70, 70, 76, 71, 77, 70, 69, 68, 68, 67, 66, 66, 70, 64, 68, 65, 67, 69, 51, 53, 56, 52, 58, 56, 51, 54, 58, 54, 51, 55, 60, 66, 65, 62, 62, 64, 63, 73, 70, 65, 67, 59, 66, 69, 64, 67, 69, 69, 68, 69, 79, 73, 74, 71, 69, 74, 71, 76, 82, 74, 81, 75, 76, 73, 82, 82, 77, 79, 78, 79, 76, 81, 82, 88, 83, 87, 87, 81, 85, 85, 85, 85, 88, 86, 89, 89, 87, 82, 84, 88, 84, 84, 85, 84, 87, 87, 86, 78, 83, 85, 91, 92, 88, 86, 90, 90, 96, 91, 85, 88, 89, 89, 92, 95, 84, 90, 87, 86, 93, 89, 88, 91, 88, 89, 85, 84, 86, 92, 90, 87, 88, 89, 94, 93, 92, 91, 93, 89, 91, 91, 88, 87, 82, 84, 86, 88, 84, 87, 88, 88, 86, 85, 90, 88, 86, 81, 83, 92, 90, 95, 96, 94, 91, 91, 92, 97, 99, 88, 89, 91, 94, 89, 88, 90, 89, 82, 77, 84, 84, 86, 83, 87, 83, 86, 84, 85, 84, 84, 89, 84, 83, 80, 80, 84, 78, 81, 82, 77, 82, 81, 81, 86, 87, 89, 89, 87, 87, 85, 82, 73, 79, 78, 78, 82, 83, 85, 76, 76, 75, 81, 79, 77, 79, 79, 79, 78, 80, 77, 81, 81, 87, 84, 79, 78, 78, 76, 69, 73, 80, 86, 86, 85, 83, 83, 80, 74, 79, 77, 78, 77, 72, 66, 75, 71, 72, 69, 69, 76, 74, 72, 75, 69, 70, 69, 68, 68, 66, 69, 74, 71, 67, 65, 69, 71, 58, 58, 62, 59, 62, 59, 53, 56, 55, 52, 56, 57, 54, 61, 58, 59, 63, 65, 66, 68, 69, 61, 65, 63, 65, 65, 64, 68, 72, 72, 72, 71, 76, 68, 74, 75, 75, 74, 77, 80, 83, 77, 75, 80, 77, 73, 80, 84, 80, 82, 81, 81, 82, 84, 84, 93, 89, 88, 87, 80, 86, 86, 86, 87, 89, 86, 85, 89, 92, 90, 88, 90, 92, 89, 87, 87, 94, 90, 92, 89, 88, 90, 93, 88, 86, 85, 88, 88, 94, 92, 90, 91, 90, 92, 91, 94, 89, 95, 94, 88, 91, 94, 91, 91, 89, 89, 88, 85, 89, 91, 93, 90, 90, 91, 89, 96, 90, 90, 88, 88, 95, 93, 88, 88, 84, 92, 90, 93, 84, 83, 88, 90, 89, 85, 88, 88, 87, 81, 84, 96, 92, 92, 89, 93, 95, 95, 94, 97, 97, 89, 91, 93, 94, 98, 93, 89, 85, 78, 84, 92, 90, 86, 83, 86, 87, 88, 85, 88, 90, 85, 81, 88, 88, 82, 85, 86, 91, 88, 89, 84, 85, 84, 84, 86, 86, 88, 86, 87, 89, 89, 81, 76, 80, 80, 85, 87, 86, 84, 80, 77, 79, 82, 77, 78, 77, 77, 79, 79, 83, 78, 78, 78, 84, 83, 77, 75, 79, 74, 69, 75, 78, 86, 84, 84, 84, 83, 82, 76, 79, 77, 77, 76, 68, 73, 75, 74, 75, 68, 67, 72, 71, 71, 73, 69, 71, 68, 65, 64, 68, 68, 68, 70, 67, 73, 68, 73, 57, 56, 61, 58, 58, 59, 58, 57, 55, 52, 57, 57, 58, 60, 57, 59, 61, 61, 67, 64, 64, 64, 64, 64, 68, 67, 64, 74, 73, 72, 72, 74, 82, 76, 78, 78, 77, 73, 79, 79, 76, 78, 74, 78, 77, 77, 81, 85, 82, 82, 84, 85, 92, 88, 88, 92, 90, 89, 88, 82, 85, 87, 88, 85, 87, 88, 87, 90, 89, 89, 89, 91, 97, 90, 87, 85, 95, 90, 90, 92, 91, 90, 94, 91, 89, 86, 92, 93, 93, 94, 95, 94, 93, 91, 93, 94, 88, 91, 96, 94, 92, 92, 89, 88, 90, 93, 89, 89, 95, 93, 91, 90, 91, 91, 90, 89, 86, 90, 86, 89, 89, 89, 86, 93, 90, 93, 88, 89, 91, 87, 90, 92, 93, 85, 89, 92, 94, 91, 90, 95, 89, 94, 96, 97, 92, 96, 99, 97, 94, 92, 94, 95, 97, 93, 90, 96, 96, 89, 95, 95, 92, 92, 92, 91, 93, 92, 86, 87, 90, 91, 91, 93, 87, 86, 88, 84, 94, 90, 91, 88, 89, 89, 91, 89, 86, 89, 89, 88, 90, 89, 82, 83, 80, 81, 86, 88, 88, 85, 87, 78, 83, 83, 78, 79, 77, 79, 80, 79, 85, 81, 80, 80, 82, 80, 76, 79, 76, 70, 71, 76, 72, 84, 80, 79, 78, 79, 80, 77, 77, 77, 79, 74, 74, 78, 77, 75, 78, 70, 71, 75, 72, 71, 72, 68, 68, 68, 68, 68, 69, 70, 68, 68, 63, 71, 69, 71, 57, 57, 60, 57, 57, 55, 60, 58, 55, 53, 64, 61, 59, 59, 61, 57, 57, 59, 61, 62, 62, 65, 69, 67, 69, 69, 69, 77, 75, 71, 71, 78, 84, 79, 83, 79, 77, 81, 82, 83, 82, 80, 76, 76, 77, 81, 83, 89, 86, 81, 83, 83, 89, 89, 91, 86, 84, 83, 85, 84, 85, 87, 89, 88, 87, 88, 85, 88, 86, 89, 90, 92, 93, 91, 89, 86, 93, 90, 87, 89, 94, 86, 91, 94, 93, 92, 95, 94, 95, 96, 97, 101, 94, 92, 93, 95, 93, 96, 97, 97, 91, 92, 92, 90, 92, 94, 93, 94, 93, 96, 97, 94, 95, 96, 91, 91, 91, 92, 90, 88, 91, 91, 89, 94, 89, 86, 87, 92, 96, 93, 95, 96, 94, 86, 91, 92, 99, 100, 95, 97, 91, 93, 101, 98, 94, 96, 94, 89, 95, 96, 93, 92, 99, 94, 92, 96, 99, 92, 91, 95, 95, 95, 95, 89, 98, 99, 89, 91, 91, 90, 96, 92, 89, 90, 92, 88, 93, 93, 91, 90, 90, 88, 91, 90, 89, 89, 89, 89, 88, 87, 88, 90, 84, 88, 90, 93, 93, 87, 89, 81, 86, 83, 81, 84, 81, 82, 79, 80, 85, 85, 84, 82, 86, 82, 78, 79, 78, 71, 76, 79, 73, 84, 77, 77, 77, 79, 77, 75, 74, 77, 79, 77, 80, 79, 74, 75, 78, 72, 73, 75, 70, 73, 72, 72, 71, 71, 71, 73, 75, 72, 70, 72, 70, 67, 69, 65, 58, 56, 59, 57, 60, 58, 58, 58, 57, 60, 67, 65, 61, 61, 64, 59, 58, 58, 57, 61, 61, 67, 74, 72, 70, 75, 74, 77, 74, 75, 77, 79, 81, 81, 86, 82, 79, 82, 85, 88, 85, 82, 81, 81, 83, 82, 83, 87, 93, 87, 84, 82, 81, 85, 85, 82, 79, 77, 81, 86, 88, 86, 86, 87, 88, 85, 81, 89, 87, 91, 94, 94, 94, 90, 88, 88, 94, 92, 92, 94, 93, 88, 88, 95, 91, 94, 95, 91, 98, 96, 96, 104, 95, 93, 96, 101, 96, 100, 99, 97, 94, 99, 98, 96, 95, 96, 97, 98, 96, 98, 98, 96, 95, 100, 93, 96, 95, 93, 97, 94, 91, 91, 94, 94, 94, 89, 90, 96, 95, 92, 94, 99, 95, 87, 93, 92, 94, 99, 96, 95, 94, 96, 99, 96, 96, 99, 95, 89, 97, 96, 92, 93, 101, 98, 96, 95, 97, 95, 92, 95, 98, 98, 96, 95, 99, 99, 91, 95, 93, 92, 91, 90, 93, 98, 97, 94, 94, 92, 95, 97, 95, 90, 97, 92, 94, 94, 90, 89, 91, 90, 92, 92, 90, 92, 93, 93, 92, 89, 89, 86, 88, 86, 84, 88, 86, 85, 83, 83, 86, 87, 88, 85, 90, 83, 81, 81, 80, 76, 80, 82, 77, 83, 79, 81, 78, 79, 79, 78, 76, 80, 84, 84, 85, 80, 78, 74, 76, 74, 75, 71, 72, 73, 72, 72, 73, 72, 71, 74, 76, 69, 68, 73, 71, 68, 70, 67, 55, 58, 60, 58, 64, 65, 60, 62, 59, 66, 66, 65, 62, 60, 64, 61, 61, 61, 60, 60, 64, 63, 68, 74, 72, 79, 75, 76, 75, 78, 82, 82, 78, 80, 85, 82, 78, 82, 82, 86, 83, 81, 84, 87, 87, 80, 77, 79, 80, 81, 82, 87, 82, 81, 81, 80, 79, 80, 82, 88, 89, 87, 86, 87, 87, 87, 85, 93, 91, 94, 96, 93, 97, 88, 93, 89, 97, 91, 97, 100, 97, 95, 97, 99, 91, 90, 94, 92, 94, 98, 101, 102, 96, 96, 98, 101, 95, 99, 99, 98, 97, 104, 101, 100, 96, 98, 101, 99, 96, 101, 95, 96, 94, 100, 96, 95, 95, 98, 102, 97, 91, 93, 94, 98, 95, 97, 96, 96, 95, 88, 92, 94, 92, 87, 96, 94, 92, 98, 97, 89, 92, 96, 99, 95, 95, 102, 99, 93, 98, 93, 97, 99, 98, 99, 98, 99, 100, 102, 98, 100, 99, 98, 100, 103, 99, 94, 92, 102, 99, 101, 98, 99, 100, 99, 99, 98, 96, 91, 100, 105, 105, 94, 104, 97, 99, 98, 96, 94, 96, 94, 95, 94, 93, 92, 89, 89, 95, 98, 92, 91, 91, 86, 80, 83, 86, 88, 87, 85, 86, 89, 89, 87, 90, 80, 81, 83, 85, 81, 83, 86, 82, 79, 79, 84, 77, 78, 82, 84, 80, 84, 94, 90, 88, 81, 83, 76, 74, 74, 78, 74, 76, 72, 68, 72, 76, 74, 71, 73, 74, 71, 69, 70, 70, 71, 72, 70, 1, 1, 1, 1, 1, 4, 13, 10, 11, 12, 14, 15, 17, 24, 23, 27, 20, 23, 19, 13, 18, 16, 15, 25, 22, 23, 20, 19, 20, 20, 17, 15, 11, 11, 13, 10, 13, 10, 11, 13, 13, 16, 12, 14, 13, 12, 13, 22, 22, 19, 28, 26, 28, 30, 33, 37, 38, 40, 44, 40, 43, 40, 39, 43, 48, 42, 40, 45, 47, 47, 51, 55, 53, 60, 63, 56, 61, 57, 59, 56, 65, 63, 63, 62, 63, 66, 74, 74, 74, 74, 72, 71, 73, 74, 78, 79, 78, 81, 80, 79, 81, 89, 85, 84, 88, 83, 89, 92, 93, 93, 94, 95, 102, 110, 108, 117, 107, 110, 109, 109, 109, 113, 108, 105, 108, 111, 115, 111, 118, 114, 113, 109, 115, 108, 114, 110, 111, 108, 110, 110, 111, 111, 109, 107, 107, 107, 110, 110, 108, 113, 111, 106, 105, 106, 103, 100, 98, 99, 102, 105, 102, 102, 104, 104, 104, 99, 99, 102, 96, 93, 94, 93, 96, 98, 91, 96, 98, 90, 92, 94, 90, 92, 87, 90, 92, 88, 83, 81, 80, 84, 73, 74, 70, 65, 66, 68, 69, 66, 60, 60, 55, 61, 58, 64, 59, 64, 62, 64, 60, 64, 56, 55, 61, 56, 51, 48, 47, 42, 42, 43, 42, 44, 46, 46, 48, 44, 46, 48, 45, 41, 39, 39, 40, 38, 37, 42, 42, 41, 40, 42, 40, 39, 39, 37, 34, 33, 32, 32, 29, 35, 30, 28, 27, 34, 28, 25, 27, 1, 1, 1, 1, 3, 8, 13, 10, 12, 14, 14, 17, 23, 24, 23, 23, 20, 21, 15, 17, 16, 18, 24, 23, 20, 21, 27, 24, 25, 19, 16, 15, 13, 8, 13, 10, 13, 11, 14, 16, 13, 16, 13, 10, 16, 15, 14, 19, 21, 22, 21, 26, 29, 34, 34, 41, 47, 40, 37, 40, 39, 45, 42, 47, 47, 40, 40, 45, 48, 49, 58, 55, 54, 61, 59, 62, 60, 56, 58, 58, 63, 64, 65, 65, 65, 76, 74, 74, 72, 75, 74, 79, 73, 76, 75, 75, 79, 79, 83, 84, 86, 84, 84, 85, 84, 88, 90, 92, 90, 91, 94, 96, 100, 104, 112, 109, 109, 110, 109, 106, 111, 106, 110, 110, 106, 109, 112, 109, 108, 108, 105, 108, 107, 111, 105, 106, 107, 110, 113, 115, 109, 107, 103, 109, 108, 107, 110, 108, 110, 110, 108, 113, 111, 106, 105, 101, 99, 103, 104, 103, 103, 104, 104, 107, 102, 106, 103, 100, 95, 99, 97, 99, 99, 94, 96, 90, 93, 92, 92, 93, 97, 91, 92, 89, 84, 83, 82, 82, 75, 74, 75, 74, 70, 69, 70, 67, 66, 62, 60, 58, 61, 61, 64, 59, 65, 64, 63, 65, 63, 58, 58, 58, 54, 52, 52, 43, 42, 41, 43, 44, 46, 48, 51, 48, 50, 49, 52, 44, 42, 39, 40, 40, 37, 42, 46, 45, 47, 41, 37, 37, 40, 38, 36, 35, 31, 35, 34, 34, 33, 32, 30, 31, 30, 27, 27, 25, 1, 1, 1, 1, 1, 6, 9, 11, 14, 13, 18, 21, 25, 20, 25, 21, 19, 15, 17, 19, 22, 25, 22, 19, 20, 23, 26, 25, 23, 20, 20, 18, 13, 13, 10, 13, 13, 14, 12, 15, 17, 15, 16, 17, 18, 17, 14, 17, 19, 21, 27, 31, 33, 38, 40, 39, 40, 41, 39, 42, 42, 45, 49, 46, 39, 43, 49, 47, 55, 52, 56, 61, 60, 62, 63, 58, 62, 58, 62, 65, 69, 69, 67, 73, 77, 76, 72, 77, 79, 78, 77, 78, 70, 74, 80, 81, 81, 83, 84, 78, 85, 84, 84, 88, 89, 92, 92, 92, 95, 98, 99, 104, 111, 110, 106, 112, 110, 106, 111, 106, 110, 109, 108, 107, 110, 106, 106, 107, 105, 105, 106, 105, 105, 105, 106, 107, 112, 109, 108, 105, 101, 103, 109, 105, 104, 108, 111, 113, 108, 110, 110, 110, 108, 105, 104, 105, 108, 108, 107, 105, 105, 103, 102, 102, 100, 103, 100, 102, 99, 101, 100, 92, 95, 94, 97, 95, 95, 90, 91, 93, 94, 88, 86, 84, 83, 79, 74, 76, 73, 71, 69, 68, 68, 66, 64, 61, 62, 61, 61, 60, 63, 65, 66, 64, 60, 61, 56, 58, 52, 55, 55, 49, 51, 45, 40, 43, 47, 47, 50, 51, 52, 52, 54, 52, 51, 42, 42, 45, 44, 43, 36, 44, 46, 46, 48, 41, 37, 40, 41, 36, 33, 37, 33, 36, 32, 32, 29, 31, 28, 31, 29, 28, 27, 24, 1, 1, 1, 1, 4, 8, 13, 10, 13, 13, 17, 19, 24, 19, 25, 24, 21, 17, 20, 20, 21, 21, 25, 21, 20, 25, 24, 22, 23, 23, 22, 20, 19, 15, 15, 16, 13, 9, 15, 14, 14, 16, 16, 21, 19, 15, 13, 17, 19, 24, 27, 29, 35, 33, 38, 39, 39, 39, 43, 44, 47, 50, 49, 45, 44, 47, 44, 49, 54, 58, 58, 56, 57, 61, 57, 62, 66, 64, 68, 70, 70, 69, 72, 78, 78, 80, 80, 78, 82, 81, 78, 74, 76, 78, 84, 82, 82, 82, 79, 81, 81, 80, 85, 88, 91, 92, 96, 101, 102, 100, 101, 107, 109, 105, 110, 109, 106, 108, 104, 106, 105, 108, 108, 107, 111, 105, 104, 108, 100, 104, 106, 108, 105, 106, 107, 110, 105, 108, 103, 103, 103, 107, 108, 107, 110, 110, 109, 109, 109, 108, 113, 110, 106, 106, 107, 108, 106, 109, 103, 100, 101, 102, 99, 99, 103, 103, 102, 99, 102, 102, 98, 97, 101, 95, 93, 93, 90, 88, 92, 92, 89, 87, 84, 82, 81, 79, 75, 72, 73, 68, 68, 68, 64, 64, 65, 63, 58, 60, 63, 64, 67, 64, 63, 56, 57, 54, 55, 52, 48, 49, 48, 47, 40, 43, 48, 53, 49, 50, 57, 53, 54, 51, 54, 49, 47, 43, 47, 45, 46, 40, 48, 46, 46, 44, 40, 36, 37, 38, 37, 35, 38, 34, 34, 36, 32, 31, 32, 30, 30, 27, 25, 26, 26, 1, 1, 1, 3, 7, 11, 13, 13, 14, 20, 21, 18, 25, 26, 19, 17, 23, 23, 21, 23, 23, 20, 18, 18, 23, 24, 22, 24, 25, 21, 20, 21, 16, 18, 18, 17, 17, 15, 14, 19, 16, 21, 22, 23, 17, 17, 19, 25, 27, 27, 31, 35, 37, 40, 39, 41, 42, 48, 51, 48, 47, 46, 45, 46, 46, 47, 55, 56, 57, 57, 58, 62, 59, 59, 69, 65, 68, 68, 73, 77, 76, 80, 78, 80, 77, 78, 80, 79, 76, 76, 76, 78, 79, 80, 81, 78, 78, 75, 78, 79, 82, 84, 84, 91, 98, 104, 104, 103, 105, 105, 107, 104, 107, 107, 106, 106, 103, 106, 106, 105, 110, 103, 108, 104, 102, 107, 104, 107, 107, 104, 101, 104, 105, 106, 106, 105, 103, 104, 108, 110, 109, 113, 107, 109, 107, 110, 112, 109, 111, 108, 107, 105, 110, 111, 108, 113, 105, 102, 102, 103, 104, 97, 98, 101, 98, 99, 100, 100, 105, 100, 103, 94, 95, 92, 95, 88, 87, 88, 87, 86, 82, 83, 85, 79, 79, 73, 74, 67, 65, 67, 63, 63, 62, 62, 62, 59, 63, 62, 64, 64, 63, 59, 56, 53, 49, 50, 46, 45, 46, 42, 38, 46, 51, 56, 50, 49, 60, 53, 55, 50, 51, 46, 49, 44, 51, 45, 47, 45, 50, 47, 44, 41, 41, 37, 36, 36, 37, 32, 35, 36, 34, 35, 30, 34, 29, 31, 31, 26, 28, 28, 26, 1, 1, 1, 1, 1, 2, 6, 13, 10, 12, 13, 14, 19, 18, 21, 20, 24, 23, 22, 24, 20, 19, 24, 30, 23, 20, 25, 23, 25, 24, 25, 26, 26, 20, 25, 16, 18, 19, 22, 18, 18, 18, 16, 16, 18, 19, 25, 25, 19, 18, 24, 26, 28, 25, 34, 33, 37, 40, 44, 44, 45, 44, 46, 51, 50, 50, 47, 50, 51, 54, 57, 61, 60, 61, 66, 66, 64, 64, 65, 64, 70, 77, 82, 79, 77, 76, 79, 76, 77, 80, 83, 83, 78, 79, 79, 72, 72, 75, 73, 72, 75, 79, 81, 81, 83, 83, 94, 97, 100, 102, 106, 107, 103, 103, 103, 105, 106, 105, 104, 102, 105, 107, 103, 104, 105, 106, 102, 105, 108, 104, 102, 105, 103, 103, 107, 106, 105, 103, 104, 106, 107, 109, 109, 105, 111, 108, 112, 106, 107, 109, 107, 108, 107, 105, 106, 109, 108, 109, 111, 107, 105, 103, 103, 106, 96, 97, 101, 95, 101, 99, 103, 107, 101, 98, 91, 93, 90, 92, 88, 90, 82, 82, 79, 78, 81, 83, 83, 83, 77, 74, 70, 67, 69, 67, 67, 64, 59, 60, 57, 61, 61, 64, 65, 59, 53, 48, 50, 52, 51, 50, 50, 40, 41, 50, 55, 53, 58, 54, 53, 53, 52, 55, 51, 48, 47, 45, 43, 49, 47, 49, 49, 47, 47, 46, 43, 42, 37, 37, 35, 34, 27, 32, 37, 37, 38, 35, 31, 29, 33, 31, 24, 25, 30, 25, 1, 1, 1, 1, 1, 2, 5, 8, 11, 14, 15, 16, 18, 24, 15, 23, 20, 23, 23, 21, 21, 27, 29, 26, 24, 22, 18, 21, 27, 26, 22, 28, 21, 26, 18, 22, 20, 23, 22, 23, 22, 18, 21, 18, 20, 24, 21, 18, 21, 23, 22, 27, 24, 36, 33, 36, 35, 41, 42, 43, 44, 49, 48, 47, 57, 47, 48, 53, 57, 58, 63, 58, 58, 64, 68, 71, 64, 70, 67, 76, 74, 78, 81, 80, 77, 74, 77, 82, 85, 79, 82, 82, 82, 79, 76, 76, 77, 79, 74, 79, 78, 83, 82, 87, 96, 96, 98, 106, 105, 105, 103, 107, 104, 103, 101, 100, 97, 100, 98, 96, 102, 105, 99, 100, 98, 103, 106, 104, 105, 99, 98, 100, 103, 108, 106, 102, 103, 107, 104, 111, 111, 114, 113, 109, 106, 107, 104, 108, 110, 108, 109, 105, 99, 106, 111, 105, 110, 108, 106, 104, 100, 101, 101, 99, 97, 101, 94, 101, 99, 104, 98, 95, 97, 95, 91, 93, 91, 86, 88, 83, 85, 82, 81, 81, 77, 83, 77, 80, 78, 73, 67, 68, 64, 63, 62, 63, 65, 62, 65, 68, 68, 64, 59, 50, 51, 55, 54, 57, 56, 54, 50, 60, 64, 68, 59, 60, 57, 58, 49, 55, 48, 49, 44, 48, 49, 52, 51, 47, 47, 48, 44, 46, 45, 45, 40, 34, 38, 34, 37, 32, 32, 35, 34, 30, 32, 28, 27, 27, 29, 26, 26, 28, 24, 1, 1, 1, 1, 3, 13, 10, 8, 14, 14, 17, 19, 18, 19, 19, 21, 23, 23, 25, 19, 25, 28, 25, 25, 27, 19, 23, 24, 25, 21, 27, 24, 25, 22, 21, 25, 25, 25, 26, 23, 21, 23, 20, 25, 27, 23, 20, 23, 25, 23, 29, 27, 35, 32, 31, 37, 39, 43, 45, 45, 45, 51, 45, 53, 54, 54, 55, 61, 60, 63, 61, 58, 64, 70, 74, 76, 71, 72, 73, 73, 79, 80, 82, 81, 80, 81, 80, 82, 84, 83, 85, 81, 82, 82, 80, 80, 80, 82, 79, 83, 90, 90, 100, 101, 99, 95, 101, 99, 102, 102, 106, 105, 100, 99, 95, 91, 97, 96, 99, 98, 103, 99, 98, 100, 102, 103, 101, 99, 99, 97, 101, 102, 107, 107, 103, 99, 105, 105, 108, 106, 112, 109, 110, 109, 108, 103, 104, 111, 104, 107, 106, 101, 103, 109, 104, 110, 108, 102, 103, 100, 101, 102, 99, 98, 99, 96, 98, 98, 100, 89, 91, 95, 90, 91, 94, 89, 88, 88, 87, 84, 82, 78, 82, 80, 79, 78, 81, 74, 76, 71, 70, 67, 65, 64, 71, 73, 72, 74, 73, 78, 72, 70, 69, 65, 64, 63, 63, 60, 58, 64, 71, 69, 69, 64, 61, 56, 59, 50, 51, 48, 50, 49, 48, 48, 48, 52, 45, 47, 44, 46, 41, 41, 45, 43, 38, 38, 37, 32, 35, 34, 32, 27, 29, 27, 30, 22, 23, 27, 25, 24, 20, 25, 1, 1, 1, 1, 1, 2, 8, 9, 12, 13, 14, 16, 17, 21, 20, 20, 23, 25, 25, 27, 23, 26, 25, 24, 27, 22, 25, 24, 26, 24, 27, 28, 29, 24, 27, 31, 27, 29, 29, 24, 22, 25, 25, 25, 33, 30, 24, 27, 30, 25, 27, 34, 36, 34, 34, 37, 41, 44, 45, 47, 43, 49, 48, 54, 58, 60, 59, 63, 64, 66, 63, 64, 67, 69, 71, 72, 76, 74, 77, 76, 79, 82, 84, 80, 79, 79, 80, 81, 84, 84, 87, 81, 85, 82, 79, 81, 81, 87, 85, 90, 97, 92, 100, 99, 97, 94, 100, 101, 101, 100, 105, 101, 98, 100, 97, 92, 98, 98, 99, 98, 101, 101, 102, 99, 104, 101, 98, 98, 98, 97, 101, 101, 104, 109, 102, 102, 104, 105, 108, 106, 108, 111, 113, 114, 104, 100, 106, 108, 105, 104, 107, 103, 100, 104, 111, 105, 104, 102, 105, 102, 100, 99, 99, 98, 98, 96, 94, 93, 92, 89, 94, 94, 91, 88, 92, 91, 85, 86, 84, 82, 82, 81, 83, 81, 82, 82, 83, 75, 75, 78, 80, 78, 72, 73, 87, 83, 79, 79, 76, 85, 83, 77, 74, 69, 69, 70, 62, 61, 58, 71, 66, 71, 66, 61, 59, 56, 56, 54, 55, 51, 51, 49, 50, 48, 46, 49, 48, 49, 44, 45, 44, 44, 41, 40, 37, 31, 34, 28, 32, 34, 29, 26, 27, 26, 30, 24, 26, 24, 23, 25, 23, 24, 1, 2, 1, 1, 2, 1, 3, 9, 11, 14, 13, 16, 19, 21, 22, 22, 22, 25, 24, 29, 24, 26, 25, 24, 27, 27, 27, 26, 27, 26, 26, 29, 30, 25, 29, 32, 34, 29, 30, 27, 26, 27, 29, 26, 32, 33, 28, 31, 34, 32, 32, 33, 37, 37, 36, 40, 41, 43, 44, 47, 49, 51, 50, 55, 58, 60, 60, 65, 68, 69, 65, 68, 68, 68, 70, 68, 77, 77, 78, 77, 78, 80, 82, 84, 81, 79, 81, 83, 84, 84, 88, 87, 86, 83, 82, 82, 82, 89, 86, 96, 101, 95, 97, 97, 98, 94, 96, 100, 98, 98, 101, 101, 96, 96, 98, 99, 101, 95, 95, 97, 97, 97, 100, 100, 100, 97, 99, 98, 98, 98, 98, 100, 103, 105, 102, 103, 104, 105, 106, 111, 109, 112, 106, 109, 103, 101, 108, 103, 98, 98, 101, 98, 96, 98, 106, 101, 98, 101, 101, 97, 100, 97, 95, 99, 97, 94, 88, 88, 89, 87, 89, 87, 88, 85, 88, 91, 84, 83, 82, 80, 83, 80, 82, 80, 82, 80, 79, 78, 77, 86, 87, 92, 93, 88, 87, 87, 85, 81, 79, 86, 81, 76, 72, 65, 65, 71, 65, 60, 58, 69, 64, 69, 62, 59, 59, 57, 57, 55, 58, 55, 53, 51, 52, 49, 52, 51, 50, 50, 46, 45, 43, 43, 39, 38, 35, 31, 34, 32, 32, 31, 29, 24, 26, 26, 27, 26, 25, 25, 22, 25, 27, 24, 1, 3, 2, 2, 4, 1, 2, 9, 13, 10, 14, 11, 14, 17, 17, 20, 24, 21, 23, 23, 27, 25, 27, 27, 25, 29, 30, 28, 27, 26, 26, 25, 29, 29, 28, 30, 32, 39, 34, 34, 33, 32, 31, 34, 31, 31, 32, 27, 29, 32, 36, 39, 34, 37, 38, 39, 44, 43, 41, 46, 45, 50, 51, 54, 56, 54, 58, 63, 62, 69, 68, 68, 68, 67, 73, 71, 69, 73, 75, 75, 76, 77, 80, 82, 84, 80, 84, 83, 90, 88, 83, 83, 83, 85, 82, 86, 85, 86, 88, 91, 93, 94, 96, 97, 97, 98, 94, 93, 97, 96, 98, 102, 98, 96, 96, 98, 101, 104, 99, 98, 98, 95, 95, 95, 99, 96, 97, 101, 99, 99, 101, 98, 98, 107, 102, 103, 104, 106, 106, 104, 111, 107, 110, 104, 102, 99, 99, 102, 94, 96, 94, 94, 92, 92, 93, 93, 93, 91, 98, 96, 91, 99, 96, 94, 99, 93, 93, 89, 86, 88, 85, 83, 82, 84, 81, 82, 87, 84, 84, 84, 82, 83, 79, 80, 76, 78, 78, 71, 78, 88, 101, 93, 94, 94, 90, 88, 86, 84, 83, 82, 83, 78, 80, 73, 64, 62, 68, 67, 62, 60, 65, 65, 65, 61, 59, 57, 58, 59, 60, 59, 56, 52, 52, 56, 51, 54, 56, 52, 50, 47, 43, 39, 41, 36, 36, 31, 34, 36, 33, 31, 28, 29, 25, 26, 27, 26, 24, 25, 25, 24, 25, 24, 22, 1, 1, 1, 3, 2, 3, 4, 3, 2, 8, 9, 13, 11, 13, 10, 14, 17, 20, 23, 20, 21, 23, 24, 25, 24, 27, 24, 27, 31, 31, 30, 28, 28, 25, 27, 28, 32, 32, 33, 36, 39, 37, 38, 36, 35, 37, 34, 36, 30, 31, 33, 33, 37, 36, 37, 38, 40, 44, 45, 47, 47, 46, 47, 47, 49, 52, 55, 55, 56, 59, 64, 66, 66, 68, 68, 68, 74, 72, 76, 72, 72, 70, 74, 76, 79, 80, 84, 80, 85, 85, 84, 87, 86, 90, 92, 88, 85, 89, 87, 88, 83, 90, 94, 98, 93, 93, 98, 96, 96, 92, 95, 95, 93, 92, 94, 95, 94, 96, 98, 100, 101, 97, 96, 94, 91, 95, 97, 96, 96, 102, 100, 101, 102, 101, 96, 108, 102, 103, 106, 104, 103, 105, 108, 106, 104, 104, 98, 96, 96, 96, 93, 94, 93, 94, 93, 88, 89, 93, 93, 91, 89, 91, 90, 92, 92, 93, 94, 88, 89, 86, 84, 83, 81, 82, 82, 80, 79, 78, 81, 82, 83, 83, 81, 83, 77, 77, 75, 73, 74, 71, 89, 100, 94, 89, 90, 86, 87, 86, 84, 83, 81, 78, 80, 77, 75, 65, 65, 68, 69, 66, 65, 61, 65, 64, 59, 61, 59, 51, 55, 55, 61, 56, 55, 55, 56, 56, 50, 52, 53, 49, 45, 43, 41, 40, 38, 35, 40, 32, 31, 34, 31, 35, 27, 24, 26, 24, 26, 30, 23, 28, 24, 23, 22, 21, 20, 1, 1, 1, 3, 1, 3, 4, 4, 3, 6, 7, 13, 10, 13, 10, 13, 10, 15, 16, 19, 19, 22, 21, 23, 24, 23, 21, 26, 24, 26, 29, 31, 30, 27, 30, 29, 29, 32, 35, 27, 30, 34, 40, 40, 38, 37, 38, 38, 34, 35, 36, 36, 33, 40, 38, 33, 39, 41, 43, 45, 45, 47, 51, 47, 47, 50, 48, 48, 49, 55, 58, 57, 60, 63, 65, 65, 68, 66, 68, 72, 76, 74, 73, 66, 71, 73, 77, 77, 81, 83, 81, 85, 85, 88, 84, 83, 85, 91, 89, 88, 89, 89, 89, 85, 89, 94, 93, 91, 96, 94, 94, 95, 94, 92, 93, 100, 100, 97, 94, 96, 96, 96, 95, 95, 94, 97, 94, 94, 94, 99, 101, 103, 105, 104, 102, 102, 98, 106, 103, 102, 98, 104, 106, 102, 97, 97, 94, 92, 91, 92, 92, 90, 92, 88, 93, 94, 95, 91, 89, 92, 92, 91, 85, 93, 89, 88, 88, 89, 87, 84, 83, 80, 87, 81, 78, 81, 78, 79, 82, 80, 78, 78, 79, 81, 76, 78, 78, 76, 74, 75, 75, 80, 98, 90, 87, 84, 84, 86, 86, 81, 80, 82, 78, 76, 80, 74, 71, 69, 65, 64, 60, 61, 60, 61, 63, 65, 57, 59, 58, 53, 50, 51, 57, 52, 55, 56, 54, 48, 46, 52, 53, 51, 45, 39, 35, 36, 37, 33, 31, 30, 33, 30, 29, 35, 29, 27, 28, 23, 23, 22, 22, 24, 23, 22, 21, 22, 21, 1, 1, 1, 2, 1, 3, 3, 4, 5, 5, 4, 7, 7, 13, 10, 13, 12, 15, 16, 23, 21, 22, 22, 24, 22, 28, 25, 27, 29, 32, 30, 29, 30, 28, 29, 30, 31, 28, 31, 35, 36, 36, 38, 37, 40, 40, 38, 35, 36, 40, 37, 38, 41, 39, 41, 46, 44, 45, 46, 43, 46, 50, 47, 52, 47, 48, 50, 48, 52, 58, 57, 63, 63, 61, 65, 64, 66, 75, 75, 74, 71, 66, 67, 70, 74, 76, 77, 81, 80, 82, 83, 85, 84, 84, 88, 89, 91, 88, 91, 89, 86, 87, 92, 89, 93, 89, 91, 94, 96, 93, 93, 93, 94, 97, 99, 98, 96, 95, 90, 96, 96, 100, 99, 97, 99, 100, 101, 102, 105, 107, 106, 105, 101, 103, 103, 102, 101, 100, 98, 101, 101, 96, 95, 92, 93, 89, 88, 90, 92, 89, 93, 93, 94, 90, 93, 94, 91, 93, 92, 91, 83, 90, 87, 88, 84, 83, 83, 84, 84, 81, 89, 81, 78, 81, 74, 80, 82, 81, 77, 78, 78, 79, 73, 77, 81, 77, 75, 81, 82, 86, 93, 85, 81, 82, 82, 85, 81, 80, 78, 78, 76, 75, 73, 70, 72, 67, 63, 62, 58, 57, 57, 60, 61, 65, 59, 57, 54, 56, 48, 51, 56, 53, 55, 51, 52, 48, 45, 48, 48, 45, 41, 39, 37, 35, 34, 35, 32, 32, 34, 30, 27, 29, 31, 30, 25, 23, 24, 22, 28, 24, 24, 18, 16, 23, 21, 1, 1, 1, 1, 2, 1, 1, 2, 2, 4, 6, 6, 8, 8, 9, 11, 15, 16, 14, 19, 22, 22, 21, 24, 26, 27, 23, 29, 27, 25, 26, 30, 26, 26, 33, 31, 29, 34, 34, 33, 36, 32, 35, 37, 40, 43, 46, 41, 46, 45, 44, 38, 45, 49, 43, 51, 47, 47, 48, 46, 46, 52, 51, 53, 50, 52, 44, 47, 49, 56, 56, 61, 59, 58, 60, 64, 70, 71, 73, 72, 67, 71, 69, 67, 70, 78, 78, 78, 79, 83, 83, 82, 83, 87, 89, 90, 89, 89, 88, 90, 88, 83, 88, 88, 94, 95, 92, 95, 96, 92, 94, 95, 96, 96, 101, 102, 101, 97, 92, 94, 99, 102, 103, 103, 110, 107, 105, 108, 108, 110, 105, 103, 101, 110, 104, 101, 98, 95, 97, 93, 94, 93, 94, 90, 88, 86, 86, 90, 89, 91, 94, 93, 92, 87, 93, 91, 93, 94, 90, 92, 86, 86, 91, 88, 82, 84, 88, 88, 87, 83, 87, 85, 80, 83, 75, 80, 80, 80, 81, 79, 78, 75, 73, 81, 83, 80, 81, 83, 86, 90, 88, 85, 81, 83, 81, 85, 79, 76, 74, 79, 73, 72, 71, 72, 69, 64, 63, 60, 59, 57, 57, 61, 61, 63, 62, 56, 50, 53, 49, 50, 50, 52, 53, 42, 49, 46, 41, 47, 46, 40, 37, 39, 42, 31, 33, 33, 33, 32, 28, 29, 24, 27, 30, 24, 26, 24, 26, 23, 25, 25, 24, 19, 18, 22, 21, 1, 1, 2, 1, 1, 3, 5, 6, 8, 9, 8, 13, 14, 13, 14, 16, 18, 21, 22, 24, 24, 25, 24, 24, 26, 23, 28, 26, 24, 28, 32, 34, 28, 33, 36, 31, 35, 34, 34, 37, 40, 44, 45, 47, 50, 53, 50, 45, 47, 54, 51, 53, 53, 52, 52, 49, 49, 53, 54, 51, 50, 50, 48, 48, 51, 51, 56, 58, 59, 61, 61, 66, 68, 66, 68, 67, 65, 68, 71, 69, 72, 76, 73, 74, 78, 83, 83, 84, 84, 84, 86, 94, 88, 88, 86, 93, 90, 86, 87, 90, 88, 94, 94, 97, 97, 92, 95, 100, 97, 94, 98, 104, 101, 101, 99, 97, 99, 103, 103, 106, 106, 107, 105, 112, 106, 106, 105, 101, 100, 105, 102, 100, 98, 94, 95, 94, 93, 93, 91, 83, 88, 92, 90, 91, 90, 91, 92, 97, 92, 91, 93, 93, 96, 94, 91, 92, 88, 84, 88, 86, 82, 86, 88, 88, 89, 85, 88, 86, 84, 85, 78, 80, 82, 82, 81, 83, 82, 77, 84, 90, 85, 85, 85, 84, 85, 87, 85, 82, 80, 79, 80, 79, 72, 72, 72, 78, 75, 72, 70, 68, 65, 62, 62, 61, 58, 59, 56, 57, 58, 62, 60, 57, 55, 52, 49, 50, 48, 51, 53, 43, 47, 44, 42, 46, 47, 41, 33, 36, 39, 31, 33, 33, 36, 32, 29, 26, 21, 27, 34, 27, 25, 25, 25, 23, 21, 20, 27, 21, 22, 20, 18, 1, 1, 2, 1, 2, 3, 1, 1, 6, 13, 10, 9, 14, 13, 12, 14, 15, 18, 21, 20, 25, 23, 23, 27, 22, 24, 23, 30, 23, 25, 29, 29, 33, 27, 32, 36, 32, 34, 35, 37, 42, 41, 41, 40, 47, 48, 51, 51, 49, 47, 51, 54, 54, 52, 50, 51, 50, 50, 50, 53, 53, 55, 53, 50, 49, 55, 55, 55, 56, 56, 62, 64, 64, 65, 64, 67, 67, 72, 69, 73, 72, 69, 68, 68, 71, 74, 78, 82, 85, 84, 84, 89, 95, 96, 88, 88, 92, 89, 90, 91, 95, 92, 93, 94, 97, 97, 97, 98, 101, 99, 97, 98, 106, 100, 104, 102, 103, 104, 103, 101, 103, 104, 105, 104, 108, 107, 101, 100, 100, 102, 100, 103, 97, 94, 95, 96, 97, 93, 90, 83, 83, 92, 95, 95, 95, 92, 94, 92, 99, 94, 96, 95, 94, 97, 94, 89, 88, 84, 82, 86, 85, 83, 85, 88, 86, 89, 91, 87, 91, 87, 85, 85, 85, 84, 83, 83, 86, 86, 87, 92, 95, 87, 84, 88, 86, 85, 86, 83, 79, 77, 70, 74, 74, 68, 70, 71, 71, 77, 77, 69, 64, 65, 60, 60, 62, 57, 56, 59, 56, 56, 61, 61, 56, 60, 52, 48, 48, 50, 53, 48, 45, 46, 43, 44, 44, 46, 36, 35, 38, 36, 31, 33, 31, 32, 30, 31, 25, 22, 30, 33, 32, 27, 24, 24, 26, 21, 18, 23, 23, 21, 20, 16, 1, 2, 1, 1, 1, 2, 4, 2, 2, 7, 13, 10, 12, 12, 13, 13, 16, 20, 23, 22, 22, 27, 21, 26, 26, 23, 23, 30, 23, 30, 36, 33, 36, 32, 36, 36, 37, 34, 34, 37, 42, 41, 39, 41, 44, 50, 48, 50, 47, 49, 46, 50, 53, 49, 45, 47, 49, 49, 47, 49, 55, 60, 57, 53, 53, 55, 59, 57, 60, 55, 56, 61, 63, 63, 64, 66, 65, 68, 62, 71, 71, 72, 72, 68, 65, 69, 71, 83, 86, 84, 85, 86, 89, 94, 90, 95, 92, 97, 94, 96, 90, 90, 92, 94, 95, 94, 93, 99, 99, 99, 97, 98, 102, 103, 105, 106, 101, 107, 103, 100, 96, 101, 98, 106, 102, 104, 97, 100, 100, 98, 94, 98, 94, 94, 97, 96, 96, 94, 91, 82, 91, 99, 96, 98, 97, 92, 98, 94, 93, 90, 96, 97, 96, 93, 95, 91, 90, 91, 89, 86, 79, 82, 84, 88, 89, 87, 90, 89, 96, 86, 88, 92, 87, 81, 83, 84, 83, 87, 91, 93, 94, 90, 85, 86, 85, 86, 84, 80, 78, 73, 74, 75, 73, 68, 68, 71, 71, 75, 74, 72, 65, 64, 62, 59, 63, 61, 57, 62, 54, 54, 57, 58, 53, 58, 50, 50, 48, 51, 51, 44, 44, 42, 41, 43, 42, 42, 36, 34, 33, 34, 34, 30, 31, 28, 27, 31, 26, 29, 34, 29, 26, 21, 23, 25, 26, 20, 22, 20, 22, 19, 16, 13, 1, 1, 1, 1, 1, 2, 1, 1, 1, 3, 2, 1, 3, 5, 9, 9, 12, 13, 11, 14, 18, 21, 24, 22, 24, 21, 25, 24, 25, 23, 28, 25, 28, 35, 32, 34, 33, 37, 33, 38, 37, 37, 37, 39, 38, 37, 40, 42, 48, 45, 51, 51, 50, 49, 47, 51, 50, 48, 49, 51, 50, 48, 45, 51, 57, 55, 52, 59, 58, 60, 58, 62, 60, 55, 58, 61, 61, 64, 65, 63, 67, 68, 69, 66, 67, 72, 66, 65, 70, 69, 73, 80, 86, 91, 92, 87, 92, 89, 89, 93, 94, 91, 99, 93, 90, 92, 92, 93, 92, 91, 98, 98, 99, 99, 96, 98, 102, 104, 106, 101, 102, 98, 98, 94, 95, 92, 107, 101, 101, 98, 100, 97, 96, 94, 93, 94, 97, 96, 95, 93, 94, 92, 89, 98, 105, 101, 101, 100, 99, 96, 92, 90, 89, 94, 93, 95, 93, 91, 91, 91, 92, 90, 84, 85, 87, 83, 87, 90, 89, 88, 91, 93, 85, 88, 91, 88, 88, 84, 82, 86, 86, 87, 89, 90, 87, 84, 83, 84, 84, 82, 78, 79, 77, 76, 72, 70, 63, 65, 69, 68, 70, 68, 68, 63, 61, 62, 58, 61, 62, 60, 59, 51, 55, 57, 58, 54, 53, 48, 52, 51, 50, 48, 47, 44, 41, 44, 41, 40, 38, 38, 31, 29, 33, 30, 30, 35, 31, 31, 32, 27, 30, 28, 30, 25, 22, 25, 25, 20, 21, 28, 22, 22, 19, 19, 16, 1, 1, 1, 1, 2, 1, 1, 1, 2, 2, 3, 4, 9, 9, 9, 13, 10, 8, 11, 15, 17, 21, 24, 23, 24, 27, 27, 26, 26, 26, 25, 28, 34, 34, 38, 43, 38, 30, 36, 38, 38, 39, 38, 40, 37, 38, 44, 47, 43, 45, 48, 49, 51, 54, 53, 52, 51, 50, 51, 50, 48, 45, 49, 56, 54, 55, 60, 60, 63, 59, 61, 65, 60, 63, 60, 60, 63, 64, 62, 63, 69, 63, 65, 68, 69, 66, 64, 68, 69, 77, 82, 84, 88, 90, 87, 89, 88, 87, 94, 94, 93, 96, 92, 89, 95, 92, 94, 95, 92, 92, 91, 92, 97, 96, 97, 100, 101, 101, 104, 101, 97, 96, 93, 97, 94, 101, 98, 98, 96, 95, 95, 95, 94, 93, 92, 91, 92, 91, 88, 88, 87, 92, 106, 105, 103, 102, 106, 104, 96, 94, 93, 91, 94, 88, 89, 91, 90, 92, 93, 95, 92, 87, 93, 92, 90, 91, 96, 93, 91, 92, 92, 88, 88, 90, 89, 92, 87, 83, 84, 84, 86, 86, 86, 84, 82, 84, 86, 85, 82, 80, 82, 79, 75, 69, 67, 64, 64, 68, 62, 66, 67, 66, 60, 60, 57, 57, 58, 56, 56, 57, 52, 58, 58, 59, 52, 49, 46, 48, 48, 52, 46, 47, 43, 42, 46, 39, 38, 37, 36, 31, 34, 32, 26, 28, 35, 30, 31, 29, 26, 29, 27, 28, 26, 26, 28, 26, 19, 25, 26, 22, 25, 20, 19, 18, 1, 1, 1, 1, 1, 2, 1, 2, 1, 1, 2, 5, 7, 7, 8, 6, 9, 13, 14, 18, 19, 22, 25, 26, 25, 24, 27, 25, 25, 30, 31, 32, 34, 39, 36, 32, 33, 38, 37, 40, 40, 42, 40, 37, 42, 44, 45, 40, 46, 48, 49, 57, 56, 52, 53, 52, 52, 52, 50, 47, 48, 52, 49, 57, 57, 57, 63, 61, 61, 63, 64, 67, 63, 62, 60, 63, 62, 61, 68, 66, 65, 68, 67, 67, 66, 64, 70, 76, 83, 83, 87, 95, 90, 88, 89, 89, 93, 92, 91, 91, 91, 89, 93, 92, 93, 96, 93, 93, 98, 95, 91, 89, 91, 94, 99, 100, 98, 97, 97, 91, 90, 92, 94, 95, 92, 92, 91, 88, 90, 91, 86, 88, 89, 88, 91, 86, 83, 90, 94, 101, 103, 103, 103, 102, 104, 102, 98, 95, 94, 93, 93, 85, 89, 92, 88, 92, 91, 93, 92, 91, 96, 93, 98, 96, 100, 96, 94, 94, 97, 90, 93, 93, 91, 90, 91, 86, 80, 84, 87, 84, 84, 85, 81, 82, 84, 82, 82, 79, 78, 74, 71, 70, 65, 64, 65, 68, 66, 66, 64, 63, 59, 57, 58, 55, 56, 55, 56, 55, 54, 55, 52, 52, 50, 48, 45, 44, 42, 50, 46, 45, 42, 42, 45, 37, 39, 40, 39, 34, 32, 29, 30, 30, 36, 30, 31, 32, 29, 31, 30, 26, 27, 28, 30, 28, 22, 27, 23, 23, 23, 18, 19, 22, 1, 1, 2, 2, 1, 2, 2, 3, 2, 1, 2, 4, 6, 8, 11, 13, 10, 14, 11, 16, 18, 20, 23, 24, 23, 24, 25, 25, 26, 32, 31, 32, 32, 34, 35, 37, 33, 36, 37, 42, 43, 41, 39, 35, 42, 40, 43, 41, 46, 46, 45, 51, 54, 51, 52, 55, 51, 52, 53, 50, 46, 50, 50, 55, 54, 53, 61, 61, 60, 60, 65, 66, 65, 63, 58, 63, 64, 64, 64, 69, 66, 68, 67, 65, 68, 69, 69, 74, 80, 81, 84, 94, 94, 93, 91, 89, 92, 91, 89, 91, 89, 89, 90, 94, 94, 94, 95, 92, 94, 94, 88, 90, 89, 90, 92, 92, 93, 92, 92, 89, 91, 89, 93, 96, 91, 91, 96, 92, 89, 88, 89, 86, 86, 85, 89, 85, 88, 101, 104, 102, 99, 98, 96, 100, 102, 98, 98, 94, 94, 96, 92, 89, 87, 95, 91, 92, 94, 91, 94, 97, 94, 95, 96, 100, 101, 97, 93, 97, 93, 91, 95, 94, 92, 91, 88, 88, 83, 84, 83, 83, 83, 83, 81, 81, 83, 83, 81, 72, 74, 70, 66, 67, 65, 68, 67, 66, 66, 62, 64, 62, 59, 57, 58, 51, 53, 52, 55, 58, 53, 50, 48, 49, 47, 45, 42, 44, 41, 47, 45, 43, 41, 39, 41, 36, 40, 38, 38, 32, 28, 28, 31, 34, 33, 29, 29, 32, 31, 32, 29, 27, 29, 29, 26, 26, 27, 27, 22, 24, 20, 16, 17, 19, 2, 2, 3, 5, 2, 2, 3, 2, 2, 3, 2, 1, 3, 2, 1, 6, 13, 10, 15, 14, 11, 15, 13, 10, 15, 20, 22, 23, 24, 23, 25, 24, 23, 29, 30, 25, 30, 30, 32, 35, 37, 35, 37, 43, 38, 41, 41, 42, 42, 45, 40, 41, 46, 42, 45, 46, 48, 49, 50, 55, 58, 53, 53, 56, 51, 50, 49, 48, 53, 51, 51, 62, 63, 61, 59, 61, 62, 65, 62, 60, 63, 64, 68, 67, 71, 69, 69, 71, 69, 69, 70, 68, 74, 76, 79, 81, 90, 91, 93, 89, 91, 90, 91, 91, 95, 91, 89, 90, 93, 94, 90, 91, 90, 88, 91, 88, 90, 88, 86, 85, 87, 86, 89, 89, 97, 101, 99, 100, 99, 94, 93, 99, 94, 93, 88, 93, 85, 88, 81, 84, 93, 102, 105, 102, 102, 97, 96, 98, 94, 96, 96, 94, 95, 95, 97, 94, 94, 91, 98, 99, 95, 99, 92, 96, 101, 93, 100, 96, 102, 99, 94, 94, 95, 92, 93, 92, 98, 92, 91, 86, 89, 84, 82, 81, 81, 79, 80, 80, 79, 81, 83, 83, 76, 73, 68, 65, 67, 67, 67, 65, 64, 66, 62, 62, 62, 62, 59, 54, 51, 52, 48, 52, 49, 48, 52, 53, 55, 49, 44, 38, 41, 40, 49, 45, 42, 40, 36, 40, 35, 41, 36, 38, 33, 29, 31, 32, 34, 28, 30, 30, 28, 32, 34, 32, 31, 29, 27, 25, 24, 24, 24, 23, 23, 21, 18, 17, 16, 3, 1, 1, 4, 4, 5, 5, 3, 3, 4, 5, 4, 7, 9, 5, 9, 9, 11, 15, 12, 15, 11, 17, 22, 24, 24, 24, 23, 26, 23, 24, 29, 29, 27, 30, 27, 29, 37, 37, 35, 37, 39, 40, 43, 42, 43, 44, 43, 46, 43, 47, 41, 48, 47, 50, 51, 49, 54, 56, 55, 56, 61, 54, 59, 50, 45, 49, 46, 49, 61, 59, 61, 58, 61, 60, 65, 62, 62, 63, 63, 69, 71, 75, 75, 73, 72, 76, 72, 69, 68, 70, 70, 75, 79, 82, 86, 91, 88, 92, 89, 92, 92, 94, 91, 88, 91, 91, 94, 88, 89, 87, 88, 91, 89, 89, 86, 85, 88, 93, 88, 92, 95, 101, 102, 102, 105, 98, 97, 99, 97, 92, 99, 95, 95, 94, 98, 94, 93, 108, 110, 103, 100, 103, 104, 96, 95, 92, 96, 98, 94, 96, 97, 98, 98, 100, 99, 105, 101, 103, 101, 99, 96, 98, 97, 103, 100, 97, 96, 94, 94, 91, 92, 89, 85, 92, 90, 87, 86, 90, 84, 83, 85, 81, 78, 80, 76, 76, 80, 79, 72, 67, 72, 68, 66, 68, 66, 68, 65, 65, 65, 61, 60, 61, 63, 58, 52, 51, 54, 51, 50, 48, 54, 53, 51, 52, 48, 44, 39, 44, 43, 51, 44, 40, 39, 36, 38, 35, 38, 37, 38, 35, 32, 33, 28, 29, 27, 31, 29, 27, 35, 32, 37, 32, 27, 26, 27, 22, 21, 22, 25, 22, 23, 21, 19, 17, 2, 2, 4, 7, 6, 2, 2, 3, 13, 10, 8, 5, 9, 5, 7, 7, 9, 14, 15, 15, 15, 17, 21, 23, 25, 25, 23, 25, 24, 26, 27, 27, 28, 33, 33, 37, 37, 36, 35, 37, 41, 42, 43, 42, 43, 41, 40, 46, 45, 45, 45, 49, 47, 48, 55, 51, 56, 58, 59, 59, 64, 59, 62, 53, 52, 55, 49, 52, 60, 58, 59, 56, 60, 60, 64, 63, 65, 64, 63, 67, 68, 69, 71, 74, 75, 75, 69, 72, 68, 65, 69, 74, 82, 81, 83, 87, 86, 92, 88, 90, 91, 91, 90, 86, 90, 87, 92, 88, 91, 87, 90, 91, 91, 85, 85, 84, 87, 89, 92, 94, 101, 105, 103, 102, 106, 103, 104, 103, 99, 103, 105, 105, 101, 105, 105, 111, 114, 114, 111, 107, 106, 102, 104, 102, 100, 95, 93, 101, 99, 100, 97, 101, 102, 103, 102, 105, 99, 100, 99, 102, 99, 98, 96, 95, 97, 98, 94, 95, 90, 92, 88, 89, 87, 85, 89, 88, 87, 86, 86, 83, 86, 85, 81, 78, 75, 72, 71, 70, 69, 69, 65, 64, 65, 63, 65, 65, 67, 69, 63, 62, 60, 62, 57, 56, 51, 52, 54, 49, 50, 53, 57, 48, 52, 50, 51, 48, 45, 48, 44, 44, 40, 40, 36, 37, 39, 40, 39, 40, 40, 37, 33, 35, 30, 32, 33, 33, 28, 29, 33, 31, 34, 27, 30, 28, 25, 23, 23, 23, 24, 19, 22, 20, 15, 17, 1, 1, 2, 4, 5, 3, 2, 6, 8, 5, 4, 7, 6, 7, 7, 13, 10, 12, 14, 15, 14, 14, 19, 21, 24, 26, 24, 24, 25, 26, 25, 29, 32, 35, 34, 36, 35, 35, 36, 37, 46, 41, 42, 43, 43, 43, 46, 45, 45, 47, 48, 49, 51, 48, 51, 48, 56, 61, 60, 59, 59, 62, 62, 58, 56, 56, 50, 48, 52, 54, 60, 57, 57, 59, 62, 61, 65, 64, 65, 65, 65, 66, 67, 73, 76, 76, 70, 72, 68, 68, 72, 73, 81, 79, 86, 88, 87, 90, 91, 88, 91, 93, 91, 89, 91, 89, 89, 87, 89, 89, 93, 92, 91, 88, 83, 81, 85, 90, 96, 96, 104, 105, 106, 104, 108, 109, 107, 103, 102, 107, 107, 114, 112, 116, 112, 118, 120, 115, 116, 109, 105, 106, 107, 102, 101, 101, 99, 100, 104, 101, 95, 101, 102, 104, 102, 103, 98, 96, 96, 99, 99, 98, 93, 92, 93, 97, 91, 91, 92, 92, 90, 93, 88, 88, 90, 86, 87, 84, 83, 82, 86, 87, 83, 75, 74, 75, 67, 67, 68, 66, 65, 63, 65, 62, 67, 64, 69, 71, 63, 63, 59, 61, 55, 56, 52, 53, 51, 45, 50, 54, 53, 49, 54, 50, 54, 51, 48, 47, 43, 44, 41, 42, 38, 38, 39, 42, 39, 41, 37, 36, 37, 37, 34, 38, 38, 32, 30, 31, 30, 33, 31, 30, 32, 26, 24, 27, 22, 22, 23, 19, 23, 20, 13, 17, 1, 2, 3, 4, 5, 3, 6, 5, 4, 5, 6, 13, 10, 11, 9, 13, 10, 14, 12, 13, 13, 10, 13, 18, 19, 22, 24, 23, 24, 27, 25, 26, 31, 31, 34, 34, 37, 36, 33, 36, 38, 43, 41, 43, 43, 44, 47, 48, 47, 47, 48, 52, 50, 53, 51, 49, 49, 53, 60, 58, 56, 58, 62, 62, 60, 60, 63, 60, 50, 47, 52, 57, 57, 56, 58, 61, 59, 62, 61, 65, 63, 64, 71, 68, 69, 71, 75, 72, 71, 70, 72, 73, 72, 76, 78, 87, 89, 88, 90, 96, 92, 92, 95, 90, 90, 88, 90, 88, 87, 88, 92, 91, 92, 93, 93, 84, 83, 90, 97, 101, 100, 104, 105, 105, 102, 106, 107, 103, 104, 104, 107, 110, 117, 117, 117, 118, 116, 115, 117, 114, 109, 106, 104, 109, 104, 107, 107, 104, 97, 104, 101, 97, 103, 104, 103, 101, 99, 93, 94, 95, 95, 94, 95, 93, 91, 92, 93, 89, 91, 91, 92, 91, 95, 88, 91, 85, 84, 83, 81, 83, 80, 83, 82, 83, 77, 73, 72, 67, 69, 68, 67, 69, 69, 64, 67, 69, 68, 72, 70, 61, 61, 58, 64, 56, 60, 56, 53, 51, 48, 50, 57, 52, 51, 52, 53, 51, 52, 50, 48, 47, 48, 43, 40, 39, 39, 39, 39, 37, 38, 37, 35, 38, 39, 39, 39, 37, 33, 34, 33, 30, 32, 26, 32, 26, 25, 27, 27, 23, 23, 21, 19, 22, 19, 18, 21, 1, 1, 2, 4, 3, 5, 8, 6, 5, 6, 9, 14, 12, 11, 12, 11, 12, 12, 14, 19, 21, 21, 20, 22, 25, 27, 23, 25, 33, 33, 30, 31, 34, 36, 32, 36, 39, 40, 38, 43, 41, 42, 45, 48, 44, 49, 50, 50, 51, 52, 51, 54, 53, 53, 57, 56, 56, 58, 62, 65, 59, 62, 66, 63, 60, 50, 43, 53, 60, 60, 64, 63, 60, 61, 63, 67, 63, 64, 70, 71, 65, 67, 72, 75, 70, 70, 73, 71, 74, 79, 81, 83, 86, 85, 86, 92, 90, 91, 92, 85, 89, 83, 90, 90, 92, 86, 91, 91, 93, 93, 95, 92, 89, 99, 101, 105, 104, 105, 103, 102, 103, 106, 106, 99, 101, 104, 101, 112, 110, 112, 109, 115, 110, 106, 114, 110, 108, 105, 108, 110, 107, 109, 110, 106, 102, 106, 106, 102, 102, 102, 107, 102, 98, 92, 97, 96, 93, 93, 95, 94, 91, 93, 94, 93, 91, 91, 91, 93, 96, 90, 90, 85, 87, 82, 85, 82, 82, 80, 83, 80, 81, 78, 78, 74, 74, 73, 73, 73, 71, 69, 69, 74, 71, 68, 68, 63, 62, 61, 63, 58, 60, 57, 54, 52, 54, 55, 56, 51, 52, 53, 54, 50, 49, 49, 48, 45, 43, 44, 38, 38, 39, 40, 41, 36, 39, 40, 37, 37, 42, 39, 37, 38, 39, 38, 36, 33, 35, 28, 30, 27, 27, 27, 27, 24, 26, 19, 14, 23, 20, 20, 22, 1, 1, 2, 3, 4, 3, 3, 6, 7, 3, 5, 13, 10, 11, 12, 11, 13, 13, 13, 15, 18, 20, 20, 21, 25, 25, 22, 25, 25, 32, 32, 30, 28, 32, 35, 34, 38, 38, 38, 38, 42, 42, 42, 43, 50, 46, 50, 52, 52, 52, 56, 55, 56, 57, 55, 54, 54, 60, 62, 61, 63, 60, 64, 63, 68, 69, 68, 60, 62, 69, 67, 69, 66, 64, 68, 68, 72, 68, 64, 66, 74, 69, 69, 70, 76, 68, 69, 76, 73, 74, 75, 76, 79, 82, 82, 86, 91, 89, 90, 93, 87, 89, 85, 91, 90, 88, 85, 85, 87, 93, 92, 95, 98, 93, 97, 99, 104, 105, 107, 102, 98, 101, 107, 105, 99, 106, 105, 101, 103, 102, 107, 108, 112, 109, 103, 105, 106, 107, 104, 106, 109, 108, 109, 107, 106, 103, 107, 109, 105, 102, 102, 101, 100, 97, 94, 97, 95, 94, 93, 94, 92, 95, 96, 95, 96, 96, 92, 90, 94, 91, 87, 86, 81, 83, 81, 86, 83, 85, 82, 87, 83, 81, 81, 79, 76, 78, 74, 76, 75, 74, 75, 75, 75, 77, 76, 69, 65, 68, 61, 62, 63, 61, 56, 55, 54, 55, 56, 55, 56, 55, 51, 50, 48, 47, 49, 46, 42, 40, 44, 40, 38, 40, 40, 37, 37, 41, 41, 35, 36, 45, 41, 39, 34, 38, 38, 38, 34, 35, 32, 32, 31, 31, 27, 24, 26, 23, 26, 22, 19, 20, 17, 19, 1, 1, 3, 4, 5, 3, 4, 5, 5, 7, 12, 11, 12, 15, 12, 16, 14, 11, 14, 19, 19, 19, 22, 25, 24, 23, 28, 25, 27, 33, 33, 29, 30, 30, 30, 35, 36, 37, 36, 42, 42, 40, 41, 49, 47, 47, 50, 53, 56, 57, 57, 56, 58, 52, 54, 53, 60, 60, 61, 63, 65, 65, 68, 70, 70, 78, 78, 73, 77, 78, 75, 71, 67, 71, 73, 76, 73, 76, 74, 71, 67, 72, 70, 78, 70, 68, 68, 68, 74, 77, 78, 77, 79, 79, 85, 85, 84, 91, 88, 86, 90, 89, 91, 87, 83, 85, 84, 85, 90, 93, 95, 97, 93, 94, 100, 101, 105, 105, 99, 95, 97, 104, 99, 97, 100, 94, 101, 97, 103, 98, 106, 107, 107, 103, 107, 105, 104, 104, 104, 106, 105, 106, 106, 109, 107, 108, 105, 101, 100, 100, 96, 100, 96, 102, 104, 99, 95, 95, 97, 92, 95, 95, 96, 92, 94, 95, 91, 90, 87, 84, 84, 83, 83, 85, 85, 81, 82, 84, 88, 85, 83, 87, 84, 78, 79, 73, 71, 73, 76, 76, 78, 73, 79, 78, 74, 67, 65, 65, 64, 55, 59, 56, 55, 57, 56, 56, 59, 59, 57, 50, 50, 48, 48, 47, 42, 40, 40, 41, 41, 37, 38, 41, 39, 41, 40, 39, 34, 40, 44, 34, 38, 33, 39, 37, 36, 36, 35, 36, 34, 31, 34, 28, 25, 28, 21, 26, 25, 21, 22, 16, 16, 1, 3, 5, 6, 4, 4, 3, 3, 5, 8, 9, 13, 10, 18, 12, 15, 14, 13, 16, 22, 23, 20, 22, 22, 23, 26, 25, 27, 27, 33, 34, 34, 32, 32, 32, 31, 38, 36, 36, 39, 41, 39, 42, 48, 47, 50, 51, 56, 55, 55, 58, 54, 62, 60, 57, 53, 60, 59, 63, 66, 67, 67, 71, 69, 69, 72, 76, 77, 81, 83, 78, 80, 73, 74, 78, 78, 78, 77, 77, 73, 70, 73, 71, 73, 69, 70, 68, 65, 71, 76, 75, 77, 76, 78, 82, 82, 83, 86, 88, 89, 89, 90, 89, 87, 83, 84, 79, 81, 84, 89, 91, 88, 92, 95, 97, 100, 100, 100, 98, 96, 97, 102, 101, 100, 97, 92, 99, 97, 97, 94, 103, 104, 102, 102, 104, 103, 103, 109, 111, 111, 105, 104, 105, 104, 102, 103, 105, 103, 102, 101, 104, 106, 99, 100, 103, 100, 95, 96, 97, 93, 93, 94, 97, 94, 96, 94, 91, 93, 90, 85, 83, 82, 83, 85, 82, 83, 85, 90, 89, 84, 80, 82, 85, 78, 76, 76, 75, 77, 79, 78, 79, 75, 76, 75, 76, 70, 69, 66, 63, 61, 61, 58, 58, 61, 60, 61, 63, 57, 56, 54, 53, 49, 47, 44, 42, 44, 44, 40, 40, 36, 37, 40, 43, 42, 38, 40, 38, 44, 42, 35, 39, 37, 39, 38, 37, 36, 36, 36, 32, 31, 30, 28, 29, 26, 22, 22, 21, 23, 22, 15, 14, 1, 1, 5, 6, 4, 1, 3, 6, 7, 9, 9, 16, 12, 17, 17, 18, 17, 22, 24, 24, 24, 21, 22, 25, 25, 26, 26, 32, 35, 33, 32, 32, 35, 29, 35, 33, 37, 36, 40, 44, 44, 44, 44, 50, 50, 55, 51, 55, 60, 55, 60, 59, 58, 55, 57, 60, 61, 63, 67, 66, 68, 68, 70, 69, 70, 76, 81, 79, 79, 79, 74, 75, 78, 75, 81, 79, 80, 80, 78, 73, 72, 69, 68, 69, 68, 66, 68, 70, 71, 76, 76, 80, 81, 82, 82, 85, 84, 85, 86, 86, 86, 88, 84, 87, 83, 80, 78, 84, 85, 85, 92, 93, 93, 96, 96, 95, 96, 96, 94, 99, 100, 99, 96, 95, 96, 100, 95, 100, 99, 98, 101, 101, 105, 105, 106, 108, 107, 111, 103, 105, 111, 106, 102, 104, 109, 105, 106, 103, 110, 108, 103, 108, 106, 103, 97, 95, 90, 87, 87, 95, 93, 84, 93, 93, 90, 93, 91, 90, 89, 90, 90, 89, 85, 86, 85, 85, 84, 80, 80, 82, 83, 83, 77, 76, 78, 81, 81, 84, 81, 77, 78, 79, 76, 70, 70, 66, 62, 61, 63, 64, 62, 64, 63, 65, 60, 60, 58, 54, 52, 49, 47, 43, 43, 46, 47, 43, 41, 38, 39, 39, 44, 45, 41, 41, 41, 42, 39, 40, 40, 36, 36, 38, 34, 35, 36, 35, 29, 30, 29, 26, 26, 25, 25, 23, 21, 20, 19, 17, 16, 1, 1, 1, 1, 2, 2, 3, 3, 1, 5, 6, 11, 13, 10, 14, 12, 17, 17, 18, 16, 20, 23, 25, 25, 22, 22, 25, 29, 23, 24, 33, 34, 29, 29, 32, 37, 33, 36, 36, 37, 36, 39, 47, 44, 42, 44, 48, 50, 52, 50, 53, 57, 58, 61, 61, 57, 54, 53, 59, 57, 62, 67, 62, 67, 66, 64, 67, 69, 72, 74, 79, 79, 68, 76, 74, 80, 76, 77, 78, 81, 77, 81, 74, 75, 74, 71, 67, 68, 67, 66, 66, 70, 72, 75, 77, 78, 82, 80, 84, 83, 83, 85, 83, 85, 90, 86, 86, 89, 84, 75, 78, 82, 85, 90, 90, 94, 92, 91, 92, 93, 91, 93, 95, 97, 96, 95, 97, 95, 99, 99, 101, 95, 94, 99, 102, 104, 104, 106, 106, 108, 111, 105, 106, 111, 108, 106, 107, 113, 109, 109, 108, 109, 105, 105, 111, 104, 106, 105, 102, 93, 86, 86, 96, 94, 90, 88, 91, 92, 94, 93, 94, 91, 93, 91, 92, 88, 90, 87, 84, 82, 83, 82, 81, 78, 83, 82, 80, 83, 82, 83, 87, 82, 78, 82, 80, 77, 71, 67, 68, 66, 63, 66, 65, 66, 66, 65, 65, 58, 65, 58, 54, 49, 50, 49, 44, 44, 45, 49, 46, 43, 43, 39, 41, 47, 48, 44, 42, 45, 42, 42, 39, 37, 36, 38, 38, 30, 36, 32, 34, 27, 27, 30, 24, 23, 26, 26, 22, 24, 21, 18, 18, 17, 1, 1, 1, 1, 2, 1, 3, 3, 3, 1, 2, 2, 6, 13, 10, 13, 10, 11, 12, 15, 15, 18, 19, 22, 24, 24, 25, 22, 25, 25, 25, 25, 27, 31, 32, 31, 32, 34, 35, 35, 38, 36, 34, 40, 39, 41, 44, 42, 45, 43, 50, 50, 49, 54, 54, 58, 57, 62, 55, 54, 52, 59, 57, 60, 63, 63, 67, 65, 63, 67, 70, 70, 72, 77, 73, 72, 78, 74, 77, 74, 74, 77, 81, 76, 81, 81, 79, 76, 71, 69, 65, 61, 65, 70, 72, 69, 75, 70, 72, 78, 78, 85, 81, 79, 86, 83, 85, 92, 90, 87, 90, 90, 89, 78, 84, 90, 95, 93, 94, 90, 89, 88, 87, 85, 91, 88, 96, 94, 92, 99, 98, 95, 100, 95, 98, 97, 96, 103, 101, 102, 107, 105, 110, 105, 106, 108, 110, 111, 107, 106, 111, 113, 108, 111, 108, 104, 106, 108, 106, 111, 109, 108, 109, 105, 101, 101, 101, 97, 93, 93, 96, 96, 94, 94, 90, 95, 93, 95, 88, 91, 88, 86, 85, 90, 85, 82, 84, 80, 88, 83, 81, 83, 89, 87, 84, 84, 87, 79, 77, 74, 69, 67, 66, 69, 67, 67, 70, 68, 67, 65, 58, 63, 56, 57, 50, 50, 49, 45, 47, 47, 50, 47, 42, 46, 40, 46, 49, 45, 48, 46, 44, 40, 44, 38, 37, 39, 40, 36, 37, 36, 27, 33, 29, 26, 25, 24, 26, 24, 23, 20, 25, 20, 19, 18, 17, 1, 2, 1, 2, 1, 2, 4, 2, 1, 1, 2, 2, 6, 8, 9, 7, 14, 17, 14, 17, 23, 20, 24, 24, 23, 27, 24, 27, 26, 27, 27, 29, 32, 28, 30, 30, 33, 33, 35, 38, 35, 29, 37, 36, 38, 39, 43, 47, 48, 48, 44, 48, 57, 52, 58, 55, 59, 60, 57, 57, 57, 54, 55, 62, 62, 63, 66, 66, 65, 68, 72, 73, 72, 72, 75, 74, 76, 74, 78, 81, 78, 81, 77, 76, 83, 81, 83, 74, 72, 71, 66, 63, 67, 70, 71, 70, 71, 67, 73, 81, 86, 83, 82, 81, 79, 84, 91, 92, 87, 89, 93, 98, 99, 94, 90, 89, 93, 93, 93, 90, 87, 81, 77, 87, 86, 93, 92, 94, 96, 99, 94, 100, 95, 104, 95, 101, 103, 101, 104, 102, 104, 104, 104, 105, 101, 107, 108, 102, 108, 110, 109, 108, 108, 105, 107, 109, 107, 111, 106, 110, 110, 112, 116, 107, 107, 104, 100, 99, 96, 100, 94, 91, 94, 93, 98, 90, 92, 88, 90, 92, 91, 88, 90, 83, 81, 92, 83, 87, 89, 81, 87, 90, 92, 90, 86, 86, 82, 82, 75, 70, 68, 74, 68, 69, 63, 66, 67, 63, 66, 64, 63, 56, 60, 55, 54, 52, 49, 50, 46, 48, 49, 43, 41, 43, 48, 46, 44, 48, 43, 41, 39, 41, 40, 39, 39, 37, 37, 40, 30, 29, 32, 29, 28, 26, 28, 26, 27, 20, 24, 22, 22, 20, 19, 16, 2, 1, 1, 1, 1, 1, 2, 3, 2, 1, 2, 5, 3, 9, 9, 13, 10, 8, 16, 13, 16, 16, 16, 20, 25, 23, 18, 23, 26, 26, 29, 28, 28, 29, 34, 33, 30, 31, 37, 35, 34, 31, 37, 31, 36, 36, 38, 38, 44, 45, 47, 44, 43, 48, 49, 49, 52, 53, 54, 55, 54, 55, 54, 50, 54, 66, 65, 62, 66, 68, 65, 65, 71, 67, 73, 73, 67, 73, 73, 73, 78, 84, 80, 78, 78, 82, 78, 80, 84, 81, 78, 75, 73, 68, 65, 60, 67, 68, 68, 66, 68, 71, 83, 87, 80, 78, 80, 86, 88, 87, 93, 89, 89, 93, 97, 95, 91, 84, 87, 95, 93, 90, 95, 82, 77, 82, 87, 94, 94, 96, 92, 94, 92, 97, 97, 102, 99, 99, 97, 98, 100, 105, 104, 100, 105, 99, 102, 106, 106, 99, 104, 107, 104, 103, 107, 104, 106, 107, 109, 112, 108, 105, 106, 112, 106, 104, 108, 102, 98, 98, 94, 102, 101, 93, 95, 94, 93, 88, 90, 93, 88, 92, 91, 88, 90, 85, 88, 93, 89, 90, 91, 95, 90, 86, 88, 89, 83, 79, 79, 77, 79, 69, 69, 77, 70, 69, 67, 66, 67, 66, 64, 65, 66, 59, 57, 59, 59, 54, 52, 48, 44, 51, 52, 46, 43, 49, 49, 47, 49, 47, 41, 40, 39, 39, 40, 38, 35, 33, 37, 41, 32, 36, 31, 26, 26, 27, 24, 27, 24, 24, 25, 22, 21, 22, 17, 17, 3, 2, 2, 2, 1, 2, 4, 5, 6, 6, 2, 2, 5, 3, 9, 8, 9, 7, 12, 11, 16, 13, 14, 15, 20, 23, 20, 22, 25, 26, 27, 27, 27, 26, 34, 35, 33, 31, 35, 34, 36, 30, 35, 32, 35, 34, 32, 35, 40, 41, 47, 45, 46, 48, 47, 50, 51, 53, 52, 54, 56, 57, 54, 54, 57, 61, 61, 61, 66, 70, 68, 69, 68, 68, 69, 68, 67, 69, 71, 74, 76, 80, 82, 80, 82, 82, 83, 83, 81, 77, 74, 74, 72, 69, 71, 66, 67, 68, 62, 63, 64, 65, 74, 80, 74, 76, 81, 82, 84, 85, 87, 88, 89, 90, 94, 95, 89, 83, 86, 91, 94, 87, 88, 87, 89, 88, 95, 97, 97, 98, 93, 94, 93, 95, 99, 97, 96, 95, 102, 99, 100, 102, 99, 99, 99, 98, 106, 103, 103, 101, 105, 104, 102, 102, 104, 104, 105, 106, 108, 105, 106, 107, 106, 105, 103, 106, 105, 103, 99, 99, 99, 103, 98, 93, 97, 95, 93, 91, 90, 93, 91, 88, 90, 90, 91, 88, 92, 95, 90, 88, 90, 97, 93, 86, 83, 83, 79, 76, 78, 73, 78, 67, 70, 76, 72, 71, 68, 69, 69, 66, 67, 65, 64, 62, 57, 60, 58, 55, 56, 53, 52, 55, 53, 47, 44, 49, 48, 47, 48, 45, 40, 39, 42, 42, 41, 35, 35, 37, 37, 36, 30, 35, 31, 30, 27, 28, 22, 30, 24, 26, 24, 23, 21, 23, 19, 21, 3, 2, 2, 2, 1, 2, 4, 5, 8, 11, 5, 2, 6, 3, 6, 7, 7, 9, 12, 13, 10, 11, 12, 19, 13, 18, 23, 23, 24, 27, 27, 26, 29, 27, 27, 31, 34, 37, 32, 36, 34, 37, 32, 35, 33, 35, 35, 32, 37, 39, 41, 42, 43, 43, 44, 49, 51, 54, 51, 51, 53, 56, 53, 52, 53, 54, 57, 57, 62, 65, 69, 70, 70, 70, 70, 69, 69, 70, 70, 69, 71, 73, 75, 81, 80, 82, 81, 81, 79, 82, 81, 80, 80, 78, 74, 73, 65, 64, 68, 62, 64, 63, 65, 70, 75, 76, 78, 79, 80, 85, 84, 87, 90, 87, 84, 88, 89, 89, 83, 83, 88, 89, 92, 89, 90, 91, 92, 98, 94, 95, 92, 91, 91, 91, 93, 97, 92, 91, 89, 97, 95, 99, 101, 98, 98, 94, 96, 103, 97, 100, 101, 103, 98, 98, 99, 102, 104, 106, 108, 108, 105, 103, 104, 100, 100, 100, 104, 101, 102, 101, 98, 102, 103, 96, 95, 100, 97, 95, 95, 95, 93, 93, 93, 91, 92, 92, 90, 91, 94, 87, 85, 92, 90, 88, 85, 82, 81, 80, 81, 78, 74, 71, 67, 71, 73, 71, 73, 68, 68, 69, 66, 65, 64, 65, 64, 61, 60, 63, 60, 57, 57, 59, 56, 52, 48, 44, 45, 48, 49, 42, 43, 41, 40, 42, 44, 39, 37, 35, 36, 35, 34, 31, 32, 32, 32, 28, 25, 25, 30, 25, 28, 26, 29, 26, 24, 18, 23, 2, 2, 3, 2, 3, 5, 9, 12, 7, 7, 13, 10, 6, 7, 8, 5, 9, 13, 10, 13, 11, 11, 17, 13, 17, 21, 23, 23, 25, 26, 28, 30, 27, 30, 31, 33, 36, 34, 38, 39, 37, 34, 37, 34, 32, 34, 36, 37, 35, 39, 37, 42, 41, 41, 48, 48, 55, 50, 51, 52, 54, 53, 55, 55, 52, 55, 54, 61, 62, 65, 69, 71, 72, 68, 71, 73, 69, 70, 67, 67, 70, 71, 75, 75, 78, 81, 81, 76, 82, 79, 79, 78, 80, 79, 78, 74, 67, 65, 60, 61, 62, 63, 68, 72, 79, 77, 79, 81, 85, 81, 86, 88, 82, 83, 84, 84, 87, 82, 82, 91, 90, 90, 91, 90, 93, 93, 97, 93, 92, 92, 94, 90, 88, 91, 91, 92, 93, 93, 94, 94, 96, 98, 99, 93, 94, 94, 100, 97, 100, 102, 100, 97, 97, 98, 104, 104, 103, 102, 105, 106, 102, 103, 99, 98, 97, 100, 97, 100, 100, 100, 100, 98, 97, 98, 98, 97, 94, 96, 95, 92, 94, 95, 95, 93, 93, 94, 94, 93, 89, 88, 94, 88, 89, 86, 83, 78, 75, 82, 77, 76, 68, 70, 71, 72, 72, 73, 69, 68, 68, 68, 67, 65, 70, 65, 63, 61, 66, 60, 59, 62, 59, 56, 53, 50, 47, 46, 51, 52, 41, 43, 43, 42, 40, 40, 39, 38, 35, 35, 34, 35, 28, 31, 34, 34, 33, 25, 30, 31, 28, 28, 26, 28, 25, 22, 21, 25, 1, 1, 2, 2, 1, 4, 7, 9, 11, 8, 13, 10, 13, 9, 14, 14, 12, 15, 14, 18, 17, 11, 12, 14, 14, 19, 23, 20, 22, 25, 29, 31, 29, 31, 34, 33, 36, 36, 37, 41, 36, 37, 39, 37, 33, 36, 41, 37, 37, 41, 38, 40, 42, 43, 46, 46, 53, 52, 53, 55, 55, 56, 51, 52, 51, 52, 55, 60, 59, 61, 68, 72, 66, 66, 67, 70, 67, 66, 68, 68, 67, 70, 69, 74, 76, 77, 80, 76, 77, 76, 80, 80, 81, 79, 82, 83, 83, 75, 66, 63, 65, 61, 62, 65, 72, 73, 78, 80, 82, 80, 86, 85, 83, 79, 74, 81, 81, 79, 84, 90, 86, 86, 90, 88, 92, 90, 92, 92, 88, 88, 91, 86, 88, 91, 86, 88, 90, 93, 94, 93, 87, 92, 97, 97, 93, 96, 103, 100, 98, 100, 95, 97, 94, 95, 101, 100, 101, 103, 106, 105, 100, 100, 98, 98, 99, 100, 97, 100, 103, 106, 100, 92, 94, 97, 96, 96, 93, 96, 99, 98, 94, 95, 101, 95, 97, 100, 97, 95, 93, 92, 90, 88, 86, 83, 81, 78, 75, 77, 75, 76, 71, 74, 71, 72, 73, 73, 67, 67, 66, 64, 69, 70, 72, 66, 65, 66, 61, 57, 61, 62, 58, 57, 55, 51, 48, 49, 53, 50, 44, 47, 45, 42, 39, 39, 41, 36, 38, 38, 35, 34, 30, 36, 35, 32, 31, 29, 28, 28, 26, 26, 27, 25, 24, 23, 22, 24, 1, 1, 1, 1, 1, 3, 6, 6, 9, 9, 9, 13, 10, 11, 16, 15, 18, 21, 19, 18, 18, 14, 15, 19, 15, 16, 16, 16, 24, 27, 28, 33, 31, 28, 35, 35, 40, 37, 37, 40, 32, 43, 42, 37, 36, 35, 37, 35, 37, 42, 43, 44, 50, 45, 46, 48, 50, 52, 52, 57, 55, 54, 54, 54, 51, 56, 55, 61, 58, 58, 63, 67, 66, 65, 67, 71, 69, 65, 66, 68, 65, 74, 66, 70, 71, 73, 73, 74, 74, 74, 78, 81, 83, 83, 85, 82, 85, 82, 80, 68, 65, 62, 63, 66, 66, 68, 73, 78, 85, 77, 81, 81, 84, 74, 71, 74, 79, 77, 78, 85, 82, 84, 81, 83, 84, 87, 89, 92, 89, 87, 93, 88, 90, 86, 88, 90, 88, 89, 90, 93, 88, 90, 88, 92, 98, 101, 101, 99, 99, 102, 99, 100, 96, 97, 103, 97, 100, 103, 102, 105, 98, 92, 100, 106, 95, 99, 102, 102, 109, 106, 99, 93, 94, 98, 98, 96, 94, 98, 101, 94, 92, 99, 102, 94, 97, 99, 93, 98, 93, 94, 85, 87, 84, 81, 76, 75, 77, 72, 74, 74, 74, 77, 71, 70, 73, 74, 75, 67, 65, 68, 72, 76, 70, 67, 68, 69, 62, 59, 62, 60, 59, 56, 55, 50, 47, 50, 54, 48, 43, 48, 50, 39, 44, 45, 43, 36, 37, 36, 33, 34, 32, 36, 36, 36, 30, 36, 24, 28, 24, 25, 28, 23, 23, 21, 25, 25, 2, 2, 1, 2, 1, 4, 8, 6, 8, 8, 6, 9, 11, 12, 13, 18, 16, 19, 20, 14, 14, 17, 18, 16, 17, 16, 18, 22, 24, 26, 32, 31, 32, 37, 37, 39, 37, 38, 40, 41, 43, 46, 34, 34, 38, 38, 37, 37, 38, 40, 43, 45, 43, 47, 47, 55, 52, 54, 57, 54, 57, 58, 56, 52, 54, 55, 56, 54, 54, 60, 62, 65, 70, 69, 73, 70, 66, 71, 72, 72, 77, 76, 68, 74, 78, 69, 74, 77, 79, 78, 80, 84, 84, 80, 87, 86, 82, 80, 77, 69, 66, 65, 62, 68, 64, 68, 77, 81, 83, 77, 73, 80, 76, 73, 75, 76, 74, 77, 80, 83, 80, 80, 82, 82, 84, 85, 85, 88, 91, 93, 96, 95, 91, 92, 93, 94, 91, 90, 89, 88, 91, 88, 91, 100, 101, 98, 102, 95, 102, 99, 97, 98, 98, 97, 97, 97, 101, 100, 102, 103, 101, 105, 105, 103, 110, 110, 113, 110, 110, 104, 102, 100, 100, 101, 100, 104, 105, 103, 99, 98, 99, 100, 96, 96, 94, 90, 92, 90, 92, 88, 87, 86, 81, 80, 77, 78, 71, 75, 75, 82, 83, 81, 78, 72, 75, 69, 68, 65, 65, 67, 70, 63, 62, 65, 71, 62, 63, 63, 61, 61, 57, 59, 49, 47, 52, 48, 47, 45, 45, 46, 42, 43, 43, 38, 40, 38, 35, 35, 39, 39, 40, 37, 36, 32, 35, 29, 27, 37, 26, 26, 23, 22, 25, 26, 25, 1, 2, 2, 1, 4, 5, 7, 9, 13, 10, 8, 6, 12, 13, 13, 10, 12, 17, 19, 21, 20, 17, 14, 18, 17, 19, 22, 24, 25, 22, 26, 25, 27, 31, 33, 35, 40, 38, 39, 40, 39, 39, 46, 46, 40, 36, 41, 37, 37, 38, 43, 42, 46, 45, 46, 50, 51, 53, 54, 53, 60, 56, 57, 56, 55, 53, 56, 59, 52, 57, 56, 63, 62, 66, 69, 71, 75, 72, 74, 73, 71, 75, 77, 79, 74, 75, 79, 75, 77, 79, 80, 78, 81, 84, 80, 79, 84, 89, 86, 84, 81, 73, 70, 70, 67, 69, 66, 66, 75, 77, 78, 74, 74, 76, 74, 78, 79, 77, 76, 79, 75, 81, 81, 84, 84, 89, 86, 87, 90, 91, 90, 91, 95, 91, 90, 91, 94, 95, 94, 92, 93, 93, 90, 87, 96, 100, 103, 103, 100, 99, 97, 101, 99, 100, 96, 99, 93, 92, 93, 99, 103, 101, 108, 105, 107, 110, 109, 107, 109, 106, 105, 105, 100, 105, 103, 102, 106, 100, 102, 100, 103, 101, 98, 100, 96, 97, 97, 96, 90, 89, 90, 91, 89, 87, 86, 81, 82, 77, 79, 83, 83, 86, 83, 79, 81, 77, 80, 73, 71, 69, 68, 67, 70, 62, 63, 64, 62, 60, 63, 59, 60, 61, 59, 58, 56, 54, 53, 52, 51, 46, 47, 46, 41, 43, 42, 43, 43, 40, 39, 37, 40, 42, 39, 38, 37, 31, 29, 27, 32, 34, 30, 25, 24, 27, 28, 29, 27, 1, 1, 2, 2, 5, 5, 5, 13, 10, 13, 10, 8, 9, 11, 13, 13, 10, 13, 16, 20, 20, 20, 21, 18, 19, 18, 23, 25, 27, 26, 28, 26, 28, 28, 33, 34, 35, 40, 36, 39, 42, 40, 41, 44, 45, 48, 41, 44, 40, 42, 42, 49, 45, 48, 46, 48, 49, 56, 54, 56, 52, 60, 58, 60, 59, 63, 62, 57, 62, 58, 62, 60, 65, 68, 66, 70, 74, 75, 76, 76, 76, 75, 78, 79, 80, 79, 80, 80, 79, 82, 84, 84, 81, 83, 87, 82, 81, 84, 90, 88, 88, 85, 81, 77, 77, 68, 72, 75, 72, 74, 78, 74, 73, 73, 74, 76, 80, 80, 77, 77, 79, 81, 84, 84, 91, 91, 94, 95, 94, 93, 93, 93, 90, 93, 91, 93, 90, 94, 93, 94, 93, 95, 93, 93, 92, 96, 97, 97, 105, 103, 106, 99, 103, 100, 101, 97, 99, 96, 97, 96, 100, 106, 101, 107, 103, 108, 112, 109, 105, 103, 103, 106, 108, 104, 107, 106, 100, 103, 97, 98, 102, 101, 102, 98, 101, 99, 100, 99, 96, 94, 90, 92, 87, 85, 87, 84, 81, 82, 82, 85, 85, 87, 89, 85, 79, 83, 80, 81, 79, 75, 73, 70, 69, 72, 65, 65, 66, 63, 61, 61, 59, 61, 58, 58, 59, 58, 54, 53, 53, 52, 49, 48, 44, 45, 50, 47, 45, 42, 41, 41, 36, 38, 41, 40, 38, 36, 31, 29, 29, 33, 29, 31, 26, 26, 28, 28, 28, 26, 2, 1, 2, 2, 1, 4, 3, 5, 9, 13, 10, 13, 10, 11, 14, 13, 9, 14, 16, 18, 18, 24, 24, 22, 21, 24, 22, 31, 30, 26, 30, 29, 30, 28, 36, 36, 39, 36, 36, 36, 41, 41, 42, 43, 47, 50, 46, 46, 46, 47, 45, 52, 49, 49, 49, 52, 49, 54, 57, 60, 55, 59, 60, 58, 62, 69, 68, 62, 67, 64, 65, 65, 65, 67, 68, 72, 77, 76, 81, 79, 80, 80, 80, 80, 79, 82, 85, 83, 83, 84, 84, 87, 82, 86, 85, 84, 86, 86, 91, 90, 90, 84, 86, 83, 80, 78, 80, 82, 82, 75, 82, 77, 73, 73, 78, 82, 85, 88, 83, 84, 82, 88, 91, 92, 94, 97, 97, 102, 101, 96, 96, 94, 95, 92, 92, 96, 93, 97, 94, 95, 96, 96, 99, 100, 96, 98, 96, 96, 109, 108, 108, 102, 106, 105, 103, 106, 101, 104, 103, 107, 106, 110, 105, 103, 105, 110, 108, 107, 102, 100, 104, 107, 105, 111, 109, 105, 103, 100, 97, 96, 98, 98, 102, 100, 104, 100, 99, 101, 100, 98, 94, 97, 90, 90, 88, 87, 91, 87, 89, 90, 92, 90, 89, 86, 82, 85, 82, 82, 86, 80, 76, 72, 70, 70, 69, 65, 66, 67, 64, 61, 61, 61, 59, 62, 62, 57, 55, 55, 52, 51, 51, 50, 44, 48, 51, 49, 47, 42, 41, 41, 36, 39, 38, 41, 39, 33, 33, 34, 33, 32, 28, 29, 28, 26, 30, 30, 26, 27, 3, 1, 2, 2, 2, 5, 3, 7, 9, 8, 6, 13, 10, 15, 14, 9, 12, 16, 19, 19, 21, 23, 27, 22, 22, 23, 31, 29, 32, 27, 30, 32, 30, 35, 34, 40, 33, 39, 35, 44, 41, 40, 42, 48, 46, 48, 48, 51, 48, 45, 51, 53, 50, 50, 54, 51, 49, 57, 61, 56, 59, 64, 60, 70, 73, 70, 74, 76, 73, 70, 71, 70, 73, 71, 68, 76, 76, 81, 78, 83, 85, 80, 80, 82, 87, 85, 83, 82, 88, 86, 86, 85, 88, 86, 85, 86, 91, 88, 93, 96, 91, 95, 89, 82, 84, 87, 86, 82, 76, 82, 85, 84, 82, 85, 85, 89, 91, 88, 96, 97, 99, 103, 108, 103, 105, 105, 104, 104, 103, 100, 93, 98, 96, 98, 104, 102, 102, 103, 102, 103, 102, 105, 106, 101, 98, 102, 103, 107, 108, 108, 105, 107, 107, 104, 111, 105, 111, 108, 110, 112, 109, 106, 100, 103, 110, 106, 100, 97, 103, 107, 105, 104, 110, 107, 104, 108, 102, 103, 100, 102, 104, 105, 99, 99, 95, 97, 99, 100, 100, 98, 94, 91, 90, 91, 91, 96, 93, 92, 92, 94, 90, 87, 83, 87, 86, 84, 84, 87, 81, 77, 73, 74, 70, 75, 71, 68, 69, 64, 62, 59, 59, 61, 64, 63, 60, 59, 55, 54, 56, 51, 51, 46, 49, 48, 50, 47, 43, 43, 40, 38, 41, 40, 39, 41, 34, 36, 34, 34, 36, 31, 32, 31, 27, 35, 31, 28, 33, 3, 1, 2, 3, 2, 7, 4, 13, 10, 13, 10, 11, 13, 14, 11, 11, 13, 10, 9, 16, 21, 20, 25, 23, 23, 22, 25, 27, 26, 24, 30, 26, 28, 32, 35, 34, 33, 40, 35, 40, 37, 39, 45, 48, 47, 42, 46, 48, 49, 52, 49, 46, 50, 52, 52, 52, 55, 53, 53, 63, 66, 61, 62, 65, 63, 67, 70, 68, 80, 81, 82, 79, 77, 80, 83, 80, 74, 77, 76, 78, 78, 82, 87, 83, 81, 87, 88, 85, 84, 80, 91, 86, 85, 91, 89, 91, 86, 87, 95, 91, 97, 93, 89, 91, 89, 92, 91, 87, 85, 85, 83, 78, 81, 84, 85, 87, 90, 95, 98, 99, 102, 106, 106, 107, 112, 108, 107, 107, 109, 110, 114, 108, 105, 109, 107, 108, 108, 107, 99, 105, 106, 105, 109, 105, 108, 108, 100, 108, 110, 103, 110, 108, 107, 107, 106, 108, 111, 113, 114, 112, 107, 104, 102, 102, 100, 105, 105, 105, 99, 99, 106, 107, 105, 105, 103, 99, 108, 107, 105, 108, 105, 107, 102, 106, 106, 93, 93, 97, 94, 91, 99, 94, 89, 95, 94, 102, 100, 99, 98, 98, 94, 94, 91, 94, 84, 89, 85, 83, 84, 81, 79, 78, 77, 80, 78, 81, 78, 70, 67, 64, 64, 58, 61, 61, 63, 61, 62, 60, 55, 58, 56, 49, 52, 50, 49, 50, 52, 48, 43, 44, 40, 44, 41, 46, 44, 45, 39, 37, 35, 37, 38, 38, 39, 35, 33, 35, 30, 34, 37, 2, 1, 1, 2, 3, 6, 3, 13, 10, 8, 11, 9, 8, 13, 10, 12, 13, 13, 10, 18, 21, 20, 25, 25, 24, 24, 25, 26, 23, 25, 23, 23, 30, 30, 34, 36, 36, 39, 38, 40, 38, 39, 49, 47, 47, 46, 49, 47, 50, 53, 54, 50, 50, 49, 52, 53, 50, 47, 57, 66, 66, 62, 63, 65, 71, 67, 74, 72, 80, 81, 80, 81, 79, 82, 81, 83, 82, 86, 86, 90, 85, 80, 83, 89, 87, 87, 87, 88, 89, 89, 94, 89, 100, 101, 97, 96, 95, 104, 101, 94, 100, 92, 95, 95, 95, 96, 95, 92, 83, 86, 94, 96, 98, 101, 102, 100, 108, 107, 111, 116, 110, 116, 121, 114, 115, 117, 114, 113, 111, 112, 113, 108, 115, 115, 115, 120, 115, 118, 107, 114, 116, 118, 108, 108, 113, 111, 107, 110, 114, 112, 116, 107, 107, 114, 112, 115, 116, 123, 111, 112, 108, 111, 113, 109, 105, 107, 101, 104, 102, 105, 105, 105, 102, 103, 104, 100, 109, 107, 107, 107, 104, 106, 111, 107, 92, 101, 103, 103, 99, 99, 99, 89, 87, 93, 95, 106, 105, 100, 98, 94, 90, 98, 89, 96, 87, 87, 81, 81, 82, 81, 80, 78, 80, 81, 82, 79, 78, 67, 62, 67, 65, 63, 67, 64, 66, 61, 61, 62, 59, 57, 53, 51, 56, 55, 50, 51, 52, 51, 47, 47, 44, 49, 44, 50, 50, 48, 41, 36, 40, 41, 35, 41, 38, 34, 37, 34, 33, 36, 36, 3, 3, 2, 3, 2, 7, 5, 12, 13, 10, 11, 8, 13, 10, 8, 14, 15, 16, 23, 20, 20, 23, 24, 24, 24, 27, 31, 25, 27, 25, 24, 32, 32, 32, 37, 42, 45, 39, 41, 42, 42, 49, 49, 52, 50, 49, 50, 52, 57, 57, 54, 57, 54, 55, 54, 53, 53, 61, 68, 69, 67, 64, 65, 70, 70, 71, 78, 78, 84, 80, 84, 82, 85, 85, 89, 86, 86, 89, 92, 92, 87, 91, 93, 95, 90, 91, 91, 92, 92, 97, 97, 105, 107, 98, 103, 106, 106, 107, 104, 101, 105, 105, 101, 101, 104, 106, 108, 95, 99, 97, 103, 99, 110, 116, 112, 120, 120, 124, 122, 117, 115, 120, 121, 121, 122, 122, 128, 127, 123, 122, 119, 121, 122, 125, 120, 121, 121, 119, 119, 122, 121, 117, 114, 120, 114, 111, 116, 117, 122, 117, 114, 115, 118, 120, 119, 122, 124, 123, 119, 121, 120, 116, 117, 111, 108, 107, 105, 106, 105, 106, 104, 106, 107, 111, 107, 109, 110, 107, 110, 104, 107, 103, 99, 85, 105, 104, 102, 103, 101, 94, 87, 87, 99, 104, 108, 104, 98, 93, 92, 94, 96, 92, 90, 90, 87, 79, 85, 82, 86, 82, 79, 84, 79, 86, 83, 76, 65, 70, 70, 68, 68, 65, 66, 66, 63, 64, 63, 63, 61, 58, 55, 58, 53, 53, 56, 58, 55, 52, 51, 47, 47, 49, 51, 49, 49, 43, 39, 37, 41, 36, 38, 39, 38, 39, 34, 35, 39, 38, 8, 5, 4, 2, 3, 7, 5, 12, 11, 13, 10, 11, 13, 13, 15, 18, 21, 22, 19, 22, 21, 24, 26, 25, 26, 32, 29, 29, 25, 31, 32, 31, 33, 36, 44, 46, 42, 42, 44, 43, 46, 45, 49, 50, 48, 52, 53, 58, 57, 59, 63, 62, 59, 57, 59, 61, 68, 73, 68, 67, 68, 68, 70, 74, 72, 78, 81, 83, 81, 83, 84, 83, 85, 90, 91, 90, 90, 96, 93, 91, 94, 92, 96, 96, 93, 97, 95, 95, 96, 103, 105, 107, 104, 106, 106, 103, 106, 106, 109, 113, 113, 109, 112, 114, 113, 118, 118, 114, 106, 114, 118, 122, 125, 127, 128, 128, 129, 125, 122, 121, 121, 122, 123, 126, 128, 128, 133, 134, 130, 125, 125, 126, 126, 124, 125, 125, 123, 126, 128, 126, 123, 124, 125, 120, 113, 118, 126, 123, 127, 123, 123, 120, 120, 123, 124, 126, 125, 121, 125, 124, 118, 117, 117, 111, 110, 110, 110, 109, 110, 109, 113, 113, 119, 109, 114, 113, 109, 111, 107, 108, 105, 105, 105, 109, 106, 107, 107, 101, 93, 95, 100, 112, 108, 108, 106, 99, 95, 97, 95, 96, 90, 90, 84, 85, 84, 86, 81, 86, 83, 84, 83, 79, 81, 81, 77, 66, 73, 70, 70, 71, 69, 63, 64, 61, 63, 64, 65, 61, 60, 61, 59, 54, 58, 61, 65, 58, 50, 48, 47, 45, 49, 50, 50, 47, 44, 42, 38, 41, 41, 40, 41, 39, 39, 37, 37, 36, 36, 9, 2, 4, 4, 4, 6, 6, 12, 12, 11, 13, 10, 9, 15, 14, 17, 22, 21, 20, 22, 19, 23, 27, 29, 28, 34, 31, 31, 26, 33, 31, 33, 37, 37, 44, 45, 45, 44, 43, 43, 45, 46, 49, 49, 50, 53, 51, 55, 56, 67, 66, 66, 62, 66, 65, 65, 72, 74, 74, 73, 73, 71, 71, 73, 77, 79, 83, 81, 83, 82, 84, 82, 88, 92, 94, 95, 95, 97, 97, 96, 98, 96, 98, 101, 96, 98, 98, 102, 98, 108, 109, 111, 106, 107, 106, 103, 107, 106, 113, 116, 117, 117, 121, 120, 120, 124, 130, 127, 129, 130, 131, 131, 131, 133, 132, 134, 134, 131, 130, 129, 126, 125, 123, 132, 129, 129, 135, 133, 133, 130, 128, 128, 126, 127, 126, 130, 126, 127, 128, 131, 132, 130, 124, 123, 121, 124, 129, 127, 133, 129, 124, 125, 124, 126, 126, 127, 123, 124, 128, 126, 123, 122, 123, 121, 120, 119, 117, 115, 118, 115, 114, 119, 121, 114, 117, 111, 113, 113, 110, 106, 112, 114, 113, 111, 112, 114, 108, 100, 92, 107, 113, 113, 110, 106, 108, 99, 95, 98, 97, 100, 93, 92, 85, 84, 85, 85, 81, 89, 85, 87, 86, 80, 79, 76, 78, 71, 78, 73, 74, 70, 69, 65, 68, 65, 68, 62, 62, 65, 64, 57, 61, 59, 63, 65, 69, 60, 54, 52, 49, 45, 49, 48, 51, 47, 48, 43, 40, 43, 40, 38, 41, 41, 42, 39, 37, 36, 35, 6, 3, 4, 7, 6, 8, 11, 11, 11, 13, 10, 9, 17, 16, 16, 20, 21, 20, 21, 21, 23, 28, 32, 32, 35, 31, 34, 33, 36, 34, 34, 36, 40, 46, 47, 45, 46, 45, 45, 46, 50, 50, 48, 46, 50, 49, 57, 61, 66, 66, 67, 64, 68, 69, 69, 75, 76, 81, 78, 76, 72, 73, 72, 76, 81, 83, 83, 84, 82, 85, 84, 90, 88, 99, 97, 96, 94, 97, 97, 98, 99, 98, 104, 104, 101, 97, 101, 106, 115, 109, 113, 110, 108, 104, 103, 108, 108, 117, 115, 117, 118, 121, 121, 125, 126, 131, 132, 134, 129, 128, 132, 135, 135, 136, 135, 137, 136, 137, 136, 131, 134, 133, 138, 131, 136, 135, 132, 137, 131, 128, 129, 131, 133, 131, 137, 133, 130, 130, 135, 134, 134, 130, 126, 127, 130, 133, 132, 133, 132, 126, 133, 132, 132, 125, 127, 125, 127, 125, 123, 123, 124, 123, 126, 129, 130, 128, 123, 121, 122, 113, 120, 121, 122, 118, 111, 117, 117, 118, 111, 113, 117, 110, 113, 113, 114, 108, 100, 103, 118, 115, 107, 111, 107, 104, 97, 99, 100, 103, 98, 96, 95, 92, 87, 86, 84, 85, 91, 90, 87, 87, 82, 82, 80, 79, 73, 82, 74, 76, 73, 69, 72, 76, 72, 67, 64, 67, 69, 65, 60, 62, 64, 63, 63, 63, 57, 59, 55, 51, 47, 51, 48, 52, 51, 53, 48, 43, 44, 42, 38, 43, 42, 39, 38, 38, 37, 35, 6, 3, 3, 3, 11, 7, 11, 11, 9, 13, 10, 11, 15, 17, 17, 18, 19, 19, 19, 21, 23, 22, 27, 30, 31, 35, 28, 33, 32, 31, 34, 35, 37, 40, 45, 46, 47, 48, 50, 52, 51, 56, 53, 52, 56, 57, 53, 55, 57, 63, 63, 64, 64, 68, 66, 72, 77, 82, 81, 77, 77, 75, 74, 77, 75, 87, 85, 85, 84, 83, 85, 88, 90, 88, 103, 100, 98, 91, 97, 98, 99, 102, 98, 102, 105, 103, 100, 103, 111, 114, 108, 112, 115, 115, 108, 104, 104, 115, 120, 116, 116, 115, 129, 126, 125, 126, 133, 131, 132, 133, 131, 134, 137, 134, 136, 135, 135, 137, 138, 136, 134, 143, 138, 141, 140, 135, 130, 132, 138, 133, 133, 132, 139, 137, 134, 138, 136, 133, 132, 133, 133, 132, 131, 128, 137, 132, 140, 138, 137, 138, 134, 140, 136, 136, 128, 132, 128, 125, 124, 129, 126, 127, 126, 128, 128, 132, 134, 130, 126, 124, 121, 124, 126, 121, 121, 115, 117, 121, 119, 118, 115, 121, 109, 120, 114, 114, 111, 104, 113, 119, 114, 107, 112, 104, 98, 102, 106, 99, 104, 96, 98, 91, 91, 87, 86, 87, 94, 87, 92, 85, 85, 85, 85, 82, 77, 72, 76, 78, 77, 81, 75, 73, 73, 70, 68, 67, 66, 69, 65, 65, 66, 72, 68, 64, 62, 60, 59, 53, 50, 50, 55, 58, 56, 52, 50, 48, 47, 46, 49, 43, 47, 44, 40, 43, 41, 37, 37, 9, 6, 3, 3, 9, 6, 11, 13, 13, 10, 11, 12, 17, 17, 18, 20, 19, 17, 20, 22, 22, 21, 23, 25, 29, 32, 31, 35, 35, 33, 36, 40, 42, 40, 46, 49, 48, 44, 45, 50, 50, 57, 53, 53, 56, 56, 56, 56, 57, 67, 63, 58, 60, 61, 62, 72, 71, 81, 81, 76, 80, 79, 76, 73, 78, 88, 91, 87, 84, 84, 85, 93, 90, 93, 104, 101, 98, 94, 97, 98, 99, 103, 102, 105, 103, 105, 106, 110, 113, 112, 109, 114, 111, 117, 114, 117, 116, 122, 124, 118, 119, 114, 123, 124, 124, 120, 130, 132, 132, 132, 128, 135, 136, 131, 136, 137, 134, 137, 137, 135, 135, 147, 139, 140, 140, 133, 139, 140, 140, 135, 135, 130, 140, 137, 136, 132, 129, 129, 132, 132, 134, 137, 137, 129, 129, 130, 136, 138, 137, 139, 140, 145, 136, 136, 135, 138, 130, 133, 135, 132, 130, 127, 124, 127, 136, 130, 128, 130, 132, 129, 128, 127, 127, 122, 125, 120, 119, 123, 121, 123, 117, 117, 117, 125, 118, 115, 114, 110, 121, 123, 113, 112, 107, 107, 103, 104, 99, 96, 102, 100, 99, 92, 93, 93, 89, 88, 95, 86, 89, 85, 86, 86, 90, 85, 81, 82, 78, 82, 82, 81, 80, 73, 75, 72, 74, 72, 67, 72, 66, 65, 64, 69, 68, 63, 61, 60, 58, 54, 53, 54, 54, 60, 54, 55, 50, 48, 50, 48, 52, 46, 43, 43, 41, 44, 41, 42, 42, 9, 5, 5, 6, 7, 8, 12, 13, 11, 11, 13, 17, 17, 21, 21, 20, 18, 21, 22, 19, 20, 23, 22, 30, 35, 34, 36, 33, 28, 34, 39, 42, 39, 46, 45, 43, 41, 48, 51, 52, 60, 55, 55, 57, 53, 55, 53, 56, 63, 61, 58, 63, 65, 63, 71, 68, 79, 81, 78, 81, 80, 78, 74, 86, 88, 87, 82, 86, 85, 85, 93, 92, 94, 102, 98, 94, 97, 98, 97, 100, 104, 103, 103, 104, 105, 105, 106, 114, 112, 109, 114, 115, 115, 113, 121, 125, 126, 125, 122, 122, 122, 127, 122, 123, 117, 128, 130, 130, 128, 130, 131, 133, 133, 137, 138, 136, 135, 135, 139, 139, 139, 140, 139, 138, 143, 140, 144, 142, 136, 139, 142, 145, 141, 139, 134, 129, 128, 137, 137, 134, 135, 137, 132, 131, 133, 132, 138, 135, 136, 135, 143, 138, 140, 139, 138, 132, 139, 139, 137, 138, 132, 128, 131, 130, 130, 132, 134, 133, 134, 128, 129, 128, 127, 125, 124, 121, 127, 119, 124, 122, 115, 121, 121, 118, 116, 113, 117, 118, 117, 107, 111, 110, 108, 102, 100, 96, 100, 104, 102, 96, 96, 95, 92, 86, 87, 93, 87, 87, 87, 89, 85, 88, 87, 83, 86, 83, 83, 84, 79, 81, 76, 76, 74, 70, 73, 69, 71, 65, 68, 66, 69, 69, 63, 64, 63, 58, 57, 56, 57, 53, 59, 55, 55, 50, 46, 50, 49, 51, 47, 45, 46, 44, 42, 46, 44, 41, 5, 5, 5, 8, 8, 11, 12, 12, 12, 12, 14, 18, 16, 22, 23, 22, 22, 20, 21, 17, 22, 25, 23, 29, 34, 34, 37, 34, 29, 30, 39, 41, 38, 44, 44, 44, 43, 48, 49, 51, 58, 50, 52, 52, 54, 55, 54, 60, 62, 58, 60, 65, 71, 69, 71, 75, 79, 79, 79, 77, 79, 81, 83, 85, 90, 84, 86, 86, 87, 87, 90, 95, 95, 99, 98, 98, 97, 99, 98, 101, 103, 104, 105, 109, 110, 106, 111, 116, 114, 117, 118, 116, 113, 115, 120, 122, 124, 123, 124, 121, 128, 124, 124, 124, 118, 128, 129, 128, 124, 131, 129, 132, 133, 135, 139, 136, 135, 134, 142, 143, 136, 138, 138, 137, 143, 139, 141, 141, 140, 142, 147, 145, 143, 138, 137, 130, 132, 133, 138, 137, 133, 137, 133, 133, 135, 134, 136, 132, 136, 133, 135, 136, 136, 140, 138, 139, 140, 140, 137, 135, 131, 129, 133, 133, 133, 135, 134, 131, 132, 130, 134, 133, 132, 121, 125, 123, 128, 120, 126, 123, 117, 121, 119, 115, 113, 114, 119, 120, 114, 106, 108, 113, 106, 104, 99, 99, 100, 104, 99, 95, 96, 96, 94, 85, 89, 91, 89, 93, 91, 91, 87, 90, 86, 87, 86, 85, 86, 83, 82, 80, 79, 78, 77, 72, 76, 75, 72, 69, 68, 68, 70, 69, 64, 66, 62, 60, 62, 58, 57, 55, 60, 59, 54, 53, 53, 46, 48, 50, 50, 46, 45, 45, 43, 44, 47, 40, 6, 6, 3, 9, 9, 11, 14, 15, 13, 13, 13, 18, 16, 22, 23, 23, 20, 19, 17, 19, 23, 23, 23, 31, 34, 35, 38, 37, 39, 34, 37, 34, 43, 44, 47, 42, 46, 48, 49, 50, 59, 51, 54, 54, 58, 57, 57, 58, 62, 58, 63, 68, 71, 72, 74, 78, 79, 79, 83, 79, 80, 80, 81, 86, 89, 85, 86, 83, 84, 88, 90, 95, 96, 101, 99, 101, 98, 95, 97, 102, 101, 106, 109, 109, 107, 109, 111, 112, 114, 120, 119, 116, 116, 113, 121, 122, 123, 122, 122, 121, 127, 121, 125, 124, 124, 129, 128, 129, 126, 128, 128, 133, 131, 134, 136, 137, 134, 133, 137, 137, 138, 137, 142, 135, 141, 141, 139, 137, 140, 142, 141, 145, 144, 138, 140, 136, 137, 135, 142, 140, 137, 137, 135, 135, 132, 130, 135, 132, 134, 134, 136, 135, 138, 145, 134, 139, 138, 140, 132, 130, 125, 129, 134, 135, 131, 137, 133, 132, 132, 134, 133, 130, 130, 125, 121, 125, 127, 124, 126, 121, 118, 121, 115, 112, 112, 120, 119, 117, 112, 110, 108, 108, 103, 107, 102, 104, 105, 100, 99, 97, 95, 95, 96, 89, 92, 94, 89, 97, 92, 92, 90, 91, 88, 92, 86, 88, 90, 82, 84, 77, 84, 80, 78, 79, 78, 79, 75, 74, 69, 72, 72, 67, 68, 65, 63, 62, 66, 58, 55, 57, 62, 60, 57, 57, 59, 47, 52, 50, 52, 46, 45, 45, 45, 42, 46, 40, 13, 10, 8, 4, 9, 9, 11, 14, 17, 14, 15, 14, 18, 18, 23, 23, 24, 18, 21, 18, 23, 22, 22, 24, 33, 37, 32, 38, 39, 40, 38, 36, 34, 42, 43, 45, 41, 43, 48, 50, 52, 60, 58, 59, 61, 56, 61, 62, 57, 63, 60, 63, 69, 72, 73, 78, 74, 76, 80, 81, 75, 80, 84, 82, 92, 84, 80, 84, 84, 84, 91, 93, 95, 94, 102, 101, 101, 96, 98, 101, 111, 107, 103, 105, 111, 106, 106, 103, 114, 113, 121, 118, 117, 115, 109, 118, 123, 125, 121, 122, 121, 126, 121, 124, 126, 130, 132, 128, 131, 126, 128, 123, 131, 133, 134, 139, 139, 128, 132, 136, 130, 141, 139, 141, 134, 143, 142, 142, 139, 142, 143, 140, 141, 141, 141, 141, 138, 136, 136, 139, 137, 137, 135, 137, 134, 132, 128, 137, 137, 131, 134, 138, 135, 139, 146, 136, 136, 134, 136, 132, 130, 127, 132, 133, 131, 132, 133, 129, 130, 131, 133, 138, 133, 132, 131, 122, 127, 130, 126, 127, 124, 121, 120, 113, 116, 117, 121, 117, 115, 113, 111, 106, 106, 106, 103, 108, 105, 106, 102, 102, 100, 96, 101, 98, 96, 94, 98, 94, 97, 95, 92, 89, 90, 93, 92, 86, 85, 88, 84, 88, 79, 84, 82, 78, 80, 78, 79, 75, 74, 71, 70, 77, 71, 70, 64, 63, 64, 66, 60, 59, 58, 63, 62, 58, 60, 57, 52, 54, 51, 51, 51, 47, 45, 45, 46, 45, 40, 12, 8, 5, 9, 13, 10, 14, 14, 16, 13, 14, 14, 17, 19, 21, 21, 22, 16, 22, 20, 21, 22, 26, 23, 28, 39, 34, 38, 38, 38, 38, 41, 44, 37, 42, 43, 47, 39, 48, 47, 51, 51, 56, 55, 63, 62, 65, 62, 60, 66, 62, 63, 67, 72, 74, 74, 76, 72, 80, 81, 81, 83, 79, 86, 84, 85, 80, 81, 83, 83, 87, 91, 91, 95, 101, 102, 99, 96, 101, 104, 105, 103, 105, 105, 108, 103, 106, 105, 114, 110, 121, 118, 111, 114, 114, 120, 123, 126, 122, 128, 124, 126, 124, 121, 126, 131, 130, 128, 134, 129, 124, 131, 135, 137, 131, 133, 136, 134, 138, 136, 134, 138, 136, 135, 135, 143, 141, 144, 143, 144, 142, 143, 140, 140, 144, 140, 136, 138, 132, 138, 137, 133, 139, 135, 134, 137, 139, 140, 139, 137, 138, 140, 142, 140, 143, 141, 137, 137, 135, 139, 132, 128, 132, 135, 127, 130, 131, 129, 131, 126, 127, 132, 131, 130, 130, 129, 132, 133, 129, 125, 124, 125, 117, 116, 120, 122, 121, 116, 112, 117, 114, 106, 108, 111, 106, 115, 106, 104, 108, 102, 102, 96, 102, 98, 99, 93, 101, 100, 102, 97, 91, 91, 96, 99, 94, 88, 86, 85, 85, 85, 83, 81, 82, 80, 76, 75, 80, 79, 69, 70, 68, 74, 75, 75, 70, 66, 66, 65, 61, 60, 60, 65, 62, 56, 58, 57, 58, 46, 54, 50, 50, 45, 50, 44, 47, 47, 44, 12, 8, 13, 10, 13, 10, 14, 16, 15, 16, 15, 14, 11, 15, 19, 20, 19, 21, 19, 24, 23, 20, 23, 25, 26, 30, 39, 39, 37, 36, 40, 39, 43, 48, 40, 46, 42, 48, 44, 46, 46, 52, 46, 54, 54, 60, 66, 61, 61, 59, 66, 62, 62, 65, 69, 74, 73, 76, 77, 81, 79, 76, 81, 82, 84, 82, 86, 81, 81, 86, 85, 89, 93, 94, 100, 102, 100, 98, 98, 104, 108, 109, 105, 105, 104, 103, 104, 108, 110, 110, 113, 121, 115, 111, 115, 118, 120, 124, 123, 123, 131, 127, 127, 127, 123, 127, 130, 131, 130, 130, 130, 124, 132, 131, 135, 136, 136, 133, 134, 134, 134, 139, 138, 134, 134, 137, 137, 140, 142, 145, 145, 141, 146, 143, 138, 145, 144, 138, 136, 136, 138, 139, 137, 139, 140, 137, 137, 144, 140, 138, 138, 137, 139, 140, 140, 141, 137, 137, 137, 136, 140, 134, 132, 135, 137, 133, 128, 136, 135, 137, 130, 132, 128, 133, 131, 128, 131, 131, 131, 130, 127, 128, 125, 117, 123, 123, 126, 124, 119, 112, 113, 111, 108, 118, 114, 112, 108, 109, 108, 113, 104, 103, 98, 103, 100, 101, 94, 100, 97, 105, 99, 92, 92, 98, 96, 94, 90, 93, 90, 86, 82, 85, 82, 82, 79, 77, 77, 79, 81, 72, 74, 73, 74, 74, 72, 72, 69, 66, 66, 60, 58, 64, 63, 62, 59, 54, 53, 58, 50, 57, 48, 48, 43, 50, 42, 46, 49, 47, 12, 7, 13, 11, 15, 17, 16, 15, 16, 16, 12, 17, 19, 20, 18, 21, 22, 24, 23, 21, 28, 27, 33, 33, 37, 38, 34, 37, 41, 41, 44, 43, 42, 45, 46, 47, 47, 46, 48, 52, 48, 54, 54, 53, 59, 59, 61, 62, 64, 61, 62, 63, 64, 73, 75, 73, 79, 80, 79, 79, 80, 77, 78, 87, 83, 86, 82, 84, 81, 85, 89, 94, 100, 100, 95, 97, 99, 101, 107, 109, 100, 100, 102, 102, 107, 108, 111, 110, 117, 119, 116, 117, 118, 118, 116, 118, 122, 123, 127, 129, 127, 122, 125, 127, 132, 132, 135, 130, 130, 129, 131, 131, 133, 134, 134, 131, 135, 134, 136, 139, 137, 138, 138, 137, 133, 136, 141, 142, 145, 145, 140, 147, 142, 144, 143, 138, 135, 137, 143, 140, 139, 137, 142, 140, 139, 146, 143, 141, 138, 140, 140, 142, 145, 147, 140, 139, 135, 137, 137, 139, 135, 138, 140, 138, 136, 138, 139, 137, 130, 131, 130, 132, 131, 131, 130, 129, 132, 130, 127, 129, 124, 122, 125, 129, 131, 123, 118, 111, 112, 118, 112, 120, 114, 117, 111, 112, 110, 113, 112, 101, 106, 108, 104, 106, 98, 99, 100, 102, 100, 95, 95, 98, 96, 94, 95, 92, 92, 86, 86, 85, 85, 81, 79, 76, 83, 81, 78, 73, 71, 76, 76, 71, 70, 74, 67, 64, 64, 62, 59, 64, 63, 64, 59, 56, 53, 52, 55, 54, 50, 48, 45, 50, 44, 47, 48, 47, 11, 8, 12, 9, 15, 20, 18, 19, 15, 16, 19, 19, 21, 22, 19, 21, 23, 24, 24, 22, 30, 32, 34, 34, 37, 39, 35, 39, 41, 41, 46, 44, 48, 44, 47, 49, 46, 49, 49, 53, 49, 51, 54, 58, 57, 61, 62, 65, 62, 62, 63, 63, 63, 70, 74, 75, 73, 75, 79, 81, 76, 81, 83, 86, 82, 86, 84, 82, 82, 81, 86, 92, 96, 95, 93, 95, 99, 102, 106, 105, 96, 103, 103, 100, 104, 109, 111, 110, 117, 115, 118, 118, 122, 119, 115, 118, 123, 120, 126, 126, 127, 120, 124, 124, 132, 130, 136, 129, 132, 131, 126, 130, 136, 132, 133, 129, 136, 137, 139, 138, 135, 139, 141, 137, 135, 139, 144, 139, 139, 145, 140, 143, 144, 143, 141, 139, 137, 136, 148, 144, 141, 137, 140, 138, 142, 147, 144, 140, 138, 140, 137, 141, 142, 147, 146, 140, 141, 141, 139, 138, 137, 137, 140, 138, 139, 139, 138, 139, 138, 135, 135, 133, 132, 131, 132, 131, 130, 128, 126, 125, 124, 123, 125, 128, 131, 121, 122, 115, 115, 117, 114, 120, 115, 119, 114, 116, 113, 114, 118, 103, 109, 108, 105, 105, 103, 102, 100, 104, 101, 96, 100, 99, 95, 94, 95, 93, 93, 87, 87, 85, 84, 81, 78, 75, 81, 85, 76, 75, 72, 75, 76, 68, 71, 77, 71, 65, 63, 61, 59, 62, 68, 63, 62, 59, 56, 54, 56, 53, 54, 52, 49, 51, 48, 47, 46, 43, 11, 12, 11, 7, 16, 19, 17, 22, 19, 19, 21, 19, 23, 21, 21, 21, 23, 23, 26, 19, 27, 29, 30, 31, 32, 37, 35, 37, 37, 43, 45, 43, 51, 46, 44, 47, 46, 47, 48, 51, 49, 57, 58, 60, 56, 61, 65, 64, 62, 68, 67, 65, 69, 70, 72, 78, 71, 74, 81, 83, 76, 83, 83, 80, 83, 84, 86, 82, 86, 87, 83, 87, 94, 91, 91, 93, 99, 100, 104, 105, 98, 108, 106, 103, 102, 105, 108, 109, 116, 113, 115, 116, 122, 118, 119, 117, 120, 120, 122, 125, 122, 121, 121, 126, 131, 131, 135, 126, 136, 135, 130, 131, 136, 132, 130, 127, 129, 134, 137, 141, 134, 135, 137, 137, 137, 140, 140, 141, 142, 145, 143, 141, 141, 145, 138, 140, 139, 138, 148, 145, 140, 136, 136, 135, 142, 145, 143, 140, 142, 136, 137, 141, 137, 145, 147, 142, 142, 141, 141, 140, 140, 137, 140, 142, 137, 140, 138, 135, 139, 140, 140, 135, 136, 130, 132, 129, 129, 132, 127, 125, 126, 125, 127, 127, 129, 119, 124, 123, 119, 119, 119, 113, 118, 119, 116, 114, 114, 111, 114, 102, 108, 104, 103, 101, 106, 106, 103, 106, 102, 99, 99, 96, 95, 95, 94, 95, 90, 92, 86, 89, 86, 86, 80, 80, 83, 84, 76, 76, 75, 75, 77, 69, 73, 76, 72, 63, 64, 58, 57, 64, 67, 62, 60, 54, 54, 55, 49, 49, 54, 50, 48, 50, 49, 50, 44, 40, 14, 14, 11, 8, 14, 20, 16, 17, 19, 18, 20, 22, 25, 22, 24, 21, 23, 23, 28, 24, 29, 31, 35, 32, 29, 31, 33, 36, 37, 47, 45, 41, 54, 48, 44, 50, 49, 51, 54, 54, 50, 54, 57, 58, 58, 60, 65, 62, 65, 65, 64, 65, 68, 73, 72, 80, 72, 74, 80, 79, 82, 84, 89, 85, 86, 85, 86, 89, 92, 92, 91, 93, 95, 93, 93, 92, 97, 97, 102, 103, 100, 107, 106, 107, 106, 110, 106, 103, 111, 113, 113, 120, 125, 116, 120, 122, 115, 122, 120, 124, 122, 123, 128, 130, 127, 128, 131, 130, 133, 135, 135, 133, 133, 131, 130, 131, 126, 134, 132, 135, 134, 137, 133, 138, 135, 138, 141, 144, 140, 141, 141, 141, 140, 142, 136, 135, 139, 142, 143, 145, 135, 139, 132, 137, 146, 144, 142, 140, 140, 138, 138, 139, 137, 148, 143, 145, 136, 140, 146, 144, 139, 141, 136, 141, 136, 137, 137, 137, 137, 137, 136, 132, 138, 129, 133, 132, 130, 134, 127, 130, 126, 128, 126, 125, 125, 120, 122, 119, 117, 116, 120, 118, 117, 117, 115, 109, 110, 108, 112, 102, 108, 105, 110, 104, 102, 102, 106, 107, 102, 99, 97, 92, 93, 96, 96, 91, 84, 92, 84, 87, 86, 90, 87, 79, 85, 81, 78, 79, 77, 72, 73, 71, 75, 74, 67, 62, 62, 58, 59, 68, 67, 66, 58, 51, 54, 56, 51, 52, 56, 49, 48, 47, 49, 50, 50, 47, 16, 11, 11, 13, 10, 13, 14, 18, 13, 17, 18, 19, 24, 26, 26, 25, 22, 25, 25, 30, 31, 30, 33, 39, 35, 32, 31, 33, 37, 41, 47, 44, 40, 52, 51, 52, 52, 52, 54, 53, 57, 55, 53, 61, 58, 59, 61, 63, 62, 67, 63, 64, 67, 68, 76, 77, 79, 75, 77, 79, 76, 84, 85, 88, 89, 86, 88, 89, 91, 88, 89, 98, 99, 96, 98, 98, 95, 98, 100, 105, 105, 104, 107, 110, 114, 112, 115, 112, 109, 108, 109, 106, 109, 119, 117, 121, 122, 109, 114, 120, 119, 122, 120, 129, 126, 125, 127, 129, 136, 129, 133, 135, 136, 133, 129, 130, 132, 127, 135, 132, 136, 135, 135, 130, 136, 135, 137, 142, 142, 139, 145, 144, 139, 137, 140, 135, 137, 140, 147, 142, 145, 136, 142, 135, 144, 141, 141, 142, 146, 140, 145, 139, 139, 142, 149, 144, 151, 141, 140, 139, 140, 137, 144, 140, 138, 140, 136, 137, 140, 137, 138, 138, 133, 137, 130, 129, 133, 130, 132, 132, 135, 128, 134, 128, 120, 124, 125, 122, 120, 120, 119, 118, 120, 113, 115, 109, 109, 108, 108, 115, 107, 105, 102, 109, 108, 102, 103, 106, 111, 100, 101, 98, 97, 95, 95, 98, 92, 93, 92, 92, 88, 91, 83, 88, 80, 85, 81, 79, 74, 78, 72, 70, 74, 75, 72, 66, 64, 61, 61, 65, 67, 67, 65, 59, 50, 51, 50, 55, 54, 52, 49, 47, 47, 51, 53, 48, 45, 14, 11, 13, 10, 13, 10, 14, 14, 17, 15, 17, 18, 17, 24, 26, 25, 24, 23, 26, 25, 29, 33, 27, 32, 36, 35, 36, 35, 37, 38, 40, 46, 44, 42, 46, 51, 50, 47, 48, 51, 55, 54, 59, 58, 59, 57, 59, 61, 61, 65, 66, 68, 65, 66, 70, 78, 80, 76, 78, 77, 83, 80, 84, 88, 87, 85, 88, 85, 88, 87, 86, 95, 98, 101, 98, 99, 101, 99, 100, 101, 101, 104, 106, 105, 109, 112, 112, 115, 111, 112, 109, 110, 110, 109, 112, 115, 119, 119, 111, 110, 122, 118, 121, 125, 125, 123, 127, 130, 129, 133, 129, 133, 133, 134, 133, 130, 131, 135, 132, 132, 133, 138, 138, 133, 130, 135, 139, 135, 139, 147, 145, 143, 142, 140, 136, 133, 133, 144, 141, 141, 140, 142, 137, 142, 141, 149, 144, 144, 142, 144, 139, 143, 141, 144, 144, 145, 148, 142, 140, 143, 140, 145, 142, 137, 138, 140, 139, 139, 142, 136, 140, 136, 136, 136, 136, 131, 130, 134, 131, 133, 137, 135, 132, 133, 131, 122, 124, 124, 123, 124, 114, 116, 118, 118, 115, 115, 110, 108, 111, 113, 116, 111, 109, 105, 105, 108, 104, 105, 108, 107, 100, 103, 100, 97, 97, 91, 93, 92, 91, 89, 89, 84, 88, 80, 82, 84, 86, 81, 82, 78, 76, 74, 74, 76, 73, 70, 68, 64, 65, 64, 64, 65, 68, 63, 61, 53, 53, 51, 54, 55, 48, 49, 47, 47, 48, 50, 51, 47, 12, 14, 12, 13, 10, 15, 14, 14, 19, 17, 20, 19, 26, 26, 24, 23, 24, 25, 24, 28, 34, 29, 35, 36, 35, 36, 36, 35, 37, 40, 46, 44, 46, 46, 51, 47, 45, 48, 52, 58, 57, 58, 56, 58, 56, 59, 62, 62, 65, 64, 67, 67, 67, 67, 76, 76, 73, 77, 78, 81, 83, 85, 90, 87, 84, 90, 84, 85, 82, 91, 94, 96, 102, 102, 98, 99, 100, 102, 105, 102, 106, 107, 107, 107, 106, 109, 111, 120, 114, 113, 116, 111, 111, 115, 112, 114, 116, 117, 108, 120, 114, 120, 120, 124, 124, 130, 130, 131, 132, 126, 128, 127, 128, 132, 133, 133, 134, 136, 134, 134, 134, 139, 133, 133, 132, 136, 139, 139, 145, 142, 138, 136, 137, 135, 137, 136, 142, 142, 142, 143, 140, 140, 141, 143, 146, 144, 141, 146, 147, 143, 142, 140, 146, 144, 141, 148, 139, 142, 143, 141, 143, 143, 143, 143, 143, 138, 135, 139, 139, 140, 136, 137, 137, 136, 135, 134, 135, 136, 137, 137, 133, 131, 129, 130, 126, 123, 120, 123, 120, 117, 119, 121, 119, 119, 116, 115, 112, 116, 118, 115, 111, 114, 107, 107, 108, 103, 106, 107, 105, 104, 99, 100, 97, 94, 92, 96, 93, 90, 93, 87, 85, 86, 85, 85, 86, 89, 82, 82, 81, 74, 75, 78, 76, 72, 68, 66, 64, 68, 64, 61, 64, 66, 61, 60, 56, 57, 58, 57, 60, 48, 49, 48, 48, 46, 47, 52, 49, 13, 16, 15, 12, 12, 13, 15, 22, 15, 19, 21, 26, 22, 27, 23, 27, 25, 25, 29, 33, 33, 36, 36, 31, 36, 38, 38, 40, 41, 43, 42, 46, 47, 51, 49, 45, 50, 49, 53, 58, 57, 55, 57, 56, 60, 62, 64, 63, 61, 66, 68, 70, 73, 71, 72, 70, 77, 82, 77, 83, 84, 87, 84, 86, 83, 87, 84, 82, 91, 95, 95, 102, 99, 94, 96, 101, 102, 107, 104, 109, 107, 112, 111, 108, 111, 108, 123, 114, 118, 116, 116, 116, 119, 111, 113, 114, 115, 105, 110, 116, 119, 117, 124, 126, 130, 131, 134, 130, 122, 126, 124, 126, 134, 131, 134, 129, 135, 136, 139, 137, 137, 131, 133, 131, 133, 138, 136, 141, 136, 135, 132, 136, 133, 138, 140, 140, 144, 143, 145, 144, 143, 143, 144, 140, 145, 143, 146, 147, 143, 141, 142, 149, 143, 143, 144, 145, 145, 141, 144, 143, 140, 146, 143, 138, 135, 133, 138, 143, 140, 140, 143, 136, 136, 137, 134, 136, 140, 135, 132, 132, 129, 131, 128, 131, 125, 124, 123, 121, 125, 121, 125, 124, 120, 118, 119, 120, 118, 117, 113, 112, 114, 109, 109, 108, 106, 106, 108, 107, 107, 101, 98, 101, 96, 92, 95, 96, 93, 92, 91, 85, 84, 87, 85, 86, 89, 84, 81, 80, 74, 78, 80, 74, 72, 72, 68, 65, 68, 65, 62, 63, 65, 63, 57, 60, 61, 59, 58, 60, 48, 54, 52, 51, 47, 49, 52, 49, 13, 10, 17, 17, 14, 13, 15, 16, 17, 14, 18, 21, 22, 22, 25, 24, 27, 26, 30, 31, 34, 37, 38, 37, 33, 38, 40, 38, 39, 43, 44, 39, 47, 48, 49, 53, 48, 51, 54, 53, 56, 57, 49, 57, 62, 62, 63, 62, 65, 60, 65, 64, 71, 74, 77, 75, 74, 78, 79, 81, 78, 86, 82, 82, 86, 87, 87, 85, 89, 89, 95, 94, 99, 96, 94, 95, 95, 97, 107, 108, 108, 106, 113, 114, 112, 109, 113, 120, 117, 115, 118, 116, 121, 115, 116, 112, 116, 113, 111, 116, 118, 124, 119, 126, 129, 133, 131, 131, 130, 125, 125, 126, 128, 133, 132, 131, 133, 134, 133, 137, 137, 138, 137, 137, 136, 133, 131, 135, 138, 140, 131, 133, 133, 136, 136, 137, 135, 134, 148, 145, 144, 142, 142, 141, 138, 145, 142, 143, 143, 144, 140, 141, 148, 149, 142, 142, 140, 141, 137, 146, 141, 141, 145, 149, 138, 132, 137, 134, 145, 139, 140, 139, 139, 133, 135, 138, 137, 135, 135, 131, 136, 130, 134, 133, 126, 128, 127, 119, 120, 122, 121, 127, 126, 123, 118, 119, 118, 122, 115, 117, 118, 111, 113, 114, 107, 104, 103, 104, 110, 102, 99, 100, 102, 98, 91, 92, 94, 92, 89, 90, 85, 84, 86, 82, 86, 85, 84, 80, 80, 76, 75, 77, 71, 78, 76, 69, 67, 70, 65, 67, 65, 65, 64, 59, 63, 59, 57, 59, 57, 51, 55, 54, 55, 46, 46, 51, 50, 13, 14, 17, 16, 13, 16, 16, 15, 15, 17, 20, 23, 23, 25, 26, 26, 25, 29, 29, 38, 38, 35, 37, 39, 42, 40, 38, 40, 42, 44, 42, 43, 46, 50, 50, 55, 52, 60, 58, 50, 49, 52, 59, 64, 60, 61, 65, 67, 71, 68, 62, 70, 75, 78, 75, 73, 80, 80, 84, 79, 84, 80, 84, 85, 86, 86, 80, 84, 94, 95, 95, 93, 94, 98, 95, 93, 99, 102, 99, 101, 107, 108, 106, 113, 108, 115, 120, 118, 113, 118, 122, 120, 113, 119, 123, 119, 115, 117, 116, 117, 120, 117, 122, 129, 136, 131, 130, 129, 126, 125, 130, 129, 127, 127, 129, 132, 130, 129, 134, 133, 134, 139, 141, 144, 140, 138, 137, 136, 137, 135, 136, 138, 143, 138, 137, 136, 137, 132, 141, 141, 147, 142, 134, 145, 142, 142, 143, 141, 142, 136, 144, 140, 149, 139, 141, 143, 143, 139, 142, 140, 142, 143, 147, 139, 135, 137, 137, 143, 137, 144, 138, 139, 139, 137, 135, 138, 134, 135, 132, 134, 133, 134, 135, 131, 129, 122, 123, 120, 125, 125, 122, 125, 124, 119, 120, 115, 118, 114, 120, 122, 118, 114, 113, 105, 100, 100, 105, 108, 101, 101, 96, 98, 96, 96, 96, 94, 94, 88, 96, 86, 83, 86, 82, 87, 87, 86, 81, 81, 77, 74, 76, 71, 79, 77, 71, 70, 63, 67, 72, 66, 68, 67, 63, 63, 57, 57, 62, 54, 50, 59, 56, 54, 48, 49, 50, 49, 15, 12, 17, 16, 15, 18, 17, 15, 16, 16, 23, 24, 20, 20, 25, 26, 28, 28, 29, 32, 37, 34, 37, 36, 39, 41, 44, 46, 46, 38, 42, 45, 53, 57, 46, 55, 51, 61, 52, 53, 56, 58, 61, 60, 61, 64, 67, 64, 63, 66, 68, 71, 72, 76, 81, 79, 76, 76, 81, 78, 84, 84, 80, 83, 84, 90, 86, 87, 93, 93, 92, 94, 98, 98, 97, 96, 99, 98, 96, 99, 103, 110, 106, 109, 109, 111, 112, 116, 114, 118, 125, 112, 117, 116, 121, 119, 117, 122, 116, 120, 115, 119, 122, 127, 135, 131, 126, 126, 132, 129, 133, 131, 126, 124, 131, 131, 134, 134, 134, 135, 134, 138, 141, 146, 143, 140, 135, 146, 139, 141, 134, 138, 138, 142, 137, 140, 148, 137, 138, 144, 145, 140, 141, 142, 139, 138, 141, 143, 144, 139, 145, 142, 147, 145, 144, 147, 143, 144, 141, 139, 142, 146, 143, 141, 137, 135, 138, 138, 139, 142, 141, 138, 137, 139, 131, 138, 135, 136, 134, 130, 132, 134, 130, 133, 131, 125, 127, 125, 124, 123, 123, 125, 123, 115, 116, 117, 111, 114, 119, 118, 122, 115, 112, 108, 104, 107, 107, 105, 102, 103, 93, 98, 96, 94, 94, 96, 99, 88, 90, 89, 85, 88, 85, 90, 89, 85, 80, 82, 77, 75, 81, 83, 80, 71, 72, 68, 63, 67, 69, 68, 64, 65, 67, 65, 63, 64, 59, 60, 56, 57, 50, 50, 48, 55, 51, 49, 11, 13, 10, 14, 13, 18, 17, 16, 17, 17, 16, 20, 22, 19, 19, 22, 25, 30, 27, 31, 31, 39, 38, 41, 37, 40, 47, 44, 45, 42, 43, 44, 50, 52, 54, 53, 55, 51, 60, 49, 57, 59, 61, 59, 60, 61, 64, 63, 63, 65, 69, 72, 71, 69, 70, 74, 76, 80, 81, 80, 78, 82, 86, 81, 85, 86, 89, 88, 90, 91, 93, 96, 97, 105, 101, 99, 96, 94, 95, 94, 98, 101, 103, 105, 109, 110, 110, 112, 118, 113, 114, 117, 116, 124, 120, 120, 119, 118, 122, 120, 120, 115, 123, 125, 125, 130, 130, 127, 128, 129, 128, 131, 131, 130, 129, 136, 137, 137, 139, 141, 137, 139, 139, 138, 143, 139, 144, 142, 149, 141, 146, 142, 147, 141, 142, 140, 149, 150, 155, 147, 137, 143, 136, 135, 147, 146, 141, 141, 140, 142, 144, 142, 146, 139, 145, 145, 144, 141, 142, 140, 140, 141, 145, 145, 143, 138, 136, 136, 138, 139, 138, 145, 136, 136, 137, 134, 136, 135, 136, 138, 133, 132, 130, 126, 129, 129, 129, 128, 124, 123, 126, 126, 128, 124, 122, 117, 111, 112, 120, 116, 115, 117, 117, 111, 110, 104, 104, 110, 105, 105, 102, 96, 92, 94, 92, 92, 99, 95, 92, 87, 92, 86, 88, 85, 87, 88, 83, 78, 81, 77, 77, 75, 78, 77, 71, 73, 69, 66, 64, 67, 69, 69, 70, 71, 65, 64, 64, 61, 66, 57, 59, 52, 53, 48, 54, 54, 51, 11, 11, 14, 12, 15, 15, 14, 17, 16, 18, 18, 22, 20, 16, 21, 23, 27, 27, 35, 33, 38, 37, 40, 38, 37, 41, 40, 44, 40, 44, 44, 53, 50, 50, 57, 53, 52, 57, 54, 60, 59, 66, 61, 63, 56, 62, 62, 65, 66, 68, 69, 70, 70, 75, 75, 75, 76, 77, 80, 82, 82, 83, 80, 81, 83, 86, 87, 85, 94, 95, 99, 98, 102, 103, 102, 101, 101, 101, 98, 97, 104, 103, 104, 110, 110, 106, 109, 113, 110, 114, 116, 119, 120, 121, 121, 115, 117, 118, 123, 121, 121, 123, 126, 127, 127, 127, 128, 128, 128, 130, 135, 135, 135, 131, 133, 139, 135, 138, 141, 139, 141, 137, 137, 140, 138, 143, 144, 145, 147, 142, 139, 144, 145, 143, 156, 198, 203, 199, 195, 150, 144, 142, 136, 148, 144, 140, 144, 141, 144, 144, 144, 143, 139, 142, 144, 143, 140, 137, 142, 141, 140, 143, 147, 143, 138, 139, 136, 142, 140, 140, 145, 137, 139, 130, 137, 136, 135, 136, 137, 135, 133, 128, 128, 129, 128, 131, 127, 123, 128, 127, 126, 124, 115, 120, 122, 115, 115, 121, 114, 111, 107, 112, 107, 109, 107, 106, 109, 101, 103, 101, 98, 95, 95, 94, 92, 92, 94, 91, 91, 93, 91, 88, 85, 86, 90, 85, 81, 80, 79, 79, 80, 78, 80, 79, 73, 72, 68, 60, 68, 71, 70, 71, 70, 66, 63, 65, 61, 60, 57, 57, 50, 53, 47, 52, 52, 50, 14, 13, 15, 14, 13, 15, 14, 16, 17, 19, 17, 23, 22, 19, 22, 22, 24, 28, 36, 35, 38, 40, 39, 37, 35, 36, 38, 43, 41, 40, 44, 50, 49, 52, 57, 52, 58, 58, 55, 60, 62, 65, 62, 64, 56, 64, 66, 65, 65, 72, 73, 71, 66, 71, 75, 77, 81, 80, 79, 83, 86, 80, 80, 78, 82, 83, 84, 88, 92, 98, 95, 100, 102, 102, 105, 107, 103, 108, 103, 100, 101, 110, 104, 108, 112, 107, 108, 110, 111, 115, 112, 114, 116, 120, 119, 118, 115, 117, 123, 122, 126, 123, 124, 131, 128, 129, 128, 128, 131, 132, 133, 133, 134, 133, 135, 135, 136, 136, 135, 142, 141, 137, 138, 140, 140, 141, 144, 147, 145, 141, 140, 141, 144, 142, 144, 213, 241, 234, 203, 140, 143, 144, 142, 140, 143, 138, 143, 144, 146, 143, 147, 144, 147, 148, 148, 144, 139, 140, 147, 141, 141, 146, 145, 139, 138, 140, 139, 142, 145, 140, 144, 138, 137, 130, 138, 136, 135, 137, 136, 131, 131, 130, 128, 129, 130, 132, 125, 125, 128, 121, 130, 115, 88, 118, 117, 119, 115, 117, 116, 113, 107, 109, 108, 108, 107, 106, 105, 100, 99, 99, 96, 101, 94, 93, 93, 92, 96, 94, 94, 92, 90, 89, 87, 87, 93, 87, 84, 79, 80, 82, 80, 81, 83, 80, 77, 72, 69, 61, 68, 74, 71, 72, 66, 66, 62, 68, 64, 61, 59, 56, 54, 52, 48, 50, 49, 48, 13, 15, 14, 13, 15, 16, 14, 14, 16, 17, 22, 23, 22, 22, 19, 21, 22, 29, 34, 38, 37, 39, 37, 37, 35, 37, 41, 40, 44, 38, 44, 46, 49, 55, 58, 54, 56, 57, 59, 60, 63, 62, 63, 65, 61, 63, 66, 66, 66, 72, 70, 71, 69, 68, 75, 74, 82, 81, 81, 84, 89, 80, 81, 81, 85, 79, 84, 90, 92, 97, 96, 95, 99, 104, 104, 106, 107, 109, 102, 110, 106, 105, 109, 115, 108, 105, 110, 109, 111, 116, 116, 114, 117, 118, 119, 123, 116, 121, 122, 122, 121, 123, 123, 132, 128, 127, 129, 133, 130, 131, 130, 131, 132, 130, 133, 133, 133, 138, 138, 138, 136, 136, 139, 140, 144, 145, 150, 146, 141, 147, 142, 139, 140, 127, 103, 136, 222, 209, 133, 106, 130, 147, 142, 142, 141, 140, 144, 146, 143, 144, 141, 147, 147, 148, 146, 145, 137, 141, 141, 143, 144, 143, 145, 138, 143, 141, 145, 139, 146, 138, 141, 138, 136, 137, 138, 137, 134, 136, 138, 134, 130, 132, 133, 128, 127, 131, 124, 127, 127, 127, 127, 118, 109, 122, 115, 122, 121, 111, 117, 113, 114, 110, 111, 109, 106, 105, 102, 107, 99, 98, 94, 100, 94, 91, 92, 97, 95, 98, 85, 90, 87, 88, 87, 85, 92, 84, 84, 78, 82, 82, 79, 77, 79, 81, 81, 74, 66, 68, 72, 71, 68, 69, 62, 66, 60, 68, 66, 59, 58, 56, 59, 49, 47, 47, 49, 49, 7, 11, 18, 16, 11, 14, 18, 14, 17, 18, 25, 24, 21, 22, 16, 19, 25, 34, 37, 36, 37, 37, 37, 32, 39, 41, 40, 41, 39, 43, 41, 47, 50, 54, 52, 51, 52, 54, 60, 62, 61, 71, 65, 64, 62, 66, 71, 67, 70, 72, 74, 78, 73, 68, 73, 67, 83, 84, 78, 81, 88, 86, 83, 88, 87, 80, 85, 86, 91, 95, 100, 92, 92, 97, 104, 100, 108, 105, 103, 109, 107, 108, 109, 116, 107, 107, 113, 113, 107, 113, 117, 112, 113, 119, 122, 120, 119, 118, 120, 116, 118, 120, 124, 123, 124, 125, 131, 127, 132, 127, 131, 130, 124, 133, 132, 130, 138, 132, 136, 138, 135, 139, 132, 141, 142, 139, 145, 148, 144, 141, 142, 142, 147, 82, 164, 214, 218, 214, 180, 63, 96, 152, 137, 145, 147, 146, 143, 149, 143, 141, 138, 137, 152, 145, 141, 144, 139, 143, 146, 146, 142, 144, 143, 142, 144, 140, 141, 139, 142, 142, 138, 136, 135, 133, 135, 138, 136, 133, 136, 131, 134, 131, 135, 130, 132, 127, 125, 126, 123, 127, 126, 123, 125, 123, 111, 118, 112, 115, 115, 116, 112, 112, 108, 111, 107, 108, 112, 109, 103, 98, 98, 94, 98, 94, 95, 96, 99, 97, 88, 89, 88, 95, 91, 88, 84, 84, 82, 82, 77, 78, 80, 77, 81, 77, 80, 75, 76, 71, 74, 74, 76, 70, 66, 69, 61, 72, 63, 61, 52, 62, 57, 50, 45, 50, 49, 46, 9, 12, 17, 14, 12, 13, 17, 16, 18, 19, 21, 21, 21, 22, 18, 20, 25, 27, 36, 36, 36, 36, 36, 37, 37, 40, 39, 40, 45, 43, 38, 48, 48, 56, 55, 47, 51, 51, 55, 63, 61, 64, 65, 63, 65, 67, 68, 69, 72, 77, 77, 79, 76, 71, 70, 69, 83, 85, 79, 82, 86, 83, 85, 87, 88, 84, 87, 85, 92, 91, 96, 93, 94, 96, 102, 102, 104, 100, 105, 105, 107, 110, 117, 119, 115, 114, 111, 114, 112, 114, 118, 117, 117, 119, 121, 119, 119, 116, 114, 120, 119, 121, 123, 123, 128, 128, 121, 121, 129, 127, 131, 129, 127, 130, 132, 135, 135, 132, 138, 134, 135, 134, 133, 139, 141, 138, 145, 146, 144, 142, 142, 147, 148, 63, 181, 89, 21, 15, 8, 25, 72, 145, 142, 144, 146, 145, 142, 145, 148, 143, 142, 141, 148, 148, 145, 144, 141, 143, 144, 141, 142, 143, 143, 148, 144, 141, 133, 140, 142, 142, 137, 134, 143, 137, 138, 135, 139, 140, 136, 133, 135, 130, 129, 127, 127, 128, 127, 123, 125, 125, 131, 125, 127, 125, 119, 115, 109, 112, 116, 111, 111, 108, 108, 110, 103, 106, 114, 109, 106, 103, 99, 92, 93, 92, 95, 97, 97, 100, 89, 91, 91, 96, 89, 88, 92, 88, 85, 83, 75, 79, 79, 80, 82, 81, 75, 72, 68, 71, 75, 77, 74, 74, 68, 65, 63, 62, 56, 54, 55, 59, 56, 51, 48, 51, 53, 46, 13, 10, 13, 19, 15, 14, 14, 19, 19, 19, 19, 19, 22, 22, 18, 20, 22, 26, 26, 33, 38, 34, 36, 36, 38, 39, 38, 39, 39, 42, 44, 43, 49, 52, 53, 58, 51, 50, 53, 58, 64, 63, 62, 62, 58, 64, 70, 69, 66, 71, 78, 79, 80, 81, 82, 77, 77, 83, 85, 81, 82, 83, 83, 88, 88, 87, 87, 90, 89, 93, 91, 95, 93, 91, 95, 102, 108, 105, 101, 106, 103, 106, 109, 115, 115, 115, 117, 116, 115, 114, 119, 122, 114, 118, 119, 121, 117, 119, 118, 115, 117, 121, 118, 123, 125, 131, 128, 124, 124, 126, 132, 128, 131, 126, 132, 132, 138, 135, 134, 141, 139, 139, 135, 140, 140, 143, 137, 142, 147, 145, 143, 143, 144, 141, 49, 197, 64, 1, 1, 4, 28, 48, 141, 147, 137, 142, 142, 141, 144, 150, 146, 143, 143, 149, 147, 146, 140, 138, 142, 143, 143, 146, 143, 140, 145, 145, 146, 140, 144, 142, 138, 143, 138, 141, 133, 136, 135, 136, 132, 131, 136, 133, 132, 131, 132, 133, 127, 125, 127, 128, 125, 128, 124, 127, 127, 124, 114, 112, 109, 115, 109, 113, 108, 108, 108, 103, 103, 107, 107, 104, 102, 101, 91, 92, 94, 96, 103, 95, 96, 89, 86, 88, 91, 91, 92, 88, 90, 84, 83, 80, 77, 79, 80, 78, 83, 77, 72, 72, 75, 74, 75, 75, 70, 65, 64, 68, 62, 63, 54, 58, 55, 53, 53, 51, 48, 57, 49, 13, 10, 12, 23, 18, 16, 17, 19, 21, 21, 20, 20, 22, 23, 22, 21, 22, 25, 30, 32, 38, 33, 39, 38, 39, 42, 40, 42, 43, 40, 43, 46, 45, 52, 52, 57, 50, 49, 50, 57, 61, 63, 65, 61, 60, 64, 70, 70, 69, 70, 73, 77, 82, 80, 84, 84, 85, 88, 87, 84, 83, 81, 85, 88, 89, 90, 89, 88, 91, 90, 91, 94, 89, 92, 100, 103, 109, 104, 107, 107, 109, 106, 111, 112, 117, 118, 123, 118, 116, 118, 122, 121, 124, 123, 120, 122, 120, 120, 117, 120, 119, 125, 120, 122, 124, 130, 128, 128, 127, 128, 133, 129, 129, 129, 132, 128, 140, 136, 136, 135, 136, 141, 137, 140, 137, 139, 138, 143, 144, 143, 141, 142, 142, 133, 33, 206, 51, 1, 4, 31, 19, 135, 144, 137, 137, 141, 142, 146, 149, 147, 145, 146, 147, 143, 143, 144, 141, 141, 144, 144, 143, 142, 139, 141, 144, 142, 141, 138, 145, 138, 140, 141, 137, 135, 138, 132, 134, 131, 129, 133, 132, 130, 123, 129, 135, 128, 129, 124, 125, 125, 127, 128, 126, 125, 121, 114, 114, 110, 114, 112, 113, 109, 106, 107, 105, 104, 107, 109, 103, 99, 99, 92, 91, 95, 98, 105, 96, 93, 94, 85, 86, 87, 89, 89, 88, 87, 81, 83, 81, 76, 81, 80, 77, 79, 74, 74, 72, 68, 71, 76, 73, 67, 65, 66, 65, 61, 64, 55, 56, 54, 52, 50, 50, 49, 53, 48, 12, 14, 21, 19, 17, 19, 18, 20, 22, 24, 27, 26, 24, 26, 22, 25, 28, 36, 39, 39, 34, 40, 40, 40, 43, 45, 44, 46, 45, 44, 44, 46, 49, 51, 53, 47, 55, 54, 58, 60, 63, 63, 63, 61, 67, 70, 69, 73, 73, 72, 75, 81, 77, 85, 81, 83, 88, 86, 86, 83, 82, 87, 86, 88, 92, 90, 88, 93, 92, 93, 93, 92, 90, 100, 101, 107, 105, 106, 105, 111, 103, 107, 105, 114, 116, 120, 118, 118, 122, 119, 122, 126, 124, 120, 122, 122, 120, 118, 123, 125, 124, 123, 122, 125, 127, 127, 131, 130, 133, 134, 131, 128, 132, 133, 128, 137, 135, 138, 137, 136, 138, 134, 136, 138, 141, 140, 144, 143, 141, 143, 145, 136, 124, 32, 206, 46, 1, 2, 5, 29, 11, 125, 140, 136, 137, 142, 142, 145, 143, 144, 143, 144, 142, 141, 140, 144, 142, 144, 145, 144, 142, 140, 136, 142, 146, 143, 139, 139, 139, 140, 140, 142, 137, 139, 139, 133, 135, 132, 131, 131, 131, 132, 125, 131, 132, 128, 130, 126, 127, 125, 125, 126, 125, 121, 120, 118, 113, 110, 110, 110, 107, 107, 105, 107, 105, 103, 105, 108, 105, 106, 103, 99, 88, 94, 101, 100, 99, 96, 97, 86, 89, 89, 90, 90, 95, 86, 80, 81, 81, 77, 81, 80, 79, 78, 74, 76, 72, 69, 72, 72, 71, 68, 65, 67, 63, 62, 63, 62, 57, 53, 52, 49, 49, 48, 48, 47, 13, 15, 17, 17, 15, 17, 17, 21, 20, 24, 26, 29, 27, 26, 23, 25, 28, 36, 41, 42, 38, 42, 41, 39, 41, 46, 43, 46, 47, 46, 48, 53, 48, 49, 52, 50, 52, 51, 59, 62, 63, 59, 66, 64, 70, 71, 69, 73, 74, 75, 73, 79, 75, 81, 77, 82, 88, 89, 86, 84, 85, 89, 89, 89, 88, 89, 92, 91, 93, 97, 92, 91, 94, 98, 98, 103, 101, 102, 106, 109, 105, 106, 107, 113, 118, 115, 120, 116, 118, 114, 123, 128, 126, 126, 121, 122, 119, 127, 126, 130, 124, 126, 124, 127, 124, 126, 130, 132, 129, 130, 128, 132, 132, 138, 134, 137, 139, 136, 136, 132, 135, 134, 137, 143, 149, 143, 143, 146, 140, 141, 140, 132, 114, 40, 207, 37, 2, 1, 1, 29, 12, 108, 139, 136, 140, 144, 141, 143, 141, 142, 143, 145, 145, 141, 141, 150, 147, 146, 140, 139, 145, 144, 141, 140, 145, 145, 139, 143, 142, 137, 139, 137, 135, 137, 137, 139, 135, 135, 133, 128, 133, 129, 128, 130, 127, 129, 128, 125, 127, 127, 126, 126, 125, 118, 124, 121, 112, 109, 112, 109, 110, 108, 106, 108, 104, 101, 108, 109, 108, 108, 103, 103, 93, 94, 104, 97, 98, 95, 92, 85, 87, 87, 91, 90, 91, 87, 81, 77, 83, 77, 79, 79, 79, 80, 80, 78, 71, 66, 68, 69, 73, 68, 62, 66, 65, 65, 65, 66, 58, 48, 52, 50, 50, 46, 48, 48, 9, 15, 14, 13, 11, 16, 18, 24, 17, 23, 24, 27, 22, 21, 25, 24, 29, 38, 39, 40, 40, 43, 42, 40, 41, 43, 44, 47, 48, 46, 49, 50, 49, 49, 49, 56, 54, 53, 58, 58, 60, 60, 68, 73, 70, 69, 71, 74, 69, 78, 71, 77, 75, 84, 83, 85, 86, 90, 83, 85, 91, 92, 93, 90, 88, 88, 92, 94, 94, 104, 95, 88, 96, 96, 101, 106, 102, 98, 106, 99, 107, 106, 113, 112, 122, 111, 123, 113, 117, 117, 122, 126, 124, 124, 121, 131, 122, 125, 125, 137, 133, 133, 123, 125, 126, 133, 130, 135, 128, 129, 127, 130, 131, 135, 137, 138, 146, 134, 137, 140, 138, 139, 140, 141, 147, 149, 147, 146, 133, 140, 136, 136, 106, 49, 196, 35, 2, 5, 1, 25, 18, 98, 138, 139, 141, 144, 141, 144, 147, 142, 145, 148, 141, 142, 138, 146, 143, 144, 146, 139, 145, 143, 143, 145, 144, 140, 139, 142, 138, 135, 145, 135, 137, 139, 138, 141, 134, 133, 132, 131, 133, 129, 133, 128, 133, 136, 127, 128, 125, 130, 125, 127, 125, 117, 122, 116, 111, 104, 113, 108, 113, 108, 106, 106, 108, 105, 109, 111, 108, 106, 105, 101, 103, 96, 104, 98, 97, 93, 90, 90, 85, 89, 89, 88, 93, 85, 85, 79, 82, 78, 79, 82, 82, 83, 77, 70, 75, 72, 69, 73, 76, 67, 64, 66, 65, 67, 63, 59, 63, 50, 51, 48, 50, 49, 49, 48, 15, 18, 16, 15, 15, 18, 18, 18, 17, 24, 21, 24, 18, 21, 21, 29, 39, 37, 42, 38, 44, 38, 42, 45, 47, 46, 49, 46, 48, 46, 52, 54, 51, 51, 55, 59, 54, 51, 52, 61, 66, 65, 65, 70, 68, 74, 72, 69, 69, 77, 79, 78, 81, 83, 84, 86, 91, 88, 85, 90, 88, 86, 87, 85, 84, 92, 94, 95, 95, 97, 95, 92, 102, 97, 99, 105, 104, 103, 104, 105, 108, 106, 106, 113, 113, 111, 120, 114, 114, 120, 118, 125, 127, 127, 124, 125, 124, 127, 128, 130, 130, 133, 128, 131, 131, 127, 136, 130, 132, 134, 129, 134, 132, 133, 135, 143, 143, 139, 139, 141, 137, 136, 147, 140, 145, 143, 141, 143, 140, 139, 142, 141, 109, 48, 179, 33, 2, 17, 3, 32, 21, 111, 147, 143, 145, 139, 145, 141, 147, 148, 143, 149, 145, 147, 143, 137, 141, 146, 147, 144, 148, 139, 144, 142, 143, 138, 143, 139, 142, 141, 140, 139, 139, 136, 138, 134, 137, 130, 132, 138, 136, 132, 136, 132, 134, 136, 130, 126, 123, 126, 122, 127, 122, 120, 116, 120, 112, 102, 109, 116, 117, 107, 110, 101, 101, 105, 105, 105, 108, 107, 104, 102, 98, 101, 103, 100, 102, 94, 92, 91, 92, 90, 92, 84, 87, 86, 85, 80, 82, 81, 83, 84, 84, 80, 78, 74, 67, 71, 71, 76, 73, 69, 67, 64, 63, 66, 66, 62, 64, 58, 51, 46, 52, 51, 50, 53, 14, 17, 14, 16, 15, 20, 16, 17, 21, 23, 22, 22, 25, 22, 27, 29, 34, 39, 39, 39, 43, 40, 42, 43, 45, 50, 49, 49, 46, 51, 53, 57, 56, 54, 60, 57, 57, 50, 53, 57, 58, 65, 67, 67, 70, 74, 71, 73, 72, 76, 78, 80, 81, 82, 83, 88, 90, 85, 90, 89, 86, 87, 84, 82, 86, 86, 92, 95, 96, 96, 98, 102, 103, 95, 98, 107, 105, 106, 107, 112, 114, 112, 106, 112, 113, 114, 110, 118, 115, 120, 118, 127, 125, 125, 124, 124, 127, 124, 129, 132, 128, 129, 130, 129, 132, 132, 134, 131, 132, 131, 131, 136, 136, 138, 138, 138, 140, 142, 141, 140, 139, 137, 144, 142, 143, 147, 147, 147, 142, 137, 141, 149, 137, 60, 157, 33, 5, 23, 7, 37, 45, 144, 173, 156, 143, 140, 139, 144, 144, 150, 142, 144, 147, 149, 142, 141, 147, 147, 144, 143, 145, 141, 142, 140, 139, 139, 145, 138, 144, 144, 140, 137, 138, 141, 137, 134, 134, 131, 133, 137, 138, 134, 129, 134, 132, 133, 129, 128, 123, 126, 125, 126, 119, 120, 114, 114, 110, 100, 107, 113, 114, 108, 113, 106, 105, 107, 109, 105, 108, 111, 98, 100, 95, 102, 105, 98, 106, 93, 95, 95, 95, 98, 94, 89, 90, 87, 84, 82, 84, 81, 83, 86, 85, 81, 73, 70, 68, 70, 74, 71, 71, 72, 68, 66, 60, 64, 61, 64, 60, 56, 53, 54, 50, 54, 48, 53, 16, 16, 13, 15, 13, 17, 15, 16, 21, 24, 20, 23, 25, 26, 30, 30, 30, 40, 39, 40, 43, 43, 42, 44, 46, 47, 49, 46, 48, 53, 57, 60, 58, 54, 62, 57, 57, 53, 53, 56, 59, 63, 66, 69, 70, 73, 72, 74, 76, 79, 81, 81, 77, 83, 81, 86, 88, 87, 89, 86, 89, 91, 91, 89, 87, 87, 93, 91, 98, 100, 102, 105, 102, 96, 104, 109, 112, 112, 114, 113, 109, 113, 111, 116, 114, 117, 115, 113, 114, 114, 119, 122, 124, 125, 125, 126, 127, 124, 131, 133, 131, 128, 129, 127, 134, 136, 128, 131, 133, 128, 131, 133, 136, 137, 137, 138, 144, 141, 145, 139, 137, 141, 141, 143, 146, 150, 146, 147, 144, 136, 141, 156, 177, 108, 153, 65, 51, 41, 59, 94, 117, 157, 180, 172, 145, 143, 145, 144, 145, 145, 143, 144, 143, 147, 142, 140, 142, 146, 143, 142, 144, 147, 146, 142, 145, 146, 140, 136, 142, 141, 139, 139, 135, 136, 133, 134, 134, 131, 134, 138, 134, 134, 133, 132, 133, 131, 128, 128, 130, 128, 126, 125, 118, 117, 114, 114, 110, 98, 110, 111, 112, 110, 113, 109, 107, 108, 108, 107, 110, 111, 99, 97, 96, 100, 103, 99, 100, 91, 94, 96, 98, 99, 96, 91, 88, 90, 87, 83, 78, 79, 78, 84, 83, 79, 74, 73, 72, 71, 73, 74, 72, 71, 65, 68, 62, 62, 59, 63, 60, 55, 53, 56, 48, 52, 45, 51, 21, 16, 15, 14, 14, 17, 18, 19, 19, 23, 19, 23, 23, 29, 31, 34, 32, 40, 41, 39, 42, 41, 40, 44, 46, 42, 49, 45, 51, 55, 60, 63, 58, 56, 60, 59, 59, 61, 61, 55, 56, 59, 65, 68, 68, 70, 73, 74, 75, 78, 79, 80, 78, 81, 81, 84, 83, 92, 91, 86, 95, 90, 92, 94, 92, 92, 92, 94, 99, 100, 100, 100, 104, 99, 107, 105, 107, 113, 114, 116, 112, 115, 118, 119, 114, 121, 121, 113, 115, 114, 120, 120, 126, 129, 126, 125, 129, 129, 131, 130, 130, 129, 129, 129, 137, 135, 133, 131, 131, 133, 134, 134, 137, 140, 141, 140, 142, 144, 141, 139, 139, 145, 143, 143, 149, 149, 146, 148, 143, 139, 144, 151, 168, 196, 226, 202, 194, 183, 206, 209, 198, 116, 100, 148, 145, 142, 148, 144, 147, 140, 145, 146, 139, 145, 141, 139, 136, 141, 144, 143, 145, 148, 145, 142, 144, 146, 134, 136, 143, 143, 136, 135, 136, 132, 133, 134, 136, 131, 132, 137, 133, 135, 134, 132, 132, 130, 126, 125, 130, 125, 122, 126, 124, 117, 115, 113, 110, 102, 114, 111, 113, 114, 117, 110, 107, 108, 105, 109, 110, 110, 105, 95, 102, 101, 102, 102, 96, 93, 94, 93, 95, 94, 95, 91, 86, 86, 87, 87, 80, 82, 82, 86, 86, 81, 79, 73, 76, 74, 72, 73, 72, 72, 65, 62, 64, 60, 59, 61, 64, 58, 54, 50, 47, 51, 49, 51, 19, 14, 17, 14, 16, 16, 16, 23, 20, 23, 27, 22, 24, 26, 31, 36, 38, 38, 38, 35, 38, 38, 39, 49, 46, 43, 49, 48, 49, 50, 55, 59, 57, 56, 57, 58, 62, 67, 64, 57, 64, 62, 66, 65, 71, 70, 71, 72, 78, 79, 78, 78, 76, 81, 82, 81, 81, 92, 92, 88, 94, 93, 89, 92, 95, 91, 95, 98, 98, 100, 102, 104, 107, 101, 106, 108, 101, 106, 109, 109, 110, 113, 115, 118, 119, 122, 116, 115, 119, 117, 120, 120, 125, 131, 129, 124, 129, 130, 132, 131, 128, 132, 134, 132, 136, 136, 139, 132, 134, 137, 135, 135, 137, 138, 141, 142, 140, 140, 139, 142, 138, 141, 143, 143, 147, 151, 146, 146, 140, 141, 132, 128, 138, 149, 201, 210, 206, 203, 199, 178, 119, 88, 96, 134, 150, 147, 141, 147, 146, 143, 145, 150, 146, 146, 143, 138, 137, 142, 142, 145, 147, 148, 145, 138, 142, 147, 134, 141, 142, 142, 138, 138, 141, 133, 133, 133, 143, 136, 133, 134, 134, 135, 133, 133, 137, 131, 130, 128, 131, 129, 125, 124, 121, 121, 119, 119, 120, 111, 114, 116, 117, 115, 115, 110, 108, 112, 108, 108, 109, 108, 107, 100, 105, 106, 100, 98, 96, 98, 101, 95, 91, 92, 93, 92, 88, 85, 86, 84, 81, 83, 82, 80, 83, 83, 75, 70, 72, 71, 75, 69, 74, 68, 67, 59, 61, 60, 61, 58, 61, 57, 55, 47, 50, 48, 55, 52, 17, 14, 18, 13, 15, 13, 15, 23, 21, 23, 26, 22, 25, 27, 31, 35, 39, 37, 35, 41, 40, 40, 37, 47, 46, 47, 49, 51, 47, 50, 54, 58, 57, 58, 57, 58, 63, 61, 65, 59, 65, 59, 66, 69, 73, 70, 73, 73, 75, 79, 80, 80, 78, 84, 82, 79, 85, 91, 90, 92, 95, 102, 93, 91, 94, 93, 98, 97, 97, 101, 99, 98, 109, 103, 105, 111, 106, 109, 115, 113, 110, 116, 119, 120, 123, 120, 115, 115, 122, 118, 122, 125, 128, 128, 125, 120, 125, 128, 133, 134, 130, 133, 136, 132, 132, 134, 136, 134, 136, 136, 132, 133, 136, 134, 138, 138, 145, 144, 148, 142, 141, 141, 144, 147, 148, 146, 143, 146, 145, 147, 143, 136, 92, 121, 126, 130, 136, 127, 118, 93, 80, 99, 155, 151, 147, 146, 135, 140, 139, 146, 150, 149, 149, 144, 143, 147, 146, 143, 143, 146, 143, 143, 138, 138, 145, 147, 140, 143, 145, 141, 140, 137, 137, 136, 135, 137, 142, 136, 132, 134, 139, 137, 134, 130, 139, 132, 134, 134, 129, 123, 122, 124, 124, 126, 121, 120, 123, 114, 112, 122, 120, 123, 119, 118, 111, 114, 113, 107, 108, 107, 108, 100, 100, 107, 102, 101, 105, 95, 91, 92, 91, 92, 93, 90, 91, 84, 80, 80, 80, 84, 79, 78, 82, 85, 76, 74, 71, 71, 77, 74, 75, 64, 65, 62, 57, 60, 62, 57, 57, 58, 58, 57, 56, 50, 54, 50, 22, 20, 20, 13, 12, 13, 18, 19, 18, 22, 18, 23, 24, 33, 32, 34, 38, 38, 36, 40, 36, 38, 38, 46, 45, 46, 49, 51, 50, 50, 56, 56, 55, 58, 60, 60, 63, 57, 68, 61, 65, 66, 67, 69, 69, 68, 74, 73, 78, 76, 77, 78, 79, 82, 83, 80, 88, 87, 86, 91, 90, 97, 95, 93, 93, 97, 95, 96, 96, 103, 101, 101, 107, 105, 102, 105, 108, 104, 112, 115, 111, 112, 115, 113, 118, 122, 119, 121, 122, 123, 119, 121, 129, 126, 123, 128, 125, 129, 134, 133, 130, 129, 130, 131, 132, 129, 135, 134, 133, 137, 134, 136, 139, 135, 141, 138, 139, 141, 141, 140, 144, 142, 141, 146, 148, 145, 146, 147, 142, 146, 144, 162, 183, 142, 150, 146, 148, 146, 144, 133, 147, 188, 161, 150, 146, 149, 147, 141, 145, 142, 148, 151, 147, 140, 143, 144, 146, 146, 144, 146, 141, 145, 145, 145, 139, 140, 144, 143, 142, 141, 137, 136, 139, 139, 139, 142, 137, 135, 136, 137, 138, 133, 133, 130, 129, 135, 133, 130, 130, 126, 121, 125, 129, 126, 119, 118, 119, 115, 113, 122, 120, 120, 116, 119, 112, 113, 114, 108, 110, 108, 110, 104, 102, 106, 102, 100, 101, 98, 94, 94, 93, 91, 93, 87, 91, 85, 81, 86, 81, 81, 79, 82, 83, 82, 79, 75, 73, 74, 72, 73, 70, 68, 61, 61, 60, 59, 59, 62, 59, 60, 58, 58, 53, 53, 59, 55, 22, 23, 20, 15, 16, 11, 16, 14, 18, 21, 19, 23, 27, 31, 32, 35, 33, 36, 39, 37, 36, 37, 39, 41, 46, 45, 44, 46, 43, 48, 50, 56, 54, 58, 57, 61, 62, 66, 69, 62, 62, 66, 67, 69, 66, 69, 69, 73, 80, 73, 80, 78, 81, 79, 82, 81, 88, 84, 88, 87, 89, 93, 93, 93, 91, 95, 94, 99, 100, 103, 103, 102, 105, 103, 101, 107, 110, 103, 110, 110, 112, 114, 116, 113, 116, 119, 115, 120, 116, 122, 122, 116, 125, 124, 122, 124, 125, 128, 132, 132, 133, 128, 129, 129, 136, 133, 135, 133, 135, 132, 134, 134, 136, 135, 140, 142, 145, 146, 139, 136, 143, 139, 141, 145, 148, 144, 148, 143, 147, 144, 149, 199, 140, 162, 172, 167, 165, 173, 167, 155, 155, 143, 203, 162, 147, 149, 152, 147, 145, 142, 149, 151, 151, 148, 144, 143, 148, 147, 147, 145, 146, 144, 147, 147, 141, 143, 141, 143, 143, 139, 135, 141, 137, 140, 139, 142, 138, 137, 139, 138, 136, 133, 133, 133, 130, 132, 132, 128, 125, 127, 123, 123, 128, 129, 123, 116, 118, 118, 117, 117, 122, 112, 116, 114, 116, 113, 113, 109, 111, 115, 110, 105, 105, 107, 102, 99, 99, 96, 95, 93, 92, 90, 93, 93, 90, 88, 86, 86, 80, 85, 83, 83, 83, 79, 81, 80, 76, 73, 72, 75, 74, 70, 63, 60, 66, 63, 62, 63, 62, 62, 61, 56, 58, 55, 56, 51, 21, 23, 21, 19, 23, 15, 15, 15, 20, 19, 20, 26, 28, 30, 34, 34, 33, 34, 38, 40, 39, 41, 38, 44, 46, 45, 47, 48, 47, 50, 49, 56, 57, 60, 57, 61, 63, 65, 74, 65, 63, 63, 65, 72, 68, 64, 71, 73, 81, 76, 79, 79, 80, 79, 83, 83, 88, 83, 88, 87, 91, 94, 91, 93, 92, 94, 98, 96, 100, 103, 105, 104, 106, 108, 105, 110, 110, 106, 111, 112, 113, 118, 115, 115, 116, 118, 119, 122, 119, 123, 125, 118, 122, 121, 125, 121, 127, 127, 132, 135, 135, 132, 131, 131, 136, 136, 133, 135, 134, 132, 135, 134, 132, 137, 139, 139, 148, 146, 144, 139, 140, 141, 138, 143, 148, 146, 146, 144, 147, 141, 167, 229, 156, 138, 151, 174, 180, 182, 161, 134, 116, 137, 193, 178, 145, 145, 152, 150, 148, 149, 151, 151, 151, 154, 140, 142, 141, 144, 141, 144, 143, 146, 148, 147, 143, 145, 142, 142, 143, 142, 143, 139, 139, 140, 139, 138, 138, 134, 140, 135, 136, 135, 133, 136, 135, 131, 132, 132, 130, 126, 128, 123, 126, 127, 127, 120, 122, 121, 115, 117, 122, 117, 119, 116, 117, 115, 113, 110, 109, 113, 109, 108, 105, 106, 103, 99, 102, 97, 99, 92, 89, 91, 95, 96, 90, 90, 86, 85, 81, 85, 81, 81, 82, 82, 82, 84, 75, 77, 70, 76, 74, 70, 65, 60, 65, 67, 63, 63, 64, 62, 59, 57, 62, 54, 54, 54, 24, 24, 24, 23, 23, 20, 17, 15, 18, 16, 18, 26, 26, 29, 34, 32, 38, 36, 37, 40, 42, 44, 41, 46, 45, 46, 48, 50, 51, 52, 52, 54, 57, 61, 56, 58, 65, 65, 74, 66, 60, 65, 68, 69, 72, 67, 69, 69, 81, 76, 74, 77, 78, 81, 85, 82, 89, 85, 90, 89, 93, 93, 91, 90, 93, 91, 95, 100, 100, 102, 106, 103, 110, 115, 112, 113, 108, 111, 111, 116, 113, 108, 109, 113, 115, 118, 121, 119, 122, 127, 124, 122, 126, 122, 127, 122, 127, 131, 131, 133, 133, 131, 129, 135, 138, 136, 134, 138, 132, 134, 136, 136, 133, 136, 139, 142, 140, 143, 144, 147, 142, 145, 141, 146, 146, 146, 141, 141, 145, 143, 168, 183, 196, 180, 145, 153, 156, 146, 129, 113, 120, 119, 103, 149, 146, 149, 150, 146, 149, 147, 147, 147, 146, 147, 142, 143, 139, 145, 142, 143, 143, 144, 147, 148, 146, 142, 144, 143, 143, 146, 145, 141, 142, 139, 142, 137, 137, 129, 139, 137, 136, 133, 135, 135, 135, 134, 132, 133, 131, 132, 131, 126, 124, 126, 126, 121, 126, 124, 116, 118, 120, 124, 121, 119, 119, 118, 115, 112, 110, 109, 105, 107, 102, 106, 106, 100, 103, 101, 99, 92, 92, 92, 90, 98, 92, 88, 86, 87, 83, 87, 82, 81, 82, 84, 81, 82, 77, 76, 72, 74, 70, 68, 65, 64, 61, 67, 64, 62, 64, 61, 60, 60, 62, 54, 53, 54, 24, 25, 25, 25, 22, 25, 22, 12, 15, 18, 18, 25, 25, 29, 35, 31, 36, 34, 38, 43, 45, 45, 45, 46, 41, 46, 48, 50, 51, 51, 47, 57, 61, 56, 58, 56, 65, 61, 67, 67, 59, 67, 70, 69, 71, 68, 67, 71, 77, 75, 73, 81, 81, 81, 83, 87, 91, 86, 91, 90, 93, 94, 96, 91, 93, 87, 90, 101, 103, 102, 102, 104, 113, 111, 114, 114, 103, 114, 113, 111, 111, 105, 108, 116, 117, 115, 117, 118, 123, 124, 125, 123, 123, 122, 124, 126, 128, 133, 130, 131, 130, 130, 129, 139, 135, 131, 137, 139, 134, 130, 135, 136, 136, 135, 139, 142, 140, 144, 139, 147, 144, 145, 143, 145, 142, 144, 143, 140, 142, 148, 148, 153, 137, 192, 128, 125, 120, 109, 98, 91, 85, 89, 98, 131, 149, 154, 150, 145, 151, 146, 145, 145, 151, 146, 145, 140, 141, 145, 146, 146, 145, 143, 143, 148, 144, 144, 139, 141, 139, 149, 144, 144, 139, 141, 144, 138, 141, 128, 138, 134, 134, 133, 134, 132, 131, 137, 134, 131, 130, 137, 132, 127, 126, 128, 126, 122, 118, 115, 118, 124, 121, 126, 122, 122, 119, 119, 113, 110, 111, 107, 107, 103, 98, 103, 107, 100, 103, 102, 95, 93, 93, 93, 91, 99, 91, 88, 84, 83, 85, 85, 85, 81, 82, 85, 79, 80, 81, 75, 73, 70, 67, 67, 70, 66, 64, 67, 65, 62, 65, 58, 58, 59, 58, 55, 54, 55, 23, 27, 23, 22, 25, 28, 28, 17, 17, 24, 22, 25, 24, 27, 34, 31, 33, 33, 35, 39, 39, 38, 42, 42, 40, 48, 49, 51, 50, 51, 53, 56, 60, 54, 60, 59, 62, 58, 62, 67, 61, 65, 67, 68, 67, 69, 72, 73, 76, 76, 78, 84, 85, 78, 83, 89, 88, 85, 88, 88, 89, 95, 93, 90, 91, 88, 98, 99, 103, 103, 102, 100, 107, 107, 107, 109, 107, 112, 117, 113, 113, 111, 113, 120, 120, 119, 125, 121, 121, 120, 122, 132, 122, 126, 121, 125, 128, 129, 132, 132, 125, 130, 126, 129, 130, 134, 139, 137, 137, 132, 134, 132, 137, 142, 142, 140, 139, 141, 141, 145, 139, 144, 141, 141, 150, 148, 142, 141, 138, 143, 146, 152, 68, 157, 127, 129, 128, 110, 92, 91, 69, 87, 146, 146, 149, 150, 152, 148, 152, 149, 152, 147, 147, 146, 141, 139, 143, 139, 144, 150, 148, 146, 142, 147, 140, 143, 142, 142, 140, 146, 138, 142, 137, 141, 144, 139, 138, 132, 135, 129, 134, 132, 131, 134, 131, 134, 134, 131, 135, 130, 128, 129, 129, 126, 128, 127, 121, 117, 119, 121, 116, 120, 121, 120, 118
[truncated: 1,954,599 more chars]
