# Supplementary material for: Analysis of DES Plaintext Recovery Based on BP Neural Network
Source: Hindawi journal article supplement (doi:10.1155/2019/9580862), 2019-11-11
Supplement: f1 [file 9580862.f1.zip › 9580862.f1/plain/plain4]

[36, 38, 37, 35, 34, 34, 34, 36, 38, 38, 38, 38, 38, 38, 38, 38, 38, 36, 37, 38, 38, 36, 37, 37, 36, 36, 39, 43, 54, 66, 66, 55, 52, 53, 48, 62, 60, 62, 60, 51, 45, 50, 50, 50, 52, 52, 47, 47, 47, 45, 55, 61, 49, 56, 58, 56, 62, 65, 53, 48, 57, 51, 51, 75, 64, 69, 65, 63, 58, 57, 53, 61, 60, 44, 46, 68, 53, 52, 51, 49, 48, 47, 46, 45, 45, 42, 36, 35, 37, 40, 41, 42, 43, 45, 47, 48, 50, 50, 49, 48, 46, 45, 44, 45, 51, 54, 53, 53, 51, 45, 52, 45, 59, 85, 89, 73, 63, 79, 103, 109, 98, 88, 75, 93, 98, 101, 89, 115, 113, 124, 122, 109, 90, 85, 90, 95, 100, 99, 97, 101, 107, 108, 98, 83, 68, 31, 35, 35, 35, 38, 38, 42, 44, 46, 47, 48, 47, 48, 53, 49, 50, 53, 49, 49, 49, 42, 40, 38, 38, 44, 42, 39, 44, 43, 40, 39, 39, 41, 43, 39, 38, 40, 38, 36, 40, 41, 40, 51, 44, 41, 53, 47, 53, 67, 70, 78, 93, 80, 60, 94, 110, 89, 106, 106, 108, 104, 81, 66, 61, 49, 43, 40, 51, 73, 89, 89, 62, 50, 50, 53, 61, 62, 56, 61, 66, 68, 66, 61, 58, 69, 72, 57, 56, 70, 75, 62, 57, 59, 58, 50, 41, 38, 40, 42, 40, 38, 38, 38, 36, 34, 33, 34, 35, 36, 36, 36, 35, 37, 36, 35, 34, 34, 35, 37, 39, 39, 39, 39, 39, 39, 37, 35, 36, 36, 37, 39, 40, 38, 39, 37, 36, 36, 40, 44, 54, 65, 65, 58, 58, 60, 56, 55, 46, 54, 61, 46, 51, 60, 55, 52, 52, 51, 46, 45, 42, 40, 53, 56, 50, 62, 59, 50, 58, 62, 48, 48, 60, 46, 44, 62, 56, 61, 55, 53, 56, 52, 44, 52, 57, 47, 45, 58, 54, 52, 50, 48, 46, 46, 46, 43, 39, 38, 41, 42, 39, 38, 39, 41, 43, 45, 48, 49, 50, 51, 49, 48, 46, 45, 45, 39, 45, 50, 51, 52, 50, 44, 58, 41, 49, 84, 107, 101, 86, 88, 119, 119, 109, 104, 111, 122, 120, 120, 103, 123, 126, 146, 149, 123, 93, 102, 127, 134, 132, 132, 124, 124, 132, 126, 118, 123, 108, 55, 44, 38, 39, 40, 38, 42, 43, 45, 47, 48, 48, 48, 50, 52, 54, 51, 48, 53, 53, 43, 42, 48, 38, 46, 37, 42, 48, 43, 40, 42, 44, 45, 43, 40, 40, 42, 41, 39, 42, 44, 42, 44, 43, 45, 49, 41, 55, 60, 62, 80, 110, 102, 73, 76, 84, 75, 92, 89, 99, 102, 89, 81, 83, 40, 43, 45, 52, 67, 79, 82, 72, 58, 62, 65, 63, 55, 49, 61, 69, 73, 66, 51, 36, 41, 50, 45, 41, 45, 52, 51, 45, 39, 34, 35, 37, 39, 38, 36, 37, 36, 34, 32, 32, 32, 35, 35, 36, 37, 36, 36, 36, 35, 35, 35, 34, 35, 36, 38, 39, 39, 39, 39, 39, 39, 36, 33, 34, 35, 36, 39, 40, 42, 41, 39, 37, 38, 42, 46, 52, 60, 61, 57, 60, 64, 61, 55, 46, 55, 64, 47, 53, 62, 56, 51, 51, 50, 48, 48, 43, 37, 48, 49, 48, 59, 53, 44, 51, 56, 43, 44, 57, 43, 37, 49, 47, 55, 51, 49, 59, 58, 53, 53, 60, 66, 57, 42, 55, 53, 50, 48, 48, 49, 49, 43, 37, 37, 43, 45, 39, 37, 40, 41, 44, 46, 48, 49, 50, 49, 48, 47, 45, 44, 44, 37, 43, 48, 50, 52, 51, 45, 52, 44, 44, 65, 93, 95, 78, 87, 98, 91, 91, 88, 107, 110, 98, 99, 81, 94, 97, 115, 115, 97, 85, 98, 125, 134, 126, 125, 114, 111, 120, 114, 113, 132, 119, 58, 42, 38, 41, 41, 37, 41, 42, 44, 46, 48, 48, 47, 44, 57, 56, 48, 50, 54, 51, 46, 39, 55, 28, 48, 34, 41, 45, 42, 41, 44, 46, 47, 45, 43, 42, 43, 40, 37, 38, 51, 50, 44, 44, 49, 47, 42, 57, 65, 71, 80, 96, 109, 112, 97, 85, 74, 83, 68, 77, 80, 72, 70, 80, 56, 66, 68, 64, 64, 69, 71, 60, 56, 71, 75, 62, 47, 40, 48, 49, 49, 44, 37, 30, 31, 37, 43, 48, 55, 57, 51, 43, 37, 33, 33, 35, 36, 35, 35, 38, 39, 36, 34, 34, 36, 39, 39, 38, 39, 39, 38, 38, 35, 35, 35, 35, 36, 37, 38, 38, 38, 38, 38, 38, 38, 36, 36, 36, 37, 38, 40, 41, 43, 43, 40, 38, 40, 43, 47, 48, 52, 52, 51, 55, 58, 56, 58, 53, 58, 61, 49, 49, 56, 52, 48, 48, 51, 51, 53, 48, 39, 43, 45, 48, 52, 49, 43, 45, 50, 44, 42, 53, 47, 45, 48, 48, 57, 57, 52, 63, 62, 65, 57, 63, 84, 71, 30, 52, 51, 48, 47, 48, 51, 52, 46, 40, 39, 44, 46, 41, 39, 42, 43, 45, 46, 48, 49, 48, 48, 47, 45, 44, 42, 42, 41, 46, 50, 50, 53, 53, 50, 45, 47, 49, 55, 61, 59, 55, 90, 89, 79, 81, 61, 72, 70, 63, 73, 69, 80, 79, 85, 81, 85, 96, 90, 92, 103, 109, 106, 91, 84, 91, 91, 92, 104, 104, 45, 33, 34, 39, 41, 38, 41, 42, 44, 45, 47, 48, 47, 44, 56, 54, 47, 51, 51, 46, 47, 33, 51, 19, 48, 37, 38, 38, 43, 46, 46, 47, 48, 47, 45, 43, 42, 43, 44, 46, 67, 66, 53, 48, 54, 53, 55, 67, 89, 106, 94, 74, 93, 129, 129, 99, 90, 107, 93, 96, 91, 77, 72, 81, 105, 108, 100, 84, 71, 63, 56, 40, 42, 53, 46, 34, 41, 41, 33, 30, 29, 32, 37, 41, 37, 35, 39, 45, 52, 52, 41, 36, 42, 47, 41, 31, 32, 40, 40, 43, 44, 40, 36, 36, 40, 40, 40, 39, 39, 39, 39, 39, 35, 35, 35, 36, 37, 38, 39, 38, 38, 38, 38, 38, 38, 40, 41, 41, 41, 41, 42, 43, 43, 42, 39, 38, 41, 44, 46, 41, 40, 39, 39, 42, 44, 42, 39, 42, 44, 44, 51, 52, 57, 49, 44, 46, 50, 52, 54, 53, 44, 40, 46, 51, 47, 51, 49, 42, 48, 51, 46, 55, 62, 64, 58, 55, 61, 64, 54, 59, 50, 59, 55, 59, 78, 65, 26, 49, 46, 45, 44, 45, 47, 49, 49, 44, 42, 44, 46, 45, 45, 45, 46, 47, 47, 48, 48, 48, 47, 46, 45, 44, 43, 42, 42, 45, 45, 44, 47, 50, 48, 55, 47, 56, 61, 46, 47, 73, 121, 142, 138, 124, 87, 81, 72, 69, 88, 100, 123, 133, 137, 142, 144, 133, 102, 89, 106, 130, 131, 112, 86, 73, 73, 76, 76, 103, 47, 35, 35, 38, 39, 40, 42, 42, 43, 45, 47, 48, 49, 52, 48, 49, 49, 47, 48, 55, 55, 39, 41, 28, 46, 51, 39, 37, 52, 60, 58, 57, 59, 47, 42, 40, 46, 60, 79, 92, 106, 88, 59, 54, 66, 69, 67, 107, 141, 163, 142, 101, 92, 111, 113, 85, 98, 154, 164, 165, 162, 151, 129, 125, 46, 50, 56, 63, 67, 59, 47, 48, 77, 100, 81, 53, 48, 44, 34, 40, 47, 51, 46, 39, 35, 40, 44, 31, 18, 18, 25, 25, 29, 34, 35, 34, 35, 40, 38, 39, 39, 35, 30, 29, 31, 36, 35, 34, 33, 33, 34, 34, 36, 36, 36, 37, 38, 39, 39, 40, 40, 40, 40, 40, 40, 41, 41, 41, 40, 40, 40, 41, 40, 38, 37, 39, 41, 44, 44, 38, 36, 35, 40, 48, 53, 52, 74, 71, 59, 45, 52, 46, 52, 51, 45, 46, 50, 50, 51, 51, 45, 37, 43, 52, 44, 55, 53, 40, 48, 55, 50, 57, 70, 71, 63, 61, 62, 69, 58, 59, 50, 57, 61, 60, 58, 50, 40, 51, 49, 46, 43, 43, 43, 43, 44, 41, 40, 41, 43, 45, 47, 47, 47, 47, 47, 47, 47, 49, 49, 48, 47, 46, 44, 43, 39, 40, 37, 34, 37, 41, 41, 43, 34, 34, 37, 38, 52, 78, 125, 164, 164, 160, 166, 171, 158, 148, 153, 150, 153, 158, 157, 165, 157, 146, 153, 155, 144, 137, 144, 149, 130, 93, 84, 106, 128, 122, 60, 43, 39, 39, 41, 45, 44, 44, 44, 45, 46, 47, 49, 51, 46, 59, 55, 35, 62, 98, 82, 70, 44, 61, 47, 65, 51, 58, 81, 94, 95, 98, 105, 94, 82, 64, 50, 53, 67, 77, 92, 78, 63, 66, 89, 115, 126, 137, 154, 158, 155, 154, 136, 115, 131, 149, 150, 146, 116, 135, 149, 124, 88, 71, 57, 52, 47, 48, 54, 52, 43, 35, 48, 59, 49, 42, 42, 41, 47, 49, 53, 59, 61, 60, 63, 68, 71, 71, 70, 63, 50, 44, 40, 34, 37, 41, 39, 33, 42, 43, 42, 39, 36, 35, 35, 35, 34, 32, 31, 31, 32, 34, 38, 38, 37, 37, 38, 39, 40, 41, 41, 41, 41, 41, 41, 39, 38, 37, 37, 37, 37, 38, 39, 37, 38, 41, 45, 46, 45, 48, 44, 44, 53, 64, 70, 71, 52, 49, 49, 48, 49, 51, 60, 59, 51, 51, 54, 52, 50, 47, 43, 38, 38, 48, 44, 55, 54, 44, 50, 53, 49, 57, 63, 66, 64, 68, 65, 76, 68, 69, 68, 70, 71, 67, 63, 60, 59, 55, 53, 51, 50, 48, 47, 46, 43, 41, 40, 42, 43, 42, 42, 44, 45, 45, 45, 46, 46, 48, 49, 48, 47, 45, 44, 43, 45, 47, 46, 43, 46, 50, 49, 44, 53, 55, 51, 52, 54, 55, 87, 111, 109, 125, 169, 174, 163, 153, 167, 171, 165, 161, 151, 160, 155, 140, 135, 132, 138, 160, 151, 164, 170, 130, 99, 104, 123, 104, 41, 29, 33, 40, 46, 53, 45, 44, 44, 44, 45, 46, 47, 45, 49, 62, 55, 36, 69, 105, 87, 76, 51, 73, 50, 62, 37, 35, 53, 64, 67, 72, 80, 73, 67, 55, 42, 44, 54, 59, 50, 66, 78, 53, 39, 69, 95, 109, 116, 110, 117, 144, 145, 114, 85, 93, 97, 140, 142, 140, 141, 122, 92, 80, 78, 82, 79, 70, 62, 53, 46, 40, 42, 59, 79, 100, 93, 73, 73, 75, 79, 85, 87, 85, 86, 87, 81, 71, 65, 60, 50, 42, 41, 41, 39, 37, 39, 42, 42, 43, 42, 41, 40, 40, 39, 41, 39, 38, 37, 37, 38, 39, 39, 39, 38, 38, 38, 39, 40, 41, 41, 41, 41, 41, 41, 39, 37, 36, 36, 37, 38, 39, 39, 39, 40, 45, 50, 50, 48, 44, 36, 34, 42, 51, 55, 55, 61, 59, 70, 79, 67, 69, 75, 66, 58, 57, 59, 56, 53, 46, 44, 44, 37, 45, 45, 54, 57, 53, 57, 53, 51, 58, 52, 52, 56, 65, 56, 67, 61, 62, 62, 64, 55, 52, 64, 69, 58, 53, 54, 53, 53, 52, 51, 51, 50, 46, 46, 48, 46, 40, 38, 41, 42, 43, 44, 46, 46, 47, 47, 46, 45, 44, 42, 42, 44, 48, 48, 47, 50, 53, 50, 45, 45, 52, 53, 48, 56, 77, 106, 118, 119, 128, 153, 131, 119, 108, 118, 117, 104, 106, 106, 123, 126, 109, 94, 93, 99, 101, 97, 112, 125, 113, 108, 123, 142, 114, 48, 35, 40, 44, 44, 45, 47, 45, 44, 44, 44, 45, 47, 50, 49, 50, 51, 53, 58, 67, 63, 52, 48, 60, 51, 50, 41, 44, 51, 53, 53, 55, 60, 52, 53, 55, 52, 55, 59, 57, 48, 60, 89, 89, 86, 105, 102, 114, 133, 139, 138, 145, 151, 139, 113, 123, 111, 146, 146, 143, 148, 137, 121, 120, 77, 79, 73, 64, 58, 58, 57, 44, 40, 52, 80, 105, 103, 89, 88, 91, 91, 88, 86, 88, 87, 87, 84, 64, 51, 54, 49, 42, 41, 44, 40, 39, 44, 43, 41, 40, 38, 41, 43, 41, 37, 39, 38, 38, 40, 42, 42, 40, 38, 39, 38, 37, 37, 38, 39, 41, 41, 42, 41, 40, 39, 39, 38, 40, 42, 41, 40, 41, 42, 42, 41, 43, 46, 47, 47, 48, 36, 38, 43, 49, 56, 53, 65, 63, 74, 81, 71, 71, 66, 58, 55, 55, 57, 55, 51, 49, 49, 48, 37, 45, 47, 49, 56, 60, 63, 54, 52, 57, 50, 48, 54, 57, 49, 56, 54, 59, 52, 47, 41, 45, 54, 67, 60, 58, 60, 59, 53, 48, 48, 49, 47, 46, 45, 45, 45, 43, 42, 42, 43, 43, 45, 47, 48, 48, 48, 48, 50, 48, 45, 44, 43, 47, 50, 51, 52, 52, 49, 46, 48, 54, 66, 90, 106, 125, 127, 123, 132, 132, 149, 130, 129, 124, 128, 125, 115, 116, 120, 131, 136, 130, 118, 115, 106, 81, 76, 89, 93, 118, 126, 132, 119, 86, 46, 40, 42, 46, 47, 41, 46, 45, 45, 44, 45, 47, 49, 54, 52, 49, 53, 56, 66, 79, 77, 63, 66, 67, 60, 51, 50, 53, 53, 46, 48, 53, 61, 58, 59, 53, 59, 71, 69, 74, 64, 62, 81, 109, 132, 138, 132, 135, 150, 155, 156, 151, 157, 144, 131, 150, 145, 157, 156, 150, 152, 152, 142, 143, 74, 69, 61, 56, 55, 59, 61, 43, 42, 41, 52, 70, 77, 77, 79, 80, 76, 69, 71, 79, 79, 80, 87, 73, 60, 66, 57, 47, 42, 45, 43, 42, 48, 38, 41, 39, 37, 40, 44, 43, 37, 42, 40, 40, 41, 43, 42, 39, 38, 40, 40, 38, 38, 39, 41, 42, 41, 41, 39, 38, 37, 38, 39, 41, 46, 45, 41, 42, 44, 43, 40, 39, 40, 42, 45, 52, 41, 49, 53, 56, 68, 61, 57, 55, 60, 59, 61, 62, 51, 49, 50, 51, 52, 51, 48, 50, 52, 49, 40, 48, 50, 45, 51, 60, 63, 54, 51, 55, 53, 51, 56, 52, 50, 54, 52, 58, 44, 43, 46, 53, 51, 69, 69, 70, 71, 66, 55, 45, 43, 44, 43, 41, 39, 41, 44, 47, 47, 44, 44, 44, 46, 48, 50, 51, 50, 51, 56, 53, 48, 48, 43, 45, 50, 53, 53, 50, 48, 50, 59, 58, 71, 118, 131, 131, 109, 98, 122, 129, 150, 147, 153, 151, 148, 148, 150, 150, 151, 151, 156, 164, 161, 156, 139, 106, 96, 107, 103, 143, 143, 133, 94, 54, 37, 36, 38, 43, 50, 44, 45, 44, 44, 45, 46, 49, 50, 51, 51, 52, 57, 46, 75, 108, 98, 81, 77, 75, 64, 55, 53, 46, 47, 46, 47, 56, 67, 70, 70, 51, 55, 71, 68, 83, 71, 63, 64, 99, 132, 127, 132, 122, 127, 124, 133, 129, 142, 127, 123, 144, 155, 147, 146, 129, 129, 134, 127, 125, 82, 84, 83, 76, 64, 51, 45, 42, 50, 45, 43, 57, 65, 63, 62, 54, 52, 59, 69, 76, 76, 76, 85, 89, 81, 78, 67, 47, 43, 49, 47, 42, 47, 40, 41, 42, 41, 40, 41, 43, 44, 50, 50, 48, 44, 40, 38, 39, 41, 43, 43, 42, 42, 44, 44, 42, 40, 37, 34, 35, 38, 41, 40, 39, 43, 43, 40, 41, 42, 42, 40, 40, 41, 43, 45, 46, 43, 53, 53, 54, 62, 53, 51, 49, 52, 50, 54, 60, 53, 54, 52, 52, 53, 51, 48, 48, 51, 51, 45, 54, 54, 47, 47, 53, 59, 53, 52, 55, 52, 51, 54, 56, 56, 60, 52, 50, 39, 62, 73, 76, 77, 92, 77, 79, 76, 68, 58, 48, 43, 45, 47, 37, 35, 43, 49, 47, 43, 43, 43, 44, 46, 48, 50, 52, 50, 52, 56, 54, 48, 48, 45, 45, 46, 48, 49, 49, 49, 53, 58, 52, 51, 73, 68, 67, 67, 60, 95, 118, 132, 124, 122, 114, 108, 108, 115, 125, 132, 135, 142, 149, 149, 146, 138, 120, 111, 123, 122, 144, 135, 134, 117, 75, 37, 30, 38, 41, 44, 47, 45, 44, 43, 43, 46, 49, 49, 45, 48, 45, 56, 39, 59, 90, 77, 59, 54, 55, 54, 50, 50, 39, 44, 63, 56, 59, 68, 71, 74, 55, 50, 63, 68, 78, 74, 68, 68, 86, 103, 95, 88, 77, 91, 89, 96, 90, 111, 117, 124, 131, 137, 115, 108, 81, 93, 91, 92, 92, 46, 47, 46, 44, 41, 36, 34, 41, 41, 50, 50, 42, 63, 90, 91, 76, 69, 74, 73, 62, 57, 51, 48, 54, 50, 52, 53, 47, 47, 58, 55, 49, 52, 48, 41, 44, 45, 37, 29, 28, 32, 20, 28, 34, 34, 32, 34, 37, 36, 37, 37, 36, 37, 39, 40, 39, 41, 39, 37, 40, 46, 51, 46, 40, 41, 41, 39, 39, 40, 41, 40, 41, 43, 44, 45, 50, 54, 63, 58, 57, 57, 44, 52, 53, 56, 52, 56, 63, 55, 49, 47, 48, 53, 55, 53, 50, 47, 50, 46, 56, 56, 47, 49, 57, 64, 57, 54, 54, 50, 52, 53, 59, 59, 66, 56, 49, 48, 78, 105, 124, 127, 125, 91, 61, 54, 48, 46, 48, 51, 51, 45, 37, 37, 43, 46, 41, 39, 41, 43, 46, 48, 50, 51, 53, 52, 53, 57, 54, 48, 48, 50, 48, 47, 46, 48, 51, 53, 46, 55, 55, 51, 52, 29, 31, 76, 56, 67, 75, 82, 86, 94, 99, 117, 117, 101, 106, 134, 148, 143, 135, 123, 115, 113, 113, 107, 107, 94, 93, 84, 103, 112, 102, 48, 32, 43, 39, 37, 45, 45, 44, 42, 42, 45, 49, 51, 54, 59, 48, 59, 41, 51, 67, 57, 43, 47, 52, 60, 63, 52, 59, 77, 94, 95, 88, 93, 103, 96, 68, 67, 103, 130, 126, 141, 130, 119, 104, 102, 109, 106, 144, 151, 143, 159, 147, 147, 148, 155, 141, 143, 128, 132, 108, 136, 134, 142, 145, 48, 41, 33, 31, 34, 40, 43, 42, 72, 67, 47, 48, 44, 35, 39, 43, 61, 82, 86, 75, 61, 52, 61, 72, 65, 59, 51, 38, 34, 43, 44, 40, 44, 42, 42, 49, 56, 55, 47, 43, 47, 55, 61, 63, 59, 51, 45, 43, 44, 45, 44, 43, 43, 45, 44, 42, 48, 52, 54, 58, 64, 66, 57, 45, 43, 42, 40, 38, 39, 41, 41, 43, 44, 44, 43, 41, 49, 53, 50, 51, 48, 33, 44, 50, 55, 48, 49, 54, 45, 44, 43, 44, 50, 53, 54, 49, 43, 46, 42, 53, 53, 46, 47, 51, 56, 51, 49, 50, 49, 53, 54, 59, 56, 63, 58, 57, 85, 85, 82, 72, 55, 79, 94, 85, 67, 49, 43, 45, 48, 45, 39, 46, 49, 45, 40, 38, 40, 43, 47, 50, 52, 53, 53, 54, 52, 53, 56, 53, 49, 49, 54, 53, 51, 51, 52, 55, 58, 53, 53, 51, 48, 58, 55, 68, 51, 89, 138, 153, 160, 142, 138, 131, 143, 148, 148, 153, 161, 157, 145, 136, 130, 128, 132, 141, 150, 147, 133, 125, 117, 131, 136, 104, 52, 35, 45, 42, 40, 46, 46, 44, 43, 43, 46, 50, 52, 49, 52, 42, 46, 46, 56, 70, 121, 125, 151, 149, 133, 127, 81, 114, 146, 141, 158, 147, 149, 152, 134, 103, 94, 127, 153, 129, 139, 148, 161, 142, 128, 141, 138, 151, 146, 129, 142, 123, 104, 101, 148, 158, 161, 140, 120, 129, 156, 144, 153, 155, 44, 40, 37, 40, 45, 49, 50, 49, 55, 59, 51, 41, 51, 66, 71, 74, 78, 77, 67, 53, 49, 56, 72, 77, 69, 66, 56, 42, 35, 41, 46, 45, 50, 47, 50, 50, 53, 53, 46, 41, 43, 41, 42, 44, 46, 47, 45, 44, 47, 48, 48, 46, 45, 46, 53, 64, 68, 70, 72, 77, 84, 77, 59, 46, 43, 42, 40, 39, 39, 41, 42, 44, 44, 43, 42, 39, 46, 46, 49, 56, 52, 40, 41, 49, 53, 45, 47, 53, 44, 48, 46, 46, 47, 48, 48, 47, 45, 46, 40, 51, 53, 48, 47, 48, 53, 53, 55, 61, 65, 52, 53, 58, 53, 56, 53, 58, 64, 56, 72, 106, 109, 105, 84, 91, 71, 51, 45, 46, 45, 42, 42, 51, 53, 46, 40, 40, 42, 44, 47, 51, 53, 54, 55, 54, 52, 52, 55, 53, 49, 49, 54, 54, 53, 53, 54, 56, 57, 56, 55, 52, 46, 51, 47, 68, 98, 131, 152, 148, 171, 156, 162, 163, 162, 159, 160, 165, 163, 156, 149, 146, 149, 153, 153, 154, 146, 127, 106, 77, 63, 72, 79, 73, 42, 34, 43, 44, 48, 50, 47, 45, 44, 45, 48, 52, 54, 57, 57, 54, 55, 79, 97, 52, 64, 91, 154, 160, 137, 138, 82, 108, 142, 138, 151, 151, 151, 154, 150, 137, 119, 133, 149, 126, 142, 149, 164, 145, 136, 156, 151, 156, 154, 137, 142, 121, 106, 98, 140, 153, 152, 159, 130, 156, 164, 159, 162, 163, 73, 73, 76, 83, 89, 90, 91, 101, 96, 79, 65, 71, 89, 97, 90, 86, 76, 61, 49, 45, 45, 51, 65, 61, 53, 60, 56, 50, 42, 47, 54, 56, 59, 55, 52, 48, 52, 61, 65, 68, 75, 68, 59, 50, 47, 46, 46, 44, 45, 47, 49, 47, 45, 44, 51, 62, 57, 54, 53, 59, 66, 65, 53, 42, 41, 42, 40, 40, 40, 41, 42, 43, 44, 43, 42, 44, 49, 45, 51, 58, 52, 48, 41, 48, 49, 42, 49, 57, 47, 51, 52, 51, 48, 47, 48, 50, 50, 48, 40, 50, 55, 51, 50, 48, 52, 54, 57, 64, 72, 46, 51, 55, 52, 50, 46, 52, 47, 60, 78, 96, 93, 88, 62, 67, 54, 44, 46, 49, 46, 43, 47, 46, 44, 43, 41, 41, 42, 44, 46, 49, 51, 53, 53, 53, 51, 51, 54, 52, 49, 50, 51, 51, 52, 52, 52, 52, 52, 52, 54, 53, 49, 56, 55, 81, 151, 161, 150, 138, 169, 152, 158, 163, 159, 150, 149, 162, 169, 169, 164, 161, 161, 163, 160, 157, 153, 132, 112, 63, 38, 42, 51, 51, 37, 37, 41, 46, 53, 48, 45, 45, 45, 46, 49, 52, 54, 54, 52, 54, 53, 87, 111, 47, 53, 75, 139, 138, 116, 129, 84, 82, 106, 128, 124, 137, 134, 129, 131, 127, 116, 129, 145, 135, 145, 133, 134, 120, 122, 149, 148, 149, 153, 147, 154, 137, 121, 99, 145, 133, 106, 128, 113, 161, 160, 157, 156, 155, 96, 97, 101, 108, 113, 111, 108, 114, 113, 93, 79, 87, 98, 96, 88, 81, 70, 60, 61, 68, 70, 72, 83, 79, 70, 75, 72, 67, 59, 66, 74, 74, 74, 68, 62, 54, 55, 65, 70, 75, 84, 81, 68, 55, 47, 44, 43, 43, 44, 48, 52, 51, 49, 47, 50, 53, 43, 35, 35, 39, 44, 47, 43, 38, 38, 39, 39, 41, 39, 40, 41, 43, 44, 44, 44, 47, 50, 45, 49, 50, 41, 49, 40, 46, 48, 42, 52, 60, 47, 52, 56, 56, 51, 47, 51, 55, 53, 50, 40, 50, 54, 51, 49, 46, 48, 47, 47, 52, 59, 38, 50, 49, 51, 47, 43, 51, 72, 89, 87, 69, 52, 60, 45, 48, 41, 40, 47, 51, 46, 43, 48, 41, 37, 39, 41, 40, 41, 44, 45, 47, 49, 51, 51, 52, 49, 49, 52, 51, 49, 50, 48, 49, 49, 49, 49, 49, 49, 49, 50, 48, 51, 75, 91, 122, 151, 144, 119, 116, 139, 124, 124, 126, 119, 114, 128, 153, 161, 156, 152, 149, 144, 146, 148, 145, 150, 133, 126, 73, 46, 40, 42, 46, 39, 41, 41, 45, 52, 43, 42, 44, 45, 47, 49, 51, 52, 52, 48, 49, 54, 76, 100, 46, 58, 64, 111, 100, 88, 109, 78, 55, 68, 119, 104, 119, 114, 108, 107, 96, 97, 117, 131, 132, 135, 121, 121, 118, 126, 149, 153, 138, 145, 151, 160, 151, 134, 81, 103, 106, 91, 114, 110, 154, 158, 158, 154, 153, 88, 90, 96, 105, 108, 102, 95, 89, 92, 97, 94, 83, 82, 87, 88, 84, 83, 87, 97, 106, 108, 105, 112, 117, 104, 96, 87, 76, 69, 80, 89, 83, 79, 73, 69, 58, 56, 58, 52, 47, 51, 55, 51, 45, 41, 39, 38, 40, 45, 51, 57, 58, 55, 53, 54, 52, 43, 38, 40, 42, 40, 39, 36, 35, 37, 37, 37, 40, 37, 37, 39, 42, 45, 47, 48, 42, 47, 43, 46, 40, 31, 51, 43, 52, 57, 54, 63, 64, 45, 53, 61, 62, 53, 47, 51, 56, 52, 48, 38, 47, 50, 46, 45, 42, 43, 41, 38, 38, 42, 35, 50, 39, 48, 47, 48, 59, 107, 101, 82, 63, 49, 55, 41, 50, 44, 42, 47, 49, 43, 39, 45, 42, 40, 40, 40, 39, 42, 45, 45, 46, 47, 50, 51, 50, 47, 48, 51, 51, 49, 51, 49, 49, 48, 48, 48, 48, 49, 48, 48, 41, 46, 86, 119, 147, 98, 90, 73, 94, 100, 100, 102, 99, 88, 90, 119, 141, 130, 111, 113, 122, 120, 124, 131, 129, 131, 110, 110, 68, 55, 48, 44, 52, 43, 42, 40, 41, 46, 38, 39, 42, 44, 47, 48, 49, 50, 56, 53, 50, 64, 63, 81, 43, 46, 51, 89, 78, 77, 93, 59, 44, 51, 115, 105, 107, 102, 109, 110, 92, 96, 113, 110, 115, 119, 125, 141, 146, 146, 156, 167, 133, 139, 147, 148, 145, 138, 60, 41, 85, 116, 136, 135, 142, 157, 164, 162, 161, 78, 89, 110, 129, 135, 127, 120, 146, 152, 142, 129, 129, 129, 121, 109, 108, 112, 121, 122, 117, 105, 82, 72, 73, 58, 46, 45, 42, 40, 56, 63, 52, 44, 39, 39, 36, 45, 55, 50, 43, 48, 50, 55, 58, 54, 45, 40, 38, 38, 46, 54, 56, 54, 52, 48, 43, 39, 42, 48, 46, 39, 34, 34, 36, 39, 37, 35, 38, 35, 35, 37, 41, 45, 49, 52, 38, 48, 49, 55, 47, 40, 71, 58, 72, 83, 82, 87, 78, 52, 58, 68, 66, 52, 42, 46, 51, 47, 44, 34, 43, 44, 39, 47, 49, 51, 51, 47, 45, 49, 39, 51, 30, 44, 50, 57, 72, 76, 58, 55, 67, 57, 52, 37, 53, 43, 37, 40, 44, 43, 39, 41, 52, 55, 46, 39, 41, 46, 48, 47, 47, 48, 50, 52, 50, 46, 46, 50, 50, 48, 51, 52, 51, 49, 48, 49, 50, 52, 40, 48, 46, 43, 65, 73, 83, 54, 64, 74, 125, 121, 143, 152, 151, 153, 147, 143, 133, 105, 86, 104, 133, 141, 143, 144, 132, 136, 96, 72, 32, 48, 69, 78, 57, 39, 36, 37, 38, 42, 37, 37, 40, 43, 46, 47, 48, 47, 50, 49, 44, 72, 49, 63, 49, 58, 79, 124, 117, 112, 106, 49, 58, 67, 122, 131, 115, 110, 131, 150, 143, 144, 140, 114, 122, 123, 141, 157, 149, 129, 136, 164, 131, 139, 140, 118, 116, 139, 83, 88, 82, 95, 114, 142, 117, 139, 155, 156, 156, 219, 220, 219, 218, 215, 214, 215, 214, 213, 213, 213, 211, 211, 216, 207, 210, 195, 121, 225, 104, 84, 67, 67, 64, 67, 69, 69, 80, 75, 71, 36, 92, 68, 68, 67, 80, 57, 76, 62, 69, 100, 37, 83, 63, 52, 67, 89, 52, 57, 45, 83, 28, 86, 73, 54, 93, 67, 59, 46, 65, 66, 33, 36, 53, 93, 37, 31, 72, 68, 150, 151, 139, 112, 96, 73, 33, 76, 73, 75, 94, 64, 125, 185, 170, 198, 209, 149, 136, 129, 106, 88, 141, 187, 206, 198, 209, 214, 189, 175, 221, 118, 61, 69, 90, 67, 81, 174, 126, 169, 156, 138, 182, 212, 154, 202, 123, 148, 203, 212, 192, 132, 212, 128, 92, 177, 142, 154, 117, 148, 174, 164, 209, 194, 240, 152, 188, 193, 179, 232, 158, 240, 222, 205, 229, 232, 213, 225, 222, 223, 233, 201, 214, 214, 215, 232, 226, 207, 229, 230, 217, 225, 227, 232, 224, 226, 225, 225, 225, 225, 224, 224, 225, 225, 225, 225, 225, 225, 225, 225, 225, 226, 226, 226, 227, 226, 226, 226, 226, 226, 226, 226, 222, 234, 224, 214, 232, 234, 167, 192, 226, 229, 228, 223, 229, 226, 223, 222, 222, 223, 224, 226, 226, 224, 226, 228, 228, 226, 225, 226, 215, 231, 209, 223, 225, 222, 216, 220, 223, 225, 225, 224, 222, 219, 236, 217, 215, 154, 229, 227, 217, 225, 225, 230, 228, 219, 222, 225, 225, 225, 225, 225, 225, 224, 223, 223, 223, 217, 218, 218, 217, 215, 215, 215, 214, 213, 213, 213, 211, 211, 212, 215, 215, 223, 196, 90, 123, 106, 71, 62, 127, 55, 94, 150, 96, 145, 91, 103, 104, 45, 55, 72, 48, 67, 62, 53, 85, 167, 82, 93, 105, 133, 75, 81, 79, 87, 63, 53, 55, 68, 60, 65, 73, 65, 42, 52, 58, 55, 52, 48, 55, 66, 53, 42, 48, 44, 84, 124, 130, 82, 71, 90, 41, 88, 88, 75, 109, 67, 138, 143, 182, 160, 213, 132, 105, 124, 167, 124, 150, 184, 161, 209, 211, 220, 189, 168, 152, 141, 82, 84, 96, 80, 84, 140, 73, 137, 123, 168, 174, 169, 162, 187, 138, 175, 184, 148, 208, 191, 195, 107, 97, 137, 164, 159, 164, 122, 168, 193, 217, 217, 172, 189, 200, 199, 222, 225, 184, 231, 197, 202, 222, 204, 221, 229, 216, 215, 230, 215, 216, 242, 232, 212, 229, 222, 218, 228, 221, 225, 221, 225, 223, 225, 225, 225, 225, 225, 225, 225, 225, 225, 225, 225, 225, 225, 225, 225, 226, 226, 227, 227, 227, 226, 226, 226, 226, 226, 226, 226, 231, 216, 219, 231, 224, 221, 202, 206, 228, 223, 227, 228, 232, 224, 224, 223, 223, 223, 224, 225, 225, 225, 226, 227, 227, 226, 225, 232, 224, 234, 231, 223, 221, 227, 224, 224, 226, 227, 226, 223, 221, 238, 205, 225, 232, 195, 224, 212, 220, 225, 223, 227, 227, 221, 225, 223, 223, 223, 223, 223, 223, 223, 223, 223, 223, 215, 215, 216, 217, 215, 216, 216, 213, 213, 213, 213, 211, 211, 215, 220, 205, 213, 217, 117, 133, 92, 72, 66, 113, 69, 105, 176, 74, 181, 99, 103, 101, 62, 59, 59, 66, 47, 63, 57, 103, 168, 89, 97, 95, 112, 81, 118, 57, 89, 77, 58, 81, 51, 58, 74, 71, 110, 105, 28, 55, 62, 80, 70, 73, 94, 105, 59, 43, 60, 57, 111, 123, 111, 97, 69, 60, 70, 74, 66, 111, 95, 131, 170, 189, 179, 183, 193, 164, 133, 167, 136, 179, 187, 151, 223, 215, 222, 198, 173, 197, 127, 78, 79, 73, 76, 61, 115, 142, 178, 118, 117, 154, 154, 133, 134, 128, 163, 202, 153, 186, 163, 128, 94, 97, 148, 163, 154, 164, 138, 184, 194, 213, 176, 144, 190, 160, 210, 233, 192, 176, 213, 215, 201, 207, 196, 211, 213, 202, 224, 206, 218, 231, 214, 209, 214, 225, 237, 216, 225, 222, 224, 218, 222, 222, 224, 224, 225, 225, 225, 225, 225, 225, 225, 225, 225, 225, 225, 225, 226, 226, 227, 227, 227, 227, 227, 227, 227, 227, 227, 227, 227, 224, 230, 230, 225, 225, 230, 197, 209, 228, 222, 226, 229, 233, 223, 224, 224, 224, 224, 224, 224, 224, 225, 226, 226, 226, 226, 225, 227, 225, 230, 213, 203, 219, 223, 223, 226, 227, 227, 225, 223, 221, 229, 212, 234, 223, 179, 215, 218, 223, 225, 221, 224, 225, 222, 227, 222, 222, 222, 222, 222, 222, 222, 222, 222, 222, 214, 214, 214, 216, 215, 215, 215, 214, 213, 213, 213, 211, 211, 215, 219, 211, 206, 219, 170, 123, 88, 80, 93, 84, 96, 140, 195, 126, 216, 131, 80, 92, 84, 65, 43, 75, 49, 65, 76, 142, 191, 142, 122, 101, 91, 79, 109, 43, 75, 72, 104, 65, 55, 52, 79, 116, 121, 139, 20, 47, 63, 81, 78, 74, 118, 128, 65, 62, 67, 49, 77, 115, 99, 92, 65, 80, 62, 57, 71, 86, 107, 162, 169, 176, 177, 144, 190, 180, 163, 139, 127, 172, 163, 144, 202, 214, 206, 204, 153, 206, 115, 82, 71, 60, 76, 64, 124, 188, 177, 111, 114, 116, 120, 101, 136, 129, 138, 192, 183, 163, 154, 92, 89, 110, 155, 152, 179, 158, 147, 199, 194, 201, 170, 157, 164, 145, 223, 229, 188, 163, 211, 196, 201, 204, 184, 179, 181, 194, 227, 202, 218, 226, 211, 209, 225, 230, 227, 222, 224, 220, 222, 221, 222, 221, 224, 224, 224, 225, 225, 225, 225, 226, 226, 226, 226, 226, 226, 226, 226, 226, 227, 227, 228, 228, 227, 227, 227, 227, 227, 227, 227, 218, 233, 228, 216, 221, 227, 179, 199, 226, 225, 226, 225, 230, 224, 224, 224, 224, 224, 223, 222, 222, 225, 225, 226, 226, 225, 225, 225, 218, 230, 221, 215, 224, 222, 220, 223, 224, 225, 225, 223, 222, 234, 218, 222, 222, 178, 211, 215, 224, 226, 220, 223, 224, 222, 228, 223, 223, 223, 223, 223, 223, 222, 221, 221, 221, 215, 214, 213, 215, 215, 213, 213, 214, 213, 213, 213, 211, 211, 212, 215, 224, 211, 218, 151, 99, 98, 104, 117, 113, 148, 190, 219, 207, 218, 159, 73, 85, 86, 76, 37, 55, 60, 65, 97, 175, 222, 209, 168, 156, 113, 84, 79, 76, 86, 83, 137, 38, 59, 47, 80, 128, 92, 107, 28, 42, 54, 63, 83, 73, 116, 110, 66, 83, 54, 60, 51, 94, 66, 82, 85, 66, 79, 62, 84, 66, 96, 172, 138, 141, 139, 124, 143, 140, 173, 116, 106, 139, 118, 134, 184, 202, 188, 192, 139, 139, 110, 81, 69, 62, 81, 78, 133, 159, 138, 106, 163, 83, 100, 93, 161, 126, 118, 142, 175, 140, 172, 104, 108, 117, 135, 144, 198, 135, 147, 197, 193, 176, 173, 198, 158, 156, 219, 226, 212, 155, 221, 157, 210, 202, 167, 175, 159, 208, 218, 206, 219, 192, 209, 231, 217, 223, 208, 228, 223, 219, 221, 224, 224, 221, 222, 223, 223, 224, 225, 226, 226, 226, 226, 226, 226, 226, 226, 226, 226, 227, 227, 228, 228, 228, 227, 227, 227, 227, 227, 227, 227, 226, 220, 218, 223, 220, 217, 183, 186, 223, 229, 226, 220, 226, 224, 223, 224, 225, 225, 223, 221, 221, 225, 225, 225, 225, 225, 225, 226, 217, 231, 239, 231, 230, 222, 218, 220, 221, 223, 224, 223, 223, 237, 216, 213, 219, 202, 216, 211, 223, 226, 221, 224, 224, 222, 227, 224, 224, 224, 224, 224, 224, 223, 221, 221, 221, 217, 215, 213, 215, 214, 212, 210, 214, 213, 213, 213, 211, 211, 212, 211, 214, 209, 207, 78, 79, 97, 134, 123, 204, 225, 217, 214, 188, 147, 132, 94, 81, 69, 98, 38, 51, 46, 77, 108, 165, 194, 212, 206, 229, 140, 112, 120, 129, 146, 132, 100, 53, 39, 54, 73, 43, 75, 57, 27, 52, 52, 57, 102, 98, 108, 88, 75, 77, 46, 87, 79, 63, 93, 123, 92, 12, 99, 88, 86, 84, 85, 88, 132, 105, 115, 128, 165, 121, 128, 109, 78, 122, 94, 131, 218, 177, 179, 157, 157, 85, 91, 59, 72, 54, 78, 65, 106, 115, 135, 118, 178, 86, 143, 103, 129, 99, 99, 97, 123, 100, 148, 123, 153, 105, 108, 144, 148, 83, 162, 179, 166, 150, 121, 238, 201, 146, 193, 225, 219, 158, 215, 160, 225, 177, 163, 213, 162, 235, 203, 183, 204, 155, 162, 227, 185, 189, 210, 223, 223, 226, 223, 222, 221, 222, 221, 222, 223, 224, 225, 226, 226, 226, 226, 226, 226, 226, 226, 226, 226, 226, 227, 227, 228, 228, 227, 227, 227, 227, 227, 227, 227, 239, 221, 225, 239, 230, 228, 218, 185, 222, 227, 225, 219, 225, 222, 223, 223, 224, 224, 223, 221, 221, 225, 225, 224, 224, 225, 225, 222, 227, 224, 215, 196, 226, 220, 218, 221, 222, 222, 223, 223, 223, 205, 225, 236, 190, 205, 228, 226, 221, 225, 222, 226, 225, 221, 225, 224, 224, 224, 224, 224, 224, 222, 221, 221, 221, 219, 215, 213, 215, 214, 212, 209, 214, 213, 213, 213, 211, 211, 205, 200, 196, 221, 201, 78, 88, 98, 101, 210, 211, 210, 212, 175, 101, 120, 128, 128, 72, 55, 71, 23, 138, 97, 131, 125, 177, 208, 246, 212, 210, 136, 134, 207, 96, 168, 101, 43, 58, 48, 55, 42, 80, 79, 22, 79, 46, 58, 54, 76, 91, 86, 70, 67, 43, 55, 55, 85, 60, 93, 65, 57, 76, 92, 80, 82, 103, 83, 96, 93, 118, 142, 113, 175, 117, 109, 108, 58, 105, 102, 100, 213, 129, 102, 92, 67, 140, 70, 125, 112, 45, 92, 80, 121, 127, 111, 101, 179, 122, 127, 91, 159, 153, 57, 109, 150, 105, 88, 115, 120, 159, 108, 148, 92, 171, 145, 145, 126, 189, 195, 202, 186, 162, 241, 210, 168, 204, 168, 153, 188, 152, 172, 91, 153, 183, 147, 177, 139, 189, 236, 210, 209, 215, 224, 212, 222, 235, 225, 216, 213, 222, 220, 220, 222, 224, 226, 227, 226, 225, 225, 225, 225, 225, 225, 225, 225, 225, 226, 226, 226, 227, 226, 226, 226, 226, 226, 226, 226, 215, 228, 226, 210, 210, 232, 216, 199, 223, 220, 222, 223, 228, 220, 222, 223, 223, 223, 222, 222, 222, 225, 224, 224, 224, 224, 225, 226, 226, 209, 246, 189, 203, 215, 226, 225, 225, 223, 222, 222, 222, 203, 238, 224, 174, 203, 248, 211, 219, 225, 223, 228, 227, 220, 223, 221, 221, 221, 221, 221, 221, 220, 220, 220, 220, 219, 214, 213, 215, 216, 214, 210, 213, 213, 213, 213, 211, 211, 213, 223, 222, 214, 100, 100, 60, 79, 116, 146, 215, 210, 208, 186, 112, 107, 119, 106, 49, 57, 35, 83, 156, 102, 67, 84, 111, 115, 198, 172, 144, 109, 96, 97, 167, 135, 128, 84, 112, 37, 42, 49, 46, 38, 63, 86, 28, 42, 57, 42, 60, 62, 60, 78, 75, 105, 99, 60, 85, 84, 53, 63, 49, 88, 80, 63, 85, 66, 96, 69, 94, 123, 109, 90, 134, 96, 93, 56, 58, 131, 129, 194, 205, 153, 179, 152, 133, 95, 95, 94, 58, 57, 116, 163, 124, 98, 141, 160, 100, 84, 138, 147, 112, 86, 150, 137, 125, 124, 134, 124, 171, 103, 129, 161, 114, 137, 135, 192, 135, 215, 199, 186, 164, 171, 177, 159, 124, 155, 144, 173, 139, 118, 124, 150, 182, 207, 198, 226, 191, 217, 203, 195, 216, 235, 216, 219, 230, 221, 217, 213, 219, 219, 220, 222, 223, 226, 227, 227, 224, 224, 224, 224, 224, 224, 224, 224, 224, 224, 225, 225, 226, 225, 225, 225, 225, 225, 225, 225, 228, 227, 229, 221, 208, 222, 222, 199, 224, 221, 224, 224, 229, 222, 222, 222, 221, 222, 222, 223, 223, 225, 224, 223, 223, 224, 225, 226, 229, 211, 209, 176, 215, 226, 227, 225, 224, 223, 222, 222, 222, 227, 231, 214, 226, 208, 233, 213, 220, 225, 223, 227, 226, 221, 224, 221, 221, 221, 221, 221, 221, 220, 219, 219, 219, 217, 214, 212, 217, 218, 215, 212, 214, 213, 213, 213, 211, 211, 212, 217, 215, 210, 136, 83, 122, 136, 204, 188, 215, 217, 211, 158, 171, 63, 78, 80, 43, 71, 59, 96, 184, 82, 68, 69, 75, 85, 148, 194, 120, 103, 139, 101, 206, 181, 133, 89, 102, 83, 33, 63, 52, 67, 68, 77, 55, 70, 69, 41, 70, 67, 59, 81, 77, 85, 96, 80, 84, 85, 73, 76, 58, 68, 77, 71, 73, 79, 74, 76, 74, 89, 79, 95, 117, 79, 82, 56, 66, 104, 148, 154, 175, 144, 187, 219, 149, 87, 96, 85, 69, 55, 172, 147, 130, 110, 119, 144, 187, 140, 122, 143, 123, 83, 115, 129, 135, 126, 138, 141, 183, 101, 103, 142, 102, 170, 197, 204, 159, 174, 174, 128, 167, 183, 166, 133, 145, 107, 137, 166, 121, 86, 163, 173, 178, 235, 199, 217, 213, 192, 176, 161, 210, 227, 233, 215, 217, 215, 223, 218, 218, 218, 219, 221, 223, 226, 227, 226, 223, 223, 223, 223, 223, 223, 223, 223, 223, 224, 224, 224, 225, 224, 224, 224, 224, 224, 224, 224, 228, 222, 226, 227, 215, 220, 212, 187, 224, 228, 227, 221, 227, 225, 222, 221, 220, 221, 222, 224, 225, 225, 224, 222, 222, 224, 225, 223, 208, 209, 201, 209, 225, 227, 221, 222, 220, 221, 221, 222, 223, 231, 231, 208, 211, 208, 228, 221, 221, 225, 222, 226, 226, 221, 225, 222, 222, 222, 222, 222, 222, 221, 219, 219, 219, 180, 192, 212, 214, 211, 215, 215, 214, 213, 213, 213, 211, 210, 210, 211, 212, 212, 188, 143, 184, 191, 232, 215, 210, 215, 211, 182, 175, 108, 52, 74, 62, 86, 56, 69, 125, 85, 63, 51, 60, 66, 111, 155, 92, 80, 109, 102, 162, 162, 125, 69, 93, 107, 36, 73, 68, 78, 91, 54, 67, 90, 79, 39, 68, 67, 72, 76, 64, 67, 74, 77, 79, 68, 74, 79, 67, 62, 72, 67, 66, 80, 55, 67, 61, 72, 74, 93, 86, 70, 70, 59, 67, 83, 124, 128, 133, 103, 148, 203, 160, 97, 98, 88, 59, 54, 181, 145, 110, 92, 103, 134, 175, 161, 91, 131, 107, 55, 86, 113, 167, 132, 153, 130, 150, 110, 125, 137, 121, 214, 212, 177, 146, 123, 131, 109, 152, 171, 175, 105, 130, 112, 115, 116, 93, 84, 152, 166, 177, 194, 144, 193, 207, 136, 141, 152, 211, 212, 232, 214, 225, 216, 222, 216, 216, 217, 220, 223, 224, 224, 225, 224, 223, 223, 224, 224, 224, 224, 224, 224, 224, 224, 224, 224, 224, 224, 224, 224, 224, 224, 224, 224, 229, 217, 220, 226, 213, 217, 229, 195, 229, 229, 224, 218, 225, 230, 222, 220, 221, 222, 221, 223, 226, 228, 224, 225, 218, 221, 217, 220, 206, 211, 198, 209, 225, 224, 219, 221, 219, 218, 220, 221, 218, 226, 227, 215, 210, 223, 227, 223, 221, 223, 223, 225, 225, 224, 226, 223, 223, 223, 223, 223, 223, 222, 221, 221, 221, 180, 171, 208, 214, 212, 214, 216, 212, 212, 213, 214, 213, 212, 212, 212, 213, 212, 209, 210, 213, 215, 216, 219, 211, 204, 212, 214, 172, 178, 80, 103, 110, 96, 48, 49, 57, 89, 51, 56, 66, 52, 103, 101, 88, 62, 58, 77, 93, 98, 98, 65, 105, 105, 47, 67, 68, 66, 99, 45, 64, 89, 78, 55, 68, 64, 79, 66, 49, 55, 58, 60, 66, 49, 59, 65, 59, 63, 64, 54, 65, 75, 46, 52, 56, 64, 73, 74, 65, 61, 59, 57, 65, 68, 121, 113, 106, 74, 112, 144, 163, 102, 89, 91, 52, 57, 131, 119, 79, 80, 86, 122, 120, 118, 89, 117, 83, 52, 86, 116, 162, 116, 159, 114, 118, 117, 146, 145, 147, 223, 172, 140, 114, 113, 107, 148, 122, 155, 166, 88, 125, 122, 91, 71, 99, 100, 129, 150, 159, 129, 117, 164, 190, 84, 111, 165, 214, 208, 217, 217, 231, 215, 219, 218, 215, 216, 220, 223, 223, 223, 222, 223, 222, 223, 224, 224, 224, 224, 224, 224, 224, 224, 224, 224, 224, 224, 224, 224, 224, 224, 224, 224, 222, 225, 225, 223, 220, 220, 220, 193, 222, 224, 222, 223, 219, 226, 222, 219, 222, 224, 220, 222, 225, 226, 220, 226, 215, 222, 213, 221, 205, 225, 194, 190, 222, 223, 223, 224, 221, 219, 222, 222, 217, 223, 226, 197, 205, 227, 226, 224, 221, 222, 223, 224, 225, 226, 225, 223, 223, 223, 223, 223, 223, 223, 223, 223, 223, 222, 176, 205, 222, 224, 214, 212, 208, 209, 212, 215, 215, 216, 216, 215, 210, 206, 207, 211, 214, 217, 211, 220, 217, 200, 215, 212, 211, 168, 136, 133, 137, 97, 61, 49, 57, 69, 49, 76, 73, 55, 104, 114, 115, 65, 64, 53, 67, 59, 62, 73, 116, 92, 49, 50, 54, 57, 78, 77, 66, 71, 64, 83, 83, 68, 61, 58, 43, 38, 63, 55, 44, 53, 52, 48, 39, 59, 56, 47, 68, 77, 41, 42, 55, 59, 64, 62, 61, 44, 51, 52, 70, 58, 143, 101, 91, 72, 105, 107, 160, 85, 83, 77, 64, 79, 68, 57, 67, 91, 66, 115, 106, 61, 109, 103, 84, 81, 93, 143, 113, 84, 136, 124, 141, 112, 135, 143, 152, 195, 130, 122, 119, 136, 114, 183, 115, 167, 128, 79, 152, 86, 92, 91, 154, 119, 122, 164, 126, 99, 150, 128, 165, 71, 99, 165, 199, 207, 190, 218, 215, 210, 217, 228, 216, 217, 220, 222, 222, 221, 222, 222, 221, 221, 223, 223, 223, 223, 223, 224, 224, 224, 224, 224, 224, 224, 224, 224, 224, 224, 224, 224, 211, 234, 233, 223, 235, 228, 184, 165, 200, 221, 224, 229, 217, 217, 219, 219, 223, 225, 221, 221, 221, 217, 214, 222, 216, 224, 219, 227, 189, 230, 192, 182, 221, 221, 225, 226, 225, 223, 225, 226, 223, 221, 233, 160, 175, 212, 223, 224, 221, 222, 223, 225, 225, 225, 224, 223, 223, 223, 223, 223, 223, 223, 223, 223, 223, 150, 201, 221, 230, 213, 211, 203, 212, 213, 214, 214, 213, 212, 214, 215, 207, 204, 208, 213, 213, 217, 217, 202, 205, 222, 215, 226, 222, 81, 103, 70, 39, 89, 49, 26, 80, 51, 54, 28, 33, 77, 47, 186, 97, 51, 73, 50, 72, 58, 63, 16, 87, 51, 28, 54, 62, 59, 99, 141, 71, 45, 53, 58, 73, 70, 38, 55, 55, 41, 79, 58, 37, 70, 65, 58, 38, 59, 53, 48, 67, 67, 38, 22, 49, 74, 94, 64, 59, 26, 48, 59, 59, 84, 57, 113, 88, 68, 99, 108, 132, 85, 102, 43, 61, 114, 63, 63, 86, 53, 104, 143, 68, 69, 78, 74, 83, 74, 64, 136, 144, 125, 108, 148, 207, 104, 157, 159, 119, 189, 135, 141, 156, 103, 99, 113, 184, 156, 107, 68, 82, 58, 135, 169, 191, 135, 77, 207, 128, 117, 126, 107, 83, 91, 119, 110, 154, 167, 139, 207, 198, 221, 213, 222, 221, 226, 227, 226, 222, 220, 219, 220, 220, 221, 222, 222, 222, 222, 223, 224, 224, 224, 224, 224, 224, 224, 224, 224, 224, 224, 224, 224, 225, 205, 209, 222, 211, 216, 247, 163, 205, 215, 218, 213, 240, 228, 217, 218, 224, 226, 223, 221, 221, 219, 216, 222, 217, 222, 217, 226, 186, 178, 198, 171, 228, 207, 217, 223, 224, 222, 223, 225, 224, 212, 236, 200, 177, 224, 229, 215, 221, 222, 223, 225, 225, 225, 224, 223, 223, 223, 223, 223, 223, 223, 223, 223, 223, 147, 158, 217, 210, 206, 208, 214, 214, 214, 213, 212, 209, 207, 208, 210, 209, 210, 213, 213, 209, 207, 219, 200, 198, 219, 150, 135, 99, 123, 51, 70, 56, 38, 93, 140, 122, 58, 60, 38, 67, 13, 54, 123, 61, 98, 33, 54, 34, 39, 48, 51, 72, 47, 72, 42, 89, 67, 142, 86, 74, 55, 62, 78, 50, 72, 63, 49, 57, 50, 81, 52, 36, 66, 64, 64, 58, 63, 56, 55, 55, 44, 39, 49, 41, 49, 66, 47, 57, 51, 48, 53, 81, 47, 89, 106, 59, 71, 82, 84, 105, 69, 88, 65, 41, 54, 51, 52, 65, 60, 72, 77, 94, 67, 105, 89, 121, 61, 94, 107, 136, 128, 93, 156, 120, 75, 122, 151, 164, 79, 177, 172, 124, 121, 64, 204, 144, 94, 76, 66, 131, 101, 104, 108, 171, 145, 75, 103, 102, 153, 99, 61, 86, 79, 87, 127, 184, 204, 225, 198, 197, 222, 221, 223, 229, 227, 227, 225, 221, 219, 219, 221, 220, 221, 222, 223, 222, 222, 222, 223, 223, 223, 223, 223, 223, 223, 223, 223, 223, 223, 223, 223, 222, 235, 233, 226, 227, 214, 181, 180, 206, 231, 219, 229, 216, 221, 217, 218, 222, 224, 223, 222, 224, 226, 223, 224, 220, 219, 215, 192, 166, 175, 234, 165, 227, 229, 219, 220, 223, 219, 217, 220, 221, 228, 204, 231, 215, 224, 217, 228, 221, 222, 223, 224, 224, 224, 224, 222, 222, 222, 222, 222, 222, 222, 222, 222, 222, 150, 199, 196, 201, 213, 228, 206, 210, 210, 210, 211, 209, 208, 208, 209, 212, 214, 213, 211, 210, 209, 226, 221, 213, 207, 132, 117, 98, 124, 87, 61, 45, 51, 65, 134, 80, 42, 58, 47, 32, 65, 66, 58, 73, 55, 45, 54, 40, 51, 46, 40, 57, 53, 77, 76, 79, 60, 97, 58, 116, 79, 60, 61, 70, 69, 65, 69, 47, 58, 77, 50, 51, 54, 51, 57, 64, 62, 55, 52, 43, 34, 40, 27, 29, 49, 61, 59, 33, 41, 67, 62, 57, 58, 85, 80, 128, 74, 69, 76, 79, 56, 65, 68, 41, 56, 62, 65, 67, 84, 83, 109, 77, 66, 56, 91, 90, 82, 90, 75, 91, 88, 88, 139, 135, 75, 137, 164, 155, 110, 174, 141, 135, 126, 40, 127, 118, 87, 63, 126, 145, 140, 78, 81, 133, 118, 93, 113, 122, 123, 99, 59, 98, 59, 109, 163, 146, 160, 144, 191, 198, 183, 222, 225, 215, 219, 220, 220, 219, 220, 222, 223, 221, 221, 222, 223, 223, 223, 223, 223, 223, 223, 223, 223, 223, 223, 223, 223, 223, 223, 223, 223, 232, 216, 214, 225, 225, 221, 228, 159, 201, 219, 221, 213, 231, 232, 218, 219, 220, 221, 222, 223, 223, 223, 222, 221, 223, 220, 218, 187, 147, 189, 221, 178, 218, 211, 214, 222, 225, 219, 218, 220, 221, 216, 227, 208, 183, 207, 235, 213, 221, 222, 223, 224, 224, 223, 223, 222, 222, 222, 222, 222, 222, 222, 222, 222, 222, 179, 201, 212, 218, 211, 217, 212, 210, 209, 210, 210, 208, 208, 208, 211, 213, 213, 209, 209, 213, 210, 217, 208, 206, 189, 111, 125, 136, 116, 78, 56, 49, 44, 54, 107, 64, 48, 47, 46, 27, 66, 107, 53, 59, 37, 47, 50, 33, 50, 52, 46, 45, 72, 54, 70, 63, 57, 78, 109, 93, 87, 98, 78, 64, 60, 72, 71, 54, 61, 68, 52, 67, 49, 47, 52, 54, 53, 48, 39, 35, 38, 39, 21, 31, 39, 47, 64, 54, 51, 65, 60, 59, 80, 113, 72, 126, 71, 66, 93, 67, 59, 56, 60, 48, 70, 38, 56, 68, 80, 68, 103, 72, 60, 56, 65, 64, 65, 73, 56, 70, 83, 70, 123, 111, 93, 133, 201, 145, 178, 149, 131, 116, 104, 94, 111, 112, 82, 55, 145, 144, 136, 75, 90, 116, 96, 69, 105, 91, 93, 82, 53, 86, 68, 123, 154, 133, 141, 158, 200, 166, 198, 216, 218, 213, 218, 220, 221, 220, 219, 221, 222, 221, 222, 223, 223, 223, 223, 223, 222, 222, 222, 222, 222, 222, 222, 222, 222, 222, 222, 222, 222, 220, 220, 223, 223, 217, 218, 229, 198, 210, 215, 225, 228, 219, 229, 220, 221, 219, 218, 221, 223, 222, 220, 221, 218, 224, 219, 219, 185, 156, 194, 206, 167, 213, 217, 217, 224, 224, 220, 219, 220, 220, 221, 236, 203, 175, 204, 226, 222, 221, 222, 223, 223, 223, 222, 222, 221, 221, 221, 221, 221, 221, 221, 221, 221, 221, 204, 206, 216, 226, 209, 210, 217, 212, 212, 212, 211, 208, 206, 208, 214, 214, 211, 208, 210, 215, 211, 216, 200, 206, 190, 98, 112, 116, 96, 49, 71, 52, 44, 51, 69, 61, 48, 46, 45, 37, 58, 93, 59, 50, 42, 43, 52, 35, 44, 60, 64, 44, 89, 49, 58, 59, 59, 93, 108, 85, 98, 133, 98, 65, 68, 72, 64, 66, 53, 56, 52, 67, 49, 48, 46, 49, 43, 41, 32, 34, 45, 37, 29, 43, 36, 43, 64, 89, 66, 57, 54, 71, 92, 104, 73, 90, 68, 73, 119, 69, 64, 48, 60, 50, 68, 41, 59, 65, 68, 52, 74, 71, 44, 69, 60, 61, 47, 52, 71, 60, 89, 94, 97, 89, 103, 112, 206, 117, 184, 133, 122, 95, 80, 115, 125, 91, 74, 66, 127, 143, 123, 68, 81, 101, 79, 47, 79, 62, 74, 62, 51, 66, 115, 161, 140, 127, 149, 185, 172, 167, 220, 219, 212, 220, 221, 222, 223, 220, 219, 219, 220, 220, 221, 222, 223, 223, 222, 222, 222, 222, 222, 222, 222, 222, 222, 222, 222, 222, 222, 222, 222, 214, 227, 229, 220, 220, 217, 201, 186, 209, 216, 221, 210, 191, 228, 220, 222, 219, 218, 221, 222, 221, 220, 221, 216, 224, 216, 217, 173, 156, 156, 176, 142, 214, 224, 218, 222, 222, 218, 219, 221, 219, 219, 224, 215, 186, 220, 216, 229, 221, 222, 223, 223, 222, 222, 221, 221, 221, 221, 221, 221, 221, 221, 221, 221, 221, 210, 227, 202, 216, 208, 220, 216, 212, 212, 213, 213, 210, 209, 210, 214, 213, 212, 212, 214, 214, 213, 221, 210, 219, 206, 121, 91, 74, 72, 42, 79, 50, 55, 46, 44, 53, 40, 54, 56, 55, 61, 40, 63, 65, 51, 44, 46, 47, 50, 64, 73, 58, 85, 65, 59, 60, 63, 107, 52, 103, 103, 121, 90, 77, 87, 64, 63, 71, 41, 53, 52, 53, 50, 53, 40, 60, 36, 40, 37, 36, 49, 36, 34, 55, 50, 53, 63, 92, 65, 53, 54, 70, 82, 61, 69, 63, 70, 88, 157, 71, 68, 41, 62, 40, 44, 75, 73, 64, 68, 51, 58, 62, 32, 63, 72, 66, 49, 34, 88, 63, 102, 144, 72, 84, 94, 101, 152, 77, 135, 131, 108, 112, 82, 83, 109, 58, 73, 97, 93, 146, 104, 67, 56, 76, 71, 68, 49, 64, 62, 51, 59, 47, 166, 192, 139, 122, 143, 151, 128, 195, 211, 221, 206, 224, 215, 218, 220, 219, 218, 217, 218, 219, 220, 221, 222, 222, 221, 222, 222, 222, 222, 222, 222, 222, 222, 222, 222, 222, 222, 222, 222, 221, 221, 217, 221, 229, 220, 196, 147, 204, 214, 214, 171, 168, 231, 220, 223, 221, 218, 222, 220, 218, 220, 222, 215, 226, 216, 218, 160, 144, 135, 149, 126, 215, 221, 217, 219, 218, 218, 221, 223, 219, 204, 190, 205, 196, 236, 217, 222, 221, 222, 223, 223, 222, 222, 221, 221, 221, 221, 221, 221, 221, 221, 221, 221, 221, 215, 225, 215, 211, 205, 218, 221, 208, 210, 211, 214, 214, 215, 215, 213, 213, 215, 219, 218, 212, 206, 209, 214, 219, 210, 190, 124, 125, 74, 59, 37, 55, 47, 44, 57, 41, 51, 53, 82, 89, 40, 52, 96, 80, 56, 54, 16, 45, 67, 61, 70, 78, 52, 69, 57, 42, 64, 85, 66, 77, 80, 66, 66, 66, 86, 62, 64, 66, 40, 62, 58, 42, 55, 59, 39, 83, 34, 40, 49, 38, 43, 38, 28, 57, 69, 60, 60, 51, 40, 46, 54, 55, 50, 65, 60, 49, 71, 108, 204, 55, 79, 46, 46, 30, 26, 87, 60, 68, 76, 53, 67, 47, 49, 51, 56, 45, 56, 31, 51, 91, 145, 139, 77, 62, 76, 111, 79, 67, 119, 119, 104, 161, 124, 83, 57, 58, 91, 138, 69, 137, 57, 101, 67, 57, 77, 114, 21, 70, 56, 54, 67, 33, 161, 144, 123, 141, 95, 97, 141, 175, 184, 202, 188, 217, 198, 205, 210, 214, 217, 218, 219, 218, 219, 220, 221, 221, 220, 221, 222, 222, 222, 222, 222, 222, 221, 222, 222, 222, 222, 222, 222, 222, 213, 217, 226, 226, 222, 227, 208, 218, 211, 218, 192, 161, 218, 218, 224, 223, 220, 221, 218, 217, 219, 222, 216, 228, 219, 221, 170, 154, 207, 166, 141, 207, 219, 219, 218, 217, 219, 223, 224, 221, 195, 139, 142, 202, 224, 219, 221, 222, 222, 223, 222, 222, 221, 221, 221, 221, 221, 221, 221, 221, 221, 221, 221, 221, 217, 220, 228, 211, 226, 215, 209, 219, 220, 209, 213, 207, 201, 212, 213, 213, 215, 217, 217, 215, 209, 216, 193, 220, 203, 199, 216, 140, 136, 42, 25, 64, 61, 38, 35, 45, 42, 87, 109, 70, 28, 49, 69, 54, 47, 61, 56, 40, 53, 52, 76, 67, 65, 82, 67, 47, 72, 64, 101, 57, 81, 77, 85, 77, 70, 45, 53, 56, 54, 38, 52, 42, 60, 51, 39, 89, 37, 22, 53, 40, 28, 54, 43, 47, 58, 40, 37, 39, 42, 40, 26, 44, 52, 57, 52, 54, 46, 101, 86, 76, 108, 60, 43, 53, 91, 92, 44, 52, 44, 40, 50, 30, 53, 44, 51, 20, 41, 67, 54, 86, 155, 107, 74, 96, 78, 70, 114, 79, 106, 105, 76, 98, 200, 75, 74, 92, 155, 211, 159, 38, 67, 91, 73, 94, 56, 78, 49, 61, 74, 89, 68, 94, 67, 88, 105, 121, 124, 193, 143, 166, 187, 229, 171, 209, 192, 205, 205, 212, 220, 214, 216, 215, 217, 218, 220, 221, 222, 221, 220, 220, 220, 220, 220, 220, 219, 221, 224, 223, 221, 219, 220, 212, 230, 223, 206, 219, 231, 218, 171, 160, 207, 233, 224, 188, 188, 209, 222, 225, 217, 211, 220, 228, 224, 223, 223, 216, 213, 200, 208, 176, 171, 158, 221, 218, 221, 210, 215, 208, 222, 215, 205, 210, 200, 154, 122, 213, 203, 230, 226, 225, 223, 220, 218, 217, 218, 218, 220, 220, 220, 220, 220, 220, 220, 220, 220, 220, 178, 181, 211, 218, 211, 205, 203, 219, 217, 207, 221, 227, 211, 210, 215, 213, 213, 215, 216, 215, 220, 225, 182, 231, 218, 197, 213, 194, 196, 41, 61, 34, 44, 42, 37, 52, 38, 56, 106, 102, 59, 40, 48, 47, 46, 42, 48, 61, 57, 54, 71, 62, 91, 53, 55, 54, 48, 58, 59, 63, 81, 67, 76, 52, 52, 49, 73, 70, 44, 39, 61, 54, 65, 56, 41, 72, 47, 40, 58, 45, 32, 48, 44, 35, 39, 40, 58, 40, 25, 32, 41, 45, 38, 42, 49, 49, 30, 65, 101, 112, 70, 75, 62, 49, 47, 73, 57, 55, 41, 45, 47, 41, 61, 59, 44, 39, 27, 60, 41, 78, 126, 95, 37, 82, 64, 65, 86, 55, 112, 91, 81, 85, 121, 45, 63, 77, 150, 169, 135, 63, 49, 58, 46, 56, 135, 61, 59, 41, 38, 46, 57, 97, 97, 69, 87, 73, 97, 149, 170, 183, 199, 176, 208, 229, 206, 216, 219, 223, 217, 212, 223, 221, 220, 220, 220, 219, 219, 219, 220, 220, 220, 220, 220, 220, 220, 220, 222, 221, 221, 221, 221, 226, 215, 213, 225, 228, 224, 221, 205, 222, 218, 210, 212, 189, 150, 200, 207, 215, 221, 223, 218, 215, 212, 211, 216, 219, 226, 220, 218, 149, 188, 192, 181, 218, 214, 214, 234, 222, 216, 212, 217, 219, 211, 196, 192, 229, 220, 218, 218, 219, 219, 218, 219, 219, 221, 221, 220, 220, 220, 220, 220, 220, 220, 220, 220, 220, 166, 182, 197, 218, 216, 217, 222, 211, 211, 205, 215, 217, 210, 213, 216, 213, 212, 214, 215, 215, 211, 213, 211, 214, 210, 217, 224, 226, 154, 53, 50, 45, 43, 33, 25, 43, 71, 61, 76, 74, 63, 54, 52, 55, 54, 41, 47, 73, 56, 57, 67, 63, 110, 51, 54, 62, 57, 65, 69, 75, 86, 74, 65, 67, 70, 71, 73, 58, 35, 44, 63, 55, 54, 45, 33, 48, 50, 50, 51, 43, 34, 38, 38, 39, 40, 41, 55, 38, 32, 38, 46, 44, 50, 27, 51, 44, 49, 58, 118, 117, 71, 76, 68, 56, 55, 69, 51, 44, 39, 46, 45, 46, 49, 61, 35, 50, 54, 39, 81, 118, 86, 75, 50, 84, 69, 82, 82, 81, 90, 69, 64, 103, 89, 74, 66, 75, 133, 160, 83, 66, 52, 48, 50, 64, 90, 33, 30, 68, 97, 128, 128, 142, 152, 79, 68, 146, 129, 168, 141, 179, 225, 191, 200, 220, 198, 211, 216, 220, 213, 212, 226, 224, 223, 222, 220, 219, 217, 218, 220, 220, 220, 220, 220, 220, 220, 220, 219, 219, 221, 222, 223, 223, 217, 220, 228, 225, 220, 223, 219, 202, 226, 229, 222, 178, 202, 215, 216, 217, 217, 217, 218, 220, 219, 215, 216, 217, 222, 214, 223, 179, 195, 209, 170, 214, 219, 212, 226, 217, 211, 217, 227, 222, 223, 210, 173, 221, 216, 213, 215, 216, 216, 217, 218, 220, 222, 223, 220, 220, 220, 220, 220, 220, 220, 220, 220, 220, 160, 164, 174, 181, 217, 210, 218, 212, 212, 215, 217, 206, 207, 219, 216, 213, 212, 213, 214, 214, 206, 200, 229, 203, 203, 202, 169, 162, 112, 63, 40, 65, 35, 21, 32, 45, 113, 77, 78, 53, 62, 57, 56, 56, 55, 53, 56, 72, 62, 65, 66, 64, 92, 57, 41, 48, 60, 58, 81, 65, 64, 69, 48, 75, 73, 71, 60, 50, 43, 56, 62, 55, 42, 37, 33, 33, 44, 45, 36, 38, 36, 35, 40, 40, 39, 49, 53, 41, 43, 41, 40, 41, 53, 26, 52, 45, 61, 47, 69, 109, 71, 58, 62, 66, 64, 62, 49, 38, 31, 41, 42, 43, 26, 52, 37, 53, 74, 40, 80, 104, 64, 48, 77, 81, 72, 77, 71, 99, 63, 70, 74, 101, 74, 99, 64, 68, 107, 123, 75, 57, 43, 59, 51, 44, 46, 26, 90, 100, 132, 170, 178, 180, 163, 140, 146, 185, 111, 169, 141, 178, 198, 216, 192, 229, 202, 215, 215, 216, 216, 214, 222, 222, 221, 221, 220, 219, 218, 219, 219, 219, 219, 219, 219, 219, 221, 220, 218, 218, 221, 222, 221, 216, 223, 226, 220, 216, 220, 226, 207, 168, 231, 216, 214, 168, 219, 218, 223, 223, 218, 214, 219, 223, 222, 219, 220, 216, 217, 206, 197, 175, 219, 220, 174, 214, 221, 214, 218, 214, 214, 217, 223, 219, 225, 218, 134, 182, 215, 215, 215, 217, 217, 217, 217, 218, 219, 220, 219, 219, 219, 219, 219, 219, 219, 219, 219, 219, 153, 140, 169, 162, 190, 204, 208, 217, 214, 222, 223, 207, 207, 217, 214, 212, 213, 214, 214, 212, 212, 202, 221, 217, 198, 152, 115, 78, 120, 66, 51, 78, 34, 40, 53, 43, 110, 114, 117, 63, 53, 58, 64, 60, 58, 71, 67, 65, 70, 70, 65, 61, 54, 58, 26, 36, 54, 49, 72, 51, 39, 51, 42, 67, 61, 55, 55, 55, 56, 67, 56, 56, 37, 37, 44, 32, 34, 34, 25, 37, 39, 39, 44, 34, 34, 56, 55, 43, 51, 36, 36, 35, 36, 37, 48, 52, 57, 37, 17, 101, 55, 50, 61, 65, 48, 50, 51, 36, 28, 39, 41, 35, 13, 44, 51, 54, 61, 56, 54, 64, 70, 41, 87, 60, 71, 62, 62, 87, 62, 86, 92, 89, 66, 102, 62, 61, 95, 76, 78, 52, 25, 61, 51, 29, 45, 35, 141, 110, 127, 163, 194, 153, 152, 196, 222, 176, 103, 174, 158, 176, 161, 197, 173, 229, 217, 222, 217, 220, 223, 217, 218, 218, 218, 219, 220, 220, 221, 220, 219, 219, 219, 219, 219, 219, 221, 220, 218, 219, 221, 221, 219, 216, 221, 221, 214, 214, 221, 228, 202, 177, 230, 196, 174, 135, 210, 218, 222, 223, 221, 218, 220, 220, 216, 219, 221, 217, 218, 210, 177, 175, 232, 194, 170, 211, 217, 220, 217, 221, 220, 213, 216, 221, 220, 222, 130, 174, 215, 219, 216, 219, 219, 218, 218, 217, 216, 217, 219, 219, 219, 219, 219, 219, 219, 219, 219, 219, 130, 146, 185, 189, 139, 217, 216, 214, 209, 210, 210, 211, 208, 206, 212, 212, 213, 215, 214, 211, 219, 216, 200, 235, 182, 104, 130, 75, 153, 69, 75, 85, 54, 84, 76, 25, 54, 158, 159, 89, 39, 70, 79, 77, 70, 81, 68, 59, 68, 60, 61, 60, 35, 55, 32, 51, 49, 58, 49, 59, 43, 40, 53, 56, 54, 49, 63, 56, 55, 65, 43, 53, 36, 38, 51, 39, 24, 27, 26, 45, 44, 46, 38, 30, 38, 52, 49, 37, 60, 35, 44, 27, 18, 46, 38, 56, 52, 46, 37, 89, 34, 63, 67, 51, 25, 40, 46, 29, 36, 49, 40, 30, 24, 43, 63, 53, 35, 57, 54, 58, 78, 63, 74, 27, 65, 65, 72, 62, 89, 88, 86, 88, 73, 90, 70, 69, 101, 66, 46, 54, 27, 44, 78, 85, 79, 47, 80, 102, 120, 160, 195, 91, 168, 198, 190, 170, 181, 210, 154, 166, 181, 143, 139, 197, 224, 217, 216, 227, 224, 218, 220, 215, 216, 217, 219, 220, 220, 219, 219, 219, 219, 219, 219, 219, 220, 221, 220, 220, 220, 218, 217, 224, 214, 211, 218, 220, 219, 223, 218, 208, 216, 212, 141, 94, 228, 232, 220, 214, 218, 223, 222, 218, 214, 219, 221, 215, 219, 218, 201, 213, 199, 134, 154, 203, 214, 219, 215, 228, 222, 214, 221, 221, 202, 202, 174, 225, 210, 218, 219, 220, 220, 219, 218, 217, 215, 215, 219, 219, 219, 219, 219, 219, 219, 219, 219, 219, 51, 155, 124, 129, 115, 169, 179, 201, 201, 182, 166, 190, 209, 202, 210, 210, 211, 214, 214, 212, 218, 214, 188, 193, 148, 77, 79, 94, 126, 80, 92, 75, 62, 41, 127, 26, 72, 102, 159, 108, 71, 60, 66, 72, 64, 59, 42, 50, 62, 48, 61, 66, 56, 55, 52, 57, 45, 59, 35, 60, 54, 32, 37, 39, 41, 41, 43, 20, 38, 57, 33, 47, 33, 35, 40, 42, 16, 27, 34, 52, 42, 44, 29, 35, 49, 39, 36, 22, 66, 59, 58, 20, 57, 33, 32, 42, 41, 50, 68, 41, 29, 35, 52, 43, 47, 44, 33, 25, 42, 63, 43, 30, 45, 43, 53, 42, 51, 20, 44, 52, 24, 74, 65, 15, 45, 72, 70, 53, 78, 60, 80, 57, 88, 58, 55, 77, 58, 81, 31, 36, 76, 64, 142, 180, 181, 93, 101, 116, 96, 94, 139, 183, 188, 221, 192, 146, 205, 158, 189, 185, 225, 158, 187, 217, 220, 205, 214, 228, 210, 204, 220, 217, 217, 217, 217, 217, 217, 217, 218, 218, 218, 218, 218, 218, 219, 221, 221, 219, 217, 217, 220, 221, 224, 223, 219, 218, 216, 209, 202, 143, 179, 211, 214, 186, 212, 223, 220, 217, 215, 218, 222, 225, 226, 224, 220, 211, 217, 219, 219, 145, 153, 154, 166, 228, 209, 208, 202, 215, 214, 226, 226, 179, 130, 141, 234, 221, 231, 211, 217, 218, 218, 219, 219, 219, 218, 217, 218, 218, 218, 218, 218, 218, 218, 218, 218, 218, 153, 93, 86, 117, 152, 128, 207, 207, 210, 194, 165, 175, 203, 206, 210, 208, 208, 210, 213, 215, 210, 208, 218, 156, 104, 82, 114, 113, 99, 214, 146, 143, 126, 124, 117, 13, 10, 78, 85, 85, 55, 68, 56, 53, 66, 69, 72, 58, 72, 73, 56, 67, 62, 63, 45, 52, 58, 56, 64, 48, 55, 59, 51, 32, 38, 33, 42, 48, 41, 40, 60, 38, 44, 37, 45, 37, 37, 13, 31, 34, 46, 31, 34, 43, 28, 39, 43, 57, 35, 47, 68, 57, 31, 96, 26, 43, 47, 43, 48, 29, 50, 54, 21, 41, 43, 54, 42, 39, 39, 27, 50, 44, 27, 44, 39, 35, 34, 43, 38, 41, 64, 57, 65, 37, 68, 57, 66, 60, 74, 72, 54, 57, 72, 45, 64, 47, 59, 57, 51, 50, 29, 29, 83, 101, 123, 141, 173, 164, 135, 79, 91, 128, 137, 162, 158, 148, 201, 225, 182, 154, 228, 148, 202, 174, 219, 223, 226, 229, 224, 202, 197, 211, 219, 219, 218, 218, 217, 217, 217, 218, 218, 218, 218, 218, 218, 217, 220, 220, 216, 214, 218, 227, 211, 227, 228, 215, 213, 216, 210, 225, 174, 229, 218, 210, 179, 186, 172, 202, 225, 226, 216, 214, 217, 218, 215, 215, 214, 220, 216, 208, 190, 196, 218, 188, 210, 223, 227, 206, 211, 213, 228, 213, 137, 124, 86, 219, 221, 214, 227, 212, 217, 218, 220, 221, 221, 220, 219, 218, 218, 218, 218, 218, 218, 218, 218, 218, 218, 194, 116, 120, 86, 156, 184, 216, 210, 205, 216, 199, 177, 179, 188, 211, 207, 204, 207, 213, 217, 217, 206, 210, 206, 155, 109, 171, 123, 185, 198, 90, 88, 73, 140, 89, 17, 52, 71, 52, 52, 72, 73, 57, 59, 61, 71, 51, 52, 59, 47, 60, 49, 54, 51, 49, 58, 55, 67, 41, 47, 48, 52, 40, 45, 41, 43, 46, 33, 17, 49, 30, 29, 32, 51, 36, 35, 16, 36, 30, 38, 23, 29, 34, 28, 42, 51, 60, 61, 43, 40, 51, 50, 72, 42, 60, 50, 41, 44, 37, 39, 43, 52, 50, 35, 44, 40, 33, 34, 30, 31, 40, 21, 26, 39, 32, 41, 48, 39, 55, 50, 57, 68, 55, 61, 58, 49, 61, 67, 65, 59, 63, 64, 76, 39, 64, 51, 45, 29, 41, 58, 47, 50, 109, 162, 130, 101, 95, 85, 66, 76, 104, 97, 120, 126, 136, 213, 235, 162, 216, 217, 168, 217, 172, 235, 187, 225, 227, 212, 212, 217, 216, 219, 219, 219, 218, 218, 218, 218, 218, 218, 218, 218, 218, 218, 217, 219, 219, 213, 211, 219, 233, 216, 201, 203, 217, 219, 219, 229, 211, 135, 187, 214, 203, 197, 182, 207, 216, 222, 219, 215, 216, 219, 217, 213, 215, 215, 212, 194, 169, 203, 217, 174, 135, 179, 211, 227, 208, 216, 219, 227, 223, 177, 147, 140, 219, 217, 229, 219, 219, 218, 220, 221, 222, 221, 219, 218, 218, 218, 218, 218, 218, 218, 218, 218, 218, 218, 170, 159, 178, 144, 199, 199, 215, 213, 206, 214, 178, 164, 153, 194, 211, 215, 209, 209, 210, 207, 216, 203, 223, 202, 178, 128, 198, 187, 213, 213, 65, 57, 49, 100, 47, 49, 56, 62, 39, 47, 63, 76, 63, 55, 55, 67, 57, 48, 50, 47, 51, 46, 45, 50, 53, 62, 46, 58, 46, 45, 50, 48, 43, 42, 44, 46, 41, 30, 21, 53, 29, 23, 27, 46, 38, 40, 13, 37, 31, 33, 20, 34, 35, 29, 32, 48, 38, 68, 46, 32, 41, 65, 50, 55, 69, 46, 42, 51, 51, 33, 36, 45, 43, 37, 36, 37, 40, 32, 27, 22, 45, 29, 24, 33, 35, 38, 40, 35, 48, 41, 47, 54, 53, 52, 56, 41, 65, 60, 62, 59, 55, 56, 62, 44, 52, 52, 43, 48, 55, 73, 50, 69, 102, 119, 94, 59, 51, 59, 51, 74, 60, 68, 98, 99, 117, 191, 200, 185, 218, 188, 176, 199, 190, 229, 147, 218, 212, 213, 215, 217, 215, 218, 218, 217, 217, 218, 218, 219, 219, 219, 219, 218, 218, 218, 217, 216, 224, 220, 220, 217, 211, 221, 168, 195, 216, 223, 218, 214, 208, 170, 203, 212, 214, 192, 188, 211, 221, 215, 215, 210, 210, 222, 217, 210, 221, 209, 224, 216, 195, 171, 165, 160, 151, 202, 217, 209, 180, 230, 225, 212, 214, 213, 191, 135, 191, 206, 219, 218, 219, 217, 218, 219, 220, 219, 218, 217, 219, 219, 218, 218, 217, 217, 217, 217, 217, 217, 154, 188, 211, 205, 221, 201, 214, 210, 209, 211, 166, 147, 148, 197, 204, 217, 211, 209, 208, 206, 208, 195, 221, 205, 189, 175, 214, 201, 161, 175, 69, 54, 54, 54, 42, 80, 80, 66, 45, 44, 55, 69, 64, 56, 56, 65, 66, 56, 48, 53, 48, 48, 44, 45, 52, 62, 40, 49, 57, 48, 53, 45, 41, 37, 45, 55, 47, 42, 29, 55, 30, 25, 23, 36, 37, 43, 13, 36, 30, 30, 21, 36, 39, 32, 30, 42, 33, 53, 50, 48, 41, 63, 38, 66, 63, 43, 46, 54, 52, 30, 34, 33, 37, 38, 32, 32, 49, 34, 24, 21, 48, 38, 30, 33, 43, 40, 42, 43, 44, 47, 48, 46, 45, 50, 51, 39, 67, 57, 69, 58, 42, 44, 47, 37, 44, 44, 46, 65, 72, 77, 44, 78, 86, 62, 59, 56, 37, 52, 50, 81, 82, 53, 89, 89, 100, 136, 161, 205, 173, 173, 193, 190, 199, 230, 148, 179, 204, 216, 217, 212, 216, 217, 217, 216, 216, 217, 217, 217, 216, 216, 216, 217, 217, 218, 214, 218, 212, 225, 217, 211, 205, 222, 150, 198, 214, 217, 216, 216, 216, 184, 187, 205, 180, 133, 186, 217, 223, 217, 213, 220, 207, 224, 221, 210, 221, 212, 211, 202, 210, 136, 118, 136, 180, 209, 219, 207, 185, 207, 212, 206, 217, 225, 203, 123, 170, 208, 210, 218, 214, 216, 217, 217, 218, 217, 217, 216, 219, 219, 218, 218, 217, 217, 217, 217, 217, 217, 160, 202, 210, 210, 201, 217, 212, 208, 210, 214, 196, 147, 159, 187, 200, 209, 205, 207, 210, 215, 204, 182, 194, 230, 211, 225, 219, 149, 102, 93, 69, 56, 51, 41, 74, 83, 92, 74, 65, 55, 61, 63, 64, 61, 58, 61, 65, 63, 47, 57, 50, 50, 51, 44, 45, 56, 43, 46, 61, 50, 46, 40, 38, 34, 45, 62, 59, 57, 29, 46, 27, 30, 27, 32, 31, 38, 18, 38, 24, 27, 22, 30, 35, 36, 42, 35, 56, 26, 48, 67, 52, 45, 30, 74, 49, 48, 52, 44, 44, 29, 36, 42, 43, 32, 32, 27, 49, 37, 30, 22, 45, 40, 39, 44, 53, 55, 65, 61, 59, 60, 60, 56, 51, 50, 48, 39, 65, 55, 83, 61, 38, 32, 54, 18, 51, 36, 45, 59, 69, 62, 50, 71, 91, 57, 50, 55, 28, 49, 74, 87, 152, 60, 79, 93, 103, 99, 151, 170, 140, 175, 225, 207, 194, 230, 186, 142, 200, 215, 219, 209, 222, 217, 217, 216, 216, 217, 217, 215, 213, 214, 215, 216, 217, 217, 215, 221, 200, 220, 205, 211, 225, 226, 164, 202, 218, 207, 215, 238, 216, 142, 132, 202, 127, 95, 169, 238, 226, 226, 216, 236, 214, 221, 222, 214, 218, 221, 180, 160, 191, 146, 142, 98, 171, 187, 205, 220, 224, 161, 193, 197, 230, 225, 169, 169, 184, 223, 217, 216, 214, 216, 217, 217, 218, 217, 217, 217, 219, 219, 218, 218, 217, 217, 217, 217, 217, 217, 113, 214, 215, 216, 206, 205, 198, 229, 212, 200, 205, 177, 149, 193, 217, 209, 204, 214, 212, 203, 216, 173, 192, 176, 220, 185, 183, 153, 126, 148, 63, 61, 33, 55, 67, 49, 72, 65, 77, 69, 74, 59, 62, 61, 54, 49, 58, 66, 46, 60, 53, 52, 54, 41, 42, 56, 50, 42, 59, 47, 35, 34, 35, 29, 37, 54, 53, 52, 43, 47, 24, 40, 47, 40, 26, 35, 23, 37, 20, 24, 23, 24, 25, 30, 40, 22, 61, 6, 39, 65, 56, 27, 32, 65, 37, 55, 58, 37, 42, 40, 46, 42, 41, 29, 40, 25, 45, 35, 39, 31, 49, 46, 53, 56, 63, 69, 80, 74, 69, 69, 70, 65, 57, 54, 54, 46, 54, 42, 83, 58, 35, 40, 35, 53, 31, 61, 41, 64, 63, 13, 10, 70, 145, 128, 62, 47, 30, 30, 67, 123, 95, 125, 103, 67, 83, 126, 157, 158, 104, 155, 169, 220, 221, 203, 178, 206, 202, 173, 221, 212, 197, 218, 217, 216, 216, 216, 216, 217, 219, 221, 220, 220, 220, 219, 218, 234, 205, 238, 212, 224, 226, 211, 235, 204, 210, 222, 214, 210, 198, 195, 164, 193, 228, 190, 220, 146, 214, 211, 228, 230, 218, 219, 212, 204, 215, 226, 208, 205, 221, 222, 203, 211, 139, 164, 229, 200, 204, 207, 184, 205, 139, 187, 224, 137, 240, 217, 221, 215, 224, 222, 216, 217, 217, 218, 217, 217, 216, 219, 219, 218, 218, 217, 217, 217, 217, 217, 217, 82, 186, 217, 210, 224, 208, 220, 211, 206, 197, 159, 192, 101, 204, 207, 203, 206, 221, 216, 206, 201, 192, 190, 174, 209, 204, 187, 91, 75, 173, 75, 94, 37, 74, 70, 46, 61, 63, 74, 68, 71, 62, 61, 60, 51, 39, 49, 63, 46, 58, 54, 53, 49, 36, 42, 52, 56, 38, 51, 46, 35, 40, 44, 36, 38, 49, 47, 48, 48, 43, 19, 35, 43, 35, 25, 39, 24, 33, 20, 23, 23, 20, 23, 28, 33, 23, 49, 22, 37, 39, 50, 24, 45, 33, 27, 51, 54, 47, 50, 46, 44, 29, 35, 29, 54, 29, 38, 32, 48, 48, 61, 57, 67, 65, 66, 74, 76, 72, 69, 70, 71, 69, 66, 62, 70, 58, 36, 31, 69, 42, 44, 31, 41, 21, 30, 42, 44, 50, 52, 109, 155, 133, 71, 52, 54, 27, 66, 146, 184, 106, 162, 165, 79, 135, 103, 109, 158, 165, 207, 229, 203, 179, 225, 210, 212, 212, 198, 200, 212, 225, 217, 217, 216, 215, 215, 216, 217, 218, 218, 217, 216, 216, 215, 214, 219, 196, 199, 222, 203, 224, 159, 147, 146, 134, 180, 209, 223, 204, 245, 211, 191, 210, 237, 231, 111, 159, 195, 225, 232, 212, 219, 216, 233, 235, 196, 195, 233, 213, 159, 127, 183, 237, 207, 203, 219, 195, 202, 199, 169, 143, 121, 172, 105, 238, 213, 204, 203, 220, 220, 216, 217, 217, 218, 217, 217, 216, 219, 219, 218, 218, 217, 217, 217, 217, 217, 217, 85, 90, 183, 213, 215, 199, 206, 211, 209, 218, 178, 191, 138, 185, 191, 209, 213, 211, 204, 210, 213, 148, 167, 226, 135, 128, 119, 77, 100, 65, 71, 74, 49, 48, 69, 62, 59, 65, 62, 61, 62, 63, 61, 62, 56, 43, 44, 53, 45, 52, 53, 52, 39, 33, 41, 39, 56, 40, 48, 51, 42, 40, 40, 35, 35, 41, 40, 46, 41, 43, 30, 31, 27, 28, 45, 46, 21, 27, 23, 23, 22, 21, 18, 24, 23, 26, 30, 37, 34, 30, 39, 34, 50, 14, 19, 40, 44, 59, 48, 33, 33, 23, 35, 29, 54, 32, 42, 39, 54, 58, 70, 63, 71, 66, 63, 69, 64, 65, 67, 66, 66, 67, 69, 68, 77, 64, 33, 52, 69, 31, 34, 29, 38, 33, 31, 52, 48, 37, 56, 79, 116, 112, 69, 39, 75, 32, 46, 168, 153, 164, 123, 92, 105, 137, 119, 83, 124, 184, 209, 204, 181, 208, 211, 220, 219, 212, 205, 212, 214, 227, 215, 217, 215, 215, 215, 215, 216, 216, 215, 215, 216, 217, 217, 218, 218, 218, 215, 213, 231, 204, 206, 131, 144, 130, 196, 210, 219, 228, 206, 192, 167, 200, 215, 207, 134, 114, 184, 219, 201, 220, 228, 221, 220, 210, 233, 213, 200, 206, 156, 159, 198, 179, 183, 208, 222, 195, 220, 207, 111, 162, 157, 115, 140, 209, 211, 225, 219, 212, 212, 216, 217, 217, 218, 217, 217, 217, 219, 219, 218, 218, 217, 217, 217, 217, 217, 217, 70, 124, 207, 203, 208, 225, 190, 208, 212, 195, 205, 195, 136, 167, 194, 217, 215, 204, 199, 208, 204, 151, 149, 204, 78, 81, 77, 67, 75, 109, 108, 75, 53, 58, 63, 70, 57, 65, 56, 58, 58, 54, 55, 60, 59, 47, 41, 42, 45, 45, 49, 52, 36, 33, 41, 33, 57, 46, 44, 52, 43, 37, 37, 32, 31, 35, 31, 37, 36, 40, 34, 27, 22, 30, 58, 48, 20, 23, 25, 21, 24, 23, 16, 22, 22, 31, 22, 39, 34, 38, 31, 39, 46, 22, 23, 43, 42, 52, 31, 30, 41, 30, 39, 28, 45, 34, 53, 54, 56, 59, 71, 61, 68, 63, 59, 63, 56, 63, 67, 65, 62, 64, 69, 69, 71, 65, 43, 83, 79, 35, 29, 36, 47, 56, 47, 67, 56, 50, 46, 76, 102, 121, 90, 66, 110, 37, 70, 170, 164, 148, 95, 42, 72, 132, 148, 87, 118, 170, 171, 190, 205, 204, 204, 218, 220, 214, 210, 212, 230, 206, 215, 216, 215, 215, 215, 215, 216, 217, 218, 217, 216, 216, 215, 215, 217, 215, 224, 211, 222, 209, 230, 169, 190, 151, 201, 205, 210, 222, 205, 175, 142, 181, 197, 230, 137, 184, 205, 223, 215, 226, 224, 213, 216, 216, 202, 135, 194, 203, 201, 191, 170, 123, 138, 202, 203, 196, 216, 195, 126, 168, 170, 139, 146, 167, 192, 218, 223, 220, 225, 216, 217, 217, 218, 217, 217, 216, 219, 219, 218, 218, 217, 217, 217, 217, 217, 217, 99, 173, 209, 203, 203, 230, 191, 206, 214, 203, 195, 202, 138, 159, 194, 213, 209, 207, 209, 209, 203, 167, 121, 153, 55, 58, 66, 61, 47, 147, 131, 90, 58, 63, 66, 76, 62, 66, 59, 57, 52, 46, 49, 53, 54, 48, 39, 35, 43, 39, 43, 51, 40, 36, 42, 37, 56, 49, 35, 49, 40, 37, 41, 33, 33, 37, 30, 31, 30, 31, 26, 20, 24, 32, 52, 41, 21, 22, 22, 18, 26, 24, 21, 23, 28, 36, 28, 36, 42, 53, 37, 36, 39, 37, 31, 48, 44, 42, 19, 42, 59, 43, 42, 28, 38, 39, 60, 64, 57, 56, 68, 57, 62, 60, 58, 60, 54, 62, 67, 65, 61, 62, 65, 66, 63, 63, 55, 94, 82, 46, 37, 48, 55, 63, 49, 60, 53, 60, 51, 55, 109, 101, 93, 74, 137, 86, 60, 149, 150, 103, 62, 42, 71, 149, 179, 127, 129, 164, 184, 194, 229, 212, 221, 208, 212, 208, 208, 220, 222, 203, 223, 216, 215, 215, 214, 215, 216, 217, 217, 216, 214, 211, 209, 208, 213, 213, 220, 213, 210, 222, 224, 182, 195, 126, 161, 188, 214, 220, 205, 185, 150, 188, 197, 229, 132, 223, 219, 224, 226, 202, 222, 221, 220, 211, 167, 137, 206, 198, 218, 161, 133, 123, 151, 207, 205, 196, 202, 186, 149, 159, 188, 158, 169, 181, 200, 209, 214, 219, 224, 216, 217, 217, 218, 217, 217, 216, 219, 219, 218, 218, 217, 217, 217, 217, 217, 217, 141, 185, 196, 211, 194, 211, 206, 196, 213, 226, 182, 195, 162, 152, 181, 203, 202, 212, 220, 210, 201, 157, 85, 105, 59, 55, 70, 51, 49, 113, 111, 92, 57, 51, 69, 71, 66, 62, 66, 55, 46, 47, 49, 45, 43, 44, 42, 36, 42, 37, 37, 51, 51, 42, 43, 46, 52, 45, 22, 45, 39, 39, 43, 33, 35, 43, 34, 28, 25, 25, 23, 18, 27, 30, 39, 30, 24, 24, 17, 14, 30, 25, 24, 20, 30, 33, 34, 29, 51, 70, 57, 26, 33, 42, 35, 44, 40, 41, 23, 57, 68, 55, 43, 30, 39, 47, 59, 65, 57, 53, 67, 55, 57, 58, 60, 60, 55, 60, 65, 65, 62, 60, 59, 62, 57, 64, 60, 77, 68, 55, 47, 53, 56, 49, 44, 41, 44, 47, 60, 28, 105, 83, 108, 73, 114, 131, 65, 129, 111, 74, 32, 73, 118, 150, 168, 172, 171, 150, 212, 209, 224, 225, 229, 203, 207, 203, 205, 225, 205, 215, 225, 215, 215, 214, 214, 215, 215, 216, 215, 215, 214, 213, 212, 212, 212, 216, 212, 218, 210, 224, 211, 175, 169, 92, 128, 182, 222, 220, 205, 200, 160, 184, 192, 175, 120, 215, 222, 216, 220, 194, 222, 220, 214, 195, 147, 183, 198, 184, 209, 120, 127, 138, 203, 219, 220, 206, 200, 170, 141, 154, 192, 142, 202, 223, 220, 214, 211, 212, 214, 216, 217, 217, 218, 217, 217, 217, 219, 219, 218, 218, 217, 217, 217, 217, 217, 217, 127, 188, 220, 212, 187, 209, 212, 168, 210, 203, 211, 162, 178, 140, 178, 202, 203, 208, 213, 204, 170, 118, 55, 63, 71, 76, 69, 34, 78, 65, 69, 67, 42, 46, 56, 51, 54, 50, 70, 54, 43, 55, 54, 41, 34, 43, 49, 44, 43, 38, 35, 52, 59, 46, 44, 49, 44, 37, 13, 44, 44, 38, 35, 24, 28, 41, 33, 24, 23, 31, 36, 27, 31, 30, 37, 22, 26, 26, 12, 12, 29, 24, 19, 8, 18, 25, 30, 14, 47, 79, 86, 27, 29, 36, 28, 28, 28, 53, 45, 60, 58, 57, 43, 33, 47, 55, 53, 58, 56, 53, 66, 55, 55, 57, 61, 60, 53, 57, 61, 62, 62, 59, 57, 60, 58, 66, 56, 47, 47, 53, 46, 44, 53, 31, 52, 39, 41, 20, 45, 42, 68, 123, 160, 102, 52, 96, 159, 132, 99, 68, 27, 101, 147, 99, 100, 175, 234, 111, 170, 218, 198, 205, 199, 213, 220, 215, 209, 209, 217, 216, 209, 215, 215, 216, 216, 216, 216, 217, 218, 220, 223, 225, 226, 227, 221, 210, 211, 223, 212, 215, 210, 198, 179, 125, 168, 201, 217, 205, 222, 191, 132, 132, 165, 115, 102, 230, 228, 207, 220, 251, 213, 190, 193, 196, 116, 142, 161, 163, 211, 142, 147, 108, 212, 221, 213, 224, 213, 135, 126, 171, 158, 125, 187, 214, 212, 227, 222, 213, 218, 216, 217, 217, 218, 217, 217, 217, 219, 219, 218, 218, 217, 217, 217, 217, 217, 217, 144, 183, 211, 202, 225, 209, 184, 132, 186, 185, 211, 142, 130, 143, 235, 211, 207, 207, 204, 221, 151, 99, 57, 39, 69, 79, 61, 52, 105, 56, 70, 58, 46, 43, 45, 53, 31, 42, 64, 50, 34, 53, 55, 42, 36, 52, 61, 50, 50, 47, 46, 55, 53, 49, 54, 42, 36, 40, 22, 34, 39, 33, 33, 29, 29, 31, 30, 27, 27, 31, 32, 27, 27, 30, 30, 23, 21, 25, 13, 25, 11, 19, 21, 26, 18, 65, 56, 8, 25, 60, 115, 72, 24, 46, 5, 20, 16, 74, 72, 42, 35, 39, 43, 42, 49, 58, 57, 52, 55, 58, 57, 56, 55, 54, 56, 57, 55, 60, 60, 55, 57, 62, 65, 61, 60, 57, 51, 46, 45, 46, 43, 41, 41, 42, 42, 40, 44, 26, 49, 49, 28, 86, 92, 108, 125, 70, 130, 85, 97, 51, 31, 100, 91, 96, 117, 125, 149, 190, 163, 184, 204, 205, 201, 214, 229, 226, 227, 228, 221, 216, 212, 210, 218, 225, 227, 224, 222, 219, 218, 220, 216, 207, 199, 194, 205, 224, 231, 214, 222, 219, 207, 209, 208, 170, 192, 194, 215, 198, 210, 195, 173, 173, 179, 158, 133, 212, 209, 229, 223, 244, 191, 231, 201, 173, 105, 177, 184, 180, 124, 104, 86, 122, 131, 211, 203, 206, 209, 146, 180, 189, 228, 153, 101, 158, 203, 214, 211, 211, 217, 218, 218, 218, 218, 218, 218, 218, 219, 219, 218, 218, 217, 217, 217, 218, 218, 218, 79, 152, 203, 228, 202, 192, 168, 113, 194, 203, 200, 208, 196, 135, 149, 205, 205, 210, 200, 153, 116, 125, 26, 62, 50, 57, 49, 95, 90, 106, 64, 55, 63, 60, 55, 65, 54, 49, 52, 48, 46, 60, 49, 45, 49, 52, 48, 44, 44, 48, 43, 43, 42, 50, 56, 33, 31, 47, 33, 33, 35, 30, 29, 26, 24, 25, 25, 24, 26, 29, 29, 25, 26, 28, 25, 28, 16, 25, 22, 17, 46, 19, 12, 16, 38, 34, 14, 42, 24, 41, 49, 44, 8, 33, 41, 42, 29, 56, 61, 33, 45, 38, 53, 53, 52, 58, 60, 56, 55, 58, 58, 56, 55, 54, 55, 56, 55, 57, 57, 56, 59, 59, 55, 53, 51, 47, 44, 41, 39, 40, 40, 38, 40, 42, 43, 42, 41, 45, 45, 41, 30, 50, 105, 199, 103, 80, 121, 90, 108, 45, 78, 108, 92, 74, 84, 185, 179, 170, 192, 202, 209, 221, 204, 211, 206, 204, 207, 214, 219, 224, 227, 224, 219, 211, 206, 206, 210, 213, 209, 203, 205, 215, 223, 224, 220, 217, 219, 214, 221, 215, 216, 232, 215, 200, 198, 214, 231, 230, 210, 219, 198, 202, 225, 199, 126, 197, 197, 211, 215, 205, 177, 210, 195, 182, 144, 173, 193, 203, 112, 120, 123, 145, 158, 204, 208, 221, 227, 181, 197, 220, 209, 148, 199, 198, 213, 215, 209, 216, 220, 217, 217, 217, 217, 217, 217, 218, 219, 219, 218, 218, 217, 217, 217, 217, 217, 217, 93, 67, 127, 186, 213, 192, 195, 108, 181, 206, 197, 193, 173, 152, 154, 190, 204, 216, 215, 139, 99, 71, 38, 72, 40, 81, 68, 128, 109, 88, 70, 48, 53, 58, 53, 60, 61, 48, 40, 46, 53, 56, 48, 44, 38, 31, 37, 51, 55, 46, 28, 28, 40, 50, 51, 26, 25, 48, 38, 30, 32, 29, 27, 25, 22, 22, 23, 24, 29, 31, 29, 27, 29, 29, 23, 26, 24, 20, 45, 41, 37, 6, 43, 38, 44, 35, 16, 17, 30, 31, 28, 25, 35, 12, 45, 41, 34, 38, 63, 43, 71, 45, 61, 60, 52, 57, 63, 60, 56, 59, 59, 56, 54, 54, 54, 55, 56, 55, 53, 56, 61, 55, 45, 42, 38, 35, 34, 34, 32, 32, 34, 33, 35, 38, 39, 39, 36, 53, 31, 39, 42, 35, 93, 142, 68, 78, 168, 80, 86, 56, 48, 79, 62, 86, 141, 168, 214, 211, 210, 220, 209, 211, 201, 205, 214, 215, 222, 228, 227, 225, 225, 225, 226, 226, 227, 228, 231, 233, 233, 229, 220, 212, 214, 222, 227, 215, 213, 218, 225, 212, 216, 229, 171, 159, 164, 209, 206, 215, 212, 197, 181, 181, 216, 231, 166, 129, 144, 202, 226, 210, 194, 164, 181, 190, 147, 157, 192, 209, 152, 152, 193, 171, 192, 207, 211, 217, 228, 157, 173, 221, 193, 180, 219, 229, 213, 207, 219, 218, 212, 216, 216, 216, 216, 216, 216, 217, 219, 219, 218, 218, 217, 217, 217, 217, 217, 217, 87, 38, 80, 140, 207, 202, 200, 125, 168, 200, 212, 186, 166, 132, 192, 208, 220, 196, 210, 156, 115, 53, 58, 45, 67, 132, 107, 144, 141, 61, 70, 58, 43, 55, 52, 49, 55, 47, 36, 45, 51, 44, 49, 40, 23, 19, 33, 49, 61, 46, 21, 24, 43, 49, 45, 25, 21, 39, 33, 27, 32, 28, 26, 27, 25, 23, 24, 28, 30, 30, 29, 28, 31, 30, 21, 22, 35, 18, 33, 41, 96, 18, 46, 24, 39, 29, 39, 32, 25, 40, 35, 25, 37, 9, 33, 40, 34, 27, 65, 56, 91, 55, 63, 60, 50, 54, 62, 62, 57, 60, 59, 56, 54, 54, 54, 55, 57, 55, 53, 55, 59, 52, 40, 37, 32, 30, 32, 34, 31, 29, 32, 31, 32, 34, 35, 34, 33, 49, 22, 44, 43, 38, 66, 79, 65, 77, 109, 55, 56, 39, 48, 65, 65, 95, 162, 181, 211, 213, 216, 211, 201, 218, 226, 220, 230, 227, 226, 219, 201, 184, 173, 161, 156, 151, 151, 159, 170, 179, 187, 197, 210, 220, 222, 220, 220, 215, 220, 221, 222, 211, 219, 213, 125, 121, 150, 218, 201, 215, 216, 199, 150, 150, 201, 223, 171, 129, 153, 210, 218, 208, 225, 171, 170, 177, 113, 185, 198, 217, 184, 191, 208, 154, 211, 210, 222, 189, 233, 166, 179, 161, 139, 189, 214, 211, 213, 216, 217, 216, 209, 215, 215, 215, 215, 215, 215, 216, 219, 219, 218, 218, 217, 217, 217, 216, 216, 216, 58, 55, 79, 97, 175, 206, 180, 141, 167, 193, 217, 200, 185, 125, 188, 211, 221, 180, 195, 182, 144, 81, 74, 41, 109, 169, 148, 134, 168, 49, 60, 71, 47, 55, 57, 48, 51, 49, 39, 44, 44, 37, 45, 37, 24, 27, 33, 33, 48, 48, 31, 31, 43, 44, 39, 25, 21, 27, 24, 26, 30, 25, 23, 27, 28, 26, 26, 30, 27, 26, 25, 26, 30, 29, 20, 23, 31, 23, 26, 44, 125, 31, 34, 19, 32, 27, 37, 60, 22, 45, 40, 32, 18, 16, 26, 38, 34, 24, 55, 58, 91, 62, 61, 55, 49, 52, 59, 61, 58, 60, 59, 57, 55, 54, 54, 55, 58, 57, 55, 54, 56, 51, 42, 41, 36, 34, 38, 40, 37, 34, 35, 34, 33, 34, 34, 32, 34, 41, 26, 48, 28, 44, 44, 50, 64, 77, 52, 47, 43, 42, 60, 71, 81, 94, 129, 174, 160, 170, 172, 164, 163, 187, 192, 188, 188, 181, 173, 161, 141, 123, 110, 93, 85, 77, 73, 80, 90, 105, 117, 130, 154, 180, 199, 206, 213, 221, 225, 209, 213, 215, 224, 207, 131, 139, 160, 219, 204, 226, 212, 207, 155, 162, 203, 220, 164, 170, 200, 219, 209, 195, 221, 194, 180, 167, 116, 196, 186, 207, 191, 191, 178, 112, 181, 196, 219, 190, 189, 180, 189, 121, 105, 194, 206, 205, 217, 221, 215, 215, 211, 215, 215, 215, 215, 215, 215, 216, 219, 219, 218, 218, 217, 217, 217, 216, 216, 216, 42, 65, 82, 64, 130, 197, 147, 142, 167, 187, 205, 202, 203, 165, 143, 184, 203, 200, 185, 190, 154, 113, 87, 105, 141, 173, 168, 113, 178, 52, 49, 68, 60, 56, 60, 55, 55, 53, 42, 41, 39, 42, 39, 37, 41, 44, 32, 16, 31, 50, 44, 37, 37, 37, 35, 25, 23, 18, 18, 26, 27, 18, 18, 24, 26, 26, 26, 28, 21, 20, 19, 21, 26, 26, 18, 28, 16, 28, 52, 80, 83, 25, 34, 49, 28, 34, 25, 46, 37, 31, 27, 28, 14, 18, 28, 32, 34, 25, 39, 49, 73, 62, 57, 51, 53, 54, 56, 58, 56, 59, 59, 56, 55, 54, 55, 55, 59, 61, 58, 53, 52, 52, 49, 51, 46, 44, 47, 49, 47, 42, 40, 38, 37, 38, 38, 36, 38, 38, 39, 48, 14, 41, 37, 43, 43, 75, 83, 66, 56, 79, 51, 73, 80, 87, 83, 102, 95, 113, 92, 103, 101, 102, 83, 96, 93, 86, 83, 82, 79, 79, 80, 77, 80, 81, 78, 74, 72, 78, 85, 83, 80, 90, 121, 157, 189, 214, 221, 197, 209, 221, 222, 218, 185, 183, 162, 194, 200, 224, 205, 198, 189, 189, 203, 235, 160, 195, 225, 213, 221, 192, 181, 191, 200, 166, 166, 158, 151, 179, 190, 143, 135, 92, 129, 183, 199, 222, 120, 168, 172, 163, 138, 210, 206, 234, 221, 211, 221, 217, 215, 215, 215, 215, 215, 215, 215, 216, 219, 219, 218, 218, 217, 217, 217, 216, 216, 216, 69, 42, 44, 75, 88, 191, 113, 154, 127, 174, 216, 153, 214, 176, 170, 231, 223, 224, 168, 152, 124, 127, 104, 184, 173, 173, 159, 127, 151, 67, 58, 52, 56, 54, 51, 57, 57, 49, 37, 36, 39, 54, 38, 40, 47, 37, 26, 30, 41, 46, 35, 31, 31, 28, 26, 23, 25, 18, 20, 26, 21, 13, 14, 19, 22, 22, 22, 22, 18, 19, 19, 20, 25, 26, 20, 28, 20, 23, 46, 104, 155, 17, 31, 30, 27, 6, 89, 6, 71, 22, 19, 6, 44, 9, 24, 22, 28, 31, 38, 51, 60, 58, 55, 54, 60, 57, 55, 55, 54, 58, 57, 56, 55, 54, 56, 57, 58, 63, 60, 52, 50, 54, 57, 56, 52, 50, 51, 53, 51, 46, 41, 39, 39, 41, 41, 40, 40, 39, 42, 44, 30, 39, 34, 44, 48, 74, 63, 63, 72, 60, 65, 49, 72, 69, 62, 62, 86, 62, 85, 83, 77, 77, 67, 76, 78, 71, 69, 69, 64, 63, 67, 69, 65, 61, 62, 71, 82, 79, 66, 60, 67, 82, 86, 78, 84, 149, 221, 226, 227, 219, 209, 223, 198, 134, 119, 192, 221, 212, 217, 213, 156, 96, 145, 183, 101, 215, 213, 201, 228, 219, 193, 200, 171, 139, 147, 156, 160, 184, 210, 120, 76, 135, 180, 223, 201, 187, 198, 179, 159, 231, 179, 194, 234, 204, 215, 220, 211, 219, 219, 215, 215, 215, 215, 215, 215, 216, 219, 219, 218, 218, 217, 217, 217, 217, 217, 217, 164, 46, 70, 45, 124, 112, 191, 151, 97, 101, 173, 175, 136, 105, 195, 191, 88, 108, 172, 139, 130, 101, 131, 142, 198, 179, 164, 161, 91, 101, 65, 65, 43, 51, 49, 57, 57, 42, 37, 37, 37, 54, 44, 41, 33, 19, 29, 56, 59, 38, 18, 25, 31, 24, 21, 22, 24, 21, 26, 26, 20, 19, 18, 16, 17, 19, 19, 19, 19, 22, 23, 21, 24, 26, 23, 19, 17, 22, 15, 47, 72, 28, 17, 44, 64, 20, 30, 48, 105, 48, 22, 3, 23, 27, 31, 35, 32, 43, 54, 62, 61, 55, 55, 57, 62, 57, 54, 55, 54, 56, 56, 55, 54, 55, 56, 58, 57, 62, 60, 53, 52, 56, 59, 57, 55, 52, 51, 50, 49, 47, 43, 41, 40, 41, 41, 38, 38, 39, 36, 40, 45, 41, 32, 34, 42, 57, 73, 69, 67, 61, 54, 89, 53, 65, 63, 70, 53, 67, 52, 71, 66, 53, 59, 74, 64, 65, 71, 75, 71, 66, 64, 65, 72, 76, 75, 70, 65, 65, 71, 78, 78, 72, 70, 73, 82, 82, 102, 145, 202, 215, 210, 224, 228, 171, 122, 170, 211, 229, 198, 208, 147, 153, 179, 100, 82, 199, 217, 220, 209, 211, 216, 207, 174, 152, 155, 125, 168, 163, 209, 163, 167, 177, 223, 203, 196, 220, 175, 182, 199, 195, 167, 207, 196, 215, 209, 208, 221, 219, 212, 216, 216, 216, 216, 216, 216, 216, 219, 219, 218, 218, 217, 217, 217, 217, 217, 217, 131, 129, 107, 131, 135, 206, 198, 179, 171, 136, 93, 138, 157, 154, 150, 151, 80, 88, 163, 124, 84, 79, 74, 140, 171, 162, 165, 160, 68, 77, 58, 73, 42, 29, 66, 70, 64, 43, 45, 42, 31, 48, 48, 40, 30, 28, 41, 53, 46, 32, 23, 32, 31, 25, 26, 24, 21, 21, 29, 24, 23, 29, 25, 19, 17, 19, 21, 21, 20, 23, 23, 19, 20, 22, 22, 25, 22, 23, 24, 18, 45, 19, 20, 25, 34, 34, 19, 54, 73, 40, 26, 30, 22, 40, 62, 41, 53, 52, 59, 58, 58, 53, 55, 57, 60, 55, 54, 56, 54, 55, 55, 54, 54, 55, 57, 59, 56, 61, 59, 54, 54, 58, 59, 62, 60, 58, 55, 52, 51, 52, 50, 48, 45, 44, 42, 39, 37, 40, 36, 36, 30, 37, 38, 36, 27, 50, 61, 57, 71, 67, 70, 54, 74, 67, 65, 61, 67, 67, 64, 68, 64, 69, 60, 67, 69, 65, 66, 69, 67, 68, 69, 69, 74, 76, 75, 73, 72, 73, 73, 69, 66, 65, 67, 69, 75, 68, 84, 101, 110, 122, 172, 234, 211, 205, 157, 194, 213, 207, 215, 209, 197, 185, 183, 200, 179, 186, 225, 208, 199, 220, 218, 206, 177, 141, 147, 117, 162, 127, 135, 103, 125, 149, 192, 221, 201, 168, 201, 202, 211, 164, 125, 166, 203, 215, 221, 217, 214, 216, 218, 216, 216, 216, 216, 216, 216, 217, 219, 219, 218, 218, 217, 217, 217, 218, 218, 218, 170, 121, 160, 187, 179, 222, 214, 188, 145, 155, 107, 120, 136, 124, 147, 142, 64, 84, 163, 107, 78, 62, 74, 129, 196, 166, 187, 151, 64, 75, 105, 73, 44, 33, 62, 66, 60, 43, 40, 45, 27, 47, 43, 35, 30, 34, 38, 38, 41, 36, 28, 30, 32, 26, 23, 24, 22, 25, 29, 24, 25, 30, 26, 22, 21, 23, 23, 19, 14, 18, 22, 19, 16, 18, 20, 21, 32, 18, 22, 14, 45, 8, 32, 31, 24, 24, 22, 27, 35, 25, 30, 24, 24, 48, 74, 57, 59, 54, 56, 53, 53, 53, 57, 60, 61, 56, 56, 59, 58, 55, 55, 56, 54, 54, 57, 61, 61, 61, 59, 55, 55, 56, 56, 57, 57, 56, 54, 53, 52, 53, 52, 52, 52, 50, 48, 45, 44, 45, 43, 42, 36, 38, 39, 37, 31, 45, 51, 53, 66, 70, 71, 55, 72, 66, 67, 65, 71, 68, 68, 65, 64, 70, 66, 68, 68, 67, 68, 70, 69, 70, 71, 72, 75, 75, 74, 73, 74, 75, 74, 71, 70, 73, 77, 79, 81, 77, 80, 80, 74, 78, 107, 141, 196, 206, 163, 174, 227, 217, 205, 201, 190, 169, 173, 238, 206, 146, 196, 214, 209, 211, 213, 209, 190, 140, 129, 128, 154, 130, 118, 94, 98, 134, 167, 211, 200, 155, 146, 183, 217, 154, 133, 178, 212, 218, 218, 219, 216, 212, 220, 215, 215, 215, 215, 215, 215, 216, 218, 218, 217, 217, 217, 217, 217, 217, 217, 217, 202, 119, 177, 206, 212, 203, 221, 190, 137, 163, 159, 90, 140, 101, 167, 156, 58, 81, 172, 91, 64, 59, 74, 130, 204, 173, 167, 135, 73, 77, 116, 72, 43, 41, 50, 51, 52, 44, 36, 46, 28, 46, 37, 32, 32, 34, 31, 29, 37, 37, 32, 30, 31, 27, 25, 28, 25, 27, 26, 23, 24, 27, 26, 24, 26, 28, 25, 18, 15, 17, 19, 17, 15, 18, 22, 26, 35, 27, 15, 19, 38, 5, 60, 43, 28, 22, 27, 12, 32, 24, 31, 16, 34, 54, 69, 63, 58, 54, 55, 53, 52, 55, 59, 62, 63, 58, 57, 59, 59, 55, 55, 56, 54, 53, 55, 59, 61, 59, 57, 55, 54, 54, 54, 53, 53, 53, 53, 53, 53, 53, 52, 54, 55, 54, 52, 50, 49, 49, 49, 49, 47, 44, 42, 39, 40, 44, 48, 53, 60, 67, 67, 65, 64, 64, 67, 69, 69, 68, 67, 65, 66, 68, 71, 73, 68, 69, 71, 72, 72, 71, 70, 72, 74, 75, 73, 72, 72, 74, 74, 75, 75, 78, 82, 84, 85, 83, 79, 76, 74, 73, 72, 75, 142, 163, 130, 165, 224, 229, 201, 201, 158, 126, 164, 226, 202, 106, 154, 215, 220, 213, 217, 215, 208, 173, 144, 181, 146, 130, 113, 103, 84, 153, 166, 203, 211, 168, 150, 174, 207, 162, 174, 203, 212, 215, 212, 218, 218, 210, 219, 215, 215, 215, 215, 215, 215, 216, 217, 217, 217, 217, 217, 217, 217, 217, 217, 217, 197, 154, 155, 210, 211, 203, 210, 192, 170, 152, 176, 73, 163, 137, 154, 141, 65, 74, 179, 80, 40, 63, 46, 130, 163, 185, 134, 121, 72, 64, 88, 99, 46, 46, 45, 35, 44, 46, 37, 44, 32, 44, 33, 32, 35, 29, 26, 31, 30, 32, 35, 33, 28, 30, 36, 34, 29, 28, 25, 21, 22, 27, 28, 26, 29, 31, 27, 20, 22, 20, 16, 14, 16, 21, 25, 36, 30, 45, 14, 25, 19, 12, 79, 44, 34, 36, 30, 20, 54, 29, 28, 21, 50, 58, 57, 54, 57, 54, 56, 56, 56, 59, 60, 62, 63, 58, 56, 57, 56, 54, 56, 55, 52, 50, 52, 55, 53, 53, 53, 52, 52, 52, 53, 54, 54, 53, 53, 53, 53, 52, 53, 54, 56, 55, 54, 51, 50, 50, 51, 51, 52, 50, 49, 45, 45, 48, 50, 53, 57, 61, 65, 65, 64, 64, 66, 67, 69, 68, 68, 68, 69, 72, 74, 75, 71, 72, 73, 73, 72, 70, 69, 70, 73, 73, 71, 70, 71, 72, 73, 73, 72, 74, 76, 78, 80, 81, 80, 80, 79, 78, 77, 85, 73, 100, 87, 174, 198, 223, 200, 200, 159, 113, 181, 209, 201, 113, 152, 205, 211, 224, 223, 217, 225, 207, 178, 233, 137, 133, 103, 99, 75, 166, 190, 209, 214, 171, 205, 179, 182, 165, 215, 213, 215, 213, 215, 216, 213, 213, 219, 216, 216, 216, 216, 216, 216, 216, 217, 217, 217, 217, 217, 217, 217, 217, 217, 217, 219, 154, 141, 210, 200, 216, 200, 192, 142, 102, 130, 120, 119, 177, 93, 66, 53, 61, 165, 76, 54, 52, 35, 98, 122, 208, 179, 122, 49, 51, 108, 164, 64, 60, 42, 24, 38, 45, 36, 40, 31, 41, 29, 32, 36, 25, 23, 33, 26, 27, 34, 33, 24, 35, 47, 41, 34, 30, 25, 20, 22, 27, 29, 28, 31, 31, 27, 21, 24, 21, 15, 15, 19, 22, 23, 32, 25, 50, 19, 27, 15, 19, 56, 34, 39, 47, 34, 22, 54, 20, 24, 28, 56, 52, 47, 48, 56, 54, 56, 56, 55, 58, 58, 61, 63, 57, 55, 55, 53, 54, 55, 54, 51, 49, 50, 52, 48, 49, 51, 52, 52, 52, 52, 55, 55, 54, 53, 53, 52, 52, 54, 55, 56, 56, 54, 52, 51, 52, 53, 53, 53, 52, 52, 49, 49, 51, 50, 51, 52, 56, 63, 64, 64, 64, 65, 67, 68, 70, 70, 71, 72, 72, 73, 73, 73, 73, 74, 73, 71, 69, 68, 69, 71, 72, 70, 69, 69, 71, 72, 72, 71, 71, 72, 72, 73, 74, 77, 79, 79, 79, 78, 88, 71, 65, 75, 151, 177, 219, 169, 173, 205, 171, 221, 201, 193, 179, 218, 202, 178, 213, 212, 214, 228, 186, 173, 210, 134, 181, 122, 99, 83, 122, 220, 202, 175, 147, 154, 154, 166, 143, 228, 220, 230, 220, 222, 215, 209, 218, 220, 217, 217, 217, 217, 217, 217, 217, 217, 217, 217, 217, 217, 217, 217, 217, 217, 217, 200, 162, 159, 169, 194, 241, 204, 206, 162, 120, 46, 58, 90, 111, 163, 156, 70, 74, 117, 54, 34, 51, 60, 113, 102, 150, 143, 100, 103, 60, 102, 112, 48, 36, 41, 24, 36, 39, 33, 36, 24, 35, 31, 34, 33, 25, 25, 32, 27, 26, 28, 26, 24, 38, 49, 42, 36, 34, 29, 24, 24, 29, 30, 28, 28, 29, 27, 23, 20, 19, 20, 21, 22, 21, 19, 15, 25, 32, 27, 21, 32, 26, 8, 23, 36, 36, 29, 16, 33, 24, 47, 53, 65, 52, 55, 57, 56, 53, 54, 53, 50, 52, 54, 58, 61, 56, 54, 54, 52, 54, 55, 53, 51, 50, 51, 52, 50, 51, 53, 55, 56, 55, 55, 56, 55, 54, 53, 53, 52, 52, 54, 55, 55, 55, 54, 52, 53, 54, 53, 52, 52, 50, 49, 49, 50, 49, 47, 47, 50, 54, 62, 64, 65, 65, 65, 66, 68, 72, 72, 72, 71, 69, 67, 67, 70, 71, 72, 71, 69, 67, 66, 69, 71, 72, 70, 69, 70, 72, 74, 73, 73, 73, 73, 73, 71, 72, 74, 76, 76, 77, 79, 35, 101, 67, 75, 135, 210, 237, 214, 188, 166, 153, 119, 156, 230, 152, 221, 198, 173, 221, 217, 213, 187, 185, 185, 222, 178, 182, 154, 119, 70, 104, 174, 147, 184, 132, 85, 143, 168, 167, 217, 209, 201, 199, 215, 220, 216, 218, 207, 217, 217, 217, 217, 217, 217, 217, 216, 216, 216, 216, 216, 216, 216, 217, 217, 217, 215, 187, 177, 206, 222, 190, 206, 209, 151, 93, 44, 52, 77, 88, 168, 161, 55, 74, 79, 63, 43, 56, 51, 88, 128, 147, 121, 68, 49, 57, 64, 64, 51, 52, 42, 30, 35, 31, 29, 34, 18, 28, 34, 33, 28, 28, 30, 28, 26, 27, 24, 23, 30, 35, 36, 34, 33, 34, 32, 27, 26, 29, 30, 26, 23, 23, 24, 24, 19, 21, 25, 25, 22, 23, 25, 25, 30, 16, 24, 13, 40, 35, 11, 27, 28, 25, 25, 14, 22, 37, 71, 68, 64, 50, 57, 57, 53, 51, 52, 51, 48, 50, 50, 55, 58, 55, 54, 55, 53, 55, 54, 52, 52, 52, 53, 54, 53, 54, 56, 57, 57, 56, 55, 56, 55, 54, 54, 53, 53, 53, 53, 53, 53, 53, 52, 51, 52, 53, 52, 51, 50, 49, 49, 48, 47, 45, 42, 43, 49, 55, 61, 64, 66, 65, 65, 66, 68, 70, 71, 71, 71, 68, 65, 64, 68, 69, 70, 70, 69, 68, 67, 69, 71, 72, 70, 69, 70, 71, 72, 73, 73, 74, 74, 74, 73, 74, 75, 74, 74, 77, 80, 80, 82, 67, 85, 89, 109, 176, 222, 202, 178, 112, 148, 177, 191, 173, 221, 226, 191, 207, 193, 179, 187, 165, 172, 179, 175, 149, 150, 113, 96, 129, 146, 208, 182, 145, 188, 107, 125, 183, 206, 228, 216, 209, 211, 213, 214, 217, 209, 215, 215, 215, 215, 215, 215, 215, 216, 216, 216, 216, 216, 216, 216, 217, 217, 217, 197, 170, 152, 172, 210, 223, 204, 206, 132, 87, 40, 20, 67, 100, 142, 113, 47, 74, 66, 58, 49, 62, 49, 81, 99, 157, 159, 95, 36, 49, 67, 52, 49, 37, 36, 32, 33, 26, 26, 31, 18, 23, 34, 30, 22, 28, 32, 25, 22, 27, 25, 27, 35, 29, 23, 26, 27, 32, 32, 27, 26, 28, 27, 23, 20, 19, 21, 22, 22, 25, 27, 24, 22, 27, 34, 51, 34, 16, 17, 13, 10, 30, 40, 25, 24, 23, 31, 32, 17, 20, 39, 67, 59, 57, 49, 53, 51, 50, 49, 52, 52, 50, 52, 50, 53, 57, 53, 54, 55, 55, 56, 54, 52, 52, 54, 55, 55, 54, 55, 56, 56, 56, 55, 54, 55, 54, 54, 54, 54, 54, 54, 53, 53, 52, 52, 51, 51, 51, 52, 51, 50, 50, 50, 51, 48, 45, 42, 39, 41, 47, 54, 59, 63, 66, 65, 64, 65, 67, 67, 68, 69, 69, 68, 66, 65, 66, 67, 69, 69, 68, 67, 66, 68, 70, 70, 69, 68, 68, 68, 68, 69, 70, 71, 72, 72, 71, 72, 71, 69, 68, 71, 77, 77, 81, 73, 69, 72, 75, 106, 144, 205, 208, 131, 143, 131, 153, 142, 205, 181, 189, 201, 174, 169, 158, 161, 170, 161, 199, 166, 130, 86, 92, 93, 137, 174, 171, 151, 183, 160, 135, 193, 215, 208, 232, 227, 216, 213, 215, 219, 218, 215, 215, 215, 215, 215, 215, 215, 215, 215, 215, 215, 215, 215, 216, 217, 217, 217, 176, 186, 162, 181, 193, 216, 204, 189, 132, 74, 42, 35, 44, 92, 127, 106, 37, 74, 63, 42, 51, 56, 58, 52, 89, 132, 147, 113, 54, 65, 53, 40, 42, 29, 29, 29, 29, 26, 24, 26, 21, 21, 30, 25, 19, 26, 31, 24, 20, 24, 26, 31, 36, 27, 19, 23, 24, 29, 30, 26, 25, 26, 25, 22, 20, 18, 19, 20, 23, 25, 25, 22, 23, 29, 38, 65, 33, 23, 17, 12, 15, 36, 26, 16, 20, 40, 39, 22, 25, 42, 57, 49, 58, 53, 55, 50, 48, 48, 52, 53, 51, 53, 51, 53, 56, 52, 53, 55, 55, 58, 56, 53, 53, 55, 55, 54, 54, 54, 54, 54, 53, 53, 53, 53, 54, 54, 55, 55, 55, 55, 53, 53, 52, 51, 51, 51, 52, 52, 51, 50, 50, 51, 52, 48, 45, 43, 41, 41, 45, 50, 56, 61, 65, 64, 62, 63, 66, 63, 64, 66, 67, 66, 66, 65, 64, 65, 66, 66, 65, 63, 62, 64, 66, 67, 65, 64, 65, 64, 63, 65, 67, 67, 68, 68, 65, 66, 67, 64, 61, 64, 70, 70, 90, 81, 74, 75, 78, 78, 97, 182, 222, 155, 148, 101, 122, 138, 205, 166, 172, 194, 173, 153, 166, 183, 165, 167, 168, 165, 98, 79, 84, 95, 164, 156, 140, 147, 167, 196, 150, 210, 213, 210, 211, 219, 219, 219, 221, 218, 217, 215, 215, 215, 215, 215, 215, 215, 215, 215, 215, 215, 215, 215, 216, 217, 217, 217, 179, 200, 186, 202, 192, 202, 202, 184, 159, 71, 45, 56, 25, 77, 143, 138, 38, 79, 59, 37, 51, 39, 58, 30, 86, 97, 111, 118, 83, 71, 32, 33, 32, 31, 26, 24, 26, 29, 23, 18, 24, 22, 23, 20, 18, 22, 26, 25, 21, 20, 25, 32, 32, 29, 26, 25, 24, 28, 29, 26, 26, 24, 22, 23, 22, 19, 18, 17, 19, 20, 21, 22, 25, 30, 35, 55, 28, 30, 28, 17, 6, 26, 17, 12, 19, 39, 36, 26, 36, 49, 52, 47, 63, 55, 56, 52, 48, 48, 52, 53, 51, 52, 53, 55, 56, 52, 51, 54, 55, 59, 57, 53, 52, 54, 53, 52, 53, 52, 51, 51, 52, 53, 53, 53, 53, 54, 55, 56, 57, 57, 54, 54, 52, 52, 52, 52, 53, 53, 51, 49, 48, 49, 49, 47, 47, 46, 44, 42, 43, 44, 53, 59, 63, 62, 59, 60, 63, 61, 61, 62, 62, 62, 62, 61, 61, 61, 62, 61, 58, 56, 56, 59, 62, 62, 60, 59, 61, 61, 61, 62, 64, 64, 64, 63, 59, 61, 64, 62, 59, 60, 64, 69, 86, 82, 84, 80, 80, 75, 84, 130, 188, 171, 169, 136, 138, 145, 200, 159, 166, 201, 185, 152, 200, 203, 172, 187, 133, 140, 95, 83, 85, 152, 198, 160, 123, 153, 165, 182, 150, 223, 209, 220, 191, 209, 219, 217, 215, 213, 214, 216, 216, 216, 216, 216, 216, 216, 215, 215, 215, 215, 215, 215, 216, 217, 217, 217, 191, 162, 167, 170, 198, 242, 196, 204, 193, 95, 40, 27, 31, 81, 172, 156, 57, 86, 57, 49, 46, 26, 43, 47, 72, 103, 123, 133, 103, 34, 42, 46, 25, 31, 26, 20, 23, 34, 21, 13, 25, 23, 18, 18, 19, 19, 22, 28, 25, 17, 22, 30, 30, 32, 35, 29, 27, 29, 28, 24, 27, 23, 20, 24, 25, 23, 20, 15, 16, 16, 19, 23, 26, 28, 28, 35, 25, 31, 40, 22, 9, 17, 11, 14, 18, 26, 27, 29, 45, 53, 49, 47, 62, 50, 50, 51, 49, 48, 51, 51, 48, 50, 53, 56, 56, 52, 51, 53, 54, 59, 57, 53, 52, 52, 52, 49, 51, 50, 50, 51, 52, 54, 54, 52, 52, 53, 55, 56, 57, 57, 55, 54, 53, 53, 53, 53, 54, 54, 51, 48, 46, 45, 45, 47, 49, 49, 47, 43, 41, 39, 48, 55, 61, 60, 58, 59, 62, 59, 59, 59, 58, 57, 57, 57, 58, 58, 58, 56, 53, 52, 52, 56, 59, 59, 57, 56, 57, 59, 61, 62, 63, 63, 62, 60, 57, 60, 64, 64, 60, 60, 63, 63, 64, 70, 72, 78, 71, 70, 68, 71, 109, 170, 182, 196, 192, 129, 174, 128, 186, 224, 182, 193, 211, 193, 185, 186, 169, 130, 138, 77, 82, 206, 196, 144, 146, 177, 160, 154, 151, 218, 217, 210, 196, 204, 208, 200, 200, 207, 219, 217, 217, 216, 216, 216, 217, 217, 214, 214, 215, 215, 215, 214, 215, 217, 217, 216, 132, 151, 127, 148, 168, 224, 194, 205, 185, 100, 32, 29, 47, 58, 152, 139, 59, 83, 71, 44, 38, 42, 39, 59, 144, 155, 156, 127, 94, 20, 67, 49, 37, 30, 31, 19, 21, 33, 23, 23, 22, 24, 21, 21, 23, 22, 24, 28, 26, 19, 20, 31, 38, 35, 32, 33, 28, 30, 24, 17, 24, 24, 20, 25, 34, 33, 33, 17, 22, 22, 25, 20, 17, 26, 25, 37, 34, 31, 32, 31, 24, 16, 13, 10, 11, 19, 19, 27, 30, 47, 50, 45, 44, 50, 54, 52, 49, 47, 47, 47, 48, 51, 54, 52, 52, 52, 52, 50, 52, 54, 52, 51, 50, 48, 48, 48, 48, 45, 47, 51, 53, 54, 54, 53, 53, 53, 52, 52, 53, 54, 55, 54, 54, 55, 56, 55, 51, 51, 52, 50, 48, 47, 47, 48, 50, 48, 45, 44, 44, 41, 36, 40, 47, 55, 57, 58, 60, 64, 58, 58, 58, 58, 58, 58, 58, 57, 56, 55, 55, 56, 56, 57, 58, 60, 60, 56, 55, 58, 60, 61, 63, 63, 62, 60, 58, 61, 61, 60, 61, 62, 61, 59, 65, 65, 65, 70, 78, 84, 87, 89, 71, 60, 97, 172, 129, 129, 152, 205, 199, 198, 208, 110, 227, 207, 169, 118, 93, 216, 177, 143, 79, 55, 172, 157, 145, 153, 170, 171, 164, 188, 219, 210, 215, 126, 115, 157, 200, 220, 215, 220, 220, 218, 214, 214, 214, 217, 221, 209, 210, 214, 216, 215, 212, 213, 215, 216, 215, 147, 180, 183, 195, 229, 189, 215, 193, 168, 110, 32, 58, 31, 43, 111, 91, 36, 77, 39, 46, 26, 41, 19, 28, 68, 106, 115, 98, 77, 27, 58, 48, 40, 33, 39, 40, 20, 24, 23, 32, 25, 23, 18, 17, 18, 19, 22, 28, 29, 26, 27, 32, 34, 31, 29, 27, 24, 28, 27, 22, 28, 26, 22, 27, 33, 32, 36, 25, 34, 28, 27, 27, 25, 30, 25, 33, 33, 32, 33, 33, 29, 24, 11, 15, 18, 16, 32, 37, 47, 50, 45, 43, 46, 49, 47, 48, 49, 49, 49, 52, 54, 54, 54, 55, 56, 55, 53, 53, 54, 48, 47, 47, 47, 48, 48, 48, 41, 44, 49, 53, 54, 53, 51, 53, 52, 52, 52, 53, 54, 55, 54, 54, 55, 56, 55, 52, 52, 52, 50, 49, 49, 50, 50, 51, 49, 47, 47, 48, 47, 44, 43, 47, 54, 58, 61, 63, 65, 60, 60, 60, 60, 59, 59, 59, 57, 56, 56, 56, 56, 57, 57, 57, 58, 58, 54, 53, 55, 58, 59, 60, 60, 59, 58, 57, 59, 58, 57, 59, 60, 60, 59, 60, 61, 63, 66, 71, 77, 81, 60, 83, 92, 69, 102, 170, 183, 162, 189, 190, 184, 130, 179, 188, 165, 143, 132, 166, 202, 151, 137, 103, 105, 176, 150, 156, 107, 155, 174, 136, 190, 218, 219, 208, 171, 155, 160, 179, 190, 224, 212, 204, 215, 222, 218, 211, 214, 217, 214, 210, 207, 207, 210, 215, 216, 213, 213, 212, 186, 170, 142, 144, 205, 192, 205, 201, 179, 90, 32, 35, 25, 69, 83, 58, 43, 64, 41, 54, 44, 35, 41, 51, 46, 99, 78, 79, 74, 45, 50, 44, 38, 32, 52, 58, 20, 25, 23, 31, 25, 22, 16, 14, 14, 14, 17, 23, 27, 28, 30, 31, 29, 27, 27, 24, 22, 28, 31, 28, 33, 30, 24, 26, 30, 28, 34, 26, 42, 27, 22, 25, 25, 27, 23, 26, 28, 29, 29, 28, 26, 25, 13, 10, 16, 15, 12, 36, 42, 46, 48, 45, 42, 41, 41, 42, 44, 46, 45, 46, 50, 51, 49, 49, 51, 53, 54, 52, 52, 53, 48, 48, 49, 50, 50, 50, 49, 37, 41, 47, 52, 53, 52, 50, 52, 52, 51, 52, 52, 53, 55, 55, 54, 55, 56, 56, 53, 52, 52, 51, 50, 51, 52, 53, 51, 48, 46, 47, 48, 47, 45, 42, 44, 49, 55, 59, 61, 62, 62, 62, 61, 61, 60, 60, 59, 58, 57, 57, 57, 57, 58, 57, 56, 57, 56, 53, 52, 53, 56, 58, 57, 56, 56, 56, 56, 57, 56, 55, 57, 59, 59, 58, 61, 63, 66, 67, 69, 74, 79, 68, 78, 74, 67, 75, 151, 187, 135, 187, 172, 199, 171, 157, 181, 165, 197, 160, 194, 180, 159, 102, 83, 130, 138, 136, 188, 138, 159, 166, 114, 131, 187, 210, 198, 219, 212, 128, 166, 216, 209, 207, 220, 205, 214, 210, 217, 232, 212, 213, 215, 216, 216, 215, 213, 213, 215, 215, 214, 172, 156, 133, 156, 202, 204, 201, 190, 150, 70, 35, 22, 29, 55, 58, 41, 48, 49, 47, 50, 36, 34, 37, 53, 70, 95, 70, 82, 76, 60, 45, 42, 36, 33, 55, 59, 16, 33, 23, 22, 25, 25, 19, 16, 15, 13, 15, 20, 23, 25, 26, 26, 25, 24, 25, 25, 22, 28, 34, 33, 35, 31, 25, 23, 25, 23, 30, 20, 43, 25, 16, 22, 21, 23, 22, 20, 24, 26, 24, 21, 20, 22, 13, 17, 17, 17, 41, 45, 48, 47, 44, 41, 37, 36, 38, 40, 40, 40, 42, 43, 44, 44, 43, 45, 49, 51, 51, 52, 54, 51, 50, 51, 52, 50, 48, 46, 38, 41, 46, 50, 51, 50, 50, 51, 51, 50, 51, 52, 53, 54, 55, 54, 54, 56, 56, 53, 52, 52, 51, 51, 52, 52, 53, 51, 49, 47, 47, 47, 46, 45, 41, 41, 45, 52, 58, 60, 58, 63, 62, 62, 61, 60, 59, 59, 58, 58, 57, 57, 57, 58, 58, 57, 57, 56, 54, 52, 52, 55, 57, 55, 54, 54, 54, 55, 56, 55, 55, 56, 58, 58, 57, 53, 57, 60, 58, 58, 63, 68, 73, 72, 61, 71, 70, 107, 163, 110, 152, 173, 184, 158, 162, 163, 195, 214, 164, 190, 163, 143, 86, 66, 96, 119, 158, 186, 175, 185, 192, 118, 160, 194, 209, 213, 219, 205, 130, 151, 191, 209, 220, 212, 206, 202, 209, 217, 218, 216, 211, 211, 211, 214, 217, 216, 215, 218, 217, 216, 167, 132, 145, 175, 196, 214, 208, 187, 148, 78, 36, 37, 44, 37, 38, 40, 41, 50, 42, 40, 26, 33, 30, 30, 76, 84, 74, 90, 72, 65, 46, 45, 35, 36, 49, 52, 15, 38, 25, 15, 25, 28, 24, 23, 22, 19, 18, 21, 21, 20, 20, 21, 22, 21, 23, 25, 22, 28, 34, 34, 34, 32, 25, 20, 22, 23, 28, 14, 38, 22, 16, 23, 20, 20, 23, 19, 24, 26, 22, 18, 18, 22, 19, 19, 25, 30, 46, 46, 51, 45, 43, 40, 35, 34, 35, 36, 37, 39, 39, 38, 40, 45, 42, 42, 46, 49, 51, 53, 55, 51, 49, 51, 49, 47, 43, 40, 41, 43, 45, 48, 49, 50, 50, 51, 50, 50, 50, 51, 53, 53, 55, 53, 53, 55, 55, 53, 53, 52, 52, 51, 51, 51, 51, 52, 52, 50, 48, 47, 46, 46, 44, 42, 45, 52, 58, 60, 58, 61, 61, 60, 59, 59, 58, 58, 59, 58, 57, 57, 58, 58, 59, 59, 58, 57, 56, 55, 54, 56, 57, 55, 54, 54, 55, 56, 58, 57, 56, 57, 57, 57, 56, 53, 57, 60, 57, 55, 59, 64, 67, 66, 66, 68, 74, 82, 122, 103, 156, 173, 176, 139, 170, 161, 201, 202, 174, 189, 163, 143, 97, 57, 66, 152, 197, 186, 191, 202, 205, 150, 210, 211, 216, 217, 210, 200, 150, 137, 170, 217, 219, 208, 205, 195, 212, 220, 213, 221, 212, 208, 206, 212, 221, 221, 217, 217, 217, 216, 189, 115, 150, 154, 168, 214, 214, 200, 176, 100, 50, 60, 51, 38, 31, 47, 31, 62, 31, 34, 35, 32, 38, 23, 42, 75, 73, 84, 60, 59, 49, 50, 37, 37, 43, 53, 24, 37, 27, 19, 25, 27, 26, 29, 30, 26, 24, 26, 24, 18, 15, 17, 21, 19, 21, 23, 21, 25, 30, 31, 31, 31, 26, 20, 24, 28, 31, 13, 29, 20, 23, 30, 22, 20, 23, 19, 24, 27, 24, 20, 21, 27, 24, 20, 34, 44, 49, 45, 54, 43, 42, 39, 36, 33, 33, 33, 35, 39, 38, 36, 40, 49, 46, 43, 46, 49, 50, 52, 54, 47, 45, 46, 44, 42, 38, 36, 45, 46, 46, 47, 48, 49, 51, 50, 50, 50, 50, 50, 52, 53, 54, 52, 52, 53, 55, 54, 52, 52, 52, 51, 49, 48, 47, 51, 53, 52, 50, 49, 50, 51, 48, 46, 48, 53, 58, 60, 58, 58, 58, 57, 57, 56, 56, 56, 58, 58, 57, 57, 58, 58, 59, 61, 59, 59, 59, 59, 57, 57, 57, 56, 55, 56, 57, 58, 59, 58, 57, 57, 58, 57, 55, 60, 64, 67, 64, 61, 64, 68, 59, 58, 73, 59, 79, 85, 83, 107, 206, 173, 192, 171, 170, 181, 177, 187, 195, 200, 180, 166, 125, 66, 81, 195, 203, 201, 183, 199, 164, 189, 222, 211, 218, 204, 216, 220, 165, 139, 188, 213, 210, 222, 195, 197, 215, 227, 227, 220, 217, 214, 210, 214, 223, 220, 214, 214, 215, 216, 158, 151, 156, 143, 156, 198, 207, 191, 135, 83, 97, 52, 19, 27, 37, 45, 38, 63, 30, 31, 50, 43, 38, 67, 24, 85, 66, 60, 49, 48, 51, 50, 35, 31, 49, 70, 47, 31, 30, 28, 22, 20, 21, 26, 31, 28, 25, 28, 29, 22, 16, 17, 20, 19, 19, 20, 18, 21, 23, 26, 27, 28, 25, 21, 28, 33, 36, 19, 20, 16, 28, 33, 23, 19, 18, 17, 21, 25, 23, 21, 24, 29, 23, 20, 38, 48, 47, 38, 52, 42, 40, 39, 37, 34, 30, 27, 29, 35, 36, 35, 41, 50, 48, 45, 44, 44, 43, 45, 48, 43, 43, 43, 43, 41, 39, 37, 47, 47, 47, 48, 49, 49, 50, 50, 49, 49, 49, 50, 51, 52, 53, 51, 50, 52, 54, 54, 52, 51, 51, 50, 49, 47, 45, 47, 49, 49, 49, 48, 51, 54, 49, 48, 48, 51, 53, 55, 55, 54, 54, 54, 54, 54, 55, 55, 58, 57, 57, 57, 57, 58, 59, 61, 59, 59, 61, 61, 59, 58, 58, 58, 57, 58, 58, 59, 60, 59, 57, 58, 59, 58, 57, 53, 56, 57, 55, 53, 54, 57, 64, 53, 60, 59, 74, 72, 74, 104, 192, 195, 191, 219, 204, 186, 191, 162, 175, 189, 187, 156, 146, 106, 107, 143, 137, 186, 167, 194, 92, 206, 230, 215, 209, 217, 210, 202, 179, 175, 187, 182, 233, 213, 190, 199, 223, 223, 210, 211, 219, 215, 203, 199, 206, 207, 208, 214, 217, 220, 74, 128, 159, 138, 147, 195, 189, 162, 125, 50, 29, 33, 70, 27, 35, 32, 42, 42, 28, 22, 30, 27, 37, 50, 56, 87, 58, 55, 53, 41, 46, 44, 38, 29, 48, 69, 64, 30, 30, 29, 23, 17, 17, 22, 26, 23, 21, 24, 28, 25, 20, 19, 19, 20, 21, 23, 22, 19, 18, 20, 22, 24, 23, 24, 28, 28, 33, 21, 18, 15, 23, 23, 16, 16, 14, 15, 18, 20, 19, 18, 21, 24, 21, 24, 40, 45, 44, 36, 47, 42, 40, 38, 37, 32, 24, 18, 19, 24, 31, 37, 42, 45, 44, 43, 41, 38, 37, 39, 42, 44, 45, 44, 42, 40, 39, 38, 43, 46, 48, 50, 50, 49, 48, 49, 49, 48, 49, 50, 50, 51, 51, 49, 48, 50, 52, 53, 51, 49, 50, 50, 49, 47, 46, 45, 46, 46, 46, 46, 49, 53, 48, 48, 48, 47, 46, 48, 49, 50, 51, 51, 52, 53, 54, 54, 57, 56, 56, 56, 56, 57, 58, 58, 56, 57, 60, 61, 58, 57, 58, 59, 60, 60, 60, 60, 58, 55, 55, 57, 60, 60, 59, 59, 60, 61, 61, 60, 60, 60, 56, 61, 59, 66, 49, 45, 88, 84, 96, 124, 193, 155, 219, 190, 207, 161, 109, 109, 55, 141, 89, 68, 90, 116, 145, 160, 158, 119, 137, 211, 236, 231, 223, 210, 176, 236, 187, 128, 138, 151, 152, 148, 195, 178, 224, 184, 105, 186, 193, 191, 174, 165, 182, 205, 214, 217, 219, 222, 93, 71, 94, 119, 171, 130, 168, 191, 126, 48, 50, 37, 21, 35, 33, 39, 37, 49, 27, 26, 27, 32, 39, 38, 42, 51, 62, 53, 57, 36, 39, 38, 48, 42, 31, 40, 59, 30, 27, 25, 30, 24, 22, 23, 25, 22, 20, 22, 21, 24, 24, 20, 18, 22, 27, 30, 29, 22, 15, 16, 19, 20, 21, 24, 24, 18, 23, 17, 24, 20, 18, 12, 9, 18, 17, 19, 20, 20, 18, 17, 18, 20, 24, 34, 45, 44, 48, 41, 47, 43, 39, 38, 37, 31, 20, 13, 13, 17, 29, 42, 46, 42, 42, 43, 41, 38, 37, 41, 45, 46, 46, 43, 39, 36, 34, 33, 38, 43, 49, 52, 52, 49, 46, 49, 48, 48, 48, 49, 50, 51, 50, 48, 47, 49, 51, 52, 49, 47, 49, 50, 50, 49, 48, 49, 50, 51, 48, 46, 49, 53, 50, 51, 51, 48, 45, 46, 49, 49, 49, 51, 52, 53, 54, 55, 57, 56, 55, 55, 56, 56, 57, 56, 53, 54, 58, 59, 57, 56, 57, 59, 61, 61, 60, 60, 55, 53, 53, 56, 60, 61, 61, 60, 59, 59, 60, 61, 60, 58, 55, 58, 61, 65, 55, 66, 63, 72, 83, 98, 154, 196, 215, 200, 218, 167, 61, 108, 72, 171, 117, 93, 186, 159, 88, 174, 176, 102, 195, 208, 216, 227, 192, 221, 191, 199, 178, 131, 115, 191, 208, 192, 159, 134, 180, 163, 104, 135, 137, 177, 200, 202, 210, 218, 218, 216, 217, 219, 89, 70, 150, 138, 184, 144, 175, 160, 97, 41, 49, 16, 33, 27, 35, 38, 34, 56, 27, 21, 25, 26, 32, 31, 36, 53, 82, 52, 45, 41, 43, 39, 47, 44, 28, 68, 82, 40, 25, 28, 29, 29, 28, 29, 29, 26, 23, 23, 24, 26, 26, 24, 25, 29, 34, 37, 33, 23, 17, 19, 18, 17, 19, 22, 24, 22, 22, 18, 22, 27, 22, 15, 18, 23, 25, 28, 28, 21, 15, 17, 19, 16, 26, 43, 49, 43, 45, 45, 47, 46, 44, 41, 39, 34, 26, 21, 17, 25, 30, 41, 41, 43, 40, 40, 39, 39, 41, 41, 38, 37, 38, 38, 35, 33, 34, 34, 35, 36, 40, 46, 50, 48, 45, 51, 52, 48, 45, 47, 49, 48, 51, 49, 48, 49, 50, 51, 49, 48, 48, 49, 48, 48, 48, 49, 51, 52, 49, 47, 48, 51, 49, 51, 53, 50, 45, 44, 44, 48, 49, 51, 52, 53, 54, 55, 56, 55, 54, 54, 56, 58, 59, 58, 54, 53, 57, 57, 56, 54, 54, 56, 58, 59, 60, 61, 57, 55, 54, 55, 58, 61, 63, 63, 61, 60, 60, 61, 62, 62, 59, 59, 61, 64, 61, 64, 54, 62, 73, 70, 115, 199, 213, 199, 213, 203, 114, 145, 119, 191, 137, 104, 139, 150, 102, 197, 215, 121, 218, 219, 217, 213, 197, 204, 171, 185, 189, 137, 102, 201, 220, 213, 141, 127, 174, 149, 112, 95, 123, 159, 177, 224, 224, 214, 211, 214, 217, 214, 65, 113, 140, 152, 189, 157, 157, 133, 73, 36, 41, 6, 40, 22, 35, 36, 34, 51, 27, 22, 33, 28, 29, 26, 28, 63, 97, 55, 39, 45, 47, 45, 51, 50, 21, 62, 68, 36, 28, 33, 21, 28, 29, 30, 29, 27, 24, 23, 26, 27, 26, 26, 28, 32, 36, 37, 32, 23, 20, 24, 21, 17, 18, 22, 23, 23, 21, 21, 19, 29, 24, 19, 25, 26, 30, 33, 33, 25, 18, 19, 20, 15, 30, 47, 50, 42, 43, 46, 45, 45, 44, 43, 40, 36, 32, 30, 26, 35, 36, 40, 38, 44, 39, 38, 37, 38, 40, 39, 35, 33, 35, 35, 35, 35, 35, 34, 36, 33, 33, 39, 44, 44, 40, 50, 51, 46, 43, 48, 49, 47, 50, 50, 49, 49, 49, 50, 50, 49, 49, 50, 48, 47, 47, 47, 49, 50, 49, 46, 46, 48, 47, 50, 52, 49, 44, 42, 42, 48, 49, 51, 53, 54, 54, 54, 55, 54, 53, 54, 56, 59, 60, 58, 55, 54, 56, 57, 56, 54, 55, 55, 57, 58, 60, 60, 58, 56, 55, 55, 57, 60, 62, 60, 60, 59, 59, 60, 61, 62, 63, 61, 61, 64, 64, 61, 55, 56, 70, 56, 85, 195, 198, 204, 207, 208, 128, 169, 166, 182, 120, 85, 94, 103, 105, 189, 220, 133, 219, 216, 211, 217, 219, 170, 150, 145, 169, 148, 164, 207, 215, 218, 172, 177, 158, 148, 126, 74, 108, 123, 132, 194, 221, 213, 213, 218, 216, 211, 44, 145, 97, 157, 179, 145, 135, 124, 58, 34, 36, 16, 22, 26, 32, 36, 37, 38, 29, 36, 45, 40, 34, 24, 24, 57, 84, 60, 47, 48, 48, 46, 54, 56, 22, 30, 35, 29, 34, 34, 18, 25, 26, 27, 26, 25, 22, 22, 25, 25, 24, 24, 26, 30, 33, 32, 28, 22, 21, 25, 24, 18, 18, 23, 21, 18, 18, 22, 18, 26, 22, 18, 24, 25, 29, 31, 31, 29, 25, 21, 19, 17, 37, 49, 49, 42, 44, 46, 42, 41, 42, 42, 40, 37, 33, 33, 34, 40, 45, 40, 41, 42, 40, 39, 37, 37, 35, 35, 39, 38, 36, 35, 37, 40, 37, 31, 38, 35, 33, 36, 39, 38, 34, 44, 46, 45, 44, 49, 50, 48, 49, 49, 49, 49, 50, 51, 50, 50, 51, 53, 51, 49, 46, 45, 47, 48, 47, 45, 45, 47, 47, 50, 49, 45, 41, 41, 45, 48, 49, 50, 52, 53, 53, 54, 54, 53, 54, 54, 56, 57, 58, 56, 56, 56, 56, 57, 57, 57, 58, 58, 58, 58, 58, 59, 57, 56, 56, 56, 57, 58, 59, 55, 56, 58, 60, 60, 59, 58, 62, 61, 62, 65, 66, 63, 59, 56, 66, 66, 64, 171, 192, 203, 198, 183, 84, 160, 176, 159, 91, 60, 96, 64, 86, 157, 188, 140, 206, 181, 175, 199, 203, 142, 141, 120, 159, 173, 234, 214, 222, 210, 197, 213, 131, 136, 132, 73, 84, 90, 114, 145, 182, 207, 215, 217, 211, 212, 62, 132, 155, 159, 157, 142, 150, 98, 34, 29, 31, 32, 14, 35, 31, 35, 42, 32, 34, 56, 50, 45, 42, 32, 34, 39, 51, 58, 57, 59, 51, 39, 44, 49, 44, 39, 46, 40, 33, 31, 24, 24, 24, 24, 24, 23, 21, 21, 24, 24, 23, 23, 25, 29, 30, 27, 24, 19, 19, 24, 24, 19, 19, 23, 20, 15, 17, 24, 17, 22, 18, 16, 20, 20, 25, 26, 27, 30, 29, 22, 19, 23, 43, 49, 47, 43, 45, 45, 40, 39, 41, 42, 40, 37, 32, 33, 38, 41, 51, 39, 44, 41, 41, 40, 41, 43, 38, 35, 43, 42, 36, 34, 38, 41, 37, 29, 42, 37, 34, 35, 36, 34, 32, 37, 41, 43, 45, 49, 51, 49, 48, 48, 48, 49, 50, 51, 51, 50, 53, 55, 53, 49, 45, 45, 46, 48, 47, 46, 46, 48, 49, 49, 46, 40, 36, 39, 46, 47, 48, 50, 52, 53, 53, 53, 53, 53, 54, 55, 56, 56, 56, 55, 57, 59, 58, 58, 59, 60, 61, 60, 59, 58, 57, 57, 55, 56, 56, 57, 56, 56, 55, 53, 56, 61, 64, 64, 61, 59, 60, 60, 61, 64, 65, 63, 62, 60, 51, 83, 52, 104, 196, 184, 180, 165, 59, 138, 132, 140, 85, 58, 84, 67, 91, 134, 146, 159, 179, 129, 129, 122, 121, 133, 130, 179, 217, 208, 212, 212, 239, 186, 152, 168, 141, 111, 129, 99, 81, 98, 142, 139, 110, 184, 205, 209, 205, 219, 163, 174, 90, 86, 174, 162, 115, 64, 17, 24, 29, 41, 17, 39, 32, 35, 44, 42, 39, 73, 62, 22, 37, 54, 28, 42, 53, 54, 50, 47, 41, 35, 44, 49, 40, 38, 52, 40, 26, 30, 38, 27, 26, 24, 23, 21, 21, 21, 24, 24, 23, 22, 24, 28, 30, 26, 22, 18, 18, 21, 22, 20, 20, 22, 21, 18, 20, 24, 17, 22, 18, 16, 18, 17, 22, 23, 21, 25, 27, 20, 21, 33, 48, 48, 45, 44, 47, 47, 41, 42, 43, 44, 41, 36, 30, 30, 34, 36, 52, 36, 45, 41, 41, 39, 44, 51, 44, 36, 41, 42, 36, 33, 37, 37, 33, 29, 44, 40, 38, 37, 38, 37, 36, 34, 38, 43, 46, 50, 50, 48, 47, 47, 48, 49, 50, 52, 52, 51, 53, 54, 52, 49, 46, 46, 48, 48, 48, 48, 48, 49, 52, 50, 44, 35, 32, 37, 46, 47, 48, 50, 52, 53, 53, 53, 52, 52, 54, 55, 55, 55, 54, 55, 60, 62, 59, 57, 59, 60, 60, 59, 58, 57, 56, 55, 54, 55, 57, 58, 56, 54, 52, 54, 57, 62, 65, 65, 63, 62, 57, 57, 59, 61, 61, 60, 58, 57, 62, 52, 70, 101, 81, 224, 204, 143, 34, 157, 115, 99, 61, 57, 53, 82, 92, 114, 92, 130, 174, 156, 180, 115, 85, 128, 101, 223, 212, 231, 229, 226, 244, 187, 128, 172, 233, 200, 219, 179, 129, 169, 135, 177, 130, 206, 244, 225, 217, 228, 147, 96, 60, 90, 85, 99, 86, 48, 24, 29, 28, 39, 23, 32, 33, 30, 38, 53, 33, 69, 109, 92, 49, 40, 56, 51, 49, 59, 44, 32, 31, 35, 43, 39, 34, 27, 34, 27, 28, 33, 27, 32, 30, 27, 24, 22, 22, 22, 22, 23, 22, 20, 21, 26, 28, 26, 21, 19, 20, 21, 22, 23, 22, 21, 23, 25, 25, 22, 17, 21, 19, 19, 22, 19, 25, 28, 22, 22, 22, 18, 25, 41, 49, 46, 43, 45, 50, 48, 43, 44, 45, 45, 43, 38, 34, 31, 32, 33, 49, 34, 44, 40, 40, 37, 40, 47, 44, 36, 37, 42, 38, 37, 37, 34, 31, 34, 41, 40, 39, 40, 42, 42, 41, 35, 38, 44, 47, 48, 48, 48, 47, 47, 47, 48, 50, 51, 52, 51, 51, 51, 49, 48, 47, 47, 48, 47, 48, 48, 48, 48, 54, 50, 41, 32, 29, 36, 44, 47, 48, 50, 51, 53, 53, 53, 52, 53, 54, 55, 55, 54, 53, 55, 59, 60, 56, 54, 54, 57, 57, 56, 56, 56, 56, 55, 54, 55, 57, 58, 56, 53, 51, 51, 53, 55, 56, 58, 59, 59, 58, 59, 60, 60, 59, 57, 56, 57, 54, 54, 68, 54, 60, 173, 193, 175, 51, 156, 110, 97, 67, 48, 46, 70, 75, 93, 66, 94, 126, 110, 146, 92, 80, 130, 83, 171, 216, 181, 155, 147, 163, 155, 169, 160, 190, 177, 186, 117, 112, 138, 103, 128, 127, 147, 136, 160, 205, 215, 80, 44, 46, 64, 41, 59, 80, 39, 32, 33, 30, 36, 30, 26, 34, 28, 32, 56, 25, 56, 135, 157, 140, 113, 66, 50, 50, 45, 36, 40, 40, 35, 36, 31, 42, 36, 36, 27, 33, 36, 21, 36, 32, 28, 25, 23, 23, 23, 21, 21, 20, 19, 20, 23, 25, 21, 16, 15, 17, 18, 21, 23, 22, 20, 23, 28, 27, 22, 14, 18, 16, 18, 22, 19, 26, 33, 26, 22, 20, 20, 30, 46, 47, 44, 42, 46, 50, 49, 45, 43, 44, 45, 44, 42, 39, 37, 35, 37, 47, 34, 41, 39, 41, 41, 39, 41, 41, 39, 39, 43, 39, 39, 40, 35, 32, 38, 37, 39, 40, 42, 43, 44, 43, 38, 39, 45, 49, 48, 47, 48, 47, 47, 47, 48, 49, 51, 51, 51, 50, 49, 48, 48, 48, 48, 47, 45, 46, 47, 46, 45, 53, 48, 37, 30, 31, 37, 42, 48, 49, 51, 52, 54, 54, 54, 53, 54, 54, 54, 55, 54, 54, 53, 55, 56, 52, 51, 51, 53, 55, 55, 55, 55, 56, 56, 54, 55, 57, 58, 56, 53, 51, 51, 51, 50, 51, 53, 55, 57, 59, 61, 62, 61, 58, 57, 56, 54, 56, 56, 54, 44, 50, 115, 153, 159, 49, 133, 109, 104, 74, 55, 53, 74, 72, 78, 69, 76, 82, 105, 102, 91, 90, 117, 80, 96, 144, 147, 179, 195, 196, 187, 147, 204, 210, 126, 177, 94, 93, 121, 82, 96, 131, 165, 129, 117, 129, 204, 43, 37, 40, 48, 32, 56, 60, 37, 36, 33, 30, 33, 32, 22, 35, 30, 32, 50, 23, 46, 123, 174, 183, 162, 121, 100, 74, 46, 38, 50, 48, 37, 38, 37, 40, 38, 38, 30, 32, 35, 28, 34, 31, 27, 24, 24, 25, 26, 22, 22, 20, 19, 20, 23, 24, 18, 13, 13, 15, 16, 18, 22, 21, 18, 20, 26, 25, 21, 13, 16, 15, 18, 20, 16, 24, 30, 27, 21, 20, 26, 37, 47, 46, 43, 42, 46, 50, 48, 45, 44, 44, 44, 44, 44, 43, 42, 39, 41, 44, 36, 38, 39, 40, 44, 44, 38, 38, 42, 42, 43, 38, 40, 44, 38, 33, 38, 36, 39, 42, 44, 44, 43, 42, 41, 40, 46, 50, 48, 48, 50, 48, 48, 47, 47, 49, 50, 50, 50, 50, 50, 50, 50, 50, 49, 47, 45, 45, 46, 45, 42, 51, 43, 33, 30, 35, 40, 42, 49, 50, 52, 54, 54, 55, 55, 55, 55, 54, 54, 55, 55, 55, 54, 53, 53, 52, 52, 51, 53, 55, 55, 55, 55, 56, 56, 55, 55, 57, 57, 56, 55, 53, 53, 52, 50, 50, 52, 55, 57, 58, 61, 62, 61, 58, 57, 57, 53, 60, 55, 45, 52, 48, 77, 114, 124, 45, 92, 89, 93, 68, 60, 57, 79, 66, 62, 70, 65, 72, 124, 61, 86, 105, 101, 69, 89, 120, 119, 170, 223, 225, 161, 118, 207, 226, 150, 177, 111, 82, 76, 102, 108, 97, 161, 143, 121, 114, 138, 40, 40, 36, 42, 35, 62, 48, 40, 36, 29, 28, 30, 25, 19, 36, 35, 37, 42, 29, 44, 83, 145, 184, 176, 170, 167, 132, 98, 70, 55, 44, 39, 44, 42, 38, 37, 37, 31, 28, 30, 32, 31, 28, 24, 22, 24, 26, 28, 25, 24, 23, 21, 22, 26, 28, 22, 16, 16, 17, 15, 17, 21, 20, 17, 17, 19, 21, 22, 19, 20, 19, 21, 21, 14, 21, 20, 22, 20, 21, 32, 43, 47, 45, 42, 43, 47, 48, 46, 45, 46, 45, 44, 43, 43, 44, 45, 40, 44, 39, 38, 35, 40, 35, 44, 50, 39, 36, 42, 41, 41, 35, 39, 47, 43, 34, 34, 39, 42, 46, 46, 44, 42, 40, 43, 41, 46, 51, 49, 50, 52, 49, 48, 47, 47, 48, 49, 48, 48, 51, 53, 53, 52, 51, 51, 48, 46, 45, 46, 44, 41, 48, 39, 29, 31, 40, 44, 43, 49, 51, 53, 55, 55, 56, 56, 57, 56, 54, 54, 55, 56, 57, 56, 54, 53, 55, 56, 56, 56, 57, 57, 56, 56, 56, 56, 55, 55, 57, 57, 57, 56, 55, 55, 54, 52, 52, 53, 55, 57, 54, 58, 61, 59, 57, 57, 58, 54, 61, 56, 46, 57, 57, 57, 84, 87, 45, 56, 76, 74, 58, 61, 60, 74, 53, 53, 65, 60, 74, 121, 54, 77, 103, 90, 57, 93, 120, 98, 155, 223, 171, 120, 101, 147, 187, 169, 132, 120, 92, 51, 104, 125, 115, 156, 153, 128, 118, 73, 39, 25, 32, 37, 33, 50, 59, 42, 33, 24, 24, 26, 17, 17, 39, 41, 41, 37, 35, 43, 48, 100, 170, 184, 174, 197, 193, 175, 129, 83, 59, 51, 50, 33, 43, 36, 38, 34, 25, 25, 25, 29, 25, 22, 22, 25, 25, 28, 28, 27, 25, 24, 24, 28, 32, 28, 22, 22, 21, 17, 18, 20, 19, 16, 15, 16, 17, 21, 24, 27, 23, 24, 23, 16, 21, 13, 17, 17, 22, 39, 50, 47, 45, 42, 43, 47, 47, 45, 44, 48, 47, 44, 42, 42, 43, 45, 42, 44, 37, 41, 35, 41, 33, 40, 49, 42, 38, 38, 36, 40, 34, 38, 48, 45, 35, 31, 41, 45, 48, 48, 45, 41, 40, 43, 42, 47, 51, 50, 52, 54, 49, 49, 47, 47, 47, 48, 47, 48, 51, 54, 54, 53, 50, 51, 50, 47, 47, 47, 46, 44, 44, 33, 28, 32, 43, 47, 46, 52, 52, 53, 55, 56, 55, 55, 58, 57, 54, 54, 54, 58, 58, 58, 55, 55, 57, 60, 60, 59, 57, 57, 56, 56, 56, 55, 55, 56, 56, 57, 56, 56, 56, 55, 54, 53, 53, 53, 54, 54, 51, 55, 57, 57, 55, 56, 57, 58, 58, 57, 53, 50, 67, 48, 60, 62, 47, 43, 81, 63, 52, 60, 66, 62, 43, 54, 57, 61, 63, 83, 83, 72, 82, 82, 53, 63, 94, 104, 169, 209, 83, 112, 92, 85, 121, 114, 57, 94, 103, 70, 65, 121, 200, 185, 168, 117, 106, 93, 11, 18, 34, 38, 29, 29, 55, 29, 24, 17, 24, 24, 28, 25, 43, 42, 31, 33, 29, 22, 62, 79, 112, 191, 192, 179, 180, 177, 177, 189, 167, 110, 67, 26, 28, 22, 49, 37, 20, 38, 27, 30, 26, 21, 27, 30, 18, 24, 30, 27, 19, 21, 22, 23, 28, 24, 24, 26, 24, 18, 18, 19, 17, 18, 22, 20, 17, 17, 16, 20, 15, 16, 22, 19, 23, 27, 22, 15, 23, 47, 59, 51, 43, 42, 44, 47, 48, 44, 41, 47, 48, 46, 43, 42, 46, 49, 49, 38, 36, 48, 39, 41, 47, 37, 37, 52, 49, 37, 36, 42, 42, 44, 46, 41, 38, 40, 39, 41, 43, 45, 45, 44, 43, 43, 45, 48, 50, 52, 53, 53, 50, 50, 49, 49, 48, 48, 47, 48, 48, 48, 48, 48, 48, 49, 48, 46, 45, 47, 49, 52, 33, 25, 33, 33, 41, 49, 52, 59, 56, 53, 53, 54, 53, 50, 55, 56, 54, 55, 49, 59, 56, 56, 56, 55, 56, 58, 60, 58, 54, 54, 55, 55, 56, 56, 55, 56, 56, 57, 56, 56, 55, 57, 56, 55, 53, 51, 50, 50, 49, 50, 51, 52, 52, 52, 52, 58, 57, 54, 55, 43, 57, 51, 52, 60, 49, 42, 62, 54, 41, 62, 62, 50, 49, 53, 46, 62, 55, 68, 94, 67, 79, 57, 43, 88, 63, 158, 140, 120, 133, 63, 93, 154, 148, 73, 81, 80, 64, 60, 71, 138, 161, 205, 194, 159, 161, 227, 31, 33, 31, 42, 51, 33, 45, 26, 22, 18, 23, 25, 21, 25, 26, 28, 24, 31, 39, 37, 63, 74, 69, 131, 200, 200, 201, 196, 188, 166, 164, 145, 131, 76, 53, 32, 19, 29, 25, 33, 20, 12, 35, 32, 29, 28, 28, 26, 28, 26, 19, 21, 18, 15, 20, 23, 23, 26, 24, 17, 16, 20, 20, 20, 24, 22, 18, 18, 15, 21, 20, 20, 22, 19, 25, 29, 22, 23, 35, 48, 52, 49, 44, 42, 43, 45, 46, 43, 40, 45, 46, 46, 44, 45, 48, 50, 48, 42, 40, 48, 43, 44, 47, 41, 40, 47, 46, 39, 40, 47, 44, 39, 34, 29, 32, 42, 40, 40, 42, 43, 44, 46, 46, 46, 47, 48, 50, 51, 51, 51, 51, 50, 50, 49, 49, 48, 48, 48, 48, 48, 48, 48, 48, 49, 51, 49, 45, 45, 47, 51, 26, 28, 33, 38, 41, 47, 53, 56, 53, 51, 51, 53, 51, 49, 46, 48, 47, 50, 45, 56, 54, 57, 57, 57, 59, 61, 63, 59, 54, 54, 55, 55, 56, 56, 56, 56, 57, 58, 57, 56, 56, 56, 55, 54, 53, 51, 50, 49, 48, 49, 50, 51, 51, 50, 50, 51, 52, 52, 54, 48, 54, 51, 52, 58, 54, 47, 60, 56, 41, 45, 60, 39, 48, 53, 49, 69, 83, 89, 89, 83, 89, 70, 47, 61, 109, 131, 198, 106, 105, 52, 113, 214, 188, 166, 68, 111, 93, 122, 86, 79, 153, 226, 218, 215, 194, 222, 40, 33, 45, 35, 40, 37, 25, 27, 28, 22, 49, 17, 29, 35, 41, 34, 21, 37, 27, 35, 50, 66, 102, 85, 137, 198, 183, 179, 190, 178, 180, 167, 144, 150, 105, 35, 47, 26, 33, 27, 34, 19, 35, 34, 38, 23, 26, 22, 21, 21, 18, 28, 30, 29, 32, 30, 30, 32, 31, 24, 22, 23, 22, 23, 26, 24, 19, 18, 15, 23, 25, 22, 21, 17, 24, 25, 19, 29, 45, 48, 45, 47, 44, 43, 43, 44, 44, 41, 39, 42, 44, 45, 45, 47, 50, 52, 49, 47, 45, 44, 47, 45, 43, 42, 42, 44, 45, 48, 52, 48, 42, 36, 29, 23, 29, 44, 41, 40, 40, 41, 44, 48, 50, 48, 49, 49, 50, 50, 49, 49, 52, 51, 51, 50, 50, 49, 49, 48, 48, 48, 48, 48, 48, 49, 51, 51, 48, 46, 47, 51, 21, 29, 34, 41, 41, 45, 53, 52, 50, 49, 49, 51, 50, 48, 46, 48, 48, 51, 45, 55, 52, 52, 52, 52, 54, 56, 58, 56, 54, 54, 55, 55, 55, 56, 56, 56, 57, 57, 57, 56, 56, 55, 54, 53, 52, 51, 49, 48, 47, 47, 49, 49, 49, 49, 48, 47, 48, 51, 54, 56, 50, 51, 49, 53, 56, 49, 57, 56, 43, 37, 65, 35, 54, 58, 57, 58, 74, 72, 60, 69, 64, 61, 36, 60, 147, 163, 150, 97, 126, 150, 147, 175, 196, 160, 53, 140, 111, 174, 196, 115, 123, 135, 205, 228, 213, 228, 40, 36, 40, 36, 45, 28, 20, 17, 26, 23, 66, 11, 27, 28, 39, 50, 23, 28, 28, 34, 47, 76, 84, 73, 94, 171, 187, 185, 194, 169, 160, 164, 168, 185, 144, 44, 87, 33, 38, 30, 39, 29, 32, 21, 29, 11, 25, 23, 18, 17, 15, 27, 33, 32, 35, 32, 29, 31, 29, 24, 22, 24, 23, 24, 27, 25, 20, 19, 18, 27, 27, 23, 21, 16, 20, 17, 18, 33, 48, 47, 42, 44, 44, 43, 43, 42, 42, 40, 40, 43, 44, 45, 46, 48, 50, 53, 50, 50, 47, 39, 48, 46, 40, 44, 45, 40, 43, 50, 55, 42, 38, 37, 31, 25, 30, 45, 42, 40, 41, 42, 44, 47, 50, 49, 49, 50, 50, 49, 48, 48, 52, 52, 52, 52, 51, 51, 50, 49, 49, 49, 49, 49, 49, 48, 49, 51, 51, 49, 48, 48, 22, 30, 34, 41, 41, 43, 50, 48, 48, 47, 47, 48, 49, 49, 49, 52, 52, 54, 47, 55, 50, 47, 47, 47, 48, 50, 52, 52, 53, 53, 54, 54, 55, 55, 55, 55, 56, 56, 56, 55, 55, 53, 53, 52, 50, 49, 49, 47, 46, 47, 48, 49, 48, 48, 48, 48, 47, 50, 53, 63, 48, 51, 46, 49, 51, 49, 57, 54, 44, 41, 68, 38, 61, 61, 64, 60, 66, 61, 52, 59, 45, 57, 54, 58, 127, 147, 123, 103, 102, 129, 127, 109, 133, 110, 75, 100, 115, 169, 186, 89, 129, 121, 205, 215, 215, 228, 48, 38, 44, 35, 37, 26, 27, 21, 26, 24, 59, 19, 28, 48, 61, 77, 58, 23, 33, 34, 44, 76, 68, 76, 74, 121, 180, 189, 165, 152, 173, 172, 185, 182, 173, 89, 100, 39, 35, 37, 40, 31, 36, 26, 33, 16, 27, 19, 16, 18, 19, 32, 37, 34, 37, 34, 28, 28, 27, 25, 24, 27, 26, 26, 29, 27, 22, 22, 25, 30, 26, 22, 22, 14, 15, 12, 22, 36, 46, 46, 43, 41, 45, 44, 42, 41, 40, 40, 41, 44, 45, 46, 47, 49, 49, 51, 48, 49, 45, 34, 47, 47, 39, 45, 47, 37, 38, 46, 48, 36, 36, 38, 34, 27, 31, 45, 42, 42, 43, 44, 45, 46, 46, 48, 48, 49, 50, 49, 49, 49, 52, 52, 52, 52, 52, 52, 51, 49, 49, 49, 49, 49, 49, 48, 47, 48, 51, 51, 46, 38, 28, 30, 33, 38, 41, 43, 45, 46, 46, 46, 46, 47, 48, 49, 50, 53, 53, 54, 46, 54, 48, 47, 47, 47, 47, 48, 48, 50, 52, 52, 53, 54, 54, 54, 53, 53, 54, 54, 54, 53, 53, 51, 51, 50, 49, 48, 48, 46, 47, 48, 48, 49, 48, 48, 48, 50, 47, 49, 51, 64, 47, 51, 44, 46, 45, 47, 61, 51, 41, 48, 63, 43, 64, 57, 66, 64, 59, 53, 55, 48, 36, 51, 56, 57, 92, 96, 102, 88, 73, 81, 77, 82, 80, 88, 98, 71, 142, 183, 163, 68, 186, 170, 210, 208, 213, 214, 54, 37, 53, 31, 21, 33, 49, 54, 54, 56, 73, 61, 54, 96, 109, 108, 112, 59, 45, 31, 42, 65, 76, 78, 71, 80, 135, 154, 107, 127, 191, 196, 187, 146, 149, 123, 76, 41, 34, 37, 50, 62, 64, 64, 74, 44, 28, 13, 10, 12, 19, 26, 40, 42, 36, 40, 39, 31, 30, 30, 30, 30, 32, 30, 29, 31, 30, 26, 27, 33, 34, 23, 20, 22, 14, 12, 16, 32, 41, 41, 44, 45, 38, 46, 44, 42, 40, 39, 40, 43, 47, 46, 47, 48, 48, 47, 46, 43, 44, 41, 32, 46, 49, 42, 46, 47, 36, 35, 41, 40, 35, 35, 36, 32, 26, 31, 44, 42, 43, 45, 46, 45, 44, 42, 46, 47, 48, 50, 50, 50, 51, 52, 52, 52, 52, 53, 53, 51, 49, 49, 49, 49, 49, 49, 49, 47, 46, 48, 48, 38, 24, 35, 29, 33, 33, 40, 43, 40, 44, 45, 46, 45, 46, 47, 49, 44, 48, 50, 53, 46, 52, 48, 49, 50, 50, 49, 49, 48, 49, 50, 51, 51, 52, 52, 52, 51, 50, 51, 51, 51, 51, 50, 50, 49, 48, 48, 47, 47, 46, 48, 48, 49, 49, 48, 48, 48, 52, 47, 46, 47, 59, 45, 49, 44, 47, 40, 45, 66, 49, 35, 52, 53, 48, 63, 51, 63, 56, 48, 43, 49, 33, 37, 41, 38, 57, 69, 58, 73, 54, 67, 71, 53, 89, 75, 110, 120, 88, 171, 204, 159, 96, 238, 210, 211, 215, 216, 199, 32, 33, 35, 36, 40, 45, 94, 103, 120, 139, 155, 135, 112, 129, 132, 134, 137, 145, 90, 41, 60, 63, 68, 71, 79, 84, 66, 76, 63, 83, 118, 204, 185, 89, 36, 74, 37, 42, 52, 23, 78, 158, 108, 108, 126, 75, 26, 20, 8, 19, 28, 39, 34, 23, 32, 40, 32, 31, 33, 33, 33, 35, 33, 31, 33, 32, 30, 33, 40, 38, 22, 19, 23, 17, 16, 30, 44, 46, 40, 43, 45, 37, 46, 45, 42, 40, 39, 42, 46, 49, 47, 48, 49, 49, 46, 41, 36, 38, 37, 36, 45, 51, 44, 44, 44, 39, 40, 46, 45, 41, 37, 31, 25, 21, 28, 44, 43, 44, 46, 47, 45, 43, 41, 45, 46, 48, 50, 51, 52, 52, 51, 51, 52, 52, 53, 53, 51, 50, 50, 50, 50, 50, 50, 50, 48, 45, 44, 40, 27, 14, 38, 30, 32, 30, 39, 43, 38, 43, 44, 44, 43, 43, 45, 46, 36, 43, 48, 52, 46, 53, 49, 49, 50, 50, 51, 50, 49, 48, 49, 49, 50, 50, 51, 51, 49, 49, 50, 50, 50, 49, 49, 48, 48, 47, 46, 46, 46, 45, 48, 48, 49, 49, 48, 47, 47, 51, 46, 45, 45, 50, 45, 47, 47, 50, 41, 45, 66, 48, 32, 54, 45, 54, 60, 47, 59, 35, 33, 29, 34, 24, 49, 37, 39, 49, 51, 68, 53, 38, 67, 61, 89, 72, 96, 144, 162, 123, 157, 157, 105, 146, 207, 191, 208, 218, 222, 202, 41, 20, 40, 73, 108, 119, 121, 136, 133, 126, 138, 123, 138, 156, 139, 145, 138, 123, 180, 185, 116, 47, 79, 81, 66, 82, 72, 53, 48, 91, 106, 188, 161, 84, 74, 70, 40, 22, 38, 17, 116, 116, 42, 45, 77, 57, 40, 76, 45, 52, 51, 49, 37, 28, 31, 28, 22, 23, 26, 25, 23, 30, 32, 29, 30, 30, 31, 36, 42, 41, 24, 18, 22, 21, 25, 41, 45, 46, 42, 41, 42, 41, 46, 45, 42, 40, 40, 44, 48, 49, 47, 47, 50, 50, 46, 38, 32, 35, 38, 42, 41, 46, 46, 41, 39, 39, 44, 50, 52, 43, 36, 27, 22, 20, 29, 44, 44, 44, 45, 45, 45, 45, 45, 45, 47, 49, 50, 51, 51, 51, 50, 50, 51, 52, 52, 52, 51, 50, 50, 50, 50, 50, 50, 51, 51, 49, 43, 33, 23, 16, 36, 34, 31, 31, 37, 40, 40, 40, 42, 43, 41, 40, 42, 44, 34, 42, 47, 52, 47, 54, 47, 44, 45, 48, 49, 49, 48, 48, 47, 47, 48, 48, 49, 49, 48, 49, 50, 50, 50, 49, 48, 46, 46, 46, 45, 45, 45, 45, 47, 47, 47, 47, 46, 45, 44, 47, 47, 46, 48, 43, 47, 46, 47, 51, 46, 44, 58, 44, 35, 53, 45, 57, 58, 44, 51, 41, 46, 38, 41, 41, 70, 58, 39, 43, 64, 60, 55, 45, 68, 15, 63, 75, 136, 219, 141, 221, 226, 199, 120, 229, 210, 225, 221, 209, 224, 214, 80, 109, 125, 126, 127, 124, 141, 122, 129, 139, 139, 133, 120, 135, 129, 135, 137, 165, 133, 137, 98, 54, 61, 85, 78, 62, 61, 69, 49, 50, 62, 112, 171, 64, 66, 19, 23, 33, 28, 28, 68, 60, 58, 71, 55, 36, 14, 37, 21, 26, 23, 25, 27, 35, 42, 31, 27, 31, 36, 33, 29, 31, 30, 25, 26, 27, 29, 35, 42, 43, 27, 19, 22, 25, 34, 46, 40, 42, 45, 40, 38, 46, 46, 45, 43, 40, 40, 46, 50, 48, 47, 47, 50, 50, 47, 38, 34, 36, 40, 48, 37, 39, 49, 44, 36, 35, 38, 40, 42, 39, 32, 26, 24, 25, 33, 45, 45, 44, 43, 43, 45, 47, 49, 46, 47, 48, 50, 50, 50, 50, 49, 50, 51, 51, 52, 52, 51, 50, 50, 50, 50, 50, 50, 51, 53, 53, 43, 31, 25, 26, 33, 36, 31, 34, 36, 39, 42, 39, 41, 41, 39, 38, 39, 41, 32, 40, 45, 50, 43, 49, 43, 41, 44, 47, 50, 50, 50, 48, 46, 46, 46, 47, 47, 48, 49, 50, 50, 51, 50, 50, 49, 45, 45, 45, 45, 44, 44, 44, 45, 46, 46, 46, 44, 43, 43, 45, 48, 50, 52, 41, 51, 45, 44, 48, 49, 42, 47, 40, 38, 49, 48, 56, 52, 39, 42, 48, 52, 33, 36, 37, 52, 49, 42, 43, 34, 52, 58, 44, 63, 68, 44, 25, 116, 212, 146, 221, 213, 211, 194, 152, 177, 197, 229, 217, 225, 207, 119, 119, 137, 131, 126, 125, 114, 120, 117, 129, 124, 143, 124, 128, 127, 141, 135, 114, 79, 110, 114, 91, 58, 77, 70, 71, 69, 73, 56, 55, 51, 75, 163, 52, 49, 25, 32, 28, 27, 64, 71, 76, 84, 49, 43, 60, 25, 33, 23, 34, 38, 55, 31, 34, 34, 40, 48, 42, 32, 28, 37, 30, 33, 40, 32, 24, 31, 36, 38, 45, 37, 28, 29, 31, 40, 48, 45, 40, 46, 44, 35, 47, 47, 42, 43, 44, 39, 43, 52, 48, 45, 46, 49, 49, 43, 35, 32, 32, 35, 42, 37, 35, 36, 37, 42, 45, 43, 38, 35, 34, 29, 25, 27, 33, 39, 47, 47, 46, 47, 47, 47, 47, 47, 48, 49, 49, 49, 49, 48, 48, 50, 50, 50, 50, 51, 51, 50, 51, 52, 50, 51, 51, 47, 49, 53, 51, 38, 26, 26, 34, 31, 35, 33, 32, 34, 38, 40, 40, 42, 42, 42, 43, 39, 43, 36, 43, 44, 45, 44, 48, 44, 43, 45, 47, 48, 49, 50, 48, 47, 47, 47, 47, 47, 47, 49, 49, 49, 49, 49, 49, 49, 46, 45, 45, 44, 43, 43, 43, 44, 45, 47, 48, 48, 49, 48, 48, 51, 52, 50, 44, 48, 44, 40, 47, 50, 44, 42, 42, 40, 47, 42, 46, 50, 43, 39, 49, 57, 45, 47, 38, 38, 40, 30, 39, 42, 55, 61, 53, 55, 83, 91, 71, 149, 181, 192, 224, 227, 224, 209, 121, 121, 151, 197, 204, 176, 145, 128, 110, 136, 131, 124, 117, 97, 113, 108, 130, 119, 156, 119, 124, 126, 135, 133, 96, 42, 70, 107, 103, 64, 73, 65, 78, 72, 70, 65, 74, 58, 67, 151, 55, 35, 40, 28, 32, 22, 54, 90, 95, 85, 46, 49, 60, 32, 51, 36, 33, 38, 71, 30, 44, 30, 44, 44, 30, 29, 29, 38, 29, 32, 37, 33, 23, 31, 34, 39, 46, 37, 28, 32, 35, 42, 46, 47, 41, 45, 44, 36, 47, 47, 40, 43, 47, 42, 46, 54, 47, 45, 45, 48, 47, 40, 34, 30, 28, 31, 36, 37, 34, 32, 36, 43, 44, 40, 35, 32, 29, 27, 28, 33, 38, 42, 46, 48, 48, 49, 49, 48, 48, 47, 50, 51, 51, 50, 49, 48, 48, 50, 50, 50, 50, 50, 50, 49, 51, 52, 50, 51, 53, 48, 49, 50, 44, 33, 24, 26, 34, 31, 34, 35, 31, 33, 37, 38, 41, 43, 41, 41, 45, 39, 44, 38, 44, 43, 43, 46, 48, 46, 45, 46, 47, 47, 48, 49, 48, 47, 47, 47, 47, 47, 47, 48, 49, 48, 48, 48, 48, 49, 47, 46, 45, 44, 43, 43, 42, 41, 43, 45, 48, 50, 51, 51, 50, 52, 52, 48, 45, 46, 44, 43, 50, 51, 46, 42, 44, 39, 45, 41, 39, 49, 52, 37, 39, 54, 55, 51, 31, 28, 37, 25, 38, 51, 55, 56, 54, 50, 70, 150, 139, 156, 160, 204, 180, 209, 224, 210, 106, 84, 103, 135, 150, 127, 90, 111, 99, 130, 127, 113, 98, 100, 104, 100, 131, 116, 156, 105, 119, 121, 123, 135, 118, 22, 40, 81, 75, 62, 66, 65, 74, 68, 74, 76, 79, 67, 75, 138, 54, 37, 64, 14, 31, 22, 29, 74, 73, 70, 49, 56, 36, 31, 47, 41, 24, 21, 57, 28, 62, 33, 41, 46, 50, 66, 44, 35, 36, 34, 28, 36, 23, 27, 25, 40, 44, 26, 19, 30, 37, 44, 43, 44, 43, 43, 43, 42, 46, 47, 41, 41, 45, 45, 47, 50, 46, 45, 45, 46, 44, 38, 32, 27, 27, 29, 32, 35, 36, 38, 38, 36, 33, 31, 30, 30, 24, 27, 35, 41, 42, 43, 44, 47, 47, 48, 49, 49, 49, 48, 52, 52, 52, 52, 51, 50, 50, 50, 50, 50, 50, 50, 50, 50, 50, 50, 47, 50, 55, 53, 50, 45, 36, 29, 25, 27, 29, 31, 35, 35, 32, 34, 37, 38, 40, 43, 39, 37, 43, 41, 43, 39, 43, 42, 42, 46, 46, 47, 46, 46, 47, 47, 47, 47, 47, 47, 47, 47, 47, 47, 47, 47, 47, 47, 46, 46, 47, 48, 47, 46, 46, 45, 44, 43, 42, 39, 41, 43, 45, 47, 49, 49, 51, 52, 51, 48, 45, 45, 47, 50, 52, 50, 47, 45, 46, 40, 41, 40, 44, 48, 52, 35, 27, 42, 52, 42, 23, 21, 34, 28, 38, 47, 50, 52, 52, 47, 61, 166, 175, 132, 136, 168, 117, 163, 203, 199, 96, 79, 72, 85, 95, 96, 68, 90, 75, 99, 96, 88, 71, 101, 100, 83, 105, 93, 126, 94, 110, 109, 108, 125, 119, 15, 51, 72, 31, 48, 54, 67, 74, 71, 84, 83, 66, 68, 81, 115, 36, 60, 88, 16, 24, 31, 39, 17, 43, 67, 26, 46, 27, 37, 13, 33, 29, 24, 35, 37, 71, 37, 35, 82, 132, 148, 72, 43, 51, 43, 31, 46, 25, 25, 16, 36, 37, 16, 12, 29, 39, 44, 42, 41, 45, 42, 43, 49, 42, 50, 44, 40, 40, 43, 42, 41, 47, 47, 46, 44, 39, 34, 28, 24, 26, 28, 29, 32, 36, 39, 36, 31, 27, 27, 28, 27, 19, 29, 43, 48, 45, 43, 43, 46, 46, 48, 50, 50, 50, 50, 53, 53, 53, 53, 53, 52, 51, 50, 50, 50, 50, 50, 50, 50, 50, 48, 46, 50, 55, 55, 49, 41, 31, 26, 28, 28, 26, 31, 36, 37, 34, 35, 38, 38, 38, 43, 38, 34, 42, 43, 42, 40, 42, 40, 41, 46, 44, 49, 47, 47, 47, 46, 46, 46, 46, 47, 47, 47, 47, 47, 47, 47, 46, 46, 45, 45, 46, 47, 48, 47, 47, 46, 45, 44, 43, 38, 38, 41, 43, 45, 47, 48, 50, 51, 50, 48, 45, 45, 48, 51, 50, 49, 48, 47, 47, 45, 37, 38, 59, 45, 38, 34, 26, 29, 37, 30, 26, 24, 26, 31, 32, 35, 45, 56, 57, 46, 73, 120, 159, 108, 97, 120, 86, 124, 160, 155, 93, 91, 70, 76, 75, 74, 65, 66, 50, 60, 59, 65, 49, 90, 84, 52, 55, 58, 64, 75, 82, 72, 48, 67, 86, 27, 59, 73, 30, 61, 69, 92, 92, 92, 71, 75, 55, 64, 54, 70, 30, 85, 30, 53, 75, 12, 31, 16, 131, 88, 43, 41, 36, 58, 30, 27, 44, 58, 27, 44, 54, 60, 36, 80, 161, 174, 120, 80, 43, 30, 18, 36, 18, 39, 41, 36, 32, 17, 17, 34, 42, 45, 44, 39, 44, 40, 44, 53, 35, 57, 53, 46, 45, 51, 49, 44, 49, 50, 48, 41, 35, 30, 24, 21, 27, 30, 28, 29, 33, 33, 30, 28, 29, 30, 28, 23, 18, 34, 49, 50, 44, 43, 44, 45, 46, 47, 50, 51, 51, 51, 52, 53, 53, 54, 53, 52, 51, 50, 50, 50, 50, 50, 50, 50, 48, 46, 46, 49, 52, 52, 45, 38, 30, 27, 29, 30, 27, 32, 38, 38, 36, 37, 39, 38, 36, 42, 39, 35, 42, 45, 39, 40, 41, 39, 40, 44, 43, 50, 49, 48, 47, 46, 45, 44, 45, 46, 46, 46, 46, 46, 46, 46, 46, 45, 45, 45, 45, 47, 48, 48, 47, 46, 45, 44, 44, 37, 38, 39, 41, 44, 46, 48, 47, 48, 49, 48, 47, 46, 46, 47, 45, 46, 48, 48, 46, 49, 43, 50, 70, 38, 30, 36, 35, 30, 35, 27, 34, 30, 20, 36, 27, 25, 44, 65, 63, 43, 71, 73, 107, 61, 79, 104, 70, 85, 102, 90, 87, 87, 77, 68, 56, 53, 51, 54, 44, 45, 49, 64, 43, 66, 69, 43, 48, 61, 42, 61, 55, 63, 49, 69, 70, 59, 67, 71, 38, 59, 60, 72, 60, 56, 53, 72, 49, 67, 52, 63, 49, 55, 80, 58, 39, 19, 8, 42, 109, 63, 43, 32, 23, 28, 53, 39, 47, 81, 38, 41, 30, 61, 21, 61, 146, 133, 137, 113, 112, 142, 96, 64, 24, 39, 24, 31, 41, 36, 37, 48, 48, 47, 49, 41, 44, 42, 48, 54, 31, 47, 44, 40, 43, 52, 53, 47, 49, 49, 47, 41, 34, 30, 23, 20, 29, 31, 28, 26, 28, 28, 27, 25, 27, 29, 25, 19, 20, 38, 51, 47, 41, 43, 46, 44, 46, 48, 50, 51, 52, 52, 50, 51, 52, 52, 52, 51, 51, 50, 50, 50, 50, 50, 50, 49, 47, 47, 49, 49, 47, 43, 39, 36, 33, 30, 29, 29, 29, 33, 38, 39, 36, 37, 39, 37, 34, 40, 41, 39, 43, 45, 38, 40, 40, 39, 40, 42, 42, 50, 48, 47, 46, 45, 44, 43, 45, 46, 46, 46, 46, 46, 46, 47, 47, 46, 45, 45, 46, 47, 48, 48, 47, 47, 45, 44, 44, 39, 39, 39, 41, 43, 46, 47, 44, 45, 47, 48, 49, 47, 46, 45, 43, 45, 50, 48, 43, 43, 55, 64, 56, 37, 55, 42, 39, 43, 49, 34, 34, 31, 26, 36, 32, 32, 46, 62, 57, 39, 59, 73, 92, 38, 78, 83, 63, 58, 77, 74, 76, 66, 71, 55, 54, 74, 54, 59, 50, 40, 45, 60, 47, 55, 62, 46, 59, 65, 48, 57, 46, 53, 55, 72, 41, 56, 54, 62, 53, 61, 60, 64, 51, 46, 49, 59, 28, 49, 43, 49, 42, 73, 64, 37, 22, 29, 21, 48, 34, 43, 33, 40, 28, 33, 43, 38, 39, 60, 34, 46, 31, 43, 33, 59, 108, 97, 85, 119, 143, 158, 118, 86, 65, 84, 58, 41, 50, 49, 48, 52, 47, 44, 51, 43, 44, 46, 50, 52, 34, 45, 40, 38, 41, 47, 47, 46, 46, 46, 44, 40, 34, 30, 22, 20, 28, 31, 27, 24, 26, 28, 27, 23, 21, 21, 20, 18, 20, 38, 51, 44, 39, 43, 48, 45, 46, 48, 50, 52, 52, 52, 49, 50, 51, 51, 51, 51, 50, 50, 50, 50, 50, 50, 50, 49, 48, 48, 52, 50, 42, 36, 33, 35, 36, 33, 28, 27, 30, 33, 38, 39, 36, 37, 38, 36, 34, 37, 42, 44, 42, 43, 38, 39, 38, 40, 40, 40, 43, 49, 48, 47, 46, 45, 44, 43, 44, 45, 45, 45, 45, 45, 45, 46, 46, 46, 45, 45, 46, 47, 48, 47, 47, 46, 44, 44, 43, 41, 40, 40, 41, 42, 44, 46, 44, 43, 45, 47, 49, 47, 47, 47, 47, 48, 50, 46, 39, 41, 52, 50, 44, 44, 63, 43, 36, 38, 38, 30, 37, 38, 30, 24, 33, 42, 49, 55, 55, 51, 62, 64, 75, 40, 71, 49, 69, 58, 68, 74, 64, 61, 74, 61, 46, 58, 62, 60, 53, 40, 47, 49, 50, 51, 53, 45, 57, 51, 48, 53, 53, 54, 48, 62, 31, 59, 46, 47, 57, 55, 55, 56, 51, 45, 56, 66, 47, 46, 38, 44, 51, 48, 39, 33, 32, 44, 36, 51, 27, 33, 30, 39, 21, 48, 30, 31, 33, 33, 28, 47, 38, 28, 33, 51, 79, 104, 39, 77, 94, 88, 79, 70, 75, 103, 83, 51, 55, 53, 50, 51, 45, 44, 48, 46, 46, 50, 52, 47, 43, 54, 47, 46, 47, 46, 46, 49, 45, 43, 41, 39, 33, 26, 20, 20, 26, 28, 26, 25, 27, 28, 27, 23, 19, 17, 17, 19, 15, 34, 49, 44, 41, 45, 48, 45, 47, 49, 50, 52, 52, 52, 48, 49, 50, 51, 51, 51, 50, 50, 50, 50, 50, 50, 50, 50, 49, 49, 54, 51, 40, 32, 31, 35, 39, 36, 30, 29, 31, 33, 38, 39, 36, 36, 37, 36, 35, 33, 40, 45, 39, 41, 39, 38, 38, 41, 40, 38, 44, 47, 47, 46, 45, 45, 44, 43, 44, 45, 45, 45, 45, 45, 45, 46, 45, 45, 44, 45, 45, 46, 47, 46, 46, 45, 44, 43, 42, 42, 41, 40, 40, 41, 43, 44, 45, 44, 44, 47, 48, 46, 46, 49, 48, 48, 48, 44, 38, 43, 46, 35, 42, 49, 52, 38, 34, 32, 23, 24, 38, 43, 31, 17, 33, 47, 52, 57, 62, 64, 63, 59, 53, 41, 63, 42, 67, 59, 57, 65, 51, 57, 77, 66, 49, 48, 71, 48, 48, 45, 57, 40, 48, 46, 44, 42, 49, 37, 44, 51, 65, 55, 41, 56, 33, 58, 47, 39, 55, 48, 49, 44, 49, 41, 62, 69, 63, 39, 36, 44, 57, 24, 34, 38, 38, 40, 41, 43, 49, 49, 31, 37, 14, 50, 31, 31, 32, 26, 32, 33, 36, 32, 26, 44, 55, 98, 22, 40, 40, 37, 49, 47, 54, 79, 77, 57, 58, 50, 45, 49, 48, 49, 43, 48, 48, 53, 51, 43, 54, 57, 49, 49, 50, 44, 44, 52, 48, 43, 38, 36, 29, 20, 17, 21, 23, 24, 24, 26, 30, 28, 25, 24, 21, 18, 19, 21, 9, 29, 48, 46, 45, 48, 46, 46, 48, 49, 50, 51, 51, 51, 48, 49, 51, 51, 51, 51, 51, 50, 50, 50, 50, 50, 50, 51, 51, 50, 55, 50, 39, 32, 34, 38, 41, 39, 34, 32, 32, 33, 37, 39, 36, 36, 37, 35, 37, 29, 37, 45, 36, 39, 41, 37, 37, 42, 41, 36, 45, 45, 46, 46, 45, 45, 44, 44, 44, 45, 45, 45, 45, 45, 45, 45, 44, 44, 43, 43, 44, 44, 46, 46, 45, 44, 43, 42, 42, 43, 41, 39, 38, 39, 41, 43, 47, 45, 45, 46, 47, 43, 43, 48, 47, 46, 45, 43, 40, 45, 50, 39, 46, 47, 38, 30, 34, 38, 25, 25, 32, 39, 31, 25, 36, 47, 56, 65, 70, 69, 63, 55, 42, 51, 49, 51, 66, 57, 54, 59, 49, 48, 78, 56, 62, 64, 61, 34, 40, 48, 68, 35, 44, 38, 40, 48, 44, 37, 45, 51, 64, 47, 41, 56, 34, 43, 46, 40, 51, 44, 44, 34, 42, 38, 68, 59, 52, 27, 39, 44, 48, 38, 39, 44, 27, 28, 36, 29, 50, 66, 33, 39, 19, 38, 43, 38, 31, 33, 41, 15, 24, 47, 23, 42, 37, 55, 32, 43, 34, 41, 47, 38, 30, 44, 54, 54, 57, 49, 44, 49, 51, 53, 40, 50, 49, 54, 50, 42, 54, 45, 47, 55, 57, 42, 45, 52, 50, 39, 36, 31, 23, 14, 14, 22, 21, 21, 22, 25, 29, 22, 19, 23, 22, 19, 19, 21, 5, 22, 45, 46, 48, 50, 45, 46, 47, 49, 50, 50, 50, 50, 49, 49, 50, 51, 52, 51, 51, 50, 50, 49, 49, 51, 50, 52, 51, 50, 55, 49, 38, 34, 39, 42, 43, 41, 39, 35, 33, 32, 36, 38, 36, 35, 35, 33, 38, 29, 35, 42, 34, 38, 42, 35, 37, 43, 41, 37, 43, 42, 44, 45, 45, 44, 44, 44, 44, 45, 45, 45, 45, 45, 45, 45, 44, 43, 41, 42, 43, 44, 46, 46, 45, 45, 44, 43, 43, 45, 41, 40, 40, 37, 40, 43, 49, 45, 44, 46, 45, 42, 42, 45, 45, 44, 42, 42, 44, 45, 56, 55, 47, 42, 31, 24, 35, 51, 40, 34, 26, 30, 31, 39, 41, 46, 58, 71, 73, 63, 62, 53, 46, 68, 37, 55, 66, 53, 62, 58, 58, 49, 83, 41, 77, 86, 34, 42, 38, 35, 59, 33, 42, 32, 43, 62, 35, 47, 55, 41, 45, 40, 35, 39, 34, 34, 38, 38, 38, 41, 45, 33, 41, 54, 90, 62, 54, 46, 48, 49, 55, 55, 17, 53, 29, 53, 24, 38, 33, 37, 41, 35, 25, 33, 50, 39, 28, 24, 30, 13, 24, 38, 19, 34, 39, 25, 56, 56, 46, 27, 15, 35, 37, 43, 52, 46, 50, 52, 50, 50, 50, 44, 45, 51, 50, 54, 50, 44, 34, 31, 74, 99, 99, 63, 67, 52, 45, 25, 31, 22, 15, 13, 17, 24, 22, 20, 19, 16, 16, 13, 10, 9, 13, 12, 13, 10, 9, 12, 7, 16, 38, 39, 49, 52, 45, 43, 46, 49, 49, 47, 46, 47, 47, 48, 50, 51, 51, 51, 50, 50, 50, 47, 48, 53, 52, 51, 50, 49, 53, 45, 36, 41, 46, 45, 43, 40, 39, 36, 32, 32, 34, 36, 36, 35, 32, 30, 36, 36, 36, 36, 38, 41, 42, 34, 36, 42, 38, 45, 35, 37, 40, 46, 45, 42, 44, 43, 43, 44, 45, 45, 45, 45, 45, 47, 46, 42, 40, 41, 44, 46, 46, 46, 47, 48, 47, 47, 46, 50, 42, 45, 47, 35, 41, 48, 49, 42, 43, 46, 44, 43, 45, 43, 44, 44, 41, 42, 47, 46, 41, 50, 42, 45, 29, 20, 32, 48, 40, 42, 36, 28, 28, 44, 44, 42, 51, 68, 69, 53, 56, 58, 51, 62, 56, 49, 53, 51, 63, 45, 64, 80, 100, 49, 82, 75, 29, 40, 37, 34, 38, 25, 32, 34, 24, 45, 33, 47, 36, 45, 50, 48, 54, 41, 46, 51, 34, 28, 35, 37, 47, 41, 40, 35, 48, 47, 30, 42, 43, 61, 56, 44, 30, 38, 35, 50, 30, 41, 20, 36, 29, 16, 26, 34, 26, 36, 59, 31, 18, 30, 26, 14, 27, 33, 18, 38, 35, 38, 52, 38, 29, 36, 41, 49, 54, 50, 52, 52, 48, 49, 50, 46, 51, 35, 56, 61, 43, 48, 37, 43, 118, 166, 158, 142, 103, 61, 38, 43, 20, 18, 34, 13, 10, 11, 24, 22, 21, 18, 15, 14, 13, 10, 9, 12, 11, 9, 9, 11, 9, 20, 36, 37, 40, 46, 51, 49, 50, 50, 46, 43, 41, 43, 49, 49, 50, 50, 49, 48, 48, 48, 49, 47, 49, 52, 49, 46, 49, 50, 41, 33, 34, 41, 44, 43, 40, 38, 36, 33, 29, 32, 33, 34, 35, 34, 32, 29, 40, 38, 38, 40, 42, 39, 37, 38, 38, 37, 38, 36, 36, 36, 41, 47, 47, 45, 47, 45, 45, 48, 48, 47, 46, 45, 44, 45, 45, 45, 45, 46, 47, 48, 46, 46, 47, 47, 46, 45, 45, 51, 42, 43, 46, 39, 41, 47, 49, 42, 43, 47, 45, 44, 45, 43, 44, 44, 43, 43, 45, 39, 30, 35, 30, 40, 30, 23, 27, 36, 25, 33, 35, 29, 28, 36, 38, 40, 47, 56, 56, 47, 40, 48, 51, 55, 53, 37, 44, 52, 55, 46, 59, 59, 90, 58, 45, 66, 90, 71, 48, 41, 36, 28, 24, 40, 34, 39, 36, 53, 23, 51, 50, 48, 46, 21, 36, 48, 33, 32, 43, 40, 47, 41, 40, 33, 35, 43, 38, 44, 43, 68, 50, 35, 27, 30, 32, 37, 40, 32, 32, 22, 24, 27, 20, 18, 25, 23, 49, 31, 19, 26, 23, 13, 27, 27, 12, 42, 23, 35, 55, 46, 43, 43, 50, 53, 52, 51, 52, 50, 46, 48, 50, 48, 44, 54, 46, 62, 46, 53, 32, 72, 153, 163, 161, 156, 132, 123, 83, 49, 13, 11, 18, 8, 19, 22, 22, 20, 19, 15, 13, 13, 10, 9, 13, 10, 13, 10, 8, 9, 11, 11, 17, 26, 32, 34, 38, 44, 44, 46, 46, 45, 44, 46, 47, 50, 51, 51, 50, 49, 48, 47, 46, 48, 48, 49, 51, 47, 44, 49, 48, 31, 24, 34, 43, 44, 41, 39, 38, 36, 33, 29, 30, 31, 33, 33, 33, 31, 29, 40, 37, 39, 44, 46, 40, 35, 42, 40, 34, 38, 31, 40, 40, 47, 52, 50, 46, 44, 40, 43, 48, 48, 47, 46, 46, 45, 42, 42, 44, 45, 45, 43, 41, 46, 46, 46, 46, 45, 44, 43, 49, 41, 40, 44, 42, 39, 45, 48, 43, 44, 47, 46, 46, 46, 44, 44, 45, 45, 44, 43, 45, 40, 41, 34, 46, 38, 31, 29, 33, 17, 28, 35, 32, 29, 31, 35, 42, 48, 49, 49, 49, 42, 49, 59, 53, 55, 38, 48, 52, 50, 45, 56, 53, 76, 74, 85, 48, 68, 96, 53, 43, 45, 39, 26, 46, 54, 40, 37, 58, 23, 62, 49, 49, 37, 23, 36, 45, 38, 45, 50, 44, 41, 31, 39, 46, 40, 35, 52, 41, 37, 55, 32, 28, 30, 21, 30, 29, 36, 28, 33, 27, 25, 27, 25, 21, 20, 14, 26, 26, 25, 14, 19, 23, 20, 20, 20, 30, 19, 39, 49, 49, 51, 49, 57, 51, 48, 49, 50, 48, 46, 48, 49, 49, 48, 49, 47, 56, 35, 64, 37, 156, 168, 163, 157, 145, 141, 118, 116, 68, 23, 9, 17, 11, 13, 20, 20, 20, 19, 16, 14, 11, 13, 10, 9, 9, 8, 11, 13, 18, 12, 18, 29, 35, 35, 37, 38, 41, 44, 45, 46, 49, 51, 52, 53, 52, 51, 50, 49, 48, 47, 48, 48, 48, 51, 47, 44, 48, 43, 27, 25, 38, 47, 46, 42, 41, 40, 39, 36, 32, 31, 31, 32, 33, 32, 31, 30, 36, 35, 38, 44, 46, 42, 37, 42, 39, 34, 38, 33, 44, 40, 36, 41, 44, 45, 45, 44, 42, 42, 43, 42, 43, 42, 43, 44, 47, 49, 50, 49, 46, 43, 45, 46, 46, 46, 44, 43, 42, 48, 40, 38, 41, 44, 37, 43, 47, 44, 45, 47, 46, 47, 47, 44, 43, 45, 47, 45, 41, 45, 42, 42, 32, 42, 34, 28, 33, 36, 17, 26, 33, 31, 28, 30, 32, 41, 48, 45, 46, 54, 47, 47, 56, 42, 46, 38, 49, 50, 47, 41, 54, 62, 61, 78, 151, 67, 72, 87, 49, 39, 51, 49, 41, 49, 63, 42, 40, 61, 32, 72, 45, 48, 40, 50, 45, 45, 36, 49, 49, 43, 35, 25, 42, 57, 55, 40, 68, 49, 42, 49, 30, 30, 33, 21, 28, 28, 29, 26, 28, 32, 27, 22, 27, 24, 15, 14, 17, 22, 26, 11, 16, 25, 15, 16, 27, 16, 20, 39, 42, 50, 53, 53, 58, 46, 48, 49, 48, 49, 49, 50, 50, 49, 51, 37, 49, 41, 36, 55, 85, 191, 158, 161, 161, 153, 140, 121, 126, 71, 22, 6, 17, 19, 16, 20, 20, 20, 18, 15, 13, 11, 13, 10, 9, 9, 11, 14, 16, 24, 11, 18, 26, 34, 34, 35, 35, 39, 44, 46, 47, 48, 49, 50, 51, 52, 52, 51, 50, 50, 48, 48, 47, 48, 51, 48, 46, 44, 34, 28, 32, 42, 50, 48, 44, 42, 42, 41, 39, 36, 32, 31, 32, 33, 32, 32, 31, 31, 34, 37, 40, 42, 42, 41, 40, 38, 36, 36, 38, 43, 39, 29, 33, 38, 42, 43, 43, 43, 44, 44, 44, 44, 44, 44, 46, 47, 49, 49, 48, 46, 45, 45, 45, 45, 45, 44, 43, 42, 46, 39, 36, 39, 44, 36, 41, 46, 46, 46, 46, 46, 47, 46, 44, 43, 45, 48, 46, 40, 44, 46, 50, 39, 45, 36, 33, 37, 41, 21, 24, 28, 26, 27, 32, 29, 35, 42, 41, 43, 53, 54, 45, 52, 34, 37, 38, 48, 47, 46, 39, 50, 67, 45, 67, 161, 93, 87, 55, 46, 38, 50, 54, 59, 49, 56, 46, 48, 61, 41, 73, 42, 49, 55, 78, 49, 44, 26, 39, 42, 39, 35, 33, 50, 59, 62, 53, 68, 60, 49, 48, 37, 36, 29, 28, 25, 27, 24, 24, 24, 25, 26, 24, 20, 17, 17, 19, 21, 22, 24, 16, 13, 16, 14, 17, 28, 17, 28, 38, 42, 51, 50, 52, 53, 42, 52, 51, 48, 51, 53, 53, 50, 49, 47, 37, 42, 31, 59, 72, 139, 173, 143, 154, 162, 151, 145, 121, 98, 47, 16, 14, 15, 20, 26, 24, 22, 20, 17, 13, 13, 10, 13, 10, 13, 10, 9, 13, 10, 15, 18, 19, 24, 12, 21, 19, 24, 27, 33, 31, 38, 44, 47, 48, 46, 46, 47, 48, 50, 50, 50, 50, 50, 49, 50, 47, 48, 50, 48, 45, 37, 26, 32, 40, 43, 49, 48, 45, 42, 42, 42, 40, 37, 32, 32, 32, 33, 33, 33, 33, 30, 34, 36, 35, 35, 39, 43, 38, 37, 37, 33, 41, 37, 40, 37, 36, 39, 40, 38, 37, 41, 45, 45, 44, 44, 42, 42, 40, 39, 39, 40, 41, 43, 43, 43, 44, 44, 44, 44, 42, 42, 43, 38, 34, 37, 43, 36, 40, 45, 47, 46, 45, 45, 45, 44, 43, 44, 46, 48, 46, 40, 43, 48, 56, 46, 47, 37, 37, 38, 43, 24, 24, 23, 22, 28, 34, 27, 28, 35, 36, 39, 47, 61, 48, 53, 37, 38, 39, 48, 46, 44, 40, 43, 60, 34, 59, 124, 118, 89, 31, 54, 50, 47, 55, 67, 48, 48, 54, 62, 59, 45, 61, 41, 56, 73, 83, 39, 43, 22, 26, 37, 36, 43, 49, 61, 54, 50, 58, 44, 55, 42, 35, 28, 35, 21, 32, 21, 25, 20, 19, 23, 16, 25, 28, 14, 13, 10, 22, 19, 21, 24, 25, 16, 13, 10, 13, 10, 19, 23, 24, 37, 42, 43, 51, 51, 47, 49, 46, 43, 58, 54, 49, 52, 55, 52, 48, 48, 46, 49, 29, 43, 95, 152, 148, 170, 149, 152, 151, 110, 148, 61, 34, 16, 22, 37, 20, 7, 24, 28, 25, 20, 15, 11, 8, 13, 10, 13, 10, 13, 10, 14, 17, 19, 19, 17, 17, 23, 15, 13, 10, 14, 25, 21, 30, 39, 47, 49, 48, 48, 45, 46, 48, 49, 49, 49, 49, 51, 52, 49, 48, 49, 44, 39, 31, 24, 34, 42, 42, 47, 46, 43, 42, 42, 42, 40, 38, 32, 32, 32, 32, 33, 33, 34, 31, 35, 35, 31, 30, 36, 42, 38, 37, 38, 31, 40, 31, 40, 48, 43, 43, 42, 38, 36, 37, 36, 35, 33, 32, 30, 30, 32, 33, 33, 35, 38, 41, 44, 41, 42, 43, 43, 44, 43, 42, 41, 38, 35, 37, 40, 38, 39, 44, 48, 46, 43, 44, 43, 42, 42, 44, 47, 47, 45, 41, 40, 41, 50, 37, 35, 23, 22, 32, 43, 27, 25, 22, 24, 33, 35, 29, 26, 31, 36, 41, 44, 62, 50, 54, 44, 48, 36, 46, 47, 43, 42, 34, 50, 32, 67, 98, 145, 71, 39, 57, 62, 48, 54, 51, 48, 51, 57, 64, 53, 47, 40, 43, 64, 79, 67, 31, 47, 40, 28, 40, 40, 47, 53, 63, 53, 51, 70, 47, 56, 50, 38, 32, 24, 25, 20, 21, 23, 13, 19, 12, 30, 25, 16, 27, 28, 11, 14, 13, 10, 20, 24, 9, 14, 21, 31, 33, 31, 56, 51, 49, 55, 46, 48, 47, 42, 48, 56, 54, 49, 49, 50, 46, 41, 42, 49, 41, 48, 61, 174, 158, 169, 173, 153, 140, 141, 150, 55, 23, 15, 22, 8, 7, 31, 20, 21, 29, 24, 18, 13, 12, 11, 12, 12, 12, 14, 18, 18, 16, 17, 31, 31, 32, 23, 16, 12, 11, 19, 32, 42, 48, 52, 54, 47, 48, 49, 50, 49, 49, 49, 52, 54, 53, 50, 46, 36, 30, 29, 30, 35, 39, 42, 46, 44, 42, 41, 41, 42, 40, 38, 32, 31, 30, 31, 32, 33, 33, 31, 33, 33, 31, 31, 36, 41, 40, 38, 37, 34, 36, 35, 37, 34, 30, 36, 43, 46, 50, 51, 48, 48, 48, 47, 47, 47, 44, 44, 45, 46, 48, 51, 52, 38, 38, 39, 40, 41, 41, 41, 39, 37, 36, 36, 36, 40, 38, 44, 49, 46, 42, 42, 41, 39, 41, 45, 47, 46, 44, 43, 47, 49, 53, 39, 37, 23, 20, 30, 41, 26, 26, 24, 26, 37, 29, 31, 30, 32, 41, 48, 49, 52, 41, 41, 37, 50, 21, 40, 50, 48, 42, 30, 58, 41, 57, 62, 131, 77, 53, 39, 56, 49, 50, 23, 48, 54, 44, 50, 44, 50, 28, 38, 41, 54, 41, 27, 39, 44, 28, 45, 44, 39, 35, 51, 55, 51, 60, 58, 47, 59, 41, 37, 21, 21, 22, 24, 22, 24, 19, 20, 19, 23, 28, 24, 20, 19, 15, 16, 14, 11, 13, 25, 34, 45, 44, 45, 52, 43, 43, 42, 38, 52, 50, 42, 53, 47, 51, 47, 44, 43, 37, 32, 35, 35, 36, 55, 123, 164, 162, 165, 138, 158, 130, 117, 89, 51, 40, 30, 26, 22, 9, 18, 19, 19, 26, 22, 16, 14, 16, 17, 17, 15, 13, 15, 18, 16, 12, 32, 57, 48, 69, 62, 39, 9, 15, 20, 30, 37, 43, 48, 51, 52, 52, 52, 52, 51, 50, 50, 52, 56, 56, 52, 44, 30, 23, 31, 39, 35, 35, 43, 46, 44, 43, 42, 42, 43, 41, 39, 30, 29, 29, 29, 30, 31, 32, 29, 30, 30, 32, 36, 39, 41, 41, 39, 35, 39, 34, 45, 42, 35, 27, 27, 30, 28, 30, 33, 34, 36, 39, 41, 43, 45, 44, 44, 44, 44, 44, 44, 44, 35, 36, 37, 39, 40, 40, 40, 38, 37, 37, 36, 33, 41, 38, 43, 49, 46, 41, 41, 40, 38, 41, 45, 47, 44, 43, 44, 43, 37, 40, 29, 33, 23, 19, 26, 36, 20, 21, 20, 23, 31, 18, 27, 30, 33, 44, 54, 54, 55, 43, 37, 36, 61, 19, 47, 53, 56, 39, 30, 85, 54, 55, 65, 84, 70, 40, 44, 43, 37, 47, 41, 48, 44, 40, 34, 29, 44, 39, 31, 44, 47, 39, 29, 41, 42, 26, 36, 41, 34, 32, 42, 49, 55, 61, 60, 49, 57, 53, 45, 33, 31, 29, 25, 21, 22, 22, 20, 20, 23, 24, 22, 22, 24, 20, 24, 26, 26, 31, 40, 45, 49, 46, 44, 46, 46, 46, 43, 44, 53, 48, 47, 53, 44, 43, 51, 36, 45, 48, 37, 38, 42, 41, 82, 164, 157, 161, 148, 160, 132, 128, 91, 76, 34, 37, 32, 15, 27, 17, 16, 18, 25, 22, 25, 11, 22, 16, 19, 25, 15, 15, 19, 24, 12, 22, 57, 112, 73, 83, 88, 42, 13, 10, 14, 23, 21, 25, 31, 34, 46, 48, 47, 48, 49, 47, 47, 49, 51, 53, 51, 45, 36, 25, 24, 33, 36, 36, 40, 40, 44, 45, 43, 43, 42, 42, 41, 40, 34, 32, 29, 27, 28, 30, 31, 29, 31, 32, 34, 36, 36, 36, 44, 40, 37, 38, 34, 40, 42, 43, 39, 37, 36, 32, 32, 31, 31, 32, 34, 35, 37, 37, 40, 40, 38, 38, 38, 39, 40, 34, 34, 36, 39, 40, 40, 40, 39, 37, 36, 35, 34, 39, 39, 41, 44, 43, 40, 39, 39, 39, 39, 43, 43, 40, 38, 41, 44, 38, 38, 43, 42, 27, 22, 30, 27, 21, 14, 19, 22, 28, 21, 23, 27, 33, 39, 48, 56, 46, 33, 30, 39, 59, 31, 36, 51, 53, 43, 38, 88, 48, 44, 57, 64, 55, 38, 42, 38, 42, 45, 43, 47, 43, 37, 34, 37, 41, 44, 29, 44, 46, 44, 31, 39, 35, 26, 37, 45, 37, 32, 35, 39, 52, 61, 59, 51, 55, 58, 50, 45, 42, 36, 29, 24, 21, 21, 22, 24, 24, 23, 22, 25, 28, 32, 36, 39, 40, 44, 49, 51, 48, 47, 44, 46, 49, 49, 48, 47, 49, 50, 50, 47, 43, 41, 51, 30, 35, 44, 34, 43, 38, 49, 136, 166, 162, 156, 149, 134, 133, 114, 83, 78, 37, 41, 34, 24, 18, 17, 20, 21, 36, 22, 29, 13, 23, 15, 16, 26, 14, 24, 21, 31, 15, 37, 56, 113, 87, 81, 86, 53, 23, 21, 26, 15, 16, 18, 18, 38, 37, 37, 40, 41, 37, 39, 43, 43, 40, 36, 31, 26, 23, 26, 33, 34, 37, 43, 40, 44, 46, 44, 44, 43, 43, 42, 42, 36, 33, 29, 26, 27, 29, 31, 30, 32, 34, 35, 35, 34, 34, 44, 39, 38, 38, 35, 36, 40, 43, 44, 45, 45, 42, 39, 36, 35, 35, 35, 35, 35, 34, 37, 37, 35, 34, 34, 36, 37, 39, 39, 39, 40, 40, 40, 40, 41, 39, 36, 34, 36, 39, 41, 40, 41, 41, 39, 38, 39, 40, 39, 41, 40, 37, 37, 39, 44, 40, 38, 48, 42, 26, 21, 30, 25, 25, 14, 21, 25, 26, 24, 22, 26, 31, 33, 39, 48, 39, 30, 28, 36, 50, 35, 29, 43, 55, 51, 37, 78, 50, 47, 48, 55, 46, 44, 36, 40, 53, 41, 30, 48, 44, 30, 38, 47, 37, 37, 27, 38, 44, 47, 33, 35, 30, 27, 41, 50, 41, 35, 33, 33, 43, 55, 58, 52, 53, 57, 53, 53, 49, 43, 38, 34, 30, 26, 28, 30, 30, 29, 29, 31, 35, 44, 46, 48, 47, 49, 53, 52, 48, 48, 47, 49, 51, 49, 52, 48, 45, 51, 49, 40, 42, 41, 32, 33, 33, 40, 33, 48, 21, 93, 167, 155, 162, 147, 156, 119, 124, 84, 112, 115, 94, 52, 35, 38, 16, 18, 27, 30, 45, 19, 28, 20, 16, 17, 13, 23, 18, 28, 27, 29, 20, 47, 63, 89, 73, 82, 91, 88, 64, 36, 22, 19, 17, 12, 20, 26, 22, 25, 29, 28, 23, 26, 32, 30, 24, 19, 16, 18, 22, 27, 31, 32, 36, 39, 38, 43, 44, 43, 43, 43, 43, 43, 43, 37, 33, 29, 26, 26, 29, 32, 32, 33, 33, 34, 33, 33, 33, 40, 37, 37, 38, 36, 37, 39, 36, 40, 44, 46, 45, 43, 41, 40, 40, 39, 38, 37, 37, 40, 40, 38, 36, 35, 36, 37, 44, 43, 41, 40, 40, 40, 41, 43, 40, 36, 35, 36, 40, 41, 39, 40, 40, 38, 38, 41, 41, 39, 40, 38, 37, 38, 41, 44, 42, 40, 41, 34, 22, 18, 26, 27, 28, 17, 24, 28, 24, 25, 24, 27, 30, 29, 31, 36, 36, 32, 29, 29, 37, 30, 31, 37, 48, 47, 42, 87, 64, 54, 43, 50, 43, 42, 38, 45, 52, 33, 25, 50, 41, 28, 33, 41, 34, 34, 22, 31, 39, 48, 36, 36, 32, 26, 37, 47, 42, 38, 36, 33, 37, 47, 54, 52, 53, 56, 56, 55, 51, 49, 50, 50, 48, 43, 41, 42, 42, 41, 41, 43, 45, 52, 52, 52, 50, 51, 53, 51, 47, 49, 50, 51, 52, 48, 52, 50, 45, 46, 44, 38, 40, 37, 15, 41, 44, 44, 41, 54, 38, 168, 154, 153, 154, 133, 140, 150, 82, 68, 153, 176, 169, 78, 54, 41, 25, 23, 30, 39, 41, 11, 21, 23, 13, 10, 24, 15, 22, 30, 24, 38, 17, 20, 49, 93, 77, 61, 90, 108, 112, 109, 59, 30, 30, 24, 19, 32, 18, 12, 15, 19, 15, 13, 10, 12, 19, 18, 14, 11, 12, 18, 23, 28, 29, 29, 32, 31, 31, 36, 39, 40, 40, 40, 40, 41, 42, 38, 34, 29, 25, 26, 29, 33, 34, 33, 32, 31, 31, 32, 32, 35, 34, 37, 39, 37, 38, 38, 33, 35, 36, 38, 39, 40, 41, 42, 42, 41, 41, 40, 40, 46, 46, 44, 42, 41, 41, 41, 44, 43, 40, 39, 39, 40, 42, 44, 40, 36, 34, 36, 39, 41, 41, 41, 40, 38, 39, 41, 42, 39, 39, 37, 37, 39, 43, 44, 45, 43, 36, 28, 21, 17, 20, 25, 27, 15, 23, 28, 19, 24, 25, 28, 30, 27, 26, 29, 36, 36, 31, 23, 24, 28, 37, 37, 29, 32, 56, 108, 68, 48, 42, 48, 40, 31, 47, 47, 37, 27, 32, 52, 47, 48, 39, 34, 45, 49, 25, 27, 29, 42, 38, 38, 38, 27, 30, 39, 37, 38, 37, 34, 34, 39, 46, 50, 53, 56, 58, 53, 50, 50, 56, 61, 61, 56, 53, 53, 52, 52, 52, 53, 54, 54, 53, 51, 50, 50, 50, 49, 46, 48, 48, 50, 51, 48, 47, 52, 48, 35, 37, 43, 37, 31, 63, 28, 22, 22, 42, 58, 172, 177, 158, 147, 164, 119, 88, 105, 70, 115, 126, 157, 134, 156, 128, 57, 19, 17, 28, 27, 21, 12, 17, 24, 8, 34, 22, 20, 32, 25, 40, 13, 23, 54, 86, 61, 139, 81, 69, 38, 90, 103, 104, 34, 28, 38, 11, 23, 14, 14, 15, 13, 7, 8, 12, 11, 14, 19, 23, 26, 28, 32, 31, 29, 31, 25, 26, 30, 35, 38, 38, 39, 40, 40, 41, 39, 35, 29, 25, 26, 30, 33, 34, 31, 29, 28, 28, 30, 31, 31, 31, 36, 39, 38, 38, 41, 39, 34, 30, 28, 30, 33, 35, 36, 36, 38, 39, 40, 41, 45, 46, 44, 43, 42, 42, 42, 36, 36, 36, 37, 38, 40, 41, 42, 39, 34, 32, 34, 36, 39, 44, 43, 42, 39, 39, 41, 42, 38, 37, 36, 37, 41, 45, 45, 48, 47, 34, 25, 24, 20, 16, 24, 23, 12, 20, 27, 16, 25, 27, 29, 30, 29, 29, 31, 38, 40, 33, 21, 19, 28, 38, 31, 31, 33, 46, 78, 41, 37, 49, 51, 36, 24, 44, 40, 32, 32, 37, 45, 35, 49, 37, 23, 36, 44, 24, 34, 22, 33, 33, 35, 35, 30, 35, 39, 33, 33, 33, 29, 32, 32, 36, 45, 51, 54, 56, 55, 50, 49, 53, 56, 54, 48, 55, 54, 53, 53, 53, 54, 54, 56, 55, 53, 52, 52, 52, 50, 46, 46, 44, 45, 48, 46, 44, 46, 44, 32, 34, 41, 36, 29, 39, 35, 24, 41, 44, 160, 143, 178, 149, 155, 133, 125, 127, 76, 94, 105, 124, 130, 90, 132, 118, 117, 72, 42, 19, 17, 30, 25, 19, 26, 14, 39, 23, 16, 14, 35, 23, 27, 35, 74, 71, 79, 87, 53, 76, 72, 105, 56, 84, 28, 50, 89, 41, 57, 22, 16, 15, 18, 16, 15, 15, 14, 20, 27, 31, 33, 33, 38, 37, 37, 41, 30, 33, 38, 39, 41, 41, 42, 43, 43, 43, 40, 36, 30, 26, 26, 29, 32, 32, 29, 26, 25, 25, 27, 29, 28, 28, 34, 39, 37, 37, 41, 44, 41, 37, 35, 34, 36, 33, 30, 31, 33, 35, 36, 36, 36, 35, 34, 34, 34, 35, 35, 33, 35, 39, 42, 43, 43, 42, 41, 39, 36, 35, 35, 37, 40, 47, 46, 44, 40, 39, 40, 41, 39, 37, 36, 38, 42, 46, 45, 48, 48, 33, 25, 27, 23, 16, 25, 22, 14, 21, 30, 20, 28, 30, 31, 30, 29, 31, 33, 39, 39, 33, 23, 19, 31, 36, 27, 39, 41, 43, 62, 41, 47, 57, 53, 34, 30, 32, 33, 41, 40, 33, 40, 44, 57, 57, 45, 39, 46, 40, 49, 26, 34, 33, 31, 30, 31, 37, 38, 31, 32, 33, 29, 31, 26, 26, 37, 45, 48, 53, 55, 52, 50, 52, 53, 51, 47, 55, 53, 52, 52, 53, 53, 53, 55, 52, 51, 51, 51, 51, 49, 46, 45, 42, 42, 45, 43, 43, 38, 34, 36, 35, 33, 35, 30, 31, 21, 39, 19, 49, 162, 163, 153, 154, 144, 124, 104, 82, 58, 49, 77, 62, 71, 77, 66, 67, 62, 42, 26, 13, 25, 35, 25, 15, 19, 19, 38, 27, 16, 9, 26, 19, 29, 44, 77, 54, 86, 51, 67, 68, 58, 72, 49, 53, 40, 59, 94, 67, 40, 25, 14, 12, 17, 18, 18, 19, 19, 22, 25, 30, 34, 36, 41, 38, 40, 48, 36, 42, 47, 42, 41, 42, 42, 42, 42, 43, 40, 36, 32, 28, 28, 29, 31, 30, 28, 25, 24, 25, 27, 28, 27, 28, 33, 37, 36, 36, 38, 39, 41, 44, 45, 43, 40, 38, 36, 37, 37, 38, 38, 38, 35, 34, 34, 34, 35, 35, 35, 38, 41, 45, 47, 47, 43, 41, 40, 40, 39, 38, 39, 39, 41, 45, 45, 44, 40, 38, 39, 40, 39, 36, 37, 39, 43, 45, 43, 45, 44, 33, 27, 27, 23, 15, 23, 19, 17, 23, 31, 23, 32, 35, 33, 28, 28, 29, 29, 36, 36, 32, 27, 22, 33, 39, 41, 34, 33, 53, 77, 53, 52, 59, 54, 34, 38, 28, 31, 47, 40, 28, 40, 41, 48, 58, 50, 29, 37, 44, 55, 28, 36, 33, 26, 26, 29, 35, 35, 28, 32, 33, 28, 30, 21, 18, 28, 34, 39, 49, 56, 54, 52, 52, 53, 53, 52, 57, 54, 52, 53, 54, 53, 52, 52, 49, 47, 48, 49, 48, 46, 46, 45, 42, 42, 43, 39, 39, 32, 29, 37, 35, 28, 30, 30, 29, 26, 26, 38, 113, 162, 160, 145, 157, 130, 114, 77, 66, 42, 37, 45, 40, 44, 36, 56, 38, 34, 47, 32, 7, 31, 36, 20, 11, 12, 25, 34, 31, 24, 17, 11, 25, 22, 46, 67, 80, 60, 61, 52, 66, 52, 70, 55, 55, 29, 51, 81, 56, 52, 28, 16, 11, 14, 16, 17, 21, 22, 22, 23, 27, 33, 38, 42, 37, 41, 52, 39, 46, 51, 43, 41, 41, 41, 41, 41, 41, 38, 36, 33, 30, 29, 29, 30, 29, 28, 26, 25, 26, 28, 29, 28, 27, 32, 35, 33, 34, 35, 33, 37, 41, 43, 42, 40, 40, 41, 41, 42, 42, 42, 42, 40, 40, 40, 40, 40, 40, 39, 42, 44, 46, 47, 45, 41, 39, 38, 39, 40, 41, 41, 40, 40, 40, 42, 42, 40, 37, 37, 39, 40, 37, 37, 41, 44, 44, 42, 43, 41, 34, 30, 27, 21, 14, 21, 18, 23, 27, 32, 27, 34, 38, 36, 29, 28, 28, 25, 32, 35, 35, 33, 26, 37, 43, 52, 38, 31, 50, 68, 45, 46, 58, 55, 37, 42, 34, 35, 44, 33, 26, 45, 38, 37, 49, 43, 20, 28, 38, 47, 23, 36, 32, 21, 22, 28, 33, 33, 27, 31, 31, 24, 26, 18, 14, 21, 24, 30, 46, 57, 56, 54, 52, 51, 52, 54, 57, 53, 51, 52, 54, 52, 51, 51, 48, 46, 47, 47, 45, 44, 46, 46, 44, 44, 42, 36, 33, 31, 31, 33, 33, 28, 25, 30, 31, 21, 30, 101, 159, 162, 151, 143, 135, 112, 88, 58, 48, 40, 46, 34, 62, 51, 13, 58, 37, 35, 42, 35, 6, 28, 37, 21, 16, 12, 33, 28, 33, 33, 25, 7, 29, 22, 48, 58, 94, 61, 70, 38, 69, 77, 75, 50, 56, 25, 55, 74, 38, 62, 36, 25, 17, 14, 14, 17, 22, 22, 23, 25, 29, 34, 37, 42, 37, 42, 55, 40, 48, 52, 44, 43, 42, 42, 41, 41, 41, 37, 36, 34, 32, 30, 29, 28, 28, 28, 27, 27, 28, 30, 30, 29, 28, 31, 33, 31, 32, 34, 32, 32, 32, 33, 35, 37, 38, 39, 40, 41, 42, 43, 43, 43, 43, 43, 43, 42, 41, 40, 42, 42, 42, 42, 40, 37, 35, 35, 37, 40, 42, 42, 40, 38, 34, 38, 40, 39, 37, 36, 38, 40, 38, 38, 42, 44, 43, 43, 42, 40, 37, 34, 26, 19, 14, 22, 20, 33, 34, 36, 33, 34, 40, 39, 33, 31, 29, 23, 29, 35, 40, 40, 31, 42, 47, 53, 39, 33, 54, 67, 44, 44, 56, 57, 42, 41, 41, 38, 35, 28, 30, 46, 38, 33, 39, 36, 20, 26, 30, 32, 18, 30, 31, 15, 20, 28, 32, 26, 25, 27, 26, 17, 21, 15, 13, 16, 17, 24, 41, 54, 55, 54, 50, 47, 48, 49, 53, 51, 49, 51, 53, 50, 49, 51, 46, 44, 45, 46, 44, 42, 44, 46, 46, 44, 40, 33, 29, 33, 32, 27, 30, 32, 23, 28, 32, 18, 75, 160, 162, 160, 150, 132, 102, 90, 57, 49, 27, 45, 48, 40, 75, 56, 25, 45, 39, 41, 22, 30, 14, 21, 36, 23, 20, 18, 38, 27, 34, 40, 24, 21, 23, 31, 50, 62, 73, 83, 59, 50, 65, 89, 61, 48, 43, 38, 63, 67, 31, 56, 43, 32, 23, 15, 13, 17, 24, 23, 26, 29, 32, 35, 39, 45, 39, 44, 59, 41, 48, 53, 47, 47, 47, 46, 44, 43, 43, 38, 36, 35, 32, 29, 28, 27, 28, 28, 28, 28, 29, 30, 30, 29, 28, 30, 33, 31, 33, 36, 36, 32, 28, 27, 30, 34, 35, 34, 35, 36, 37, 38, 39, 40, 41, 41, 40, 39, 37, 36, 38, 38, 37, 37, 36, 35, 34, 34, 35, 37, 40, 40, 39, 37, 33, 36, 38, 38, 37, 38, 40, 41, 39, 40, 43, 44, 42, 42, 43, 39, 36, 41, 28, 25, 25, 29, 28, 43, 45, 43, 37, 32, 34, 39, 35, 35, 30, 27, 30, 38, 45, 46, 39, 47, 47, 48, 36, 39, 67, 77, 56, 52, 58, 62, 49, 35, 34, 32, 26, 39, 37, 35, 34, 28, 31, 34, 25, 21, 26, 21, 21, 22, 35, 13, 21, 29, 28, 11, 23, 22, 24, 17, 15, 14, 14, 15, 17, 22, 28, 40, 46, 51, 51, 47, 45, 45, 46, 46, 48, 52, 53, 49, 45, 45, 41, 38, 40, 42, 41, 39, 39, 41, 42, 41, 35, 30, 32, 33, 22, 24, 32, 32, 30, 24, 28, 69, 141, 162, 168, 165, 150, 108, 90, 71, 48, 45, 41, 35, 35, 33, 34, 27, 37, 33, 22, 36, 38, 37, 29, 24, 27, 16, 13, 10, 24, 34, 33, 38, 42, 15, 41, 17, 41, 53, 77, 58, 69, 52, 73, 50, 31, 37, 78, 37, 49, 39, 41, 28, 51, 36, 30, 21, 13, 12, 18, 24, 29, 32, 33, 33, 36, 42, 49, 39, 44, 61, 42, 46, 54, 49, 48, 50, 49, 44, 42, 41, 38, 38, 36, 31, 26, 26, 29, 30, 30, 29, 29, 28, 28, 28, 27, 28, 29, 32, 34, 37, 37, 34, 37, 38, 34, 32, 34, 34, 34, 33, 31, 29, 29, 31, 34, 35, 35, 35, 35, 35, 35, 35, 36, 38, 39, 39, 37, 35, 38, 36, 35, 35, 38, 38, 39, 41, 40, 37, 35, 38, 43, 45, 42, 43, 44, 44, 43, 42, 39, 44, 40, 27, 53, 37, 45, 49, 40, 39, 48, 58, 52, 39, 29, 16, 32, 33, 43, 29, 35, 40, 42, 50, 50, 53, 52, 41, 45, 40, 51, 72, 64, 56, 61, 65, 72, 60, 37, 29, 32, 21, 46, 29, 37, 34, 27, 31, 34, 25, 20, 25, 26, 27, 22, 33, 21, 24, 28, 30, 15, 26, 21, 21, 15, 17, 19, 20, 19, 19, 20, 23, 22, 33, 47, 53, 51, 46, 42, 47, 46, 48, 51, 51, 47, 44, 45, 39, 34, 32, 32, 29, 29, 31, 28, 25, 26, 29, 33, 31, 35, 26, 32, 31, 16, 45, 20, 22, 142, 188, 161, 164, 133, 148, 94, 65, 56, 47, 44, 33, 34, 48, 48, 35, 38, 39, 47, 26, 21, 31, 30, 22, 23, 30, 22, 20, 22, 25, 42, 37, 43, 28, 17, 34, 27, 64, 73, 86, 78, 65, 51, 55, 47, 60, 50, 55, 38, 53, 36, 42, 32, 37, 32, 23, 15, 15, 20, 27, 30, 32, 34, 35, 37, 41, 46, 38, 42, 57, 39, 44, 52, 47, 47, 47, 44, 40, 37, 36, 37, 38, 36, 31, 26, 26, 28, 29, 29, 28, 28, 27, 27, 27, 28, 28, 29, 30, 31, 32, 32, 31, 33, 33, 31, 31, 31, 35, 39, 39, 36, 35, 35, 36, 39, 41, 41, 41, 41, 41, 41, 39, 40, 42, 41, 39, 34, 31, 35, 33, 33, 36, 40, 43, 42, 41, 42, 40, 38, 38, 40, 41, 41, 42, 43, 43, 42, 41, 40, 44, 52, 48, 44, 63, 59, 55, 39, 39, 42, 59, 54, 40, 27, 18, 37, 40, 49, 34, 39, 52, 53, 58, 56, 58, 58, 48, 52, 43, 49, 71, 71, 63, 61, 61, 67, 56, 27, 25, 41, 28, 54, 20, 35, 32, 28, 32, 33, 25, 19, 24, 28, 29, 20, 28, 25, 24, 26, 33, 22, 31, 21, 21, 15, 17, 20, 24, 24, 21, 20, 19, 17, 22, 29, 34, 38, 41, 43, 45, 45, 46, 48, 48, 45, 41, 38, 33, 30, 29, 29, 28, 27, 26, 27, 26, 26, 25, 24, 22, 34, 38, 34, 27, 26, 18, 79, 159, 155, 163, 157, 136, 132, 125, 72, 48, 45, 44, 44, 34, 27, 33, 30, 26, 44, 35, 35, 37, 24, 34, 23, 23, 20, 23, 24, 22, 22, 23, 40, 32, 45, 26, 24, 17, 31, 68, 73, 74, 69, 55, 34, 51, 46, 45, 32, 65, 29, 55, 38, 42, 24, 37, 33, 25, 18, 17, 23, 29, 31, 32, 33, 36, 39, 39, 42, 36, 39, 50, 36, 40, 49, 46, 46, 46, 42, 38, 35, 34, 38, 38, 36, 32, 28, 27, 28, 28, 28, 27, 27, 26, 26, 26, 29, 28, 28, 27, 28, 28, 29, 31, 31, 32, 33, 34, 34, 32, 31, 32, 31, 32, 31, 31, 32, 32, 32, 32, 32, 32, 32, 34, 36, 39, 40, 38, 34, 32, 33, 32, 33, 37, 42, 44, 43, 41, 43, 43, 41, 38, 36, 38, 40, 41, 42, 42, 41, 40, 35, 39, 35, 47, 48, 52, 56, 48, 37, 58, 59, 69, 55, 36, 29, 23, 47, 50, 59, 42, 47, 56, 55, 58, 55, 57, 59, 50, 56, 47, 46, 67, 76, 69, 60, 54, 59, 53, 36, 19, 26, 32, 69, 24, 24, 32, 29, 32, 33, 26, 20, 23, 27, 26, 21, 27, 27, 25, 25, 32, 26, 34, 20, 20, 15, 16, 18, 22, 23, 20, 18, 17, 17, 16, 17, 18, 23, 31, 37, 37, 38, 40, 42, 41, 39, 36, 32, 29, 27, 27, 27, 26, 25, 23, 26, 28, 26, 22, 18, 20, 33, 17, 13, 32, 36, 61, 144, 165, 173, 159, 152, 135, 105, 82, 49, 39, 40, 38, 40, 36, 31, 28, 20, 28, 49, 43, 27, 36, 31, 36, 15, 29, 20, 15, 20, 19, 21, 29, 28, 24, 43, 24, 25, 14, 36, 73, 77, 62, 73, 51, 43, 56, 52, 38, 42, 57, 31, 47, 38, 37, 25, 34, 32, 26, 18, 16, 23, 29, 31, 31, 33, 38, 39, 38, 39, 36, 37, 45, 34, 38, 47, 46, 46, 47, 43, 39, 37, 36, 40, 39, 38, 34, 30, 29, 29, 28, 28, 27, 27, 27, 26, 26, 29, 28, 27, 25, 26, 26, 28, 31, 30, 31, 34, 37, 36, 34, 33, 35, 38, 39, 40, 39, 38, 37, 37, 37, 37, 37, 37, 32, 32, 34, 35, 34, 32, 31, 34, 33, 34, 38, 41, 43, 42, 41, 43, 44, 41, 38, 36, 37, 40, 41, 42, 42, 41, 40, 36, 43, 32, 43, 55, 49, 53, 56, 50, 61, 51, 53, 53, 56, 30, 25, 50, 53, 60, 44, 50, 53, 52, 54, 51, 54, 56, 47, 55, 49, 45, 63, 76, 71, 62, 55, 58, 55, 30, 26, 25, 25, 48, 29, 35, 32, 30, 32, 33, 27, 22, 24, 28, 24, 27, 31, 29, 28, 26, 30, 28, 34, 19, 19, 16, 16, 18, 20, 20, 18, 16, 16, 14, 14, 15, 16, 19, 22, 25, 27, 29, 31, 33, 33, 33, 32, 31, 29, 27, 24, 22, 22, 21, 21, 21, 21, 21, 22, 23, 23, 26, 20, 30, 67, 105, 122, 170, 166, 156, 137, 120, 101, 69, 44, 30, 33, 34, 30, 34, 35, 33, 32, 23, 29, 49, 51, 31, 25, 28, 33, 12, 30, 21, 13, 15, 19, 16, 38, 19, 20, 39, 22, 27, 19, 46, 75, 81, 55, 69, 43, 43, 50, 46, 35, 57, 53, 33, 38, 42, 23, 32, 31, 31, 25, 18, 15, 21, 28, 32, 31, 33, 39, 40, 37, 38, 36, 37, 41, 34, 38, 46, 46, 46, 46, 43, 41, 40, 41, 42, 41, 39, 36, 34, 31, 30, 29, 29, 28, 28, 27, 27, 27, 28, 27, 26, 25, 26, 27, 28, 29, 26, 28, 33, 35, 34, 32, 30, 31, 35, 37, 38, 36, 35, 36, 36, 36, 36, 36, 36, 33, 32, 31, 30, 29, 29, 29, 33, 33, 34, 38, 40, 41, 40, 40, 42, 42, 40, 38, 38, 40, 41, 42, 43, 43, 42, 41, 38, 43, 44, 36, 50, 62, 51, 57, 63, 61, 52, 43, 47, 58, 29, 25, 49, 50, 56, 42, 50, 53, 51, 55, 52, 53, 53, 43, 51, 53, 48, 61, 74, 71, 67, 63, 62, 60, 17, 33, 26, 20, 22, 32, 44, 33, 31, 33, 34, 30, 25, 27, 29, 23, 35, 35, 30, 30, 28, 27, 27, 33, 18, 20, 17, 20, 21, 21, 18, 15, 15, 16, 13, 14, 16, 19, 19, 18, 16, 18, 20, 23, 24, 25, 26, 27, 29, 28, 25, 21, 18, 17, 18, 18, 14, 12, 14, 20, 27, 24, 16, 37, 75, 116, 167, 156, 157, 159, 123, 102, 83, 54, 43, 29, 21, 25, 28, 26, 29, 31, 30, 35, 27, 25, 49, 50, 38, 21, 20, 27, 15, 21, 22, 17, 14, 23, 8, 45, 24, 24, 31, 18, 32, 23, 55, 73, 81, 57, 55, 45, 37, 42, 33, 37, 66, 55, 33, 37, 38, 19, 31, 29, 30, 25, 17, 12, 18, 26, 31, 31, 33, 38, 39, 37, 37, 38, 39, 40, 36, 39, 46, 45, 44, 45, 43, 41, 42, 44, 44, 42, 41, 38, 36, 33, 30, 30, 30, 29, 29, 28, 28, 28, 27, 27, 26, 26, 27, 28, 28, 27, 24, 25, 29, 32, 32, 31, 29, 28, 30, 33, 32, 29, 31, 32, 32, 32, 32, 32, 32, 35, 32, 29, 27, 28, 30, 31, 30, 31, 33, 37, 41, 41, 40, 39, 40, 40, 38, 38, 41, 43, 42, 43, 44, 44, 43, 42, 39, 38, 53, 28, 43, 74, 51, 65, 78, 58, 54, 41, 43, 50, 29, 25, 48, 47, 52, 40, 52, 56, 56, 59, 55, 54, 53, 41, 49, 58, 55, 63, 72, 70, 71, 70, 65, 65, 18, 22, 15, 27, 30, 32, 22, 34, 33, 34, 34, 34, 31, 30, 30, 25, 40, 35, 30, 29, 27, 25, 25, 31, 17, 21, 18, 24, 25, 23, 18, 14, 14, 15, 14, 13, 13, 15, 18, 19, 17, 13, 16, 18, 18, 18, 20, 21, 22, 23, 22, 20, 18, 18, 18, 15, 14, 14, 15, 19, 22, 16, 16, 53, 120, 150, 158, 155, 136, 106, 108, 83, 68, 38, 29, 34, 21, 20, 25, 28, 30, 27, 27, 28, 24, 21, 55, 40, 41, 36, 21, 26, 28, 13, 10, 22, 25, 15, 28, 3, 48, 40, 38, 23, 15, 27, 24, 57, 72, 75, 63, 46, 63, 40, 50, 29, 44, 69, 59, 32, 43, 20, 35, 22, 28, 30, 26, 17, 11, 16, 25, 31, 32, 34, 37, 39, 39, 38, 39, 40, 39, 38, 40, 46, 44, 43, 43, 42, 41, 42, 44, 45, 43, 40, 39, 38, 34, 30, 30, 30, 29, 29, 29, 28, 28, 27, 26, 26, 26, 28, 29, 29, 27, 26, 26, 28, 31, 33, 37, 38, 35, 35, 37, 35, 31, 33, 34, 34, 34, 34, 34, 34, 30, 28, 27, 28, 31, 35, 39, 27, 27, 31, 37, 41, 42, 41, 39, 39, 38, 37, 39, 43, 44, 42, 43, 44, 44, 44, 42, 39, 37, 46, 26, 50, 69, 56, 92, 97, 53, 46, 37, 46, 53, 31, 28, 51, 48, 52, 43, 58, 61, 60, 62, 57, 56, 55, 42, 50, 62, 62, 68, 72, 69, 71, 66, 61, 67, 8, 18, 24, 31, 27, 24, 20, 37, 35, 34, 35, 37, 36, 32, 31, 32, 44, 31, 31, 27, 25, 25, 25, 28, 16, 21, 18, 23, 25, 24, 19, 15, 14, 16, 17, 12, 9, 11, 16, 20, 23, 13, 17, 17, 16, 15, 16, 17, 16, 19, 22, 21, 21, 23, 22, 18, 20, 23, 23, 20, 19, 13, 10, 56, 151, 189, 165, 161, 150, 141, 104, 83, 70, 41, 39, 11, 37, 24, 20, 24, 28, 30, 26, 31, 26, 24, 28, 61, 38, 45, 60, 37, 29, 47, 13, 28, 31, 19, 21, 7, 50, 57, 56, 16, 22, 5, 37, 48, 82, 69, 56, 41, 63, 40, 53, 29, 40, 59, 78, 23, 38, 19, 31, 25, 29, 32, 29, 19, 12, 17, 24, 30, 32, 34, 35, 37, 41, 39, 39, 41, 38, 40, 40, 44, 44, 44, 44, 41, 40, 42, 44, 44, 42, 39, 39, 37, 33, 28, 29, 29, 28, 28, 28, 27, 27, 27, 26, 26, 26, 27, 28, 29, 29, 29, 28, 28, 30, 34, 35, 31, 26, 26, 29, 28, 25, 25, 25, 25, 25, 25, 25, 25, 24, 25, 27, 30, 34, 37, 39, 26, 27, 31, 35, 39, 40, 39, 39, 39, 38, 38, 39, 43, 43, 41, 43, 43, 43, 43, 41, 42, 44, 38, 41, 64, 61, 67, 88, 91, 70, 66, 51, 44, 39, 28, 28, 53, 50, 54, 45, 62, 62, 60, 62, 58, 59, 61, 50, 54, 62, 65, 74, 74, 70, 70, 61, 59, 73, 24, 19, 21, 18, 24, 24, 35, 37, 36, 34, 35, 39, 39, 35, 36, 43, 49, 30, 37, 29, 25, 26, 24, 26, 15, 21, 17, 18, 19, 20, 18, 15, 15, 16, 12, 13, 18, 24, 26, 21, 15, 17, 19, 19, 16, 13, 14, 17, 22, 24, 25, 21, 19, 20, 23, 23, 20, 19, 21, 28, 35, 82, 154, 161, 155, 169, 133, 122, 113, 73, 65, 40, 32, 38, 30, 22, 20, 20, 21, 21, 22, 23, 15, 22, 28, 27, 37, 32, 46, 66, 48, 29, 59, 28, 38, 34, 20, 8, 18, 51, 62, 67, 20, 17, 20, 20, 64, 94, 76, 69, 75, 67, 57, 69, 64, 67, 51, 95, 16, 23, 29, 15, 38, 32, 36, 32, 21, 14, 18, 25, 29, 32, 33, 33, 36, 42, 39, 38, 41, 37, 41, 40, 43, 47, 46, 46, 43, 41, 42, 44, 43, 40, 38, 37, 36, 31, 26, 28, 28, 28, 27, 26, 26, 26, 27, 26, 25, 25, 25, 26, 26, 26, 27, 26, 24, 26, 31, 34, 32, 27, 29, 34, 35, 33, 34, 35, 35, 35, 35, 35, 35, 30, 31, 32, 32, 29, 26, 23, 28, 29, 31, 35, 37, 36, 34, 38, 40, 40, 39, 39, 42, 42, 41, 41, 42, 42, 41, 41, 38, 29, 33, 47, 32, 59, 60, 71, 82, 78, 62, 42, 37, 46, 21, 23, 50, 49, 53, 44, 60, 64, 62, 64, 62, 68, 74, 63, 56, 60, 64, 75, 73, 67, 70, 65, 64, 81, 16, 21, 28, 30, 31, 30, 34, 35, 39, 38, 37, 32, 33, 40, 40, 45, 46, 36, 36, 35, 29, 29, 23, 24, 12, 18, 20, 13, 17, 21, 16, 15, 16, 15, 16, 14, 21, 15, 20, 21, 15, 18, 23, 17, 16, 18, 19, 16, 19, 25, 28, 26, 17, 19, 26, 22, 30, 18, 32, 17, 67, 147, 165, 161, 150, 137, 113, 100, 77, 46, 38, 28, 30, 40, 29, 24, 22, 20, 20, 21, 25, 30, 21, 15, 21, 30, 35, 35, 45, 56, 43, 36, 51, 42, 42, 31, 18, 15, 15, 48, 54, 67, 28, 20, 31, 22, 70, 99, 72, 64, 85, 96, 107, 107, 83, 97, 73, 74, 18, 28, 36, 11, 41, 28, 32, 31, 23, 15, 14, 19, 29, 34, 38, 39, 39, 42, 37, 35, 41, 41, 40, 39, 40, 44, 47, 48, 48, 47, 45, 44, 42, 44, 44, 40, 36, 31, 25, 28, 28, 27, 25, 24, 25, 26, 25, 24, 24, 24, 25, 26, 26, 25, 26, 28, 29, 31, 34, 35, 34, 31, 30, 31, 31, 31, 30, 30, 31, 32, 33, 33, 33, 30, 29, 30, 30, 30, 28, 25, 31, 34, 37, 38, 38, 37, 37, 38, 36, 39, 40, 38, 40, 42, 40, 41, 42, 42, 42, 42, 40, 30, 28, 41, 49, 66, 57, 58, 60, 60, 44, 39, 40, 42, 21, 27, 49, 53, 53, 56, 66, 62, 67, 62, 61, 68, 72, 59, 53, 57, 62, 79, 75, 77, 88, 86, 74, 71, 16, 21, 25, 25, 26, 32, 37, 37, 39, 37, 41, 37, 37, 43, 40, 44, 44, 38, 33, 34, 30, 30, 24, 27, 18, 21, 22, 13, 18, 20, 15, 15, 19, 19, 17, 14, 23, 12, 18, 23, 18, 18, 24, 17, 15, 17, 19, 14, 21, 19, 20, 22, 31, 29, 19, 25, 29, 28, 21, 57, 125, 168, 158, 154, 140, 109, 91, 77, 55, 33, 25, 23, 27, 37, 23, 22, 24, 25, 25, 25, 25, 26, 25, 17, 21, 31, 33, 35, 45, 53, 42, 45, 52, 48, 44, 35, 22, 17, 11, 54, 63, 67, 30, 22, 28, 38, 86, 89, 77, 68, 80, 101, 119, 106, 94, 91, 80, 72, 26, 36, 41, 16, 34, 29, 34, 35, 28, 19, 16, 19, 29, 33, 38, 40, 41, 42, 41, 40, 43, 43, 42, 41, 40, 40, 42, 45, 47, 47, 44, 42, 41, 46, 46, 41, 36, 31, 24, 28, 29, 28, 25, 24, 26, 28, 26, 25, 24, 24, 25, 26, 26, 24, 25, 27, 29, 30, 31, 33, 34, 32, 31, 30, 29, 29, 29, 29, 30, 30, 31, 31, 30, 29, 28, 28, 30, 31, 29, 27, 30, 34, 37, 38, 37, 37, 37, 35, 32, 36, 39, 37, 40, 43, 40, 42, 42, 43, 43, 43, 40, 32, 35, 45, 54, 61, 55, 53, 51, 55, 42, 41, 38, 35, 22, 28, 48, 56, 54, 62, 66, 60, 68, 63, 62, 66, 66, 55, 56, 62, 63, 81, 76, 84, 98, 111, 86, 64, 16, 21, 23, 21, 22, 31, 39, 41, 37, 34, 46, 48, 44, 46, 39, 44, 44, 39, 34, 34, 32, 30, 26, 35, 29, 27, 23, 16, 19, 19, 14, 16, 21, 22, 14, 13, 24, 13, 18, 22, 19, 20, 26, 18, 15, 14, 16, 13, 20, 23, 21, 26, 39, 30, 17, 28, 27, 25, 48, 119, 158, 159, 141, 134, 117, 84, 66, 54, 41, 27, 22, 20, 22, 30, 19, 22, 24, 26, 26, 24, 22, 21, 24, 20, 24, 28, 26, 30, 43, 52, 44, 50, 56, 47, 44, 39, 25, 15, 9, 60, 73, 64, 25, 18, 27, 55, 88, 79, 76, 75, 75, 93, 101, 93, 88, 78, 79, 83, 29, 35, 43, 30, 33, 33, 39, 40, 32, 22, 20, 23, 27, 31, 35, 37, 40, 43, 46, 45, 42, 40, 42, 42, 40, 36, 37, 40, 43, 44, 43, 41, 41, 46, 46, 41, 37, 31, 24, 28, 29, 28, 26, 25, 27, 29, 28, 28, 26, 25, 25, 26, 25, 25, 25, 26, 26, 26, 27, 31, 34, 33, 32, 32, 32, 32, 32, 32, 32, 32, 31, 30, 30, 29, 28, 28, 30, 31, 29, 27, 28, 32, 35, 37, 36, 37, 37, 34, 32, 36, 39, 38, 41, 43, 40, 41, 42, 43, 42, 42, 38, 33, 43, 53, 51, 53, 53, 55, 50, 55, 43, 37, 32, 33, 23, 27, 47, 56, 55, 61, 63, 60, 66, 65, 66, 64, 58, 50, 57, 65, 61, 82, 77, 89, 99, 130, 99, 65, 11, 23, 32, 32, 28, 29, 34, 46, 38, 35, 49, 53, 47, 46, 38, 44, 45, 41, 37, 37, 37, 33, 32, 45, 39, 32, 24, 20, 21, 18, 14, 16, 21, 23, 12, 12, 26, 15, 16, 19, 18, 22, 29, 22, 16, 14, 16, 14, 20, 32, 31, 35, 31, 23, 23, 30, 46, 49, 127, 156, 152, 142, 117, 107, 89, 57, 41, 31, 29, 24, 20, 18, 19, 25, 17, 25, 23, 20, 19, 21, 23, 25, 20, 21, 25, 24, 18, 24, 38, 46, 40, 51, 55, 40, 38, 36, 24, 16, 8, 53, 69, 54, 17, 13, 41, 66, 72, 85, 67, 78, 84, 83, 82, 90, 71, 84, 82, 90, 23, 27, 40, 47, 41, 33, 40, 41, 33, 23, 20, 23, 26, 30, 33, 35, 39, 44, 47, 43, 37, 36, 40, 40, 39, 35, 34, 38, 42, 43, 43, 42, 42, 46, 45, 41, 37, 32, 24, 26, 27, 27, 25, 24, 26, 29, 31, 30, 28, 27, 27, 27, 27, 27, 27, 27, 26, 26, 25, 30, 35, 34, 34, 34, 34, 35, 34, 34, 34, 33, 32, 31, 30, 30, 29, 28, 30, 31, 29, 27, 27, 31, 35, 36, 37, 39, 40, 39, 38, 40, 42, 42, 44, 44, 40, 41, 42, 43, 42, 42, 39, 33, 42, 56, 53, 50, 50, 58, 49, 49, 36, 29, 27, 37, 26, 26, 43, 53, 55, 60, 59, 59, 62, 66, 70, 60, 51, 47, 53, 61, 54, 81, 76, 93, 95, 134, 111, 72, 8, 25, 39, 40, 33, 28, 31, 47, 43, 41, 50, 49, 43, 43, 36, 41, 44, 43, 40, 39, 42, 40, 41, 52, 42, 32, 25, 21, 20, 17, 14, 16, 18, 20, 12, 13, 28, 17, 16, 17, 17, 23, 30, 25, 20, 16, 19, 24, 32, 15, 21, 13, 23, 36, 34, 51, 103, 180, 179, 151, 154, 117, 107, 91, 70, 42, 26, 13, 22, 25, 21, 16, 17, 22, 20, 25, 21, 18, 18, 22, 27, 29, 19, 21, 24, 22, 17, 22, 32, 34, 31, 44, 46, 29, 28, 27, 21, 24, 14, 41, 56, 42, 16, 24, 63, 79, 75, 108, 75, 80, 109, 62, 82, 82, 72, 94, 86, 90, 18, 24, 34, 51, 43, 30, 38, 39, 30, 20, 17, 19, 24, 29, 34, 38, 41, 45, 44, 38, 34, 37, 39, 39, 40, 38, 37, 40, 43, 44, 45, 44, 42, 45, 44, 41, 38, 33, 24, 23, 25, 26, 24, 23, 25, 27, 31, 30, 29, 28, 29, 29, 30, 31, 31, 30, 29, 29, 28, 30, 32, 32, 32, 33, 34, 35, 35, 35, 34, 33, 33, 33, 33, 31, 30, 29, 30, 31, 29, 27, 28, 32, 36, 37, 39, 41, 43, 45, 44, 44, 43, 44, 44, 43, 40, 41, 42, 42, 42, 41, 43, 32, 32, 51, 57, 55, 46, 56, 47, 47, 38, 30, 28, 42, 30, 25, 38, 48, 51, 57, 57, 59, 58, 65, 71, 58, 47, 48, 52, 56, 45, 75, 74, 90, 86, 120, 120, 79, 18, 25, 28, 26, 24, 29, 36, 43, 49, 51, 52, 44, 41, 45, 38, 41, 43, 42, 39, 37, 44, 46, 52, 53, 39, 31, 26, 20, 17, 17, 18, 19, 21, 24, 17, 17, 33, 22, 18, 18, 18, 20, 28, 25, 23, 19, 24, 26, 18, 18, 24, 38, 25, 64, 139, 177, 156, 171, 156, 150, 121, 88, 74, 59, 47, 32, 25, 13, 24, 30, 23, 14, 16, 20, 23, 20, 21, 26, 30, 31, 27, 22, 23, 23, 25, 26, 25, 27, 30, 26, 24, 36, 37, 20, 20, 23, 24, 33, 23, 39, 54, 40, 12, 20, 41, 70, 85, 89, 74, 90, 77, 75, 86, 72, 82, 93, 86, 82, 25, 37, 33, 43, 35, 31, 36, 38, 31, 21, 16, 16, 23, 30, 37, 41, 43, 44, 43, 41, 43, 47, 45, 41, 43, 43, 42, 44, 45, 46, 45, 44, 42, 44, 43, 40, 39, 33, 24, 22, 24, 26, 25, 25, 26, 27, 30, 30, 30, 30, 31, 32, 32, 32, 33, 33, 33, 33, 32, 30, 27, 27, 27, 28, 30, 31, 33, 34, 33, 33, 34, 35, 36, 32, 31, 30, 31, 31, 29, 27, 27, 31, 34, 37, 39, 41, 44, 42, 42, 40, 38, 39, 40, 40, 40, 41, 42, 42, 41, 40, 44, 32, 27, 44, 55, 55, 43, 45, 41, 53, 52, 45, 34, 39, 30, 23, 31, 40, 44, 53, 53, 57, 54, 59, 67, 56, 49, 53, 56, 52, 40, 70, 70, 82, 81, 108, 124, 81, 24, 26, 25, 24, 24, 31, 37, 39, 51, 55, 55, 44, 42, 51, 46, 47, 47, 45, 42, 39, 44, 47, 57, 50, 36, 34, 28, 18, 16, 20, 23, 23, 26, 33, 19, 14, 30, 21, 17, 16, 17, 18, 23, 23, 24, 22, 28, 31, 20, 18, 21, 47, 115, 161, 161, 159, 162, 149, 123, 126, 96, 65, 44, 34, 31, 27, 26, 17, 28, 35, 24, 15, 17, 18, 23, 22, 21, 22, 25, 27, 23, 17, 24, 22, 22, 26, 28, 28, 27, 25, 24, 32, 32, 20, 20, 23, 24, 28, 26, 42, 57, 39, 24, 27, 51, 79, 88, 90, 75, 81, 65, 80, 81, 77, 71, 89, 83, 67, 23, 41, 37, 46, 49, 36, 39, 39, 35, 27, 18, 15, 22, 30, 39, 43, 44, 43, 44, 44, 48, 54, 48, 39, 41, 44, 44, 45, 45, 44, 43, 42, 42, 44, 43, 41, 40, 34, 24, 23, 26, 28, 28, 28, 29, 30, 30, 30, 30, 31, 32, 33, 33, 30, 30, 31, 32, 32, 33, 31, 30, 29, 29, 30, 32, 33, 34, 34, 33, 33, 34, 36, 38, 33, 31, 31, 31, 31, 29, 27, 26, 29, 32, 34, 36, 39, 41, 39, 39, 38, 36, 40, 40, 39, 40, 41, 41, 41, 40, 39, 41, 34, 34, 43, 47, 50, 42, 42, 37, 47, 47, 44, 36, 38, 28, 20, 27, 34, 38, 48, 49, 53, 49, 52, 59, 51, 50, 54, 51, 44, 40, 66, 71, 87, 89, 107, 120, 86, 27, 29, 32, 33, 33, 33, 34, 38, 47, 51, 54, 47, 43, 52, 52, 51, 49, 48, 46, 44, 45, 44, 56, 44, 36, 41, 32, 21, 19, 24, 26, 24, 28, 40, 21, 14, 29, 22, 21, 19, 20, 20, 22, 23, 28, 28, 33, 34, 19, 36, 87, 133, 144, 157, 169, 152, 137, 115, 100, 83, 69, 48, 47, 41, 36, 29, 26, 17, 31, 41, 27, 18, 21, 18, 22, 26, 20, 16, 18, 21, 21, 18, 22, 20, 21, 24, 26, 25, 24, 27, 26, 28, 27, 23, 22, 23, 20, 23, 25, 39, 53, 33, 25, 28, 66, 76, 76, 92, 66, 62, 96, 60, 77, 76, 67, 81, 80, 55, 19, 37, 42, 50, 61, 39, 39, 39, 37, 31, 20, 14, 22, 30, 38, 42, 42, 42, 44, 44, 46, 53, 48, 37, 38, 43, 44, 44, 44, 43, 42, 41, 42, 43, 42, 41, 41, 34, 23, 23, 27, 29, 30, 30, 31, 32, 31, 30, 30, 30, 31, 32, 32, 29, 29, 30, 30, 30, 31, 32, 33, 33, 32, 33, 34, 35, 35, 35, 33, 32, 33, 35, 37, 33, 32, 31, 31, 31, 29, 27, 27, 29, 31, 33, 35, 38, 40, 39, 41, 38, 38, 42, 42, 40, 41, 41, 41, 41, 40, 39, 36, 33, 40, 43, 44, 50, 42, 44, 39, 41, 34, 38, 36, 36, 25, 19, 27, 33, 36, 45, 46, 48, 46, 47, 52, 49, 50, 51, 43, 38, 43, 61, 70, 90, 90, 101, 99, 91, 29, 31, 36, 40, 40, 35, 33, 40, 42, 44, 53, 49, 41, 47, 49, 47, 46, 47, 48, 48, 44, 38, 53, 39, 38, 49, 36, 25, 24, 27, 27, 21, 26, 42, 26, 16, 30, 27, 28, 27, 28, 22, 23, 24, 32, 33, 38, 44, 68, 104, 146, 168, 153, 141, 142, 125, 107, 81, 69, 64, 52, 39, 43, 44, 39, 29, 26, 21, 35, 46, 32, 23, 26, 18, 21, 24, 19, 18, 21, 25, 23, 19, 22, 22, 23, 23, 25, 24, 23, 27, 27, 24, 23, 25, 23, 21, 18, 21, 27, 32, 43, 27, 22, 37, 81, 74, 84, 99, 72, 67, 103, 59, 64, 69, 75, 73, 74, 48, 22, 36, 46, 47, 56, 39, 36, 36, 37, 32, 18, 12, 23, 29, 35, 39, 40, 41, 44, 42, 41, 50, 48, 39, 38, 42, 43, 43, 43, 43, 42, 42, 42, 43, 41, 40, 41, 35, 23, 22, 26, 29, 30, 30, 31, 32, 33, 32, 31, 30, 30, 31, 30, 28, 28, 28, 28, 28, 28, 31, 33, 32, 32, 32, 33, 34, 36, 35, 33, 32, 32, 34, 36, 33, 32, 31, 32, 31, 29, 27, 28, 30, 32, 33, 35, 38, 41, 42, 44, 40, 38, 42, 42, 39, 41, 41, 41, 41, 39, 38, 32, 31, 40, 42, 48, 56, 42, 46, 43, 43, 32, 38, 37, 31, 22, 19, 30, 36, 36, 43, 43, 44, 44, 43, 48, 48, 49, 48, 42, 37, 48, 55, 63, 85, 79, 87, 69, 90, 32, 34, 38, 40, 40, 38, 36, 40, 39, 40, 49, 48, 42, 43, 43, 42, 42, 41, 46, 48, 42, 37, 51, 37, 41, 52, 36, 27, 30, 32, 24, 19, 26, 43, 32, 22, 31, 32, 36, 35, 34, 24, 27, 27, 33, 39, 56, 96, 145, 161, 156, 136, 146, 128, 94, 79, 74, 51, 38, 57, 42, 39, 33, 38, 38, 27, 25, 26, 34, 46, 31, 23, 29, 21, 21, 22, 24, 29, 42, 42, 31, 21, 27, 29, 27, 28, 28, 28, 23, 26, 25, 22, 21, 25, 23, 20, 19, 25, 31, 31, 32, 23, 19, 47, 79, 73, 96, 94, 83, 82, 80, 67, 50, 60, 72, 64, 67, 46, 27, 37, 45, 42, 43, 40, 35, 32, 32, 29, 16, 13, 10, 22, 28, 34, 36, 39, 41, 44, 42, 39, 45, 51, 44, 40, 43, 44, 44, 43, 43, 43, 43, 44, 44, 42, 41, 41, 34, 22, 21, 25, 28, 29, 29, 29, 31, 34, 33, 32, 31, 30, 30, 30, 30, 29, 29, 28, 28, 28, 30, 31, 30, 30, 30, 31, 33, 37, 37, 35, 33, 32, 33, 34, 33, 32, 30, 31, 30, 29, 28, 29, 31, 34, 35, 34, 39, 41, 44, 45, 43, 40, 40, 38, 38, 42, 42, 41, 41, 40, 38, 33, 30, 38, 44, 54, 59, 42, 43, 43, 45, 41, 44, 36, 27, 17, 20, 31, 37, 33, 45, 40, 39, 43, 40, 44, 49, 44, 45, 44, 38, 48, 49, 55, 74, 70, 72, 50, 79, 32, 39, 42, 38, 37, 41, 42, 35, 43, 45, 43, 45, 47, 46, 43, 44, 42, 35, 45, 47, 43, 42, 55, 42, 45, 47, 33, 26, 40, 39, 24, 25, 34, 49, 36, 30, 30, 36, 40, 39, 37, 21, 35, 41, 46, 64, 104, 191, 173, 132, 129, 110, 100, 75, 60, 48, 35, 27, 29, 31, 33, 41, 42, 40, 43, 26, 21, 23, 23, 38, 23, 16, 26, 28, 22, 31, 43, 54, 82, 75, 50, 25, 37, 37, 31, 35, 37, 35, 23, 24, 22, 24, 25, 22, 23, 23, 25, 30, 34, 40, 24, 23, 19, 42, 56, 62, 77, 63, 72, 71, 66, 52, 46, 47, 45, 52, 60, 41, 23, 33, 38, 46, 40, 43, 37, 28, 25, 25, 17, 11, 20, 27, 33, 34, 37, 41, 42, 43, 41, 40, 52, 50, 41, 43, 45, 45, 44, 44, 44, 44, 46, 48, 45, 43, 40, 32, 20, 21, 23, 26, 27, 27, 28, 29, 33, 33, 33, 33, 31, 30, 30, 33, 32, 31, 30, 30, 30, 30, 31, 29, 29, 30, 34, 36, 39, 38, 37, 35, 34, 33, 33, 30, 29, 29, 28, 28, 29, 29, 28, 32, 36, 36, 30, 39, 40, 43, 43, 47, 46, 37, 35, 40, 43, 43, 40, 40, 42, 39, 37, 34, 39, 53, 58, 52, 41, 35, 38, 37, 47, 46, 30, 28, 13, 23, 28, 36, 24, 53, 35, 36, 43, 36, 42, 52, 35, 42, 43, 34, 37, 48, 53, 63, 71, 65, 54, 62, 38, 37, 42, 42, 37, 42, 50, 41, 46, 45, 41, 43, 47, 46, 44, 47, 46, 39, 45, 47, 41, 38, 47, 36, 40, 45, 36, 42, 47, 37, 30, 30, 30, 42, 30, 45, 52, 40, 28, 35, 49, 15, 51, 100, 146, 171, 160, 165, 121, 95, 101, 86, 73, 41, 33, 43, 38, 33, 33, 37, 45, 47, 41, 41, 44, 26, 22, 26, 32, 32, 31, 18, 18, 37, 16, 51, 95, 118, 135, 131, 90, 12, 34, 35, 34, 31, 40, 27, 28, 29, 26, 26, 23, 20, 23, 22, 21, 27, 32, 33, 28, 31, 25, 38, 46, 48, 57, 49, 57, 61, 58, 39, 30, 36, 43, 54, 43, 28, 15, 29, 34, 42, 37, 38, 33, 27, 26, 29, 21, 15, 22, 28, 32, 31, 33, 38, 41, 45, 42, 39, 51, 50, 41, 37, 37, 39, 41, 43, 44, 45, 45, 48, 48, 46, 44, 34, 20, 20, 23, 25, 26, 27, 28, 30, 30, 30, 30, 30, 30, 31, 31, 33, 31, 30, 30, 30, 30, 31, 32, 30, 29, 29, 32, 34, 35, 34, 33, 32, 31, 31, 31, 32, 31, 29, 27, 26, 27, 27, 33, 38, 42, 40, 34, 37, 38, 39, 40, 44, 42, 37, 41, 46, 46, 44, 39, 38, 40, 37, 34, 33, 37, 56, 57, 54, 44, 42, 44, 36, 37, 37, 28, 31, 21, 25, 23, 29, 27, 52, 43, 51, 30, 28, 46, 51, 28, 35, 42, 40, 39, 43, 51, 55, 57, 58, 56, 68, 40, 33, 39, 43, 34, 37, 52, 44, 47, 44, 38, 40, 45, 42, 36, 43, 47, 38, 42, 45, 42, 40, 45, 36, 40, 48, 43, 47, 40, 27, 33, 38, 35, 45, 44, 52, 52, 43, 41, 43, 43, 52, 92, 138, 161, 163, 135, 104, 84, 67, 68, 56, 49, 29, 23, 36, 39, 36, 32, 38, 50, 50, 42, 42, 44, 29, 27, 31, 31, 33, 25, 27, 32, 29, 62, 140, 131, 136, 148, 124, 87, 33, 36, 37, 41, 31, 44, 21, 30, 28, 27, 28, 26, 20, 23, 25, 23, 32, 33, 28, 34, 40, 32, 35, 41, 42, 43, 41, 44, 38, 43, 34, 29, 37, 39, 42, 36, 25, 18, 34, 35, 40, 36, 34, 30, 25, 26, 30, 24, 17, 23, 27, 30, 30, 32, 35, 41, 48, 43, 39, 50, 49, 42, 35, 34, 38, 41, 44, 44, 44, 42, 46, 48, 47, 44, 33, 18, 17, 20, 23, 24, 25, 26, 28, 27, 27, 27, 27, 29, 31, 32, 32, 30, 29, 29, 29, 30, 31, 32, 30, 28, 28, 29, 31, 33, 34, 33, 33, 33, 33, 33, 36, 34, 31, 29, 28, 28, 28, 31, 37, 40, 37, 35, 33, 37, 41, 42, 44, 42, 39, 45, 50, 46, 43, 38, 36, 39, 36, 33, 36, 39, 61, 57, 59, 53, 39, 41, 35, 31, 35, 36, 41, 29, 32, 29, 30, 35, 46, 45, 53, 25, 27, 42, 50, 36, 36, 35, 42, 40, 43, 56, 57, 50, 50, 58, 71, 39, 34, 39, 42, 35, 37, 47, 42, 45, 42, 36, 37, 42, 38, 30, 40, 47, 38, 41, 45, 44, 44, 46, 39, 42, 48, 45, 43, 35, 23, 31, 42, 41, 48, 55, 52, 43, 44, 54, 51, 34, 54, 79, 102, 98, 92, 88, 61, 65, 54, 52, 44, 43, 33, 28, 36, 41, 38, 33, 39, 50, 53, 44, 41, 44, 34, 35, 35, 28, 38, 25, 32, 40, 28, 100, 146, 137, 133, 131, 121, 100, 28, 42, 43, 46, 38, 45, 24, 27, 26, 27, 30, 29, 23, 26, 30, 30, 40, 39, 26, 37, 44, 36, 32, 38, 41, 36, 37, 36, 24, 36, 35, 31, 38, 36, 33, 38, 29, 26, 42, 35, 35, 33, 34, 29, 24, 25, 30, 23, 17, 21, 27, 31, 33, 33, 33, 40, 50, 45, 39, 48, 48, 43, 39, 38, 42, 44, 45, 43, 42, 40, 43, 45, 45, 42, 31, 17, 15, 18, 21, 22, 23, 25, 27, 27, 25, 24, 25, 27, 30, 31, 30, 29, 28, 28, 28, 29, 30, 30, 29, 27, 27, 28, 29, 31, 32, 32, 33, 34, 34, 34, 35, 33, 30, 28, 27, 28, 28, 29, 34, 36, 35, 37, 33, 40, 46, 46, 46, 45, 43, 45, 47, 43, 42, 37, 37, 39, 35, 32, 38, 39, 60, 53, 61, 59, 37, 41, 39, 32, 38, 42, 47, 29, 38, 40, 37, 43, 40, 42, 50, 36, 36, 33, 45, 46, 38, 36, 44, 45, 48, 59, 60, 51, 46, 56, 68, 38, 42, 44, 43, 40, 40, 40, 39, 43, 41, 37, 37, 42, 38, 31, 41, 50, 40, 41, 46, 44, 44, 44, 41, 44, 47, 44, 40, 39, 29, 30, 42, 44, 47, 54, 52, 44, 44, 53, 50, 34, 50, 50, 57, 52, 50, 65, 44, 51, 50, 48, 47, 45, 40, 37, 41, 44, 41, 37, 44, 51, 54, 46, 39, 44, 41, 44, 38, 29, 40, 35, 31, 39, 41, 96, 133, 134, 128, 119, 119, 105, 23, 45, 48, 47, 47, 45, 35, 24, 30, 29, 31, 30, 27, 34, 38, 37, 46, 44, 28, 40, 47, 41, 32, 37, 39, 30, 35, 32, 24, 36, 33, 28, 34, 34, 34, 39, 30, 30, 44, 30, 26, 28, 33, 29, 24, 25, 30, 25, 17, 19, 27, 34, 37, 37, 33, 41, 52, 47, 39, 48, 48, 45, 43, 43, 46, 47, 46, 43, 40, 41, 43, 43, 42, 40, 30, 18, 15, 18, 21, 22, 22, 24, 26, 26, 24, 23, 23, 24, 27, 28, 27, 27, 26, 26, 27, 27, 28, 27, 26, 26, 26, 27, 27, 27, 28, 29, 31, 31, 31, 31, 30, 28, 26, 25, 25, 27, 29, 32, 36, 36, 35, 40, 37, 45, 49, 47, 47, 47, 46, 43, 41, 42, 42, 38, 38, 38, 32, 28, 34, 34, 49, 45, 56, 58, 43, 50, 45, 35, 40, 45, 48, 25, 42, 48, 42, 46, 38, 42, 53, 48, 46, 30, 41, 48, 41, 44, 47, 51, 54, 57, 58, 54, 47, 53, 61, 35, 47, 47, 43, 45, 43, 32, 36, 42, 42, 38, 39, 43, 40, 35, 43, 51, 40, 39, 44, 41, 42, 40, 44, 47, 46, 44, 40, 47, 39, 31, 41, 46, 48, 49, 53, 50, 44, 43, 43, 39, 55, 38, 40, 44, 46, 60, 42, 44, 47, 46, 52, 46, 44, 45, 45, 46, 40, 40, 47, 50, 53, 47, 38, 45, 47, 50, 40, 34, 43, 42, 31, 42, 53, 75, 137, 130, 122, 116, 109, 95, 29, 46, 49, 44, 53, 43, 47, 26, 41, 34, 30, 29, 31, 42, 46, 42, 48, 46, 34, 44, 49, 49, 40, 41, 39, 27, 36, 35, 30, 39, 32, 27, 31, 33, 39, 38, 28, 30, 43, 25, 21, 27, 33, 29, 25, 27, 33, 28, 19, 16, 26, 37, 42, 41, 35, 41, 52, 48, 41, 48, 49, 47, 45, 45, 47, 48, 47, 44, 41, 44, 46, 44, 41, 39, 31, 20, 16, 19, 22, 22, 23, 24, 25, 25, 23, 22, 21, 22, 24, 25, 25, 24, 24, 24, 25, 26, 25, 24, 24, 25, 25, 26, 26, 24, 25, 27, 28, 29, 28, 27, 26, 24, 22, 22, 24, 28, 31, 37, 39, 37, 35, 41, 39, 45, 47, 45, 45, 47, 48, 41, 37, 42, 43, 39, 38, 35, 28, 24, 30, 30, 38, 39, 50, 55, 51, 58, 48, 37, 41, 46, 51, 24, 45, 52, 42, 45, 43, 49, 60, 49, 48, 38, 43, 46, 47, 51, 47, 53, 59, 55, 57, 58, 52, 51, 55, 30, 44, 45, 39, 44, 41, 27, 35, 41, 41, 37, 39, 44, 42, 37, 40, 46, 37, 34, 38, 36, 40, 38, 47, 50, 48, 47, 39, 50, 45, 35, 42, 49, 54, 49, 51, 51, 45, 38, 36, 40, 64, 48, 46, 53, 49, 51, 40, 45, 44, 39, 50, 41, 48, 53, 46, 45, 37, 38, 47, 47, 50, 47, 39, 46, 49, 53, 40, 39, 49, 38, 41, 58, 56, 73, 142, 129, 115, 113, 99, 83, 40, 49, 48, 41, 52, 42, 52, 34, 53, 39, 31, 31, 36, 48, 50, 44, 44, 43, 40, 46, 52, 58, 52, 48, 42, 32, 40, 42, 32, 38, 36, 36, 36, 33, 41, 37, 28, 32, 44, 24, 22, 34, 34, 31, 28, 31, 37, 33, 23, 16, 26, 37, 44, 43, 37, 41, 52, 49, 42, 50, 50, 48, 45, 44, 46, 47, 46, 45, 43, 47, 49, 47, 43, 40, 32, 20, 16, 20, 22, 22, 22, 23, 24, 21, 20, 19, 19, 19, 20, 22, 22, 22, 21, 22, 23, 24, 24, 23, 23, 24, 24, 24, 24, 24, 25, 27, 28, 29, 27, 26, 25, 24, 22, 23, 26, 31, 35, 39, 38, 37, 36, 38, 38, 40, 42, 43, 43, 45, 47, 41, 38, 44, 44, 39, 36, 33, 25, 24, 30, 34, 31, 42, 47, 51, 57, 58, 45, 38, 44, 49, 59, 31, 50, 52, 42, 42, 57, 58, 65, 42, 43, 51, 55, 47, 54, 51, 43, 52, 61, 59, 61, 64, 58, 52, 52, 27, 35, 37, 37, 38, 36, 27, 34, 39, 37, 33, 35, 42, 41, 34, 33, 39, 31, 30, 35, 36, 42, 37, 49, 50, 47, 48, 37, 45, 43, 40, 44, 49, 61, 54, 44, 43, 46, 41, 35, 39, 46, 46, 41, 43, 40, 38, 41, 50, 42, 32, 48, 35, 50, 58, 46, 45, 34, 33, 41, 42, 44, 45, 42, 48, 47, 50, 40, 40, 55, 37, 53, 67, 60, 102, 95, 124, 116, 106, 109, 93, 35, 58, 52, 43, 45, 42, 49, 43, 54, 40, 35, 39, 43, 48, 50, 46, 39, 36, 43, 44, 52, 60, 57, 56, 52, 44, 47, 48, 34, 36, 40, 47, 44, 37, 47, 42, 31, 36, 49, 28, 30, 48, 40, 36, 33, 35, 41, 36, 26, 18, 25, 35, 42, 43, 39, 41, 51, 50, 44, 51, 52, 50, 46, 44, 45, 46, 46, 46, 46, 48, 50, 48, 45, 42, 32, 18, 14, 17, 19, 18, 17, 18, 18, 15, 15, 16, 17, 18, 18, 19, 20, 19, 19, 20, 21, 22, 22, 23, 23, 23, 23, 22, 21, 23, 26, 28, 30, 29, 28, 26, 25, 23, 21, 22, 26, 32, 36, 36, 35, 37, 39, 37, 38, 36, 40, 46, 45, 42, 44, 44, 42, 43, 41, 34, 33, 33, 28, 29, 32, 42, 32, 52, 47, 49, 54, 50, 40, 41, 48, 51, 63, 44, 59, 54, 45, 41, 71, 60, 64, 44, 42, 60, 68, 51, 57, 47, 43, 49, 62, 70, 67, 66, 66, 59, 53, 30, 30, 35, 39, 37, 35, 34, 33, 36, 31, 26, 29, 38, 39, 32, 29, 36, 32, 34, 41, 39, 42, 33, 44, 44, 39, 41, 38, 40, 38, 42, 42, 41, 58, 48, 38, 42, 47, 38, 35, 46, 43, 48, 39, 47, 55, 43, 42, 41, 38, 36, 58, 34, 40, 53, 53, 51, 38, 32, 39, 40, 41, 43, 45, 49, 43, 47, 39, 41, 50, 57, 51, 45, 84, 120, 105, 117, 111, 114, 101, 77, 50, 71, 59, 48, 38, 42, 43, 46, 43, 37, 41, 49, 50, 45, 46, 48, 34, 29, 43, 40, 49, 49, 48, 56, 58, 52, 47, 44, 43, 39, 37, 44, 43, 44, 67, 47, 35, 39, 52, 31, 35, 57, 47, 43, 38, 39, 42, 36, 27, 21, 25, 33, 39, 42, 39, 41, 51, 50, 45, 52, 52, 51, 49, 48, 47, 47, 47, 47, 47, 46, 49, 49, 46, 42, 29, 14, 13, 10, 12, 14, 13, 11, 11, 12, 9, 13, 10, 13, 15, 16, 17, 17, 18, 17, 18, 18, 19, 20, 22, 24, 24, 23, 21, 20, 19, 20, 23, 25, 26, 26, 24, 22, 20, 18, 16, 17, 21, 26, 31, 34, 35, 40, 46, 42, 44, 37, 43, 52, 49, 40, 40, 46, 46, 40, 36, 30, 30, 35, 35, 33, 31, 47, 31, 56, 46, 44, 52, 49, 41, 47, 51, 46, 53, 57, 69, 61, 55, 47, 80, 56, 68, 66, 53, 60, 72, 52, 53, 53, 53, 52, 63, 75, 66, 62, 72, 65, 56, 34, 30, 32, 34, 32, 32, 35, 37, 36, 34, 31, 31, 35, 34, 30, 29, 31, 31, 33, 37, 38, 40, 37, 40, 41, 40, 40, 37, 42, 41, 39, 38, 36, 48, 46, 41, 41, 40, 33, 30, 37, 42, 47, 44, 42, 40, 39, 41, 38, 34, 30, 53, 35, 41, 49, 48, 49, 37, 32, 39, 40, 40, 39, 43, 48, 44, 48, 39, 46, 49, 58, 50, 56, 86, 115, 116, 114, 99, 108, 96, 70, 55, 62, 63, 60, 48, 43, 46, 52, 47, 37, 43, 52, 45, 41, 47, 44, 38, 22, 46, 56, 58, 56, 58, 58, 50, 55, 62, 46, 44, 45, 49, 56, 59, 59, 66, 55, 41, 38, 46, 37, 61, 62, 38, 38, 41, 33, 44, 40, 26, 20, 28, 34, 35, 41, 43, 37, 52, 57, 38, 39, 53, 50, 47, 45, 44, 47, 46, 44, 46, 47, 47, 47, 46, 43, 31, 18, 16, 16, 7, 6, 12, 12, 14, 15, 12, 14, 7, 14, 18, 19, 19, 17, 19, 19, 16, 14, 15, 18, 19, 19, 20, 20, 19, 20, 19, 21, 23, 22, 19, 18, 18, 13, 12, 18, 24, 29, 35, 35, 38, 40, 39, 38, 42, 43, 46, 52, 44, 38, 46, 48, 41, 39, 40, 29, 39, 41, 40, 32, 35, 53, 57, 46, 50, 41, 60, 58, 42, 52, 63, 56, 65, 68, 59, 68, 57, 57, 89, 65, 70, 74, 73, 71, 75, 67, 55, 55, 52, 49, 65, 76, 70, 71, 73, 67, 57, 33, 29, 30, 30, 28, 29, 33, 37, 36, 34, 32, 32, 35, 34, 31, 30, 28, 29, 30, 32, 34, 35, 36, 36, 37, 37, 37, 34, 41, 40, 36, 35, 34, 43, 45, 44, 45, 42, 34, 33, 39, 40, 42, 42, 41, 39, 39, 40, 35, 32, 27, 48, 34, 39, 46, 44, 47, 36, 31, 39, 41, 38, 36, 41, 47, 42, 45, 36, 45, 47, 56, 56, 70, 91, 115, 116, 105, 96, 93, 93, 66, 78, 65, 63, 60, 49, 46, 57, 61, 51, 41, 48, 51, 40, 37, 43, 38, 39, 29, 51, 60, 55, 55, 58, 57, 47, 51, 64, 49, 45, 57, 62, 61, 68, 69, 58, 60, 66, 44, 44, 54, 65, 57, 43, 44, 46, 34, 45, 38, 25, 19, 26, 33, 34, 40, 45, 37, 50, 57, 41, 39, 51, 49, 45, 42, 43, 49, 47, 43, 44, 47, 46, 46, 46, 44, 35, 24, 16, 20, 11, 13, 10, 13, 9, 9, 17, 14, 18, 9, 16, 17, 15, 13, 12, 16, 17, 14, 13, 14, 15, 16, 17, 18, 19, 19, 18, 16, 17, 20, 19, 15, 16, 18, 12, 11, 20, 27, 33, 38, 36, 40, 42, 39, 39, 43, 47, 48, 51, 43, 38, 47, 46, 39, 37, 41, 27, 41, 45, 41, 28, 34, 52, 74, 50, 54, 38, 57, 55, 43, 53, 63, 61, 75, 74, 61, 78, 65, 65, 93, 70, 70, 86, 86, 70, 76, 79, 58, 56, 61, 56, 67, 81, 75, 74, 74, 69, 62, 28, 25, 26, 27, 25, 26, 30, 34, 33, 32, 30, 31, 34, 34, 31, 29, 27, 26, 26, 27, 29, 31, 32, 32, 33, 33, 33, 29, 36, 36, 33, 33, 32, 40, 43, 46, 49, 46, 37, 37, 45, 37, 35, 37, 42, 45, 42, 38, 33, 32, 28, 44, 30, 35, 42, 43, 46, 36, 31, 38, 41, 36, 34, 42, 47, 40, 41, 34, 44, 45, 53, 64, 79, 95, 112, 111, 93, 92, 77, 87, 68, 98, 70, 63, 64, 57, 58, 70, 67, 54, 48, 53, 50, 36, 34, 40, 36, 40, 43, 54, 57, 47, 50, 51, 53, 46, 45, 57, 54, 54, 72, 74, 65, 69, 69, 51, 62, 75, 49, 48, 66, 59, 55, 56, 58, 53, 43, 49, 35, 28, 18, 20, 32, 36, 39, 46, 39, 47, 54, 48, 43, 46, 48, 46, 44, 46, 50, 48, 43, 43, 47, 46, 45, 46, 45, 37, 29, 18, 26, 22, 20, 19, 9, 7, 12, 11, 18, 12, 19, 16, 12, 11, 11, 15, 16, 13, 14, 15, 13, 15, 17, 17, 17, 17, 18, 16, 17, 20, 18, 15, 15, 17, 11, 12, 21, 29, 35, 39, 37, 42, 44, 42, 42, 45, 49, 49, 49, 43, 40, 43, 43, 40, 38, 40, 25, 43, 51, 47, 27, 36, 52, 84, 63, 61, 43, 63, 61, 56, 60, 59, 62, 75, 81, 70, 86, 74, 71, 94, 74, 70, 93, 89, 68, 76, 85, 61, 59, 78, 69, 71, 88, 79, 73, 75, 71, 67, 24, 21, 23, 24, 22, 23, 27, 30, 29, 28, 26, 27, 30, 30, 27, 26, 24, 23, 24, 25, 27, 29, 29, 30, 31, 31, 31, 25, 32, 32, 30, 31, 30, 38, 39, 43, 48, 46, 38, 37, 45, 34, 30, 33, 42, 48, 43, 35, 33, 33, 32, 40, 29, 33, 40, 41, 44, 36, 30, 36, 40, 35, 35, 44, 47, 39, 37, 34, 44, 45, 47, 69, 80, 90, 100, 104, 84, 82, 68, 78, 77, 94, 66, 65, 78, 74, 74, 78, 65, 58, 55, 57, 50, 35, 37, 45, 40, 44, 55, 53, 55, 45, 48, 44, 46, 44, 39, 51, 61, 68, 79, 77, 66, 65, 62, 49, 59, 55, 52, 53, 66, 56, 57, 64, 69, 61, 55, 57, 37, 34, 18, 15, 31, 39, 39, 47, 42, 46, 53, 53, 45, 42, 45, 51, 50, 47, 47, 45, 43, 44, 47, 44, 43, 44, 43, 37, 33, 26, 35, 32, 30, 26, 17, 18, 13, 10, 8, 15, 13, 10, 18, 15, 14, 15, 15, 18, 17, 13, 14, 14, 13, 15, 16, 17, 17, 16, 19, 17, 18, 22, 20, 16, 17, 16, 13, 10, 12, 22, 30, 36, 41, 37, 42, 45, 44, 42, 44, 47, 49, 45, 44, 43, 40, 42, 42, 41, 42, 26, 49, 62, 58, 31, 40, 57, 89, 75, 70, 56, 78, 75, 77, 73, 61, 66, 75, 90, 76, 87, 75, 72, 93, 77, 70, 84, 84, 71, 78, 84, 62, 63, 91, 82, 75, 92, 81, 72, 75, 71, 69, 20, 18, 20, 22, 20, 21, 25, 27, 25, 23, 22, 21, 24, 23, 21, 20, 20, 22, 24, 26, 28, 29, 29, 30, 30, 30, 31, 23, 29, 28, 28, 30, 29, 36, 36, 37, 41, 42, 37, 35, 38, 33, 30, 33, 42, 46, 40, 33, 35, 36, 38, 38, 31, 35, 40, 41, 43, 36, 30, 34, 38, 36, 39, 46, 45, 37, 35, 38, 47, 45, 41, 68, 74, 77, 82, 95, 82, 72, 69, 71, 89, 71, 63, 69, 90, 85, 79, 80, 62, 62, 61, 58, 46, 34, 45, 56, 51, 49, 61, 49, 52, 46, 51, 39, 38, 40, 37, 50, 68, 74, 67, 64, 62, 55, 51, 56, 50, 30, 59, 53, 56, 63, 56, 60, 70, 64, 65, 65, 40, 40, 19, 12, 31, 42, 39, 48, 44, 46, 53, 51, 43, 40, 43, 53, 52, 43, 38, 37, 41, 47, 47, 43, 40, 41, 38, 34, 33, 35, 41, 35, 33, 32, 30, 36, 18, 12, 14, 7, 16, 14, 15, 15, 15, 18, 16, 12, 14, 15, 14, 15, 16, 17, 17, 16, 19, 17, 19, 22, 20, 16, 17, 14, 9, 11, 22, 31, 36, 41, 38, 41, 43, 43, 41, 41, 42, 47, 41, 43, 45, 39, 41, 46, 44, 43, 28, 56, 74, 71, 39, 44, 66, 81, 82, 75, 74, 83, 79, 89, 85, 73, 81, 83, 98, 75, 77, 67, 67, 86, 75, 69, 64, 74, 80, 80, 75, 59, 65, 90, 86, 77, 87, 77, 72, 76, 72, 71, 18, 16, 20, 22, 20, 21, 24, 26, 24, 21, 19, 18, 20, 19, 18, 18, 18, 20, 23, 25, 27, 27, 28, 28, 28, 29, 29, 22, 27, 27, 27, 30, 29, 35, 38, 34, 35, 39, 38, 33, 31, 33, 33, 35, 39, 39, 34, 31, 34, 36, 41, 36, 34, 35, 39, 41, 40, 33, 29, 31, 34, 36, 41, 45, 40, 34, 33, 41, 49, 43, 39, 66, 71, 70, 75, 80, 76, 70, 65, 69, 88, 67, 71, 76, 86, 76, 70, 78, 72, 67, 63, 55, 40, 32, 48, 62, 58, 56, 64, 48, 50, 45, 54, 38, 30, 36, 36, 52, 73, 58, 48, 50, 53, 50, 50, 60, 37, 44, 71, 46, 54, 68, 52, 48, 62, 63, 69, 68, 39, 40, 20, 12, 32, 43, 39, 49, 44, 48, 54, 46, 39, 40, 40, 44, 44, 37, 32, 35, 41, 47, 49, 42, 39, 40, 36, 32, 33, 38, 41, 35, 33, 33, 34, 45, 32, 26, 26, 15, 18, 12, 12, 6, 7, 11, 13, 12, 15, 17, 15, 16, 17, 17, 17, 16, 16, 13, 15, 18, 16, 13, 14, 12, 7, 13, 10, 21, 30, 35, 40, 40, 42, 43, 42, 39, 38, 39, 43, 38, 43, 46, 39, 41, 46, 41, 39, 29, 60, 78, 78, 42, 41, 79, 71, 87, 78, 89, 88, 81, 93, 90, 80, 84, 78, 100, 73, 69, 65, 67, 80, 68, 66, 61, 75, 86, 83, 71, 56, 68, 80, 84, 79, 80, 72, 73, 81, 77, 77, 16, 15, 19, 22, 20, 21, 24, 26, 24, 22, 20, 19, 21, 21, 21, 19, 18, 18, 20, 22, 23, 24, 25, 25, 25, 26, 26, 21, 26, 26, 27, 30, 28, 33, 41, 34, 32, 39, 42, 36, 31, 33, 35, 36, 36, 34, 31, 30, 30, 31, 39, 31, 35, 34, 36, 39, 35, 29, 29, 30, 31, 33, 39, 39, 33, 30, 30, 40, 46, 38, 41, 68, 72, 70, 79, 58, 65, 73, 51, 66, 69, 82, 76, 85, 87, 79, 71, 75, 80, 73, 63, 50, 35, 31, 47, 60, 57, 61, 64, 52, 51, 44, 53, 37, 27, 32, 33, 48, 66, 48, 52, 57, 52, 52, 55, 51, 32, 56, 65, 55, 53, 50, 68, 44, 57, 66, 70, 69, 43, 40, 20, 15, 33, 42, 38, 47, 42, 47, 52, 44, 39, 42, 40, 37, 39, 41, 40, 44, 49, 49, 49, 42, 40, 41, 35, 31, 35, 41, 43, 38, 39, 37, 34, 42, 24, 28, 36, 27, 28, 21, 23, 15, 12, 13, 14, 12, 12, 14, 16, 17, 17, 17, 17, 16, 15, 13, 14, 18, 16, 12, 12, 11, 7, 13, 10, 21, 29, 34, 39, 43, 44, 44, 43, 41, 39, 39, 43, 39, 42, 45, 40, 41, 43, 34, 34, 33, 65, 75, 74, 40, 38, 91, 71, 95, 87, 99, 94, 92, 97, 92, 82, 79, 67, 96, 73, 72, 73, 73, 76, 66, 66, 76, 86, 83, 82, 74, 56, 75, 77, 88, 87, 81, 76, 78, 79, 78, 78, 14, 14, 18, 22, 20, 21, 24, 24, 23, 21, 20, 20, 23, 24, 24, 22, 20, 18, 18, 19, 21, 22, 23, 23, 23, 23, 24, 20, 25, 25, 26, 29, 26, 30, 39, 31, 30, 37, 40, 36, 33, 32, 34, 35, 34, 32, 31, 30, 26, 26, 37, 28, 38, 34, 32, 35, 28, 25, 29, 31, 30, 30, 35, 34, 28, 29, 28, 39, 44, 36, 47, 71, 71, 65, 76, 47, 68, 76, 48, 68, 61, 83, 71, 88, 89, 90, 80, 70, 81, 77, 63, 49, 36, 36, 50, 60, 58, 67, 62, 59, 57, 51, 56, 43, 35, 37, 36, 47, 61, 48, 58, 62, 54, 53, 53, 45, 41, 51, 51, 62, 49, 39, 75, 43, 52, 66, 68, 67, 48, 39, 19, 17, 34, 39, 35, 44, 40, 43, 46, 47, 46, 44, 42, 39, 42, 47, 47, 50, 52, 49, 46, 39, 38, 40, 34, 30, 36, 43, 42, 38, 40, 38, 32, 39, 14, 26, 41, 36, 38, 36, 42, 34, 25, 22, 21, 16, 11, 12, 15, 16, 16, 16, 16, 15, 15, 14, 15, 18, 16, 12, 13, 12, 8, 11, 22, 30, 34, 38, 45, 44, 43, 43, 43, 42, 42, 43, 41, 42, 43, 40, 39, 39, 31, 34, 43, 75, 72, 68, 38, 34, 91, 71, 95, 97, 101, 85, 91, 94, 88, 87, 84, 76, 97, 78, 79, 82, 78, 77, 73, 74, 82, 86, 79, 80, 76, 60, 77, 77, 92, 91, 84, 81, 80, 75, 77, 78, 13, 12, 18, 21, 20, 20, 23, 20, 20, 19, 19, 21, 24, 26, 25, 22, 20, 18, 18, 19, 20, 22, 22, 22, 23, 23, 23, 19, 24, 23, 24, 29, 25, 27, 33, 27, 27, 33, 36, 35, 34, 31, 31, 32, 32, 33, 33, 31, 23, 22, 36, 26, 41, 35, 30, 31, 22, 22, 30, 33, 30, 28, 33, 31, 27, 30, 27, 37, 44, 35, 54, 71, 67, 55, 66, 50, 84, 81, 62, 74, 68, 72, 64, 85, 84, 94, 86, 66, 80, 77, 62, 49, 41, 44, 56, 63, 61, 71, 57, 63, 63, 60, 63, 56, 51, 51, 44, 52, 61, 50, 51, 56, 54, 49, 46, 49, 55, 48, 46, 60, 44, 45, 60, 39, 43, 62, 60, 61, 49, 36, 17, 19, 33, 36, 33, 41, 38, 39, 40, 53, 55, 46, 45, 44, 47, 49, 46, 47, 49, 45, 41, 34, 35, 39, 33, 29, 36, 43, 38, 31, 35, 35, 30, 37, 17, 30, 45, 39, 44, 47, 58, 48, 35, 30, 29, 22, 13, 12, 14, 15, 16, 15, 15, 14, 13, 12, 13, 16, 14, 11, 11, 13, 9, 12, 23, 31, 35, 38, 43, 42, 41, 42, 44, 45, 45, 44, 44, 43, 41, 39, 38, 36, 31, 38, 57, 86, 72, 64, 35, 30, 81, 64, 85, 101, 98, 79, 93, 93, 82, 85, 82, 79, 100, 85, 86, 87, 80, 81, 87, 86, 75, 78, 80, 79, 75, 63, 72, 76, 91, 88, 83, 82, 80, 74, 78, 78, 15, 13, 17, 20, 18, 18, 20, 19, 18, 18, 18, 19, 23, 23, 23, 23, 21, 18, 17, 18, 20, 21, 21, 22, 22, 22, 23, 20, 22, 23, 25, 27, 24, 26, 28, 25, 25, 29, 31, 33, 34, 29, 26, 27, 31, 33, 33, 30, 25, 23, 33, 27, 38, 34, 30, 30, 19, 19, 29, 31, 28, 27, 31, 29, 26, 29, 28, 35, 45, 33, 50, 66, 57, 47, 51, 63, 83, 81, 74, 76, 77, 59, 67, 80, 78, 89, 86, 67, 74, 74, 68, 59, 50, 64, 66, 73, 67, 76, 56, 59, 67, 69, 72, 64, 61, 65, 57, 58, 61, 54, 39, 53, 54, 44, 53, 56, 63, 44, 51, 56, 42, 54, 47, 39, 38, 53, 54, 57, 49, 37, 21, 19, 28, 35, 32, 40, 37, 37, 38, 53, 56, 47, 46, 47, 49, 48, 44, 44, 45, 41, 38, 31, 34, 32, 31, 28, 34, 42, 36, 30, 31, 35, 30, 39, 29, 39, 50, 41, 48, 51, 63, 54, 40, 39, 37, 33, 25, 27, 19, 12, 14, 17, 15, 12, 15, 13, 8, 13, 13, 10, 7, 7, 11, 11, 15, 25, 32, 36, 37, 40, 40, 40, 41, 43, 45, 47, 45, 44, 42, 40, 37, 36, 35, 30, 49, 79, 82, 69, 62, 35, 32, 60, 60, 79, 97, 96, 80, 98, 91, 79, 82, 77, 81, 95, 85, 88, 86, 80, 88, 93, 93, 72, 76, 85, 82, 79, 67, 68, 72, 91, 78, 77, 79, 77, 78, 83, 81, 21, 17, 17, 18, 14, 14, 17, 20, 19, 18, 16, 15, 18, 18, 17, 22, 21, 17, 13, 15, 19, 19, 19, 22, 20, 18, 20, 21, 20, 23, 27, 25, 23, 26, 26, 26, 26, 28, 30, 32, 33, 28, 22, 24, 30, 31, 28, 27, 29, 28, 27, 28, 29, 31, 32, 31, 21, 17, 27, 24, 24, 28, 28, 27, 24, 25, 29, 32, 45, 29, 37, 58, 44, 47, 38, 76, 57, 71, 70, 67, 76, 55, 81, 77, 82, 85, 85, 78, 63, 67, 75, 75, 61, 92, 74, 83, 73, 78, 57, 46, 66, 70, 73, 61, 57, 72, 69, 63, 59, 62, 37, 67, 56, 47, 71, 57, 63, 39, 59, 58, 40, 50, 53, 47, 42, 45, 54, 57, 50, 43, 31, 17, 19, 38, 33, 41, 37, 39, 40, 42, 46, 47, 47, 46, 45, 45, 46, 47, 45, 42, 38, 31, 35, 20, 28, 28, 32, 40, 40, 40, 34, 45, 35, 41, 41, 47, 54, 42, 54, 49, 62, 61, 49, 53, 48, 47, 40, 52, 31, 13, 18, 26, 20, 15, 26, 24, 5, 12, 8, 7, 6, 7, 14, 20, 26, 35, 39, 36, 35, 38, 40, 40, 41, 44, 48, 44, 39, 40, 39, 33, 34, 34, 25, 65, 102, 60, 67, 64, 39, 46, 39, 62, 82, 87, 100, 83, 97, 84, 81, 86, 81, 95, 78, 76, 87, 82, 81, 93, 83, 88, 83, 88, 90, 85, 88, 71, 72, 67, 92, 66, 71, 74, 72, 80, 88, 84, 22, 19, 19, 20, 17, 16, 18, 16, 19, 21, 19, 17, 16, 13, 13, 10, 16, 18, 16, 15, 18, 20, 20, 19, 22, 20, 17, 19, 19, 17, 21, 26, 25, 22, 24, 21, 21, 22, 24, 27, 29, 32, 30, 25, 26, 31, 32, 30, 29, 28, 26, 25, 26, 27, 28, 27, 28, 23, 20, 25, 20, 21, 32, 32, 27, 24, 26, 28, 28, 38, 28, 38, 56, 40, 46, 43, 82, 65, 75, 71, 70, 79, 57, 87, 83, 88, 88, 88, 79, 65, 60, 43, 59, 73, 88, 62, 60, 51, 56, 33, 28, 47, 50, 53, 55, 57, 57, 61, 74, 71, 64, 63, 69, 51, 58, 52, 52, 66, 54, 65, 51, 34, 45, 41, 47, 45, 45, 50, 55, 50, 43, 30, 16, 21, 42, 36, 42, 40, 40, 37, 35, 39, 44, 49, 48, 45, 43, 42, 40, 38, 35, 42, 32, 31, 16, 23, 28, 38, 43, 39, 36, 37, 44, 36, 39, 49, 49, 53, 45, 58, 51, 69, 80, 61, 61, 56, 53, 37, 45, 41, 43, 49, 41, 31, 36, 41, 34, 13, 10, 14, 14, 13, 11, 9, 16, 22, 28, 36, 40, 38, 36, 38, 40, 39, 40, 43, 45, 41, 37, 37, 36, 31, 30, 29, 24, 66, 70, 65, 95, 80, 38, 49, 53, 55, 71, 77, 103, 87, 92, 86, 89, 92, 86, 91, 83, 86, 97, 91, 85, 89, 76, 87, 88, 87, 75, 68, 84, 76, 76, 63, 83, 64, 75, 71, 68, 81, 83, 77, 22, 20, 22, 24, 21, 19, 19, 13, 19, 23, 23, 19, 14, 12, 12, 17, 20, 19, 21, 25, 24, 20, 20, 23, 20, 16, 18, 18, 17, 21, 26, 26, 23, 24, 20, 20, 20, 21, 24, 27, 28, 31, 26, 27, 31, 31, 28, 28, 28, 24, 22, 24, 25, 23, 24, 30, 29, 27, 29, 22, 24, 33, 31, 25, 24, 27, 28, 26, 33, 29, 40, 54, 37, 46, 51, 70, 63, 73, 69, 69, 75, 51, 79, 77, 82, 81, 82, 75, 60, 54, 46, 67, 73, 69, 62, 62, 62, 65, 39, 43, 57, 60, 56, 55, 61, 58, 57, 70, 70, 63, 63, 65, 43, 61, 49, 61, 55, 61, 70, 51, 42, 53, 40, 47, 49, 45, 44, 50, 49, 42, 33, 18, 23, 43, 35, 40, 42, 41, 39, 37, 38, 43, 47, 46, 43, 40, 38, 38, 37, 35, 39, 32, 29, 18, 26, 35, 44, 48, 42, 38, 46, 46, 41, 45, 66, 61, 60, 54, 67, 55, 71, 77, 61, 65, 69, 72, 54, 56, 52, 61, 66, 52, 42, 49, 54, 41, 12, 13, 12, 12, 9, 13, 10, 18, 24, 29, 37, 41, 39, 38, 39, 40, 39, 39, 40, 42, 40, 38, 40, 39, 33, 32, 31, 27, 65, 41, 58, 94, 76, 31, 41, 53, 44, 62, 66, 90, 86, 76, 84, 86, 89, 88, 88, 86, 87, 94, 91, 89, 96, 89, 96, 89, 81, 76, 80, 90, 72, 81, 70, 81, 57, 68, 64, 63, 74, 72, 67, 22, 21, 24, 27, 24, 21, 22, 12, 19, 25, 24, 19, 14, 12, 15, 20, 22, 22, 23, 27, 24, 19, 21, 24, 21, 18, 21, 22, 19, 20, 25, 24, 23, 24, 22, 21, 20, 20, 22, 24, 26, 30, 25, 25, 28, 28, 25, 27, 30, 24, 21, 22, 23, 21, 22, 30, 30, 29, 32, 25, 24, 28, 24, 22, 23, 26, 27, 29, 33, 32, 39, 51, 37, 46, 54, 53, 56, 68, 67, 69, 69, 46, 68, 68, 71, 69, 74, 74, 59, 59, 68, 77, 64, 56, 68, 58, 55, 55, 28, 39, 49, 52, 59, 57, 63, 70, 62, 61, 63, 65, 51, 67, 39, 56, 59, 72, 48, 61, 72, 61, 55, 59, 43, 47, 51, 44, 39, 45, 46, 41, 39, 21, 21, 38, 32, 34, 40, 43, 44, 44, 43, 43, 43, 41, 39, 38, 40, 42, 42, 40, 33, 29, 29, 27, 37, 44, 50, 53, 49, 45, 56, 50, 51, 59, 79, 74, 71, 65, 73, 58, 74, 80, 69, 72, 72, 76, 58, 70, 67, 62, 63, 61, 55, 57, 64, 50, 15, 11, 11, 12, 8, 13, 10, 19, 25, 30, 36, 40, 39, 39, 40, 40, 39, 38, 38, 39, 39, 39, 42, 41, 38, 35, 34, 26, 56, 32, 46, 71, 61, 30, 34, 43, 38, 58, 63, 69, 83, 61, 82, 76, 79, 86, 87, 84, 84, 90, 95, 99, 102, 95, 96, 89, 83, 84, 92, 94, 66, 77, 75, 82, 50, 59, 65, 67, 71, 72, 69, 23, 22, 26, 28, 25, 23, 23, 14, 19, 24, 23, 19, 16, 15, 16, 19, 21, 21, 23, 26, 22, 19, 23, 26, 23, 20, 24, 26, 21, 18, 21, 22, 22, 24, 22, 21, 19, 19, 21, 23, 26, 28, 23, 24, 26, 25, 23, 26, 31, 25, 20, 21, 22, 20, 22, 28, 25, 24, 31, 25, 21, 21, 18, 21, 24, 22, 24, 32, 34, 33, 35, 45, 36, 44, 51, 45, 54, 62, 63, 67, 64, 47, 64, 64, 65, 62, 70, 77, 66, 71, 75, 73, 58, 54, 69, 54, 58, 54, 32, 46, 50, 55, 63, 58, 63, 74, 65, 60, 63, 64, 51, 72, 41, 53, 59, 74, 56, 61, 70, 66, 61, 58, 45, 47, 51, 45, 38, 43, 44, 41, 43, 24, 17, 29, 29, 29, 38, 42, 46, 48, 46, 44, 42, 41, 40, 41, 43, 45, 44, 42, 29, 28, 28, 34, 44, 52, 56, 57, 55, 55, 62, 55, 59, 74, 82, 83, 81, 74, 76, 64, 76, 79, 78, 80, 75, 81, 70, 86, 78, 62, 63, 72, 71, 65, 73, 60, 21, 13, 12, 14, 9, 13, 10, 19, 25, 29, 34, 38, 38, 39, 39, 40, 40, 39, 38, 37, 35, 37, 40, 40, 39, 36, 33, 23, 42, 33, 37, 57, 49, 31, 32, 35, 38, 52, 61, 58, 78, 51, 83, 66, 67, 78, 81, 80, 82, 91, 104, 110, 102, 91, 90, 93, 92, 89, 90, 93, 68, 71, 73, 78, 48, 56, 66, 71, 73, 78, 77, 23, 22, 25, 28, 24, 22, 23, 17, 20, 23, 21, 20, 19, 19, 16, 17, 19, 20, 23, 25, 21, 18, 23, 28, 24, 21, 25, 28, 21, 15, 17, 19, 20, 22, 20, 18, 17, 17, 20, 23, 27, 27, 23, 23, 24, 23, 23, 27, 31, 26, 21, 19, 20, 20, 22, 26, 19, 19, 29, 25, 21, 18, 16, 23, 26, 19, 19, 32, 34, 33, 28, 38, 35, 40, 45, 48, 55, 54, 54, 60, 57, 52, 64, 65, 63, 58, 69, 80, 74, 81, 69, 64, 56, 55, 65, 52, 60, 52, 40, 53, 51, 61, 66, 63, 65, 66, 61, 65, 65, 53, 62, 71, 43, 56, 49, 67, 71, 62, 64, 66, 61, 55, 51, 49, 52, 48, 43, 45, 45, 43, 45, 26, 12, 22, 30, 27, 36, 39, 43, 45, 43, 43, 45, 44, 43, 44, 45, 44, 41, 37, 31, 31, 27, 38, 46, 57, 61, 60, 59, 63, 63, 60, 63, 85, 77, 84, 86, 81, 79, 72, 79, 75, 83, 87, 81, 93, 87, 96, 81, 66, 69, 82, 83, 73, 79, 67, 27, 15, 14, 16, 11, 9, 18, 25, 27, 32, 36, 36, 39, 39, 39, 40, 40, 39, 36, 34, 37, 38, 38, 39, 37, 32, 23, 33, 37, 34, 59, 42, 30, 33, 34, 37, 42, 55, 55, 70, 44, 78, 60, 54, 64, 65, 74, 76, 82, 100, 109, 98, 91, 93, 98, 99, 91, 84, 92, 74, 73, 69, 71, 49, 55, 60, 68, 74, 82, 80, 23, 21, 23, 25, 22, 20, 22, 21, 22, 22, 20, 20, 23, 23, 19, 19, 19, 21, 24, 26, 21, 18, 24, 29, 24, 20, 25, 26, 19, 13, 16, 19, 19, 21, 18, 17, 15, 16, 19, 23, 27, 26, 22, 22, 23, 22, 24, 28, 30, 27, 22, 18, 17, 20, 24, 26, 18, 17, 28, 26, 24, 20, 17, 24, 28, 18, 15, 30, 30, 32, 23, 33, 33, 36, 39, 53, 54, 44, 45, 49, 47, 55, 60, 64, 61, 54, 66, 81, 76, 83, 65, 61, 56, 54, 61, 52, 53, 42, 43, 52, 47, 61, 65, 70, 70, 55, 52, 69, 66, 40, 71, 63, 44, 61, 40, 58, 79, 62, 57, 63, 59, 54, 60, 53, 54, 55, 54, 51, 49, 46, 45, 31, 11, 17, 35, 28, 33, 34, 37, 37, 37, 41, 47, 49, 46, 44, 42, 40, 36, 32, 37, 36, 27, 40, 47, 60, 65, 65, 63, 70, 60, 66, 64, 92, 72, 81, 86, 84, 81, 81, 84, 79, 88, 90, 87, 103, 98, 94, 75, 71, 77, 86, 86, 78, 81, 70, 31, 17, 14, 16, 11, 9, 18, 25, 26, 29, 34, 35, 38, 38, 39, 42, 43, 41, 38, 38, 41, 40, 38, 40, 38, 34, 28, 32, 44, 37, 67, 34, 25, 33, 36, 32, 35, 46, 54, 58, 40, 63, 57, 44, 51, 49, 64, 66, 64, 80, 94, 94, 103, 107, 100, 99, 93, 86, 92, 79, 84, 66, 66, 52, 54, 49, 62, 74, 81, 76, 24, 20, 20, 22, 18, 17, 20, 22, 23, 22, 21, 22, 25, 26, 24, 22, 22, 22, 24, 24, 20, 19, 25, 29, 21, 16, 21, 23, 17, 14, 20, 23, 23, 22, 24, 21, 18, 16, 18, 22, 24, 23, 19, 20, 21, 20, 23, 28, 28, 27, 23, 16, 15, 20, 26, 27, 20, 17, 26, 25, 30, 26, 20, 25, 29, 20, 15, 28, 27, 32, 22, 31, 33, 35, 39, 49, 47, 35, 40, 41, 35, 53, 48, 56, 56, 49, 63, 78, 72, 78, 74, 64, 50, 55, 57, 51, 50, 36, 52, 56, 48, 68, 68, 72, 75, 56, 49, 66, 69, 42, 72, 56, 47, 61, 47, 53, 75, 64, 57, 62, 61, 56, 65, 59, 57, 64, 68, 60, 56, 52, 47, 39, 14, 18, 41, 27, 29, 31, 36, 36, 34, 37, 43, 47, 44, 39, 37, 37, 35, 34, 39, 40, 31, 49, 55, 67, 68, 74, 66, 73, 55, 73, 63, 94, 73, 80, 84, 86, 83, 89, 92, 98, 96, 91, 88, 102, 85, 79, 69, 72, 78, 84, 82, 77, 79, 72, 36, 20, 14, 16, 11, 8, 19, 26, 26, 28, 33, 34, 37, 36, 39, 43, 45, 43, 41, 45, 46, 42, 39, 41, 39, 34, 27, 31, 50, 43, 60, 22, 22, 33, 40, 26, 39, 40, 50, 46, 45, 41, 54, 38, 48, 46, 52, 58, 54, 66, 79, 88, 115, 115, 98, 97, 99, 89, 93, 83, 89, 67, 69, 58, 53, 45, 67, 82, 82, 74, 24, 19, 19, 19, 16, 15, 19, 23, 24, 23, 22, 23, 26, 28, 26, 23, 19, 18, 17, 15, 16, 19, 26, 28, 19, 13, 17, 21, 16, 17, 26, 30, 28, 26, 32, 29, 23, 19, 18, 20, 21, 19, 16, 17, 18, 17, 20, 26, 26, 27, 23, 14, 12, 19, 25, 24, 19, 14, 20, 21, 30, 29, 20, 24, 30, 23, 18, 29, 25, 34, 25, 33, 34, 36, 43, 40, 41, 34, 45, 43, 31, 51, 37, 48, 53, 48, 62, 78, 70, 74, 81, 60, 42, 68, 53, 40, 46, 31, 57, 57, 49, 73, 67, 63, 72, 70, 57, 64, 78, 70, 72, 63, 56, 56, 67, 51, 71, 72, 67, 68, 63, 54, 58, 64, 60, 71, 79, 67, 61, 57, 52, 48, 19, 19, 45, 25, 26, 31, 39, 41, 37, 34, 35, 39, 38, 32, 32, 36, 41, 44, 37, 41, 38, 62, 66, 73, 72, 82, 69, 76, 54, 81, 62, 94, 81, 82, 83, 88, 86, 93, 92, 96, 86, 81, 88, 108, 83, 77, 71, 70, 74, 81, 82, 74, 79, 76, 43, 26, 19, 22, 17, 9, 19, 27, 27, 29, 33, 35, 36, 36, 39, 44, 47, 45, 42, 47, 47, 41, 36, 37, 35, 27, 14, 25, 54, 48, 44, 17, 30, 35, 44, 25, 58, 45, 44, 42, 55, 24, 56, 42, 57, 58, 40, 60, 67, 77, 78, 77, 102, 99, 95, 104, 97, 76, 86, 87, 78, 64, 73, 63, 55, 58, 91, 102, 96, 85, 22, 14, 17, 16, 12, 15, 15, 22, 20, 20, 20, 22, 22, 23, 24, 23, 17, 14, 17, 20, 18, 15, 17, 20, 17, 18, 27, 45, 25, 13, 10, 20, 29, 29, 22, 21, 21, 22, 22, 22, 23, 23, 24, 21, 19, 20, 21, 21, 23, 25, 23, 20, 15, 14, 17, 21, 21, 19, 18, 17, 20, 34, 33, 20, 22, 28, 21, 21, 26, 27, 30, 27, 28, 30, 36, 43, 40, 48, 40, 43, 42, 34, 51, 40, 51, 51, 48, 60, 72, 71, 70, 67, 63, 48, 54, 50, 39, 44, 39, 55, 61, 60, 74, 67, 75, 80, 59, 59, 80, 71, 68, 73, 75, 72, 67, 67, 62, 77, 74, 67, 66, 69, 65, 59, 76, 68, 72, 66, 70, 61, 64, 55, 49, 23, 30, 28, 28, 25, 35, 45, 47, 43, 41, 38, 37, 36, 35, 36, 38, 42, 44, 42, 45, 49, 65, 73, 70, 71, 83, 71, 84, 71, 75, 70, 69, 89, 78, 81, 83, 91, 84, 98, 91, 80, 80, 89, 80, 71, 52, 60, 68, 77, 78, 75, 74, 79, 78, 55, 28, 17, 20, 18, 9, 19, 27, 28, 29, 33, 35, 37, 38, 40, 43, 44, 41, 39, 45, 45, 40, 37, 38, 34, 28, 19, 27, 46, 44, 42, 20, 21, 33, 33, 43, 55, 44, 43, 37, 52, 21, 40, 34, 43, 58, 42, 62, 68, 74, 64, 70, 94, 93, 97, 97, 97, 85, 107, 83, 68, 67, 82, 79, 77, 65, 74, 79, 79, 82, 19, 12, 17, 15, 11, 14, 12, 18, 16, 16, 18, 20, 19, 20, 23, 23, 17, 14, 19, 23, 19, 13, 14, 17, 15, 16, 27, 46, 26, 12, 21, 27, 27, 21, 20, 21, 22, 23, 23, 23, 22, 25, 23, 22, 21, 22, 22, 22, 22, 21, 18, 16, 15, 17, 19, 19, 20, 21, 18, 19, 32, 33, 22, 24, 28, 21, 22, 26, 27, 27, 27, 26, 28, 34, 41, 40, 47, 41, 45, 47, 38, 50, 46, 52, 54, 55, 57, 66, 74, 72, 67, 66, 50, 48, 49, 43, 50, 46, 55, 61, 64, 77, 77, 70, 65, 63, 68, 78, 73, 70, 76, 82, 82, 77, 73, 72, 78, 79, 77, 78, 82, 78, 68, 70, 67, 72, 72, 77, 64, 65, 56, 47, 23, 31, 21, 34, 26, 32, 41, 43, 44, 44, 39, 37, 38, 38, 40, 42, 44, 45, 42, 44, 56, 70, 81, 73, 73, 87, 72, 87, 79, 71, 71, 67, 82, 76, 81, 79, 83, 85, 96, 79, 73, 78, 94, 73, 82, 53, 63, 74, 79, 75, 71, 71, 76, 77, 59, 30, 18, 21, 22, 12, 19, 26, 28, 30, 34, 38, 35, 36, 39, 42, 43, 41, 39, 43, 43, 40, 39, 39, 35, 32, 27, 40, 44, 43, 44, 21, 19, 31, 30, 48, 53, 45, 38, 36, 45, 26, 29, 30, 36, 57, 46, 53, 57, 67, 59, 67, 79, 84, 91, 90, 95, 87, 113, 81, 60, 59, 73, 76, 81, 67, 73, 81, 81, 85, 18, 13, 19, 18, 13, 14, 12, 17, 15, 15, 17, 20, 20, 20, 23, 23, 18, 16, 22, 26, 20, 14, 14, 16, 13, 14, 23, 35, 21, 16, 23, 23, 22, 19, 23, 24, 24, 24, 23, 22, 21, 24, 24, 23, 23, 22, 21, 20, 19, 18, 17, 16, 16, 17, 18, 19, 21, 23, 20, 18, 27, 31, 24, 26, 28, 20, 21, 24, 25, 26, 27, 27, 28, 33, 38, 38, 42, 38, 48, 52, 41, 43, 51, 49, 58, 62, 53, 58, 75, 74, 71, 69, 50, 45, 49, 46, 52, 51, 61, 64, 65, 77, 79, 61, 55, 75, 72, 66, 81, 77, 81, 86, 87, 84, 81, 79, 84, 88, 88, 87, 86, 80, 71, 71, 70, 71, 79, 79, 66, 67, 59, 45, 21, 29, 19, 40, 29, 29, 33, 36, 42, 45, 40, 39, 40, 42, 43, 45, 45, 46, 40, 41, 63, 77, 87, 76, 75, 89, 71, 88, 84, 70, 69, 75, 82, 78, 79, 73, 68, 88, 88, 73, 72, 77, 90, 64, 83, 53, 65, 76, 76, 70, 70, 72, 73, 74, 61, 33, 20, 23, 26, 14, 18, 25, 27, 29, 33, 39, 34, 34, 37, 42, 44, 42, 41, 43, 43, 41, 40, 42, 38, 36, 29, 52, 40, 39, 46, 25, 20, 28, 32, 47, 55, 48, 33, 39, 39, 31, 27, 29, 31, 54, 48, 43, 46, 58, 54, 65, 65, 74, 83, 84, 91, 83, 110, 79, 62, 57, 68, 74, 84, 71, 77, 86, 83, 84, 18, 14, 22, 22, 16, 16, 13, 17, 15, 16, 19, 21, 22, 21, 23, 24, 19, 17, 23, 27, 22, 17, 16, 16, 13, 13, 19, 25, 15, 17, 23, 18, 18, 17, 24, 25, 25, 24, 23, 22, 20, 23, 24, 24, 23, 21, 19, 18, 17, 17, 17, 17, 17, 18, 17, 19, 23, 25, 21, 17, 22, 27, 22, 24, 25, 18, 19, 21, 22, 24, 27, 28, 29, 32, 36, 37, 37, 35, 48, 52, 40, 34, 51, 44, 58, 64, 46, 49, 71, 70, 72, 70, 51, 43, 50, 49, 49, 52, 66, 70, 66, 73, 73, 63, 63, 81, 70, 62, 89, 85, 85, 89, 90, 89, 87, 85, 88, 90, 89, 86, 83, 78, 72, 83, 80, 69, 80, 73, 64, 71, 65, 44, 20, 27, 18, 46, 31, 27, 29, 32, 40, 46, 43, 42, 43, 44, 44, 44, 43, 43, 39, 38, 71, 82, 89, 77, 76, 84, 70, 89, 88, 70, 66, 80, 93, 82, 74, 68, 55, 88, 73, 68, 68, 74, 79, 59, 76, 47, 60, 71, 67, 63, 72, 78, 71, 71, 63, 37, 22, 23, 28, 14, 16, 22, 25, 27, 32, 38, 34, 34, 37, 42, 44, 44, 42, 42, 44, 43, 42, 44, 40, 37, 29, 56, 31, 33, 43, 31, 22, 29, 35, 46, 61, 52, 34, 42, 39, 34, 34, 31, 28, 48, 50, 39, 43, 50, 44, 62, 58, 68, 78, 80, 87, 79, 105, 76, 69, 64, 74, 79, 91, 77, 79, 81, 76, 75, 20, 17, 25, 25, 20, 19, 14, 16, 15, 15, 19, 21, 22, 22, 24, 25, 21, 19, 23, 26, 23, 20, 19, 18, 15, 15, 18, 21, 14, 18, 22, 16, 17, 17, 21, 22, 22, 22, 21, 20, 19, 21, 23, 24, 22, 19, 17, 17, 18, 18, 18, 19, 19, 17, 17, 20, 24, 24, 20, 17, 19, 22, 18, 20, 21, 14, 17, 18, 19, 21, 25, 26, 27, 28, 30, 36, 33, 34, 45, 47, 36, 29, 46, 41, 54, 59, 42, 44, 64, 64, 71, 71, 56, 44, 52, 53, 49, 49, 64, 72, 69, 73, 69, 76, 79, 74, 71, 74, 88, 90, 89, 89, 90, 91, 90, 88, 78, 77, 76, 80, 85, 88, 87, 87, 89, 72, 81, 66, 62, 75, 75, 45, 18, 26, 20, 48, 31, 28, 29, 32, 38, 44, 45, 45, 45, 42, 40, 39, 39, 40, 39, 36, 81, 83, 84, 76, 78, 73, 72, 92, 90, 73, 66, 80, 99, 80, 65, 65, 50, 88, 55, 50, 53, 71, 70, 80, 82, 54, 55, 64, 56, 54, 68, 81, 68, 68, 64, 41, 22, 20, 26, 13, 13, 17, 22, 24, 29, 35, 33, 33, 36, 39, 42, 42, 40, 42, 43, 43, 44, 46, 42, 36, 33, 56, 23, 26, 33, 38, 22, 33, 38, 41, 67, 53, 42, 43, 41, 35, 47, 38, 30, 38, 55, 43, 47, 44, 33, 60, 58, 68, 78, 79, 84, 75, 99, 70, 72, 71, 80, 83, 95, 84, 80, 72, 65, 63, 20, 17, 25, 25, 21, 20, 15, 13, 11, 12, 15, 18, 19, 20, 25, 26, 21, 18, 22, 24, 22, 21, 21, 19, 16, 16, 16, 24, 19, 21, 24, 20, 23, 22, 15, 15, 16, 16, 17, 16, 16, 18, 22, 22, 20, 17, 16, 17, 22, 20, 20, 21, 21, 17, 17, 23, 25, 22, 19, 18, 19, 18, 15, 19, 18, 13, 18, 18, 14, 17, 21, 23, 23, 24, 25, 35, 30, 35, 41, 41, 38, 32, 42, 43, 51, 54, 47, 49, 59, 62, 72, 73, 63, 49, 53, 61, 57, 49, 60, 72, 74, 80, 78, 91, 80, 60, 82, 93, 77, 93, 94, 90, 89, 90, 90, 88, 73, 70, 72, 82, 92, 96, 94, 68, 84, 79, 88, 64, 59, 76, 83, 44, 18, 26, 25, 45, 29, 29, 32, 35, 35, 38, 43, 46, 43, 39, 37, 37, 39, 42, 39, 33, 89, 81, 78, 77, 88, 60, 76, 96, 92, 80, 67, 71, 77, 68, 59, 63, 46, 85, 48, 43, 43, 73, 67, 112, 89, 72, 63, 65, 50, 44, 57, 72, 63, 65, 63, 43, 22, 17, 22, 14, 11, 16, 22, 24, 27, 35, 32, 32, 33, 36, 38, 38, 37, 41, 43, 43, 44, 45, 40, 36, 47, 55, 22, 24, 25, 46, 21, 35, 37, 34, 68, 48, 48, 41, 36, 38, 53, 47, 33, 24, 63, 49, 47, 40, 29, 58, 55, 68, 76, 77, 83, 72, 95, 65, 66, 68, 76, 75, 89, 86, 84, 73, 61, 56, 19, 14, 20, 20, 17, 19, 15, 14, 12, 12, 15, 18, 18, 19, 24, 25, 21, 17, 20, 21, 19, 19, 20, 17, 16, 17, 15, 23, 20, 21, 22, 19, 23, 21, 14, 15, 16, 18, 19, 19, 19, 17, 21, 22, 19, 16, 17, 19, 24, 20, 20, 21, 22, 18, 18, 23, 25, 22, 18, 20, 20, 19, 16, 20, 19, 14, 20, 21, 17, 19, 24, 25, 25, 25, 26, 31, 28, 36, 41, 40, 43, 39, 47, 47, 50, 52, 54, 57, 60, 66, 72, 73, 69, 54, 54, 65, 64, 61, 77, 86, 80, 78, 77, 94, 81, 61, 84, 92, 78, 95, 94, 89, 89, 90, 87, 83, 67, 66, 72, 81, 83, 80, 77, 64, 78, 77, 78, 56, 60, 78, 81, 44, 19, 25, 31, 41, 29, 30, 34, 37, 34, 34, 39, 42, 40, 37, 36, 39, 43, 46, 38, 28, 95, 80, 77, 83, 98, 60, 79, 95, 90, 81, 65, 66, 59, 69, 72, 69, 44, 78, 55, 57, 47, 75, 65, 114, 74, 74, 67, 64, 52, 44, 51, 66, 60, 62, 64, 46, 24, 15, 18, 16, 12, 17, 25, 27, 28, 36, 37, 36, 36, 39, 41, 41, 40, 42, 44, 43, 43, 43, 37, 31, 43, 42, 19, 24, 26, 54, 22, 32, 35, 28, 57, 36, 47, 32, 22, 44, 44, 49, 38, 16, 68, 51, 40, 38, 35, 54, 45, 63, 72, 72, 79, 70, 95, 68, 78, 77, 76, 68, 82, 82, 84, 72, 61, 57, 20, 13, 17, 16, 14, 19, 16, 16, 14, 14, 17, 18, 18, 18, 21, 23, 19, 16, 19, 20, 18, 18, 20, 18, 18, 20, 15, 19, 17, 21, 20, 15, 19, 18, 15, 16, 18, 20, 21, 22, 22, 17, 21, 22, 19, 17, 20, 23, 24, 19, 17, 21, 22, 20, 18, 22, 25, 22, 20, 23, 22, 20, 19, 23, 21, 15, 22, 22, 19, 22, 26, 27, 27, 27, 28, 31, 25, 37, 42, 40, 45, 39, 53, 47, 46, 51, 56, 59, 61, 66, 68, 67, 70, 57, 57, 70, 74, 76, 89, 91, 78, 73, 70, 90, 82, 63, 80, 85, 82, 92, 89, 86, 87, 89, 82, 73, 54, 59, 70, 77, 75, 75, 80, 71, 77, 76, 67, 53, 62, 75, 72, 42, 19, 22, 36, 39, 33, 31, 34, 39, 37, 35, 37, 39, 38, 38, 38, 40, 43, 45, 40, 23, 95, 78, 78, 84, 100, 68, 79, 88, 84, 73, 57, 65, 58, 73, 76, 69, 46, 70, 58, 60, 42, 67, 69, 102, 66, 71, 67, 62, 57, 49, 49, 61, 58, 61, 63, 49, 27, 16, 17, 16, 12, 17, 27, 28, 29, 36, 38, 38, 38, 42, 45, 45, 44, 43, 44, 43, 42, 41, 34, 26, 35, 30, 18, 23, 30, 51, 23, 27, 38, 28, 43, 25, 41, 23, 16, 42, 33, 43, 43, 19, 60, 52, 38, 39, 37, 48, 40, 56, 64, 65, 72, 64, 91, 68, 86, 84, 81, 70, 82, 78, 77, 68, 58, 56, 22, 13, 15, 14, 12, 20, 19, 16, 14, 13, 15, 17, 17, 16, 18, 20, 17, 15, 19, 20, 17, 19, 21, 19, 21, 23, 18, 17, 16, 23, 20, 13, 17, 16, 14, 15, 17, 18, 20, 20, 20, 18, 22, 22, 19, 18, 22, 26, 22, 16, 15, 19, 23, 21, 19, 21, 25, 23, 23, 25, 23, 21, 22, 25, 21, 15, 22, 20, 17, 20, 24, 25, 24, 25, 26, 32, 23, 37, 42, 40, 44, 33, 57, 44, 42, 49, 53, 55, 59, 64, 61, 58, 68, 59, 59, 78, 88, 84, 86, 77, 67, 73, 69, 86, 75, 59, 81, 85, 82, 84, 81, 81, 86, 87, 77, 64, 63, 70, 78, 76, 68, 71, 83, 71, 76, 81, 69, 58, 65, 70, 61, 39, 20, 17, 39, 38, 39, 33, 34, 42, 43, 39, 37, 38, 39, 40, 40, 40, 40, 38, 43, 20, 93, 75, 78, 83, 94, 78, 76, 78, 76, 62, 46, 66, 63, 70, 69, 64, 50, 67, 63, 67, 43, 61, 75, 83, 59, 66, 66, 61, 62, 53, 45, 53, 55, 59, 62, 51, 31, 17, 16, 15, 13, 10, 17, 28, 28, 27, 34, 35, 35, 36, 40, 44, 46, 45, 43, 45, 43, 41, 39, 31, 25, 34, 28, 20, 21, 33, 38, 21, 22, 42, 32, 31, 19, 34, 15, 15, 35, 28, 35, 48, 26, 46, 54, 43, 41, 36, 41, 42, 51, 59, 59, 65, 58, 86, 62, 76, 79, 81, 76, 87, 75, 72, 67, 56, 53, 20, 13, 14, 13, 13, 19, 19, 13, 11, 12, 15, 16, 14, 13, 15, 17, 15, 14, 17, 19, 19, 21, 22, 20, 21, 22, 19, 15, 18, 27, 23, 14, 16, 17, 14, 13, 15, 17, 18, 18, 17, 20, 22, 22, 20, 21, 26, 30, 23, 17, 15, 20, 23, 22, 18, 18, 28, 26, 20, 25, 23, 21, 22, 26, 21, 16, 20, 19, 16, 18, 20, 20, 20, 22, 24, 33, 22, 32, 40, 39, 38, 30, 57, 41, 43, 44, 45, 52, 57, 59, 57, 56, 67, 65, 67, 84, 93, 82, 75, 63, 52, 71, 68, 82, 70, 66, 82, 84, 81, 80, 82, 76, 79, 78, 68, 64, 79, 82, 80, 71, 61, 73, 76, 72, 78, 81, 66, 67, 66, 64, 53, 37, 20, 21, 39, 38, 40, 34, 34, 42, 45, 41, 40, 39, 41, 43, 44, 43, 40, 37, 46, 17, 90, 77, 78, 82, 83, 83, 74, 71, 67, 49, 45, 59, 59, 64, 64, 65, 53, 63, 66, 74, 56, 65, 77, 75, 48, 63, 68, 65, 67, 56, 46, 52, 55, 55, 60, 56, 39, 22, 18, 16, 11, 16, 26, 27, 26, 31, 31, 33, 34, 36, 39, 42, 44, 44, 45, 43, 41, 38, 31, 28, 34, 31, 20, 22, 33, 27, 23, 20, 46, 37, 27, 16, 30, 16, 17, 28, 28, 29, 44, 38, 34, 56, 51, 41, 33, 38, 44, 47, 54, 54, 59, 57, 76, 58, 67, 74, 75, 79, 85, 67, 66, 64, 53, 52, 16, 13, 11, 12, 14, 16, 16, 12, 13, 10, 12, 18, 19, 14, 12, 16, 15, 14, 13, 14, 18, 22, 23, 21, 20, 18, 18, 18, 14, 20, 27, 24, 17, 16, 19, 18, 15, 14, 17, 20, 20, 18, 20, 20, 21, 21, 24, 29, 32, 27, 20, 18, 23, 24, 19, 15, 17, 33, 30, 14, 23, 23, 20, 21, 25, 19, 16, 17, 18, 17, 19, 18, 17, 17, 21, 25, 34, 22, 25, 39, 41, 35, 34, 56, 44, 51, 37, 37, 50, 54, 49, 57, 63, 69, 74, 79, 83, 84, 75, 70, 60, 40, 63, 67, 79, 74, 88, 81, 76, 82, 82, 88, 71, 70, 64, 59, 75, 79, 75, 66, 61, 59, 79, 61, 80, 84, 70, 49, 68, 63, 60, 51, 36, 19, 31, 36, 39, 36, 32, 34, 40, 40, 40, 43, 43, 43, 46, 48, 48, 46, 43, 48, 16, 87, 82, 79, 81, 73, 81, 75, 65, 58, 38, 56, 46, 47, 58, 68, 75, 48, 54, 62, 73, 73, 73, 77, 85, 37, 64, 68, 70, 73, 59, 52, 58, 58, 53, 57, 62, 51, 31, 22, 20, 17, 18, 22, 25, 27, 28, 31, 34, 35, 34, 34, 38, 43, 45, 43, 43, 42, 39, 33, 31, 28, 32, 15, 29, 33, 24, 32, 22, 46, 41, 31, 14, 27, 26, 19, 22, 29, 26, 29, 47, 28, 54, 53, 38, 35, 38, 45, 44, 49, 50, 54, 62, 63, 60, 71, 78, 66, 79, 74, 55, 60, 57, 48, 54, 15, 13, 12, 11, 12, 15, 17, 16, 14, 16, 21, 23, 19, 17, 19, 18, 17, 15, 17, 20, 22, 22, 21, 19, 18, 18, 18, 14, 18, 25, 22, 17, 15, 17, 20, 19, 18, 20, 21, 22, 21, 19, 19, 20, 20, 21, 26, 28, 23, 19, 19, 21, 19, 13, 12, 17, 31, 27, 13, 23, 22, 19, 20, 24, 19, 15, 16, 17, 19, 21, 21, 20, 20, 23, 26, 34, 24, 27, 41, 45, 41, 42, 57, 53, 52, 38, 38, 39, 44, 36, 50, 61, 68, 72, 78, 81, 80, 71, 68, 60, 43, 62, 76, 82, 81, 83, 86, 81, 74, 81, 79, 67, 69, 67, 67, 80, 66, 56, 56, 66, 68, 63, 49, 90, 81, 63, 38, 57, 61, 56, 51, 36, 16, 33, 36, 39, 36, 34, 35, 41, 42, 41, 42, 44, 44, 46, 46, 45, 43, 40, 39, 27, 84, 81, 78, 77, 73, 78, 77, 61, 52, 47, 64, 56, 44, 53, 66, 80, 38, 52, 64, 75, 71, 74, 91, 86, 33, 57, 60, 60, 81, 63, 41, 49, 58, 58, 61, 62, 53, 35, 23, 17, 17, 16, 17, 22, 25, 23, 36, 37, 37, 34, 34, 38, 43, 46, 44, 42, 41, 39, 33, 31, 28, 32, 15, 35, 33, 22, 33, 25, 43, 39, 27, 8, 22, 27, 20, 20, 25, 24, 27, 41, 23, 40, 44, 43, 42, 43, 56, 48, 52, 51, 52, 60, 66, 65, 69, 76, 67, 78, 69, 53, 56, 50, 45, 51, 13, 14, 13, 13, 10, 9, 12, 16, 16, 14, 14, 18, 21, 19, 18, 20, 20, 18, 16, 16, 20, 21, 21, 20, 19, 18, 18, 18, 16, 18, 21, 21, 18, 15, 15, 19, 21, 21, 20, 20, 21, 22, 16, 18, 19, 19, 19, 21, 23, 18, 20, 21, 20, 18, 13, 14, 18, 28, 23, 13, 23, 21, 18, 20, 22, 17, 13, 15, 17, 20, 22, 22, 20, 21, 24, 26, 32, 22, 24, 36, 40, 39, 39, 48, 57, 52, 45, 46, 40, 49, 48, 59, 67, 70, 75, 84, 86, 82, 69, 64, 57, 49, 66, 81, 83, 91, 79, 84, 81, 69, 78, 65, 63, 68, 69, 73, 79, 61, 40, 48, 72, 77, 48, 51, 83, 67, 58, 37, 57, 69, 58, 58, 39, 18, 33, 38, 37, 36, 34, 34, 40, 43, 41, 38, 40, 41, 42, 42, 42, 41, 39, 31, 43, 81, 78, 76, 75, 76, 75, 79, 60, 48, 46, 51, 45, 52, 55, 66, 85, 36, 56, 69, 72, 69, 73, 99, 80, 40, 54, 54, 58, 81, 63, 43, 44, 55, 60, 62, 60, 56, 43, 25, 16, 19, 16, 14, 21, 25, 21, 33, 35, 35, 33, 33, 39, 44, 46, 44, 41, 40, 38, 35, 31, 29, 31, 14, 43, 32, 18, 31, 26, 38, 34, 24, 7, 18, 28, 21, 19, 22, 22, 24, 34, 29, 36, 41, 48, 45, 42, 56, 53, 55, 52, 50, 55, 63, 66, 66, 71, 67, 74, 60, 48, 50, 42, 43, 49, 12, 14, 14, 13, 10, 7, 13, 10, 16, 18, 15, 14, 16, 18, 17, 16, 18, 18, 17, 15, 14, 16, 19, 20, 19, 18, 17, 18, 18, 17, 17, 19, 19, 19, 17, 14, 17, 20, 21, 18, 17, 18, 20, 15, 18, 20, 19, 18, 18, 18, 16, 21, 22, 21, 20, 20, 19, 18, 25, 18, 11, 24, 20, 16, 19, 21, 15, 12, 14, 17, 19, 21, 21, 20, 20, 22, 25, 30, 21, 21, 30, 34, 32, 32, 38, 55, 46, 49, 47, 44, 51, 53, 54, 57, 62, 71, 81, 86, 83, 66, 62, 58, 62, 80, 80, 82, 93, 75, 74, 76, 74, 76, 58, 70, 74, 71, 74, 75, 69, 39, 50, 75, 78, 44, 69, 78, 66, 73, 58, 71, 83, 63, 66, 41, 24, 28, 43, 33, 35, 34, 32, 38, 43, 40, 35, 36, 36, 37, 38, 40, 41, 41, 28, 56, 79, 73, 72, 75, 79, 69, 72, 63, 57, 46, 37, 35, 61, 59, 64, 81, 46, 60, 66, 63, 68, 70, 94, 67, 54, 58, 54, 61, 74, 58, 53, 46, 50, 58, 60, 56, 58, 51, 31, 17, 21, 18, 15, 23, 28, 22, 25, 29, 32, 32, 34, 39, 44, 47, 44, 41, 40, 39, 36, 32, 31, 29, 12, 48, 29, 16, 24, 27, 36, 28, 23, 12, 16, 26, 21, 18, 21, 23, 24, 27, 31, 39, 43, 49, 46, 41, 53, 54, 56, 52, 47, 49, 57, 63, 64, 67, 65, 67, 50, 41, 43, 36, 42, 46, 13, 10, 15, 15, 13, 10, 7, 13, 10, 15, 21, 18, 16, 16, 16, 15, 15, 16, 17, 16, 13, 12, 14, 17, 19, 18, 17, 17, 17, 18, 18, 18, 18, 19, 20, 18, 15, 15, 18, 19, 17, 14, 15, 19, 16, 18, 20, 19, 17, 16, 16, 16, 22, 22, 19, 22, 24, 23, 17, 22, 16, 13, 10, 24, 20, 16, 18, 20, 14, 11, 15, 17, 19, 21, 21, 20, 20, 21, 23, 30, 23, 22, 28, 32, 31, 30, 33, 52, 40, 49, 40, 47, 46, 52, 48, 50, 61, 75, 83, 84, 78, 65, 65, 64, 76, 90, 78, 81, 83, 73, 69, 76, 80, 76, 58, 81, 82, 72, 69, 68, 73, 43, 57, 76, 71, 43, 84, 71, 63, 80, 68, 68, 77, 55, 69, 40, 29, 21, 49, 30, 36, 36, 33, 38, 43, 40, 35, 36, 37, 38, 39, 40, 42, 42, 27, 61, 74, 64, 66, 74, 78, 64, 60, 66, 72, 51, 38, 44, 62, 61, 63, 74, 63, 58, 57, 59, 66, 68, 89, 57, 58, 59, 58, 61, 68, 52, 59, 48, 48, 57, 61, 55, 59, 55, 36, 18, 21, 18, 16, 25, 31, 26, 19, 26, 32, 34, 34, 38, 42, 47, 44, 41, 40, 39, 37, 34, 34, 27, 12, 49, 24, 17, 18, 30, 37, 23, 22, 20, 13, 21, 21, 19, 22, 25, 26, 23, 28, 43, 46, 48, 47, 44, 52, 50, 53, 51, 47, 47, 55, 63, 66, 65, 63, 61, 43, 38, 39, 33, 43, 43, 13, 10, 15, 15, 11, 9, 13, 10, 15, 22, 20, 18, 16, 15, 13, 13, 15, 16, 16, 13, 12, 14, 17, 18, 17, 17, 17, 17, 17, 19, 19, 18, 19, 20, 18, 16, 15, 17, 18, 17, 14, 15, 18, 16, 19, 21, 20, 17, 16, 16, 19, 24, 21, 17, 21, 24, 22, 17, 22, 16, 13, 10, 24, 20, 16, 18, 20, 14, 11, 15, 18, 20, 22, 23, 21, 21, 21, 23, 28, 23, 23, 28, 32, 32, 31, 31, 48, 37, 47, 35, 54, 44, 51, 47, 52, 67, 80, 83, 79, 72, 67, 74, 70, 82, 86, 74, 80, 69, 72, 72, 80, 83, 75, 59, 87, 82, 69, 58, 58, 68, 44, 65, 76, 59, 45, 85, 62, 59, 79, 69, 57, 66, 49, 67, 37, 31, 14, 52, 29, 39, 38, 35, 39, 43, 41, 38, 40, 41, 41, 41, 42, 42, 42, 28, 61, 64, 56, 59, 73, 73, 62, 50, 66, 81, 54, 43, 62, 57, 61, 63, 71, 79, 57, 50, 59, 65, 68, 87, 53, 53, 56, 60, 56, 68, 48, 56, 49, 50, 59, 63, 55, 58, 56, 39, 19, 19, 17, 17, 24, 30, 28, 19, 26, 33, 35, 35, 36, 39, 47, 44, 42, 41, 40, 38, 35, 36, 27, 15, 48, 20, 18, 14, 35, 38, 19, 21, 25, 9, 16, 22, 21, 22, 27, 27, 21, 27, 47, 48, 45, 46, 45, 49, 44, 48, 50, 50, 50, 56, 65, 69, 65, 62, 56, 42, 39, 37, 33, 42, 37, 11, 14, 14, 12, 11, 12, 14, 19, 18, 17, 15, 12, 13, 10, 11, 15, 16, 16, 14, 14, 15, 17, 17, 17, 16, 16, 16, 17, 19, 19, 18, 19, 19, 18, 16, 16, 17, 17, 18, 17, 18, 19, 16, 19, 20, 19, 17, 16, 16, 20, 25, 19, 15, 19, 21, 19, 17, 23, 17, 13, 10, 23, 20, 16, 18, 19, 14, 11, 15, 19, 20, 23, 24, 22, 21, 21, 23, 22, 20, 22, 27, 32, 32, 30, 29, 41, 34, 45, 37, 65, 49, 49, 49, 57, 70, 77, 75, 71, 71, 73, 82, 70, 78, 71, 71, 78, 62, 73, 79, 83, 80, 73, 59, 82, 72, 61, 43, 48, 58, 41, 67, 74, 48, 49, 72, 59, 60, 79, 73, 53, 66, 57, 64, 36, 31, 14, 51, 31, 42, 39, 36, 41, 43, 41, 41, 44, 45, 45, 44, 43, 41, 39, 29, 58, 54, 53, 54, 72, 66, 64, 48, 64, 79, 53, 45, 76, 53, 60, 64, 71, 86, 60, 51, 61, 64, 68, 84, 54, 48, 51, 59, 49, 72, 47, 53, 49, 51, 59, 64, 56, 56, 53, 41, 22, 16, 15, 18, 22, 25, 29, 22, 29, 35, 35, 34, 34, 37, 46, 44, 42, 42, 41, 37, 35, 35, 26, 21, 45, 16, 20, 13, 40, 34, 17, 20, 25, 8, 15, 23, 23, 20, 25, 28, 20, 33, 49, 47, 43, 43, 39, 42, 40, 42, 47, 52, 53, 59, 67, 71, 65, 59, 51, 45, 44, 36, 33, 41, 29, 12, 13, 14, 14, 14, 14, 14, 14, 16, 16, 15, 12, 13, 10, 11, 15, 16, 17, 16, 15, 16, 17, 16, 16, 15, 15, 16, 17, 18, 18, 19, 18, 16, 16, 16, 17, 16, 16, 18, 19, 20, 19, 16, 18, 19, 17, 16, 16, 17, 19, 25, 20, 16, 21, 19, 16, 17, 24, 18, 13, 10, 22, 20, 17, 19, 20, 14, 12, 16, 20, 20, 21, 23, 22, 20, 20, 21, 18, 18, 20, 25, 29, 29, 25, 29, 35, 32, 37, 39, 71, 50, 40, 46, 53, 60, 63, 61, 62, 69, 74, 83, 66, 75, 62, 71, 74, 70, 78, 81, 77, 73, 74, 59, 71, 57, 53, 32, 43, 50, 36, 64, 71, 40, 57, 55, 61, 70, 88, 86, 63, 80, 78, 66, 42, 29, 23, 45, 35, 41, 38, 36, 39, 39, 39, 42, 43, 43, 44, 43, 42, 38, 35, 31, 57, 45, 57, 54, 73, 61, 63, 53, 63, 72, 52, 42, 81, 51, 55, 58, 69, 78, 67, 59, 58, 63, 69, 75, 55, 51, 47, 55, 48, 73, 49, 59, 51, 49, 55, 61, 55, 51, 48, 42, 28, 16, 14, 19, 19, 20, 28, 24, 29, 32, 32, 31, 34, 38, 45, 43, 43, 43, 42, 37, 34, 33, 26, 29, 44, 12, 20, 13, 39, 24, 16, 20, 21, 13, 10, 17, 26, 23, 16, 21, 27, 21, 41, 44, 41, 43, 40, 32, 39, 40, 38, 43, 50, 52, 57, 66, 69, 61, 53, 45, 48, 49, 36, 34, 37, 20, 13, 12, 13, 15, 16, 15, 14, 15, 18, 19, 19, 17, 15, 13, 12, 15, 16, 15, 15, 16, 16, 16, 15, 15, 15, 16, 17, 16, 17, 18, 16, 15, 15, 16, 17, 14, 14, 17, 20, 20, 17, 15, 17, 17, 16, 14, 16, 16, 16, 23, 20, 19, 25, 21, 15, 16, 25, 20, 13, 10, 22, 20, 17, 19, 20, 14, 12, 17, 21, 18, 19, 21, 20, 18, 18, 19, 20, 22, 23, 25, 28, 26, 21, 31, 30, 28, 24, 33, 59, 41, 38, 46, 54, 58, 62, 69, 66, 59, 65, 76, 62, 80, 74, 75, 69, 88, 84, 76, 66, 68, 80, 64, 65, 48, 54, 33, 48, 51, 33, 59, 67, 38, 68, 45, 54, 69, 86, 85, 55, 74, 80, 73, 52, 29, 32, 38, 39, 39, 35, 34, 36, 34, 35, 41, 39, 37, 40, 40, 39, 36, 33, 33, 59, 41, 64, 58, 74, 58, 54, 55, 64, 69, 59, 43, 85, 50, 46, 45, 60, 60, 72, 66, 52, 63, 69, 62, 52, 64, 49, 52, 53, 69, 51, 73, 55, 43, 47, 54, 51, 46, 44, 42, 33, 17, 15, 22, 18, 17, 28, 22, 25, 27, 27, 28, 35, 40, 44, 44, 45, 45, 42, 37, 34, 31, 27, 35, 43, 13, 10, 20, 13, 35, 12, 16, 20, 18, 15, 21, 28, 24, 12, 16, 25, 21, 39, 30, 30, 44, 43, 33, 45, 43, 37, 40, 46, 48, 52, 60, 65, 57, 47, 39, 49, 51, 36, 34, 34, 12, 12, 12, 13, 14, 15, 16, 16, 16, 17, 15, 16, 19, 19, 17, 16, 15, 15, 13, 14, 15, 16, 17, 16, 13, 14, 17, 17, 17, 17, 16, 14, 13, 15, 18, 18, 14, 14, 17, 18, 20, 24, 20, 14, 14, 16, 14, 13, 15, 17, 21, 21, 21, 24, 20, 17, 19, 22, 19, 16, 20, 19, 17, 19, 19, 17, 16, 17, 18, 20, 18, 16, 18, 21, 23, 22, 23, 21, 22, 23, 22, 23, 27, 33, 37, 40, 34, 32, 63, 62, 41, 46, 64, 59, 58, 70, 66, 62, 62, 70, 67, 72, 83, 79, 75, 78, 79, 74, 61, 68, 74, 70, 54, 49, 53, 38, 48, 44, 43, 57, 55, 44, 61, 54, 61, 82, 93, 72, 42, 72, 72, 79, 59, 27, 37, 28, 29, 32, 34, 34, 32, 33, 36, 35, 34, 34, 36, 38, 39, 36, 32, 37, 42, 58, 66, 63, 77, 55, 49, 44, 70, 60, 45, 50, 86, 48, 40, 40, 67, 43, 66, 69, 53, 68, 63, 60, 49, 65, 52, 47, 52, 61, 49, 64, 55, 45, 52, 56, 49, 46, 40, 39, 31, 8, 11, 19, 22, 17, 28, 28, 23, 25, 30, 31, 33, 37, 41, 47, 47, 42, 40, 38, 35, 35, 34, 30, 25, 16, 19, 13, 10, 30, 19, 9, 30, 17, 16, 19, 26, 25, 14, 14, 23, 26, 31, 36, 40, 46, 38, 35, 38, 41, 42, 41, 42, 48, 53, 54, 57, 52, 45, 42, 44, 43, 36, 34, 31, 9, 13, 13, 13, 14, 15, 15, 16, 17, 17, 15, 16, 21, 21, 17, 17, 16, 15, 13, 14, 15, 15, 17, 16, 12, 13, 17, 17, 16, 16, 15, 13, 13, 15, 18, 18, 14, 14, 17, 17, 20, 25, 21, 14, 13, 16, 13, 13, 15, 17, 22, 22, 22, 23, 21, 18, 20, 22, 18, 17, 19, 18, 17, 18, 20, 18, 15, 15, 16, 18, 17, 16, 19, 23, 25, 25, 25, 22, 23, 24, 21, 23, 29, 35, 37, 40, 39, 37, 59, 53, 42, 46, 62, 61, 58, 67, 64, 64, 66, 75, 74, 68, 76, 74, 78, 76, 73, 71, 66, 73, 72, 61, 48, 57, 57, 34, 47, 53, 47, 56, 48, 38, 57, 61, 60, 97, 89, 74, 31, 73, 64, 79, 62, 28, 36, 25, 27, 30, 32, 34, 33, 35, 39, 35, 33, 33, 36, 39, 42, 41, 37, 31, 37, 67, 57, 68, 70, 48, 42, 41, 70, 55, 43, 56, 84, 49, 40, 42, 62, 49, 57, 72, 61, 68, 59, 62, 51, 60, 53, 52, 53, 55, 43, 58, 55, 51, 57, 53, 45, 43, 40, 46, 34, 13, 10, 13, 19, 23, 17, 27, 31, 24, 26, 32, 34, 34, 37, 40, 48, 47, 41, 39, 39, 38, 40, 37, 27, 19, 20, 23, 14, 26, 18, 8, 33, 23, 20, 16, 22, 25, 17, 18, 27, 32, 31, 36, 40, 45, 38, 37, 38, 37, 41, 39, 40, 47, 52, 50, 48, 45, 41, 41, 43, 42, 40, 37, 31, 12, 13, 13, 14, 14, 14, 15, 15, 17, 18, 16, 17, 22, 22, 18, 16, 18, 17, 15, 15, 15, 16, 17, 16, 12, 13, 16, 16, 16, 16, 15, 13, 12, 14, 17, 17, 13, 13, 16, 16, 18, 23, 21, 15, 14, 15, 13, 13, 15, 18, 22, 22, 22, 24, 21, 18, 20, 22, 19, 17, 19, 18, 16, 18, 20, 18, 14, 13, 15, 16, 17, 18, 20, 23, 27, 29, 27, 24, 24, 25, 22, 23, 29, 33, 34, 38, 46, 51, 61, 44, 48, 49, 57, 61, 55, 57, 61, 68, 74, 83, 80, 69, 69, 70, 76, 74, 66, 67, 72, 77, 65, 48, 42, 61, 61, 36, 51, 58, 43, 53, 45, 34, 58, 63, 64, 109, 83, 73, 46, 66, 61, 75, 65, 32, 33, 26, 30, 30, 31, 34, 34, 38, 42, 39, 35, 35, 38, 42, 45, 44, 41, 26, 48, 67, 53, 71, 60, 41, 39, 41, 66, 53, 48, 63, 79, 48, 40, 43, 50, 60, 45, 68, 66, 67, 56, 61, 51, 56, 53, 56, 55, 52, 37, 54, 56, 56, 56, 48, 41, 40, 39, 50, 39, 15, 16, 20, 23, 17, 27, 34, 27, 28, 34, 36, 36, 38, 41, 47, 47, 41, 39, 39, 38, 40, 36, 26, 19, 22, 25, 18, 21, 12, 7, 29, 27, 24, 14, 20, 25, 19, 22, 31, 35, 32, 32, 35, 39, 38, 36, 38, 34, 39, 40, 40, 45, 50, 50, 46, 42, 40, 40, 41, 40, 41, 39, 28, 13, 13, 13, 14, 14, 14, 15, 15, 17, 18, 16, 17, 23, 22, 18, 16, 18, 19, 16, 15, 16, 16, 18, 17, 12, 13, 17, 16, 15, 15, 15, 13, 11, 13, 15, 17, 13, 13, 15, 15, 16, 21, 21, 16, 14, 15, 13, 13, 15, 17, 22, 22, 22, 24, 21, 17, 19, 23, 19, 16, 18, 18, 18, 18, 19, 18, 16, 16, 16, 15, 17, 20, 21, 23, 26, 30, 28, 25, 25, 25, 22, 23, 28, 29, 31, 37, 53, 65, 70, 46, 57, 55, 54, 59, 50, 47, 60, 73, 78, 84, 80, 71, 69, 68, 70, 66, 60, 64, 72, 74, 53, 41, 38, 54, 65, 46, 57, 52, 36, 48, 44, 37, 59, 55, 76, 113, 75, 76, 61, 66, 57, 71, 65, 36, 29, 29, 34, 31, 31, 33, 34, 38, 43, 41, 39, 40, 42, 44, 46, 44, 40, 27, 65, 60, 61, 69, 52, 36, 42, 41, 62, 55, 54, 69, 71, 46, 40, 42, 37, 64, 35, 59, 66, 68, 55, 56, 46, 54, 51, 55, 56, 53, 36, 53, 57, 57, 52, 44, 42, 39, 35, 47, 42, 20, 19, 19, 22, 17, 27, 35, 30, 30, 34, 37, 38, 39, 41, 47, 46, 41, 40, 39, 36, 32, 31, 25, 21, 23, 23, 21, 18, 9, 8, 22, 28, 27, 15, 22, 26, 21, 23, 30, 31, 31, 25, 30, 35, 38, 35, 37, 32, 39, 41, 41, 44, 49, 50, 48, 44, 41, 39, 38, 37, 38, 36, 22, 15, 14, 14, 14, 14, 14, 14, 14, 16, 17, 15, 17, 23, 22, 18, 15, 19, 20, 18, 15, 16, 17, 19, 18, 13, 14, 17, 17, 15, 16, 16, 14, 12, 13, 15, 16, 13, 13, 16, 14, 14, 18, 20, 18, 16, 14, 14, 14, 15, 16, 21, 21, 21, 23, 20, 17, 20, 23, 20, 16, 18, 19, 19, 18, 16, 18, 22, 22, 20, 16, 17, 21, 21, 21, 24, 28, 26, 24, 24, 24, 21, 22, 27, 26, 31, 38, 52, 64, 74, 50, 58, 59, 52, 56, 48, 45, 62, 72, 74, 75, 73, 70, 69, 68, 59, 55, 61, 64, 67, 63, 44, 43, 40, 45, 66, 57, 58, 44, 34, 46, 45, 45, 57, 37, 93, 103, 64, 87, 52, 79, 51, 66, 61, 36, 25, 33, 38, 34, 32, 33, 31, 35, 42, 42, 43, 44, 45, 44, 44, 39, 34, 38, 68, 50, 73, 60, 43, 36, 51, 41, 57, 59, 58, 70, 59, 46, 42, 43, 32, 61, 35, 48, 61, 68, 54, 50, 39, 55, 49, 47, 53, 53, 36, 52, 55, 54, 49, 44, 46, 42, 30, 40, 42, 22, 20, 18, 21, 17, 27, 37, 32, 31, 34, 38, 38, 38, 41, 46, 45, 42, 41, 39, 32, 20, 24, 23, 22, 23, 19, 24, 20, 13, 13, 17, 27, 29, 19, 26, 28, 21, 20, 24, 22, 30, 21, 28, 33, 40, 34, 36, 30, 37, 41, 41, 41, 45, 47, 46, 43, 40, 38, 37, 35, 36, 31, 19, 19, 16, 15, 14, 14, 13, 13, 12, 14, 15, 14, 15, 22, 21, 17, 14, 20, 21, 17, 15, 17, 19, 20, 19, 15, 15, 18, 18, 16, 17, 18, 16, 13, 13, 15, 16, 13, 14, 16, 14, 14, 17, 20, 19, 17, 13, 14, 14, 14, 14, 19, 19, 19, 21, 18, 15, 19, 23, 20, 15, 17, 19, 21, 19, 13, 19, 29, 31, 25, 18, 19, 22, 21, 19, 20, 23, 24, 22, 22, 22, 19, 20, 26, 27, 34, 37, 39, 43, 59, 46, 50, 54, 49, 55, 50, 52, 65, 63, 65, 62, 61, 62, 62, 68, 49, 47, 69, 68, 58, 49, 42, 44, 45, 47, 67, 57, 55, 47, 43, 45, 43, 51, 53, 23, 105, 90, 75, 64, 68, 60, 56, 59, 52, 36, 21, 36, 38, 35, 35, 32, 27, 31, 39, 40, 42, 43, 43, 42, 40, 35, 29, 56, 39, 51, 75, 49, 35, 43, 58, 38, 51, 62, 59, 68, 46, 51, 49, 46, 37, 52, 47, 43, 58, 64, 51, 48, 39, 54, 44, 40, 47, 48, 32, 48, 51, 54, 50, 45, 47, 42, 27, 34, 39, 21, 20, 17, 20, 17, 28, 37, 33, 31, 33, 37, 38, 36, 40, 45, 44, 42, 43, 40, 30, 13, 18, 17, 19, 24, 18, 30, 26, 23, 20, 13, 23, 30, 22, 28, 29, 20, 17, 18, 14, 29, 19, 30, 35, 43, 33, 35, 28, 34, 39, 40, 38, 39, 40, 38, 36, 36, 38, 39, 39, 37, 28, 20, 27, 17, 16, 15, 14, 12, 12, 11, 14, 14, 13, 15, 22, 22, 16, 14, 19, 19, 15, 14, 17, 20, 21, 20, 15, 15, 17, 17, 17, 18, 19, 16, 14, 14, 15, 17, 14, 14, 16, 14, 13, 16, 20, 21, 18, 13, 13, 15, 13, 13, 18, 18, 18, 20, 17, 14, 19, 24, 20, 15, 17, 19, 21, 18, 12, 20, 32, 35, 29, 21, 20, 22, 21, 19, 18, 19, 20, 18, 19, 20, 18, 19, 25, 28, 33, 35, 30, 27, 50, 48, 50, 51, 46, 50, 50, 55, 62, 59, 64, 61, 59, 59, 54, 65, 46, 48, 78, 69, 52, 40, 34, 29, 45, 61, 74, 55, 62, 44, 48, 40, 37, 51, 58, 49, 108, 87, 91, 48, 71, 49, 63, 53, 45, 40, 22, 33, 35, 34, 35, 31, 26, 28, 36, 38, 38, 38, 39, 39, 39, 35, 30, 70, 8, 71, 66, 48, 38, 57, 55, 37, 46, 60, 58, 70, 34, 51, 50, 46, 40, 37, 53, 43, 62, 58, 44, 51, 43, 49, 39, 39, 41, 40, 25, 42, 46, 52, 50, 39, 36, 34, 25, 32, 35, 20, 20, 16, 20, 18, 26, 37, 34, 31, 32, 37, 37, 34, 40, 44, 44, 43, 44, 40, 33, 16, 17, 11, 14, 26, 24, 34, 26, 24, 20, 9, 15, 25, 21, 27, 27, 19, 18, 19, 15, 26, 13, 28, 29, 38, 24, 29, 31, 33, 41, 45, 43, 40, 41, 42, 40, 39, 40, 40, 39, 34, 23, 21, 29, 17, 17, 15, 14, 12, 11, 11, 14, 15, 14, 16, 22, 23, 17, 13, 18, 18, 13, 12, 18, 20, 20, 19, 13, 13, 16, 15, 16, 17, 18, 16, 14, 13, 14, 17, 15, 15, 17, 15, 13, 15, 20, 23, 19, 12, 13, 15, 14, 13, 18, 18, 18, 20, 17, 14, 18, 24, 21, 15, 16, 20, 19, 16, 14, 20, 29, 31, 29, 23, 22, 22, 22, 21, 19, 17, 18, 17, 17, 19, 17, 19, 26, 26, 28, 34, 31, 23, 47, 52, 55, 48, 43, 44, 49, 52, 56, 59, 65, 61, 60, 61, 52, 63, 48, 56, 79, 62, 48, 38, 28, 24, 48, 64, 76, 56, 65, 33, 47, 37, 34, 45, 62, 90, 101, 82, 87, 41, 74, 47, 62, 51, 46, 51, 27, 32, 31, 32, 33, 31, 27, 30, 36, 37, 35, 34, 37, 38, 40, 37, 33, 64, 18, 77, 58, 46, 49, 56, 43, 43, 48, 55, 60, 80, 30, 50, 47, 43, 40, 28, 53, 45, 63, 58, 45, 53, 45, 47, 38, 40, 42, 42, 27, 43, 43, 49, 49, 37, 30, 31, 28, 33, 33, 21, 22, 17, 20, 17, 25, 37, 35, 32, 32, 37, 37, 33, 40, 44, 43, 43, 45, 41, 36, 21, 19, 12, 14, 28, 26, 34, 25, 20, 18, 12, 13, 21, 21, 27, 27, 20, 21, 24, 20, 26, 13, 10, 25, 23, 32, 17, 26, 29, 30, 39, 49, 48, 42, 42, 45, 43, 41, 40, 39, 36, 29, 21, 22, 27, 17, 17, 16, 14, 12, 11, 11, 15, 16, 15, 17, 23, 24, 18, 13, 17, 17, 11, 11, 18, 19, 18, 17, 12, 11, 14, 13, 14, 16, 17, 16, 13, 12, 12, 18, 16, 16, 18, 15, 13, 15, 20, 24, 19, 12, 13, 15, 14, 14, 18, 19, 18, 20, 18, 14, 18, 25, 21, 14, 16, 20, 17, 14, 16, 20, 23, 26, 28, 25, 22, 21, 22, 23, 20, 16, 17, 16, 17, 19, 17, 20, 27, 26, 23, 32, 34, 22, 43, 50, 55, 41, 39, 40, 52, 53, 52, 58, 63, 57, 57, 61, 54, 61, 50, 64, 77, 53, 46, 38, 28, 34, 55, 57, 71, 56, 59, 23, 46, 37, 35, 35, 56, 121, 88, 71, 70, 38, 78, 46, 53, 52, 52, 65, 34, 31, 29, 31, 31, 31, 30, 33, 37, 36, 34, 33, 36, 38, 40, 38, 34, 46, 52, 68, 53, 37, 59, 44, 31, 50, 52, 51, 64, 92, 32, 51, 47, 44, 41, 25, 52, 47, 61, 62, 49, 52, 42, 49, 40, 40, 46, 50, 38, 49, 43, 48, 52, 42, 33, 37, 36, 38, 34, 23, 25, 18, 20, 17, 23, 38, 37, 33, 32, 38, 38, 33, 41, 43, 43, 43, 45, 41, 37, 23, 22, 16, 18, 29, 23, 33, 27, 19, 18, 20, 17, 23, 24, 29, 28, 22, 24, 28, 25, 30, 13, 27, 21, 30, 17, 29, 23, 23, 33, 46, 47, 41, 38, 38, 36, 36, 36, 36, 33, 28, 25, 26, 26, 16, 17, 17, 15, 13, 11, 11, 14, 16, 16, 17, 22, 23, 17, 12, 17, 15, 13, 10, 12, 18, 18, 16, 14, 13, 13, 13, 12, 15, 16, 17, 15, 13, 13, 13, 17, 16, 16, 18, 16, 14, 13, 18, 21, 19, 15, 15, 16, 14, 14, 18, 19, 20, 21, 18, 15, 17, 22, 20, 15, 14, 19, 15, 13, 18, 19, 19, 22, 28, 28, 25, 21, 22, 23, 21, 15, 20, 17, 17, 17, 16, 19, 27, 25, 21, 31, 37, 26, 38, 46, 50, 35, 35, 38, 53, 56, 53, 56, 54, 52, 56, 57, 50, 54, 54, 65, 63, 47, 42, 32, 30, 50, 55, 49, 64, 55, 43, 28, 42, 44, 33, 34, 52, 129, 72, 67, 48, 37, 74, 50, 51, 55, 60, 72, 33, 30, 32, 32, 30, 32, 31, 34, 39, 39, 37, 39, 40, 42, 45, 39, 34, 45, 71, 50, 50, 32, 49, 32, 27, 49, 49, 51, 63, 95, 34, 50, 44, 42, 46, 30, 48, 49, 57, 62, 50, 49, 41, 48, 46, 42, 43, 48, 42, 47, 41, 46, 53, 44, 33, 40, 42, 40, 31, 21, 24, 18, 21, 17, 22, 37, 36, 31, 33, 40, 38, 33, 39, 43, 43, 41, 44, 42, 37, 28, 31, 23, 24, 35, 27, 34, 32, 25, 25, 27, 25, 30, 29, 32, 33, 30, 31, 34, 33, 35, 23, 20, 19, 30, 20, 34, 25, 21, 30, 43, 44, 37, 33, 28, 31, 31, 31, 33, 31, 27, 27, 30, 29, 13, 17, 19, 17, 14, 12, 12, 12, 17, 17, 16, 19, 20, 16, 12, 18, 14, 13, 10, 14, 18, 17, 13, 11, 16, 17, 12, 13, 17, 17, 16, 16, 15, 15, 16, 15, 15, 15, 16, 16, 14, 11, 15, 17, 18, 18, 17, 15, 15, 15, 17, 19, 20, 20, 18, 17, 16, 17, 18, 16, 13, 17, 13, 13, 18, 18, 16, 21, 29, 31, 27, 22, 22, 22, 19, 14, 22, 20, 18, 16, 13, 18, 27, 24, 22, 30, 37, 33, 36, 46, 42, 32, 34, 39, 52, 58, 56, 54, 45, 50, 55, 48, 41, 44, 58, 58, 46, 47, 38, 24, 32, 58, 48, 49, 60, 52, 29, 39, 35, 49, 30, 44, 59, 112, 55, 66, 32, 40, 67, 59, 58, 57, 66, 69, 28, 29, 35, 35, 30, 32, 30, 33, 40, 44, 43, 48, 46, 49, 50, 39, 34, 67, 61, 34, 48, 37, 29, 29, 35, 43, 42, 54, 59, 85, 31, 47, 40, 37, 51, 37, 41, 48, 53, 57, 46, 46, 42, 45, 52, 45, 38, 40, 44, 44, 45, 51, 57, 42, 29, 40, 45, 40, 30, 18, 21, 18, 21, 16, 21, 33, 34, 28, 35, 43, 37, 34, 37, 42, 42, 40, 42, 43, 39, 37, 44, 33, 31, 45, 38, 39, 39, 35, 34, 32, 32, 39, 34, 35, 40, 41, 40, 41, 44, 36, 33, 13, 10, 20, 31, 23, 37, 36, 28, 32, 40, 40, 35, 32, 27, 32, 30, 29, 33, 31, 25, 26, 31, 33, 14, 16, 18, 16, 13, 12, 12, 12, 17, 18, 17, 19, 20, 16, 15, 21, 17, 13, 16, 19, 18, 13, 11, 15, 16, 13, 13, 16, 17, 16, 15, 15, 15, 15, 16, 16, 16, 17, 16, 14, 12, 14, 19, 20, 14, 13, 10, 13, 18, 16, 17, 18, 20, 20, 19, 17, 15, 14, 16, 16, 13, 16, 13, 13, 18, 18, 15, 19, 27, 27, 26, 24, 24, 23, 19, 14, 18, 18, 19, 19, 15, 17, 25, 29, 24, 29, 33, 30, 34, 43, 35, 30, 38, 47, 58, 59, 53, 55, 48, 46, 46, 44, 44, 47, 54, 54, 51, 49, 37, 31, 39, 53, 46, 55, 59, 46, 34, 29, 36, 39, 35, 51, 78, 75, 47, 47, 27, 48, 73, 61, 55, 53, 59, 59, 35, 30, 32, 32, 31, 34, 32, 35, 41, 43, 44, 49, 48, 48, 44, 34, 39, 80, 46, 28, 52, 48, 38, 37, 46, 52, 47, 54, 56, 76, 28, 44, 45, 40, 48, 38, 41, 44, 52, 53, 47, 42, 41, 51, 55, 48, 49, 58, 65, 68, 70, 73, 71, 51, 43, 55, 56, 50, 49, 22, 19, 21, 23, 14, 22, 33, 34, 28, 35, 42, 36, 34, 38, 44, 44, 42, 43, 43, 42, 44, 50, 41, 40, 48, 41, 42, 41, 39, 37, 36, 37, 43, 37, 37, 42, 42, 41, 42, 43, 31, 37, 26, 34, 37, 22, 31, 42, 33, 31, 35, 35, 37, 41, 38, 29, 23, 28, 35, 29, 23, 24, 29, 33, 15, 17, 17, 15, 12, 13, 13, 13, 18, 19, 17, 19, 19, 15, 15, 19, 16, 12, 14, 15, 16, 13, 11, 14, 16, 13, 13, 15, 15, 15, 15, 14, 14, 14, 16, 18, 19, 18, 17, 14, 12, 13, 21, 22, 11, 5, 11, 20, 19, 18, 18, 19, 19, 20, 18, 14, 12, 16, 17, 16, 16, 14, 14, 18, 17, 14, 17, 24, 24, 25, 27, 26, 22, 18, 15, 14, 17, 21, 22, 18, 17, 22, 29, 22, 24, 28, 26, 32, 38, 26, 23, 35, 46, 57, 56, 47, 49, 47, 39, 36, 43, 51, 49, 48, 47, 48, 44, 32, 35, 43, 45, 42, 58, 55, 38, 38, 27, 34, 30, 37, 40, 81, 43, 52, 51, 40, 43, 46, 41, 46, 54, 57, 51, 48, 33, 28, 29, 31, 35, 35, 37, 42, 43, 46, 48, 43, 40, 37, 39, 63, 39, 62, 65, 61, 34, 35, 50, 41, 49, 48, 57, 66, 84, 44, 34, 46, 39, 43, 36, 37, 41, 51, 41, 42, 41, 45, 55, 55, 50, 52, 55, 51, 44, 43, 44, 42, 38, 62, 102, 121, 128, 72, 27, 18, 22, 24, 14, 24, 33, 35, 28, 35, 41, 35, 33, 39, 46, 47, 44, 44, 42, 41, 40, 44, 41, 39, 40, 33, 36, 34, 33, 34, 33, 32, 38, 34, 34, 36, 35, 34, 33, 33, 42, 51, 50, 56, 51, 36, 42, 41, 37, 39, 46, 52, 62, 69, 61, 45, 38, 41, 45, 44, 44, 44, 46, 51, 16, 17, 16, 13, 11, 13, 14, 15, 20, 19, 17, 18, 18, 15, 15, 18, 16, 13, 12, 13, 14, 13, 11, 12, 14, 14, 14, 14, 15, 15, 15, 14, 13, 13, 17, 19, 20, 19, 16, 14, 13, 11, 20, 22, 13, 7, 12, 21, 20, 19, 17, 17, 19, 21, 20, 14, 11, 15, 19, 18, 17, 15, 15, 18, 16, 13, 15, 21, 22, 25, 28, 25, 20, 17, 18, 13, 16, 21, 23, 19, 17, 23, 21, 16, 19, 24, 25, 30, 35, 24, 19, 29, 40, 53, 53, 43, 45, 45, 34, 30, 41, 50, 45, 46, 45, 43, 39, 31, 36, 40, 39, 38, 53, 48, 31, 36, 31, 29, 30, 38, 29, 72, 44, 35, 40, 37, 35, 40, 46, 52, 55, 58, 47, 57, 31, 23, 25, 30, 35, 36, 38, 42, 42, 42, 42, 39, 41, 38, 40, 66, 35, 71, 65, 56, 37, 41, 40, 48, 55, 57, 60, 65, 73, 40, 27, 42, 41, 46, 35, 36, 45, 48, 27, 35, 42, 48, 51, 43, 40, 45, 49, 43, 36, 37, 42, 39, 34, 55, 85, 94, 98, 68, 30, 19, 20, 24, 16, 23, 33, 35, 29, 34, 40, 34, 33, 39, 47, 48, 45, 44, 41, 39, 35, 36, 38, 37, 33, 25, 30, 30, 32, 35, 33, 29, 31, 35, 35, 34, 31, 30, 30, 32, 44, 48, 47, 50, 47, 41, 47, 44, 44, 46, 46, 46, 50, 55, 56, 48, 45, 41, 38, 46, 52, 48, 47, 49, 16, 16, 15, 13, 11, 12, 14, 17, 21, 19, 17, 18, 18, 16, 18, 19, 19, 16, 13, 13, 14, 14, 12, 12, 14, 15, 15, 14, 14, 15, 15, 14, 13, 12, 16, 19, 20, 19, 16, 14, 14, 9, 17, 21, 18, 14, 15, 20, 21, 19, 17, 16, 18, 21, 20, 16, 12, 17, 21, 19, 17, 16, 16, 17, 15, 13, 14, 19, 21, 24, 26, 22, 16, 17, 21, 14, 16, 20, 22, 18, 18, 24, 17, 14, 18, 24, 25, 27, 30, 27, 23, 30, 39, 49, 49, 41, 43, 42, 30, 26, 36, 41, 39, 49, 48, 36, 35, 33, 36, 35, 36, 37, 44, 43, 30, 31, 29, 26, 33, 36, 35, 66, 51, 24, 29, 30, 37, 52, 55, 49, 51, 54, 44, 57, 28, 20, 23, 28, 34, 35, 38, 42, 41, 37, 38, 40, 47, 43, 34, 48, 59, 59, 46, 44, 40, 44, 40, 45, 53, 61, 62, 63, 64, 37, 26, 41, 49, 58, 39, 41, 51, 43, 22, 33, 39, 43, 43, 35, 35, 42, 46, 40, 35, 39, 35, 30, 25, 38, 53, 52, 53, 51, 30, 22, 17, 24, 20, 22, 31, 35, 30, 34, 39, 34, 34, 39, 46, 48, 45, 43, 40, 39, 36, 34, 37, 39, 33, 26, 31, 33, 38, 44, 39, 32, 30, 39, 39, 35, 33, 34, 37, 39, 44, 39, 39, 41, 42, 45, 49, 44, 47, 47, 44, 41, 43, 46, 45, 43, 46, 42, 36, 46, 52, 43, 38, 36, 15, 16, 15, 13, 11, 11, 14, 18, 21, 19, 15, 18, 19, 18, 19, 19, 21, 18, 15, 14, 15, 15, 13, 12, 15, 18, 17, 14, 14, 15, 15, 15, 13, 12, 14, 18, 20, 18, 15, 14, 15, 8, 14, 19, 21, 20, 18, 18, 21, 19, 16, 16, 17, 19, 20, 17, 15, 19, 22, 19, 17, 16, 17, 17, 15, 13, 14, 17, 20, 23, 24, 19, 14, 16, 23, 16, 17, 20, 20, 17, 18, 25, 17, 17, 22, 27, 28, 25, 25, 28, 28, 36, 40, 43, 41, 33, 37, 35, 27, 27, 34, 35, 34, 48, 47, 29, 30, 33, 32, 30, 34, 35, 36, 40, 30, 25, 23, 26, 33, 29, 47, 57, 39, 24, 32, 32, 42, 58, 50, 38, 41, 44, 39, 48, 24, 19, 22, 26, 32, 34, 38, 42, 41, 38, 40, 43, 48, 45, 34, 39, 65, 52, 39, 37, 36, 45, 46, 39, 47, 64, 66, 64, 63, 41, 28, 41, 55, 67, 43, 44, 52, 38, 26, 35, 33, 32, 36, 35, 38, 42, 43, 35, 29, 33, 28, 27, 24, 28, 31, 24, 24, 34, 28, 25, 14, 23, 23, 20, 30, 35, 29, 33, 38, 34, 35, 38, 45, 47, 44, 43, 40, 39, 35, 31, 34, 37, 35, 29, 34, 35, 42, 49, 44, 35, 31, 37, 37, 33, 32, 36, 41, 44, 42, 31, 36, 39, 40, 47, 48, 40, 44, 43, 41, 43, 49, 50, 39, 39, 45, 48, 45, 49, 50, 40, 34, 30, 14, 15, 16, 13, 11, 13, 10, 12, 19, 21, 17, 14, 18, 21, 20, 17, 16, 20, 19, 14, 13, 14, 16, 15, 12, 15, 20, 19, 15, 15, 16, 17, 16, 14, 12, 12, 17, 20, 18, 14, 15, 16, 9, 12, 17, 22, 22, 19, 17, 20, 18, 16, 15, 16, 18, 19, 18, 18, 21, 22, 17, 16, 17, 18, 17, 15, 13, 14, 17, 19, 21, 21, 16, 13, 16, 22, 17, 17, 20, 20, 16, 18, 24, 21, 22, 26, 30, 31, 25, 22, 27, 31, 41, 38, 36, 30, 23, 26, 26, 25, 27, 32, 33, 31, 41, 38, 22, 25, 28, 26, 28, 32, 32, 30, 38, 29, 21, 17, 28, 30, 21, 54, 44, 14, 25, 39, 36, 45, 49, 35, 31, 32, 31, 35, 37, 24, 21, 23, 24, 31, 33, 38, 43, 43, 44, 48, 45, 42, 45, 42, 46, 48, 53, 42, 38, 36, 45, 41, 42, 47, 69, 69, 62, 60, 42, 30, 43, 57, 70, 45, 44, 48, 35, 34, 37, 29, 24, 31, 38, 40, 41, 40, 32, 25, 27, 22, 28, 28, 25, 26, 21, 20, 26, 25, 26, 15, 22, 22, 20, 28, 34, 29, 33, 38, 35, 37, 38, 45, 46, 43, 43, 42, 39, 32, 27, 28, 33, 37, 33, 34, 33, 40, 47, 43, 34, 31, 32, 30, 28, 30, 35, 39, 40, 36, 26, 37, 38, 36, 45, 41, 37, 39, 37, 35, 42, 51, 51, 39, 38, 42, 51, 55, 53, 51, 48, 43, 38, 13, 15, 16, 14, 11, 13, 10, 12, 20, 21, 16, 12, 18, 22, 21, 15, 14, 18, 19, 14, 12, 14, 17, 16, 12, 16, 21, 20, 15, 15, 17, 18, 17, 15, 12, 13, 10, 15, 19, 17, 14, 15, 18, 13, 10, 12, 16, 19, 20, 18, 16, 18, 17, 15, 15, 15, 16, 17, 18, 19, 22, 20, 14, 15, 18, 18, 17, 16, 14, 16, 17, 17, 18, 18, 16, 14, 15, 19, 18, 18, 21, 21, 16, 16, 23, 23, 23, 27, 31, 33, 27, 22, 30, 35, 42, 33, 27, 25, 20, 20, 19, 24, 25, 26, 30, 29, 31, 26, 17, 21, 20, 20, 27, 26, 26, 26, 35, 25, 18, 11, 27, 23, 19, 49, 34, 5, 19, 31, 28, 42, 39, 26, 40, 31, 23, 35, 29, 27, 25, 23, 24, 31, 33, 38, 45, 46, 46, 54, 48, 38, 43, 47, 52, 36, 48, 37, 42, 45, 44, 22, 55, 54, 75, 68, 52, 48, 32, 33, 48, 57, 67, 46, 41, 40, 37, 38, 32, 32, 27, 29, 35, 35, 38, 41, 37, 33, 36, 15, 20, 22, 19, 27, 30, 31, 29, 23, 26, 18, 22, 19, 22, 26, 33, 29, 33, 38, 36, 38, 40, 45, 45, 43, 44, 45, 41, 32, 27, 24, 32, 43, 41, 37, 32, 37, 42, 40, 36, 36, 31, 29, 29, 32, 34, 33, 30, 29, 21, 38, 34, 25, 35, 31, 36, 37, 33, 29, 33, 37, 36, 38, 39, 39, 43, 51, 53, 56, 63, 63, 60, 11, 15, 17, 15, 11, 13, 10, 11, 21, 21, 15, 11, 17, 24, 24, 18, 16, 21, 23, 16, 14, 16, 18, 17, 12, 16, 23, 22, 16, 16, 18, 19, 18, 15, 13, 8, 13, 18, 17, 14, 14, 18, 11, 13, 15, 16, 16, 16, 17, 18, 16, 15, 15, 15, 15, 16, 18, 20, 23, 19, 12, 12, 17, 18, 17, 16, 15, 16, 18, 16, 16, 17, 16, 15, 15, 16, 17, 18, 22, 22, 17, 16, 20, 20, 21, 24, 30, 34, 30, 26, 38, 40, 41, 29, 24, 28, 26, 26, 23, 26, 20, 14, 21, 27, 26, 18, 19, 23, 17, 20, 28, 18, 19, 24, 32, 19, 15, 5, 20, 19, 26, 43, 39, 27, 30, 19, 5, 34, 35, 15, 38, 36, 22, 38, 26, 33, 28, 23, 25, 31, 33, 39, 46, 49, 40, 52, 57, 46, 44, 40, 34, 39, 27, 38, 45, 33, 27, 27, 45, 43, 67, 61, 45, 46, 34, 37, 56, 58, 63, 48, 41, 34, 41, 34, 22, 37, 37, 27, 30, 30, 33, 38, 35, 29, 29, 23, 32, 27, 16, 23, 25, 22, 36, 21, 24, 23, 23, 15, 23, 25, 32, 28, 33, 38, 36, 39, 40, 46, 46, 44, 46, 47, 46, 41, 36, 31, 39, 56, 56, 47, 38, 41, 46, 45, 45, 48, 42, 40, 41, 43, 41, 34, 25, 38, 30, 48, 38, 23, 37, 36, 28, 35, 38, 40, 46, 46, 39, 42, 52, 46, 38, 47, 58, 72, 91, 94, 94, 11, 13, 13, 11, 9, 8, 8, 9, 14, 18, 19, 20, 22, 21, 18, 18, 18, 15, 14, 15, 17, 18, 16, 13, 16, 22, 21, 16, 16, 19, 20, 19, 16, 13, 8, 13, 17, 17, 15, 16, 19, 15, 12, 12, 15, 18, 17, 14, 17, 19, 15, 13, 16, 17, 16, 17, 20, 23, 19, 13, 14, 19, 19, 17, 16, 15, 16, 18, 16, 17, 18, 18, 15, 15, 16, 13, 10, 14, 19, 21, 18, 14, 12, 18, 25, 24, 30, 35, 28, 27, 33, 29, 29, 29, 31, 33, 31, 29, 27, 27, 25, 24, 25, 28, 25, 19, 29, 29, 17, 29, 29, 20, 18, 21, 33, 16, 25, 8, 15, 21, 30, 34, 32, 18, 34, 39, 44, 50, 46, 39, 41, 44, 47, 45, 42, 46, 18, 33, 29, 32, 27, 31, 42, 43, 43, 46, 46, 41, 39, 40, 42, 41, 41, 39, 33, 31, 32, 30, 46, 41, 39, 31, 27, 31, 34, 39, 52, 60, 56, 41, 37, 39, 39, 40, 38, 38, 32, 25, 22, 25, 28, 27, 21, 19, 21, 18, 25, 29, 27, 38, 27, 24, 33, 23, 19, 22, 24, 22, 24, 28, 27, 27, 33, 38, 37, 36, 38, 42, 49, 48, 39, 35, 35, 39, 50, 53, 55, 57, 45, 42, 44, 42, 40, 39, 40, 42, 44, 46, 43, 37, 34, 33, 30, 33, 31, 33, 28, 24, 27, 28, 23, 23, 29, 39, 45, 40, 32, 35, 40, 37, 43, 56, 47, 57, 93, 93, 80, 11, 12, 12, 11, 8, 8, 8, 8, 14, 18, 20, 19, 19, 18, 16, 17, 15, 13, 12, 13, 16, 18, 16, 13, 17, 22, 21, 16, 16, 18, 19, 18, 15, 12, 8, 13, 17, 16, 15, 15, 18, 16, 13, 12, 16, 19, 17, 14, 17, 19, 16, 13, 17, 19, 17, 16, 19, 24, 21, 16, 15, 18, 18, 16, 14, 14, 14, 15, 17, 19, 20, 19, 17, 16, 17, 12, 15, 19, 22, 21, 17, 14, 19, 29, 29, 33, 35, 27, 28, 35, 30, 29, 33, 37, 38, 35, 33, 32, 30, 29, 29, 29, 31, 28, 24, 31, 31, 20, 30, 30, 23, 24, 25, 34, 18, 31, 15, 17, 24, 34, 36, 35, 24, 30, 40, 48, 52, 58, 69, 76, 77, 79, 75, 74, 65, 12, 24, 28, 33, 27, 29, 37, 35, 36, 39, 41, 40, 39, 42, 46, 43, 38, 31, 24, 20, 22, 29, 23, 24, 22, 17, 17, 26, 35, 37, 46, 51, 47, 38, 36, 36, 32, 35, 36, 34, 28, 23, 18, 17, 21, 19, 16, 17, 23, 13, 22, 47, 53, 52, 31, 36, 42, 30, 22, 23, 23, 23, 25, 32, 29, 29, 34, 38, 36, 34, 36, 41, 49, 50, 40, 37, 39, 49, 61, 60, 56, 55, 48, 41, 40, 37, 35, 34, 36, 38, 37, 38, 35, 30, 29, 32, 32, 36, 36, 33, 30, 27, 28, 30, 27, 22, 21, 30, 40, 42, 38, 33, 40, 41, 52, 67, 59, 56, 71, 66, 58, 13, 10, 12, 12, 13, 10, 8, 7, 8, 13, 10, 14, 18, 17, 16, 15, 15, 15, 15, 14, 11, 13, 10, 12, 15, 18, 16, 13, 17, 22, 21, 15, 15, 18, 18, 17, 14, 12, 8, 13, 17, 16, 14, 15, 17, 17, 14, 13, 16, 20, 17, 15, 17, 19, 17, 14, 18, 20, 19, 16, 18, 24, 25, 19, 16, 17, 16, 15, 12, 11, 12, 12, 18, 21, 22, 21, 19, 18, 19, 15, 15, 17, 19, 21, 18, 14, 20, 32, 33, 36, 34, 26, 28, 35, 29, 28, 34, 39, 39, 36, 35, 35, 34, 32, 32, 34, 34, 32, 29, 31, 30, 22, 28, 30, 27, 31, 30, 36, 22, 36, 24, 21, 27, 39, 39, 39, 35, 41, 52, 58, 61, 71, 94, 108, 102, 100, 101, 105, 88, 19, 20, 28, 34, 31, 32, 37, 34, 32, 36, 40, 42, 42, 44, 47, 45, 35, 29, 27, 18, 18, 33, 11, 19, 21, 18, 17, 28, 38, 35, 42, 43, 40, 39, 37, 32, 28, 30, 31, 30, 27, 24, 22, 23, 25, 22, 21, 24, 30, 25, 36, 72, 81, 63, 28, 33, 43, 31, 21, 21, 22, 25, 29, 34, 31, 31, 35, 38, 36, 34, 36, 40, 48, 49, 42, 41, 45, 58, 72, 70, 62, 57, 49, 38, 34, 33, 32, 32, 33, 35, 37, 38, 36, 31, 33, 38, 38, 40, 40, 37, 33, 30, 31, 32, 37, 28, 21, 23, 31, 38, 39, 37, 41, 41, 52, 75, 82, 70, 55, 47, 51, 9, 13, 10, 11, 13, 10, 8, 7, 8, 11, 14, 17, 16, 13, 12, 13, 15, 15, 14, 11, 11, 12, 15, 17, 16, 13, 17, 21, 20, 15, 15, 17, 18, 17, 15, 13, 9, 13, 17, 16, 13, 13, 16, 17, 14, 14, 17, 19, 18, 15, 17, 20, 18, 16, 20, 22, 20, 15, 17, 24, 27, 21, 17, 15, 14, 12, 13, 10, 13, 10, 13, 10, 12, 18, 22, 24, 22, 20, 20, 21, 16, 13, 12, 15, 17, 16, 13, 20, 33, 36, 36, 31, 25, 31, 37, 30, 29, 37, 43, 42, 37, 36, 38, 37, 33, 34, 37, 36, 38, 35, 31, 31, 25, 27, 30, 29, 35, 35, 37, 26, 37, 30, 23, 28, 42, 41, 39, 40, 45, 55, 59, 57, 64, 85, 100, 92, 88, 96, 106, 94, 28, 22, 28, 37, 37, 40, 43, 40, 35, 37, 44, 45, 45, 45, 45, 45, 37, 37, 38, 27, 25, 40, 20, 28, 32, 28, 27, 35, 43, 37, 45, 42, 39, 44, 43, 35, 34, 34, 35, 34, 32, 30, 32, 35, 34, 29, 27, 30, 37, 37, 45, 78, 88, 68, 30, 26, 37, 27, 18, 18, 21, 27, 33, 33, 31, 31, 35, 38, 38, 35, 37, 41, 47, 47, 42, 42, 44, 54, 70, 71, 63, 54, 44, 35, 32, 32, 32, 33, 34, 34, 38, 40, 37, 33, 36, 39, 39, 41, 40, 38, 34, 31, 31, 32, 43, 35, 26, 21, 23, 27, 31, 39, 41, 36, 45, 72, 89, 77, 48, 41, 52, 8, 9, 13, 10, 9, 6, 6, 7, 13, 10, 13, 14, 14, 12, 11, 12, 15, 16, 14, 12, 11, 12, 15, 17, 16, 13, 16, 19, 18, 14, 14, 16, 17, 16, 15, 13, 9, 13, 17, 15, 12, 12, 14, 16, 14, 14, 16, 17, 16, 15, 17, 21, 18, 17, 21, 24, 21, 15, 16, 24, 28, 22, 16, 13, 11, 13, 10, 9, 9, 11, 13, 18, 21, 23, 22, 20, 20, 21, 17, 12, 9, 11, 15, 15, 14, 19, 32, 34, 34, 29, 27, 37, 42, 35, 35, 43, 50, 49, 41, 36, 39, 38, 35, 35, 39, 39, 45, 43, 35, 35, 31, 29, 32, 29, 35, 37, 39, 29, 35, 32, 23, 28, 43, 40, 35, 39, 29, 38, 42, 38, 37, 47, 56, 55, 50, 61, 73, 72, 27, 22, 26, 35, 39, 44, 49, 48, 42, 43, 49, 49, 45, 43, 40, 41, 41, 47, 48, 39, 36, 44, 35, 39, 41, 38, 38, 44, 50, 48, 60, 56, 49, 54, 54, 47, 50, 50, 48, 47, 46, 45, 44, 42, 40, 35, 34, 38, 45, 35, 29, 52, 64, 62, 40, 29, 33, 24, 18, 19, 21, 26, 32, 31, 30, 31, 35, 38, 39, 38, 39, 43, 46, 45, 41, 41, 40, 42, 52, 52, 49, 44, 38, 34, 35, 36, 36, 36, 36, 36, 36, 37, 35, 31, 33, 35, 31, 42, 42, 40, 37, 34, 35, 37, 45, 43, 38, 31, 25, 23, 25, 37, 42, 38, 39, 55, 67, 58, 39, 37, 45, 6, 8, 9, 8, 6, 6, 7, 8, 11, 13, 12, 11, 12, 13, 14, 15, 13, 13, 10, 13, 10, 11, 13, 15, 15, 12, 15, 18, 16, 12, 12, 13, 14, 13, 12, 12, 9, 13, 16, 14, 11, 11, 13, 16, 15, 14, 14, 15, 14, 14, 18, 21, 19, 17, 22, 25, 21, 14, 15, 23, 27, 21, 16, 11, 9, 9, 9, 13, 10, 13, 15, 16, 19, 21, 20, 18, 19, 20, 19, 14, 13, 10, 11, 15, 17, 17, 20, 31, 33, 33, 30, 32, 44, 42, 37, 36, 43, 49, 49, 43, 39, 41, 40, 37, 38, 41, 43, 51, 50, 40, 41, 37, 34, 34, 28, 32, 37, 41, 33, 31, 32, 25, 29, 43, 40, 31, 36, 29, 36, 41, 42, 40, 41, 41, 36, 32, 39, 40, 43, 21, 22, 23, 30, 34, 40, 47, 49, 46, 47, 52, 50, 44, 39, 36, 33, 40, 44, 40, 36, 36, 35, 32, 32, 33, 35, 40, 46, 50, 63, 80, 77, 67, 68, 67, 65, 69, 68, 67, 67, 66, 66, 61, 54, 53, 52, 54, 60, 66, 30, 8, 19, 23, 36, 39, 29, 35, 28, 24, 23, 22, 22, 26, 30, 29, 31, 34, 36, 38, 37, 38, 42, 44, 42, 40, 40, 42, 43, 36, 31, 35, 43, 48, 44, 40, 40, 39, 38, 38, 38, 41, 44, 44, 44, 48, 49, 43, 55, 56, 57, 56, 56, 59, 62, 61, 63, 64, 59, 52, 48, 43, 37, 52, 56, 49, 42, 32, 24, 24, 26, 24, 7, 9, 13, 10, 9, 7, 8, 8, 7, 9, 12, 11, 11, 13, 13, 11, 11, 13, 10, 7, 7, 8, 11, 14, 13, 11, 14, 16, 13, 8, 7, 8, 13, 10, 9, 9, 9, 9, 13, 16, 14, 13, 10, 9, 11, 12, 12, 12, 12, 11, 11, 12, 17, 20, 17, 15, 19, 22, 18, 13, 14, 21, 23, 17, 13, 11, 9, 8, 9, 13, 10, 13, 15, 15, 16, 18, 18, 17, 17, 18, 16, 14, 13, 10, 9, 11, 15, 19, 23, 31, 33, 35, 33, 38, 51, 42, 39, 38, 42, 46, 49, 46, 43, 42, 42, 41, 42, 43, 41, 47, 45, 39, 39, 34, 32, 34, 28, 32, 40, 42, 35, 28, 32, 28, 30, 43, 42, 33, 37, 32, 31, 34, 38, 41, 40, 39, 44, 42, 49, 36, 37, 28, 28, 25, 29, 32, 37, 42, 45, 43, 44, 46, 45, 41, 38, 37, 35, 39, 34, 25, 25, 29, 27, 26, 23, 22, 25, 31, 35, 35, 32, 48, 50, 39, 34, 34, 32, 35, 36, 37, 38, 38, 38, 38, 37, 35, 35, 37, 40, 42, 26, 13, 20, 7, 13, 26, 23, 27, 23, 23, 25, 23, 22, 25, 33, 32, 33, 33, 34, 34, 34, 34, 41, 43, 42, 43, 42, 43, 43, 36, 35, 43, 51, 54, 46, 39, 38, 37, 37, 37, 37, 43, 48, 50, 53, 60, 63, 59, 56, 58, 60, 62, 66, 71, 75, 80, 79, 76, 70, 65, 63, 62, 62, 78, 83, 77, 67, 55, 46, 46, 50, 47, 8, 11, 12, 11, 13, 10, 13, 10, 11, 7, 13, 10, 11, 11, 11, 12, 13, 13, 10, 13, 10, 9, 6, 5, 7, 9, 12, 11, 9, 12, 14, 13, 10, 7, 7, 8, 8, 9, 9, 9, 13, 10, 13, 16, 13, 9, 8, 13, 10, 13, 10, 13, 10, 13, 10, 9, 8, 8, 9, 15, 17, 14, 12, 15, 18, 15, 11, 14, 19, 19, 13, 11, 11, 13, 10, 9, 8, 13, 10, 11, 13, 13, 14, 17, 16, 15, 15, 17, 14, 14, 12, 9, 8, 14, 20, 24, 31, 33, 38, 36, 39, 53, 49, 48, 47, 48, 51, 55, 52, 45, 41, 40, 43, 43, 41, 37, 40, 39, 37, 37, 29, 30, 34, 29, 36, 43, 42, 37, 30, 30, 31, 30, 40, 45, 39, 41, 41, 37, 36, 39, 42, 41, 40, 41, 39, 47, 32, 32, 28, 29, 29, 32, 34, 37, 39, 42, 41, 41, 43, 42, 39, 39, 42, 42, 38, 31, 26, 26, 28, 28, 31, 30, 29, 29, 30, 31, 31, 31, 43, 47, 40, 33, 31, 31, 30, 31, 33, 34, 34, 33, 34, 34, 33, 33, 32, 31, 30, 24, 13, 26, 19, 21, 34, 35, 21, 18, 20, 23, 23, 24, 28, 34, 34, 34, 34, 34, 35, 34, 35, 42, 44, 43, 44, 42, 38, 34, 35, 42, 48, 46, 40, 37, 36, 34, 33, 34, 35, 37, 35, 34, 33, 35, 42, 47, 42, 38, 40, 42, 44, 47, 52, 56, 64, 59, 52, 47, 44, 44, 43, 38, 48, 52, 51, 51, 51, 45, 35, 35, 39, 11, 13, 15, 14, 13, 13, 13, 9, 11, 11, 11, 13, 10, 12, 13, 11, 11, 13, 10, 7, 6, 8, 9, 11, 13, 10, 8, 11, 13, 9, 8, 9, 9, 13, 10, 13, 10, 11, 11, 13, 10, 13, 16, 13, 8, 7, 9, 8, 9, 8, 7, 6, 6, 7, 12, 14, 11, 8, 12, 14, 12, 11, 14, 17, 15, 9, 9, 12, 11, 9, 8, 8, 9, 13, 10, 11, 13, 16, 16, 15, 15, 16, 15, 17, 16, 11, 9, 15, 24, 23, 29, 33, 39, 37, 38, 50, 45, 45, 44, 42, 44, 50, 50, 45, 39, 38, 42, 42, 38, 35, 38, 37, 39, 38, 29, 32, 35, 32, 41, 47, 41, 39, 34, 29, 32, 27, 36, 47, 43, 44, 43, 39, 37, 39, 41, 39, 39, 41, 35, 44, 30, 32, 31, 29, 28, 31, 35, 37, 37, 39, 40, 41, 42, 40, 39, 42, 46, 47, 35, 31, 36, 33, 29, 32, 35, 39, 40, 39, 37, 36, 37, 34, 39, 45, 43, 36, 34, 34, 31, 32, 32, 32, 31, 29, 28, 28, 29, 31, 31, 29, 26, 30, 15, 33, 37, 37, 42, 38, 25, 22, 23, 25, 24, 24, 29, 33, 34, 35, 35, 36, 37, 38, 38, 46, 47, 43, 43, 40, 38, 41, 45, 51, 51, 45, 40, 35, 33, 31, 30, 32, 35, 38, 45, 44, 37, 34, 40, 43, 40, 35, 36, 36, 36, 37, 40, 44, 42, 37, 31, 30, 31, 31, 31, 29, 37, 42, 44, 49, 54, 51, 35, 29, 40, 14, 16, 17, 15, 14, 13, 14, 11, 12, 12, 12, 12, 13, 14, 14, 14, 13, 11, 13, 10, 11, 12, 12, 11, 13, 10, 12, 13, 13, 10, 13, 10, 11, 13, 10, 11, 11, 11, 11, 9, 12, 14, 12, 8, 7, 9, 7, 8, 7, 6, 6, 6, 7, 11, 11, 8, 6, 9, 11, 11, 13, 10, 12, 13, 12, 8, 9, 13, 10, 9, 9, 8, 8, 9, 13, 10, 12, 13, 14, 15, 15, 15, 15, 16, 20, 19, 14, 13, 18, 24, 21, 28, 34, 39, 38, 39, 45, 40, 39, 38, 35, 39, 43, 48, 45, 40, 39, 42, 41, 38, 39, 41, 40, 42, 41, 33, 35, 36, 35, 43, 49, 44, 41, 37, 31, 32, 28, 33, 45, 48, 47, 43, 41, 39, 39, 40, 41, 43, 45, 41, 43, 31, 31, 31, 29, 29, 33, 37, 39, 39, 41, 42, 42, 42, 41, 40, 42, 45, 45, 36, 36, 41, 38, 33, 37, 36, 42, 48, 47, 43, 44, 41, 36, 38, 45, 48, 41, 36, 35, 32, 35, 35, 33, 31, 28, 25, 26, 29, 30, 29, 28, 27, 35, 26, 36, 45, 45, 41, 30, 25, 25, 27, 26, 23, 23, 27, 31, 33, 35, 37, 38, 40, 41, 43, 49, 49, 45, 42, 39, 41, 49, 51, 55, 54, 47, 43, 40, 37, 35, 33, 33, 35, 37, 47, 46, 39, 34, 36, 38, 35, 29, 31, 32, 32, 32, 36, 40, 29, 26, 24, 26, 30, 32, 32, 33, 38, 43, 48, 55, 61, 57, 42, 37, 47, 17, 18, 18, 15, 13, 13, 14, 13, 13, 14, 15, 15, 16, 16, 17, 16, 16, 16, 15, 15, 16, 15, 14, 13, 15, 15, 15, 13, 12, 11, 11, 11, 13, 10, 13, 10, 9, 12, 14, 12, 9, 9, 13, 10, 13, 10, 13, 10, 9, 9, 9, 13, 10, 11, 14, 11, 9, 8, 9, 12, 13, 11, 11, 13, 10, 13, 10, 13, 10, 11, 13, 10, 9, 9, 11, 12, 13, 14, 15, 14, 13, 14, 18, 17, 15, 16, 21, 19, 15, 15, 19, 19, 17, 29, 36, 38, 41, 43, 43, 39, 37, 37, 36, 42, 41, 48, 46, 44, 43, 43, 42, 40, 44, 44, 42, 45, 44, 38, 37, 38, 36, 40, 46, 45, 40, 37, 37, 36, 32, 34, 43, 50, 49, 47, 45, 42, 39, 40, 46, 48, 46, 50, 42, 31, 28, 29, 31, 34, 38, 41, 42, 43, 45, 44, 43, 43, 42, 41, 41, 40, 40, 41, 41, 39, 37, 37, 40, 37, 42, 52, 50, 47, 49, 41, 34, 38, 46, 50, 42, 37, 36, 34, 39, 39, 36, 37, 34, 29, 29, 34, 33, 30, 30, 30, 32, 32, 34, 41, 43, 35, 22, 24, 27, 28, 25, 24, 26, 29, 32, 34, 36, 39, 40, 41, 42, 46, 48, 49, 46, 42, 40, 42, 46, 46, 50, 51, 45, 42, 42, 41, 40, 38, 37, 36, 35, 36, 34, 31, 29, 29, 29, 28, 22, 26, 29, 29, 31, 36, 42, 30, 29, 30, 33, 38, 39, 39, 39, 40, 43, 48, 55, 60, 57, 49, 50, 52, 16, 17, 17, 15, 13, 13, 15, 16, 16, 17, 17, 17, 17, 17, 17, 17, 17, 16, 16, 16, 18, 19, 17, 17, 19, 20, 19, 15, 14, 13, 13, 13, 12, 12, 12, 15, 17, 15, 12, 12, 13, 17, 16, 15, 15, 15, 16, 17, 19, 18, 16, 14, 15, 16, 16, 15, 15, 14, 14, 14, 15, 15, 14, 14, 15, 16, 17, 17, 18, 16, 15, 17, 20, 20, 17, 18, 22, 19, 14, 16, 20, 21, 17, 29, 36, 38, 41, 45, 43, 33, 37, 42, 43, 45, 38, 45, 46, 44, 45, 45, 45, 42, 43, 42, 41, 46, 46, 43, 42, 37, 33, 35, 40, 40, 36, 35, 46, 44, 39, 37, 42, 47, 47, 52, 49, 44, 40, 40, 44, 46, 44, 44, 36, 28, 29, 34, 37, 40, 42, 42, 42, 44, 47, 47, 46, 45, 43, 42, 41, 40, 42, 44, 45, 40, 36, 36, 39, 43, 47, 55, 52, 49, 51, 42, 33, 39, 46, 44, 36, 33, 37, 39, 41, 39, 37, 40, 41, 34, 31, 35, 37, 37, 35, 31, 24, 22, 27, 36, 41, 34, 24, 34, 28, 23, 24, 31, 36, 39, 41, 41, 41, 41, 40, 40, 40, 43, 46, 48, 46, 43, 42, 39, 33, 31, 35, 39, 38, 37, 35, 33, 36, 38, 38, 37, 36, 35, 34, 32, 33, 35, 37, 38, 34, 38, 39, 39, 37, 40, 44, 38, 37, 38, 41, 45, 46, 46, 46, 46, 47, 48, 49, 50, 54, 58, 54, 52, 14, 16, 17, 15, 13, 14, 16, 16, 16, 16, 15, 15, 15, 16, 17, 17, 16, 16, 15, 15, 18, 19, 17, 18, 20, 22, 21, 17, 16, 15, 15, 14, 14, 14, 16, 18, 20, 18, 16, 16, 17, 19, 18, 18, 18, 18, 19, 20, 25, 24, 23, 22, 20, 20, 20, 20, 20, 20, 20, 20, 20, 19, 19, 19, 19, 19, 19, 19, 20, 20, 19, 20, 22, 22, 20, 20, 22, 19, 14, 16, 21, 23, 19, 30, 36, 37, 39, 44, 44, 39, 37, 38, 38, 44, 43, 50, 46, 47, 48, 50, 48, 45, 45, 42, 42, 46, 47, 43, 42, 40, 36, 36, 41, 41, 38, 39, 38, 41, 39, 37, 43, 51, 53, 59, 56, 52, 46, 44, 45, 46, 45, 41, 31, 24, 30, 39, 42, 44, 44, 43, 42, 44, 48, 48, 47, 47, 46, 44, 43, 43, 44, 47, 46, 41, 35, 35, 39, 39, 43, 51, 48, 47, 51, 40, 34, 41, 45, 40, 30, 32, 37, 37, 37, 33, 31, 37, 41, 40, 37, 37, 38, 37, 32, 25, 34, 30, 20, 19, 26, 32, 34, 14, 14, 16, 18, 23, 30, 38, 38, 38, 40, 41, 43, 44, 44, 43, 46, 48, 46, 45, 45, 40, 28, 23, 27, 34, 36, 35, 32, 32, 37, 42, 42, 39, 37, 35, 35, 35, 36, 38, 41, 43, 37, 41, 45, 43, 40, 41, 44, 43, 41, 41, 44, 47, 48, 46, 44, 46, 49, 51, 52, 52, 60, 68, 60, 54, 15, 16, 17, 16, 15, 16, 18, 18, 18, 17, 17, 16, 16, 16, 18, 18, 18, 17, 17, 17, 18, 18, 16, 18, 20, 22, 22, 18, 17, 16, 16, 15, 15, 15, 17, 19, 20, 19, 18, 18, 18, 18, 18, 17, 17, 17, 18, 19, 26, 26, 25, 24, 22, 20, 20, 21, 21, 22, 22, 22, 22, 20, 19, 19, 18, 18, 17, 17, 20, 20, 20, 20, 21, 21, 21, 19, 22, 20, 17, 19, 22, 21, 22, 32, 36, 35, 37, 41, 44, 47, 41, 37, 35, 43, 47, 53, 47, 47, 50, 52, 51, 48, 49, 46, 44, 47, 46, 41, 38, 41, 39, 40, 45, 44, 42, 42, 28, 33, 35, 35, 41, 52, 56, 58, 58, 55, 50, 45, 43, 45, 49, 42, 29, 23, 32, 41, 44, 44, 44, 44, 44, 45, 49, 47, 47, 47, 48, 48, 48, 48, 45, 45, 43, 40, 36, 36, 36, 33, 38, 45, 43, 47, 52, 41, 34, 40, 43, 38, 32, 34, 37, 35, 35, 29, 27, 33, 37, 35, 30, 28, 29, 29, 28, 29, 25, 24, 25, 31, 33, 28, 20, 26, 24, 23, 27, 35, 42, 46, 38, 39, 40, 42, 45, 47, 47, 44, 47, 48, 47, 46, 46, 43, 33, 26, 29, 36, 36, 33, 33, 35, 39, 43, 41, 38, 35, 36, 37, 36, 36, 36, 39, 41, 33, 38, 43, 44, 43, 43, 45, 43, 41, 41, 43, 46, 46, 45, 43, 46, 49, 52, 54, 56, 61, 66, 58, 52, 17, 18, 19, 18, 17, 19, 20, 22, 22, 21, 21, 20, 20, 20, 20, 20, 19, 19, 18, 18, 19, 18, 17, 18, 21, 23, 23, 18, 17, 17, 16, 16, 15, 15, 17, 18, 18, 19, 19, 18, 17, 19, 18, 18, 18, 18, 18, 20, 24, 25, 25, 23, 21, 18, 17, 19, 20, 22, 22, 22, 21, 20, 18, 18, 17, 16, 16, 15, 18, 20, 20, 20, 20, 20, 20, 18, 21, 21, 20, 22, 23, 20, 23, 31, 35, 34, 36, 41, 44, 47, 45, 45, 43, 46, 44, 50, 48, 48, 51, 53, 53, 50, 52, 51, 48, 50, 47, 41, 38, 39, 37, 40, 46, 45, 41, 40, 31, 36, 37, 35, 40, 48, 52, 51, 54, 55, 52, 45, 40, 42, 49, 40, 28, 24, 34, 42, 43, 43, 46, 47, 47, 48, 50, 48, 48, 48, 49, 49, 50, 50, 46, 42, 38, 38, 38, 36, 34, 34, 39, 45, 43, 50, 56, 43, 33, 36, 37, 35, 34, 35, 37, 38, 38, 32, 30, 33, 36, 34, 31, 31, 33, 35, 43, 57, 66, 70, 77, 85, 88, 81, 72, 59, 43, 28, 28, 35, 38, 35, 45, 44, 43, 42, 43, 44, 44, 45, 47, 47, 45, 43, 44, 43, 36, 29, 32, 38, 37, 31, 33, 36, 37, 38, 36, 34, 32, 36, 38, 38, 36, 34, 36, 39, 32, 38, 45, 47, 46, 47, 49, 46, 44, 43, 45, 47, 47, 48, 50, 49, 49, 49, 50, 51, 54, 55, 50, 46, 19, 21, 21, 20, 19, 20, 22, 24, 24, 24, 23, 23, 22, 22, 22, 22, 21, 21, 20, 20, 21, 20, 19, 19, 23, 24, 24, 19, 17, 17, 16, 16, 16, 15, 17, 17, 17, 18, 19, 18, 17, 18, 18, 17, 17, 17, 18, 19, 21, 22, 22, 21, 19, 16, 15, 17, 18, 21, 21, 21, 20, 19, 18, 18, 17, 17, 16, 15, 18, 20, 20, 19, 18, 18, 19, 18, 21, 22, 22, 25, 25, 20, 23, 32, 35, 33, 38, 44, 47, 48, 47, 48, 47, 48, 44, 50, 49, 48, 50, 52, 53, 51, 54, 53, 51, 53, 51, 45, 43, 39, 36, 41, 48, 46, 41, 38, 38, 42, 41, 39, 43, 49, 51, 48, 52, 56, 54, 48, 42, 41, 45, 37, 28, 28, 38, 44, 42, 42, 47, 50, 50, 50, 51, 50, 49, 48, 48, 47, 47, 46, 45, 39, 35, 37, 39, 37, 33, 37, 42, 45, 42, 50, 57, 42, 32, 33, 33, 33, 35, 36, 36, 41, 42, 37, 33, 35, 36, 36, 35, 36, 40, 41, 53, 76, 90, 89, 88, 89, 92, 93, 92, 85, 75, 61, 49, 40, 34, 31, 45, 43, 41, 39, 39, 39, 40, 43, 44, 44, 41, 39, 40, 41, 37, 32, 35, 40, 38, 32, 33, 36, 35, 34, 33, 33, 33, 36, 39, 39, 37, 34, 36, 40, 35, 41, 47, 49, 48, 48, 50, 48, 45, 45, 47, 49, 49, 50, 54, 51, 47, 45, 45, 46, 47, 46, 44, 43, 20, 22, 22, 21, 19, 19, 21, 23, 23, 23, 22, 22, 22, 22, 23, 23, 22, 22, 21, 21, 23, 23, 21, 21, 24, 25, 25, 20, 19, 19, 17, 17, 17, 17, 17, 17, 17, 19, 20, 19, 17, 17, 17, 16, 16, 16, 17, 18, 20, 20, 21, 20, 18, 16, 15, 15, 17, 20, 21, 21, 19, 19, 19, 19, 19, 18, 17, 17, 19, 21, 22, 21, 19, 19, 20, 20, 22, 22, 22, 26, 26, 21, 27, 34, 36, 35, 39, 46, 50, 51, 47, 44, 42, 48, 48, 55, 50, 48, 48, 51, 52, 51, 54, 53, 51, 55, 54, 50, 48, 41, 39, 43, 49, 48, 42, 39, 43, 45, 44, 44, 48, 53, 53, 50, 54, 57, 55, 51, 47, 44, 41, 36, 31, 34, 43, 44, 41, 42, 46, 49, 49, 49, 50, 50, 49, 48, 45, 43, 41, 40, 43, 40, 37, 37, 37, 36, 33, 39, 43, 43, 39, 48, 54, 38, 31, 34, 32, 32, 35, 36, 36, 42, 43, 38, 34, 36, 36, 36, 34, 35, 39, 37, 46, 68, 79, 74, 65, 59, 60, 64, 67, 80, 92, 93, 71, 43, 31, 33, 38, 36, 35, 34, 35, 37, 38, 40, 41, 41, 38, 37, 37, 39, 39, 35, 38, 41, 39, 36, 35, 35, 33, 33, 34, 36, 38, 37, 38, 40, 37, 35, 37, 41, 38, 43, 49, 49, 47, 47, 48, 47, 45, 45, 47, 49, 50, 50, 53, 50, 46, 43, 44, 44, 45, 44, 42, 43, 21, 23, 22, 20, 19, 19, 20, 20, 20, 20, 20, 21, 21, 22, 23, 23, 23, 22, 22, 22, 23, 24, 22, 22, 24, 25, 24, 21, 20, 20, 19, 19, 19, 18, 19, 18, 18, 21, 23, 22, 19, 19, 19, 18, 17, 18, 19, 19, 20, 21, 21, 20, 19, 18, 16, 15, 17, 20, 21, 21, 20, 19, 20, 20, 20, 20, 19, 19, 22, 24, 25, 23, 20, 21, 23, 24, 24, 20, 20, 26, 28, 26, 35, 40, 40, 37, 40, 46, 49, 51, 44, 39, 37, 47, 52, 59, 51, 48, 46, 48, 50, 51, 53, 51, 50, 55, 55, 51, 49, 45, 42, 45, 50, 50, 45, 44, 43, 44, 43, 44, 51, 55, 53, 54, 56, 56, 54, 51, 50, 48, 41, 39, 38, 43, 49, 44, 40, 42, 44, 45, 44, 44, 46, 46, 45, 44, 42, 39, 37, 36, 41, 44, 43, 38, 33, 33, 35, 35, 39, 39, 34, 44, 51, 35, 32, 39, 37, 33, 35, 36, 37, 40, 41, 36, 33, 36, 37, 34, 28, 28, 32, 28, 28, 42, 59, 60, 54, 49, 45, 42, 39, 51, 70, 80, 63, 38, 28, 33, 35, 33, 32, 32, 34, 37, 37, 38, 39, 39, 38, 37, 39, 41, 40, 36, 38, 39, 37, 38, 37, 34, 34, 34, 35, 37, 39, 37, 38, 40, 37, 33, 36, 41, 40, 45, 49, 49, 46, 46, 48, 46, 45, 45, 47, 49, 50, 50, 50, 49, 48, 47, 47, 47, 47, 44, 42, 42, 22, 23, 22, 20, 17, 18, 19, 21, 21, 22, 22, 23, 24, 24, 24, 24, 23, 23, 23, 22, 24, 24, 22, 21, 23, 23, 22, 22, 22, 22, 21, 21, 20, 20, 22, 20, 19, 23, 25, 24, 21, 25, 25, 23, 23, 24, 25, 24, 22, 22, 22, 22, 21, 21, 19, 16, 18, 22, 23, 22, 21, 20, 20, 20, 20, 20, 20, 20, 24, 27, 28, 26, 23, 23, 25, 28, 24, 18, 17, 24, 29, 29, 44, 47, 45, 39, 39, 43, 44, 41, 41, 45, 45, 51, 49, 55, 51, 47, 45, 46, 49, 50, 52, 50, 49, 53, 53, 49, 47, 47, 43, 44, 48, 48, 46, 46, 45, 43, 41, 42, 48, 50, 46, 54, 53, 50, 47, 46, 48, 49, 46, 45, 46, 50, 53, 44, 39, 41, 40, 38, 37, 38, 41, 42, 40, 39, 38, 37, 35, 34, 40, 47, 49, 40, 30, 31, 37, 32, 36, 36, 32, 45, 53, 36, 36, 46, 44, 35, 35, 39, 39, 42, 42, 36, 33, 38, 41, 40, 35, 35, 43, 39, 33, 39, 56, 54, 42, 33, 32, 37, 42, 47, 38, 32, 36, 44, 46, 43, 44, 41, 38, 35, 34, 35, 36, 39, 40, 40, 40, 40, 43, 44, 41, 35, 34, 33, 31, 34, 34, 32, 32, 32, 33, 33, 35, 36, 39, 40, 36, 31, 32, 38, 42, 47, 51, 51, 49, 50, 53, 49, 47, 47, 50, 52, 53, 53, 54, 54, 53, 52, 49, 47, 45, 43, 39, 37, 24, 26, 27, 26, 24, 25, 25, 23, 23, 24, 24, 24, 26, 26, 27, 26, 25, 24, 25, 25, 25, 23, 22, 23, 25, 26, 24, 24, 24, 24, 23, 22, 22, 22, 20, 21, 23, 24, 26, 26, 25, 24, 24, 25, 24, 24, 23, 23, 22, 22, 22, 24, 24, 22, 21, 21, 21, 23, 23, 24, 23, 23, 22, 19, 17, 18, 20, 23, 24, 24, 24, 24, 24, 26, 27, 31, 29, 26, 24, 24, 25, 26, 35, 44, 54, 54, 48, 48, 51, 46, 47, 49, 58, 55, 52, 59, 63, 55, 45, 50, 59, 56, 50, 55, 58, 52, 51, 55, 53, 54, 54, 50, 45, 48, 50, 50, 48, 42, 42, 48, 51, 51, 51, 55, 53, 50, 46, 48, 54, 58, 52, 41, 35, 39, 42, 40, 37, 38, 37, 35, 33, 34, 38, 36, 35, 34, 34, 33, 33, 33, 41, 48, 51, 45, 36, 34, 38, 39, 36, 32, 36, 47, 49, 41, 39, 49, 41, 31, 37, 39, 36, 44, 40, 35, 32, 35, 40, 40, 33, 30, 35, 28, 19, 26, 36, 38, 33, 28, 27, 32, 40, 52, 44, 36, 34, 33, 36, 41, 46, 45, 41, 37, 35, 35, 37, 39, 42, 43, 43, 42, 44, 43, 36, 31, 30, 30, 29, 32, 33, 30, 31, 34, 31, 29, 35, 38, 38, 37, 36, 35, 36, 37, 39, 47, 57, 53, 61, 61, 61, 58, 52, 47, 47, 48, 48, 48, 51, 50, 53, 53, 44, 40, 44, 44, 38, 34, 23, 26, 27, 25, 24, 24, 25, 25, 25, 26, 26, 26, 26, 27, 26, 26, 24, 23, 24, 24, 24, 22, 21, 22, 24, 25, 23, 23, 24, 23, 23, 22, 22, 22, 20, 21, 22, 24, 24, 24, 24, 22, 22, 23, 23, 23, 22, 22, 23, 22, 22, 25, 25, 22, 21, 22, 22, 23, 23, 23, 24, 24, 24, 21, 20, 20, 22, 24, 25, 25, 24, 24, 24, 26, 26, 30, 28, 27, 26, 26, 27, 28, 27, 35, 48, 53, 49, 47, 49, 52, 48, 46, 55, 50, 43, 48, 55, 54, 48, 52, 58, 50, 47, 54, 57, 52, 50, 53, 53, 53, 55, 52, 48, 52, 57, 59, 54, 46, 44, 47, 48, 49, 52, 56, 52, 49, 49, 52, 55, 56, 52, 42, 36, 37, 38, 34, 34, 38, 38, 37, 35, 36, 38, 37, 37, 36, 35, 34, 35, 36, 45, 48, 49, 46, 40, 37, 37, 34, 35, 34, 37, 44, 47, 43, 41, 43, 37, 33, 36, 34, 31, 35, 35, 34, 32, 33, 38, 36, 31, 33, 35, 34, 33, 36, 40, 40, 39, 35, 32, 35, 41, 41, 33, 28, 26, 26, 30, 38, 42, 42, 41, 38, 36, 38, 40, 40, 42, 44, 43, 42, 43, 42, 37, 32, 32, 30, 28, 32, 34, 32, 33, 36, 33, 31, 37, 39, 37, 35, 35, 36, 38, 40, 39, 43, 55, 50, 57, 55, 57, 55, 52, 50, 51, 53, 51, 49, 51, 49, 50, 50, 44, 41, 44, 43, 38, 34, 23, 25, 25, 23, 22, 22, 23, 25, 25, 26, 26, 26, 27, 26, 25, 23, 23, 22, 22, 23, 23, 22, 21, 22, 23, 23, 21, 23, 23, 23, 23, 22, 21, 21, 20, 21, 22, 23, 23, 22, 22, 19, 20, 21, 22, 22, 21, 22, 23, 23, 23, 25, 25, 23, 22, 22, 22, 23, 23, 23, 24, 25, 25, 24, 23, 23, 24, 25, 26, 26, 25, 24, 25, 26, 26, 28, 28, 27, 28, 29, 32, 33, 30, 34, 46, 54, 53, 51, 52, 54, 46, 44, 55, 52, 44, 43, 46, 51, 50, 52, 55, 47, 48, 53, 55, 54, 52, 53, 54, 51, 56, 58, 56, 57, 57, 55, 53, 46, 43, 44, 45, 49, 56, 60, 53, 49, 50, 51, 47, 45, 45, 41, 39, 40, 39, 35, 34, 37, 40, 40, 38, 37, 38, 38, 38, 38, 37, 36, 38, 41, 50, 48, 46, 47, 46, 42, 36, 29, 37, 39, 38, 40, 44, 44, 46, 40, 38, 39, 36, 32, 33, 37, 41, 41, 36, 34, 36, 35, 36, 40, 38, 41, 47, 44, 39, 39, 41, 40, 39, 41, 44, 39, 32, 28, 28, 30, 35, 43, 38, 39, 39, 38, 39, 42, 43, 42, 44, 45, 43, 41, 42, 42, 39, 36, 35, 32, 29, 34, 37, 34, 35, 37, 35, 34, 39, 38, 36, 34, 34, 36, 40, 44, 43, 42, 53, 51, 55, 51, 56, 51, 49, 49, 51, 53, 53, 53, 53, 51, 47, 45, 43, 43, 44, 43, 38, 36, 24, 25, 25, 22, 20, 21, 22, 24, 24, 25, 26, 26, 26, 26, 24, 23, 22, 21, 21, 22, 23, 23, 21, 21, 22, 22, 20, 22, 23, 23, 23, 22, 22, 21, 21, 22, 22, 22, 22, 21, 20, 17, 18, 20, 21, 21, 21, 22, 24, 23, 24, 25, 26, 24, 22, 22, 22, 23, 23, 23, 24, 25, 25, 25, 25, 25, 25, 26, 27, 26, 26, 25, 25, 26, 27, 28, 28, 28, 30, 32, 36, 37, 36, 36, 44, 51, 53, 53, 54, 50, 44, 44, 59, 58, 52, 46, 42, 50, 50, 51, 54, 50, 52, 54, 54, 58, 56, 53, 57, 50, 57, 63, 60, 56, 53, 48, 49, 46, 45, 45, 44, 50, 61, 67, 59, 52, 51, 50, 43, 38, 38, 39, 41, 43, 41, 37, 35, 36, 40, 42, 40, 38, 38, 38, 39, 39, 38, 38, 42, 47, 53, 49, 46, 49, 52, 47, 40, 34, 44, 47, 42, 41, 45, 47, 52, 43, 43, 44, 38, 35, 39, 45, 49, 47, 38, 33, 34, 38, 45, 49, 43, 49, 56, 48, 37, 37, 40, 43, 45, 47, 49, 42, 35, 32, 33, 34, 38, 46, 37, 39, 41, 41, 43, 46, 48, 46, 47, 47, 44, 41, 41, 42, 41, 40, 39, 34, 30, 35, 38, 35, 35, 37, 36, 34, 38, 37, 35, 34, 33, 36, 41, 45, 47, 42, 53, 54, 56, 51, 61, 54, 50, 46, 46, 50, 54, 57, 57, 54, 47, 42, 43, 43, 43, 43, 39, 38, 25, 26, 25, 22, 20, 21, 23, 24, 24, 25, 25, 26, 26, 26, 25, 24, 22, 22, 22, 23, 25, 25, 23, 23, 24, 23, 21, 22, 23, 23, 23, 22, 22, 21, 23, 23, 23, 23, 22, 20, 20, 18, 19, 21, 22, 23, 23, 23, 25, 24, 25, 26, 26, 25, 23, 22, 23, 23, 23, 24, 24, 25, 26, 26, 26, 26, 26, 26, 26, 26, 26, 26, 27, 27, 28, 29, 29, 29, 31, 34, 37, 39, 38, 39, 44, 48, 47, 48, 50, 42, 41, 45, 58, 57, 53, 49, 42, 50, 51, 51, 54, 54, 55, 52, 51, 57, 56, 51, 56, 52, 56, 58, 53, 50, 50, 49, 50, 50, 51, 49, 46, 50, 61, 68, 61, 54, 51, 50, 47, 43, 39, 41, 43, 43, 41, 38, 36, 36, 40, 41, 40, 40, 40, 39, 39, 40, 39, 39, 44, 51, 53, 50, 49, 53, 56, 53, 48, 50, 57, 56, 49, 47, 50, 51, 53, 49, 48, 47, 44, 42, 45, 49, 51, 46, 37, 33, 36, 42, 48, 49, 47, 52, 56, 48, 39, 39, 43, 45, 48, 50, 50, 43, 37, 33, 33, 32, 34, 40, 39, 42, 44, 45, 47, 50, 52, 49, 50, 49, 46, 43, 42, 43, 44, 42, 41, 35, 31, 36, 38, 35, 35, 35, 35, 35, 36, 37, 36, 34, 33, 36, 40, 44, 46, 37, 50, 56, 58, 53, 65, 63, 55, 47, 43, 47, 55, 58, 58, 57, 48, 43, 45, 43, 42, 42, 39, 38, 27, 28, 26, 23, 21, 23, 24, 26, 26, 27, 27, 28, 28, 28, 26, 25, 24, 24, 24, 24, 26, 27, 25, 25, 26, 25, 23, 24, 24, 24, 23, 23, 22, 22, 25, 25, 25, 25, 23, 22, 21, 20, 21, 23, 24, 25, 25, 25, 26, 24, 25, 27, 27, 25, 23, 23, 24, 24, 25, 25, 25, 25, 25, 25, 25, 25, 25, 25, 26, 26, 26, 26, 27, 29, 31, 29, 29, 28, 30, 32, 35, 37, 41, 47, 56, 55, 46, 44, 44, 36, 39, 43, 50, 44, 41, 42, 41, 50, 53, 52, 54, 55, 54, 48, 46, 53, 52, 48, 52, 54, 54, 48, 41, 44, 54, 60, 54, 57, 59, 55, 47, 47, 53, 51, 48, 44, 42, 43, 48, 50, 47, 47, 45, 42, 38, 34, 35, 39, 41, 41, 41, 42, 44, 42, 42, 42, 40, 38, 43, 50, 51, 52, 55, 57, 58, 57, 56, 68, 68, 62, 56, 56, 57, 54, 48, 54, 51, 48, 51, 54, 53, 53, 53, 48, 43, 43, 49, 45, 35, 35, 41, 45, 44, 40, 46, 49, 48, 48, 48, 47, 46, 43, 37, 33, 33, 31, 32, 37, 41, 45, 47, 48, 49, 51, 52, 51, 52, 52, 48, 45, 44, 45, 44, 43, 42, 38, 33, 36, 38, 36, 35, 34, 34, 35, 35, 38, 37, 35, 33, 35, 37, 40, 39, 31, 44, 51, 57, 53, 65, 71, 64, 54, 48, 49, 54, 57, 55, 54, 51, 48, 48, 46, 42, 39, 36, 35, 29, 28, 27, 25, 23, 25, 28, 29, 30, 30, 30, 31, 31, 31, 28, 27, 26, 26, 26, 26, 27, 27, 25, 26, 27, 26, 25, 25, 26, 25, 25, 24, 24, 24, 26, 27, 27, 26, 25, 24, 24, 24, 24, 26, 27, 27, 27, 27, 27, 25, 25, 28, 28, 25, 24, 25, 25, 26, 26, 27, 27, 26, 24, 23, 23, 23, 23, 24, 26, 27, 27, 27, 28, 30, 31, 28, 27, 27, 28, 30, 33, 34, 30, 43, 57, 55, 40, 32, 32, 36, 40, 42, 45, 36, 35, 38, 37, 48, 55, 54, 52, 50, 50, 48, 47, 51, 53, 51, 52, 53, 55, 53, 50, 51, 54, 52, 48, 52, 58, 57, 49, 46, 50, 46, 44, 40, 36, 37, 45, 49, 47, 45, 44, 44, 41, 38, 38, 41, 43, 44, 44, 46, 48, 46, 46, 47, 43, 38, 39, 45, 50, 55, 59, 59, 57, 58, 60, 67, 64, 56, 53, 56, 56, 51, 45, 55, 54, 51, 59, 65, 63, 60, 57, 52, 49, 50, 54, 57, 55, 54, 58, 58, 54, 52, 48, 45, 45, 47, 48, 46, 44, 46, 41, 40, 41, 40, 40, 45, 42, 45, 47, 48, 48, 49, 50, 50, 52, 52, 49, 47, 47, 47, 44, 41, 41, 39, 35, 36, 37, 38, 36, 33, 35, 37, 35, 37, 37, 35, 34, 34, 35, 35, 35, 30, 41, 47, 57, 55, 63, 64, 63, 60, 55, 50, 49, 49, 48, 49, 52, 52, 49, 48, 46, 38, 34, 31, 28, 28, 26, 24, 24, 26, 29, 29, 30, 30, 30, 31, 31, 30, 27, 26, 25, 24, 25, 25, 25, 24, 23, 24, 26, 26, 24, 26, 27, 26, 26, 26, 25, 25, 26, 27, 27, 27, 26, 25, 25, 26, 26, 28, 28, 28, 28, 27, 26, 26, 26, 28, 28, 26, 25, 26, 27, 27, 27, 28, 28, 27, 25, 23, 22, 22, 24, 25, 29, 29, 28, 28, 28, 28, 28, 29, 28, 29, 30, 32, 35, 37, 50, 59, 70, 70, 59, 51, 49, 46, 46, 45, 49, 43, 42, 42, 37, 44, 51, 52, 48, 46, 49, 52, 51, 51, 55, 57, 54, 55, 58, 59, 59, 59, 53, 42, 52, 55, 61, 61, 54, 49, 51, 60, 56, 51, 47, 48, 50, 49, 41, 39, 42, 46, 47, 42, 38, 39, 42, 45, 45, 45, 47, 45, 47, 49, 45, 39, 40, 46, 52, 56, 59, 58, 56, 56, 57, 55, 54, 51, 50, 55, 57, 52, 46, 49, 51, 53, 55, 59, 60, 53, 51, 50, 48, 46, 42, 45, 51, 52, 48, 45, 46, 43, 40, 40, 44, 48, 52, 49, 45, 42, 38, 36, 38, 37, 37, 41, 41, 45, 47, 48, 47, 48, 49, 47, 50, 51, 49, 48, 48, 47, 43, 37, 39, 41, 38, 36, 36, 36, 34, 31, 33, 36, 32, 34, 35, 35, 34, 33, 33, 33, 38, 35, 44, 45, 57, 56, 59, 51, 55, 57, 56, 52, 50, 50, 47, 43, 50, 54, 45, 46, 49, 41, 36, 32, 27, 27, 25, 24, 24, 27, 29, 27, 27, 28, 28, 29, 29, 28, 27, 26, 25, 24, 24, 25, 24, 22, 21, 22, 25, 25, 24, 26, 28, 28, 26, 26, 26, 26, 25, 26, 27, 27, 27, 26, 26, 28, 28, 29, 29, 28, 28, 27, 26, 26, 27, 28, 28, 26, 26, 28, 28, 28, 28, 30, 30, 28, 26, 24, 22, 22, 24, 27, 32, 32, 31, 28, 27, 26, 26, 31, 31, 32, 33, 37, 40, 42, 45, 45, 50, 52, 48, 46, 50, 62, 55, 49, 53, 48, 46, 47, 41, 42, 44, 46, 46, 47, 49, 52, 51, 49, 54, 58, 53, 60, 60, 54, 53, 58, 59, 51, 72, 72, 73, 70, 59, 50, 50, 55, 49, 46, 47, 48, 46, 43, 40, 38, 41, 47, 47, 40, 33, 34, 40, 44, 45, 44, 44, 41, 44, 49, 47, 42, 43, 50, 56, 58, 58, 57, 55, 53, 52, 46, 49, 51, 53, 59, 62, 58, 47, 38, 43, 49, 43, 44, 50, 50, 52, 57, 61, 56, 47, 45, 55, 60, 49, 49, 59, 56, 47, 46, 50, 56, 58, 54, 46, 44, 40, 39, 40, 38, 37, 41, 41, 45, 48, 48, 48, 48, 49, 45, 47, 49, 47, 47, 48, 48, 41, 34, 37, 41, 39, 35, 34, 34, 31, 27, 30, 33, 29, 31, 33, 34, 34, 33, 32, 32, 40, 40, 45, 43, 55, 54, 52, 46, 50, 54, 54, 55, 58, 59, 49, 42, 50, 53, 40, 42, 50, 46, 40, 35, 25, 27, 26, 24, 24, 27, 30, 28, 29, 28, 27, 31, 31, 29, 28, 27, 22, 21, 25, 25, 23, 21, 21, 26, 25, 21, 23, 28, 27, 28, 27, 25, 23, 27, 25, 26, 27, 26, 25, 24, 24, 28, 27, 27, 28, 28, 27, 27, 28, 27, 27, 28, 29, 28, 28, 28, 27, 28, 28, 29, 30, 28, 26, 24, 24, 25, 27, 29, 34, 34, 32, 30, 28, 26, 25, 32, 29, 30, 30, 37, 42, 49, 47, 45, 49, 54, 51, 44, 44, 62, 52, 46, 50, 49, 46, 47, 42, 39, 44, 44, 45, 50, 48, 49, 48, 46, 50, 57, 57, 63, 60, 49, 50, 62, 71, 65, 75, 66, 61, 60, 58, 52, 47, 52, 54, 56, 55, 50, 44, 42, 42, 42, 45, 48, 45, 37, 32, 33, 37, 41, 42, 41, 40, 38, 42, 47, 44, 41, 42, 49, 51, 53, 52, 53, 53, 48, 48, 45, 51, 52, 56, 61, 61, 54, 51, 49, 64, 67, 50, 49, 54, 49, 51, 56, 72, 77, 74, 68, 65, 64, 62, 53, 58, 55, 49, 54, 50, 58, 59, 61, 56, 53, 44, 38, 38, 37, 36, 38, 39, 42, 44, 45, 46, 47, 45, 42, 45, 47, 47, 46, 48, 46, 39, 33, 33, 39, 40, 36, 33, 35, 34, 29, 29, 32, 29, 29, 33, 35, 33, 30, 29, 31, 43, 40, 45, 43, 48, 53, 55, 52, 56, 55, 58, 65, 76, 84, 65, 48, 45, 48, 44, 45, 52, 51, 44, 36, 25, 27, 28, 25, 23, 25, 28, 31, 32, 29, 28, 34, 34, 29, 26, 26, 21, 20, 25, 23, 22, 23, 24, 28, 23, 18, 23, 28, 27, 28, 28, 25, 23, 28, 27, 29, 29, 28, 26, 25, 26, 28, 26, 26, 28, 30, 28, 27, 29, 28, 27, 28, 29, 31, 31, 28, 27, 27, 27, 29, 31, 28, 26, 26, 27, 29, 30, 32, 34, 35, 33, 32, 30, 28, 27, 32, 26, 28, 26, 37, 41, 52, 54, 56, 62, 69, 65, 50, 42, 50, 44, 41, 46, 48, 45, 46, 43, 38, 48, 45, 44, 49, 48, 47, 47, 46, 47, 52, 59, 59, 56, 49, 52, 64, 76, 71, 59, 53, 48, 48, 51, 50, 45, 54, 63, 68, 62, 51, 45, 44, 44, 47, 49, 47, 42, 37, 35, 34, 35, 37, 38, 39, 39, 38, 40, 44, 42, 38, 40, 45, 47, 50, 47, 52, 52, 44, 48, 50, 49, 50, 60, 60, 63, 73, 81, 86, 101, 89, 64, 64, 63, 49, 57, 59, 89, 99, 97, 88, 71, 63, 69, 51, 54, 53, 48, 59, 49, 54, 55, 65, 67, 59, 46, 36, 34, 33, 33, 34, 36, 40, 40, 40, 44, 45, 42, 41, 44, 46, 46, 46, 47, 45, 39, 35, 31, 35, 40, 37, 32, 37, 39, 33, 29, 31, 30, 29, 33, 35, 32, 28, 28, 33, 43, 38, 47, 47, 44, 52, 58, 63, 65, 59, 64, 73, 83, 96, 80, 65, 53, 50, 53, 51, 49, 49, 46, 40, 31, 28, 26, 26, 25, 23, 23, 33, 32, 29, 30, 37, 37, 29, 19, 22, 26, 26, 21, 20, 22, 26, 28, 23, 21, 23, 24, 27, 30, 29, 29, 31, 32, 29, 31, 33, 33, 32, 31, 31, 33, 28, 28, 30, 33, 34, 32, 30, 30, 29, 29, 29, 31, 32, 32, 30, 30, 30, 30, 31, 32, 31, 29, 29, 29, 29, 31, 32, 35, 36, 35, 33, 32, 31, 31, 37, 31, 35, 32, 41, 41, 50, 44, 46, 50, 55, 57, 53, 49, 44, 43, 45, 49, 50, 46, 48, 47, 41, 49, 44, 40, 40, 47, 52, 51, 48, 46, 47, 51, 50, 53, 53, 52, 50, 59, 65, 52, 65, 69, 57, 45, 44, 48, 52, 52, 50, 48, 45, 43, 42, 43, 45, 46, 44, 40, 36, 34, 35, 36, 38, 39, 40, 40, 39, 41, 44, 43, 41, 43, 48, 54, 58, 54, 58, 57, 48, 52, 52, 38, 49, 70, 61, 78, 129, 127, 119, 107, 79, 62, 70, 67, 58, 79, 84, 111, 105, 89, 70, 63, 68, 59, 49, 75, 77, 56, 59, 59, 55, 52, 60, 67, 57, 46, 38, 36, 34, 33, 35, 39, 40, 38, 38, 43, 47, 45, 43, 46, 48, 47, 46, 47, 48, 45, 39, 34, 35, 38, 33, 31, 37, 39, 33, 30, 31, 30, 28, 31, 34, 32, 31, 34, 39, 42, 40, 51, 54, 49, 51, 50, 65, 65, 60, 65, 67, 61, 67, 76, 82, 81, 70, 56, 49, 43, 39, 44, 46, 32, 27, 24, 28, 31, 29, 25, 30, 30, 33, 43, 57, 60, 52, 37, 34, 40, 37, 21, 19, 23, 22, 21, 26, 32, 30, 23, 26, 30, 32, 33, 30, 31, 39, 39, 38, 35, 30, 25, 23, 23, 30, 28, 28, 31, 33, 33, 32, 33, 33, 32, 33, 34, 35, 34, 30, 31, 33, 33, 33, 32, 32, 33, 32, 31, 31, 32, 33, 35, 36, 36, 35, 35, 34, 34, 40, 35, 41, 38, 43, 40, 46, 41, 44, 47, 48, 50, 51, 50, 40, 45, 51, 52, 49, 43, 45, 43, 38, 45, 43, 42, 44, 49, 51, 49, 46, 43, 41, 41, 47, 58, 64, 61, 45, 49, 65, 72, 63, 51, 44, 45, 51, 56, 54, 47, 42, 43, 45, 44, 40, 39, 39, 39, 37, 35, 31, 32, 36, 38, 39, 41, 41, 42, 41, 42, 45, 44, 43, 46, 50, 60, 65, 61, 62, 60, 52, 56, 51, 63, 74, 82, 73, 57, 67, 76, 62, 49, 53, 86, 110, 102, 76, 66, 73, 69, 47, 50, 55, 60, 61, 65, 57, 67, 61, 52, 51, 57, 51, 56, 60, 62, 54, 45, 40, 38, 34, 33, 37, 41, 40, 37, 35, 42, 49, 49, 45, 48, 49, 48, 47, 47, 48, 49, 43, 36, 36, 37, 34, 34, 40, 41, 38, 35, 35, 34, 30, 31, 33, 32, 32, 37, 43, 49, 41, 47, 50, 51, 61, 64, 67, 74, 69, 65, 61, 63, 76, 74, 69, 66, 66, 67, 66, 61, 52, 44, 32, 30, 25, 23, 27, 30, 30, 29, 36, 32, 32, 39, 44, 40, 33, 25, 23, 33, 42, 42, 48, 55, 43, 26, 28, 20, 14, 34, 53, 38, 29, 36, 29, 20, 26, 25, 26, 29, 29, 30, 31, 33, 32, 28, 26, 26, 29, 30, 31, 32, 32, 32, 33, 33, 34, 32, 29, 31, 32, 33, 32, 30, 31, 32, 32, 32, 32, 33, 34, 35, 35, 35, 35, 36, 36, 36, 33, 31, 39, 36, 40, 33, 36, 45, 47, 51, 54, 55, 53, 50, 45, 52, 55, 52, 45, 39, 40, 39, 38, 45, 41, 45, 52, 53, 49, 43, 46, 50, 48, 43, 53, 64, 69, 71, 50, 50, 66, 70, 51, 42, 51, 57, 44, 31, 55, 52, 51, 51, 49, 44, 40, 42, 41, 39, 39, 36, 34, 35, 37, 38, 40, 42, 43, 43, 42, 44, 46, 45, 44, 45, 49, 57, 62, 58, 60, 58, 50, 56, 50, 35, 52, 89, 85, 52, 64, 64, 48, 91, 134, 139, 150, 162, 109, 55, 71, 51, 47, 112, 120, 89, 62, 59, 74, 102, 108, 79, 56, 62, 57, 69, 62, 46, 49, 44, 41, 39, 34, 33, 37, 40, 41, 38, 37, 43, 50, 49, 47, 49, 49, 47, 46, 46, 47, 47, 42, 36, 37, 41, 39, 37, 39, 40, 38, 37, 36, 34, 34, 34, 33, 31, 31, 35, 40, 50, 39, 40, 42, 49, 62, 65, 60, 71, 73, 78, 80, 85, 96, 89, 72, 62, 65, 69, 67, 57, 50, 51, 47, 27, 27, 25, 24, 24, 26, 30, 39, 34, 33, 37, 37, 29, 29, 41, 35, 34, 40, 44, 40, 33, 32, 51, 71, 49, 27, 45, 62, 44, 31, 46, 56, 48, 35, 26, 28, 32, 34, 34, 36, 38, 35, 34, 33, 34, 33, 30, 27, 29, 29, 30, 30, 31, 31, 31, 30, 31, 32, 33, 31, 29, 30, 30, 30, 31, 32, 33, 35, 33, 33, 34, 35, 36, 36, 37, 39, 37, 47, 46, 49, 40, 42, 47, 47, 50, 57, 62, 58, 53, 50, 56, 57, 51, 43, 39, 40, 41, 48, 54, 43, 43, 49, 54, 50, 43, 50, 60, 60, 50, 56, 62, 62, 71, 55, 51, 59, 82, 70, 64, 66, 61, 47, 39, 56, 58, 58, 54, 48, 42, 41, 48, 45, 43, 43, 42, 39, 38, 38, 39, 41, 43, 44, 44, 45, 46, 46, 45, 43, 43, 45, 49, 54, 52, 53, 52, 47, 54, 51, 48, 57, 70, 59, 44, 70, 74, 110, 140, 150, 161, 152, 128, 88, 51, 65, 60, 58, 114, 129, 111, 80, 53, 71, 104, 95, 71, 54, 66, 67, 84, 76, 56, 47, 42, 41, 39, 34, 33, 38, 39, 41, 40, 40, 45, 49, 48, 47, 49, 49, 47, 45, 45, 45, 44, 41, 37, 37, 43, 44, 38, 36, 37, 38, 37, 34, 32, 37, 38, 36, 34, 33, 36, 40, 46, 39, 44, 46, 51, 60, 56, 69, 68, 71, 89, 92, 71, 61, 67, 69, 71, 71, 68, 61, 56, 53, 54, 48, 25, 31, 31, 26, 24, 31, 39, 39, 34, 35, 40, 39, 33, 31, 36, 35, 32, 38, 45, 35, 24, 32, 52, 60, 43, 27, 30, 39, 44, 42, 50, 68, 69, 46, 30, 32, 33, 33, 32, 34, 36, 40, 42, 46, 47, 42, 33, 26, 29, 30, 31, 31, 32, 32, 32, 32, 33, 33, 33, 32, 31, 29, 28, 28, 30, 32, 34, 35, 33, 32, 33, 34, 35, 36, 36, 34, 33, 43, 42, 45, 37, 38, 53, 47, 47, 54, 61, 58, 53, 51, 55, 55, 50, 44, 42, 40, 40, 55, 63, 48, 43, 44, 53, 52, 44, 52, 64, 64, 53, 56, 58, 51, 66, 57, 52, 52, 79, 71, 65, 58, 47, 43, 49, 57, 62, 61, 52, 44, 43, 46, 49, 46, 44, 44, 44, 40, 38, 38, 40, 42, 43, 44, 44, 46, 47, 46, 44, 42, 42, 42, 42, 47, 46, 48, 47, 43, 52, 47, 55, 49, 56, 84, 101, 118, 119, 134, 132, 113, 110, 105, 87, 83, 76, 53, 67, 61, 77, 78, 72, 66, 48, 63, 84, 69, 54, 49, 63, 62, 71, 65, 52, 44, 40, 39, 38, 35, 34, 38, 38, 42, 43, 43, 47, 48, 45, 47, 48, 48, 46, 44, 44, 44, 43, 41, 36, 36, 42, 44, 40, 36, 37, 39, 39, 36, 33, 39, 40, 38, 36, 37, 40, 43, 44, 41, 47, 49, 55, 65, 62, 67, 65, 73, 102, 114, 91, 71, 56, 62, 67, 69, 68, 67, 67, 69, 65, 54, 28, 37, 39, 33, 29, 39, 49, 41, 34, 35, 37, 35, 33, 29, 26, 30, 32, 38, 43, 32, 31, 42, 44, 39, 42, 43, 29, 21, 42, 53, 46, 57, 65, 45, 32, 32, 30, 29, 30, 34, 39, 43, 47, 52, 54, 47, 35, 28, 32, 33, 34, 35, 35, 34, 34, 33, 34, 33, 33, 32, 32, 29, 28, 28, 29, 31, 33, 35, 33, 32, 33, 34, 35, 36, 36, 32, 31, 41, 39, 42, 34, 36, 60, 51, 47, 51, 55, 52, 48, 49, 51, 52, 49, 46, 46, 41, 37, 53, 63, 50, 45, 42, 50, 51, 44, 50, 59, 59, 51, 53, 56, 43, 59, 56, 53, 47, 66, 60, 59, 54, 44, 42, 51, 54, 60, 59, 49, 42, 45, 50, 46, 42, 41, 42, 42, 37, 36, 38, 39, 41, 43, 44, 44, 47, 47, 45, 43, 42, 42, 41, 39, 45, 44, 46, 45, 42, 53, 55, 80, 83, 87, 109, 127, 139, 139, 107, 84, 71, 76, 95, 100, 118, 120, 57, 80, 74, 67, 60, 54, 64, 69, 80, 86, 79, 75, 77, 79, 67, 58, 51, 46, 43, 37, 35, 36, 35, 34, 37, 39, 43, 45, 44, 47, 47, 44, 46, 48, 48, 46, 44, 45, 44, 42, 40, 35, 34, 40, 43, 41, 38, 38, 42, 42, 38, 35, 38, 38, 38, 38, 40, 43, 45, 47, 44, 46, 46, 56, 74, 76, 76, 81, 89, 112, 126, 121, 115, 88, 76, 65, 62, 67, 74, 83, 95, 97, 92, 38, 45, 46, 37, 32, 40, 51, 47, 36, 30, 27, 23, 24, 29, 34, 39, 44, 46, 43, 39, 48, 60, 59, 61, 79, 83, 60, 35, 41, 48, 45, 50, 57, 50, 43, 38, 32, 28, 30, 38, 46, 44, 44, 45, 45, 41, 34, 30, 33, 35, 37, 37, 37, 36, 35, 34, 33, 31, 31, 31, 31, 30, 30, 29, 30, 31, 33, 34, 33, 33, 33, 34, 35, 36, 36, 42, 40, 48, 45, 48, 40, 43, 59, 56, 53, 53, 52, 48, 44, 46, 47, 48, 48, 47, 48, 43, 36, 45, 52, 45, 46, 45, 46, 48, 46, 48, 50, 50, 49, 48, 56, 40, 53, 51, 52, 45, 56, 53, 61, 67, 58, 49, 51, 45, 53, 54, 47, 42, 47, 51, 43, 39, 38, 41, 40, 34, 33, 37, 40, 41, 43, 43, 44, 46, 47, 45, 44, 43, 43, 42, 41, 47, 46, 47, 47, 45, 56, 82, 123, 147, 126, 80, 69, 94, 97, 66, 50, 66, 114, 145, 144, 153, 143, 91, 106, 95, 97, 99, 95, 98, 107, 117, 118, 124, 130, 132, 110, 86, 63, 56, 54, 44, 34, 31, 33, 34, 34, 35, 40, 44, 44, 44, 46, 46, 42, 46, 48, 49, 47, 45, 46, 44, 40, 38, 32, 32, 38, 42, 41, 37, 36, 42, 43, 37, 35, 35, 35, 35, 37, 40, 42, 43, 48, 46, 45, 41, 51, 73, 79, 93, 103, 104, 109, 114, 122, 138, 141, 113, 81, 59, 57, 66, 82, 105, 123, 134, 51, 56, 53, 39, 28, 29, 37, 46, 35, 30, 28, 29, 37, 47, 52, 58, 71, 75, 75, 86, 101, 107, 104, 96, 83, 68, 58, 60, 38, 30, 61, 88, 96, 100, 82, 70, 52, 35, 29, 31, 37, 43, 36, 29, 27, 29, 31, 32, 31, 32, 34, 35, 34, 33, 32, 32, 31, 28, 28, 28, 30, 31, 32, 31, 31, 31, 32, 32, 33, 34, 34, 35, 35, 36, 36, 34, 32, 38, 33, 36, 29, 31, 50, 56, 60, 62, 58, 51, 47, 44, 44, 47, 47, 47, 46, 46, 43, 40, 40, 36, 44, 46, 44, 48, 50, 48, 45, 46, 51, 44, 57, 41, 49, 46, 50, 45, 52, 47, 48, 47, 39, 40, 51, 34, 43, 49, 46, 43, 45, 48, 45, 42, 42, 43, 41, 36, 34, 38, 40, 41, 42, 43, 43, 46, 46, 44, 44, 44, 45, 44, 45, 52, 50, 51, 49, 47, 59, 101, 101, 76, 53, 49, 61, 64, 51, 60, 71, 90, 121, 118, 100, 96, 98, 123, 122, 72, 67, 66, 78, 85, 84, 110, 124, 117, 120, 122, 84, 70, 57, 62, 60, 44, 32, 28, 32, 34, 34, 34, 42, 45, 44, 43, 45, 46, 42, 46, 49, 50, 48, 47, 48, 44, 37, 35, 30, 31, 38, 43, 38, 31, 31, 38, 38, 33, 30, 32, 33, 33, 35, 38, 39, 38, 42, 44, 48, 41, 41, 54, 52, 48, 62, 70, 82, 92, 99, 118, 139, 133, 104, 61, 37, 44, 51, 52, 62, 65, 40, 76, 107, 108, 80, 41, 19, 40, 33, 30, 33, 51, 56, 48, 54, 58, 59, 51, 41, 35, 44, 66, 79, 61, 33, 31, 48, 52, 48, 47, 52, 54, 48, 40, 31, 24, 21, 23, 28, 27, 23, 32, 33, 34, 34, 35, 34, 34, 37, 36, 34, 33, 32, 32, 32, 32, 32, 32, 32, 32, 32, 34, 35, 34, 32, 31, 31, 31, 31, 33, 35, 34, 34, 36, 40, 43, 55, 55, 45, 42, 42, 38, 50, 58, 62, 59, 60, 47, 46, 41, 43, 49, 51, 48, 48, 50, 43, 47, 55, 39, 41, 47, 51, 55, 58, 50, 39, 44, 47, 40, 63, 51, 59, 60, 61, 52, 63, 65, 65, 56, 43, 45, 58, 48, 49, 51, 51, 50, 49, 48, 45, 46, 40, 29, 26, 33, 38, 39, 40, 41, 42, 43, 44, 46, 46, 45, 44, 42, 41, 40, 42, 47, 48, 45, 45, 43, 40, 52, 65, 63, 56, 59, 59, 51, 66, 55, 60, 71, 77, 59, 70, 52, 49, 38, 68, 65, 78, 63, 52, 54, 49, 58, 64, 53, 53, 61, 54, 46, 49, 51, 40, 35, 13, 29, 32, 30, 30, 28, 38, 40, 42, 42, 43, 42, 41, 44, 48, 49, 47, 46, 45, 44, 41, 34, 30, 28, 40, 40, 32, 32, 37, 37, 34, 34, 36, 35, 30, 31, 35, 36, 36, 40, 49, 36, 45, 39, 37, 47, 29, 57, 77, 83, 74, 71, 84, 97, 109, 118, 77, 76, 67, 58, 59, 51, 35, 32, 48, 53, 59, 67, 76, 78, 70, 40, 38, 44, 49, 61, 62, 50, 49, 47, 44, 43, 50, 60, 74, 77, 68, 71, 85, 84, 66, 64, 70, 71, 60, 43, 35, 35, 39, 35, 32, 35, 38, 36, 31, 32, 32, 34, 35, 35, 35, 34, 36, 35, 33, 32, 32, 32, 34, 35, 35, 35, 35, 35, 35, 35, 35, 35, 33, 34, 35, 35, 32, 33, 34, 33, 33, 36, 40, 51, 63, 63, 52, 49, 50, 45, 59, 57, 59, 57, 47, 42, 47, 47, 47, 49, 49, 44, 44, 44, 41, 51, 57, 45, 52, 53, 51, 56, 60, 48, 43, 52, 46, 45, 67, 57, 62, 58, 56, 51, 49, 46, 53, 53, 37, 39, 61, 49, 48, 48, 46, 45, 44, 43, 43, 42, 39, 33, 32, 35, 38, 38, 39, 40, 42, 44, 45, 47, 47, 46, 45, 43, 42, 41, 42, 47, 51, 50, 50, 48, 42, 49, 42, 56, 82, 86, 70, 60, 76, 101, 107, 96, 86, 73, 91, 96, 99, 87, 114, 111, 121, 116, 98, 79, 74, 79, 84, 88, 87, 85, 89, 96, 96, 86, 71, 62, 25, 29, 29, 29, 32, 31, 36, 37, 40, 41, 41, 41, 41, 47, 43, 44, 46, 43, 42, 43, 35, 34, 32, 32, 38, 36, 33, 38, 36, 34, 32, 33, 34, 37, 33, 32, 33, 31, 30, 34, 35, 33, 45, 38, 34, 47, 41, 47, 61, 64, 72, 88, 75, 53, 85, 101, 80, 97, 97, 99, 95, 73, 57, 52, 44, 39, 36, 47, 69, 85, 85, 58, 46, 46, 49, 57, 58, 51, 56, 61, 63, 60, 56, 53, 64, 67, 52, 50, 65, 69, 57, 52, 55, 53, 46, 37, 34, 36, 38, 36, 34, 34, 34, 32, 30, 31, 32, 33, 34, 34, 34, 33, 34, 34, 33, 32, 33, 33, 35, 36, 36, 36, 36, 36, 36, 34, 32, 33, 33, 34, 36, 37, 35, 36, 34, 33, 33, 36, 41, 51, 62, 62, 55, 55, 57, 53, 52, 43, 50, 58, 43, 48, 57, 52, 49, 49, 48, 43, 42, 39, 36, 49, 52, 46, 58, 54, 45, 52, 57, 43, 43, 55, 41, 36, 54, 48, 53, 47, 45, 48, 44, 36, 43, 49, 39, 37, 50, 50, 48, 46, 44, 42, 42, 41, 38, 36, 35, 37, 38, 35, 35, 36, 38, 40, 42, 45, 46, 47, 48, 46, 45, 43, 42, 42, 36, 42, 47, 48, 49, 47, 41, 55, 38, 46, 80, 104, 98, 83, 84, 115, 116, 105, 101, 108, 119, 117, 117, 100, 119, 123, 143, 143, 114, 83, 92, 118, 125, 122, 122, 114, 113, 121, 116, 107, 113, 101, 48, 37, 31, 32, 33, 31, 34, 36, 38, 40, 41, 41, 41, 43, 45, 46, 44, 41, 46, 46, 36, 35, 41, 31, 39, 30, 35, 41, 36, 33, 35, 37, 38, 36, 33, 33, 35, 34, 32, 35, 36, 34, 36, 35, 37, 41, 33, 48, 53, 54, 73, 103, 95, 66, 66, 74, 64, 82, 79, 89, 91, 79, 71, 73, 36, 39, 41, 48, 63, 75, 78, 68, 54, 58, 61, 59, 51, 45, 57, 65, 69, 62, 47, 32, 37, 46, 42, 37, 41, 48, 47, 40, 35, 30, 31, 34, 35, 34, 32, 33, 32, 30, 28, 28, 28, 33, 33, 34, 34, 34, 34, 33, 33, 33, 32, 32, 33, 33, 35, 36, 36, 36, 36, 36, 36, 33, 30, 31, 32, 33, 36, 37, 39, 38, 36, 34, 35, 39, 42, 49, 57, 58, 54, 57, 61, 58, 52, 43, 52, 61, 44, 50, 59, 53, 48, 48, 47, 45, 45, 39, 33, 44, 45, 44, 55, 48, 39, 46, 51, 38, 39, 52, 37, 30, 41, 39, 47, 43, 41, 51, 50, 45, 44, 52, 58, 49, 34, 50, 48, 45, 44, 43, 44, 44, 38, 33, 33, 39, 41, 35, 33, 37, 38, 41, 43, 45, 46, 47, 46, 45, 44, 42, 41, 41, 34, 40, 45, 47, 49, 48, 42, 49, 41, 41, 62, 90, 92, 75, 83, 94, 87, 87, 84, 103, 106, 94, 95, 78, 90, 93, 112, 110, 89, 78, 91, 118, 127, 118, 117, 106, 103, 112, 106, 105, 124, 111, 51, 35, 31, 34, 34, 30, 34, 35, 37, 39, 41, 41, 40, 37, 49, 49, 41, 42, 47, 44, 39, 32, 48, 21, 41, 27, 34, 38, 35, 34, 36, 39, 40, 38, 36, 35, 36, 33, 30, 31, 42, 41, 35, 35, 40, 39, 33, 49, 57, 63, 72, 88, 101, 103, 86, 74, 63, 72, 57, 66, 69, 61, 59, 69, 52, 61, 64, 59, 60, 65, 67, 56, 52, 67, 71, 58, 43, 36, 44, 45, 45, 40, 33, 26, 27, 33, 39, 44, 51, 53, 47, 39, 34, 29, 29, 31, 32, 32, 31, 34, 35, 32, 29, 30, 32, 36, 36, 35, 36, 36, 35, 35, 32, 32, 32, 32, 33, 34, 35, 35, 35, 35, 35, 35, 35, 33, 33, 33, 34, 35, 37, 38, 40, 40, 37, 35, 37, 41, 44, 45, 49, 49, 48, 52, 55, 53, 54, 50, 55, 58, 46, 46, 53, 50, 45, 45, 48, 48, 50, 45, 35, 39, 41, 44, 48, 44, 38, 40, 45, 38, 37, 48, 42, 38, 40, 40, 49, 49, 44, 55, 54, 57, 50, 55, 76, 63, 22, 47, 45, 43, 43, 43, 46, 47, 41, 35, 35, 40, 42, 37, 36, 39, 40, 42, 43, 45, 46, 45, 45, 44, 42, 41, 39, 39, 38, 43, 47, 48, 50, 50, 47, 42, 44, 46, 52, 58, 56, 51, 86, 84, 75, 77, 57, 68, 66, 59, 69, 65, 77, 76, 82, 77, 80, 91, 85, 87, 98, 103, 100, 86, 79, 85, 85, 86, 98, 97, 38, 26, 27, 32, 34, 31, 34, 35, 37, 38, 40, 41, 40, 37, 49, 47, 40, 44, 44, 39, 41, 26, 44, 12, 41, 31, 31, 31, 36, 39, 39, 40, 41, 40, 38, 36, 35, 35, 37, 39, 57, 57, 43, 39, 44, 44, 47, 58, 81, 98, 86, 66, 85, 120, 117, 87, 79, 95, 82, 84, 80, 66, 61, 70, 101, 104, 96, 80, 67, 59, 52, 36, 38, 49, 42, 30, 37, 37, 29, 26, 25, 28, 33, 37, 33, 31, 35, 41, 48, 48, 37, 32, 37, 43, 37, 27, 28, 36, 36, 39, 40, 36, 32, 32, 36, 37, 37, 36, 36, 36, 36, 35, 32, 32, 32, 33, 34, 35, 35, 35, 35, 35, 35, 35, 35, 37, 38, 38, 38, 38, 39, 40, 41, 39, 35, 35, 38, 41, 43, 38, 37, 36, 36, 39, 41, 39, 36, 39, 41, 41, 48, 48, 54, 46, 41, 43, 47, 49, 51, 50, 40, 36, 42, 48, 42, 46, 44, 37, 43, 45, 41, 50, 57, 56, 50, 47, 52, 55, 46, 51, 42, 51, 47, 51, 69, 57, 18, 44, 41, 39, 39, 40, 42, 44, 43, 39, 38, 40, 42, 42, 42, 42, 43, 44, 44, 45, 45, 45, 44, 43, 42, 41, 40, 39, 39, 42, 42, 41, 44, 47, 45, 52, 44, 53, 58, 43, 44, 70, 116, 137, 134, 120, 83, 77, 68, 66, 84, 97, 120, 130, 134, 139, 142, 131, 100, 87, 104, 128, 129, 110, 84, 70, 70, 73, 73, 96, 40, 28, 28, 30, 32, 32, 35, 35, 36, 37, 39, 40, 42, 45, 41, 42, 42, 40, 41, 48, 47, 32, 34, 21, 39, 43, 32, 30, 45, 53, 51, 49, 52, 40, 35, 33, 39, 53, 72, 85, 94, 77, 48, 43, 55, 58, 56, 96, 130, 153, 131, 91, 82, 101, 101, 73, 86, 142, 152, 153, 150, 139, 117, 113, 42, 46, 52, 59, 63, 56, 43, 44, 73, 96, 77, 49, 44, 40, 30, 36, 43, 47, 42, 35, 31, 36, 39, 27, 14, 14, 21, 21, 25, 30, 31, 30, 32, 36, 34, 35, 35, 31, 26, 25, 27, 33, 32, 31, 30, 30, 31, 31, 33, 33, 33, 34, 35, 36, 36, 37, 37, 37, 37, 37, 37, 38, 38, 38, 37, 37, 37, 38, 37, 35, 34, 35, 38, 40, 41, 35, 33, 32, 37, 45, 50, 50, 71, 68, 56, 41, 49, 43, 50, 48, 42, 43, 47, 47, 48, 47, 41, 33, 39, 48, 40, 50, 48, 35, 43, 50, 45, 52, 65, 62, 53, 51, 52, 59, 48, 49, 40, 47, 51, 50, 48, 40, 30, 46, 44, 41, 38, 38, 38, 38, 39, 37, 36, 37, 39, 41, 43, 44, 44, 44, 44, 44, 44, 46, 46, 45, 44, 42, 41, 40, 36, 37, 35, 31, 34, 38, 38, 40, 31, 31, 34, 35, 50, 75, 120, 159, 159, 156, 162, 166, 154, 144, 149, 147, 150, 155, 154, 163, 157, 146, 153, 155, 144, 137, 143, 147, 128, 92, 83, 105, 127, 114, 51, 34, 30, 29, 32, 36, 35, 35, 35, 36, 37, 38, 40, 42, 36, 50, 46, 26, 53, 89, 73, 61, 35, 52, 38, 56, 42, 49, 72, 85, 86, 89, 96, 85, 73, 55, 41, 44, 58, 68, 81, 67, 52, 55, 78, 104, 115, 126, 144, 148, 145, 144, 126, 105, 119, 137, 137, 134, 104, 123, 137, 112, 76, 59, 53, 48, 43, 44, 50, 48, 39, 31, 44, 55, 45, 38, 38, 37, 43, 44, 49, 55, 57, 56, 59, 64, 67, 67, 66, 59, 46, 40, 36, 31, 33, 37, 35, 29, 38, 39, 38, 35, 32, 31, 31, 32, 31, 29, 28, 28, 29, 31, 35, 34, 34, 35, 35, 36, 37, 39, 39, 39, 39, 39, 39, 36, 35, 34, 34, 34, 34, 35, 36, 34, 35, 38, 42, 43, 42, 45, 41, 41, 50, 61, 67, 68, 49, 46, 46, 45, 46, 48, 57, 56, 48, 48, 51, 49, 47, 43, 39, 34, 34, 44, 39, 50, 49, 39, 45, 48, 44, 52, 58, 56, 54, 58, 55, 66, 58, 59, 58, 61, 61, 57, 53, 50, 50, 47, 46, 44, 42, 40, 39, 39, 36, 34, 34, 35, 36, 36, 38, 41, 41, 41, 42, 43, 43, 45, 46, 45, 44, 42, 41, 40, 42, 44, 43, 41, 43, 47, 46, 41, 50, 52, 48, 49, 51, 52, 79, 103, 102, 118, 163, 168, 157, 147, 161, 166, 160, 156, 146, 158, 157, 142, 137, 134, 140, 162, 152, 165, 171, 132, 100, 105, 124, 96, 32, 20, 24, 31, 37, 44, 36, 35, 35, 35, 36, 37, 38, 36, 40, 53, 46, 27, 60, 96, 78, 67, 42, 64, 41, 53, 28, 26, 44, 55, 58, 63, 71, 64, 58, 45, 33, 35, 45, 50, 39, 55, 67, 42, 28, 58, 84, 99, 106, 100, 107, 134, 135, 104, 73, 80, 85, 128, 130, 128, 129, 110, 80, 68, 74, 78, 75, 66, 58, 49, 42, 36, 38, 54, 76, 96, 89, 69, 69, 71, 75, 81, 83, 81, 82, 83, 77, 67, 62, 56, 46, 38, 36, 36, 35, 34, 35, 37, 39, 39, 38, 37, 36, 36, 35, 37, 36, 35, 34, 34, 35, 36, 36, 36, 35, 35, 36, 36, 37, 38, 38, 38, 38, 38, 38, 36, 34, 34, 34, 34, 35, 35, 36, 36, 37, 42, 47, 47, 45, 41, 33, 31, 39, 48, 52, 52, 58, 56, 67, 76, 63, 66, 72, 63, 55, 54, 56, 53, 50, 43, 41, 40, 33, 42, 41, 49, 52, 48, 52, 48, 46, 53, 48, 43, 46, 55, 47, 57, 51, 52, 52, 54, 45, 42, 54, 59, 48, 45, 46, 45, 45, 44, 43, 43, 42, 39, 39, 41, 39, 33, 33, 38, 39, 39, 41, 42, 43, 44, 44, 44, 42, 40, 39, 39, 41, 45, 45, 44, 46, 50, 48, 42, 42, 49, 50, 45, 53, 73, 99, 110, 111, 121, 146, 124, 113, 102, 112, 111, 98, 100, 100, 122, 129, 112, 97, 97, 103, 105, 100, 115, 128, 116, 111, 125, 144, 107, 39, 26, 32, 35, 35, 36, 38, 36, 35, 35, 35, 36, 38, 41, 40, 41, 42, 44, 49, 58, 54, 43, 39, 51, 42, 41, 32, 35, 42, 44, 44, 46, 51, 43, 44, 45, 43, 46, 50, 48, 37, 48, 78, 78, 75, 94, 91, 104, 123, 129, 128, 136, 141, 128, 101, 111, 100, 134, 134, 131, 136, 125, 108, 108, 74, 75, 70, 60, 55, 54, 54, 39, 35, 47, 74, 99, 97, 83, 82, 85, 85, 82, 80, 81, 80, 80, 77, 58, 45, 48, 43, 35, 34, 37, 34, 33, 38, 38, 37, 35, 34, 37, 39, 38, 33, 36, 34, 34, 36, 38, 38, 37, 35, 35, 35, 34, 34, 34, 36, 37, 38, 38, 38, 37, 36, 35, 34, 36, 39, 38, 36, 37, 39, 38, 38, 40, 43, 44, 44, 45, 33, 35, 40, 46, 54, 51, 62, 60, 71, 77, 67, 67, 63, 54, 50, 51, 53, 51, 48, 44, 44, 43, 33, 41, 43, 44, 51, 55, 58, 49, 47, 52, 45, 40, 45, 48, 40, 47, 45, 50, 43, 38, 32, 36, 46, 58, 51, 53, 54, 53, 48, 43, 42, 43, 41, 40, 40, 40, 40, 39, 38, 38, 39, 39, 41, 43, 44, 44, 44, 44, 46, 44, 41, 40, 37, 41, 44, 45, 46, 46, 43, 41, 42, 48, 61, 84, 100, 119, 121, 117, 126, 127, 143, 124, 124, 119, 123, 120, 111, 112, 115, 128, 135, 129, 117, 115, 106, 81, 77, 89, 94, 119, 127, 132, 119, 81, 41, 34, 36, 39, 40, 34, 40, 39, 39, 38, 39, 40, 42, 46, 43, 41, 45, 48, 58, 70, 69, 56, 58, 60, 52, 43, 42, 45, 45, 39, 40, 46, 53, 50, 51, 46, 51, 63, 61, 66, 52, 50, 69, 97, 121, 127, 121, 125, 140, 146, 148, 142, 149, 135, 122, 141, 136, 148, 147, 141, 143, 143, 133, 134, 71, 66, 58, 53, 52, 55, 57, 39, 35, 34, 45, 62, 69, 68, 71, 72, 68, 61, 63, 71, 70, 71, 78, 65, 51, 57, 49, 37, 33, 36, 35, 34, 40, 33, 36, 34, 33, 36, 40, 39, 33, 38, 36, 36, 37, 39, 37, 35, 34, 36, 36, 34, 34, 35, 37, 38, 37, 37, 35, 34, 33, 34, 35, 37, 42, 41, 37, 38, 41, 39, 37, 36, 37, 39, 42, 49, 38, 46, 50, 53, 66, 59, 53, 51, 56, 55, 57, 57, 46, 44, 45, 46, 47, 46, 43, 44, 46, 43, 35, 43, 45, 40, 46, 54, 58, 49, 47, 50, 48, 44, 48, 44, 42, 46, 44, 50, 36, 35, 38, 45, 43, 61, 61, 67, 68, 63, 52, 42, 40, 41, 40, 38, 36, 38, 41, 44, 43, 39, 39, 40, 41, 43, 45, 45, 44, 46, 51, 48, 43, 43, 35, 36, 41, 44, 44, 41, 38, 41, 50, 49, 62, 109, 122, 123, 105, 94, 118, 125, 146, 144, 150, 148, 145, 145, 147, 148, 148, 146, 150, 158, 156, 151, 133, 101, 93, 104, 101, 141, 141, 130, 91, 51, 35, 33, 35, 40, 47, 41, 42, 41, 41, 42, 43, 45, 45, 44, 44, 45, 50, 39, 68, 101, 92, 75, 71, 69, 58, 49, 47, 40, 41, 40, 41, 50, 61, 64, 64, 45, 49, 65, 62, 77, 58, 50, 50, 86, 119, 115, 120, 112, 117, 116, 126, 122, 135, 121, 117, 138, 149, 142, 141, 125, 124, 129, 122, 120, 79, 81, 80, 73, 61, 47, 40, 37, 43, 38, 36, 49, 57, 55, 54, 46, 44, 51, 61, 68, 67, 67, 76, 80, 72, 69, 58, 38, 34, 41, 39, 34, 39, 35, 37, 37, 37, 36, 37, 39, 40, 46, 46, 44, 40, 36, 34, 35, 37, 39, 39, 38, 38, 39, 40, 38, 37, 33, 30, 31, 34, 37, 36, 35, 39, 39, 36, 37, 38, 38, 37, 37, 38, 40, 42, 43, 40, 50, 50, 51, 60, 51, 47, 45, 48, 46, 50, 55, 48, 49, 47, 47, 48, 46, 43, 43, 45, 45, 40, 49, 49, 42, 42, 48, 55, 48, 47, 50, 47, 44, 46, 48, 48, 52, 44, 42, 31, 53, 64, 68, 69, 84, 70, 76, 73, 65, 55, 45, 40, 42, 44, 34, 32, 40, 46, 44, 39, 38, 38, 39, 41, 43, 45, 46, 46, 47, 51, 49, 43, 43, 36, 36, 37, 39, 40, 40, 40, 44, 49, 42, 42, 64, 59, 58, 63, 56, 91, 114, 129, 121, 119, 111, 105, 105, 112, 122, 129, 131, 135, 143, 143, 141, 132, 116, 108, 120, 120, 142, 133, 132, 113, 72, 35, 27, 35, 38, 41, 44, 42, 41, 40, 40, 43, 45, 45, 38, 41, 38, 49, 32, 53, 83, 70, 53, 48, 49, 48, 44, 44, 33, 38, 57, 50, 53, 62, 64, 68, 49, 44, 57, 62, 72, 62, 55, 55, 73, 91, 83, 76, 67, 81, 80, 89, 83, 104, 110, 118, 125, 132, 109, 103, 76, 88, 86, 87, 87, 43, 44, 43, 41, 38, 32, 30, 37, 34, 43, 44, 34, 55, 82, 83, 68, 61, 66, 65, 53, 49, 42, 39, 45, 41, 44, 44, 38, 38, 49, 47, 40, 44, 43, 36, 39, 41, 33, 25, 24, 28, 16, 24, 30, 30, 28, 30, 33, 32, 33, 33, 32, 33, 35, 36, 35, 37, 35, 33, 36, 42, 47, 42, 36, 37, 37, 36, 36, 36, 37, 37, 38, 40, 41, 42, 47, 51, 60, 55, 53, 55, 42, 48, 49, 52, 48, 52, 58, 50, 44, 42, 43, 47, 50, 49, 45, 41, 45, 41, 51, 50, 42, 45, 52, 59, 52, 48, 49, 45, 44, 45, 51, 50, 58, 48, 41, 40, 69, 97, 116, 120, 117, 84, 58, 51, 45, 43, 45, 48, 48, 42, 34, 34, 40, 43, 38, 35, 37, 39, 41, 43, 45, 46, 48, 47, 48, 52, 49, 43, 43, 42, 39, 38, 37, 39, 42, 44, 36, 45, 46, 42, 43, 20, 22, 72, 53, 63, 71, 79, 83, 91, 96, 115, 114, 98, 103, 131, 143, 136, 128, 118, 109, 107, 109, 104, 104, 92, 91, 82, 101, 109, 100, 46, 29, 40, 37, 35, 42, 42, 41, 39, 40, 42, 45, 46, 47, 52, 42, 52, 34, 44, 60, 50, 38, 41, 46, 53, 57, 46, 53, 71, 88, 89, 82, 87, 97, 91, 63, 61, 97, 124, 120, 128, 117, 106, 91, 89, 97, 95, 134, 140, 135, 152, 140, 140, 141, 149, 134, 137, 123, 127, 103, 131, 129, 137, 140, 45, 38, 30, 28, 31, 36, 39, 37, 65, 60, 40, 40, 36, 27, 31, 36, 53, 74, 78, 66, 52, 43, 52, 63, 56, 50, 42, 29, 25, 34, 36, 31, 36, 36, 37, 44, 52, 51, 43, 40, 43, 51, 57, 59, 55, 47, 41, 39, 40, 41, 40, 39, 39, 41, 40, 38, 45, 48, 50, 54, 60, 62, 53, 41, 39, 38, 36, 34, 35, 37, 38, 40, 41, 40, 40, 38, 46, 50, 47, 48, 46, 31, 40, 46, 51, 44, 45, 49, 40, 39, 38, 39, 45, 48, 49, 44, 37, 40, 37, 48, 48, 41, 42, 46, 51, 46, 44, 45, 44, 46, 46, 51, 47, 55, 50, 49, 78, 77, 74, 64, 47, 71, 87, 82, 64, 46, 40, 42, 45, 42, 36, 43, 46, 42, 37, 35, 36, 38, 42, 45, 47, 48, 48, 49, 47, 48, 51, 48, 44, 44, 47, 46, 44, 43, 45, 48, 51, 46, 46, 44, 41, 51, 48, 61, 47, 85, 134, 149, 157, 139, 135, 128, 140, 145, 145, 150, 158, 153, 139, 129, 125, 123, 127, 136, 147, 144, 131, 123, 115, 128, 133, 102, 49, 32, 42, 39, 37, 43, 43, 41, 40, 40, 43, 47, 48, 42, 45, 35, 39, 39, 49, 63, 115, 119, 146, 143, 127, 121, 75, 108, 140, 135, 152, 141, 144, 146, 128, 97, 87, 121, 146, 123, 127, 135, 148, 128, 116, 130, 126, 141, 136, 120, 135, 116, 97, 94, 142, 152, 156, 135, 115, 124, 151, 139, 148, 150, 41, 37, 34, 37, 42, 45, 46, 44, 48, 52, 43, 33, 43, 58, 63, 66, 70, 69, 59, 45, 40, 47, 63, 68, 60, 57, 47, 33, 26, 32, 38, 37, 42, 41, 45, 45, 49, 49, 42, 37, 39, 37, 38, 40, 42, 42, 42, 40, 43, 44, 45, 42, 41, 42, 49, 60, 64, 66, 68, 73, 80, 73, 55, 42, 39, 38, 36, 35, 35, 37, 39, 41, 41, 39, 39, 36, 43, 43, 46, 53, 50, 38, 38, 45, 49, 41, 43, 48, 39, 43, 41, 41, 42, 43, 43, 42, 39, 40, 35, 46, 48, 43, 42, 43, 48, 48, 50, 56, 60, 45, 45, 50, 45, 48, 45, 49, 56, 47, 64, 98, 101, 97, 77, 88, 68, 48, 42, 43, 42, 38, 39, 48, 49, 43, 37, 37, 38, 39, 42, 46, 48, 49, 50, 49, 47, 47, 50, 48, 44, 44, 48, 47, 46, 46, 47, 49, 50, 49, 49, 45, 39, 44, 40, 62, 94, 127, 148, 144, 168, 153, 159, 160, 159, 156, 157, 162, 160, 152, 143, 139, 144, 148, 147, 150, 143, 124, 104, 75, 61, 70, 77, 71, 40, 32, 39, 41, 45, 47, 44, 42, 42, 42, 45, 48, 50, 50, 50, 48, 48, 72, 90, 45, 58, 85, 148, 154, 131, 132, 76, 102, 136, 132, 145, 145, 145, 148, 144, 131, 113, 127, 143, 120, 130, 136, 151, 132, 123, 144, 139, 146, 144, 129, 135, 114, 99, 92, 134, 147, 147, 154, 125, 151, 159, 154, 158, 158, 70, 70, 73, 80, 86, 87, 87, 96, 89, 72, 58, 63, 81, 89, 82, 78, 68, 53, 42, 36, 35, 42, 56, 52, 44, 51, 47, 41, 33, 38, 47, 48, 51, 49, 47, 43, 48, 57, 61, 64, 71, 64, 55, 46, 43, 43, 42, 40, 41, 43, 45, 43, 41, 40, 47, 58, 53, 50, 49, 55, 62, 61, 49, 38, 37, 37, 36, 36, 36, 37, 39, 41, 41, 40, 39, 41, 46, 43, 48, 54, 49, 46, 37, 44, 45, 38, 45, 52, 42, 46, 47, 46, 43, 42, 43, 45, 43, 42, 35, 45, 50, 46, 45, 44, 47, 49, 52, 59, 67, 39, 43, 47, 44, 42, 38, 44, 39, 51, 70, 88, 85, 80, 54, 64, 51, 41, 43, 46, 43, 40, 44, 43, 42, 40, 38, 38, 38, 39, 41, 44, 46, 48, 48, 48, 46, 46, 49, 47, 44, 45, 44, 44, 45, 45, 45, 45, 45, 44, 47, 46, 42, 49, 48, 75, 147, 157, 146, 134, 166, 149, 154, 160, 156, 147, 146, 159, 167, 164, 158, 154, 156, 158, 155, 153, 150, 129, 110, 61, 36, 39, 48, 48, 35, 34, 38, 43, 50, 46, 42, 42, 42, 43, 46, 48, 49, 47, 44, 47, 46, 80, 104, 40, 47, 69, 133, 132, 110, 123, 78, 76, 100, 122, 118, 131, 128, 123, 125, 121, 110, 123, 139, 129, 132, 121, 121, 107, 110, 137, 136, 139, 143, 138, 147, 130, 114, 93, 139, 127, 100, 123, 108, 156, 155, 152, 151, 150, 93, 94, 98, 105, 110, 107, 104, 109, 106, 86, 72, 79, 90, 88, 80, 74, 62, 52, 52, 60, 61, 63, 74, 70, 61, 66, 63, 58, 50, 57, 67, 66, 66, 63, 57, 49, 51, 61, 66, 71, 80, 77, 65, 51, 43, 40, 39, 39, 40, 44, 48, 47, 45, 42, 46, 49, 39, 31, 31, 35, 40, 43, 39, 34, 34, 35, 35, 37, 35, 36, 38, 40, 41, 42, 41, 44, 47, 42, 46, 47, 39, 47, 36, 42, 44, 39, 48, 55, 42, 46, 51, 51, 46, 42, 46, 49, 47, 44, 35, 45, 49, 46, 44, 41, 43, 42, 42, 47, 54, 31, 42, 41, 43, 39, 35, 43, 64, 81, 79, 61, 44, 52, 37, 45, 38, 37, 44, 48, 43, 40, 45, 38, 34, 36, 38, 37, 37, 39, 40, 42, 44, 45, 46, 47, 44, 44, 47, 46, 43, 45, 42, 42, 42, 42, 42, 42, 42, 42, 43, 41, 44, 68, 84, 115, 147, 140, 115, 112, 136, 121, 121, 123, 116, 111, 125, 150, 158, 151, 146, 142, 139, 141, 143, 140, 147, 130, 124, 71, 44, 37, 40, 43, 37, 38, 38, 42, 49, 40, 40, 41, 42, 44, 46, 47, 48, 45, 41, 42, 46, 69, 93, 39, 51, 58, 105, 94, 82, 103, 71, 49, 62, 113, 97, 113, 108, 102, 101, 90, 91, 111, 125, 126, 122, 108, 108, 105, 113, 137, 141, 128, 135, 142, 153, 144, 127, 74, 97, 100, 86, 109, 105, 149, 153, 153, 149, 147, 86, 87, 93, 102, 105, 98, 91, 84, 85, 90, 87, 75, 73, 79, 80, 76, 75, 79, 89, 97, 99, 96, 103, 108, 95, 86, 78, 67, 61, 71, 81, 75, 71, 67, 64, 53, 52, 55, 48, 43, 47, 51, 47, 42, 37, 35, 34, 36, 41, 47, 53, 54, 51, 49, 50, 48, 39, 34, 36, 37, 36, 35, 32, 31, 33, 34, 33, 36, 33, 33, 36, 39, 42, 44, 45, 39, 44, 40, 44, 37, 29, 49, 39, 48, 53, 50, 60, 59, 40, 48, 56, 57, 48, 42, 47, 50, 46, 42, 33, 42, 45, 41, 40, 37, 38, 36, 32, 33, 37, 27, 42, 32, 40, 39, 39, 51, 99, 93, 74, 55, 41, 47, 33, 48, 41, 39, 43, 46, 40, 36, 42, 39, 37, 37, 36, 36, 38, 40, 40, 41, 42, 45, 46, 45, 42, 42, 46, 46, 44, 46, 43, 42, 42, 42, 42, 42, 42, 42, 42, 35, 40, 80, 112, 141, 94, 86, 69, 90, 97, 97, 99, 97, 85, 87, 116, 138, 127, 106, 107, 115, 115, 119, 126, 125, 128, 107, 108, 66, 53, 46, 41, 50, 41, 39, 37, 38, 43, 35, 37, 39, 41, 44, 45, 45, 46, 49, 45, 43, 58, 56, 74, 36, 39, 45, 82, 72, 71, 87, 53, 38, 45, 109, 99, 101, 96, 103, 104, 86, 90, 107, 104, 109, 106, 112, 128, 133, 133, 144, 155, 123, 129, 139, 141, 138, 131, 53, 35, 79, 111, 131, 130, 137, 152, 159, 157, 156, 75, 86, 107, 126, 132, 123, 116, 142, 145, 135, 122, 121, 121, 113, 101, 100, 104, 113, 114, 109, 97, 73, 63, 64, 49, 37, 36, 33, 31, 47, 55, 44, 36, 33, 34, 31, 41, 51, 46, 40, 44, 46, 51, 55, 50, 41, 36, 34, 34, 42, 50, 52, 50, 47, 44, 39, 36, 39, 44, 43, 35, 30, 30, 32, 35, 33, 31, 34, 31, 31, 34, 38, 42, 46, 49, 35, 45, 46, 52, 44, 38, 69, 54, 68, 79, 78, 83, 73, 47, 53, 63, 62, 47, 37, 41, 46, 41, 38, 30, 37, 39, 34, 42, 44, 46, 46, 42, 40, 43, 31, 43, 23, 36, 42, 49, 65, 68, 50, 47, 59, 49, 44, 29, 50, 40, 34, 37, 41, 40, 36, 38, 49, 52, 43, 36, 38, 42, 43, 42, 42, 43, 46, 47, 44, 41, 41, 45, 45, 43, 46, 48, 47, 45, 44, 44, 46, 48, 36, 44, 42, 39, 61, 69, 79, 50, 60, 69, 121, 118, 140, 149, 148, 150, 144, 140, 130, 102, 82, 98, 126, 136, 139, 138, 127, 133, 93, 71, 30, 46, 66, 75, 55, 36, 33, 34, 35, 39, 34, 34, 37, 40, 43, 44, 44, 42, 43, 42, 37, 65, 42, 56, 42, 52, 74, 118, 111, 106, 100, 43, 52, 61, 116, 125, 109, 104, 125, 144, 137, 138, 134, 108, 116, 110, 128, 144, 136, 117, 124, 152, 121, 129, 131, 111, 109, 132, 76, 82, 76, 90, 109, 137, 111, 134, 150, 151, 151, 40, 63, 56, 30, 2, 4, 49, 8, 3, 16, 128, 2, 24, 128, 2, 34, 128, 128, 12, 13, 10, 13, 10, 13, 10, 11, 12, 12, 13, 17, 21, 20, 20, 20, 21, 24, 25, 27, 27, 27, 28, 28, 28, 29, 29, 30, 29, 29, 29, 28, 28, 28, 33, 35, 35, 32, 26, 22, 17, 15, 17, 17, 21, 22, 18, 19, 25, 23, 23, 22, 20, 18, 18, 20, 22, 23, 25, 29, 28, 21, 16, 17, 25, 26, 24, 23, 24, 25, 27, 25, 18, 24, 29, 28, 23, 22, 23, 25, 29, 33, 35, 37, 39, 35, 30, 29, 29, 29, 29, 30, 32, 32, 30, 28, 27, 28, 30, 31, 32, 33, 31, 31, 31, 29, 27, 27, 26, 22, 23, 28, 34, 36, 38, 42, 44, 41, 37, 31, 29, 31, 32, 32, 32, 25, 39, 93, 153, 193, 208, 202, 194, 189, 195, 207, 211, 199, 182, 181, 189, 189, 190, 190, 191, 190, 190, 195, 198, 197, 195, 192, 191, 192, 198, 201, 199, 202, 199, 198, 199, 191, 195, 198, 198, 194, 189, 190, 188, 190, 196, 194, 192, 191, 192, 191, 189, 182, 184, 185, 183, 184, 181, 174, 157, 106, 37, 11, 13, 10, 7, 11, 15, 9, 13, 17, 17, 15, 14, 16, 19, 22, 17, 18, 19, 13, 9, 13, 10, 19, 20, 14, 9, 12, 20, 29, 35, 33, 22, 14, 16, 24, 30, 31, 34, 40, 43, 46, 49, 59, 80, 102, 167, 166, 152, 137, 105, 59, 43, 46, 37, 24, 20, 20, 22, 25, 27, 25, 25, 22, 18, 15, 17, 19, 19, 17, 15, 12, 9, 9, 7, 8, 9, 9, 9, 9, 13, 10, 11, 11, 14, 17, 17, 16, 15, 17, 19, 20, 22, 23, 23, 23, 24, 24, 25, 26, 28, 27, 27, 27, 27, 27, 27, 31, 31, 31, 30, 26, 23, 18, 16, 14, 15, 19, 19, 16, 15, 20, 23, 24, 23, 22, 20, 20, 21, 22, 22, 24, 27, 27, 21, 17, 18, 25, 25, 25, 24, 25, 26, 26, 26, 22, 25, 28, 25, 20, 18, 20, 23, 28, 31, 31, 31, 32, 27, 23, 30, 29, 29, 28, 28, 28, 28, 29, 29, 28, 30, 32, 32, 33, 33, 30, 30, 31, 29, 26, 25, 22, 21, 22, 26, 31, 33, 35, 38, 39, 35, 32, 28, 29, 32, 35, 36, 33, 25, 42, 97, 153, 191, 207, 204, 191, 186, 193, 206, 211, 201, 184, 182, 190, 190, 190, 190, 190, 189, 189, 196, 197, 197, 195, 193, 191, 193, 198, 201, 198, 200, 198, 197, 199, 192, 194, 197, 198, 193, 190, 190, 189, 190, 195, 193, 191, 191, 192, 190, 188, 181, 183, 184, 182, 183, 181, 173, 155, 100, 33, 13, 10, 13, 10, 6, 8, 9, 7, 9, 13, 10, 11, 13, 12, 12, 12, 14, 11, 13, 15, 11, 8, 13, 10, 13, 12, 9, 6, 7, 12, 18, 21, 16, 11, 9, 11, 15, 17, 14, 11, 11, 12, 13, 14, 19, 33, 48, 87, 81, 76, 86, 83, 51, 32, 34, 29, 19, 18, 20, 22, 23, 25, 25, 26, 23, 20, 17, 17, 20, 19, 15, 12, 9, 7, 6, 7, 7, 8, 8, 8, 8, 8, 8, 8, 11, 14, 13, 12, 12, 12, 13, 14, 17, 17, 17, 17, 18, 18, 19, 20, 23, 23, 23, 24, 24, 25, 25, 26, 26, 27, 27, 25, 23, 20, 17, 16, 16, 19, 20, 17, 16, 20, 23, 25, 25, 25, 23, 22, 23, 23, 22, 22, 25, 26, 22, 19, 21, 25, 25, 25, 25, 26, 26, 26, 26, 25, 26, 25, 22, 17, 16, 19, 23, 28, 30, 28, 26, 26, 22, 18, 26, 25, 24, 23, 22, 22, 23, 26, 28, 28, 30, 32, 32, 32, 33, 30, 31, 32, 30, 26, 23, 20, 20, 21, 24, 27, 29, 31, 34, 33, 34, 32, 28, 28, 31, 33, 34, 31, 24, 45, 100, 154, 188, 206, 206, 189, 184, 192, 204, 211, 201, 185, 183, 191, 191, 191, 191, 191, 189, 189, 197, 197, 197, 195, 193, 192, 194, 199, 200, 197, 199, 196, 196, 198, 192, 193, 196, 197, 193, 191, 192, 191, 192, 194, 192, 192, 192, 192, 190, 187, 182, 182, 183, 181, 182, 181, 172, 154, 96, 31, 13, 10, 11, 7, 6, 6, 6, 7, 6, 7, 11, 12, 9, 7, 9, 7, 8, 13, 10, 9, 7, 8, 7, 6, 6, 5, 5, 6, 8, 8, 4, 3, 5, 6, 7, 5, 3, 1, 1, 7, 13, 27, 23, 26, 54, 70, 50, 31, 25, 19, 14, 16, 20, 22, 22, 23, 24, 24, 23, 19, 17, 18, 20, 17, 12, 9, 7, 5, 5, 6, 6, 8, 8, 8, 7, 7, 6, 6, 9, 12, 11, 13, 10, 13, 10, 9, 9, 13, 10, 11, 11, 13, 13, 13, 14, 14, 14, 16, 17, 18, 19, 20, 21, 21, 21, 21, 22, 22, 22, 21, 19, 18, 19, 19, 21, 22, 22, 21, 23, 23, 24, 26, 26, 24, 23, 23, 23, 21, 21, 23, 25, 23, 22, 25, 26, 25, 26, 26, 27, 27, 25, 25, 25, 25, 23, 19, 17, 17, 20, 23, 27, 28, 25, 23, 23, 19, 16, 20, 19, 18, 17, 17, 18, 18, 23, 26, 27, 29, 31, 31, 30, 31, 32, 32, 32, 30, 26, 23, 20, 19, 20, 21, 24, 26, 29, 30, 29, 36, 33, 28, 27, 29, 29, 30, 27, 24, 47, 103, 156, 187, 205, 206, 188, 183, 191, 204, 211, 201, 185, 184, 191, 192, 192, 192, 192, 191, 191, 196, 198, 197, 195, 194, 194, 195, 199, 199, 195, 196, 194, 194, 197, 192, 192, 196, 197, 194, 192, 194, 194, 193, 193, 193, 193, 194, 194, 192, 187, 184, 183, 183, 181, 183, 181, 173, 154, 96, 32, 13, 15, 13, 10, 9, 7, 9, 9, 7, 8, 12, 14, 13, 10, 8, 9, 7, 7, 8, 6, 5, 6, 4, 4, 5, 6, 5, 3, 2, 1, 3, 3, 4, 3, 2, 1, 1, 1, 1, 1, 11, 43, 63, 48, 31, 19, 11, 13, 10, 14, 20, 21, 20, 22, 21, 20, 20, 17, 15, 16, 18, 15, 9, 7, 5, 4, 4, 6, 6, 9, 9, 8, 7, 7, 6, 6, 9, 12, 11, 13, 10, 9, 9, 9, 9, 9, 9, 13, 10, 13, 10, 13, 10, 11, 11, 13, 10, 13, 10, 11, 12, 13, 15, 16, 17, 16, 17, 17, 17, 18, 16, 15, 15, 18, 19, 21, 23, 24, 24, 26, 20, 21, 24, 24, 22, 21, 21, 21, 21, 19, 21, 23, 23, 23, 27, 25, 26, 27, 28, 28, 27, 25, 23, 22, 23, 21, 19, 18, 20, 22, 20, 22, 24, 22, 19, 20, 18, 16, 14, 14, 14, 14, 16, 16, 18, 21, 23, 25, 27, 29, 29, 28, 28, 33, 32, 31, 28, 25, 24, 22, 20, 19, 19, 21, 24, 28, 29, 28, 35, 32, 28, 27, 28, 28, 28, 27, 24, 47, 104, 158, 189, 206, 203, 189, 184, 192, 205, 211, 201, 185, 183, 190, 191, 192, 193, 195, 194, 194, 196, 199, 199, 197, 196, 195, 197, 199, 196, 193, 194, 192, 193, 197, 192, 191, 196, 198, 194, 194, 195, 196, 194, 194, 194, 195, 196, 196, 194, 189, 187, 185, 184, 181, 184, 183, 175, 155, 99, 35, 16, 19, 15, 15, 15, 13, 13, 14, 15, 16, 16, 13, 14, 14, 12, 11, 13, 10, 7, 5, 4, 4, 4, 6, 6, 5, 3, 1, 2, 9, 8, 6, 2, 1, 4, 4, 1, 1, 1, 2, 16, 44, 52, 38, 26, 16, 8, 8, 13, 19, 19, 19, 21, 16, 15, 14, 12, 12, 13, 14, 12, 8, 6, 4, 3, 4, 6, 7, 12, 12, 11, 13, 10, 13, 10, 9, 9, 11, 13, 13, 12, 12, 11, 13, 10, 13, 10, 13, 10, 13, 10, 13, 10, 13, 10, 11, 11, 11, 13, 10, 7, 8, 13, 10, 11, 13, 14, 15, 14, 14, 13, 13, 14, 12, 13, 10, 13, 10, 11, 13, 15, 18, 21, 23, 23, 16, 17, 20, 20, 19, 17, 17, 19, 20, 18, 19, 22, 22, 23, 27, 24, 25, 27, 30, 28, 27, 25, 22, 20, 22, 22, 20, 20, 20, 20, 11, 12, 15, 13, 11, 14, 16, 15, 15, 15, 15, 15, 16, 17, 18, 21, 23, 24, 26, 28, 28, 28, 28, 32, 30, 28, 25, 23, 24, 25, 21, 18, 19, 21, 24, 28, 30, 30, 28, 27, 25, 26, 29, 31, 32, 30, 25, 46, 103, 159, 192, 207, 200, 191, 186, 195, 207, 211, 201, 185, 183, 191, 191, 192, 194, 195, 195, 195, 199, 200, 200, 198, 198, 197, 198, 199, 193, 190, 193, 191, 192, 196, 191, 191, 196, 198, 196, 195, 198, 198, 197, 197, 197, 198, 199, 199, 196, 192, 191, 189, 186, 183, 187, 185, 176, 157, 101, 36, 16, 19, 17, 19, 21, 16, 16, 18, 19, 17, 16, 16, 18, 21, 20, 17, 14, 11, 13, 10, 8, 6, 6, 7, 5, 5, 5, 4, 6, 15, 13, 13, 10, 6, 3, 6, 11, 6, 1, 1, 2, 4, 5, 2, 2, 18, 42, 41, 28, 21, 17, 12, 11, 14, 17, 17, 19, 21, 13, 10, 9, 9, 9, 13, 10, 11, 13, 10, 13, 10, 8, 5, 4, 4, 5, 7, 8, 12, 12, 12, 12, 11, 11, 13, 10, 13, 10, 11, 11, 11, 11, 13, 10, 9, 9, 11, 11, 11, 11, 12, 12, 13, 11, 9, 13, 10, 11, 13, 14, 15, 16, 13, 12, 11, 11, 13, 10, 9, 8, 8, 7, 13, 10, 12, 15, 20, 23, 21, 13, 14, 16, 16, 15, 14, 15, 17, 19, 16, 17, 21, 21, 21, 23, 21, 22, 24, 26, 26, 24, 22, 20, 20, 21, 21, 21, 18, 17, 16, 8, 9, 13, 11, 13, 10, 15, 19, 19, 18, 17, 16, 16, 15, 16, 16, 23, 26, 26, 27, 29, 29, 30, 31, 29, 27, 26, 23, 21, 23, 24, 21, 20, 21, 24, 24, 27, 31, 33, 29, 28, 26, 27, 29, 30, 30, 30, 25, 44, 102, 158, 192, 205, 198, 193, 187, 194, 207, 212, 201, 185, 186, 196, 196, 195, 194, 194, 193, 192, 199, 201, 201, 199, 199, 199, 200, 199, 191, 189, 193, 191, 192, 194, 189, 191, 196, 199, 197, 197, 199, 201, 199, 199, 198, 199, 200, 201, 199, 195, 193, 191, 187, 184, 188, 187, 178, 156, 96, 33, 15, 20, 19, 21, 22, 16, 17, 20, 21, 17, 14, 16, 20, 23, 23, 20, 17, 18, 18, 16, 14, 12, 11, 13, 10, 13, 10, 9, 11, 12, 16, 18, 19, 16, 13, 14, 16, 14, 12, 12, 14, 15, 13, 13, 10, 7, 2, 20, 45, 44, 33, 23, 19, 16, 14, 15, 15, 14, 16, 19, 13, 10, 7, 7, 9, 11, 11, 13, 10, 9, 8, 6, 5, 3, 5, 6, 7, 11, 11, 11, 12, 12, 12, 12, 13, 10, 13, 10, 13, 10, 11, 12, 11, 13, 10, 9, 11, 11, 12, 12, 12, 13, 13, 12, 11, 12, 13, 14, 15, 16, 17, 12, 12, 11, 13, 10, 9, 9, 9, 9, 9, 12, 13, 15, 21, 23, 20, 12, 12, 14, 14, 13, 12, 14, 17, 19, 15, 16, 20, 20, 18, 19, 17, 18, 20, 21, 22, 20, 18, 17, 19, 18, 18, 17, 17, 16, 15, 9, 11, 15, 13, 11, 16, 21, 22, 18, 17, 16, 15, 14, 14, 15, 24, 28, 26, 27, 28, 30, 32, 33, 29, 28, 28, 25, 23, 23, 23, 21, 22, 25, 26, 24, 25, 31, 35, 33, 31, 28, 27, 29, 28, 26, 28, 25, 46, 103, 157, 188, 203, 199, 191, 186, 193, 206, 212, 202, 186, 188, 199, 199, 198, 195, 194, 193, 191, 199, 202, 202, 200, 200, 200, 201, 198, 188, 188, 192, 192, 191, 193, 188, 191, 197, 200, 199, 198, 200, 201, 201, 200, 199, 200, 201, 202, 201, 197, 196, 191, 187, 184, 189, 188, 179, 154, 91, 33, 20, 27, 25, 24, 21, 18, 19, 21, 21, 18, 17, 18, 19, 22, 23, 20, 18, 20, 23, 21, 20, 18, 16, 14, 14, 15, 16, 18, 17, 22, 25, 25, 22, 20, 20, 17, 17, 18, 20, 20, 18, 15, 12, 3, 24, 45, 39, 29, 19, 17, 17, 16, 16, 15, 11, 12, 15, 8, 6, 6, 7, 13, 10, 11, 13, 10, 9, 9, 6, 5, 4, 3, 5, 5, 13, 10, 13, 10, 11, 12, 12, 12, 12, 11, 13, 10, 11, 13, 13, 13, 12, 11, 11, 13, 10, 12, 12, 12, 12, 12, 12, 12, 13, 14, 14, 15, 16, 16, 12, 12, 12, 13, 10, 11, 11, 12, 12, 12, 15, 14, 16, 22, 23, 17, 12, 11, 12, 12, 11, 11, 14, 17, 17, 14, 15, 18, 17, 15, 14, 14, 15, 17, 17, 17, 17, 15, 14, 17, 14, 12, 13, 15, 17, 17, 12, 15, 18, 15, 12, 16, 22, 24, 19, 19, 18, 17, 18, 18, 19, 26, 28, 26, 26, 27, 29, 32, 34, 31, 31, 32, 31, 27, 25, 22, 21, 25, 29, 29, 23, 23, 30, 36, 33, 31, 28, 28, 29, 28, 27, 27, 26, 48, 105, 155, 183, 201, 201, 187, 183, 191, 205, 211, 203, 188, 189, 200, 200, 199, 197, 196, 194, 193, 200, 202, 203, 201, 200, 200, 202, 197, 186, 187, 192, 192, 192, 192, 187, 192, 199, 201, 200, 199, 201, 202, 201, 201, 199, 199, 200, 202, 202, 199, 197, 192, 186, 184, 189, 189, 179, 153, 88, 35, 29, 39, 34, 29, 22, 22, 22, 22, 22, 22, 22, 20, 19, 21, 23, 19, 17, 21, 25, 23, 22, 21, 18, 16, 15, 16, 17, 18, 18, 21, 24, 25, 24, 23, 22, 20, 20, 23, 25, 24, 21, 19, 17, 1, 8, 34, 48, 33, 22, 16, 16, 17, 16, 17, 15, 9, 8, 11, 5, 3, 3, 5, 9, 13, 10, 9, 9, 9, 6, 4, 3, 2, 3, 4, 11, 11, 11, 12, 11, 12, 12, 12, 11, 12, 14, 15, 15, 14, 14, 13, 10, 13, 10, 11, 11, 11, 12, 12, 12, 12, 13, 14, 15, 15, 16, 16, 11, 11, 12, 12, 13, 13, 15, 14, 14, 15, 15, 17, 21, 21, 16, 12, 12, 12, 13, 10, 13, 10, 11, 13, 16, 15, 12, 13, 15, 15, 12, 11, 13, 14, 14, 14, 14, 13, 13, 12, 13, 13, 10, 8, 13, 10, 14, 18, 19, 16, 17, 19, 16, 13, 16, 20, 22, 21, 22, 22, 23, 24, 25, 25, 28, 28, 26, 25, 25, 27, 31, 33, 31, 33, 35, 35, 31, 27, 21, 21, 26, 30, 30, 24, 22, 27, 33, 27, 26, 25, 28, 31, 31, 30, 28, 25, 51, 107, 155, 181, 199, 202, 185, 181, 190, 204, 210, 203, 189, 189, 198, 199, 199, 198, 197, 196, 195, 201, 203, 204, 202, 200, 200, 202, 198, 186, 188, 192, 192, 192, 192, 188, 193, 200, 201, 201, 200, 202, 202, 201, 201, 199, 198, 200, 201, 202, 201, 197, 193, 186, 185, 189, 188, 179, 152, 85, 37, 34, 44, 41, 32, 23, 26, 26, 23, 24, 27, 26, 21, 18, 20, 23, 20, 17, 19, 23, 23, 21, 21, 18, 15, 14, 14, 15, 15, 15, 17, 19, 20, 20, 21, 22, 21, 23, 28, 28, 27, 25, 23, 21, 4, 16, 47, 53, 29, 17, 18, 18, 16, 15, 17, 15, 8, 5, 7, 2, 1, 2, 5, 7, 8, 7, 7, 7, 5, 3, 1, 2, 2, 4, 17, 16, 16, 14, 13, 12, 11, 12, 13, 12, 12, 13, 14, 16, 17, 11, 11, 11, 11, 11, 11, 11, 13, 10, 13, 10, 12, 14, 16, 18, 18, 18, 7, 9, 13, 15, 16, 13, 11, 13, 15, 13, 10, 13, 19, 21, 21, 24, 17, 15, 14, 13, 13, 13, 13, 13, 12, 13, 14, 13, 13, 14, 16, 15, 14, 13, 13, 13, 12, 13, 13, 13, 13, 10, 13, 10, 12, 14, 14, 11, 15, 15, 12, 14, 18, 20, 18, 15, 19, 20, 21, 24, 25, 26, 26, 28, 32, 33, 32, 26, 23, 26, 30, 27, 26, 29, 30, 31, 30, 23, 19, 20, 23, 27, 28, 27, 25, 23, 20, 20, 23, 29, 30, 26, 26, 26, 25, 52, 112, 162, 185, 198, 196, 189, 188, 195, 205, 208, 202, 189, 187, 197, 200, 197, 195, 200, 201, 194, 201, 207, 207, 202, 198, 201, 201, 197, 191, 191, 191, 191, 190, 191, 194, 195, 200, 204, 207, 204, 202, 201, 200, 201, 200, 199, 199, 200, 203, 204, 201, 195, 191, 190, 190, 184, 176, 150, 80, 34, 23, 25, 32, 31, 23, 26, 26, 25, 26, 25, 22, 18, 16, 17, 23, 26, 22, 18, 20, 26, 24, 23, 23, 16, 13, 15, 17, 14, 11, 16, 20, 19, 16, 16, 19, 22, 23, 26, 27, 26, 23, 21, 18, 7, 24, 56, 52, 20, 13, 10, 19, 21, 16, 11, 11, 11, 6, 4, 4, 2, 7, 13, 10, 9, 7, 5, 5, 4, 4, 5, 5, 1, 13, 10, 15, 15, 14, 14, 14, 13, 13, 14, 16, 15, 14, 14, 14, 15, 16, 12, 12, 12, 12, 12, 12, 12, 12, 12, 12, 13, 14, 14, 13, 13, 13, 10, 12, 15, 17, 16, 13, 12, 12, 14, 12, 17, 22, 23, 22, 25, 18, 17, 16, 14, 14, 14, 14, 14, 13, 14, 15, 14, 14, 14, 16, 13, 12, 12, 13, 15, 15, 15, 14, 11, 9, 9, 13, 10, 13, 10, 13, 10, 9, 14, 16, 16, 17, 17, 18, 18, 18, 18, 20, 22, 23, 23, 24, 25, 25, 27, 28, 29, 26, 25, 28, 30, 26, 26, 27, 27, 25, 23, 18, 17, 19, 23, 27, 28, 27, 25, 23, 24, 22, 24, 28, 28, 24, 24, 27, 29, 54, 113, 162, 187, 199, 197, 183, 184, 193, 204, 209, 203, 190, 190, 199, 202, 201, 199, 201, 202, 197, 200, 205, 204, 199, 198, 200, 201, 195, 188, 189, 190, 190, 191, 191, 194, 193, 198, 201, 203, 201, 200, 201, 202, 202, 201, 200, 200, 200, 202, 202, 202, 195, 190, 191, 191, 185, 176, 151, 80, 31, 19, 18, 26, 27, 20, 21, 22, 21, 20, 20, 18, 16, 15, 19, 26, 29, 26, 23, 24, 27, 22, 23, 23, 19, 18, 21, 21, 17, 13, 10, 15, 18, 16, 13, 14, 17, 18, 18, 21, 22, 22, 23, 23, 21, 6, 32, 68, 63, 31, 19, 23, 22, 16, 11, 13, 10, 9, 6, 6, 6, 4, 7, 7, 6, 5, 5, 5, 4, 4, 6, 2, 1, 9, 14, 14, 13, 14, 14, 14, 14, 16, 17, 17, 15, 15, 14, 15, 15, 13, 12, 12, 12, 12, 12, 12, 13, 14, 15, 15, 15, 15, 15, 14, 14, 15, 17, 17, 16, 14, 13, 13, 14, 16, 21, 25, 24, 22, 25, 20, 19, 18, 17, 16, 17, 17, 17, 16, 18, 18, 16, 15, 16, 17, 14, 13, 14, 14, 15, 16, 16, 14, 9, 9, 9, 9, 8, 9, 13, 10, 12, 15, 17, 17, 14, 14, 16, 18, 17, 19, 22, 21, 21, 22, 24, 23, 23, 24, 26, 26, 26, 28, 29, 27, 27, 28, 24, 20, 18, 16, 16, 19, 23, 27, 27, 27, 26, 24, 26, 24, 24, 27, 26, 23, 24, 30, 34, 58, 114, 163, 190, 201, 198, 179, 180, 189, 202, 209, 204, 191, 191, 199, 201, 202, 202, 201, 200, 200, 202, 204, 202, 198, 198, 200, 200, 194, 187, 188, 189, 190, 190, 190, 192, 192, 195, 198, 198, 197, 198, 201, 203, 202, 202, 201, 201, 200, 200, 199, 199, 195, 190, 191, 191, 185, 176, 150, 77, 27, 14, 13, 20, 23, 19, 20, 20, 20, 19, 19, 18, 18, 18, 21, 27, 31, 30, 27, 25, 25, 19, 20, 23, 22, 22, 25, 24, 20, 11, 15, 17, 16, 13, 13, 14, 17, 17, 18, 19, 21, 24, 25, 24, 7, 43, 76, 66, 36, 26, 25, 21, 15, 13, 10, 9, 9, 6, 7, 8, 1, 4, 7, 8, 7, 7, 7, 7, 5, 5, 6, 4, 1, 2, 7, 14, 14, 14, 14, 14, 15, 15, 16, 18, 17, 16, 15, 15, 15, 16, 13, 13, 13, 13, 13, 13, 13, 14, 15, 16, 17, 18, 18, 18, 18, 18, 19, 18, 16, 16, 15, 14, 13, 14, 18, 23, 25, 23, 23, 24, 22, 21, 20, 19, 18, 18, 19, 19, 19, 20, 20, 19, 17, 17, 18, 16, 16, 17, 17, 16, 16, 15, 13, 9, 13, 10, 9, 9, 9, 13, 10, 11, 11, 14, 17, 16, 13, 13, 15, 18, 16, 20, 22, 21, 19, 21, 24, 23, 22, 22, 24, 26, 27, 27, 26, 29, 30, 29, 24, 18, 17, 16, 17, 19, 22, 27, 27, 27, 26, 24, 27, 25, 24, 26, 26, 25, 27, 35, 39, 61, 115, 163, 192, 203, 197, 177, 177, 187, 201, 210, 206, 192, 191, 197, 197, 201, 202, 199, 196, 199, 204, 205, 201, 197, 199, 202, 201, 195, 188, 189, 189, 190, 191, 190, 190, 192, 193, 195, 195, 194, 196, 198, 200, 201, 202, 202, 202, 200, 198, 195, 196, 194, 190, 190, 190, 185, 175, 146, 73, 23, 12, 12, 17, 20, 19, 20, 20, 20, 19, 19, 18, 20, 21, 23, 26, 29, 30, 27, 24, 21, 17, 18, 21, 21, 23, 25, 24, 21, 13, 16, 18, 16, 14, 12, 13, 18, 20, 19, 20, 21, 23, 25, 23, 7, 49, 75, 58, 33, 27, 26, 21, 14, 9, 9, 13, 10, 7, 7, 9, 4, 6, 9, 13, 10, 9, 9, 9, 7, 5, 5, 6, 6, 3, 4, 7, 15, 15, 15, 15, 15, 15, 14, 15, 16, 16, 16, 16, 16, 16, 17, 14, 14, 14, 14, 14, 14, 14, 14, 14, 15, 17, 19, 20, 21, 21, 22, 22, 19, 16, 16, 14, 14, 14, 15, 19, 22, 22, 21, 22, 25, 22, 22, 21, 20, 19, 19, 20, 20, 21, 22, 21, 20, 18, 18, 19, 19, 19, 19, 19, 16, 15, 14, 13, 11, 13, 10, 9, 13, 10, 12, 13, 11, 14, 16, 17, 16, 15, 15, 16, 17, 18, 21, 23, 21, 20, 22, 26, 25, 23, 22, 25, 27, 27, 26, 25, 30, 32, 32, 26, 19, 18, 19, 19, 19, 22, 26, 27, 27, 27, 25, 28, 25, 24, 27, 28, 28, 31, 38, 41, 62, 115, 162, 192, 204, 196, 178, 176, 187, 201, 212, 207, 193, 190, 195, 193, 198, 200, 194, 191, 197, 206, 205, 201, 198, 201, 204, 202, 196, 191, 191, 191, 191, 192, 190, 188, 192, 194, 196, 195, 194, 194, 194, 196, 200, 202, 203, 202, 199, 195, 192, 194, 193, 190, 188, 189, 184, 173, 144, 71, 22, 12, 14, 18, 19, 19, 20, 20, 19, 19, 17, 18, 21, 23, 25, 25, 26, 26, 24, 21, 17, 17, 17, 18, 18, 21, 23, 22, 20, 16, 18, 19, 18, 15, 13, 13, 20, 24, 24, 24, 22, 22, 22, 19, 7, 51, 68, 44, 24, 24, 25, 19, 13, 9, 11, 12, 8, 6, 8, 8, 9, 11, 11, 13, 10, 13, 10, 9, 7, 4, 3, 6, 8, 5, 5, 8, 17, 17, 16, 15, 14, 13, 13, 12, 12, 13, 14, 16, 17, 17, 18, 14, 14, 14, 14, 14, 14, 14, 13, 12, 13, 15, 17, 18, 19, 19, 22, 21, 19, 16, 16, 14, 13, 14, 16, 19, 19, 18, 18, 21, 24, 22, 21, 20, 19, 19, 19, 19, 19, 21, 22, 22, 20, 18, 19, 20, 19, 19, 19, 19, 19, 16, 15, 15, 13, 9, 8, 12, 16, 15, 11, 18, 20, 17, 18, 20, 21, 19, 18, 21, 23, 24, 23, 22, 24, 27, 26, 24, 24, 26, 29, 29, 27, 26, 30, 32, 33, 27, 21, 20, 21, 20, 20, 22, 25, 26, 27, 27, 26, 31, 28, 26, 28, 29, 29, 32, 38, 41, 63, 114, 160, 189, 203, 194, 181, 179, 188, 203, 214, 209, 192, 189, 193, 191, 196, 198, 192, 188, 194, 203, 203, 201, 198, 202, 204, 201, 197, 196, 195, 194, 195, 194, 190, 185, 192, 196, 199, 198, 196, 192, 191, 193, 200, 201, 201, 201, 198, 193, 190, 193, 195, 192, 190, 189, 186, 174, 144, 73, 25, 16, 18, 20, 17, 16, 17, 18, 18, 18, 16, 16, 19, 23, 28, 25, 23, 22, 21, 19, 15, 19, 19, 15, 16, 19, 21, 21, 21, 19, 21, 22, 20, 18, 16, 15, 21, 25, 25, 27, 23, 21, 18, 14, 7, 51, 60, 32, 17, 21, 23, 18, 13, 12, 14, 15, 9, 5, 4, 9, 13, 10, 13, 10, 13, 10, 13, 10, 8, 6, 5, 3, 3, 6, 8, 5, 6, 9, 18, 18, 17, 15, 14, 13, 12, 11, 11, 12, 14, 15, 17, 18, 18, 14, 14, 14, 14, 14, 14, 14, 14, 15, 16, 17, 17, 17, 16, 16, 23, 21, 20, 18, 16, 14, 14, 14, 16, 17, 16, 15, 16, 21, 22, 22, 21, 20, 19, 19, 19, 19, 20, 20, 22, 21, 20, 18, 18, 20, 17, 16, 16, 17, 19, 20, 20, 20, 15, 11, 11, 15, 17, 16, 14, 24, 26, 22, 23, 26, 28, 24, 22, 26, 25, 24, 24, 25, 26, 28, 23, 22, 24, 28, 30, 31, 30, 30, 29, 30, 31, 27, 22, 21, 20, 19, 20, 22, 24, 26, 27, 28, 27, 35, 31, 28, 29, 29, 27, 29, 33, 38, 64, 115, 159, 187, 203, 193, 182, 180, 190, 205, 216, 210, 193, 188, 195, 193, 196, 196, 192, 191, 192, 198, 201, 200, 197, 199, 202, 200, 198, 199, 197, 196, 198, 197, 191, 186, 193, 195, 199, 199, 196, 192, 190, 192, 198, 200, 200, 199, 197, 193, 190, 194, 196, 194, 190, 190, 188, 175, 146, 78, 29, 21, 20, 19, 15, 14, 16, 21, 22, 20, 19, 19, 22, 25, 29, 27, 24, 22, 20, 19, 17, 23, 21, 16, 17, 20, 21, 21, 22, 22, 23, 23, 23, 22, 20, 18, 19, 20, 23, 25, 25, 23, 18, 14, 7, 52, 57, 29, 18, 21, 23, 21, 17, 15, 16, 16, 9, 3, 2, 7, 7, 7, 8, 8, 7, 5, 5, 5, 4, 5, 5, 4, 6, 12, 17, 17, 16, 15, 14, 13, 13, 12, 12, 13, 16, 17, 17, 17, 17, 13, 13, 13, 13, 13, 13, 13, 15, 17, 18, 18, 18, 18, 17, 17, 23, 22, 21, 19, 18, 16, 15, 14, 16, 17, 15, 14, 18, 20, 18, 23, 24, 23, 21, 21, 21, 21, 21, 20, 21, 22, 21, 20, 20, 22, 18, 16, 15, 16, 18, 22, 23, 23, 17, 17, 18, 20, 20, 20, 20, 26, 27, 25, 25, 26, 27, 25, 24, 27, 23, 21, 22, 25, 26, 26, 21, 21, 26, 30, 30, 30, 30, 31, 29, 29, 30, 27, 24, 23, 19, 18, 20, 21, 24, 25, 27, 29, 28, 34, 30, 28, 29, 28, 26, 27, 30, 36, 65, 116, 158, 186, 201, 194, 183, 181, 190, 205, 217, 211, 194, 187, 194, 195, 196, 195, 193, 192, 191, 194, 199, 200, 199, 198, 200, 198, 197, 199, 197, 197, 200, 199, 194, 187, 193, 194, 198, 198, 195, 191, 190, 192, 197, 198, 198, 198, 195, 192, 190, 192, 197, 194, 189, 189, 188, 174, 145, 79, 29, 21, 19, 17, 14, 15, 19, 24, 27, 26, 22, 22, 24, 26, 25, 24, 24, 24, 22, 20, 19, 24, 20, 16, 19, 22, 22, 21, 23, 27, 27, 28, 27, 27, 25, 23, 21, 21, 22, 23, 23, 23, 21, 18, 11, 53, 50, 22, 16, 21, 25, 28, 25, 20, 18, 15, 9, 4, 4, 5, 5, 5, 7, 9, 9, 6, 5, 5, 6, 6, 5, 3, 8, 16, 15, 15, 15, 15, 15, 15, 15, 14, 14, 15, 17, 18, 18, 17, 16, 13, 13, 13, 13, 13, 13, 13, 13, 14, 16, 17, 17, 18, 18, 18, 23, 23, 22, 21, 20, 18, 16, 15, 15, 16, 16, 16, 20, 21, 15, 24, 25, 24, 24, 23, 23, 24, 22, 20, 21, 21, 21, 20, 21, 23, 20, 17, 16, 15, 18, 21, 24, 24, 21, 26, 28, 25, 22, 23, 28, 26, 25, 26, 25, 23, 22, 23, 24, 26, 20, 17, 19, 23, 25, 23, 20, 23, 28, 31, 29, 27, 27, 29, 31, 30, 30, 29, 27, 24, 18, 17, 19, 21, 24, 25, 27, 29, 28, 31, 27, 27, 29, 28, 25, 27, 29, 34, 67, 118, 158, 186, 201, 195, 182, 180, 189, 205, 217, 212, 194, 186, 193, 196, 194, 192, 194, 193, 188, 193, 199, 203, 202, 199, 200, 198, 197, 197, 196, 197, 201, 201, 196, 189, 193, 193, 195, 195, 192, 191, 192, 194, 196, 197, 197, 197, 195, 192, 191, 190, 194, 193, 186, 187, 186, 172, 142, 77, 26, 18, 17, 15, 15, 20, 21, 26, 30, 29, 23, 23, 24, 25, 19, 22, 24, 24, 22, 21, 20, 22, 18, 14, 21, 25, 24, 21, 23, 30, 30, 31, 31, 31, 30, 27, 25, 25, 23, 24, 24, 24, 23, 22, 16, 52, 41, 12, 13, 10, 19, 28, 35, 32, 25, 19, 14, 8, 6, 7, 5, 4, 5, 8, 12, 13, 13, 10, 7, 7, 8, 8, 4, 2, 9, 20, 16, 16, 17, 17, 16, 16, 17, 16, 16, 17, 18, 19, 19, 18, 17, 14, 14, 14, 14, 14, 14, 14, 13, 13, 14, 15, 16, 17, 18, 18, 22, 23, 22, 21, 21, 19, 17, 16, 16, 17, 18, 18, 21, 20, 14, 24, 25, 24, 24, 24, 23, 23, 21, 18, 20, 21, 21, 21, 21, 22, 20, 19, 17, 17, 19, 22, 24, 24, 24, 30, 31, 26, 23, 25, 30, 24, 23, 25, 24, 21, 19, 21, 24, 26, 20, 17, 20, 24, 24, 21, 21, 25, 30, 30, 26, 22, 25, 29, 33, 31, 30, 31, 29, 25, 19, 20, 22, 23, 24, 25, 27, 28, 26, 26, 24, 25, 26, 26, 25, 27, 24, 27, 67, 123, 164, 186, 199, 195, 185, 182, 189, 203, 212, 208, 196, 190, 194, 197, 194, 192, 195, 193, 185, 195, 201, 203, 202, 200, 199, 197, 196, 196, 196, 197, 201, 201, 197, 190, 194, 195, 195, 194, 192, 193, 195, 195, 195, 196, 196, 195, 196, 194, 192, 190, 190, 189, 184, 183, 182, 168, 137, 74, 24, 14, 13, 15, 19, 25, 22, 26, 29, 28, 23, 22, 23, 23, 18, 21, 25, 26, 25, 23, 21, 22, 19, 17, 22, 26, 26, 23, 24, 31, 30, 29, 30, 29, 27, 25, 26, 28, 26, 25, 26, 24, 22, 24, 20, 49, 29, 4, 6, 14, 26, 35, 32, 24, 18, 12, 8, 8, 13, 10, 4, 6, 8, 11, 15, 14, 12, 13, 10, 8, 8, 6, 3, 1, 11, 24, 21, 22, 22, 22, 21, 20, 19, 18, 17, 19, 21, 22, 21, 20, 20, 15, 15, 15, 15, 15, 15, 15, 17, 19, 19, 18, 18, 19, 19, 20, 21, 19, 17, 17, 18, 18, 18, 18, 19, 20, 21, 20, 19, 17, 16, 23, 24, 23, 23, 23, 21, 18, 16, 17, 18, 21, 23, 24, 22, 20, 16, 17, 18, 22, 23, 26, 27, 25, 26, 27, 21, 17, 20, 23, 20, 22, 23, 23, 23, 23, 24, 25, 26, 26, 26, 25, 25, 26, 25, 22, 22, 26, 29, 26, 20, 18, 25, 32, 32, 28, 27, 29, 27, 25, 26, 30, 32, 28, 25, 26, 28, 27, 18, 22, 21, 23, 22, 23, 24, 25, 12, 12, 62, 134, 178, 189, 193, 193, 196, 190, 191, 197, 199, 198, 202, 203, 200, 198, 198, 201, 200, 193, 187, 201, 202, 199, 198, 196, 194, 192, 194, 197, 198, 199, 200, 198, 194, 191, 195, 200, 200, 198, 197, 199, 198, 195, 195, 198, 195, 195, 199, 199, 195, 192, 187, 185, 183, 178, 178, 161, 128, 72, 24, 11, 13, 10, 19, 27, 29, 26, 27, 28, 26, 24, 22, 23, 25, 27, 26, 29, 32, 32, 27, 25, 25, 27, 26, 25, 26, 31, 30, 28, 32, 28, 23, 20, 18, 15, 12, 17, 26, 28, 26, 28, 22, 17, 24, 17, 44, 15, 4, 9, 6, 14, 22, 21, 17, 11, 8, 7, 13, 10, 15, 4, 9, 13, 15, 12, 13, 10, 13, 10, 11, 13, 10, 5, 1, 2, 15, 30, 23, 23, 22, 22, 21, 21, 20, 19, 19, 19, 21, 21, 22, 21, 21, 17, 17, 16, 16, 16, 16, 16, 17, 18, 17, 17, 17, 18, 19, 20, 19, 18, 17, 17, 19, 20, 21, 19, 17, 19, 19, 19, 17, 16, 15, 18, 19, 20, 20, 19, 17, 15, 16, 19, 20, 21, 23, 25, 26, 26, 24, 23, 24, 26, 27, 29, 28, 27, 29, 30, 25, 19, 20, 21, 18, 21, 23, 22, 22, 23, 24, 25, 25, 23, 23, 24, 26, 27, 27, 25, 26, 27, 26, 24, 22, 22, 25, 27, 26, 23, 23, 26, 25, 23, 24, 28, 29, 28, 27, 25, 24, 24, 22, 23, 24, 25, 23, 23, 24, 26, 13, 12, 61, 132, 176, 190, 196, 198, 194, 189, 191, 198, 201, 202, 207, 206, 200, 199, 199, 200, 199, 194, 190, 201, 200, 197, 196, 194, 193, 191, 193, 198, 199, 200, 200, 198, 194, 192, 194, 199, 199, 196, 196, 197, 196, 192, 191, 195, 194, 193, 196, 196, 193, 192, 188, 186, 185, 179, 178, 161, 126, 69, 26, 17, 18, 24, 27, 26, 24, 25, 27, 25, 21, 19, 20, 23, 30, 29, 31, 34, 33, 28, 26, 25, 27, 27, 26, 26, 31, 30, 27, 35, 30, 23, 19, 17, 16, 16, 19, 26, 29, 28, 29, 23, 18, 26, 29, 48, 15, 5, 13, 12, 18, 22, 19, 16, 11, 8, 7, 13, 10, 14, 4, 8, 12, 13, 12, 13, 10, 13, 10, 11, 8, 5, 4, 4, 7, 17, 29, 23, 22, 20, 20, 19, 20, 20, 20, 19, 19, 19, 19, 20, 20, 21, 18, 17, 17, 16, 16, 16, 15, 16, 18, 17, 17, 17, 18, 19, 20, 18, 17, 17, 18, 19, 21, 22, 20, 16, 17, 18, 17, 17, 15, 15, 14, 16, 18, 18, 15, 14, 15, 17, 22, 21, 21, 23, 26, 28, 30, 25, 26, 27, 29, 30, 30, 31, 29, 30, 30, 26, 22, 22, 22, 19, 22, 23, 23, 22, 23, 24, 25, 25, 23, 23, 24, 26, 27, 27, 26, 29, 27, 23, 21, 24, 26, 25, 23, 24, 22, 24, 26, 24, 22, 23, 26, 27, 28, 31, 28, 21, 22, 26, 24, 26, 28, 25, 23, 24, 28, 15, 15, 64, 131, 173, 188, 196, 199, 193, 190, 192, 199, 203, 204, 208, 206, 200, 200, 200, 199, 197, 194, 193, 199, 198, 195, 194, 192, 191, 189, 193, 199, 200, 200, 201, 199, 195, 193, 194, 198, 198, 195, 194, 194, 192, 190, 190, 193, 193, 194, 195, 195, 193, 192, 189, 189, 187, 182, 179, 161, 124, 63, 24, 21, 23, 27, 27, 23, 25, 27, 28, 26, 23, 21, 21, 24, 33, 30, 31, 34, 32, 26, 23, 24, 27, 28, 27, 26, 30, 28, 25, 33, 29, 22, 16, 13, 14, 18, 18, 25, 29, 30, 30, 22, 18, 29, 40, 50, 15, 5, 15, 16, 19, 22, 19, 17, 13, 12, 13, 10, 12, 14, 5, 7, 8, 13, 10, 11, 11, 13, 10, 13, 10, 8, 2, 1, 6, 12, 23, 36, 23, 22, 20, 19, 19, 20, 21, 21, 20, 19, 18, 19, 20, 20, 21, 17, 17, 16, 16, 15, 15, 14, 16, 18, 17, 17, 18, 19, 20, 21, 17, 17, 17, 18, 18, 20, 21, 20, 16, 17, 17, 17, 17, 17, 16, 13, 16, 20, 19, 15, 14, 17, 20, 23, 23, 23, 23, 25, 28, 31, 24, 23, 26, 28, 30, 32, 33, 31, 29, 29, 27, 24, 24, 23, 21, 24, 24, 24, 23, 23, 24, 25, 25, 25, 24, 24, 26, 27, 26, 24, 28, 27, 21, 21, 26, 28, 26, 22, 27, 26, 28, 29, 26, 22, 22, 26, 26, 28, 35, 33, 22, 21, 28, 25, 27, 29, 26, 22, 23, 28, 17, 19, 67, 133, 173, 187, 194, 195, 194, 193, 194, 199, 202, 204, 207, 205, 200, 200, 199, 197, 195, 194, 195, 199, 198, 194, 192, 191, 190, 189, 193, 200, 200, 201, 201, 199, 196, 194, 194, 199, 198, 195, 192, 193, 191, 189, 190, 193, 194, 195, 196, 196, 194, 193, 190, 191, 190, 184, 181, 162, 123, 60, 22, 20, 24, 27, 26, 22, 25, 27, 28, 27, 24, 23, 23, 26, 33, 30, 31, 33, 29, 24, 21, 24, 26, 28, 27, 27, 29, 27, 23, 31, 29, 23, 16, 11, 13, 18, 20, 26, 30, 32, 31, 20, 17, 32, 49, 54, 18, 7, 17, 18, 22, 22, 20, 19, 17, 16, 14, 15, 16, 5, 4, 5, 8, 13, 10, 13, 10, 9, 13, 10, 8, 2, 5, 16, 30, 44, 24, 22, 20, 19, 19, 21, 22, 23, 21, 20, 19, 18, 19, 21, 22, 15, 15, 14, 14, 14, 14, 14, 15, 17, 17, 17, 17, 18, 20, 20, 16, 16, 18, 17, 16, 17, 19, 19, 17, 18, 18, 18, 18, 19, 19, 15, 18, 23, 21, 17, 17, 20, 24, 24, 25, 25, 24, 25, 27, 28, 22, 21, 24, 27, 30, 32, 33, 31, 27, 28, 27, 26, 26, 25, 24, 26, 26, 25, 25, 25, 26, 26, 27, 27, 25, 25, 25, 26, 24, 22, 25, 25, 21, 22, 26, 28, 27, 24, 31, 30, 33, 33, 28, 23, 23, 27, 26, 28, 38, 39, 28, 23, 28, 25, 27, 29, 26, 22, 23, 27, 18, 21, 72, 137, 175, 186, 191, 191, 195, 194, 195, 197, 200, 202, 204, 202, 198, 199, 198, 195, 193, 193, 195, 200, 198, 194, 192, 191, 191, 190, 194, 200, 201, 201, 201, 199, 196, 194, 195, 200, 199, 195, 192, 193, 191, 189, 190, 192, 194, 196, 197, 197, 195, 194, 191, 193, 192, 186, 183, 164, 125, 62, 23, 20, 21, 25, 24, 21, 23, 25, 26, 27, 25, 24, 25, 28, 33, 29, 30, 31, 27, 22, 19, 23, 27, 27, 27, 27, 29, 26, 22, 30, 29, 25, 18, 13, 14, 20, 22, 27, 32, 33, 30, 18, 17, 36, 56, 58, 24, 13, 18, 20, 25, 23, 21, 21, 20, 18, 17, 18, 19, 6, 4, 4, 6, 9, 13, 10, 7, 8, 7, 1, 1, 7, 20, 37, 51, 22, 21, 19, 19, 19, 20, 22, 23, 21, 20, 19, 18, 19, 20, 21, 13, 13, 13, 13, 13, 13, 13, 15, 17, 16, 16, 17, 18, 19, 19, 15, 16, 17, 16, 13, 13, 16, 18, 18, 19, 19, 20, 20, 21, 22, 18, 21, 25, 23, 20, 20, 24, 26, 24, 27, 27, 25, 23, 23, 25, 21, 21, 23, 27, 29, 30, 30, 30, 28, 27, 27, 26, 25, 24, 24, 27, 28, 27, 26, 26, 27, 27, 28, 26, 25, 25, 25, 26, 25, 22, 22, 23, 23, 24, 25, 26, 28, 28, 31, 32, 35, 35, 30, 25, 26, 29, 26, 27, 39, 45, 35, 26, 27, 25, 26, 28, 26, 22, 23, 27, 16, 21, 75, 140, 176, 188, 191, 188, 192, 193, 194, 195, 197, 201, 202, 199, 197, 198, 197, 194, 192, 192, 194, 202, 200, 195, 193, 192, 192, 191, 195, 201, 200, 200, 200, 199, 196, 195, 197, 201, 200, 196, 193, 194, 191, 189, 188, 189, 192, 195, 195, 195, 196, 195, 192, 194, 195, 189, 186, 166, 129, 69, 28, 21, 19, 21, 22, 20, 21, 23, 24, 26, 25, 26, 27, 30, 33, 29, 29, 30, 27, 21, 19, 24, 27, 27, 26, 26, 29, 25, 22, 30, 30, 27, 21, 16, 16, 20, 24, 29, 33, 32, 28, 15, 18, 41, 62, 61, 30, 18, 18, 21, 27, 23, 20, 20, 19, 17, 18, 18, 21, 8, 6, 5, 7, 13, 10, 13, 10, 7, 6, 3, 1, 5, 14, 25, 41, 53, 19, 18, 17, 17, 17, 19, 20, 20, 19, 18, 17, 17, 17, 17, 17, 14, 14, 15, 15, 16, 17, 17, 18, 18, 17, 17, 17, 17, 18, 18, 16, 18, 19, 16, 13, 12, 16, 19, 22, 22, 22, 22, 24, 25, 26, 21, 22, 24, 23, 21, 21, 24, 26, 25, 28, 28, 25, 22, 22, 23, 24, 26, 27, 29, 28, 28, 27, 27, 31, 28, 28, 26, 23, 20, 21, 27, 28, 27, 27, 26, 26, 27, 26, 23, 23, 24, 26, 27, 27, 25, 22, 22, 25, 26, 24, 24, 27, 29, 27, 28, 32, 33, 29, 27, 30, 30, 26, 27, 37, 44, 38, 28, 26, 26, 27, 25, 25, 24, 25, 28, 14, 20, 75, 140, 177, 190, 194, 191, 187, 190, 191, 191, 196, 202, 203, 200, 196, 197, 197, 196, 194, 193, 193, 203, 201, 196, 194, 193, 193, 192, 196, 201, 200, 199, 199, 198, 196, 195, 197, 202, 201, 197, 195, 195, 193, 189, 186, 186, 189, 191, 192, 193, 195, 196, 193, 194, 195, 191, 187, 169, 134, 76, 34, 24, 18, 19, 20, 20, 23, 27, 28, 29, 28, 30, 32, 33, 34, 30, 30, 30, 28, 24, 23, 24, 26, 26, 24, 26, 28, 26, 24, 27, 25, 23, 18, 14, 14, 18, 25, 30, 32, 30, 26, 13, 21, 48, 62, 56, 27, 15, 13, 18, 24, 20, 18, 17, 15, 14, 15, 17, 20, 12, 13, 10, 13, 10, 11, 12, 13, 10, 9, 4, 1, 9, 18, 26, 30, 40, 50, 17, 17, 17, 17, 18, 18, 19, 19, 17, 17, 17, 17, 16, 15, 15, 11, 11, 13, 14, 15, 16, 18, 18, 18, 17, 16, 15, 15, 15, 16, 15, 18, 20, 18, 14, 15, 18, 22, 23, 23, 23, 24, 26, 28, 30, 23, 22, 22, 21, 21, 22, 24, 25, 25, 27, 27, 23, 20, 21, 25, 26, 26, 27, 27, 27, 26, 25, 25, 30, 27, 25, 24, 20, 18, 21, 26, 27, 26, 25, 25, 25, 25, 25, 23, 23, 23, 26, 27, 27, 26, 23, 24, 26, 27, 24, 23, 25, 27, 24, 25, 29, 30, 26, 25, 31, 29, 25, 27, 32, 36, 33, 29, 27, 27, 26, 25, 25, 27, 29, 29, 14, 20, 76, 140, 176, 190, 196, 193, 186, 190, 191, 190, 196, 202, 203, 200, 198, 197, 198, 199, 198, 195, 192, 203, 201, 196, 193, 192, 193, 192, 196, 200, 199, 198, 198, 198, 195, 194, 197, 202, 201, 197, 195, 195, 193, 190, 186, 184, 187, 190, 190, 193, 197, 196, 193, 195, 193, 191, 189, 173, 134, 68, 29, 24, 20, 20, 20, 19, 26, 29, 32, 31, 29, 29, 31, 33, 32, 28, 28, 29, 28, 25, 24, 25, 26, 25, 22, 24, 29, 28, 26, 28, 24, 19, 16, 15, 16, 19, 25, 30, 29, 27, 22, 12, 25, 58, 67, 54, 22, 11, 11, 17, 23, 19, 16, 15, 12, 12, 14, 17, 20, 16, 17, 19, 18, 16, 12, 13, 10, 8, 9, 17, 27, 30, 31, 40, 50, 15, 15, 16, 17, 17, 18, 18, 16, 16, 16, 17, 16, 16, 14, 13, 8, 8, 11, 12, 14, 16, 17, 18, 19, 18, 16, 15, 14, 14, 14, 15, 19, 21, 20, 17, 17, 21, 25, 24, 24, 24, 26, 28, 30, 32, 25, 22, 20, 20, 21, 22, 22, 23, 25, 27, 25, 21, 19, 22, 28, 24, 23, 24, 25, 26, 25, 24, 24, 28, 23, 22, 23, 20, 19, 22, 26, 26, 25, 24, 24, 24, 24, 24, 25, 24, 24, 25, 27, 26, 23, 25, 26, 27, 27, 25, 23, 23, 23, 24, 25, 28, 28, 24, 23, 29, 25, 22, 26, 26, 25, 27, 29, 29, 29, 26, 25, 26, 31, 33, 31, 16, 24, 78, 140, 174, 189, 196, 193, 188, 192, 192, 190, 194, 200, 201, 199, 199, 198, 199, 201, 202, 197, 192, 203, 201, 196, 193, 191, 192, 192, 196, 200, 199, 197, 197, 197, 195, 194, 196, 201, 200, 196, 195, 195, 193, 191, 188, 184, 187, 191, 191, 194, 201, 198, 194, 195, 193, 190, 191, 176, 133, 56, 21, 20, 20, 21, 21, 19, 25, 28, 29, 29, 26, 24, 25, 27, 28, 25, 25, 28, 27, 24, 24, 25, 25, 24, 21, 23, 30, 30, 29, 34, 28, 21, 18, 19, 22, 25, 26, 28, 27, 24, 19, 12, 30, 66, 76, 54, 20, 11, 13, 22, 26, 20, 16, 13, 12, 11, 13, 18, 21, 19, 22, 24, 23, 18, 15, 12, 14, 18, 25, 30, 28, 28, 40, 54, 13, 14, 14, 14, 14, 15, 15, 15, 15, 15, 16, 15, 15, 14, 13, 7, 9, 13, 10, 13, 14, 14, 20, 30, 34, 24, 17, 16, 17, 17, 15, 16, 19, 22, 22, 20, 21, 26, 28, 25, 23, 23, 24, 25, 29, 35, 26, 21, 19, 19, 20, 20, 22, 25, 24, 24, 24, 22, 20, 22, 27, 19, 19, 21, 24, 25, 25, 25, 25, 25, 22, 22, 23, 21, 20, 23, 26, 26, 24, 24, 24, 24, 22, 21, 26, 26, 26, 27, 27, 25, 23, 26, 26, 26, 25, 24, 22, 21, 24, 26, 27, 28, 26, 23, 23, 29, 26, 23, 24, 20, 19, 24, 29, 30, 28, 26, 26, 28, 32, 34, 32, 17, 26, 81, 141, 174, 186, 194, 193, 192, 193, 193, 190, 193, 198, 199, 199, 200, 199, 200, 202, 202, 197, 193, 201, 201, 196, 193, 193, 192, 191, 196, 201, 200, 198, 197, 195, 194, 195, 196, 200, 200, 197, 195, 196, 193, 190, 188, 186, 189, 192, 192, 194, 200, 199, 196, 198, 194, 190, 191, 177, 132, 50, 18, 16, 17, 20, 22, 19, 23, 25, 25, 25, 24, 23, 22, 23, 26, 21, 21, 23, 25, 24, 23, 24, 25, 24, 22, 25, 32, 32, 31, 39, 32, 25, 21, 21, 24, 28, 26, 27, 24, 22, 19, 13, 10, 28, 67, 78, 50, 20, 13, 16, 25, 29, 21, 16, 15, 13, 13, 10, 12, 18, 22, 18, 21, 25, 24, 18, 13, 13, 20, 26, 29, 32, 27, 26, 38, 54, 13, 10, 14, 14, 13, 10, 9, 13, 13, 14, 16, 15, 13, 13, 14, 14, 16, 9, 13, 12, 15, 16, 12, 25, 55, 66, 39, 19, 16, 22, 22, 19, 19, 21, 23, 24, 25, 27, 30, 31, 26, 20, 21, 22, 19, 24, 38, 27, 19, 17, 20, 18, 17, 23, 27, 20, 19, 22, 26, 23, 21, 23, 15, 15, 20, 25, 24, 26, 27, 26, 22, 23, 24, 24, 23, 22, 21, 26, 27, 25, 25, 26, 25, 21, 18, 24, 26, 29, 29, 28, 27, 26, 25, 23, 23, 24, 22, 18, 21, 28, 28, 27, 26, 24, 24, 27, 30, 31, 27, 21, 18, 20, 26, 29, 30, 24, 26, 28, 29, 30, 32, 32, 17, 25, 82, 144, 174, 185, 192, 193, 194, 192, 191, 191, 194, 198, 201, 202, 201, 201, 200, 200, 199, 196, 195, 198, 203, 196, 194, 196, 192, 189, 195, 202, 202, 200, 197, 194, 194, 196, 198, 202, 200, 198, 198, 197, 192, 187, 185, 188, 190, 193, 194, 194, 194, 200, 199, 201, 196, 190, 187, 175, 132, 54, 23, 15, 14, 16, 24, 18, 20, 22, 23, 23, 25, 25, 24, 24, 25, 20, 16, 17, 22, 24, 21, 23, 26, 26, 26, 30, 35, 33, 30, 37, 32, 27, 22, 19, 21, 26, 23, 26, 22, 20, 20, 9, 21, 62, 72, 38, 19, 15, 17, 23, 27, 19, 17, 18, 13, 8, 11, 18, 22, 11, 15, 20, 20, 14, 13, 10, 14, 26, 31, 30, 33, 29, 26, 33, 48, 11, 16, 16, 13, 11, 13, 11, 12, 13, 12, 12, 12, 13, 14, 15, 8, 11, 11, 16, 18, 15, 25, 66, 92, 58, 27, 15, 19, 25, 28, 23, 23, 25, 27, 29, 30, 30, 30, 26, 21, 23, 25, 22, 23, 32, 21, 18, 20, 24, 22, 17, 18, 21, 21, 18, 20, 24, 22, 22, 25, 19, 18, 18, 21, 23, 25, 26, 26, 28, 28, 28, 27, 25, 23, 22, 28, 28, 27, 26, 26, 24, 22, 20, 22, 24, 26, 27, 28, 28, 29, 23, 19, 20, 24, 24, 21, 24, 29, 23, 24, 24, 23, 25, 30, 35, 33, 28, 23, 20, 20, 24, 27, 28, 25, 24, 25, 30, 32, 32, 31, 16, 25, 85, 148, 178, 188, 194, 193, 191, 190, 190, 190, 193, 199, 203, 202, 201, 200, 199, 199, 198, 195, 195, 200, 204, 196, 194, 197, 193, 190, 196, 201, 201, 200, 198, 195, 194, 196, 197, 201, 199, 197, 196, 197, 193, 188, 185, 187, 191, 192, 193, 195, 194, 199, 198, 200, 195, 189, 187, 174, 132, 56, 24, 18, 18, 18, 24, 21, 20, 20, 21, 22, 23, 23, 25, 24, 26, 25, 18, 16, 20, 22, 16, 20, 26, 27, 27, 31, 35, 32, 29, 36, 31, 27, 22, 19, 21, 26, 23, 25, 21, 18, 17, 7, 23, 63, 69, 36, 18, 16, 17, 23, 25, 18, 13, 11, 5, 4, 9, 14, 14, 8, 13, 17, 17, 12, 11, 18, 32, 35, 26, 25, 24, 23, 31, 45, 13, 10, 15, 17, 14, 12, 12, 9, 9, 11, 13, 10, 13, 10, 13, 10, 11, 13, 13, 13, 10, 12, 12, 17, 23, 19, 26, 56, 76, 54, 33, 25, 26, 28, 28, 24, 24, 25, 28, 30, 30, 29, 28, 26, 23, 25, 28, 24, 21, 25, 24, 23, 25, 28, 25, 21, 20, 23, 23, 19, 20, 21, 21, 21, 25, 24, 21, 17, 19, 22, 25, 25, 24, 25, 26, 26, 26, 25, 23, 21, 27, 30, 28, 27, 24, 22, 23, 22, 21, 22, 23, 25, 27, 29, 31, 24, 20, 21, 25, 26, 24, 26, 30, 21, 23, 23, 24, 26, 30, 35, 33, 30, 27, 23, 20, 20, 23, 25, 25, 24, 25, 28, 31, 31, 28, 14, 26, 87, 151, 182, 190, 195, 193, 191, 190, 189, 190, 193, 198, 202, 202, 200, 199, 199, 198, 197, 195, 194, 200, 204, 197, 194, 197, 193, 190, 195, 199, 200, 200, 199, 197, 195, 195, 197, 200, 197, 194, 194, 197, 194, 190, 188, 190, 192, 195, 196, 196, 196, 200, 197, 198, 194, 187, 186, 172, 131, 57, 22, 18, 22, 19, 22, 23, 21, 20, 19, 21, 21, 23, 25, 28, 36, 38, 29, 20, 22, 24, 19, 20, 24, 28, 28, 31, 34, 32, 28, 35, 31, 25, 21, 20, 22, 27, 25, 26, 23, 17, 16, 9, 30, 67, 65, 33, 17, 15, 17, 20, 21, 17, 13, 8, 2, 3, 13, 10, 15, 12, 8, 12, 16, 15, 11, 14, 25, 38, 34, 21, 19, 21, 24, 32, 46, 11, 16, 17, 13, 12, 12, 13, 10, 9, 11, 11, 12, 13, 14, 15, 16, 12, 14, 12, 18, 25, 21, 24, 37, 43, 37, 31, 29, 28, 26, 24, 22, 24, 26, 26, 26, 25, 26, 27, 26, 22, 25, 29, 26, 21, 21, 28, 28, 28, 27, 25, 23, 25, 28, 26, 23, 22, 22, 21, 22, 24, 27, 23, 17, 16, 21, 26, 26, 24, 21, 22, 24, 25, 24, 24, 23, 27, 30, 30, 27, 23, 21, 23, 25, 22, 21, 21, 23, 26, 29, 31, 27, 24, 24, 26, 25, 26, 28, 30, 22, 24, 26, 26, 26, 28, 30, 29, 28, 27, 24, 20, 17, 20, 23, 25, 26, 27, 28, 29, 30, 29, 16, 27, 87, 152, 182, 191, 196, 194, 193, 191, 189, 190, 192, 196, 199, 200, 199, 198, 198, 197, 197, 194, 193, 200, 205, 196, 193, 197, 193, 190, 195, 198, 200, 200, 200, 198, 196, 194, 197, 199, 196, 192, 192, 196, 195, 193, 192, 194, 196, 198, 199, 199, 199, 200, 196, 196, 193, 187, 185, 170, 129, 56, 19, 17, 23, 18, 20, 22, 21, 20, 20, 21, 21, 24, 26, 31, 43, 47, 37, 24, 23, 26, 21, 20, 25, 29, 29, 31, 33, 31, 27, 32, 29, 25, 21, 20, 22, 26, 26, 27, 25, 17, 13, 13, 40, 72, 63, 32, 17, 17, 19, 21, 19, 18, 16, 9, 2, 4, 11, 16, 15, 13, 10, 13, 16, 15, 12, 18, 30, 39, 31, 21, 19, 22, 26, 37, 52, 11, 15, 15, 11, 13, 10, 13, 13, 13, 14, 15, 15, 17, 18, 18, 19, 15, 17, 14, 19, 27, 22, 21, 24, 22, 23, 25, 25, 25, 24, 23, 21, 24, 27, 24, 21, 21, 25, 28, 25, 21, 23, 28, 27, 22, 21, 27, 29, 27, 24, 22, 24, 28, 29, 25, 25, 24, 24, 23, 23, 23, 27, 23, 17, 16, 22, 27, 29, 26, 21, 23, 24, 26, 26, 26, 26, 27, 28, 29, 25, 22, 20, 23, 26, 24, 22, 20, 22, 25, 28, 29, 29, 28, 25, 24, 23, 25, 28, 30, 22, 26, 29, 29, 27, 25, 24, 24, 25, 26, 24, 19, 17, 18, 22, 24, 28, 31, 30, 29, 30, 31, 19, 29, 88, 151, 180, 190, 196, 194, 195, 193, 190, 189, 191, 194, 198, 199, 199, 198, 198, 197, 197, 194, 193, 199, 204, 195, 192, 195, 192, 189, 195, 198, 199, 200, 200, 199, 195, 193, 197, 199, 195, 191, 191, 196, 195, 194, 195, 196, 199, 201, 201, 201, 200, 200, 195, 194, 192, 187, 184, 167, 126, 55, 17, 17, 23, 18, 19, 22, 21, 21, 22, 22, 22, 25, 28, 32, 40, 45, 36, 23, 22, 25, 21, 21, 25, 30, 30, 30, 32, 30, 27, 30, 27, 24, 20, 20, 21, 25, 27, 28, 26, 18, 11, 18, 50, 77, 63, 32, 18, 21, 23, 24, 20, 18, 17, 11, 3, 4, 13, 10, 18, 18, 12, 13, 15, 15, 14, 20, 33, 39, 32, 23, 21, 22, 26, 44, 66, 12, 14, 13, 9, 13, 10, 14, 17, 17, 18, 19, 20, 21, 22, 22, 22, 19, 22, 18, 20, 27, 22, 19, 22, 21, 21, 20, 19, 20, 23, 26, 21, 26, 29, 25, 18, 19, 26, 29, 24, 21, 22, 26, 26, 25, 24, 23, 25, 25, 23, 22, 24, 27, 26, 22, 24, 25, 25, 26, 26, 24, 26, 22, 18, 18, 23, 29, 32, 30, 24, 26, 27, 28, 28, 28, 27, 25, 26, 26, 24, 21, 20, 23, 27, 27, 23, 21, 22, 25, 27, 28, 28, 27, 23, 19, 20, 25, 28, 29, 22, 27, 31, 31, 28, 23, 20, 20, 22, 23, 22, 19, 18, 19, 24, 23, 31, 35, 33, 30, 29, 33, 22, 31, 88, 149, 178, 188, 195, 195, 194, 192, 189, 189, 191, 195, 198, 199, 199, 198, 198, 197, 197, 194, 193, 199, 202, 193, 190, 193, 190, 189, 196, 200, 200, 199, 200, 199, 195, 192, 197, 199, 195, 190, 192, 195, 196, 195, 196, 198, 200, 202, 202, 201, 200, 200, 194, 193, 190, 187, 184, 166, 124, 55, 18, 18, 24, 19, 20, 22, 20, 23, 23, 22, 23, 25, 29, 31, 28, 34, 28, 18, 19, 24, 22, 22, 26, 31, 30, 29, 30, 30, 27, 28, 26, 23, 20, 20, 21, 24, 27, 26, 26, 18, 8, 23, 59, 82, 63, 31, 19, 23, 26, 27, 21, 16, 15, 13, 10, 4, 2, 8, 17, 19, 11, 11, 14, 16, 16, 22, 32, 39, 37, 28, 21, 17, 24, 54, 87, 15, 17, 14, 13, 10, 12, 18, 22, 22, 22, 23, 25, 25, 26, 25, 25, 21, 26, 21, 21, 25, 21, 18, 22, 24, 23, 22, 20, 21, 23, 25, 22, 27, 31, 27, 21, 21, 28, 29, 22, 21, 22, 24, 26, 26, 26, 19, 23, 30, 30, 29, 29, 27, 22, 19, 23, 25, 27, 30, 31, 28, 25, 20, 19, 20, 25, 30, 33, 32, 27, 28, 27, 27, 26, 24, 23, 23, 24, 24, 24, 23, 23, 24, 27, 30, 25, 22, 23, 26, 27, 26, 24, 23, 19, 15, 17, 24, 28, 26, 21, 25, 29, 30, 28, 24, 21, 20, 20, 21, 20, 19, 20, 22, 26, 24, 32, 36, 35, 31, 31, 35, 25, 34, 89, 149, 177, 188, 194, 195, 191, 190, 188, 189, 192, 196, 199, 200, 200, 199, 198, 198, 197, 194, 194, 199, 202, 192, 189, 192, 190, 188, 196, 202, 200, 199, 199, 199, 195, 191, 198, 200, 196, 192, 192, 196, 195, 194, 196, 198, 199, 201, 201, 200, 199, 200, 194, 193, 190, 186, 183, 164, 122, 55, 21, 20, 25, 21, 23, 23, 20, 23, 25, 24, 22, 23, 28, 28, 16, 20, 18, 15, 18, 23, 27, 25, 28, 30, 29, 27, 29, 30, 28, 26, 24, 22, 19, 19, 21, 24, 25, 24, 25, 17, 7, 26, 67, 86, 59, 28, 17, 21, 25, 25, 18, 11, 11, 8, 1, 5, 14, 17, 9, 8, 12, 17, 20, 23, 28, 40, 42, 31, 20, 11, 23, 66, 110, 18, 21, 20, 16, 16, 21, 24, 24, 24, 25, 26, 26, 27, 26, 25, 20, 25, 20, 18, 22, 19, 18, 19, 18, 22, 25, 26, 24, 21, 19, 21, 24, 28, 29, 26, 26, 26, 25, 20, 23, 24, 25, 25, 25, 25, 22, 28, 34, 32, 31, 32, 29, 24, 22, 26, 26, 26, 29, 32, 29, 20, 18, 20, 22, 26, 28, 30, 29, 27, 28, 27, 25, 23, 21, 20, 21, 21, 22, 24, 26, 27, 26, 27, 30, 26, 23, 24, 27, 28, 26, 23, 23, 21, 17, 19, 25, 26, 22, 23, 25, 27, 26, 25, 24, 25, 22, 20, 19, 19, 20, 24, 25, 27, 26, 29, 32, 34, 35, 35, 36, 25, 36, 94, 153, 181, 189, 194, 192, 191, 190, 188, 189, 192, 196, 199, 201, 201, 200, 199, 199, 198, 195, 195, 200, 202, 193, 189, 193, 190, 189, 198, 204, 200, 198, 198, 198, 194, 191, 199, 202, 197, 193, 193, 196, 194, 194, 197, 199, 200, 201, 200, 199, 198, 200, 195, 191, 190, 187, 183, 163, 120, 52, 21, 19, 22, 21, 25, 22, 18, 21, 25, 24, 21, 20, 24, 26, 16, 14, 15, 18, 19, 22, 28, 26, 29, 31, 28, 25, 28, 30, 29, 25, 24, 21, 19, 19, 21, 23, 26, 26, 28, 20, 7, 33, 75, 89, 60, 29, 17, 22, 27, 27, 20, 13, 12, 6, 1, 3, 9, 13, 12, 7, 7, 12, 21, 27, 28, 28, 35, 38, 29, 20, 14, 29, 77, 128, 21, 24, 24, 20, 20, 23, 24, 24, 24, 25, 26, 26, 26, 24, 23, 18, 25, 20, 17, 20, 19, 19, 23, 23, 24, 26, 25, 23, 19, 17, 19, 21, 23, 28, 31, 29, 23, 19, 20, 25, 27, 26, 24, 24, 24, 25, 31, 33, 28, 26, 29, 29, 26, 28, 29, 26, 23, 26, 29, 27, 16, 17, 21, 23, 25, 25, 27, 27, 27, 29, 28, 27, 25, 24, 23, 22, 21, 21, 24, 29, 30, 28, 27, 29, 25, 23, 25, 29, 29, 27, 25, 26, 26, 22, 24, 27, 24, 18, 27, 27, 25, 23, 22, 23, 26, 25, 21, 19, 19, 22, 26, 27, 29, 28, 27, 27, 33, 38, 38, 35, 24, 37, 96, 156, 185, 191, 194, 191, 193, 192, 189, 189, 191, 194, 197, 199, 201, 200, 199, 199, 199, 196, 195, 200, 203, 194, 189, 193, 191, 190, 200, 206, 200, 198, 197, 197, 194, 190, 199, 203, 199, 194, 194, 196, 194, 194, 199, 200, 202, 203, 202, 200, 199, 201, 195, 191, 191, 187, 183, 163, 119, 49, 20, 18, 19, 20, 25, 19, 16, 20, 25, 24, 20, 18, 21, 23, 17, 12, 14, 18, 17, 17, 25, 26, 30, 31, 28, 24, 27, 30, 30, 24, 23, 21, 19, 19, 20, 23, 27, 28, 32, 25, 13, 10, 38, 83, 95, 68, 36, 24, 29, 34, 35, 27, 19, 14, 7, 3, 8, 16, 17, 12, 7, 6, 14, 27, 35, 34, 30, 29, 29, 25, 22, 22, 39, 87, 137, 21, 23, 24, 21, 21, 22, 22, 21, 22, 25, 26, 25, 24, 22, 21, 19, 22, 20, 20, 23, 21, 23, 26, 25, 26, 27, 26, 23, 22, 21, 20, 20, 22, 25, 29, 27, 22, 20, 21, 23, 24, 25, 26, 24, 22, 26, 28, 28, 24, 25, 28, 31, 32, 35, 33, 28, 25, 27, 29, 28, 20, 20, 24, 26, 26, 26, 26, 26, 28, 27, 26, 26, 26, 25, 24, 25, 23, 21, 25, 29, 29, 28, 28, 30, 25, 25, 28, 29, 28, 29, 27, 27, 27, 25, 25, 26, 22, 18, 28, 25, 22, 22, 22, 24, 26, 26, 24, 23, 23, 25, 27, 27, 28, 28, 26, 25, 30, 34, 35, 32, 23, 37, 97, 156, 183, 192, 192, 190, 193, 191, 189, 189, 191, 193, 195, 198, 200, 200, 199, 200, 199, 196, 194, 202, 204, 196, 192, 195, 195, 192, 198, 203, 200, 198, 197, 196, 194, 192, 200, 200, 196, 193, 194, 195, 194, 195, 200, 200, 201, 201, 200, 199, 197, 197, 193, 189, 192, 189, 185, 168, 118, 44, 21, 18, 21, 22, 27, 22, 20, 22, 25, 25, 24, 21, 20, 21, 22, 20, 21, 23, 21, 19, 23, 27, 29, 29, 28, 23, 23, 27, 29, 20, 20, 21, 23, 24, 26, 27, 31, 28, 30, 22, 13, 10, 48, 93, 93, 68, 40, 31, 35, 37, 36, 29, 23, 18, 13, 11, 13, 14, 13, 13, 10, 6, 7, 13, 20, 27, 28, 24, 23, 24, 25, 28, 38, 61, 103, 141, 20, 20, 20, 20, 20, 20, 20, 20, 22, 25, 27, 24, 21, 20, 21, 24, 20, 21, 26, 27, 24, 26, 26, 23, 26, 28, 27, 25, 26, 28, 22, 22, 23, 24, 25, 24, 24, 24, 24, 20, 19, 24, 28, 26, 22, 27, 25, 25, 25, 27, 28, 33, 36, 38, 35, 32, 29, 29, 30, 31, 27, 26, 27, 28, 28, 27, 26, 26, 28, 24, 24, 26, 25, 23, 24, 28, 24, 22, 25, 27, 25, 26, 31, 32, 26, 27, 31, 27, 25, 30, 28, 25, 26, 26, 25, 23, 21, 21, 27, 21, 20, 23, 25, 24, 25, 26, 27, 28, 28, 28, 27, 26, 27, 26, 26, 26, 26, 27, 29, 30, 23, 36, 97, 154, 178, 192, 189, 190, 191, 189, 190, 190, 193, 195, 196, 198, 199, 198, 199, 200, 199, 196, 193, 204, 204, 200, 196, 198, 199, 195, 194, 199, 199, 199, 198, 196, 194, 194, 200, 197, 193, 191, 193, 194, 193, 195, 201, 200, 198, 197, 196, 196, 194, 192, 193, 188, 193, 191, 185, 172, 117, 38, 21, 20, 24, 25, 28, 27, 26, 26, 26, 27, 29, 26, 21, 20, 28, 31, 31, 30, 27, 25, 23, 27, 27, 25, 27, 23, 19, 23, 27, 16, 19, 23, 27, 30, 30, 30, 33, 27, 25, 16, 13, 10, 60, 101, 83, 59, 38, 33, 38, 35, 32, 28, 23, 21, 20, 20, 15, 7, 7, 13, 10, 8, 12, 12, 13, 10, 14, 18, 17, 20, 24, 28, 37, 55, 84, 119, 144, 22, 21, 20, 20, 19, 20, 21, 22, 24, 25, 25, 23, 20, 21, 23, 31, 28, 27, 30, 28, 24, 25, 25, 23, 26, 28, 26, 25, 26, 28, 23, 24, 25, 27, 27, 26, 26, 25, 26, 23, 22, 25, 28, 27, 25, 33, 29, 27, 28, 26, 22, 27, 31, 31, 35, 34, 31, 27, 26, 27, 26, 27, 28, 28, 27, 26, 24, 23, 24, 25, 28, 29, 26, 23, 25, 26, 24, 23, 26, 25, 23, 30, 37, 33, 26, 26, 29, 26, 23, 27, 28, 27, 26, 25, 24, 23, 21, 21, 27, 23, 22, 24, 24, 23, 24, 28, 29, 29, 29, 30, 29, 28, 27, 25, 25, 25, 26, 28, 29, 30, 24, 39, 101, 157, 178, 191, 189, 191, 193, 193, 192, 194, 196, 198, 201, 201, 199, 198, 199, 200, 199, 196, 193, 203, 204, 200, 196, 197, 199, 196, 194, 199, 199, 199, 197, 195, 194, 194, 201, 199, 195, 193, 194, 194, 192, 194, 200, 200, 199, 198, 196, 196, 194, 195, 197, 190, 194, 189, 181, 167, 113, 36, 19, 18, 21, 21, 22, 19, 22, 25, 27, 29, 28, 25, 21, 22, 31, 29, 28, 29, 28, 26, 22, 22, 21, 21, 24, 25, 21, 24, 27, 20, 24, 27, 26, 23, 22, 23, 27, 25, 26, 18, 17, 66, 99, 72, 45, 30, 30, 37, 36, 34, 32, 26, 23, 21, 18, 14, 12, 14, 14, 19, 20, 16, 13, 17, 23, 24, 22, 25, 35, 48, 65, 91, 125, 149, 23, 22, 21, 20, 20, 21, 23, 23, 23, 24, 23, 21, 22, 23, 26, 31, 28, 27, 28, 26, 22, 22, 23, 24, 26, 27, 26, 25, 26, 27, 22, 24, 26, 28, 28, 26, 25, 24, 25, 25, 24, 25, 26, 26, 26, 31, 28, 26, 30, 27, 23, 28, 31, 26, 32, 33, 29, 23, 23, 25, 29, 29, 29, 29, 27, 26, 24, 23, 22, 27, 33, 34, 29, 25, 27, 26, 25, 25, 24, 20, 19, 28, 37, 31, 25, 26, 28, 25, 23, 26, 28, 28, 26, 24, 23, 22, 22, 22, 27, 25, 25, 25, 24, 22, 25, 30, 31, 29, 30, 31, 31, 29, 26, 25, 25, 25, 26, 27, 30, 31, 25, 39, 104, 160, 180, 190, 188, 191, 194, 194, 194, 195, 198, 201, 203, 202, 199, 198, 199, 200, 199, 196, 193, 203, 204, 201, 197, 197, 199, 196, 195, 199, 199, 199, 198, 195, 194, 194, 201, 201, 197, 196, 196, 196, 192, 193, 198, 199, 199, 198, 197, 196, 194, 196, 199, 189, 195, 189, 181, 165, 111, 38, 22, 21, 24, 24, 24, 20, 21, 24, 27, 29, 26, 23, 22, 25, 34, 27, 25, 27, 30, 28, 23, 21, 17, 16, 21, 22, 21, 22, 22, 14, 22, 27, 26, 23, 24, 27, 26, 23, 24, 16, 25, 76, 101, 68, 36, 26, 29, 35, 33, 33, 32, 29, 28, 25, 18, 17, 23, 26, 21, 28, 25, 18, 13, 16, 21, 24, 22, 29, 48, 66, 80, 100, 127, 148, 22, 22, 22, 22, 22, 22, 23, 22, 21, 22, 23, 23, 24, 25, 28, 27, 25, 26, 27, 26, 24, 25, 25, 25, 26, 27, 26, 26, 26, 26, 21, 23, 25, 27, 27, 25, 23, 22, 23, 24, 25, 24, 23, 24, 26, 30, 33, 32, 29, 26, 27, 30, 31, 28, 29, 28, 24, 20, 21, 24, 27, 27, 27, 26, 26, 24, 23, 22, 22, 25, 31, 32, 28, 24, 25, 26, 26, 26, 24, 18, 17, 24, 31, 26, 23, 25, 29, 28, 27, 30, 29, 27, 25, 23, 23, 23, 24, 25, 26, 25, 27, 28, 25, 24, 29, 33, 32, 28, 29, 32, 32, 29, 24, 26, 26, 26, 27, 27, 29, 30, 24, 40, 107, 163, 182, 191, 190, 194, 197, 194, 193, 194, 198, 201, 201, 201, 199, 198, 199, 200, 199, 196, 193, 202, 204, 201, 197, 197, 199, 196, 195, 199, 199, 199, 197, 196, 194, 194, 199, 199, 196, 197, 198, 197, 193, 194, 197, 198, 199, 199, 198, 195, 193, 194, 197, 188, 195, 191, 183, 168, 113, 37, 22, 23, 28, 28, 29, 24, 21, 24, 27, 28, 24, 23, 22, 26, 33, 27, 24, 26, 29, 29, 26, 25, 21, 18, 22, 24, 22, 19, 17, 11, 19, 26, 27, 28, 32, 34, 28, 24, 20, 11, 30, 86, 105, 69, 38, 28, 31, 34, 30, 30, 31, 29, 29, 27, 19, 20, 30, 33, 25, 34, 28, 19, 14, 15, 19, 22, 24, 39, 63, 82, 91, 106, 127, 143, 20, 22, 23, 24, 25, 23, 23, 21, 21, 22, 24, 25, 25, 25, 26, 25, 25, 26, 27, 27, 28, 29, 28, 26, 26, 26, 26, 26, 26, 26, 21, 22, 24, 26, 27, 25, 23, 22, 22, 25, 26, 24, 22, 23, 27, 33, 43, 43, 28, 24, 30, 29, 26, 30, 27, 24, 21, 20, 22, 23, 24, 25, 24, 24, 24, 23, 23, 24, 26, 24, 26, 29, 27, 23, 21, 26, 27, 27, 25, 21, 21, 23, 25, 24, 23, 25, 29, 30, 30, 33, 29, 25, 24, 23, 23, 25, 26, 27, 25, 26, 29, 30, 27, 27, 32, 34, 30, 27, 28, 31, 32, 29, 23, 28, 28, 27, 27, 27, 28, 29, 22, 39, 108, 165, 185, 194, 194, 199, 199, 196, 194, 194, 196, 199, 200, 200, 199, 198, 199, 200, 199, 196, 193, 201, 203, 202, 197, 197, 198, 197, 196, 199, 199, 199, 198, 195, 194, 194, 197, 196, 195, 196, 198, 197, 194, 194, 196, 197, 199, 199, 198, 195, 193, 192, 194, 188, 196, 193, 186, 170, 114, 35, 20, 22, 27, 28, 28, 24, 21, 24, 27, 27, 23, 22, 22, 25, 30, 26, 24, 25, 27, 29, 30, 32, 28, 24, 28, 30, 26, 21, 19, 15, 20, 24, 27, 32, 34, 32, 28, 26, 19, 11, 37, 94, 104, 67, 40, 31, 33, 33, 29, 31, 33, 28, 28, 28, 21, 22, 34, 35, 25, 37, 30, 22, 17, 16, 18, 22, 32, 53, 76, 90, 96, 109, 129, 144, 19, 21, 24, 26, 26, 24, 23, 22, 23, 24, 26, 27, 26, 23, 21, 25, 27, 28, 27, 28, 30, 30, 29, 27, 26, 25, 25, 26, 26, 26, 22, 23, 25, 26, 27, 26, 25, 23, 22, 26, 27, 24, 22, 24, 28, 35, 51, 51, 28, 20, 31, 28, 21, 29, 24, 21, 22, 24, 22, 19, 21, 22, 22, 22, 22, 22, 23, 25, 29, 21, 20, 25, 26, 23, 19, 25, 28, 28, 27, 27, 29, 26, 24, 25, 25, 27, 30, 30, 31, 32, 27, 24, 23, 23, 24, 26, 28, 28, 24, 25, 29, 31, 29, 29, 33, 33, 29, 25, 26, 30, 31, 28, 23, 30, 29, 28, 28, 27, 27, 28, 21, 39, 107, 166, 187, 198, 199, 202, 202, 199, 196, 195, 196, 199, 201, 201, 199, 198, 199, 200, 199, 196, 193, 200, 203, 202, 197, 196, 198, 197, 197, 199, 199, 199, 198, 195, 194, 194, 196, 195, 194, 195, 197, 197, 194, 194, 195, 197, 198, 199, 197, 195, 193, 192, 194, 190, 197, 194, 186, 170, 114, 34, 18, 19, 24, 24, 25, 22, 20, 23, 27, 26, 23, 22, 22, 24, 26, 25, 24, 23, 24, 28, 33, 35, 32, 29, 32, 33, 28, 24, 24, 20, 23, 23, 26, 33, 34, 26, 26, 27, 19, 14, 46, 97, 95, 57, 39, 31, 33, 32, 29, 35, 39, 30, 29, 29, 24, 25, 36, 34, 24, 36, 31, 24, 20, 18, 20, 27, 46, 69, 84, 90, 94, 111, 135, 149, 18, 20, 23, 26, 26, 24, 23, 25, 27, 27, 28, 28, 25, 20, 15, 24, 28, 28, 25, 26, 27, 27, 27, 28, 26, 25, 26, 27, 26, 25, 25, 26, 26, 27, 28, 28, 27, 26, 25, 27, 28, 27, 25, 27, 29, 30, 46, 48, 27, 19, 32, 30, 22, 25, 23, 22, 27, 27, 21, 13, 19, 20, 20, 20, 20, 21, 22, 25, 29, 18, 16, 21, 25, 23, 20, 24, 28, 29, 29, 31, 36, 32, 27, 28, 28, 29, 30, 30, 29, 29, 26, 24, 24, 24, 25, 27, 28, 28, 25, 24, 28, 31, 30, 29, 31, 30, 26, 24, 26, 28, 30, 27, 24, 30, 29, 28, 28, 28, 28, 29, 22, 40, 108, 167, 189, 201, 200, 203, 205, 202, 199, 197, 199, 201, 203, 202, 199, 198, 199, 200, 199, 196, 193, 199, 203, 202, 197, 195, 198, 198, 197, 199, 199, 199, 197, 195, 194, 194, 197, 196, 193, 194, 196, 197, 195, 194, 195, 196, 197, 198, 197, 195, 194, 193, 195, 191, 197, 193, 184, 168, 112, 36, 20, 18, 22, 22, 22, 19, 21, 24, 25, 25, 24, 22, 23, 22, 23, 24, 23, 23, 23, 26, 31, 32, 28, 27, 30, 32, 27, 26, 28, 20, 22, 21, 24, 33, 34, 24, 25, 26, 19, 21, 56, 95, 80, 40, 35, 29, 31, 32, 32, 40, 44, 35, 32, 33, 30, 31, 35, 34, 27, 30, 28, 25, 21, 19, 23, 35, 62, 85, 89, 87, 91, 112, 139, 153, 20, 21, 21, 22, 23, 24, 24, 28, 29, 27, 26, 26, 24, 20, 17, 23, 27, 26, 22, 22, 25, 23, 24, 28, 25, 24, 25, 27, 26, 24, 27, 27, 26, 26, 26, 27, 28, 27, 25, 27, 27, 27, 27, 27, 29, 22, 32, 36, 27, 22, 28, 30, 26, 22, 22, 24, 25, 25, 20, 12, 21, 23, 22, 21, 20, 21, 22, 24, 27, 19, 18, 23, 27, 26, 25, 24, 28, 30, 29, 29, 34, 34, 31, 27, 28, 29, 29, 29, 28, 27, 25, 25, 26, 26, 27, 26, 26, 25, 25, 23, 25, 29, 29, 26, 26, 25, 24, 25, 26, 28, 28, 28, 27, 27, 27, 27, 28, 29, 30, 31, 25, 42, 108, 167, 191, 204, 202, 202, 205, 203, 199, 199, 200, 204, 208, 205, 199, 198, 198, 200, 199, 196, 193, 198, 203, 202, 197, 195, 197, 198, 198, 199, 199, 199, 198, 195, 194, 194, 202, 199, 195, 195, 196, 196, 194, 195, 196, 196, 196, 195, 196, 196, 194, 193, 196, 189, 196, 191, 181, 164, 110, 38, 22, 20, 24, 24, 24, 22, 24, 25, 24, 25, 24, 23, 22, 21, 24, 22, 21, 22, 22, 24, 25, 25, 24, 25, 27, 28, 25, 27, 29, 14, 20, 22, 25, 33, 37, 29, 26, 23, 15, 20, 58, 86, 64, 30, 34, 29, 31, 32, 33, 40, 40, 36, 36, 37, 33, 31, 31, 32, 30, 25, 25, 25, 23, 21, 31, 50, 75, 91, 92, 87, 91, 112, 133, 139, 22, 21, 19, 19, 21, 24, 26, 28, 28, 24, 23, 25, 26, 24, 22, 23, 28, 27, 23, 24, 27, 25, 26, 29, 25, 24, 24, 26, 26, 24, 26, 25, 24, 23, 24, 25, 28, 27, 24, 24, 25, 25, 26, 26, 27, 23, 24, 28, 29, 21, 18, 23, 27, 23, 23, 21, 20, 19, 18, 16, 24, 25, 24, 22, 21, 21, 21, 23, 25, 21, 22, 27, 29, 28, 30, 25, 29, 32, 27, 23, 28, 32, 31, 24, 26, 27, 28, 29, 29, 27, 26, 27, 27, 28, 27, 25, 24, 23, 27, 23, 23, 27, 27, 23, 21, 22, 23, 26, 27, 28, 28, 29, 29, 25, 26, 26, 28, 30, 32, 33, 28, 43, 108, 167, 193, 206, 203, 200, 203, 201, 199, 199, 201, 205, 209, 206, 199, 198, 199, 200, 199, 196, 193, 198, 203, 203, 197, 195, 197, 199, 198, 199, 199, 199, 197, 195, 194, 194, 205, 204, 197, 196, 195, 196, 194, 194, 195, 195, 194, 194, 195, 195, 195, 191, 192, 188, 194, 190, 180, 162, 108, 37, 19, 18, 23, 24, 27, 24, 27, 26, 23, 24, 24, 24, 21, 21, 27, 22, 20, 21, 24, 23, 20, 25, 28, 28, 31, 29, 27, 31, 33, 17, 25, 27, 26, 32, 36, 31, 27, 21, 8, 14, 53, 79, 57, 30, 39, 32, 33, 32, 31, 35, 31, 33, 34, 32, 30, 26, 22, 25, 30, 26, 27, 29, 28, 28, 41, 67, 83, 89, 92, 90, 96, 113, 120, 116, 22, 23, 21, 19, 21, 25, 26, 26, 26, 24, 23, 24, 26, 28, 28, 22, 24, 26, 25, 26, 28, 27, 26, 27, 26, 25, 25, 25, 24, 22, 22, 24, 25, 25, 25, 25, 26, 26, 26, 28, 30, 29, 27, 25, 25, 22, 19, 21, 24, 21, 19, 21, 23, 24, 22, 19, 19, 19, 17, 15, 20, 22, 22, 22, 23, 24, 25, 25, 23, 22, 23, 26, 25, 25, 26, 25, 30, 32, 26, 20, 23, 27, 27, 25, 28, 28, 26, 25, 26, 29, 30, 29, 29, 27, 25, 23, 22, 23, 27, 25, 27, 29, 28, 24, 20, 22, 24, 26, 28, 29, 29, 28, 26, 28, 28, 27, 27, 28, 30, 31, 25, 45, 110, 166, 193, 204, 205, 205, 205, 200, 197, 197, 201, 205, 208, 206, 201, 199, 199, 199, 198, 196, 196, 201, 204, 201, 196, 197, 200, 198, 197, 200, 199, 199, 200, 199, 196, 194, 200, 200, 196, 196, 195, 195, 193, 194, 195, 194, 193, 193, 193, 193, 194, 189, 193, 192, 195, 184, 177, 160, 105, 39, 21, 19, 22, 23, 26, 25, 27, 28, 27, 25, 24, 25, 23, 20, 24, 20, 16, 18, 20, 21, 20, 26, 29, 28, 31, 32, 33, 33, 32, 21, 27, 29, 26, 27, 30, 30, 32, 24, 13, 10, 14, 46, 67, 50, 26, 30, 32, 35, 32, 33, 35, 28, 29, 32, 32, 30, 29, 27, 25, 25, 25, 30, 33, 31, 37, 55, 80, 88, 90, 95, 94, 95, 105, 107, 90, 21, 25, 23, 20, 21, 26, 25, 23, 23, 24, 23, 23, 24, 27, 31, 21, 22, 25, 27, 28, 27, 26, 26, 26, 27, 27, 27, 25, 23, 21, 18, 21, 26, 28, 27, 26, 26, 26, 27, 32, 34, 32, 28, 25, 24, 19, 17, 17, 19, 22, 23, 22, 20, 23, 21, 20, 20, 21, 18, 15, 17, 19, 20, 23, 25, 26, 27, 26, 23, 22, 23, 24, 22, 21, 20, 25, 30, 31, 24, 20, 23, 24, 24, 27, 29, 28, 23, 21, 24, 29, 30, 30, 29, 27, 24, 22, 24, 25, 25, 27, 30, 31, 29, 26, 23, 25, 27, 27, 26, 27, 27, 27, 25, 31, 30, 27, 25, 25, 26, 27, 21, 45, 111, 165, 192, 202, 206, 208, 207, 199, 196, 196, 200, 204, 205, 205, 201, 199, 200, 199, 197, 196, 198, 204, 204, 199, 195, 199, 202, 197, 196, 202, 199, 199, 201, 201, 197, 193, 196, 197, 195, 196, 196, 195, 193, 194, 196, 195, 192, 191, 191, 192, 193, 189, 194, 195, 195, 179, 175, 160, 102, 39, 22, 20, 22, 23, 27, 27, 27, 30, 30, 26, 25, 26, 25, 21, 21, 18, 15, 16, 18, 21, 23, 26, 26, 25, 28, 32, 34, 32, 28, 22, 25, 27, 24, 21, 23, 27, 32, 26, 17, 19, 41, 58, 49, 29, 21, 30, 33, 30, 33, 34, 28, 27, 32, 35, 34, 35, 36, 31, 23, 24, 31, 33, 31, 43, 66, 88, 90, 89, 96, 93, 86, 92, 93, 74, 20, 24, 23, 20, 21, 25, 23, 21, 21, 22, 22, 21, 21, 24, 26, 22, 24, 27, 29, 29, 27, 24, 26, 29, 29, 29, 29, 28, 26, 25, 16, 19, 24, 27, 27, 27, 27, 26, 26, 30, 33, 32, 28, 26, 25, 19, 19, 18, 20, 23, 24, 23, 21, 20, 22, 23, 22, 20, 20, 20, 21, 22, 22, 23, 24, 24, 25, 25, 24, 24, 24, 24, 23, 22, 21, 26, 30, 30, 24, 21, 24, 26, 24, 27, 26, 24, 23, 23, 24, 26, 27, 28, 29, 27, 26, 25, 27, 28, 24, 26, 29, 30, 29, 27, 25, 28, 30, 27, 23, 21, 23, 26, 28, 26, 28, 27, 23, 21, 22, 27, 20, 44, 109, 164, 190, 201, 205, 207, 206, 199, 196, 195, 198, 202, 202, 202, 200, 199, 200, 200, 197, 195, 198, 204, 203, 198, 195, 198, 201, 196, 197, 202, 199, 198, 199, 199, 196, 192, 199, 198, 196, 196, 196, 195, 194, 195, 197, 195, 193, 191, 190, 191, 192, 190, 192, 191, 191, 181, 177, 159, 97, 33, 18, 18, 22, 25, 30, 31, 29, 31, 30, 26, 25, 26, 25, 23, 21, 19, 18, 19, 21, 24, 27, 23, 22, 23, 25, 29, 29, 28, 25, 20, 23, 23, 22, 20, 20, 23, 20, 22, 24, 23, 36, 53, 56, 45, 25, 29, 28, 27, 28, 29, 26, 29, 34, 38, 37, 36, 37, 35, 29, 26, 28, 27, 28, 45, 70, 92, 91, 87, 93, 84, 71, 75, 80, 70, 19, 22, 22, 20, 21, 23, 23, 20, 19, 21, 21, 20, 19, 20, 21, 25, 26, 29, 31, 29, 27, 23, 24, 26, 27, 27, 28, 27, 26, 26, 16, 18, 23, 26, 26, 26, 26, 26, 25, 29, 31, 31, 29, 26, 26, 19, 19, 21, 23, 22, 24, 27, 25, 21, 26, 26, 23, 20, 20, 23, 26, 25, 23, 22, 22, 22, 23, 24, 24, 25, 25, 25, 25, 24, 23, 27, 29, 26, 23, 24, 27, 27, 25, 28, 25, 24, 25, 26, 26, 23, 25, 27, 29, 29, 28, 27, 27, 29, 27, 29, 31, 32, 31, 29, 27, 29, 32, 30, 27, 23, 21, 26, 30, 22, 25, 26, 22, 18, 19, 25, 20, 44, 109, 164, 191, 202, 205, 208, 206, 200, 198, 197, 197, 199, 200, 199, 199, 198, 201, 201, 198, 195, 197, 203, 202, 198, 195, 198, 199, 195, 197, 202, 199, 196, 197, 197, 195, 192, 202, 201, 198, 196, 195, 196, 194, 196, 196, 194, 191, 190, 191, 191, 191, 192, 192, 185, 189, 182, 178, 156, 93, 30, 15, 17, 23, 26, 32, 32, 30, 32, 30, 26, 24, 28, 25, 23, 22, 20, 18, 18, 20, 22, 26, 21, 21, 26, 28, 28, 28, 27, 28, 25, 25, 25, 25, 24, 23, 22, 18, 22, 25, 20, 30, 49, 53, 40, 31, 27, 25, 26, 24, 21, 22, 28, 33, 36, 33, 30, 31, 31, 29, 26, 26, 25, 32, 52, 75, 91, 92, 91, 90, 73, 53, 57, 69, 66, 19, 21, 21, 21, 21, 22, 22, 19, 19, 22, 23, 22, 19, 19, 19, 25, 26, 28, 28, 27, 26, 24, 23, 24, 24, 25, 26, 26, 26, 26, 19, 22, 25, 26, 25, 24, 24, 24, 24, 27, 30, 30, 29, 27, 26, 19, 20, 24, 24, 23, 25, 29, 30, 26, 29, 29, 25, 22, 20, 22, 27, 27, 25, 23, 22, 23, 25, 26, 26, 28, 28, 27, 28, 27, 26, 28, 27, 23, 22, 25, 27, 27, 25, 29, 28, 28, 28, 28, 26, 24, 25, 28, 29, 30, 27, 25, 25, 25, 30, 31, 31, 30, 28, 25, 23, 24, 26, 30, 30, 26, 21, 23, 28, 24, 25, 25, 22, 19, 22, 26, 22, 47, 111, 165, 193, 203, 208, 210, 207, 203, 200, 198, 198, 198, 198, 199, 198, 198, 201, 202, 198, 195, 196, 203, 201, 198, 196, 197, 199, 196, 197, 201, 197, 195, 194, 195, 194, 194, 204, 203, 198, 195, 194, 194, 193, 195, 195, 194, 192, 191, 190, 190, 190, 190, 190, 186, 189, 181, 176, 154, 91, 30, 16, 19, 25, 26, 28, 28, 29, 32, 32, 26, 25, 28, 25, 23, 25, 24, 21, 19, 18, 20, 22, 21, 24, 29, 30, 29, 26, 26, 28, 29, 28, 27, 28, 29, 27, 24, 23, 23, 18, 14, 31, 54, 50, 29, 33, 27, 29, 32, 26, 19, 19, 26, 31, 32, 28, 23, 25, 27, 26, 28, 28, 32, 46, 65, 80, 85, 90, 93, 83, 61, 39, 43, 60, 60, 19, 19, 21, 22, 22, 21, 21, 20, 21, 24, 26, 24, 21, 19, 19, 26, 25, 24, 24, 24, 25, 26, 25, 25, 25, 25, 26, 27, 27, 27, 23, 24, 27, 27, 25, 24, 24, 24, 24, 25, 28, 29, 29, 27, 26, 19, 22, 25, 24, 24, 26, 30, 33, 30, 29, 29, 27, 25, 23, 21, 27, 28, 26, 24, 24, 25, 27, 28, 28, 31, 30, 29, 31, 31, 29, 28, 25, 21, 21, 25, 27, 26, 25, 28, 30, 32, 30, 27, 25, 25, 25, 26, 28, 29, 27, 24, 23, 24, 28, 28, 27, 25, 24, 21, 20, 20, 22, 26, 29, 26, 20, 21, 27, 28, 26, 24, 23, 25, 27, 29, 22, 47, 111, 165, 193, 204, 209, 210, 207, 204, 201, 198, 197, 196, 195, 197, 197, 198, 201, 202, 198, 195, 196, 204, 201, 199, 198, 198, 198, 196, 197, 198, 196, 194, 194, 195, 195, 196, 204, 202, 197, 194, 192, 193, 192, 193, 194, 193, 192, 191, 190, 189, 189, 188, 189, 188, 190, 178, 173, 152, 91, 30, 18, 21, 27, 26, 26, 23, 28, 32, 32, 27, 26, 28, 26, 24, 29, 29, 26, 23, 21, 21, 23, 22, 25, 29, 29, 26, 22, 23, 24, 29, 27, 25, 27, 28, 27, 22, 22, 20, 12, 13, 36, 64, 55, 29, 33, 28, 34, 41, 32, 18, 17, 23, 28, 28, 26, 23, 26, 30, 30, 31, 31, 39, 57, 75, 84, 84, 89, 88, 71, 48, 30, 37, 56, 56, 19, 19, 20, 23, 23, 21, 21, 21, 23, 26, 27, 26, 23, 21, 21, 25, 23, 21, 21, 22, 24, 27, 27, 25, 25, 25, 26, 27, 28, 28, 24, 25, 27, 28, 26, 26, 27, 26, 24, 25, 26, 28, 29, 27, 26, 21, 23, 25, 25, 25, 26, 31, 33, 31, 28, 27, 28, 29, 27, 22, 28, 29, 27, 26, 27, 29, 30, 31, 30, 34, 33, 31, 33, 35, 32, 28, 24, 21, 22, 25, 25, 25, 26, 26, 31, 33, 30, 25, 23, 25, 24, 23, 26, 27, 26, 24, 24, 25, 26, 26, 24, 23, 23, 22, 22, 22, 22, 24, 28, 26, 21, 24, 33, 32, 27, 23, 25, 30, 32, 31, 22, 45, 110, 164, 192, 202, 207, 207, 204, 202, 199, 196, 193, 192, 192, 195, 196, 197, 200, 201, 197, 195, 196, 205, 202, 200, 199, 199, 197, 197, 197, 197, 196, 195, 194, 195, 195, 197, 203, 201, 196, 194, 192, 191, 191, 193, 194, 194, 193, 192, 190, 189, 188, 185, 189, 189, 190, 177, 171, 152, 91, 30, 18, 22, 27, 26, 26, 22, 27, 31, 32, 28, 28, 28, 26, 23, 30, 30, 29, 26, 23, 23, 26, 24, 25, 27, 27, 23, 20, 20, 22, 29, 26, 23, 24, 26, 25, 21, 17, 14, 11, 17, 41, 66, 57, 34, 32, 29, 37, 46, 36, 19, 15, 18, 22, 22, 22, 25, 31, 36, 36, 34, 35, 45, 64, 80, 86, 85, 86, 76, 55, 35, 25, 37, 55, 54, 20, 19, 21, 24, 24, 21, 21, 22, 24, 26, 28, 26, 24, 22, 22, 25, 23, 21, 21, 21, 24, 26, 26, 24, 24, 24, 24, 25, 26, 27, 22, 24, 27, 27, 27, 28, 29, 28, 24, 24, 25, 27, 28, 27, 25, 24, 25, 25, 25, 25, 27, 31, 32, 29, 27, 26, 29, 31, 30, 25, 29, 30, 29, 29, 30, 31, 33, 33, 31, 36, 35, 32, 36, 38, 34, 29, 25, 23, 24, 25, 24, 25, 27, 26, 30, 32, 28, 23, 21, 24, 21, 20, 23, 24, 25, 25, 27, 28, 27, 26, 25, 26, 26, 28, 29, 30, 27, 25, 28, 27, 24, 29, 40, 33, 27, 23, 26, 32, 35, 33, 21, 42, 107, 162, 189, 199, 203, 205, 202, 199, 196, 192, 189, 188, 190, 194, 196, 196, 199, 200, 197, 195, 197, 205, 201, 200, 201, 199, 196, 197, 198, 197, 197, 196, 196, 195, 195, 197, 201, 200, 196, 194, 193, 192, 190, 192, 194, 194, 193, 192, 189, 189, 186, 186, 189, 189, 190, 178, 172, 152, 91, 30, 18, 21, 26, 27, 27, 25, 26, 30, 33, 30, 29, 29, 25, 22, 26, 28, 29, 26, 24, 25, 28, 27, 26, 26, 25, 22, 21, 21, 23, 31, 27, 23, 22, 24, 25, 22, 14, 11, 14, 25, 43, 58, 50, 35, 30, 30, 37, 44, 35, 20, 14, 13, 14, 15, 17, 25, 36, 43, 40, 36, 38, 50, 67, 81, 86, 87, 79, 60, 38, 24, 22, 39, 55, 53, 21, 19, 22, 26, 25, 22, 22, 22, 23, 25, 26, 25, 23, 23, 23, 25, 25, 24, 24, 23, 23, 23, 23, 24, 23, 22, 22, 23, 24, 26, 22, 24, 26, 27, 26, 26, 28, 28, 24, 23, 24, 27, 28, 26, 24, 26, 25, 24, 23, 25, 28, 31, 30, 29, 28, 28, 28, 29, 29, 27, 29, 30, 30, 30, 31, 31, 32, 31, 31, 36, 34, 31, 35, 38, 33, 30, 27, 26, 28, 27, 23, 25, 30, 28, 30, 30, 28, 24, 23, 24, 22, 21, 23, 24, 24, 26, 29, 31, 30, 29, 28, 28, 30, 32, 34, 36, 31, 26, 30, 31, 27, 31, 40, 30, 26, 24, 26, 31, 33, 33, 22, 43, 107, 161, 187, 198, 203, 204, 201, 198, 194, 188, 186, 187, 190, 195, 196, 195, 198, 199, 197, 196, 199, 205, 200, 199, 201, 198, 195, 196, 198, 198, 200, 199, 197, 194, 193, 194, 200, 200, 197, 196, 195, 193, 192, 192, 195, 194, 193, 191, 190, 188, 186, 187, 190, 186, 190, 181, 175, 152, 90, 33, 19, 20, 24, 26, 29, 29, 26, 29, 33, 34, 31, 29, 25, 20, 24, 27, 28, 26, 22, 24, 28, 27, 26, 22, 22, 24, 24, 24, 25, 33, 30, 25, 23, 24, 26, 26, 18, 13, 18, 31, 46, 50, 39, 27, 28, 27, 31, 34, 29, 19, 14, 9, 8, 9, 12, 23, 37, 42, 38, 34, 39, 54, 71, 80, 82, 83, 69, 46, 29, 21, 22, 39, 55, 52, 22, 19, 22, 27, 26, 22, 22, 22, 21, 23, 24, 23, 22, 22, 23, 25, 26, 27, 28, 26, 23, 21, 23, 28, 27, 26, 26, 26, 28, 29, 25, 25, 27, 26, 24, 24, 25, 26, 25, 23, 23, 26, 28, 26, 23, 27, 25, 22, 22, 27, 29, 30, 29, 30, 32, 32, 29, 26, 24, 25, 30, 31, 32, 32, 32, 32, 31, 31, 31, 37, 35, 32, 36, 39, 34, 31, 29, 29, 31, 28, 23, 26, 33, 32, 31, 29, 29, 28, 27, 25, 25, 25, 25, 25, 24, 24, 27, 30, 29, 28, 26, 25, 26, 28, 30, 31, 26, 23, 30, 33, 26, 24, 30, 27, 26, 25, 25, 28, 31, 33, 23, 43, 108, 163, 189, 198, 202, 204, 200, 199, 193, 189, 186, 188, 192, 196, 197, 195, 197, 198, 196, 196, 199, 203, 199, 198, 200, 197, 193, 195, 199, 201, 202, 201, 198, 194, 191, 191, 199, 200, 198, 197, 197, 195, 192, 193, 195, 194, 193, 191, 190, 188, 186, 190, 190, 184, 188, 183, 178, 152, 90, 40, 22, 19, 22, 23, 29, 31, 25, 29, 34, 35, 32, 30, 24, 20, 29, 33, 34, 30, 25, 25, 28, 24, 20, 15, 16, 19, 22, 23, 24, 33, 30, 26, 22, 22, 24, 25, 23, 15, 16, 35, 56, 56, 38, 25, 26, 25, 24, 25, 21, 17, 15, 12, 13, 10, 9, 12, 24, 38, 40, 34, 31, 41, 61, 79, 81, 75, 72, 62, 42, 28, 22, 23, 38, 52, 49, 23, 21, 22, 24, 23, 21, 22, 23, 23, 23, 23, 22, 20, 21, 22, 22, 25, 27, 27, 25, 24, 24, 25, 25, 22, 22, 25, 27, 26, 22, 24, 26, 27, 26, 23, 22, 23, 25, 25, 25, 27, 28, 26, 24, 24, 29, 28, 25, 24, 27, 28, 29, 28, 29, 29, 24, 27, 29, 23, 25, 23, 25, 28, 29, 27, 24, 24, 25, 28, 32, 30, 30, 33, 32, 31, 31, 28, 26, 27, 28, 26, 23, 23, 23, 24, 25, 26, 28, 28, 27, 27, 26, 24, 24, 26, 25, 26, 26, 32, 28, 25, 26, 29, 31, 31, 30, 28, 26, 26, 28, 28, 26, 24, 27, 31, 27, 25, 30, 32, 32, 23, 41, 107, 165, 184, 191, 202, 201, 203, 200, 195, 193, 192, 196, 200, 198, 192, 192, 194, 194, 191, 191, 196, 199, 197, 196, 195, 193, 191, 192, 196, 199, 199, 197, 193, 190, 188, 189, 199, 199, 199, 196, 192, 189, 188, 191, 196, 196, 195, 194, 193, 192, 190, 194, 196, 188, 190, 185, 177, 148, 89, 43, 26, 25, 25, 22, 27, 34, 27, 28, 31, 33, 31, 27, 21, 18, 25, 29, 26, 20, 19, 23, 24, 25, 22, 17, 20, 23, 25, 26, 27, 24, 24, 24, 27, 28, 29, 26, 21, 9, 13, 49, 75, 56, 27, 24, 30, 29, 27, 24, 18, 15, 17, 18, 15, 12, 14, 22, 31, 36, 38, 31, 41, 60, 79, 82, 73, 64, 53, 33, 20, 21, 26, 47, 67, 63, 24, 24, 23, 22, 22, 22, 22, 24, 24, 24, 22, 22, 21, 22, 22, 21, 23, 25, 25, 25, 24, 25, 25, 22, 19, 19, 24, 26, 23, 18, 23, 26, 27, 26, 22, 22, 24, 25, 25, 26, 28, 28, 25, 23, 27, 28, 28, 26, 26, 26, 27, 28, 27, 27, 27, 21, 27, 33, 26, 25, 19, 20, 24, 25, 22, 21, 22, 23, 23, 27, 25, 28, 31, 28, 29, 30, 28, 25, 24, 25, 26, 22, 20, 18, 20, 22, 25, 27, 28, 29, 29, 27, 24, 24, 27, 26, 25, 23, 32, 27, 24, 28, 33, 36, 36, 31, 29, 28, 24, 24, 28, 28, 23, 29, 36, 29, 26, 32, 33, 32, 24, 43, 110, 168, 183, 189, 203, 200, 204, 200, 197, 195, 197, 201, 204, 199, 191, 191, 193, 192, 188, 188, 192, 197, 196, 195, 192, 190, 191, 191, 194, 199, 198, 195, 191, 190, 188, 189, 197, 197, 198, 195, 191, 188, 189, 192, 196, 196, 196, 196, 194, 194, 193, 193, 197, 189, 189, 185, 174, 144, 88, 42, 27, 29, 29, 24, 27, 33, 27, 27, 29, 31, 30, 26, 21, 19, 21, 25, 21, 15, 16, 21, 21, 27, 24, 19, 23, 27, 26, 26, 27, 21, 22, 26, 31, 34, 33, 27, 20, 8, 19, 66, 89, 57, 25, 25, 31, 30, 29, 25, 19, 17, 20, 21, 19, 16, 18, 24, 29, 37, 44, 35, 45, 62, 79, 81, 70, 57, 46, 27, 17, 22, 30, 53, 78, 75, 25, 24, 24, 23, 23, 23, 23, 24, 26, 25, 24, 23, 23, 23, 23, 22, 22, 21, 22, 25, 24, 23, 22, 22, 20, 21, 23, 25, 23, 19, 23, 25, 26, 25, 23, 23, 25, 26, 25, 24, 26, 26, 24, 25, 30, 27, 25, 26, 25, 26, 25, 26, 25, 25, 28, 26, 30, 36, 35, 28, 22, 21, 21, 21, 21, 22, 25, 24, 18, 24, 24, 29, 32, 27, 28, 30, 30, 28, 24, 21, 21, 23, 24, 20, 21, 22, 25, 27, 29, 30, 29, 27, 24, 24, 26, 25, 24, 23, 28, 25, 25, 29, 34, 39, 41, 31, 27, 28, 25, 24, 27, 28, 24, 31, 37, 31, 28, 33, 33, 31, 25, 48, 115, 171, 187, 192, 204, 200, 201, 199, 198, 197, 199, 201, 202, 199, 194, 193, 194, 192, 188, 187, 191, 197, 197, 195, 192, 192, 192, 193, 196, 199, 198, 196, 194, 193, 191, 191, 196, 195, 195, 195, 194, 192, 192, 193, 194, 194, 194, 195, 194, 194, 193, 190, 194, 186, 187, 183, 173, 144, 87, 38, 23, 27, 32, 29, 28, 29, 26, 26, 29, 29, 29, 27, 24, 23, 22, 24, 23, 20, 18, 20, 22, 28, 25, 21, 23, 26, 24, 23, 25, 24, 25, 29, 34, 36, 33, 26, 20, 13, 35, 82, 92, 57, 33, 28, 30, 29, 28, 25, 23, 21, 20, 21, 20, 19, 22, 28, 33, 39, 46, 41, 52, 69, 80, 76, 61, 48, 40, 26, 19, 25, 33, 55, 78, 77, 24, 24, 24, 23, 23, 22, 22, 25, 29, 28, 26, 24, 23, 22, 22, 24, 21, 19, 21, 24, 24, 19, 19, 23, 23, 24, 24, 24, 23, 22, 23, 24, 25, 25, 24, 23, 25, 27, 27, 25, 25, 24, 23, 24, 29, 25, 24, 25, 25, 25, 24, 24, 23, 24, 28, 29, 29, 40, 50, 41, 29, 24, 19, 18, 20, 23, 26, 24, 14, 21, 23, 29, 32, 27, 28, 30, 32, 32, 26, 19, 19, 23, 28, 23, 24, 24, 25, 27, 29, 30, 27, 24, 22, 21, 23, 22, 21, 21, 26, 26, 27, 31, 34, 40, 43, 33, 29, 31, 29, 27, 30, 31, 29, 28, 34, 29, 26, 30, 28, 26, 23, 49, 115, 171, 187, 192, 202, 198, 200, 199, 198, 197, 199, 200, 201, 198, 194, 193, 194, 193, 188, 187, 193, 198, 196, 196, 194, 193, 193, 194, 197, 200, 198, 196, 196, 197, 195, 193, 202, 199, 197, 196, 194, 192, 189, 189, 192, 192, 193, 194, 194, 194, 194, 190, 194, 187, 188, 184, 174, 145, 86, 34, 21, 27, 34, 32, 29, 25, 25, 25, 26, 26, 27, 27, 27, 27, 25, 24, 24, 25, 22, 20, 24, 27, 25, 23, 25, 25, 22, 20, 23, 25, 27, 31, 36, 36, 32, 24, 16, 15, 50, 95, 86, 50, 36, 29, 33, 31, 29, 27, 26, 23, 18, 20, 21, 20, 24, 27, 29, 34, 38, 44, 56, 73, 80, 66, 46, 34, 31, 24, 18, 26, 36, 56, 76, 75, 21, 21, 21, 21, 21, 20, 19, 25, 31, 29, 27, 25, 22, 20, 18, 24, 22, 21, 21, 23, 21, 18, 19, 25, 26, 27, 25, 23, 24, 25, 22, 21, 22, 23, 23, 23, 24, 27, 30, 27, 27, 25, 21, 20, 25, 23, 24, 25, 26, 26, 24, 23, 23, 25, 27, 28, 25, 41, 64, 57, 36, 28, 21, 19, 21, 23, 23, 21, 17, 22, 22, 27, 31, 27, 28, 31, 33, 32, 28, 22, 20, 25, 29, 29, 28, 28, 29, 29, 30, 32, 27, 24, 23, 23, 23, 22, 21, 21, 29, 30, 30, 31, 31, 35, 39, 32, 28, 31, 31, 30, 30, 31, 31, 25, 31, 27, 24, 26, 23, 22, 20, 48, 115, 169, 188, 194, 199, 198, 201, 198, 196, 196, 198, 199, 200, 197, 191, 191, 193, 194, 191, 192, 196, 199, 197, 196, 196, 196, 196, 197, 198, 199, 197, 196, 197, 198, 196, 194, 204, 200, 196, 195, 195, 191, 187, 186, 190, 190, 192, 193, 194, 194, 194, 191, 195, 188, 188, 184, 174, 144, 85, 32, 20, 27, 33, 30, 28, 25, 24, 23, 22, 21, 22, 24, 25, 27, 26, 22, 25, 27, 22, 20, 24, 25, 24, 24, 25, 25, 23, 21, 22, 24, 27, 31, 36, 36, 31, 21, 13, 17, 61, 99, 74, 41, 35, 28, 37, 34, 30, 28, 27, 22, 14, 14, 16, 18, 22, 26, 27, 30, 34, 45, 60, 78, 79, 60, 39, 27, 26, 21, 15, 22, 36, 55, 67, 66, 21, 21, 22, 22, 21, 20, 19, 23, 28, 27, 26, 24, 21, 19, 18, 23, 24, 25, 23, 22, 20, 19, 21, 24, 26, 26, 23, 21, 22, 25, 21, 20, 21, 21, 22, 22, 23, 25, 29, 27, 28, 26, 21, 19, 22, 24, 25, 26, 27, 26, 24, 23, 23, 25, 27, 27, 23, 39, 64, 58, 36, 28, 23, 21, 23, 24, 22, 21, 22, 26, 23, 26, 29, 26, 29, 31, 30, 30, 29, 25, 23, 24, 26, 29, 29, 30, 31, 32, 34, 36, 30, 27, 26, 26, 24, 23, 24, 25, 30, 31, 31, 30, 30, 32, 35, 29, 25, 27, 29, 28, 27, 28, 28, 25, 30, 27, 25, 26, 22, 23, 22, 51, 118, 168, 189, 197, 200, 202, 201, 198, 195, 194, 196, 199, 201, 198, 192, 192, 194, 195, 193, 194, 198, 200, 199, 197, 197, 197, 198, 199, 199, 198, 197, 196, 197, 198, 196, 193, 199, 195, 192, 193, 195, 194, 191, 189, 189, 189, 191, 193, 193, 194, 194, 191, 195, 186, 186, 181, 170, 140, 80, 29, 22, 28, 30, 27, 27, 26, 25, 24, 22, 21, 21, 24, 26, 28, 27, 22, 25, 28, 24, 20, 23, 23, 23, 23, 24, 24, 23, 23, 22, 24, 27, 31, 36, 37, 32, 22, 14, 25, 71, 100, 64, 35, 37, 31, 38, 35, 30, 28, 28, 24, 15, 12, 14, 17, 24, 30, 31, 36, 40, 48, 67, 84, 83, 60, 37, 28, 25, 19, 13, 10, 14, 34, 52, 58, 56, 22, 22, 24, 24, 23, 22, 21, 21, 22, 23, 24, 24, 23, 21, 20, 22, 25, 28, 25, 21, 19, 21, 21, 22, 24, 24, 20, 18, 19, 23, 20, 20, 19, 20, 22, 22, 22, 22, 25, 26, 28, 28, 23, 21, 22, 26, 27, 27, 28, 27, 25, 24, 23, 23, 27, 28, 24, 35, 52, 47, 31, 25, 24, 23, 25, 26, 23, 23, 28, 29, 24, 26, 28, 26, 29, 28, 27, 28, 29, 28, 26, 23, 22, 24, 26, 28, 30, 32, 34, 35, 29, 26, 27, 25, 23, 22, 23, 26, 29, 29, 29, 29, 30, 31, 33, 28, 24, 25, 28, 29, 27, 26, 26, 24, 29, 26, 25, 26, 22, 26, 23, 54, 121, 167, 189, 198, 200, 204, 203, 198, 194, 192, 193, 197, 201, 199, 195, 194, 196, 196, 194, 194, 199, 202, 201, 199, 198, 198, 200, 200, 198, 196, 197, 197, 197, 196, 194, 193, 197, 193, 191, 192, 194, 194, 192, 189, 189, 190, 191, 193, 194, 194, 194, 192, 196, 187, 186, 180, 169, 138, 77, 28, 23, 28, 28, 24, 26, 27, 27, 27, 25, 24, 24, 26, 28, 29, 28, 23, 24, 27, 25, 21, 23, 22, 22, 24, 23, 22, 24, 25, 24, 25, 28, 32, 37, 37, 32, 23, 17, 33, 78, 95, 54, 30, 37, 34, 35, 33, 29, 27, 29, 27, 18, 14, 16, 19, 26, 32, 33, 36, 40, 51, 71, 88, 84, 60, 37, 30, 25, 17, 7, 9, 30, 47, 51, 51, 24, 24, 26, 26, 26, 24, 22, 20, 18, 20, 22, 24, 24, 23, 22, 22, 26, 28, 26, 22, 20, 22, 22, 21, 22, 21, 18, 16, 18, 20, 22, 20, 19, 20, 22, 22, 21, 21, 22, 23, 27, 28, 24, 22, 25, 28, 28, 28, 27, 27, 26, 25, 23, 22, 28, 27, 25, 30, 35, 30, 24, 23, 24, 25, 27, 27, 26, 27, 31, 32, 26, 26, 28, 26, 29, 26, 25, 29, 31, 31, 27, 23, 21, 21, 22, 25, 28, 29, 29, 29, 25, 24, 25, 23, 21, 20, 21, 25, 28, 28, 28, 30, 31, 33, 33, 30, 26, 24, 29, 32, 30, 26, 26, 23, 26, 23, 23, 24, 22, 29, 26, 56, 122, 165, 187, 195, 197, 203, 203, 198, 194, 191, 192, 196, 200, 200, 197, 197, 198, 197, 193, 194, 199, 204, 203, 201, 199, 199, 200, 200, 198, 195, 198, 199, 197, 194, 193, 194, 198, 195, 193, 193, 192, 190, 189, 189, 190, 190, 192, 193, 194, 194, 194, 193, 198, 189, 188, 181, 170, 139, 79, 28, 23, 28, 27, 23, 26, 27, 28, 28, 27, 29, 28, 30, 31, 31, 29, 25, 24, 25, 26, 24, 23, 21, 23, 25, 23, 21, 24, 26, 25, 27, 29, 32, 35, 36, 31, 23, 19, 41, 80, 85, 47, 27, 34, 34, 32, 32, 28, 25, 29, 30, 22, 19, 20, 22, 28, 32, 30, 30, 34, 54, 72, 88, 82, 58, 36, 29, 24, 17, 8, 7, 27, 43, 46, 52, 24, 25, 27, 28, 27, 25, 23, 20, 18, 20, 22, 24, 24, 22, 21, 24, 25, 25, 25, 24, 22, 22, 22, 22, 21, 20, 18, 17, 18, 19, 24, 22, 21, 21, 23, 24, 21, 21, 22, 22, 25, 26, 23, 22, 27, 30, 29, 28, 26, 26, 25, 25, 24, 24, 29, 26, 25, 25, 20, 19, 21, 24, 26, 26, 26, 26, 28, 29, 30, 32, 27, 27, 29, 26, 28, 25, 26, 33, 35, 33, 28, 27, 27, 26, 27, 28, 29, 27, 24, 21, 21, 23, 24, 24, 21, 18, 22, 25, 30, 27, 27, 31, 35, 35, 32, 33, 30, 26, 30, 36, 34, 28, 26, 22, 24, 21, 22, 24, 23, 32, 30, 61, 124, 162, 186, 194, 194, 200, 201, 198, 194, 191, 193, 195, 197, 198, 197, 196, 199, 199, 195, 195, 201, 206, 205, 202, 201, 199, 199, 199, 197, 195, 200, 201, 197, 192, 191, 194, 200, 199, 198, 195, 192, 188, 188, 189, 191, 191, 192, 194, 194, 194, 194, 194, 199, 190, 189, 184, 172, 142, 82, 29, 24, 27, 27, 25, 27, 24, 25, 26, 29, 32, 32, 34, 33, 33, 31, 29, 26, 24, 26, 27, 24, 22, 27, 27, 22, 20, 22, 26, 25, 27, 28, 29, 31, 30, 27, 18, 17, 48, 81, 76, 44, 28, 30, 33, 31, 33, 28, 23, 27, 30, 24, 21, 21, 22, 27, 29, 27, 27, 29, 56, 73, 86, 80, 55, 32, 26, 22, 19, 12, 9, 26, 40, 45, 60, 23, 24, 26, 27, 25, 23, 22, 21, 22, 23, 24, 24, 22, 19, 17, 25, 23, 21, 23, 26, 25, 21, 22, 25, 23, 21, 20, 20, 20, 21, 27, 25, 23, 23, 25, 25, 22, 23, 26, 24, 24, 23, 20, 21, 26, 29, 29, 27, 25, 24, 24, 25, 25, 28, 31, 22, 23, 22, 15, 20, 24, 26, 28, 26, 23, 23, 27, 28, 27, 31, 27, 29, 30, 26, 27, 24, 29, 38, 38, 32, 27, 31, 35, 39, 39, 38, 35, 29, 22, 17, 22, 26, 28, 28, 26, 23, 27, 29, 33, 30, 27, 32, 36, 35, 31, 33, 29, 23, 28, 36, 33, 26, 22, 25, 27, 24, 26, 28, 28, 39, 38, 69, 130, 165, 188, 197, 194, 201, 197, 196, 194, 194, 195, 195, 196, 196, 195, 196, 199, 199, 196, 199, 204, 207, 207, 203, 201, 199, 199, 201, 197, 195, 202, 203, 197, 191, 191, 196, 195, 195, 197, 196, 193, 192, 194, 194, 192, 192, 193, 194, 194, 194, 194, 191, 195, 187, 187, 182, 171, 141, 81, 30, 23, 27, 29, 29, 27, 19, 19, 23, 27, 32, 33, 35, 34, 34, 33, 33, 27, 23, 27, 31, 25, 25, 29, 29, 23, 17, 22, 26, 25, 27, 26, 26, 26, 25, 20, 12, 18, 54, 83, 72, 46, 33, 30, 34, 33, 35, 30, 23, 25, 29, 23, 16, 15, 17, 25, 30, 31, 35, 38, 62, 79, 91, 82, 56, 33, 27, 21, 19, 17, 12, 26, 38, 47, 70, 24, 25, 24, 25, 24, 24, 23, 23, 23, 24, 25, 24, 20, 19, 23, 26, 23, 19, 20, 23, 24, 23, 21, 21, 20, 21, 24, 25, 23, 20, 23, 21, 21, 23, 25, 24, 20, 19, 23, 23, 25, 25, 23, 22, 23, 25, 27, 27, 26, 23, 23, 27, 28, 25, 26, 24, 25, 25, 24, 26, 29, 25, 22, 24, 23, 21, 22, 25, 24, 27, 28, 29, 28, 26, 25, 21, 24, 30, 34, 35, 38, 45, 50, 49, 49, 46, 40, 30, 19, 13, 10, 29, 40, 41, 39, 34, 29, 28, 29, 33, 33, 31, 30, 26, 26, 32, 33, 29, 24, 25, 28, 28, 24, 21, 21, 22, 23, 26, 30, 34, 45, 52, 84, 133, 164, 186, 198, 198, 200, 194, 191, 190, 194, 199, 200, 197, 198, 197, 196, 198, 200, 199, 201, 204, 204, 205, 202, 198, 196, 199, 204, 202, 197, 196, 197, 196, 193, 191, 194, 197, 195, 195, 195, 196, 195, 195, 194, 193, 192, 193, 195, 196, 196, 195, 189, 192, 191, 186, 180, 173, 138, 79, 29, 26, 26, 25, 25, 25, 21, 21, 23, 25, 28, 32, 35, 34, 33, 33, 33, 29, 26, 25, 24, 22, 22, 24, 22, 21, 20, 23, 24, 24, 28, 27, 28, 28, 25, 22, 21, 28, 59, 80, 64, 44, 36, 30, 27, 28, 28, 25, 22, 21, 22, 20, 14, 16, 25, 33, 34, 31, 34, 43, 72, 86, 89, 73, 50, 35, 28, 21, 22, 18, 12, 26, 36, 49, 77, 24, 24, 23, 23, 23, 23, 23, 24, 24, 23, 25, 24, 19, 19, 24, 25, 22, 18, 18, 20, 22, 22, 21, 20, 21, 23, 25, 25, 22, 20, 22, 21, 21, 23, 25, 24, 20, 19, 20, 22, 24, 24, 23, 21, 20, 22, 26, 28, 26, 22, 23, 27, 30, 26, 26, 26, 26, 27, 27, 27, 26, 22, 21, 26, 27, 22, 20, 22, 24, 25, 26, 27, 27, 26, 25, 18, 19, 24, 27, 32, 39, 49, 56, 57, 56, 54, 47, 35, 23, 12, 34, 48, 49, 46, 41, 33, 30, 29, 31, 31, 30, 29, 23, 24, 32, 33, 29, 26, 24, 25, 26, 24, 22, 24, 24, 26, 28, 28, 32, 41, 53, 88, 134, 163, 184, 197, 198, 197, 197, 192, 190, 192, 197, 198, 195, 197, 198, 196, 198, 200, 199, 200, 203, 203, 204, 202, 198, 196, 199, 205, 203, 196, 193, 194, 196, 195, 192, 193, 198, 195, 194, 195, 197, 196, 195, 194, 192, 191, 192, 195, 196, 196, 195, 188, 190, 194, 186, 181, 176, 139, 80, 31, 30, 29, 27, 24, 23, 22, 24, 24, 25, 26, 28, 31, 30, 30, 31, 30, 28, 26, 25, 24, 23, 22, 21, 19, 20, 22, 22, 22, 22, 27, 25, 27, 27, 24, 22, 22, 30, 59, 76, 56, 40, 35, 33, 30, 24, 24, 22, 21, 20, 20, 20, 16, 18, 30, 36, 34, 29, 33, 44, 73, 87, 87, 67, 47, 35, 28, 21, 21, 15, 12, 28, 40, 54, 82, 23, 23, 23, 23, 23, 23, 23, 24, 24, 22, 23, 23, 20, 19, 22, 24, 21, 17, 18, 20, 21, 22, 21, 21, 24, 25, 24, 21, 19, 19, 23, 22, 22, 23, 25, 25, 22, 20, 20, 21, 22, 22, 22, 21, 20, 22, 25, 27, 26, 22, 23, 27, 30, 29, 29, 28, 27, 27, 26, 25, 22, 19, 21, 28, 31, 25, 22, 23, 25, 24, 23, 24, 24, 26, 27, 17, 15, 18, 20, 22, 29, 43, 54, 59, 59, 57, 52, 43, 32, 23, 36, 46, 45, 43, 38, 32, 29, 29, 29, 27, 27, 27, 25, 26, 32, 32, 29, 27, 25, 25, 25, 25, 24, 29, 28, 28, 28, 27, 28, 36, 45, 81, 131, 162, 184, 195, 195, 195, 203, 196, 190, 189, 193, 195, 193, 196, 199, 197, 199, 199, 196, 197, 203, 204, 204, 202, 199, 197, 199, 204, 202, 194, 193, 195, 197, 196, 193, 194, 198, 195, 194, 195, 196, 196, 194, 193, 191, 190, 191, 194, 195, 195, 194, 187, 190, 193, 186, 183, 178, 141, 82, 34, 35, 34, 31, 27, 23, 20, 26, 27, 27, 27, 25, 27, 27, 27, 29, 26, 25, 25, 26, 26, 26, 25, 23, 21, 21, 23, 23, 22, 21, 26, 24, 25, 28, 25, 21, 19, 27, 56, 72, 50, 34, 32, 36, 37, 24, 22, 21, 20, 19, 20, 21, 18, 21, 31, 36, 32, 27, 31, 42, 71, 85, 85, 65, 46, 35, 27, 20, 17, 12, 12, 31, 47, 63, 87, 22, 22, 22, 22, 22, 22, 22, 24, 23, 20, 22, 23, 21, 18, 20, 24, 21, 19, 19, 21, 22, 22, 22, 23, 26, 27, 23, 18, 17, 19, 23, 23, 22, 22, 23, 24, 23, 22, 21, 21, 21, 21, 21, 21, 21, 23, 25, 27, 26, 23, 24, 27, 30, 31, 30, 29, 28, 26, 25, 24, 20, 17, 19, 25, 30, 27, 25, 25, 28, 25, 22, 21, 22, 24, 27, 16, 13, 14, 12, 13, 10, 17, 30, 43, 54, 55, 55, 53, 49, 42, 37, 34, 34, 32, 29, 25, 24, 26, 28, 26, 23, 23, 25, 26, 27, 31, 29, 26, 27, 25, 23, 22, 24, 25, 28, 27, 28, 28, 27, 28, 36, 38, 71, 127, 163, 184, 193, 193, 195, 206, 196, 189, 187, 190, 193, 194, 197, 199, 199, 199, 197, 192, 195, 201, 203, 204, 201, 198, 197, 200, 203, 200, 193, 193, 196, 199, 197, 193, 194, 198, 196, 194, 195, 196, 195, 194, 192, 190, 189, 190, 193, 194, 194, 193, 186, 188, 190, 185, 183, 179, 141, 82, 34, 37, 39, 37, 31, 24, 21, 26, 29, 28, 28, 27, 27, 26, 28, 29, 26, 24, 24, 25, 27, 28, 27, 25, 23, 23, 23, 24, 23, 22, 28, 25, 26, 30, 29, 24, 18, 27, 53, 65, 43, 26, 28, 34, 40, 25, 23, 20, 19, 18, 20, 20, 20, 24, 31, 35, 30, 25, 29, 39, 72, 84, 83, 64, 45, 35, 27, 20, 15, 13, 10, 14, 35, 55, 75, 98, 20, 20, 21, 21, 21, 21, 22, 23, 22, 18, 20, 23, 22, 20, 20, 25, 24, 23, 22, 23, 23, 24, 23, 24, 26, 26, 22, 19, 18, 19, 21, 21, 20, 20, 20, 21, 22, 23, 24, 24, 23, 23, 23, 24, 24, 24, 26, 28, 27, 25, 25, 27, 29, 30, 30, 29, 27, 25, 24, 24, 22, 19, 17, 18, 23, 25, 27, 29, 29, 27, 24, 21, 21, 22, 23, 20, 19, 18, 12, 6, 9, 18, 29, 39, 41, 47, 51, 52, 52, 51, 45, 38, 31, 24, 18, 20, 24, 29, 26, 23, 22, 25, 28, 27, 28, 25, 23, 25, 23, 20, 19, 21, 25, 26, 25, 27, 28, 27, 28, 36, 32, 61, 123, 164, 184, 193, 194, 199, 199, 193, 188, 188, 191, 195, 198, 196, 194, 196, 197, 193, 190, 192, 199, 203, 202, 199, 197, 198, 198, 201, 199, 193, 194, 198, 199, 196, 192, 194, 198, 196, 194, 195, 196, 195, 193, 192, 191, 189, 191, 193, 195, 194, 193, 185, 187, 188, 182, 180, 176, 138, 78, 31, 35, 40, 41, 35, 27, 21, 23, 26, 29, 29, 28, 28, 27, 27, 28, 29, 27, 23, 21, 24, 29, 30, 29, 25, 25, 26, 26, 25, 24, 30, 25, 27, 32, 30, 24, 17, 26, 47, 52, 31, 18, 23, 29, 35, 26, 24, 22, 18, 17, 17, 18, 20, 25, 30, 33, 27, 22, 28, 41, 74, 85, 82, 64, 46, 37, 29, 21, 15, 12, 18, 38, 61, 87, 110, 19, 20, 20, 20, 21, 21, 22, 22, 19, 16, 19, 23, 24, 22, 22, 23, 23, 23, 23, 22, 22, 23, 24, 24, 23, 22, 23, 22, 20, 18, 20, 20, 20, 20, 20, 21, 22, 24, 25, 24, 23, 23, 24, 24, 25, 25, 26, 28, 27, 27, 27, 28, 28, 26, 26, 26, 25, 25, 25, 25, 23, 20, 17, 16, 20, 24, 26, 26, 25, 25, 25, 24, 23, 23, 22, 26, 30, 29, 21, 13, 11, 17, 23, 27, 31, 38, 47, 52, 56, 58, 62, 61, 53, 43, 33, 29, 27, 28, 26, 22, 21, 25, 27, 25, 24, 21, 21, 24, 23, 19, 19, 21, 25, 29, 28, 29, 29, 25, 25, 32, 28, 59, 125, 166, 185, 191, 192, 198, 194, 191, 189, 189, 192, 195, 198, 194, 190, 192, 194, 192, 188, 191, 199, 201, 199, 196, 195, 196, 196, 197, 197, 195, 197, 200, 200, 194, 190, 192, 198, 196, 194, 194, 195, 194, 192, 192, 192, 191, 192, 194, 196, 196, 195, 188, 188, 189, 182, 179, 174, 134, 74, 28, 33, 41, 44, 37, 25, 19, 20, 23, 28, 30, 27, 23, 21, 21, 25, 29, 29, 22, 16, 21, 31, 32, 30, 27, 27, 28, 28, 26, 26, 28, 23, 24, 29, 28, 21, 14, 19, 33, 32, 14, 11, 22, 26, 29, 27, 24, 21, 19, 18, 18, 18, 20, 24, 29, 31, 26, 22, 30, 44, 75, 83, 79, 60, 44, 36, 29, 22, 16, 16, 26, 42, 67, 98, 121, 19, 19, 20, 21, 21, 22, 22, 22, 18, 16, 19, 23, 23, 23, 24, 21, 21, 22, 22, 20, 20, 21, 23, 23, 20, 20, 22, 24, 22, 19, 20, 21, 22, 22, 22, 22, 23, 24, 23, 23, 23, 23, 23, 23, 23, 25, 26, 28, 28, 28, 28, 28, 27, 23, 24, 24, 25, 25, 26, 26, 21, 20, 19, 19, 21, 25, 24, 21, 21, 22, 25, 27, 27, 26, 24, 30, 35, 34, 28, 20, 17, 20, 22, 20, 24, 30, 38, 45, 50, 53, 58, 62, 60, 53, 43, 35, 27, 24, 27, 23, 22, 24, 25, 22, 20, 20, 22, 24, 23, 21, 22, 24, 26, 27, 26, 29, 29, 26, 26, 32, 29, 61, 128, 167, 185, 189, 190, 195, 193, 191, 191, 192, 193, 194, 196, 191, 187, 189, 191, 190, 188, 190, 198, 199, 196, 194, 193, 194, 194, 194, 195, 197, 199, 201, 199, 193, 189, 192, 198, 196, 194, 194, 195, 193, 192, 191, 193, 192, 193, 196, 197, 197, 196, 192, 191, 191, 183, 179, 173, 132, 72, 28, 33, 43, 46, 37, 23, 18, 20, 25, 30, 32, 27, 22, 18, 17, 20, 27, 28, 21, 15, 20, 32, 32, 30, 28, 28, 29, 29, 27, 27, 28, 23, 25, 28, 27, 21, 15, 16, 23, 17, 4, 7, 22, 24, 24, 22, 21, 21, 20, 21, 21, 21, 20, 22, 27, 28, 24, 22, 31, 47, 75, 81, 73, 54, 39, 32, 27, 23, 17, 18, 33, 49, 74, 106, 125, 19, 19, 20, 21, 21, 23, 23, 22, 19, 18, 21, 24, 22, 23, 26, 18, 20, 21, 20, 18, 18, 19, 22, 23, 20, 20, 22, 24, 23, 21, 19, 21, 24, 24, 23, 23, 25, 24, 22, 22, 23, 23, 23, 22, 22, 25, 25, 27, 28, 29, 28, 27, 25, 22, 23, 24, 25, 25, 26, 27, 20, 20, 21, 21, 23, 26, 24, 19, 19, 22, 26, 28, 28, 27, 25, 33, 36, 34, 31, 26, 24, 24, 23, 17, 19, 24, 30, 35, 39, 41, 39, 42, 48, 48, 43, 35, 25, 21, 27, 23, 23, 25, 23, 19, 17, 20, 23, 23, 23, 24, 25, 26, 27, 22, 23, 26, 28, 28, 29, 36, 32, 64, 129, 167, 184, 188, 189, 193, 193, 193, 192, 192, 192, 192, 193, 191, 188, 188, 190, 190, 188, 190, 196, 197, 195, 193, 192, 193, 193, 192, 194, 198, 199, 201, 198, 192, 189, 193, 199, 196, 194, 194, 194, 193, 191, 191, 194, 192, 194, 196, 198, 198, 196, 195, 194, 192, 183, 180, 173, 130, 71, 31, 35, 45, 49, 39, 24, 18, 22, 27, 32, 31, 26, 21, 17, 17, 17, 23, 25, 20, 15, 20, 30, 30, 28, 27, 27, 28, 28, 27, 28, 30, 26, 27, 29, 27, 22, 18, 21, 25, 14, 1, 5, 20, 22, 22, 18, 19, 21, 22, 24, 24, 23, 21, 22, 25, 26, 22, 21, 32, 48, 75, 78, 68, 48, 34, 29, 25, 23, 16, 19, 40, 59, 85, 115, 125, 19, 20, 20, 21, 22, 23, 24, 23, 21, 22, 24, 24, 20, 21, 25, 16, 19, 21, 20, 18, 17, 19, 21, 22, 22, 21, 21, 22, 22, 22, 18, 20, 25, 25, 24, 23, 24, 24, 22, 23, 24, 25, 24, 23, 21, 23, 24, 25, 27, 28, 27, 25, 24, 23, 24, 24, 25, 26, 26, 27, 21, 22, 23, 21, 23, 28, 27, 22, 22, 24, 27, 28, 28, 26, 24, 36, 37, 33, 31, 30, 28, 28, 25, 19, 19, 22, 25, 28, 29, 30, 19, 18, 27, 32, 33, 31, 25, 23, 25, 23, 24, 25, 22, 17, 15, 20, 23, 22, 22, 24, 27, 27, 26, 19, 20, 25, 28, 28, 30, 38, 34, 64, 127, 165, 183, 189, 190, 194, 195, 194, 193, 191, 191, 190, 192, 193, 191, 189, 190, 191, 190, 190, 193, 197, 196, 192, 191, 193, 194, 192, 193, 198, 199, 200, 197, 192, 190, 196, 199, 196, 194, 194, 194, 192, 191, 191, 194, 193, 194, 197, 198, 198, 196, 195, 193, 190, 182, 180, 173, 129, 71, 33, 37, 48, 53, 43, 28, 22, 23, 27, 30, 27, 22, 18, 18, 19, 18, 21, 21, 19, 17, 19, 24, 25, 25, 24, 25, 27, 28, 27, 27, 31, 28, 29, 29, 25, 21, 21, 34, 41, 25, 4, 5, 16, 20, 21, 17, 19, 22, 25, 26, 26, 23, 22, 22, 24, 25, 21, 20, 32, 49, 77, 78, 65, 44, 29, 27, 25, 22, 14, 17, 45, 70, 99, 122, 121, 20, 20, 21, 22, 23, 23, 24, 24, 24, 25, 26, 24, 19, 19, 24, 17, 20, 23, 21, 19, 18, 19, 21, 22, 24, 24, 20, 18, 20, 23, 15, 18, 23, 24, 23, 21, 22, 23, 23, 25, 27, 28, 27, 24, 23, 22, 22, 23, 25, 26, 26, 23, 23, 25, 25, 25, 26, 26, 27, 27, 25, 26, 22, 17, 20, 29, 32, 29, 28, 28, 29, 28, 26, 23, 21, 40, 43, 37, 33, 34, 33, 31, 28, 26, 25, 26, 26, 27, 29, 29, 15, 12, 19, 23, 26, 29, 29, 30, 24, 23, 24, 25, 21, 16, 15, 20, 21, 19, 20, 23, 27, 26, 24, 25, 25, 27, 29, 27, 27, 32, 29, 61, 124, 162, 182, 191, 194, 198, 195, 193, 191, 189, 190, 191, 194, 195, 192, 190, 191, 193, 191, 190, 192, 198, 195, 193, 192, 194, 193, 191, 192, 197, 198, 200, 197, 192, 192, 199, 200, 196, 194, 194, 194, 192, 190, 191, 193, 192, 193, 196, 198, 197, 196, 192, 190, 187, 180, 178, 171, 128, 70, 33, 36, 49, 57, 48, 33, 29, 19, 19, 20, 18, 14, 13, 16, 20, 22, 21, 19, 18, 18, 18, 17, 21, 22, 21, 24, 25, 28, 27, 26, 28, 26, 27, 26, 21, 18, 19, 49, 62, 43, 14, 7, 12, 15, 18, 18, 20, 24, 27, 27, 26, 22, 22, 24, 25, 25, 20, 20, 32, 47, 78, 80, 66, 44, 30, 27, 25, 22, 11, 15, 48, 80, 109, 126, 115, 26, 26, 23, 20, 22, 27, 30, 27, 22, 23, 28, 28, 24, 20, 22, 18, 19, 21, 24, 26, 25, 21, 23, 26, 22, 19, 18, 19, 20, 19, 18, 20, 23, 23, 20, 19, 19, 23, 29, 26, 24, 25, 25, 24, 21, 17, 21, 23, 21, 20, 24, 26, 25, 24, 21, 21, 25, 29, 29, 26, 22, 22, 22, 23, 28, 30, 28, 28, 29, 35, 36, 32, 31, 32, 30, 33, 34, 30, 24, 24, 31, 32, 28, 30, 30, 30, 29, 29, 28, 27, 29, 29, 26, 25, 27, 30, 29, 28, 26, 23, 21, 21, 22, 24, 25, 27, 26, 22, 18, 19, 25, 26, 25, 24, 22, 23, 29, 29, 30, 37, 38, 72, 132, 167, 184, 193, 197, 199, 200, 197, 196, 196, 197, 197, 198, 197, 194, 192, 193, 193, 191, 192, 196, 204, 200, 196, 194, 195, 196, 196, 199, 204, 202, 202, 199, 192, 190, 194, 198, 198, 198, 196, 194, 196, 201, 202, 200, 199, 195, 192, 195, 199, 199, 199, 201, 195, 192, 184, 164, 119, 55, 17, 24, 38, 49, 48, 40, 37, 29, 24, 24, 28, 26, 18, 16, 20, 29, 20, 19, 23, 21, 16, 18, 24, 25, 23, 24, 26, 28, 28, 26, 21, 15, 25, 25, 17, 20, 21, 47, 57, 37, 13, 13, 20, 24, 25, 8, 14, 17, 17, 19, 20, 16, 16, 18, 24, 29, 26, 22, 36, 56, 86, 76, 59, 41, 30, 23, 18, 13, 6, 18, 55, 92, 110, 116, 119, 25, 27, 23, 20, 21, 27, 29, 26, 22, 23, 28, 30, 26, 23, 23, 23, 21, 22, 24, 26, 25, 22, 22, 24, 21, 18, 19, 21, 23, 23, 18, 20, 22, 22, 19, 18, 18, 21, 26, 24, 22, 23, 23, 23, 21, 18, 23, 25, 20, 20, 24, 26, 25, 25, 22, 22, 26, 29, 29, 25, 23, 24, 24, 25, 27, 25, 23, 24, 27, 32, 32, 28, 29, 32, 32, 31, 32, 29, 23, 24, 31, 31, 28, 31, 31, 31, 30, 29, 27, 27, 27, 26, 24, 23, 24, 26, 28, 28, 25, 22, 20, 21, 24, 26, 27, 25, 23, 21, 17, 18, 24, 25, 23, 25, 23, 25, 31, 31, 31, 37, 39, 74, 134, 168, 184, 193, 197, 200, 199, 198, 196, 196, 198, 200, 200, 199, 195, 194, 194, 194, 191, 193, 198, 202, 199, 196, 195, 195, 196, 196, 200, 205, 203, 202, 199, 191, 189, 192, 198, 198, 196, 196, 197, 199, 203, 203, 200, 200, 195, 191, 194, 197, 198, 201, 205, 197, 195, 185, 163, 119, 56, 20, 26, 37, 47, 46, 38, 34, 32, 28, 27, 32, 29, 20, 17, 21, 30, 22, 23, 25, 21, 17, 20, 26, 26, 24, 24, 26, 27, 27, 25, 21, 16, 26, 27, 18, 22, 31, 57, 62, 38, 15, 16, 22, 25, 30, 12, 15, 15, 14, 18, 20, 15, 15, 18, 23, 28, 25, 22, 39, 62, 84, 74, 59, 42, 28, 20, 17, 13, 10, 9, 32, 76, 110, 118, 117, 120, 23, 26, 24, 21, 22, 25, 25, 24, 23, 24, 28, 30, 27, 25, 26, 27, 25, 22, 22, 24, 24, 23, 22, 21, 20, 20, 21, 23, 26, 27, 17, 18, 21, 20, 19, 18, 18, 20, 22, 22, 22, 22, 22, 22, 22, 21, 25, 26, 22, 20, 24, 25, 25, 27, 24, 23, 26, 28, 27, 24, 23, 24, 25, 24, 24, 22, 23, 24, 25, 29, 28, 25, 27, 32, 33, 30, 30, 28, 25, 26, 30, 30, 27, 31, 30, 30, 29, 28, 27, 27, 20, 18, 21, 22, 21, 22, 26, 28, 22, 21, 20, 21, 24, 26, 26, 21, 19, 20, 19, 20, 25, 24, 21, 25, 25, 27, 31, 31, 29, 32, 37, 74, 134, 167, 184, 193, 197, 199, 197, 196, 195, 196, 197, 200, 202, 199, 195, 194, 195, 194, 191, 193, 198, 198, 196, 195, 196, 196, 196, 194, 198, 204, 202, 201, 198, 191, 188, 192, 199, 197, 194, 196, 199, 201, 201, 200, 197, 197, 194, 191, 193, 196, 196, 200, 204, 195, 193, 183, 164, 121, 60, 26, 30, 38, 44, 42, 34, 30, 32, 31, 30, 32, 27, 19, 18, 21, 28, 25, 27, 28, 21, 18, 24, 28, 27, 26, 24, 26, 26, 25, 24, 23, 21, 27, 30, 22, 26, 46, 72, 68, 39, 17, 17, 22, 25, 32, 20, 18, 13, 13, 19, 23, 18, 19, 21, 24, 26, 23, 23, 43, 67, 81, 74, 62, 43, 27, 18, 15, 8, 12, 46, 94, 124, 124, 119, 121, 24, 26, 25, 22, 23, 24, 23, 24, 25, 25, 28, 29, 27, 26, 29, 31, 27, 23, 21, 22, 23, 24, 23, 21, 22, 23, 23, 23, 25, 28, 17, 18, 20, 20, 19, 18, 19, 20, 20, 23, 24, 23, 23, 23, 24, 24, 27, 27, 23, 21, 23, 23, 25, 28, 25, 23, 25, 26, 24, 21, 19, 20, 24, 23, 23, 22, 27, 29, 25, 28, 27, 26, 28, 32, 35, 29, 26, 27, 26, 28, 30, 27, 25, 30, 29, 28, 27, 26, 26, 26, 18, 17, 21, 23, 21, 20, 23, 26, 20, 19, 20, 22, 25, 26, 26, 19, 17, 20, 21, 22, 27, 25, 22, 24, 24, 26, 29, 29, 27, 28, 34, 75, 134, 167, 183, 193, 196, 199, 196, 194, 194, 195, 197, 200, 201, 200, 196, 195, 195, 194, 192, 193, 199, 195, 194, 194, 196, 197, 196, 193, 197, 203, 201, 201, 198, 191, 188, 191, 199, 196, 193, 196, 200, 201, 200, 198, 194, 194, 193, 191, 193, 194, 195, 197, 201, 191, 190, 181, 163, 120, 59, 25, 29, 36, 40, 38, 33, 31, 33, 32, 32, 29, 23, 16, 18, 22, 26, 26, 29, 30, 23, 20, 26, 30, 28, 26, 25, 26, 26, 25, 23, 25, 26, 28, 32, 26, 29, 61, 85, 72, 38, 16, 18, 20, 24, 32, 24, 19, 12, 13, 20, 25, 22, 24, 25, 25, 26, 24, 27, 49, 73, 80, 77, 64, 45, 26, 15, 12, 5, 14, 53, 101, 126, 123, 118, 121, 27, 29, 27, 24, 23, 25, 24, 25, 27, 25, 27, 28, 25, 25, 28, 30, 27, 24, 22, 22, 24, 26, 25, 23, 26, 26, 23, 20, 21, 24, 18, 19, 21, 21, 20, 20, 21, 22, 22, 26, 28, 26, 24, 25, 27, 27, 27, 26, 23, 22, 22, 22, 23, 28, 25, 23, 23, 23, 21, 18, 16, 20, 24, 25, 22, 23, 30, 32, 26, 28, 28, 29, 30, 32, 33, 27, 26, 27, 28, 30, 30, 27, 24, 28, 26, 25, 24, 24, 24, 25, 21, 22, 25, 26, 24, 21, 21, 21, 18, 18, 20, 23, 26, 26, 25, 19, 19, 22, 23, 25, 27, 27, 24, 26, 26, 25, 27, 29, 29, 29, 34, 74, 135, 167, 183, 194, 196, 199, 195, 193, 194, 194, 196, 198, 200, 198, 196, 195, 195, 194, 192, 194, 199, 194, 194, 194, 195, 197, 196, 194, 197, 202, 201, 202, 199, 192, 188, 191, 196, 196, 194, 196, 198, 201, 199, 196, 193, 193, 193, 193, 193, 194, 195, 194, 197, 188, 187, 178, 159, 116, 53, 19, 23, 31, 36, 36, 35, 37, 32, 33, 32, 27, 19, 12, 16, 22, 26, 26, 29, 30, 26, 23, 26, 28, 27, 25, 25, 26, 26, 26, 24, 27, 30, 28, 31, 26, 32, 74, 94, 74, 37, 15, 16, 19, 23, 33, 21, 17, 13, 13, 19, 25, 26, 26, 25, 26, 24, 24, 29, 53, 75, 86, 79, 65, 44, 26, 14, 13, 10, 5, 16, 53, 97, 119, 117, 115, 123, 28, 30, 26, 21, 21, 24, 24, 26, 29, 26, 26, 26, 23, 22, 25, 25, 24, 25, 24, 24, 25, 26, 25, 24, 26, 26, 22, 19, 19, 22, 20, 21, 22, 22, 21, 21, 23, 24, 25, 28, 29, 27, 24, 25, 27, 27, 25, 24, 22, 22, 20, 20, 23, 29, 27, 25, 24, 23, 21, 19, 24, 28, 30, 27, 22, 20, 25, 28, 25, 26, 28, 31, 31, 29, 28, 28, 28, 29, 32, 34, 33, 30, 28, 25, 25, 24, 23, 23, 24, 24, 24, 24, 24, 25, 25, 23, 19, 16, 19, 19, 22, 25, 27, 26, 24, 21, 22, 24, 22, 22, 26, 27, 26, 33, 31, 28, 28, 33, 37, 38, 38, 75, 135, 169, 183, 194, 197, 199, 196, 195, 194, 194, 196, 198, 198, 198, 195, 194, 195, 194, 192, 193, 199, 197, 195, 195, 195, 197, 198, 197, 199, 201, 201, 203, 201, 194, 191, 193, 194, 196, 196, 196, 196, 197, 199, 198, 194, 194, 194, 194, 194, 192, 195, 193, 198, 190, 189, 180, 157, 111, 49, 19, 23, 31, 35, 35, 37, 40, 33, 32, 33, 25, 17, 15, 17, 22, 26, 24, 25, 29, 28, 25, 24, 26, 26, 24, 24, 26, 28, 27, 26, 29, 32, 28, 28, 25, 36, 82, 103, 83, 45, 20, 21, 22, 25, 34, 17, 16, 16, 15, 16, 20, 24, 24, 22, 23, 22, 23, 31, 54, 73, 89, 78, 61, 42, 28, 19, 14, 13, 25, 57, 97, 118, 120, 120, 127, 28, 28, 24, 19, 19, 23, 23, 25, 28, 24, 25, 24, 22, 21, 23, 21, 23, 25, 26, 25, 25, 26, 25, 23, 24, 23, 21, 20, 21, 23, 21, 23, 23, 23, 21, 22, 24, 26, 26, 27, 27, 25, 23, 24, 25, 26, 23, 21, 22, 22, 20, 20, 23, 30, 29, 27, 26, 25, 24, 22, 25, 28, 30, 28, 24, 23, 26, 28, 26, 27, 30, 34, 33, 29, 27, 28, 26, 26, 30, 32, 31, 29, 28, 24, 25, 25, 25, 24, 24, 24, 23, 22, 20, 22, 25, 24, 19, 15, 21, 21, 22, 25, 27, 26, 24, 22, 23, 24, 21, 20, 24, 28, 28, 33, 30, 26, 26, 32, 39, 40, 40, 77, 137, 170, 185, 195, 197, 199, 198, 197, 195, 195, 196, 197, 198, 197, 195, 193, 195, 194, 191, 193, 198, 200, 198, 196, 196, 197, 199, 198, 199, 201, 202, 203, 201, 195, 192, 193, 193, 196, 197, 196, 194, 194, 198, 200, 196, 195, 195, 194, 192, 191, 195, 194, 199, 192, 192, 182, 157, 108, 49, 25, 28, 34, 36, 33, 34, 38, 33, 33, 34, 26, 19, 18, 19, 22, 27, 23, 23, 27, 28, 26, 23, 25, 25, 23, 24, 26, 28, 28, 28, 30, 32, 28, 26, 25, 42, 87, 108, 93, 58, 28, 26, 29, 30, 35, 18, 19, 20, 18, 14, 15, 21, 22, 22, 25, 24, 26, 36, 58, 75, 89, 76, 58, 42, 32, 25, 19, 19, 33, 65, 103, 123, 123, 122, 124, 25, 26, 23, 19, 19, 22, 22, 24, 25, 23, 24, 25, 22, 21, 23, 19, 22, 26, 26, 25, 24, 25, 25, 23, 22, 21, 21, 22, 23, 25, 23, 24, 24, 23, 21, 22, 24, 25, 25, 24, 22, 22, 22, 24, 25, 26, 21, 19, 22, 24, 22, 22, 25, 29, 28, 28, 27, 26, 25, 25, 23, 24, 27, 28, 27, 27, 28, 29, 28, 28, 31, 36, 35, 31, 29, 29, 25, 22, 26, 29, 28, 28, 29, 24, 26, 27, 28, 27, 26, 25, 23, 21, 20, 22, 25, 24, 20, 18, 23, 23, 23, 26, 27, 26, 24, 22, 23, 25, 22, 20, 25, 31, 31, 30, 27, 23, 23, 29, 37, 37, 38, 78, 138, 171, 187, 196, 199, 200, 199, 197, 196, 195, 196, 197, 198, 197, 194, 192, 193, 193, 190, 192, 197, 201, 199, 198, 197, 198, 199, 198, 198, 201, 201, 203, 201, 196, 192, 194, 194, 195, 196, 194, 192, 193, 198, 201, 199, 195, 195, 194, 191, 190, 194, 195, 200, 193, 193, 182, 156, 108, 49, 29, 32, 36, 35, 31, 30, 35, 32, 33, 33, 26, 21, 22, 20, 21, 27, 24, 23, 25, 26, 26, 23, 25, 25, 24, 24, 26, 27, 27, 28, 31, 31, 28, 24, 25, 51, 90, 107, 98, 68, 35, 29, 36, 37, 38, 22, 22, 22, 20, 14, 13, 19, 23, 24, 27, 25, 29, 40, 63, 79, 88, 77, 59, 45, 34, 28, 23, 25, 42, 74, 110, 127, 126, 121, 120, 23, 25, 24, 21, 21, 23, 21, 22, 23, 21, 24, 25, 23, 23, 25, 21, 24, 26, 25, 23, 21, 23, 25, 25, 22, 20, 21, 24, 26, 27, 24, 24, 24, 22, 20, 21, 23, 25, 25, 21, 19, 20, 23, 25, 26, 26, 20, 18, 22, 25, 24, 24, 26, 25, 26, 26, 25, 25, 24, 25, 22, 22, 26, 28, 29, 29, 28, 28, 29, 26, 30, 35, 36, 33, 32, 31, 25, 21, 24, 27, 26, 28, 31, 25, 27, 30, 31, 30, 28, 26, 24, 24, 25, 26, 26, 25, 24, 24, 26, 25, 24, 25, 27, 26, 25, 21, 23, 26, 24, 23, 28, 34, 34, 27, 24, 20, 20, 27, 34, 32, 36, 80, 140, 172, 188, 197, 201, 201, 199, 197, 196, 196, 197, 198, 200, 198, 193, 192, 192, 192, 189, 191, 196, 200, 199, 199, 200, 200, 198, 196, 196, 199, 199, 202, 201, 196, 192, 194, 197, 195, 193, 191, 192, 194, 197, 200, 202, 196, 194, 193, 189, 188, 193, 195, 199, 191, 190, 180, 155, 108, 49, 28, 31, 35, 33, 28, 28, 33, 30, 32, 31, 24, 22, 24, 21, 20, 28, 27, 25, 24, 24, 24, 24, 27, 27, 24, 24, 26, 27, 26, 27, 32, 29, 29, 23, 27, 59, 93, 101, 96, 71, 38, 30, 41, 42, 40, 28, 24, 22, 21, 17, 16, 21, 24, 24, 26, 24, 27, 41, 65, 80, 88, 80, 65, 49, 35, 26, 22, 29, 50, 83, 116, 129, 125, 119, 118, 22, 26, 26, 25, 24, 25, 23, 21, 20, 20, 24, 26, 25, 25, 27, 23, 25, 25, 24, 21, 20, 22, 26, 28, 23, 20, 22, 25, 26, 26, 24, 24, 23, 22, 19, 20, 22, 24, 24, 19, 17, 19, 24, 27, 28, 26, 19, 17, 23, 27, 25, 26, 26, 22, 22, 23, 23, 22, 23, 24, 26, 27, 27, 28, 29, 27, 23, 22, 26, 21, 24, 30, 32, 31, 32, 34, 28, 24, 25, 28, 28, 31, 35, 24, 27, 30, 32, 31, 28, 26, 27, 30, 33, 32, 28, 26, 28, 30, 28, 26, 25, 26, 27, 27, 25, 22, 25, 29, 28, 28, 32, 37, 38, 26, 25, 22, 21, 28, 32, 29, 35, 82, 141, 173, 188, 198, 202, 202, 198, 196, 194, 195, 198, 200, 201, 197, 192, 191, 192, 191, 189, 191, 196, 198, 199, 200, 202, 201, 198, 194, 193, 197, 198, 200, 199, 195, 191, 193, 201, 194, 189, 189, 192, 196, 195, 198, 203, 196, 193, 191, 186, 186, 192, 193, 197, 188, 186, 176, 153, 108, 48, 23, 26, 31, 31, 27, 27, 33, 29, 29, 28, 22, 21, 25, 22, 19, 28, 30, 28, 23, 21, 24, 26, 29, 28, 25, 25, 26, 26, 25, 25, 33, 28, 29, 21, 28, 66, 96, 92, 88, 68, 34, 28, 42, 43, 40, 32, 24, 20, 22, 21, 21, 25, 24, 21, 21, 18, 22, 37, 62, 78, 89, 84, 71, 53, 34, 23, 19, 31, 57, 90, 119, 127, 122, 119, 120, 28, 26, 22, 22, 23, 25, 26, 24, 23, 23, 24, 24, 23, 23, 22, 25, 20, 21, 27, 27, 23, 22, 25, 25, 21, 18, 20, 21, 22, 21, 18, 19, 20, 21, 21, 22, 24, 25, 25, 23, 20, 19, 20, 22, 23, 20, 20, 22, 25, 22, 20, 26, 32, 26, 17, 18, 25, 26, 24, 25, 25, 24, 24, 25, 26, 27, 25, 24, 25, 27, 28, 29, 28, 30, 33, 28, 25, 25, 24, 24, 25, 29, 31, 23, 26, 28, 30, 30, 28, 26, 25, 25, 26, 27, 29, 31, 33, 34, 31, 27, 27, 29, 29, 29, 31, 30, 29, 28, 27, 28, 32, 36, 38, 30, 27, 26, 28, 29, 30, 33, 43, 86, 144, 174, 189, 198, 199, 200, 198, 194, 190, 192, 195, 199, 201, 195, 187, 189, 193, 194, 192, 194, 200, 200, 198, 195, 196, 197, 197, 196, 196, 196, 198, 199, 198, 196, 194, 194, 202, 197, 189, 190, 193, 195, 193, 195, 200, 196, 192, 188, 184, 185, 186, 191, 197, 194, 183, 172, 155, 104, 43, 17, 26, 33, 31, 26, 25, 27, 30, 30, 26, 23, 18, 20, 22, 23, 29, 30, 29, 24, 21, 23, 26, 27, 27, 27, 28, 29, 27, 23, 23, 38, 32, 28, 17, 28, 68, 93, 95, 83, 59, 38, 31, 37, 37, 34, 31, 25, 20, 20, 21, 22, 21, 27, 29, 26, 21, 25, 40, 62, 75, 85, 74, 56, 47, 40, 26, 23, 38, 62, 93, 121, 127, 118, 112, 117, 25, 24, 23, 23, 26, 26, 26, 25, 24, 24, 24, 23, 22, 21, 20, 20, 26, 27, 23, 21, 24, 24, 24, 24, 20, 18, 19, 21, 22, 21, 22, 23, 24, 24, 22, 23, 24, 24, 24, 22, 20, 19, 20, 21, 23, 21, 21, 22, 24, 23, 24, 31, 39, 35, 22, 21, 26, 26, 23, 25, 27, 27, 28, 28, 29, 29, 28, 26, 26, 28, 30, 30, 29, 29, 30, 28, 26, 25, 25, 24, 26, 29, 30, 27, 28, 29, 30, 30, 30, 30, 26, 25, 25, 27, 29, 31, 32, 33, 30, 27, 27, 29, 28, 28, 31, 31, 29, 28, 28, 30, 31, 34, 37, 35, 30, 27, 28, 28, 28, 32, 44, 88, 146, 176, 190, 199, 200, 200, 199, 195, 191, 192, 195, 199, 200, 197, 194, 195, 196, 194, 191, 193, 200, 200, 198, 195, 195, 196, 197, 197, 196, 195, 196, 197, 196, 196, 196, 196, 202, 198, 191, 191, 193, 194, 192, 195, 200, 196, 191, 187, 184, 184, 185, 189, 195, 198, 187, 175, 154, 99, 39, 17, 26, 32, 30, 24, 22, 25, 25, 26, 26, 26, 22, 21, 21, 22, 26, 27, 26, 23, 21, 22, 24, 25, 25, 26, 28, 30, 28, 25, 24, 31, 27, 22, 13, 29, 71, 94, 94, 80, 57, 39, 34, 36, 34, 31, 28, 22, 16, 16, 19, 22, 23, 25, 27, 25, 22, 28, 44, 65, 75, 85, 70, 55, 45, 36, 27, 27, 39, 60, 92, 120, 126, 115, 110, 114, 23, 23, 24, 26, 28, 26, 23, 23, 24, 24, 24, 23, 22, 21, 20, 16, 28, 32, 25, 20, 22, 24, 24, 23, 20, 18, 19, 21, 22, 21, 26, 27, 26, 25, 23, 23, 23, 24, 25, 23, 21, 20, 21, 23, 25, 24, 22, 21, 23, 24, 27, 34, 42, 40, 27, 23, 26, 25, 22, 24, 29, 29, 29, 29, 30, 29, 28, 27, 27, 29, 31, 30, 29, 28, 28, 28, 27, 24, 24, 25, 27, 28, 28, 28, 28, 28, 28, 28, 29, 30, 26, 24, 25, 27, 29, 29, 30, 30, 28, 27, 27, 29, 27, 26, 30, 30, 29, 29, 30, 31, 32, 33, 35, 37, 32, 27, 27, 27, 28, 34, 45, 89, 147, 178, 191, 199, 200, 200, 200, 195, 191, 191, 194, 197, 198, 200, 200, 198, 197, 193, 189, 192, 199, 201, 198, 195, 195, 196, 197, 197, 195, 194, 195, 195, 194, 195, 196, 197, 200, 198, 193, 191, 192, 192, 190, 194, 201, 197, 192, 187, 184, 184, 185, 188, 193, 197, 188, 176, 154, 98, 39, 18, 25, 30, 28, 22, 21, 23, 20, 21, 24, 25, 24, 23, 21, 21, 24, 24, 24, 24, 23, 23, 23, 22, 22, 23, 26, 29, 29, 27, 24, 25, 23, 17, 11, 33, 75, 94, 91, 76, 55, 40, 37, 36, 33, 29, 24, 19, 13, 13, 17, 23, 26, 24, 23, 23, 22, 31, 49, 70, 78, 84, 65, 55, 43, 30, 28, 33, 41, 60, 92, 119, 125, 115, 109, 111, 23, 24, 26, 28, 28, 25, 20, 21, 24, 25, 24, 23, 22, 21, 20, 17, 25, 35, 37, 28, 19, 21, 25, 24, 22, 20, 20, 20, 20, 20, 27, 27, 24, 24, 23, 24, 23, 24, 26, 24, 22, 22, 23, 25, 27, 26, 22, 19, 22, 25, 27, 32, 39, 39, 27, 23, 25, 24, 22, 24, 28, 28, 29, 29, 28, 27, 26, 26, 28, 30, 30, 29, 27, 27, 27, 28, 26, 22, 22, 26, 28, 27, 25, 27, 26, 25, 25, 25, 27, 28, 25, 23, 26, 28, 29, 28, 27, 26, 26, 26, 28, 28, 25, 25, 30, 30, 29, 30, 31, 32, 34, 34, 33, 37, 30, 26, 27, 27, 29, 36, 46, 89, 147, 178, 191, 199, 200, 200, 200, 194, 190, 190, 192, 194, 195, 199, 201, 199, 196, 192, 189, 191, 199, 201, 198, 196, 195, 196, 197, 196, 195, 193, 194, 194, 192, 194, 196, 199, 199, 198, 194, 192, 191, 189, 188, 193, 201, 198, 192, 187, 184, 184, 186, 187, 190, 193, 186, 175, 154, 101, 42, 19, 24, 27, 24, 20, 19, 20, 19, 19, 21, 22, 23, 23, 23, 23, 24, 23, 24, 25, 26, 25, 23, 20, 20, 21, 24, 27, 28, 27, 26, 26, 23, 15, 11, 38, 78, 91, 85, 72, 53, 42, 39, 37, 32, 27, 22, 17, 12, 13, 18, 25, 29, 26, 23, 24, 23, 35, 55, 75, 80, 83, 58, 52, 43, 27, 31, 38, 43, 62, 92, 117, 122, 113, 108, 110, 25, 25, 26, 28, 27, 23, 19, 20, 24, 24, 24, 23, 22, 21, 20, 24, 20, 37, 56, 43, 18, 18, 28, 26, 24, 22, 20, 20, 19, 19, 23, 23, 21, 21, 22, 23, 24, 24, 27, 26, 24, 24, 25, 27, 29, 27, 21, 18, 21, 23, 24, 26, 31, 31, 23, 21, 24, 24, 22, 23, 26, 28, 29, 29, 25, 24, 24, 25, 31, 30, 28, 27, 26, 26, 26, 28, 25, 20, 21, 26, 29, 26, 23, 24, 23, 23, 23, 23, 24, 24, 24, 24, 27, 28, 28, 27, 24, 23, 26, 27, 29, 29, 25, 24, 30, 31, 30, 32, 33, 34, 35, 34, 32, 34, 27, 25, 27, 28, 29, 34, 44, 87, 145, 175, 191, 198, 199, 199, 200, 194, 190, 189, 190, 192, 193, 195, 196, 196, 195, 193, 190, 192, 200, 202, 199, 196, 195, 196, 197, 196, 195, 193, 193, 192, 191, 193, 196, 199, 199, 198, 195, 192, 188, 186, 186, 192, 201, 198, 192, 187, 185, 185, 186, 187, 188, 188, 181, 172, 154, 104, 49, 19, 23, 24, 21, 18, 17, 18, 22, 21, 16, 17, 18, 21, 24, 25, 24, 23, 24, 27, 29, 28, 24, 20, 19, 19, 21, 24, 26, 25, 25, 30, 27, 14, 12, 43, 78, 84, 79, 67, 50, 42, 41, 38, 30, 25, 20, 17, 15, 16, 21, 27, 31, 28, 27, 27, 25, 37, 59, 77, 80, 80, 50, 47, 43, 30, 37, 42, 45, 64, 90, 111, 116, 109, 106, 110, 25, 24, 23, 25, 26, 24, 22, 22, 23, 24, 24, 24, 23, 22, 21, 30, 23, 37, 59, 50, 25, 21, 26, 23, 23, 22, 21, 21, 21, 22, 24, 21, 18, 18, 20, 22, 23, 24, 27, 26, 24, 23, 24, 26, 28, 24, 19, 18, 22, 25, 23, 23, 25, 24, 21, 22, 25, 26, 23, 21, 26, 28, 31, 31, 27, 25, 26, 27, 33, 29, 25, 24, 24, 24, 26, 26, 23, 19, 20, 25, 27, 25, 21, 20, 22, 23, 24, 23, 22, 20, 24, 27, 29, 30, 31, 29, 26, 25, 27, 27, 29, 30, 27, 26, 30, 29, 28, 31, 32, 32, 32, 31, 29, 31, 26, 26, 28, 27, 27, 29, 40, 85, 143, 174, 189, 198, 199, 200, 202, 195, 191, 190, 191, 192, 192, 193, 193, 194, 197, 195, 192, 193, 200, 202, 199, 196, 195, 196, 196, 195, 194, 192, 192, 191, 190, 192, 196, 199, 198, 197, 195, 191, 186, 184, 183, 190, 201, 198, 192, 187, 184, 183, 185, 187, 187, 187, 182, 172, 151, 101, 47, 18, 21, 22, 19, 17, 17, 19, 23, 22, 17, 15, 19, 22, 23, 23, 23, 22, 23, 27, 29, 27, 24, 21, 20, 18, 19, 21, 23, 23, 24, 32, 28, 13, 14, 45, 73, 77, 75, 64, 49, 42, 43, 37, 29, 23, 19, 19, 19, 19, 22, 26, 28, 30, 32, 29, 24, 36, 59, 77, 76, 74, 42, 41, 44, 37, 43, 42, 44, 63, 85, 100, 105, 102, 105, 108, 22, 21, 20, 22, 25, 26, 26, 23, 22, 23, 24, 24, 24, 23, 22, 26, 26, 32, 38, 38, 29, 22, 19, 19, 21, 22, 22, 23, 24, 27, 28, 25, 20, 19, 21, 22, 22, 23, 26, 24, 22, 21, 22, 23, 25, 20, 18, 19, 25, 26, 24, 25, 27, 24, 23, 25, 27, 26, 23, 20, 23, 27, 29, 29, 26, 23, 25, 28, 32, 28, 23, 22, 22, 23, 24, 24, 21, 18, 20, 24, 26, 25, 21, 21, 23, 25, 26, 25, 23, 20, 26, 30, 32, 32, 32, 30, 29, 28, 27, 26, 29, 31, 29, 27, 29, 27, 26, 28, 30, 30, 29, 28, 26, 30, 26, 26, 28, 26, 24, 25, 40, 88, 144, 174, 187, 197, 199, 201, 204, 198, 193, 192, 194, 194, 194, 195, 195, 196, 199, 197, 193, 194, 199, 202, 200, 196, 195, 196, 196, 195, 193, 190, 191, 191, 191, 192, 196, 198, 199, 197, 194, 191, 188, 184, 182, 189, 202, 197, 191, 187, 184, 183, 185, 184, 185, 190, 188, 176, 148, 91, 38, 18, 20, 21, 19, 18, 17, 18, 21, 20, 20, 21, 25, 25, 23, 21, 22, 21, 22, 24, 26, 25, 23, 23, 22, 19, 19, 20, 22, 22, 22, 28, 23, 8, 16, 49, 71, 75, 74, 62, 47, 42, 44, 36, 26, 20, 18, 19, 20, 20, 21, 23, 25, 30, 33, 29, 24, 36, 60, 75, 71, 67, 38, 36, 42, 41, 46, 41, 43, 60, 79, 91, 95, 96, 101, 105, 21, 20, 20, 22, 25, 27, 26, 23, 20, 22, 23, 24, 24, 24, 24, 20, 25, 26, 23, 26, 28, 21, 15, 18, 21, 22, 23, 23, 25, 28, 30, 26, 20, 19, 22, 24, 23, 24, 27, 25, 22, 20, 20, 22, 23, 19, 18, 21, 26, 26, 24, 26, 29, 25, 25, 27, 27, 26, 24, 20, 21, 25, 28, 27, 24, 21, 24, 27, 29, 25, 22, 22, 22, 23, 22, 21, 20, 19, 21, 24, 26, 25, 24, 23, 25, 27, 27, 26, 24, 22, 27, 31, 31, 31, 31, 30, 29, 29, 28, 25, 26, 30, 31, 28, 28, 26, 26, 27, 28, 29, 28, 27, 25, 28, 24, 25, 26, 25, 23, 24, 44, 95, 149, 176, 187, 197, 199, 201, 204, 197, 192, 191, 193, 195, 195, 196, 196, 197, 199, 197, 192, 193, 199, 203, 200, 197, 195, 196, 196, 195, 192, 188, 190, 191, 191, 193, 195, 198, 201, 198, 194, 192, 190, 186, 183, 188, 201, 197, 191, 186, 182, 182, 183, 183, 185, 191, 190, 176, 144, 85, 31, 16, 19, 20, 20, 19, 18, 18, 21, 20, 21, 23, 28, 29, 25, 21, 21, 22, 22, 22, 23, 23, 23, 25, 24, 20, 19, 21, 23, 23, 23, 25, 20, 7, 22, 54, 71, 77, 76, 61, 45, 41, 44, 35, 23, 18, 19, 20, 21, 20, 20, 23, 25, 29, 32, 30, 26, 40, 65, 76, 68, 61, 36, 31, 39, 43, 45, 40, 43, 59, 77, 87, 90, 94, 100, 103, 24, 22, 21, 23, 24, 24, 23, 20, 19, 21, 23, 24, 25, 25, 26, 18, 21, 23, 21, 24, 25, 20, 17, 20, 23, 24, 23, 22, 23, 25, 29, 24, 18, 19, 23, 26, 25, 26, 29, 27, 23, 21, 21, 22, 23, 20, 20, 23, 25, 23, 22, 26, 29, 24, 25, 26, 26, 26, 24, 22, 20, 24, 29, 27, 24, 22, 25, 28, 25, 22, 23, 24, 24, 22, 19, 18, 19, 21, 23, 24, 26, 26, 27, 26, 26, 26, 26, 25, 24, 24, 27, 28, 28, 28, 28, 27, 27, 28, 28, 23, 23, 29, 31, 28, 26, 26, 28, 28, 29, 29, 28, 28, 26, 26, 21, 22, 24, 25, 25, 27, 51, 103, 156, 179, 189, 197, 200, 202, 201, 195, 190, 189, 191, 193, 194, 195, 195, 195, 196, 193, 190, 192, 200, 203, 200, 197, 195, 195, 196, 195, 191, 187, 190, 192, 192, 193, 194, 197, 203, 199, 194, 193, 193, 188, 183, 187, 200, 196, 190, 185, 181, 180, 182, 184, 184, 189, 188, 174, 142, 83, 29, 14, 18, 20, 20, 20, 19, 18, 22, 21, 20, 22, 29, 31, 29, 25, 22, 23, 23, 22, 21, 22, 24, 27, 26, 22, 21, 23, 25, 26, 26, 25, 19, 9, 28, 60, 72, 82, 79, 62, 44, 41, 43, 33, 20, 17, 22, 22, 22, 20, 20, 24, 28, 28, 30, 31, 31, 47, 72, 80, 67, 55, 37, 29, 36, 44, 43, 41, 46, 60, 78, 88, 91, 96, 102, 103, 26, 25, 24, 25, 24, 22, 19, 18, 19, 20, 22, 24, 25, 25, 26, 22, 20, 24, 30, 30, 24, 21, 22, 23, 25, 26, 23, 21, 20, 21, 25, 21, 18, 19, 23, 26, 27, 27, 30, 29, 26, 24, 23, 23, 23, 23, 23, 24, 24, 20, 19, 24, 28, 23, 24, 23, 23, 25, 24, 23, 21, 24, 29, 28, 27, 27, 28, 30, 22, 22, 24, 25, 25, 23, 19, 18, 20, 22, 24, 25, 26, 28, 29, 27, 26, 25, 24, 24, 24, 25, 26, 25, 25, 25, 24, 24, 25, 26, 29, 23, 22, 28, 31, 29, 26, 26, 28, 29, 30, 30, 31, 33, 31, 25, 20, 20, 24, 27, 29, 33, 55, 108, 159, 180, 189, 196, 200, 203, 198, 193, 188, 187, 189, 192, 193, 194, 193, 192, 192, 190, 188, 193, 200, 202, 200, 197, 196, 196, 196, 195, 192, 188, 191, 193, 193, 194, 194, 197, 204, 202, 195, 195, 194, 191, 186, 188, 199, 195, 190, 185, 182, 181, 183, 186, 185, 188, 186, 172, 142, 86, 33, 15, 18, 20, 21, 20, 19, 19, 25, 21, 18, 19, 25, 32, 33, 30, 25, 26, 25, 23, 21, 23, 26, 28, 26, 24, 23, 24, 27, 29, 29, 27, 20, 14, 35, 65, 76, 86, 81, 63, 44, 41, 42, 32, 19, 15, 26, 25, 24, 21, 21, 24, 30, 28, 27, 30, 34, 53, 77, 85, 71, 50, 39, 31, 38, 44, 41, 41, 48, 60, 79, 91, 95, 99, 104, 106, 24, 24, 28, 30, 27, 22, 21, 20, 20, 19, 20, 21, 23, 24, 24, 26, 24, 22, 24, 26, 27, 25, 22, 20, 21, 23, 25, 23, 21, 20, 19, 24, 28, 28, 23, 21, 23, 23, 22, 26, 28, 25, 22, 20, 20, 26, 26, 25, 23, 23, 25, 26, 25, 25, 23, 22, 23, 22, 20, 16, 15, 15, 16, 18, 22, 24, 27, 26, 24, 26, 26, 26, 27, 28, 30, 27, 25, 23, 22, 23, 26, 30, 31, 24, 25, 26, 27, 28, 29, 29, 26, 25, 28, 28, 26, 25, 28, 30, 36, 31, 27, 27, 29, 31, 33, 19, 16, 24, 27, 29, 37, 42, 42, 42, 32, 27, 31, 36, 36, 34, 40, 95, 152, 170, 180, 187, 199, 203, 196, 194, 193, 194, 194, 196, 198, 197, 195, 195, 192, 189, 189, 192, 196, 196, 198, 201, 200, 198, 197, 199, 199, 197, 196, 196, 195, 193, 194, 199, 198, 200, 201, 199, 195, 193, 193, 194, 195, 195, 194, 188, 184, 186, 192, 191, 191, 193, 193, 180, 150, 90, 37, 22, 19, 18, 17, 15, 17, 21, 23, 20, 19, 19, 21, 24, 26, 26, 29, 28, 26, 25, 24, 24, 24,
[truncated: 1,959,751 more chars]
