# Supplementary material for: Analysis of DES Plaintext Recovery Based on BP Neural Network
Source: Hindawi journal article supplement (doi:10.1155/2019/9580862), 2019-11-11
Supplement: f1 [file 9580862.f1.zip › 9580862.f1/plain/plain6]

[131, 131, 131, 133, 133, 133, 134, 135, 135, 136, 136, 136, 137, 133, 134, 134, 133, 132, 131, 131, 129, 129, 129, 131, 133, 133, 133, 131, 126, 125, 126, 127, 125, 124, 126, 128, 129, 129, 145, 144, 144, 144, 144, 141, 141, 142, 144, 147, 148, 148, 150, 153, 155, 156, 155, 154, 154, 156, 157, 159, 158, 159, 161, 163, 166, 167, 167, 167, 166, 165, 165, 165, 164, 163, 162, 162, 162, 163, 163, 163, 162, 165, 168, 168, 167, 163, 156, 151, 150, 145, 139, 136, 135, 137, 139, 139, 138, 132, 126, 118, 110, 104, 103, 104, 111, 117, 120, 120, 123, 124, 125, 126, 128, 133, 138, 140, 141, 141, 141, 142, 142, 142, 136, 132, 129, 129, 127, 125, 122, 117, 115, 114, 116, 116, 115, 114, 107, 99, 91, 86, 84, 81, 79, 79, 77, 77, 79, 77, 78, 78, 78, 78, 78, 78, 78, 78, 78, 78, 78, 78, 78, 78, 78, 78, 79, 79, 79, 79, 79, 78, 78, 78, 78, 78, 78, 78, 78, 78, 79, 81, 79, 78, 77, 77, 77, 77, 77, 77, 77, 77, 78, 78, 78, 78, 78, 77, 77, 77, 77, 77, 77, 77, 77, 77, 77, 77, 77, 77, 77, 77, 77, 77, 77, 77, 77, 77, 77, 77, 77, 77, 77, 77, 77, 77, 77, 77, 77, 77, 77, 78, 78, 79, 79, 81, 83, 83, 86, 89, 92, 101, 109, 114, 115, 113, 113, 111, 108, 106, 110, 114, 120, 124, 125, 126, 127, 128, 128, 129, 130, 131, 131, 132, 132, 134, 134, 135, 135, 135, 135, 132, 133, 134, 133, 132, 131, 131, 129, 129, 129, 131, 133, 132, 132, 129, 124, 122, 123, 123, 123, 122, 125, 126, 128, 128, 147, 145, 145, 146, 147, 146, 145, 146, 148, 150, 151, 152, 153, 155, 156, 157, 156, 155, 155, 156, 157, 159, 159, 160, 161, 163, 167, 167, 167, 167, 167, 167, 167, 167, 165, 164, 162, 162, 163, 163, 163, 164, 162, 164, 167, 168, 167, 164, 158, 153, 152, 147, 141, 137, 137, 139, 140, 140, 142, 137, 132, 125, 117, 110, 108, 108, 114, 120, 122, 121, 123, 124, 125, 126, 128, 134, 138, 140, 141, 141, 142, 143, 143, 142, 134, 131, 130, 130, 128, 125, 122, 117, 115, 115, 116, 115, 116, 115, 109, 101, 92, 86, 84, 81, 79, 79, 77, 77, 79, 78, 78, 78, 78, 78, 78, 78, 78, 78, 78, 78, 78, 78, 78, 78, 78, 78, 79, 79, 79, 79, 79, 78, 78, 78, 78, 78, 78, 78, 78, 78, 79, 81, 79, 78, 77, 77, 78, 78, 78, 78, 78, 78, 78, 78, 78, 78, 78, 77, 77, 77, 77, 77, 77, 77, 77, 77, 77, 77, 77, 77, 77, 77, 77, 77, 77, 77, 77, 77, 77, 77, 77, 77, 77, 77, 77, 77, 77, 77, 77, 77, 77, 78, 78, 78, 79, 81, 83, 83, 86, 89, 93, 101, 108, 110, 109, 108, 107, 105, 103, 102, 106, 111, 116, 120, 120, 122, 123, 123, 125, 128, 129, 129, 129, 131, 132, 133, 134, 134, 135, 135, 135, 132, 133, 134, 133, 131, 131, 131, 129, 129, 129, 130, 130, 130, 131, 128, 123, 123, 123, 122, 121, 121, 123, 124, 126, 127, 149, 147, 146, 148, 149, 148, 148, 149, 151, 153, 154, 155, 156, 157, 157, 158, 157, 157, 157, 158, 159, 160, 161, 162, 162, 163, 166, 167, 166, 167, 168, 168, 168, 167, 166, 163, 162, 162, 163, 163, 164, 164, 163, 165, 167, 168, 168, 164, 159, 155, 154, 148, 143, 140, 139, 142, 142, 141, 145, 141, 138, 132, 124, 116, 114, 113, 118, 123, 124, 123, 123, 123, 125, 126, 128, 133, 138, 140, 141, 141, 142, 143, 141, 140, 132, 128, 127, 129, 127, 124, 122, 117, 114, 114, 114, 113, 114, 114, 109, 102, 94, 88, 85, 82, 80, 79, 77, 77, 79, 78, 78, 78, 78, 78, 78, 78, 78, 78, 78, 78, 78, 78, 78, 78, 78, 78, 79, 79, 79, 79, 79, 78, 78, 78, 78, 78, 78, 78, 78, 78, 80, 81, 79, 78, 77, 77, 78, 78, 78, 78, 78, 78, 78, 78, 78, 78, 78, 77, 77, 77, 77, 77, 77, 77, 77, 77, 77, 77, 77, 77, 77, 77, 77, 77, 77, 77, 77, 77, 77, 77, 77, 77, 77, 77, 77, 77, 77, 77, 77, 77, 77, 78, 78, 78, 80, 82, 84, 84, 87, 90, 93, 101, 106, 106, 105, 104, 102, 101, 99, 100, 103, 108, 113, 117, 118, 119, 119, 119, 122, 126, 127, 127, 128, 129, 131, 131, 133, 133, 134, 134, 134, 132, 133, 133, 132, 131, 131, 131, 129, 129, 129, 129, 128, 127, 128, 126, 121, 123, 122, 120, 119, 119, 121, 123, 125, 126, 150, 149, 147, 149, 152, 150, 150, 150, 152, 155, 157, 157, 157, 158, 158, 159, 159, 158, 159, 160, 161, 161, 162, 163, 163, 163, 166, 166, 165, 166, 168, 168, 168, 167, 165, 163, 161, 163, 163, 164, 164, 165, 165, 166, 167, 168, 169, 165, 160, 157, 156, 150, 145, 144, 143, 144, 144, 142, 147, 145, 144, 139, 131, 122, 119, 118, 121, 125, 126, 124, 123, 123, 125, 126, 128, 134, 138, 140, 141, 141, 143, 142, 140, 137, 128, 126, 125, 127, 126, 123, 120, 115, 113, 113, 111, 110, 112, 113, 108, 102, 96, 90, 87, 83, 81, 79, 77, 77, 79, 77, 78, 78, 78, 78, 78, 78, 78, 78, 78, 78, 78, 78, 78, 78, 78, 78, 79, 79, 79, 79, 79, 78, 78, 78, 78, 78, 78, 78, 78, 78, 79, 81, 79, 78, 77, 77, 77, 79, 79, 79, 79, 79, 78, 78, 78, 78, 78, 77, 77, 77, 77, 77, 77, 77, 77, 77, 77, 77, 77, 77, 77, 77, 77, 77, 77, 77, 77, 77, 77, 77, 77, 77, 77, 77, 77, 77, 77, 77, 77, 77, 77, 78, 78, 79, 80, 82, 84, 84, 87, 90, 93, 98, 102, 102, 101, 100, 98, 96, 95, 96, 101, 105, 111, 114, 115, 116, 116, 116, 119, 124, 125, 125, 127, 128, 130, 131, 131, 133, 133, 133, 134, 131, 132, 133, 131, 131, 131, 131, 129, 129, 129, 128, 127, 125, 126, 121, 117, 120, 118, 116, 117, 117, 119, 122, 124, 126, 151, 149, 148, 150, 153, 151, 150, 152, 153, 156, 158, 158, 158, 159, 159, 159, 161, 160, 160, 161, 162, 162, 162, 164, 164, 163, 166, 165, 164, 165, 168, 168, 168, 167, 165, 162, 161, 163, 163, 164, 165, 165, 166, 166, 168, 169, 169, 166, 160, 158, 158, 151, 146, 146, 146, 148, 146, 144, 147, 148, 147, 143, 137, 125, 122, 120, 124, 128, 127, 124, 123, 122, 124, 126, 128, 133, 138, 140, 141, 142, 143, 142, 139, 134, 126, 123, 123, 125, 124, 121, 118, 114, 112, 111, 109, 108, 109, 112, 108, 101, 97, 91, 88, 84, 82, 79, 77, 77, 79, 78, 78, 78, 78, 78, 78, 78, 78, 78, 78, 78, 78, 78, 78, 78, 78, 78, 79, 79, 79, 79, 79, 78, 78, 78, 78, 78, 78, 78, 78, 78, 80, 81, 79, 78, 77, 77, 78, 79, 79, 79, 79, 79, 78, 78, 78, 78, 78, 77, 77, 77, 77, 77, 77, 77, 77, 77, 77, 77, 77, 77, 77, 77, 77, 77, 77, 77, 77, 77, 77, 77, 77, 77, 77, 77, 77, 77, 77, 77, 77, 77, 77, 78, 78, 78, 80, 82, 84, 84, 88, 90, 93, 97, 100, 99, 99, 98, 95, 93, 93, 95, 100, 104, 110, 113, 113, 114, 113, 114, 118, 123, 124, 124, 125, 127, 129, 130, 131, 132, 133, 133, 133, 131, 132, 133, 131, 131, 131, 131, 129, 129, 129, 129, 127, 124, 123, 118, 112, 113, 113, 113, 114, 117, 119, 121, 123, 125, 155, 154, 153, 154, 155, 154, 154, 155, 156, 159, 160, 161, 161, 162, 162, 162, 163, 163, 163, 163, 163, 163, 164, 164, 164, 164, 165, 164, 163, 165, 167, 168, 167, 168, 167, 165, 163, 164, 164, 165, 165, 165, 166, 167, 168, 168, 168, 166, 162, 160, 159, 154, 151, 149, 150, 152, 152, 149, 149, 150, 150, 146, 141, 134, 129, 125, 127, 129, 129, 128, 128, 127, 129, 129, 130, 136, 139, 140, 140, 143, 143, 142, 137, 134, 125, 117, 116, 122, 122, 118, 114, 109, 106, 105, 104, 103, 106, 107, 104, 101, 96, 91, 87, 82, 81, 79, 79, 79, 79, 78, 78, 78, 78, 78, 79, 80, 80, 80, 80, 80, 80, 79, 79, 79, 79, 79, 80, 80, 80, 80, 80, 79, 79, 79, 79, 79, 79, 79, 78, 79, 80, 83, 81, 79, 79, 79, 79, 79, 79, 79, 79, 79, 78, 78, 78, 78, 78, 78, 78, 78, 78, 78, 78, 78, 78, 78, 78, 78, 78, 78, 78, 78, 78, 78, 78, 78, 78, 78, 78, 78, 78, 78, 78, 78, 78, 78, 78, 78, 78, 77, 77, 78, 78, 78, 82, 83, 86, 88, 90, 92, 94, 95, 95, 94, 93, 93, 94, 94, 93, 92, 96, 101, 107, 110, 111, 111, 113, 114, 117, 121, 123, 124, 124, 123, 125, 128, 127, 128, 130, 131, 131, 130, 130, 130, 129, 129, 128, 128, 126, 124, 122, 122, 122, 121, 121, 116, 110, 110, 107, 108, 111, 116, 118, 120, 123, 125, 156, 156, 156, 156, 156, 157, 157, 157, 159, 161, 162, 162, 163, 164, 164, 165, 164, 164, 164, 164, 164, 164, 164, 164, 164, 164, 165, 164, 164, 165, 167, 167, 168, 168, 168, 166, 165, 165, 165, 165, 165, 165, 167, 167, 168, 168, 167, 167, 163, 161, 159, 156, 153, 151, 152, 154, 155, 152, 151, 152, 151, 148, 145, 139, 132, 129, 130, 130, 131, 130, 131, 130, 131, 131, 133, 137, 140, 140, 139, 144, 143, 141, 137, 133, 125, 115, 112, 120, 121, 116, 112, 106, 103, 101, 101, 101, 104, 104, 102, 100, 96, 91, 86, 81, 80, 79, 80, 80, 79, 78, 79, 78, 78, 78, 80, 81, 81, 81, 81, 81, 81, 79, 79, 79, 79, 79, 81, 81, 81, 81, 81, 80, 80, 80, 80, 80, 80, 79, 78, 79, 82, 84, 82, 79, 80, 80, 79, 79, 79, 79, 79, 79, 78, 78, 78, 78, 78, 78, 78, 78, 78, 78, 78, 78, 78, 78, 78, 78, 78, 78, 78, 78, 78, 78, 78, 78, 78, 78, 78, 78, 78, 78, 78, 78, 78, 78, 78, 78, 78, 77, 77, 78, 78, 79, 82, 84, 87, 89, 92, 93, 94, 94, 92, 91, 90, 91, 92, 93, 92, 90, 93, 98, 105, 109, 109, 109, 111, 114, 117, 119, 121, 124, 124, 122, 124, 126, 125, 126, 127, 128, 130, 129, 129, 129, 128, 128, 127, 126, 123, 121, 119, 119, 119, 118, 118, 114, 109, 109, 106, 107, 111, 116, 119, 121, 124, 125, 157, 157, 157, 157, 157, 159, 158, 159, 160, 162, 163, 164, 164, 165, 165, 165, 165, 165, 165, 165, 165, 165, 165, 165, 165, 165, 166, 166, 165, 166, 168, 168, 168, 169, 169, 167, 166, 166, 166, 166, 166, 166, 167, 168, 169, 169, 167, 168, 164, 161, 160, 157, 154, 153, 153, 155, 156, 154, 152, 153, 153, 150, 147, 141, 136, 133, 134, 133, 132, 131, 132, 131, 132, 132, 133, 137, 140, 140, 140, 143, 143, 141, 136, 133, 126, 114, 111, 118, 119, 114, 110, 104, 101, 99, 99, 99, 102, 103, 101, 100, 96, 91, 86, 81, 81, 80, 80, 80, 79, 78, 79, 78, 78, 78, 80, 81, 81, 81, 81, 81, 81, 79, 79, 79, 79, 79, 81, 81, 81, 81, 81, 80, 80, 80, 80, 80, 80, 79, 78, 79, 82, 84, 82, 79, 79, 80, 79, 79, 79, 79, 79, 79, 78, 78, 78, 78, 78, 78, 78, 78, 78, 78, 78, 78, 78, 78, 78, 78, 78, 78, 78, 78, 78, 78, 78, 78, 78, 78, 78, 78, 78, 78, 78, 78, 78, 78, 78, 78, 78, 77, 77, 78, 78, 78, 82, 84, 87, 89, 92, 92, 92, 91, 90, 89, 89, 89, 91, 91, 90, 89, 92, 97, 104, 108, 109, 109, 109, 112, 115, 118, 119, 122, 123, 122, 123, 126, 124, 125, 126, 127, 128, 128, 128, 128, 127, 127, 126, 125, 122, 119, 118, 118, 118, 116, 116, 113, 108, 107, 106, 108, 113, 118, 121, 123, 125, 127, 159, 159, 159, 159, 159, 160, 160, 160, 162, 164, 165, 165, 165, 166, 166, 167, 166, 166, 166, 166, 166, 167, 167, 167, 167, 167, 168, 167, 167, 167, 169, 169, 169, 169, 169, 168, 167, 168, 168, 168, 168, 168, 168, 169, 170, 170, 169, 169, 165, 162, 161, 158, 155, 154, 154, 157, 156, 155, 154, 155, 154, 151, 150, 144, 139, 137, 137, 136, 134, 133, 133, 133, 133, 132, 134, 137, 140, 141, 141, 143, 143, 141, 137, 133, 126, 113, 109, 115, 116, 112, 107, 102, 98, 97, 96, 97, 100, 101, 100, 99, 95, 91, 86, 81, 81, 80, 80, 80, 80, 78, 79, 78, 78, 78, 80, 81, 81, 81, 81, 81, 81, 80, 80, 80, 80, 80, 81, 81, 81, 81, 81, 81, 81, 81, 81, 81, 80, 80, 79, 80, 82, 84, 82, 79, 80, 80, 79, 79, 79, 79, 79, 79, 78, 78, 78, 78, 78, 78, 78, 78, 78, 78, 78, 78, 78, 78, 78, 78, 78, 78, 78, 78, 78, 78, 78, 78, 78, 78, 78, 78, 78, 78, 78, 78, 78, 78, 78, 78, 78, 77, 77, 78, 78, 78, 82, 84, 87, 89, 92, 92, 91, 90, 89, 88, 87, 88, 89, 89, 89, 88, 92, 97, 103, 107, 108, 108, 108, 109, 111, 115, 118, 120, 122, 120, 122, 124, 124, 124, 125, 126, 126, 127, 127, 127, 126, 126, 125, 123, 119, 117, 116, 116, 116, 114, 115, 112, 108, 107, 108, 111, 116, 121, 123, 125, 127, 128, 160, 160, 160, 160, 160, 162, 162, 162, 163, 166, 166, 166, 167, 167, 168, 168, 167, 167, 167, 167, 167, 168, 168, 168, 168, 168, 169, 169, 169, 169, 169, 169, 169, 169, 169, 169, 169, 169, 169, 169, 169, 169, 170, 170, 171, 171, 170, 170, 166, 164, 162, 159, 157, 156, 155, 157, 157, 155, 156, 155, 155, 153, 152, 145, 143, 141, 141, 138, 136, 135, 135, 134, 134, 134, 134, 137, 140, 141, 142, 143, 143, 141, 138, 135, 127, 113, 107, 113, 114, 110, 106, 100, 95, 94, 94, 95, 98, 101, 100, 99, 95, 90, 86, 82, 82, 80, 81, 81, 80, 79, 79, 78, 78, 78, 80, 81, 81, 81, 81, 81, 81, 80, 80, 80, 80, 80, 81, 81, 81, 81, 81, 81, 81, 81, 81, 81, 81, 80, 79, 80, 83, 84, 82, 79, 79, 80, 79, 79, 79, 79, 79, 79, 78, 78, 78, 78, 78, 78, 78, 78, 78, 78, 78, 78, 78, 78, 78, 78, 78, 78, 78, 78, 78, 78, 78, 78, 78, 78, 78, 78, 78, 78, 78, 78, 78, 78, 78, 78, 78, 77, 77, 78, 78, 78, 82, 84, 87, 89, 92, 91, 90, 89, 88, 87, 87, 88, 87, 87, 87, 88, 91, 97, 103, 106, 108, 106, 106, 106, 108, 113, 116, 118, 121, 120, 122, 123, 124, 124, 125, 124, 124, 125, 125, 125, 124, 124, 123, 121, 116, 114, 114, 115, 114, 113, 113, 111, 108, 107, 110, 114, 119, 122, 125, 126, 128, 129, 162, 162, 162, 162, 162, 162, 163, 163, 164, 166, 167, 168, 169, 169, 170, 170, 169, 169, 169, 169, 169, 170, 170, 170, 170, 170, 171, 171, 171, 171, 170, 170, 170, 169, 169, 170, 171, 171, 171, 171, 171, 171, 171, 172, 173, 172, 171, 171, 167, 165, 164, 160, 158, 158, 156, 158, 158, 155, 157, 155, 155, 154, 154, 147, 145, 144, 144, 139, 138, 137, 136, 135, 135, 135, 135, 137, 139, 141, 143, 143, 144, 143, 140, 137, 129, 114, 107, 111, 113, 109, 105, 99, 93, 91, 92, 94, 98, 101, 101, 99, 94, 90, 86, 82, 82, 81, 81, 81, 80, 79, 79, 78, 78, 78, 80, 81, 81, 81, 81, 81, 81, 81, 81, 81, 81, 81, 81, 81, 81, 81, 81, 82, 82, 82, 82, 82, 81, 81, 80, 80, 83, 85, 82, 79, 80, 80, 79, 79, 79, 79, 79, 79, 78, 78, 78, 78, 78, 78, 78, 78, 78, 78, 78, 78, 78, 78, 78, 78, 78, 78, 78, 78, 78, 78, 78, 78, 78, 78, 78, 78, 78, 78, 78, 78, 78, 78, 78, 78, 78, 77, 77, 78, 78, 78, 82, 83, 87, 89, 92, 91, 91, 89, 89, 87, 87, 87, 86, 85, 86, 87, 90, 95, 102, 105, 107, 105, 104, 103, 105, 109, 113, 117, 120, 120, 120, 122, 123, 123, 123, 122, 123, 124, 124, 124, 123, 123, 121, 119, 114, 112, 112, 114, 114, 112, 113, 111, 109, 109, 113, 119, 122, 124, 126, 126, 128, 129, 163, 163, 163, 163, 163, 163, 163, 163, 164, 166, 168, 170, 170, 171, 171, 171, 170, 170, 170, 170, 170, 172, 172, 172, 172, 172, 172, 173, 173, 173, 171, 170, 170, 169, 170, 171, 173, 173, 173, 173, 173, 173, 172, 172, 173, 173, 172, 172, 169, 166, 164, 162, 159, 159, 157, 159, 158, 155, 156, 155, 154, 154, 155, 147, 147, 146, 146, 140, 140, 139, 138, 136, 136, 135, 136, 137, 139, 142, 144, 145, 145, 144, 141, 139, 131, 114, 106, 111, 112, 108, 104, 98, 93, 91, 91, 93, 97, 101, 102, 101, 94, 90, 86, 82, 82, 81, 82, 82, 81, 79, 79, 78, 78, 78, 80, 81, 81, 81, 81, 81, 81, 81, 81, 81, 81, 81, 81, 81, 81, 81, 81, 82, 82, 82, 82, 82, 81, 81, 80, 81, 83, 85, 82, 79, 79, 80, 79, 79, 79, 79, 79, 79, 78, 78, 78, 78, 78, 78, 78, 78, 78, 78, 78, 78, 78, 78, 78, 78, 78, 78, 78, 78, 78, 78, 78, 78, 78, 78, 78, 78, 78, 78, 78, 78, 78, 78, 78, 78, 78, 77, 77, 78, 78, 79, 82, 83, 86, 89, 92, 91, 90, 89, 88, 87, 87, 86, 84, 83, 84, 86, 90, 95, 101, 105, 106, 105, 103, 101, 103, 107, 110, 115, 120, 120, 120, 122, 122, 123, 122, 122, 122, 123, 123, 123, 122, 122, 120, 117, 112, 110, 111, 114, 114, 112, 113, 112, 110, 112, 117, 122, 125, 126, 126, 127, 128, 128, 164, 164, 164, 164, 164, 163, 163, 163, 164, 166, 168, 170, 171, 171, 172, 172, 170, 170, 170, 170, 170, 172, 172, 172, 172, 172, 173, 174, 175, 173, 171, 170, 171, 169, 170, 172, 174, 173, 173, 173, 173, 173, 172, 173, 174, 173, 172, 173, 169, 166, 165, 162, 160, 159, 158, 159, 158, 156, 156, 155, 153, 154, 155, 147, 147, 148, 146, 140, 140, 139, 139, 137, 137, 136, 136, 136, 139, 142, 144, 145, 146, 145, 142, 140, 132, 116, 106, 111, 112, 108, 104, 97, 93, 90, 90, 93, 97, 102, 102, 101, 94, 89, 86, 83, 83, 81, 82, 82, 81, 80, 79, 78, 78, 78, 80, 81, 81, 81, 81, 81, 81, 81, 81, 81, 81, 81, 81, 81, 81, 81, 81, 82, 82, 82, 82, 82, 82, 81, 80, 81, 83, 86, 82, 79, 80, 80, 79, 79, 79, 79, 79, 79, 78, 78, 78, 78, 78, 78, 78, 78, 78, 78, 78, 78, 78, 78, 78, 78, 78, 78, 78, 78, 78, 78, 78, 78, 78, 78, 78, 78, 78, 78, 78, 78, 78, 78, 78, 78, 78, 77, 77, 78, 78, 78, 82, 83, 87, 89, 92, 91, 91, 90, 89, 87, 87, 85, 83, 82, 83, 85, 89, 95, 101, 105, 105, 105, 102, 100, 102, 107, 110, 114, 120, 120, 119, 121, 122, 123, 122, 121, 121, 123, 123, 123, 122, 122, 120, 116, 111, 109, 110, 113, 115, 112, 113, 112, 111, 115, 120, 125, 127, 126, 125, 127, 128, 128, 164, 164, 164, 164, 164, 165, 164, 165, 166, 168, 170, 171, 172, 173, 174, 174, 173, 173, 173, 172, 171, 174, 174, 176, 178, 179, 178, 178, 178, 177, 175, 174, 174, 173, 173, 175, 177, 178, 178, 178, 177, 176, 176, 176, 176, 176, 174, 172, 171, 171, 170, 169, 167, 164, 160, 158, 158, 159, 159, 158, 158, 158, 158, 156, 155, 154, 151, 148, 147, 145, 146, 146, 145, 143, 142, 143, 144, 145, 147, 148, 147, 145, 143, 141, 135, 128, 123, 119, 114, 108, 100, 92, 91, 92, 91, 92, 94, 94, 96, 100, 92, 91, 89, 88, 87, 84, 83, 84, 85, 84, 83, 81, 81, 81, 81, 81, 81, 81, 81, 81, 81, 81, 81, 81, 81, 81, 81, 81, 81, 81, 81, 82, 82, 82, 82, 82, 82, 82, 81, 83, 84, 86, 81, 80, 80, 81, 81, 80, 81, 81, 80, 79, 79, 79, 79, 79, 79, 79, 79, 79, 79, 79, 79, 79, 79, 79, 79, 79, 79, 79, 79, 79, 79, 79, 79, 79, 79, 79, 79, 79, 79, 79, 79, 79, 79, 79, 79, 79, 79, 78, 78, 79, 79, 79, 82, 83, 86, 87, 88, 90, 89, 89, 88, 87, 87, 85, 85, 85, 84, 84, 92, 98, 104, 105, 103, 101, 100, 99, 101, 104, 106, 109, 111, 114, 115, 116, 118, 119, 119, 120, 119, 116, 117, 118, 117, 117, 116, 115, 114, 111, 109, 109, 111, 112, 114, 115, 114, 118, 121, 121, 123, 125, 124, 124, 124, 124, 164, 164, 164, 164, 164, 165, 165, 165, 166, 168, 170, 171, 172, 173, 174, 175, 174, 174, 174, 173, 171, 174, 175, 177, 179, 180, 179, 180, 179, 178, 176, 175, 175, 174, 175, 176, 177, 179, 179, 179, 178, 176, 176, 177, 177, 176, 174, 172, 172, 173, 172, 171, 169, 166, 161, 159, 159, 160, 159, 159, 159, 159, 159, 157, 156, 154, 151, 148, 149, 147, 148, 149, 147, 144, 143, 143, 145, 145, 147, 148, 147, 146, 143, 142, 136, 132, 128, 124, 118, 111, 102, 93, 92, 92, 91, 92, 93, 93, 96, 98, 94, 92, 90, 89, 87, 85, 83, 84, 86, 84, 84, 82, 82, 81, 81, 81, 81, 81, 81, 81, 81, 81, 81, 81, 81, 81, 81, 81, 81, 81, 81, 82, 82, 82, 82, 82, 82, 82, 81, 83, 84, 86, 81, 81, 80, 81, 82, 80, 81, 81, 80, 79, 79, 79, 79, 79, 79, 79, 79, 79, 79, 79, 79, 79, 79, 79, 79, 79, 79, 79, 79, 79, 79, 79, 79, 79, 79, 79, 79, 79, 79, 79, 79, 79, 79, 79, 79, 79, 79, 78, 78, 79, 79, 79, 82, 83, 85, 86, 88, 88, 88, 88, 87, 86, 86, 85, 85, 86, 85, 84, 93, 99, 104, 105, 102, 100, 100, 99, 101, 104, 106, 108, 110, 112, 114, 115, 117, 118, 118, 119, 119, 115, 116, 117, 116, 116, 114, 114, 113, 111, 109, 108, 110, 112, 115, 115, 115, 118, 120, 120, 120, 123, 122, 122, 122, 122, 164, 164, 164, 164, 164, 165, 165, 165, 166, 169, 170, 171, 172, 173, 175, 175, 174, 174, 174, 173, 172, 174, 176, 177, 179, 180, 180, 180, 180, 178, 176, 175, 175, 174, 175, 176, 177, 179, 179, 179, 178, 177, 177, 177, 177, 176, 175, 174, 174, 175, 173, 172, 170, 168, 163, 161, 160, 161, 159, 159, 159, 159, 159, 157, 156, 154, 151, 149, 150, 149, 150, 150, 148, 144, 143, 143, 145, 145, 147, 148, 147, 146, 143, 143, 139, 134, 132, 129, 124, 116, 106, 97, 94, 92, 91, 92, 93, 93, 96, 99, 97, 94, 91, 89, 87, 85, 83, 84, 86, 84, 84, 82, 82, 81, 81, 81, 81, 81, 81, 81, 81, 81, 81, 81, 81, 81, 81, 81, 81, 81, 81, 82, 82, 82, 82, 82, 82, 82, 81, 83, 84, 86, 81, 81, 80, 81, 81, 80, 81, 81, 80, 78, 79, 79, 79, 79, 79, 79, 79, 79, 79, 79, 79, 79, 79, 79, 79, 79, 79, 79, 79, 79, 79, 79, 79, 79, 79, 79, 79, 79, 79, 79, 79, 79, 79, 79, 79, 79, 79, 78, 78, 79, 79, 80, 83, 83, 85, 86, 87, 87, 86, 86, 86, 85, 85, 85, 85, 86, 86, 86, 93, 99, 103, 104, 102, 101, 99, 99, 100, 103, 105, 107, 109, 112, 113, 114, 115, 116, 116, 118, 118, 115, 116, 117, 116, 115, 114, 114, 113, 111, 109, 108, 110, 113, 115, 116, 116, 118, 120, 119, 117, 120, 121, 121, 121, 121, 164, 164, 164, 164, 164, 166, 165, 166, 167, 169, 170, 171, 172, 173, 174, 175, 174, 175, 174, 174, 172, 175, 176, 177, 179, 180, 180, 180, 180, 178, 177, 176, 175, 175, 175, 176, 178, 179, 180, 179, 179, 177, 177, 178, 178, 177, 176, 176, 176, 177, 175, 174, 172, 169, 166, 163, 161, 161, 159, 159, 159, 159, 159, 158, 156, 154, 152, 151, 153, 151, 151, 151, 149, 145, 143, 144, 146, 146, 148, 148, 148, 147, 144, 143, 141, 138, 136, 135, 130, 121, 111, 101, 97, 93, 91, 93, 93, 93, 95, 98, 99, 97, 93, 89, 87, 85, 83, 84, 86, 84, 84, 82, 82, 82, 81, 81, 82, 82, 82, 82, 82, 82, 82, 82, 82, 82, 81, 81, 81, 81, 81, 82, 82, 82, 82, 82, 82, 82, 81, 83, 84, 86, 81, 81, 80, 81, 82, 80, 81, 81, 80, 79, 79, 79, 79, 79, 79, 79, 79, 79, 79, 79, 79, 79, 79, 79, 79, 79, 79, 79, 79, 79, 79, 79, 79, 79, 79, 79, 79, 79, 79, 79, 79, 79, 79, 79, 79, 79, 79, 78, 78, 79, 79, 79, 83, 83, 84, 85, 86, 86, 85, 84, 84, 84, 84, 85, 85, 85, 86, 87, 94, 98, 102, 103, 102, 101, 101, 99, 100, 103, 104, 106, 109, 111, 113, 114, 113, 114, 114, 116, 118, 116, 117, 117, 116, 115, 114, 114, 113, 112, 110, 109, 110, 113, 115, 116, 117, 118, 120, 117, 115, 116, 119, 119, 119, 120, 164, 164, 164, 164, 164, 166, 166, 166, 167, 169, 170, 171, 172, 173, 174, 175, 174, 175, 175, 174, 172, 175, 176, 178, 180, 181, 180, 181, 180, 179, 177, 176, 176, 175, 176, 176, 178, 180, 180, 180, 179, 177, 177, 178, 178, 177, 175, 177, 177, 178, 176, 176, 173, 170, 167, 164, 161, 161, 159, 159, 159, 159, 159, 158, 155, 154, 152, 152, 154, 153, 152, 152, 149, 145, 144, 144, 146, 146, 148, 148, 148, 147, 145, 144, 143, 140, 140, 139, 135, 125, 115, 105, 99, 94, 91, 93, 94, 93, 95, 98, 101, 98, 94, 90, 88, 85, 83, 84, 86, 84, 84, 82, 82, 81, 81, 81, 82, 82, 82, 82, 82, 82, 82, 82, 82, 82, 81, 81, 81, 81, 81, 82, 82, 82, 82, 82, 82, 82, 81, 83, 84, 86, 81, 81, 80, 81, 82, 80, 81, 81, 80, 79, 79, 79, 79, 79, 79, 79, 79, 79, 79, 79, 79, 79, 79, 79, 79, 79, 79, 79, 79, 79, 79, 79, 79, 79, 79, 79, 79, 79, 79, 79, 79, 79, 79, 79, 79, 79, 79, 78, 78, 79, 79, 80, 82, 83, 84, 85, 85, 85, 83, 83, 83, 84, 84, 86, 85, 85, 87, 89, 95, 98, 101, 102, 101, 102, 101, 99, 100, 102, 104, 106, 108, 110, 112, 113, 112, 112, 113, 116, 118, 117, 117, 117, 116, 115, 113, 113, 113, 111, 110, 109, 110, 113, 116, 117, 118, 118, 120, 116, 113, 114, 117, 118, 118, 119, 164, 164, 164, 164, 164, 166, 166, 166, 167, 170, 170, 171, 173, 173, 175, 175, 175, 176, 175, 174, 173, 175, 177, 178, 180, 181, 181, 181, 181, 179, 177, 176, 176, 176, 176, 177, 178, 180, 181, 180, 179, 178, 178, 179, 179, 177, 176, 177, 178, 178, 177, 176, 174, 171, 168, 165, 161, 160, 159, 159, 159, 159, 159, 158, 155, 153, 153, 153, 155, 153, 152, 153, 149, 145, 144, 144, 146, 147, 149, 148, 148, 148, 145, 145, 145, 142, 141, 140, 137, 126, 118, 107, 101, 94, 92, 94, 94, 93, 94, 97, 100, 98, 94, 91, 88, 85, 83, 84, 86, 84, 84, 82, 82, 81, 81, 82, 83, 83, 83, 83, 83, 83, 83, 83, 83, 83, 81, 81, 81, 81, 81, 82, 82, 82, 82, 82, 82, 82, 81, 83, 84, 86, 81, 81, 80, 81, 81, 80, 81, 81, 80, 79, 79, 79, 79, 79, 79, 79, 79, 79, 79, 79, 79, 79, 79, 79, 79, 79, 79, 79, 79, 79, 79, 79, 79, 79, 79, 79, 79, 79, 79, 79, 79, 79, 79, 79, 79, 79, 79, 78, 78, 79, 79, 79, 82, 83, 84, 84, 85, 84, 83, 83, 84, 84, 84, 86, 85, 85, 87, 90, 96, 98, 101, 101, 101, 101, 100, 99, 99, 102, 103, 105, 107, 109, 111, 112, 112, 112, 112, 116, 119, 117, 117, 117, 115, 114, 112, 113, 113, 113, 111, 110, 110, 113, 116, 118, 119, 119, 120, 116, 113, 114, 116, 117, 118, 119, 40, 13, 56, 19, 3, 4, 49, 8, 3, 16, 128, 2, 24, 128, 2, 34, 128, 128, 12, 62, 63, 64, 62, 62, 62, 59, 56, 61, 69, 74, 74, 73, 71, 72, 73, 71, 72, 73, 73, 73, 74, 77, 76, 77, 80, 80, 81, 82, 82, 81, 84, 82, 83, 84, 86, 83, 74, 46, 53, 56, 58, 57, 71, 69, 79, 83, 87, 95, 94, 98, 100, 105, 105, 108, 107, 113, 118, 164, 183, 188, 201, 220, 230, 241, 248, 248, 252, 254, 254, 254, 254, 254, 254, 254, 254, 254, 254, 254, 254, 254, 254, 254, 254, 254, 254, 254, 254, 254, 254, 254, 254, 254, 254, 254, 254, 254, 254, 254, 254, 254, 254, 254, 254, 254, 254, 254, 254, 254, 254, 254, 254, 254, 254, 254, 254, 254, 254, 254, 254, 254, 254, 254, 254, 254, 254, 254, 254, 255, 255, 255, 255, 255, 255, 247, 246, 247, 250, 252, 254, 254, 255, 255, 255, 255, 255, 255, 254, 253, 244, 235, 216, 187, 165, 145, 131, 120, 114, 105, 84, 81, 83, 87, 80, 64, 60, 70, 83, 95, 101, 96, 93, 97, 94, 96, 100, 100, 100, 101, 97, 101, 98, 96, 91, 93, 91, 84, 78, 17, 24, 24, 24, 22, 19, 20, 22, 24, 24, 23, 23, 22, 21, 20, 19, 18, 22, 22, 22, 21, 21, 21, 22, 21, 20, 20, 20, 18, 18, 18, 19, 17, 19, 19, 19, 22, 22, 22, 25, 36, 49, 56, 59, 64, 65, 63, 63, 59, 58, 51, 37, 19, 9, 3, 13, 10, 9, 6, 6, 5, 2, 3, 5, 3, 1, 5, 13, 10, 18, 62, 62, 63, 61, 61, 61, 60, 59, 64, 71, 74, 73, 73, 73, 72, 71, 70, 71, 72, 75, 76, 77, 77, 76, 78, 79, 80, 81, 81, 82, 82, 84, 85, 86, 87, 87, 89, 80, 45, 53, 58, 58, 62, 69, 65, 79, 80, 89, 96, 98, 102, 109, 106, 105, 100, 108, 113, 140, 165, 172, 194, 206, 224, 229, 246, 248, 249, 252, 254, 254, 254, 254, 254, 254, 254, 254, 254, 254, 254, 254, 254, 254, 254, 254, 254, 254, 254, 254, 254, 254, 254, 254, 254, 254, 254, 254, 254, 254, 254, 254, 254, 254, 254, 254, 254, 254, 254, 254, 254, 254, 254, 254, 254, 254, 254, 254, 254, 254, 254, 254, 254, 254, 254, 254, 254, 254, 254, 254, 251, 251, 252, 253, 253, 253, 253, 253, 254, 254, 255, 255, 255, 255, 253, 253, 249, 242, 237, 236, 224, 208, 184, 156, 134, 120, 111, 109, 106, 95, 81, 84, 86, 83, 71, 64, 70, 80, 91, 93, 93, 98, 106, 103, 106, 98, 97, 95, 95, 95, 95, 98, 97, 96, 96, 97, 93, 92, 75, 28, 25, 27, 25, 24, 20, 21, 20, 22, 24, 23, 23, 23, 22, 21, 21, 20, 19, 21, 21, 21, 21, 21, 21, 21, 21, 20, 20, 20, 18, 18, 18, 19, 17, 19, 19, 19, 21, 21, 21, 17, 14, 14, 17, 16, 19, 29, 40, 48, 55, 58, 58, 58, 62, 58, 44, 35, 20, 7, 3, 3, 3, 3, 3, 3, 1, 1, 15, 26, 61, 62, 62, 63, 63, 63, 62, 62, 68, 75, 73, 73, 72, 73, 72, 71, 70, 71, 72, 75, 76, 76, 77, 78, 79, 79, 81, 82, 82, 83, 85, 85, 87, 88, 89, 88, 90, 86, 52, 51, 55, 61, 63, 64, 67, 76, 87, 90, 98, 103, 104, 103, 111, 108, 113, 112, 120, 141, 159, 180, 185, 210, 221, 227, 248, 248, 250, 252, 254, 254, 254, 254, 254, 254, 254, 254, 254, 254, 254, 254, 254, 254, 254, 254, 254, 254, 254, 254, 254, 254, 254, 254, 254, 254, 254, 254, 254, 254, 254, 254, 254, 254, 254, 254, 254, 254, 254, 254, 254, 254, 254, 254, 254, 254, 254, 254, 254, 254, 254, 254, 254, 254, 254, 254, 254, 254, 254, 254, 247, 247, 247, 247, 248, 249, 253, 255, 255, 255, 255, 255, 255, 252, 248, 242, 227, 215, 198, 179, 155, 141, 133, 129, 125, 113, 103, 92, 88, 85, 87, 79, 72, 66, 73, 84, 99, 98, 91, 92, 101, 111, 118, 109, 105, 106, 104, 105, 106, 109, 101, 99, 94, 95, 95, 95, 91, 82, 28, 22, 26, 28, 26, 24, 21, 23, 21, 22, 24, 24, 23, 22, 21, 21, 21, 20, 19, 20, 20, 20, 20, 20, 20, 21, 20, 19, 20, 20, 18, 18, 18, 19, 17, 18, 18, 18, 18, 18, 18, 14, 19, 20, 15, 16, 16, 16, 13, 9, 13, 10, 16, 16, 20, 26, 28, 32, 46, 48, 45, 34, 19, 6, 6, 7, 6, 5, 9, 11, 57, 60, 61, 62, 62, 62, 62, 64, 64, 72, 77, 73, 72, 71, 71, 72, 73, 72, 73, 74, 76, 77, 78, 77, 79, 80, 80, 84, 84, 85, 84, 87, 86, 87, 87, 88, 91, 89, 91, 54, 53, 56, 58, 65, 67, 59, 74, 82, 90, 101, 106, 102, 107, 116, 109, 108, 108, 122, 136, 159, 187, 185, 200, 223, 228, 244, 249, 250, 252, 254, 254, 254, 254, 254, 254, 254, 254, 254, 254, 254, 254, 254, 254, 254, 254, 254, 254, 254, 254, 254, 254, 254, 254, 254, 254, 254, 254, 254, 254, 254, 254, 254, 254, 254, 254, 254, 254, 254, 254, 254, 254, 254, 254, 254, 254, 254, 254, 254, 254, 254, 254, 254, 254, 254, 254, 254, 254, 254, 254, 250, 250, 249, 249, 249, 247, 253, 255, 255, 255, 254, 252, 252, 242, 233, 215, 196, 163, 134, 124, 118, 115, 115, 120, 121, 106, 85, 84, 89, 87, 69, 58, 71, 81, 93, 97, 94, 92, 99, 103, 107, 110, 107, 105, 98, 102, 103, 104, 101, 101, 100, 95, 93, 92, 92, 92, 82, 41, 25, 23, 23, 25, 24, 24, 22, 21, 22, 22, 24, 24, 22, 22, 21, 20, 18, 17, 17, 18, 18, 18, 19, 19, 19, 20, 19, 19, 19, 20, 18, 18, 18, 19, 17, 17, 17, 17, 17, 17, 17, 20, 16, 18, 23, 20, 15, 12, 11, 13, 13, 15, 15, 15, 14, 11, 11, 17, 17, 16, 16, 16, 15, 15, 12, 11, 13, 10, 20, 28, 57, 61, 61, 60, 62, 63, 64, 64, 69, 79, 76, 72, 71, 73, 76, 78, 75, 76, 75, 76, 76, 78, 79, 80, 82, 82, 83, 85, 86, 87, 88, 88, 88, 89, 90, 91, 92, 89, 90, 72, 48, 54, 51, 64, 67, 76, 75, 85, 97, 101, 99, 102, 116, 118, 119, 121, 118, 120, 135, 165, 170, 188, 205, 227, 230, 244, 248, 249, 252, 254, 254, 254, 254, 254, 254, 254, 254, 254, 254, 254, 254, 254, 254, 254, 254, 254, 254, 254, 254, 254, 254, 254, 254, 254, 254, 254, 254, 254, 254, 254, 254, 254, 254, 254, 254, 254, 254, 254, 254, 254, 254, 254, 254, 254, 254, 254, 254, 254, 254, 254, 254, 254, 254, 254, 254, 254, 254, 254, 254, 255, 255, 253, 255, 255, 252, 251, 249, 247, 246, 236, 229, 219, 197, 171, 150, 140, 132, 129, 125, 116, 116, 116, 97, 87, 91, 90, 89, 79, 59, 64, 71, 91, 100, 95, 92, 96, 103, 113, 113, 114, 112, 109, 106, 104, 100, 98, 98, 96, 95, 98, 105, 97, 94, 97, 89, 36, 25, 25, 25, 25, 25, 25, 25, 24, 23, 24, 23, 24, 24, 22, 21, 19, 19, 19, 18, 17, 17, 17, 17, 18, 17, 16, 18, 18, 18, 18, 18, 16, 17, 19, 18, 17, 17, 17, 17, 19, 18, 17, 19, 19, 19, 17, 16, 15, 15, 15, 15, 15, 16, 15, 14, 13, 16, 16, 19, 17, 16, 13, 13, 15, 16, 13, 11, 15, 11, 35, 39, 62, 64, 65, 66, 66, 68, 71, 73, 80, 77, 74, 77, 78, 77, 76, 77, 78, 77, 78, 78, 79, 80, 81, 82, 83, 84, 86, 87, 87, 87, 87, 87, 91, 92, 93, 95, 93, 94, 84, 47, 57, 58, 62, 69, 68, 80, 87, 98, 98, 105, 108, 118, 119, 124, 119, 126, 114, 126, 155, 178, 194, 202, 221, 233, 245, 248, 249, 252, 254, 254, 254, 254, 254, 254, 254, 254, 254, 254, 254, 254, 254, 254, 254, 254, 254, 254, 254, 254, 254, 254, 254, 254, 254, 254, 254, 254, 254, 254, 254, 254, 254, 254, 254, 254, 254, 254, 254, 254, 254, 254, 254, 254, 254, 254, 254, 254, 254, 254, 254, 254, 254, 254, 254, 254, 254, 254, 254, 254, 255, 254, 253, 255, 252, 253, 243, 237, 232, 216, 203, 182, 150, 133, 123, 127, 130, 137, 138, 126, 126, 109, 92, 82, 79, 83, 81, 67, 64, 73, 84, 93, 98, 90, 99, 107, 109, 109, 114, 120, 117, 111, 110, 106, 105, 105, 98, 98, 97, 97, 98, 90, 94, 92, 79, 38, 25, 31, 26, 26, 26, 25, 25, 25, 22, 23, 22, 25, 25, 24, 22, 20, 19, 19, 18, 17, 17, 17, 17, 17, 18, 17, 16, 17, 17, 17, 18, 17, 16, 16, 18, 17, 17, 17, 17, 17, 19, 18, 17, 19, 19, 19, 17, 16, 15, 15, 15, 15, 15, 15, 14, 14, 14, 15, 14, 13, 13, 13, 16, 16, 16, 14, 13, 13, 11, 9, 13, 16, 65, 67, 69, 70, 70, 69, 67, 70, 80, 79, 78, 78, 75, 77, 75, 79, 80, 79, 79, 80, 80, 80, 81, 82, 84, 86, 86, 87, 88, 87, 87, 87, 93, 94, 95, 97, 97, 97, 94, 48, 54, 62, 63, 70, 61, 79, 85, 95, 99, 110, 111, 118, 118, 125, 130, 122, 124, 138, 153, 172, 199, 212, 229, 233, 245, 248, 249, 252, 254, 254, 254, 254, 254, 254, 254, 254, 254, 254, 254, 254, 254, 254, 254, 254, 254, 254, 254, 254, 254, 254, 254, 254, 254, 254, 254, 254, 254, 254, 254, 254, 254, 254, 254, 254, 254, 254, 254, 254, 254, 254, 254, 254, 254, 254, 254, 254, 254, 254, 254, 254, 254, 254, 254, 254, 254, 254, 254, 254, 253, 252, 251, 250, 246, 243, 227, 204, 184, 158, 138, 124, 123, 122, 122, 124, 125, 126, 132, 109, 97, 92, 90, 90, 78, 65, 73, 75, 85, 90, 99, 94, 99, 104, 107, 114, 114, 116, 120, 119, 116, 116, 116, 115, 114, 112, 102, 100, 98, 97, 98, 90, 92, 72, 29, 24, 29, 24, 26, 26, 26, 25, 25, 25, 25, 24, 25, 25, 25, 26, 21, 19, 18, 18, 17, 17, 16, 17, 17, 17, 18, 17, 16, 16, 16, 16, 17, 16, 15, 15, 17, 17, 17, 17, 17, 17, 20, 19, 18, 19, 19, 19, 18, 16, 16, 15, 16, 16, 16, 16, 15, 14, 16, 14, 13, 12, 13, 15, 17, 16, 14, 12, 13, 13, 9, 7, 16, 2, 68, 69, 69, 68, 68, 67, 65, 72, 84, 80, 76, 74, 73, 76, 78, 79, 79, 78, 79, 80, 79, 78, 80, 82, 85, 86, 87, 88, 89, 89, 89, 89, 94, 96, 96, 96, 99, 98, 95, 59, 53, 57, 59, 70, 73, 73, 87, 97, 96, 108, 111, 121, 119, 125, 122, 123, 135, 131, 147, 175, 192, 204, 225, 230, 245, 248, 249, 252, 254, 254, 254, 254, 254, 254, 254, 254, 254, 254, 254, 254, 254, 254, 254, 254, 254, 254, 254, 254, 254, 254, 254, 254, 254, 254, 254, 254, 254, 254, 254, 254, 254, 254, 254, 254, 254, 254, 254, 254, 254, 254, 254, 254, 254, 254, 254, 254, 254, 254, 254, 254, 254, 254, 254, 254, 254, 254, 254, 254, 243, 244, 235, 224, 201, 178, 157, 142, 134, 128, 128, 131, 130, 133, 129, 119, 119, 109, 92, 84, 93, 95, 87, 76, 71, 75, 85, 89, 90, 91, 99, 112, 117, 113, 115, 118, 117, 116, 119, 116, 116, 120, 122, 123, 123, 120, 111, 101, 98, 95, 95, 86, 54, 24, 26, 25, 25, 26, 24, 24, 24, 25, 25, 25, 25, 25, 25, 26, 27, 26, 21, 19, 18, 17, 17, 16, 15, 17, 17, 17, 18, 17, 16, 14, 14, 14, 15, 16, 15, 14, 15, 16, 17, 17, 17, 17, 21, 20, 19, 19, 19, 19, 17, 17, 16, 15, 17, 17, 17, 16, 15, 14, 14, 12, 14, 14, 14, 14, 13, 11, 9, 13, 10, 12, 11, 13, 10, 6, 17, 4, 68, 70, 68, 65, 64, 65, 68, 80, 86, 79, 72, 71, 75, 76, 80, 78, 78, 76, 77, 81, 78, 77, 81, 83, 87, 89, 88, 90, 91, 92, 92, 92, 96, 96, 98, 96, 99, 99, 99, 76, 51, 53, 60, 66, 73, 82, 91, 96, 96, 105, 111, 121, 122, 125, 129, 137, 135, 147, 154, 174, 188, 211, 225, 225, 244, 248, 249, 252, 254, 254, 254, 254, 254, 254, 254, 252, 251, 254, 254, 254, 254, 254, 254, 254, 254, 254, 254, 254, 254, 254, 254, 254, 254, 254, 254, 254, 254, 254, 254, 254, 254, 254, 254, 254, 254, 253, 252, 252, 252, 254, 254, 254, 254, 254, 254, 253, 253, 253, 253, 252, 253, 252, 251, 251, 250, 249, 246, 237, 217, 199, 175, 153, 137, 129, 133, 133, 128, 130, 130, 129, 133, 132, 125, 110, 94, 83, 88, 92, 85, 73, 74, 78, 89, 96, 99, 92, 96, 101, 114, 118, 120, 123, 124, 123, 121, 117, 114, 115, 119, 122, 122, 122, 125, 125, 118, 106, 97, 96, 78, 39, 19, 27, 24, 22, 24, 20, 21, 22, 22, 23, 23, 22, 25, 24, 25, 25, 25, 24, 21, 20, 18, 18, 17, 16, 15, 17, 17, 17, 17, 17, 16, 17, 17, 17, 17, 18, 17, 17, 17, 17, 18, 18, 18, 18, 21, 19, 19, 18, 18, 18, 18, 18, 17, 17, 18, 18, 19, 16, 14, 12, 14, 13, 15, 13, 13, 14, 14, 12, 8, 11, 12, 13, 10, 11, 11, 9, 8, 64, 68, 66, 66, 67, 68, 71, 82, 80, 76, 73, 71, 75, 77, 80, 78, 76, 73, 76, 81, 78, 79, 82, 84, 90, 93, 91, 91, 92, 93, 94, 96, 97, 95, 98, 98, 98, 97, 97, 84, 46, 55, 56, 65, 70, 88, 85, 102, 102, 108, 110, 115, 124, 130, 132, 140, 126, 140, 159, 182, 183, 210, 224, 226, 245, 247, 249, 252, 254, 255, 254, 254, 255, 255, 254, 250, 250, 253, 254, 250, 255, 254, 254, 254, 254, 254, 254, 254, 254, 254, 254, 254, 254, 254, 254, 254, 254, 254, 254, 254, 254, 254, 254, 254, 254, 252, 251, 251, 249, 254, 255, 255, 255, 255, 255, 252, 251, 250, 251, 251, 252, 249, 246, 242, 230, 214, 193, 171, 147, 136, 130, 130, 132, 134, 137, 139, 135, 131, 125, 119, 125, 121, 109, 90, 90, 99, 96, 81, 75, 76, 86, 96, 98, 93, 104, 104, 113, 116, 117, 121, 127, 127, 127, 127, 124, 120, 113, 115, 120, 118, 119, 115, 116, 124, 120, 108, 96, 55, 26, 19, 20, 21, 22, 22, 22, 21, 20, 21, 22, 20, 19, 19, 27, 26, 25, 23, 22, 21, 21, 20, 19, 19, 18, 17, 16, 17, 17, 17, 16, 16, 16, 20, 20, 20, 20, 20, 20, 20, 19, 19, 19, 20, 20, 20, 20, 19, 20, 18, 18, 18, 20, 20, 20, 20, 19, 18, 18, 14, 15, 15, 17, 16, 15, 9, 11, 14, 16, 12, 8, 13, 10, 14, 9, 13, 11, 14, 14, 63, 64, 67, 69, 70, 68, 73, 84, 80, 74, 74, 74, 76, 79, 79, 78, 76, 75, 76, 79, 83, 85, 86, 87, 91, 94, 93, 93, 93, 94, 95, 96, 95, 96, 97, 97, 96, 95, 91, 92, 47, 51, 54, 63, 70, 80, 86, 98, 101, 107, 116, 122, 125, 131, 137, 148, 142, 149, 150, 178, 198, 215, 219, 229, 247, 248, 250, 252, 254, 255, 248, 247, 249, 251, 255, 254, 254, 248, 245, 241, 254, 254, 254, 254, 254, 254, 254, 254, 254, 254, 254, 254, 254, 254, 254, 254, 254, 254, 254, 254, 254, 254, 254, 254, 254, 254, 254, 254, 254, 254, 254, 254, 253, 254, 254, 245, 247, 249, 249, 246, 242, 232, 214, 193, 170, 154, 141, 135, 131, 132, 133, 131, 134, 133, 137, 136, 131, 125, 123, 120, 113, 99, 96, 96, 98, 87, 78, 74, 84, 100, 107, 99, 96, 105, 124, 124, 123, 121, 123, 124, 129, 128, 128, 127, 125, 122, 117, 118, 120, 120, 119, 103, 108, 110, 100, 58, 23, 16, 24, 20, 21, 22, 22, 22, 22, 22, 22, 22, 23, 20, 19, 18, 25, 24, 24, 22, 21, 21, 20, 20, 19, 18, 18, 17, 16, 17, 17, 17, 16, 16, 16, 20, 20, 20, 19, 19, 19, 19, 19, 19, 19, 20, 20, 20, 19, 19, 19, 17, 17, 17, 20, 21, 21, 20, 18, 16, 14, 15, 17, 18, 15, 14, 14, 9, 13, 10, 14, 16, 8, 11, 8, 16, 15, 15, 16, 14, 9, 67, 69, 69, 66, 64, 65, 74, 86, 84, 78, 75, 77, 78, 81, 78, 78, 81, 81, 81, 86, 90, 92, 89, 90, 93, 95, 92, 95, 97, 98, 95, 93, 94, 96, 96, 93, 95, 98, 99, 99, 68, 49, 53, 62, 68, 72, 77, 92, 99, 104, 118, 115, 123, 136, 138, 147, 148, 156, 159, 170, 192, 207, 220, 228, 249, 249, 252, 252, 253, 254, 246, 244, 245, 246, 249, 251, 250, 220, 238, 236, 250, 252, 255, 254, 254, 254, 254, 254, 254, 254, 254, 254, 254, 254, 254, 254, 254, 254, 254, 254, 254, 254, 252, 252, 253, 254, 255, 255, 255, 254, 252, 252, 249, 249, 249, 245, 245, 242, 230, 211, 189, 171, 152, 139, 135, 137, 141, 140, 134, 134, 136, 136, 135, 136, 132, 128, 125, 122, 105, 95, 95, 108, 100, 102, 75, 67, 77, 98, 108, 106, 97, 102, 114, 124, 128, 126, 126, 125, 126, 125, 129, 128, 126, 123, 123, 124, 120, 119, 119, 116, 117, 107, 96, 61, 5, 12, 19, 21, 17, 20, 21, 22, 23, 23, 23, 23, 21, 21, 20, 20, 19, 19, 24, 23, 22, 21, 21, 20, 19, 19, 18, 17, 18, 17, 16, 17, 17, 17, 16, 16, 16, 20, 20, 20, 18, 18, 18, 18, 19, 19, 19, 20, 20, 20, 18, 19, 18, 16, 16, 16, 17, 18, 18, 18, 16, 15, 14, 16, 15, 14, 14, 13, 12, 9, 11, 12, 13, 11, 13, 14, 29, 23, 15, 18, 19, 18, 66, 72, 67, 64, 59, 64, 78, 90, 86, 78, 76, 78, 79, 78, 79, 84, 86, 87, 86, 92, 92, 93, 91, 91, 94, 96, 96, 95, 94, 96, 96, 96, 93, 96, 95, 95, 96, 98, 98, 100, 98, 57, 55, 63, 71, 67, 85, 82, 98, 111, 110, 117, 127, 136, 138, 149, 156, 159, 162, 176, 186, 207, 228, 223, 251, 252, 253, 252, 252, 252, 253, 251, 245, 241, 237, 223, 95, 66, 75, 155, 248, 252, 254, 254, 254, 254, 254, 254, 254, 254, 254, 254, 254, 254, 254, 254, 254, 254, 254, 254, 254, 254, 251, 252, 252, 254, 255, 255, 255, 250, 249, 248, 246, 243, 240, 221, 210, 185, 168, 151, 141, 137, 138, 139, 137, 140, 139, 140, 137, 135, 134, 135, 132, 131, 127, 129, 117, 97, 93, 98, 97, 96, 76, 68, 80, 91, 97, 108, 103, 94, 115, 126, 130, 128, 136, 138, 131, 128, 127, 124, 128, 126, 124, 124, 122, 120, 120, 120, 119, 113, 111, 41, 20, 20, 17, 24, 22, 25, 25, 22, 23, 24, 26, 27, 27, 26, 22, 21, 19, 24, 23, 22, 23, 22, 21, 21, 20, 19, 19, 19, 17, 17, 18, 17, 16, 17, 17, 17, 16, 16, 16, 20, 20, 20, 18, 18, 18, 18, 19, 19, 19, 20, 20, 20, 17, 20, 17, 16, 16, 16, 16, 16, 16, 16, 16, 16, 17, 14, 14, 14, 13, 12, 11, 11, 12, 11, 11, 16, 13, 27, 45, 21, 15, 19, 17, 15, 64, 63, 61, 62, 62, 67, 82, 87, 84, 79, 80, 80, 80, 85, 88, 90, 86, 88, 89, 90, 94, 93, 91, 90, 93, 91, 96, 94, 94, 96, 96, 98, 94, 94, 96, 97, 98, 99, 101, 101, 98, 93, 68, 58, 66, 68, 75, 87, 90, 102, 112, 129, 133, 141, 157, 160, 160, 159, 161, 171, 199, 205, 224, 236, 251, 250, 250, 251, 247, 249, 253, 253, 239, 231, 189, 111, 46, 46, 50, 68, 154, 247, 249, 254, 254, 254, 254, 254, 254, 254, 254, 254, 254, 254, 254, 254, 254, 254, 254, 254, 254, 254, 250, 248, 249, 252, 253, 253, 253, 244, 243, 237, 227, 211, 195, 171, 159, 149, 143, 141, 138, 136, 136, 136, 137, 141, 143, 144, 136, 135, 135, 127, 128, 123, 106, 97, 96, 98, 97, 88, 73, 68, 78, 88, 97, 111, 99, 105, 106, 124, 125, 130, 131, 133, 135, 132, 133, 128, 126, 126, 128, 125, 125, 124, 124, 123, 119, 117, 118, 114, 90, 51, 30, 30, 28, 22, 25, 30, 35, 23, 21, 21, 21, 21, 22, 23, 24, 23, 22, 21, 21, 22, 24, 24, 22, 19, 19, 19, 20, 20, 18, 17, 16, 16, 16, 18, 17, 16, 16, 16, 16, 20, 20, 20, 20, 20, 18, 18, 18, 19, 20, 18, 17, 16, 17, 17, 17, 16, 16, 16, 17, 17, 15, 15, 14, 14, 14, 12, 12, 12, 14, 13, 12, 13, 12, 9, 9, 17, 24, 67, 57, 25, 23, 20, 18, 17, 61, 59, 62, 63, 65, 73, 86, 88, 84, 80, 80, 84, 87, 88, 88, 88, 88, 90, 90, 90, 91, 90, 90, 92, 87, 92, 91, 89, 88, 94, 94, 96, 94, 93, 96, 99, 99, 100, 104, 104, 102, 101, 98, 81, 71, 66, 83, 87, 85, 91, 108, 119, 132, 139, 147, 153, 160, 164, 174, 179, 202, 214, 232, 239, 252, 252, 253, 250, 250, 249, 252, 247, 223, 158, 114, 46, 24, 38, 47, 63, 71, 243, 250, 254, 254, 254, 254, 254, 254, 254, 254, 254, 254, 254, 254, 254, 254, 254, 254, 254, 254, 254, 252, 251, 249, 247, 245, 239, 232, 217, 205, 193, 175, 162, 152, 148, 146, 148, 141, 139, 136, 136, 138, 137, 137, 140, 141, 140, 136, 131, 125, 122, 111, 97, 92, 96, 97, 93, 82, 67, 67, 80, 97, 106, 114, 96, 99, 124, 128, 128, 126, 127, 129, 131, 132, 131, 131, 127, 126, 125, 128, 126, 124, 122, 121, 121, 118, 119, 120, 120, 90, 46, 42, 36, 35, 32, 28, 22, 28, 26, 26, 22, 18, 17, 19, 24, 25, 26, 27, 24, 23, 22, 23, 22, 22, 20, 20, 20, 20, 20, 18, 17, 16, 16, 16, 18, 17, 16, 16, 16, 16, 20, 20, 20, 20, 20, 18, 18, 18, 19, 20, 18, 17, 16, 17, 17, 17, 16, 16, 16, 17, 17, 15, 15, 14, 14, 14, 13, 13, 13, 14, 13, 12, 14, 11, 7, 14, 14, 52, 70, 75, 40, 31, 22, 18, 18, 63, 68, 67, 67, 69, 77, 88, 87, 82, 80, 82, 83, 83, 88, 87, 87, 88, 89, 87, 85, 83, 81, 82, 83, 79, 83, 81, 82, 92, 94, 94, 97, 96, 95, 97, 100, 101, 101, 105, 107, 106, 105, 108, 103, 104, 90, 73, 84, 92, 95, 103, 114, 132, 139, 148, 159, 168, 169, 185, 192, 210, 221, 237, 249, 255, 254, 252, 252, 249, 245, 231, 196, 128, 108, 63, 29, 30, 39, 45, 55, 64, 207, 243, 254, 254, 254, 254, 254, 254, 254, 254, 254, 254, 254, 254, 254, 254, 254, 254, 254, 254, 254, 252, 251, 245, 237, 227, 211, 191, 167, 150, 144, 145, 145, 146, 142, 144, 141, 142, 141, 140, 140, 142, 140, 139, 139, 139, 137, 130, 125, 113, 98, 92, 98, 91, 91, 84, 73, 69, 77, 88, 95, 104, 102, 101, 119, 126, 129, 129, 123, 125, 124, 126, 126, 128, 127, 126, 124, 126, 126, 127, 127, 124, 122, 121, 120, 117, 117, 120, 120, 114, 74, 56, 39, 34, 36, 34, 26, 15, 16, 19, 22, 17, 15, 16, 21, 22, 23, 24, 25, 24, 23, 23, 20, 21, 21, 21, 21, 20, 20, 18, 17, 16, 16, 16, 18, 17, 16, 16, 16, 16, 20, 20, 20, 20, 20, 18, 18, 18, 19, 20, 18, 17, 16, 17, 17, 17, 16, 16, 16, 17, 17, 15, 15, 14, 14, 14, 13, 13, 13, 14, 13, 12, 15, 11, 13, 10, 14, 31, 68, 68, 78, 68, 39, 28, 23, 21, 70, 69, 70, 71, 72, 80, 89, 84, 79, 78, 79, 80, 80, 85, 85, 86, 84, 84, 82, 77, 76, 79, 79, 78, 82, 78, 82, 89, 91, 96, 96, 98, 98, 97, 99, 101, 102, 103, 107, 109, 109, 110, 110, 108, 109, 112, 112, 91, 65, 62, 86, 97, 123, 142, 164, 170, 180, 188, 192, 189, 211, 223, 246, 253, 254, 255, 254, 249, 249, 232, 151, 92, 77, 49, 20, 39, 51, 37, 41, 51, 64, 91, 241, 254, 254, 254, 254, 254, 254, 254, 254, 254, 254, 254, 254, 254, 254, 254, 254, 254, 254, 254, 253, 248, 231, 213, 187, 166, 144, 113, 125, 133, 140, 148, 147, 146, 146, 131, 144, 142, 142, 143, 147, 144, 141, 140, 138, 135, 123, 107, 98, 100, 100, 95, 82, 70, 68, 75, 80, 90, 98, 92, 85, 104, 127, 132, 130, 132, 132, 128, 124, 124, 124, 124, 122, 123, 122, 123, 125, 126, 127, 128, 124, 123, 122, 121, 115, 115, 118, 121, 124, 115, 79, 42, 41, 33, 31, 29, 21, 27, 25, 32, 22, 21, 20, 19, 20, 19, 19, 22, 23, 24, 23, 19, 20, 21, 21, 21, 20, 20, 18, 17, 16, 16, 16, 18, 17, 16, 16, 16, 16, 20, 20, 20, 20, 20, 18, 18, 18, 19, 20, 18, 17, 16, 17, 17, 17, 16, 16, 16, 17, 17, 15, 15, 14, 14, 14, 14, 14, 14, 14, 13, 12, 15, 12, 15, 21, 55, 67, 75, 81, 79, 60, 33, 27, 25, 72, 71, 70, 78, 75, 78, 82, 81, 77, 75, 77, 78, 78, 84, 83, 84, 82, 79, 79, 81, 82, 84, 88, 81, 83, 83, 93, 95, 97, 97, 98, 99, 100, 100, 100, 101, 104, 104, 107, 106, 101, 98, 99, 104, 107, 111, 115, 118, 120, 114, 96, 68, 69, 86, 92, 112, 131, 152, 161, 190, 222, 235, 250, 246, 255, 252, 249, 235, 196, 113, 91, 85, 52, 28, 31, 31, 30, 41, 42, 39, 48, 45, 129, 244, 244, 250, 248, 253, 254, 254, 255, 255, 255, 255, 255, 250, 255, 255, 252, 247, 241, 236, 188, 181, 157, 154, 135, 118, 65, 54, 47, 57, 99, 127, 125, 132, 133, 117, 85, 103, 131, 144, 150, 147, 135, 127, 115, 96, 97, 102, 96, 86, 86, 75, 59, 66, 76, 89, 103, 109, 89, 110, 130, 136, 135, 133, 130, 131, 130, 129, 128, 127, 129, 127, 132, 133, 131, 131, 131, 126, 126, 126, 126, 121, 122, 121, 120, 121, 121, 121, 119, 118, 120, 97, 62, 59, 52, 37, 27, 16, 14, 14, 20, 21, 18, 17, 13, 17, 22, 21, 25, 27, 21, 20, 19, 16, 14, 14, 16, 17, 17, 17, 18, 18, 18, 16, 15, 14, 16, 16, 16, 19, 19, 19, 19, 19, 19, 19, 18, 18, 18, 18, 18, 18, 19, 19, 19, 20, 18, 17, 17, 17, 15, 15, 16, 15, 14, 14, 13, 12, 13, 13, 13, 10, 4, 12, 19, 50, 70, 73, 73, 73, 71, 70, 52, 35, 31, 73, 75, 72, 70, 75, 78, 80, 78, 73, 72, 79, 80, 79, 81, 84, 77, 76, 80, 85, 84, 82, 80, 81, 83, 86, 95, 97, 97, 98, 97, 98, 99, 102, 103, 105, 107, 106, 107, 113, 114, 111, 110, 111, 114, 119, 114, 115, 118, 120, 125, 128, 130, 121, 113, 119, 131, 155, 171, 183, 214, 244, 255, 252, 252, 247, 246, 231, 162, 93, 77, 72, 36, 22, 30, 30, 29, 29, 36, 35, 35, 31, 37, 49, 170, 241, 243, 241, 248, 251, 252, 251, 254, 254, 254, 250, 245, 247, 244, 235, 218, 207, 182, 125, 126, 121, 111, 95, 48, 97, 98, 91, 42, 49, 64, 80, 96, 109, 114, 123, 100, 94, 73, 109, 133, 128, 109, 91, 101, 110, 103, 88, 72, 64, 75, 86, 84, 92, 103, 91, 93, 120, 130, 132, 133, 133, 129, 131, 127, 127, 126, 125, 126, 133, 132, 132, 131, 133, 131, 131, 126, 126, 126, 126, 123, 124, 123, 122, 122, 121, 121, 119, 119, 120, 122, 111, 70, 44, 55, 41, 24, 23, 27, 21, 19, 17, 17, 21, 21, 17, 19, 17, 16, 16, 18, 20, 17, 17, 17, 18, 18, 18, 18, 18, 18, 18, 18, 17, 16, 16, 16, 16, 19, 19, 19, 19, 19, 19, 19, 18, 18, 18, 19, 19, 19, 19, 19, 19, 20, 18, 17, 17, 17, 15, 15, 15, 14, 14, 13, 12, 12, 13, 11, 9, 9, 14, 33, 62, 68, 75, 73, 72, 70, 69, 64, 44, 36, 76, 79, 74, 73, 73, 78, 82, 77, 72, 73, 79, 79, 77, 81, 79, 79, 83, 82, 83, 84, 85, 86, 83, 94, 93, 96, 100, 99, 99, 101, 102, 103, 104, 106, 109, 111, 109, 111, 119, 122, 122, 121, 122, 124, 129, 115, 116, 119, 126, 125, 129, 148, 152, 159, 171, 178, 200, 217, 247, 255, 255, 255, 253, 247, 225, 206, 114, 84, 80, 49, 22, 20, 28, 24, 29, 27, 26, 27, 28, 28, 33, 37, 38, 40, 105, 204, 238, 238, 241, 243, 243, 246, 247, 246, 240, 230, 221, 206, 186, 170, 147, 126, 114, 119, 88, 74, 72, 52, 114, 93, 92, 43, 50, 52, 57, 71, 80, 97, 129, 83, 92, 82, 72, 73, 95, 93, 101, 96, 98, 75, 64, 72, 91, 100, 99, 99, 89, 74, 110, 125, 124, 128, 131, 129, 121, 119, 126, 136, 135, 134, 136, 135, 138, 134, 132, 130, 134, 128, 128, 124, 126, 126, 126, 125, 125, 124, 123, 123, 121, 121, 120, 119, 121, 121, 116, 111, 99, 53, 54, 46, 37, 32, 32, 26, 16, 14, 24, 23, 16, 18, 14, 12, 19, 18, 16, 17, 16, 16, 16, 17, 19, 19, 19, 19, 19, 19, 18, 17, 17, 17, 17, 20, 20, 20, 20, 20, 20, 20, 19, 19, 19, 20, 20, 20, 19, 19, 19, 19, 18, 18, 17, 17, 15, 15, 14, 14, 13, 12, 12, 12, 11, 13, 10, 12, 16, 24, 48, 71, 69, 76, 74, 72, 71, 69, 67, 62, 41, 76, 76, 74, 78, 77, 80, 83, 77, 76, 78, 79, 78, 76, 81, 83, 84, 82, 82, 85, 91, 93, 96, 97, 98, 101, 100, 104, 106, 107, 109, 110, 111, 113, 113, 114, 117, 118, 119, 121, 121, 122, 123, 122, 124, 127, 116, 121, 126, 128, 138, 146, 168, 176, 191, 207, 233, 252, 254, 255, 255, 255, 250, 248, 242, 164, 83, 80, 60, 37, 11, 27, 28, 25, 27, 27, 25, 24, 23, 24, 26, 30, 38, 37, 31, 47, 45, 80, 147, 223, 240, 243, 240, 237, 229, 214, 191, 175, 160, 148, 139, 130, 102, 103, 109, 77, 93, 90, 78, 85, 98, 93, 49, 40, 48, 51, 61, 59, 69, 104, 90, 100, 96, 84, 91, 102, 98, 85, 64, 51, 58, 79, 91, 97, 99, 103, 82, 101, 127, 126, 130, 137, 133, 130, 131, 125, 129, 136, 137, 136, 136, 136, 134, 136, 131, 132, 132, 131, 130, 130, 127, 126, 126, 126, 124, 124, 123, 124, 124, 122, 121, 121, 120, 122, 120, 119, 119, 113, 119, 92, 60, 58, 55, 41, 32, 24, 24, 24, 17, 17, 18, 18, 19, 19, 18, 16, 16, 18, 18, 14, 14, 17, 18, 20, 20, 20, 19, 18, 18, 19, 19, 19, 21, 21, 21, 21, 21, 21, 21, 20, 20, 20, 19, 19, 19, 19, 19, 19, 18, 18, 18, 17, 17, 15, 15, 14, 13, 12, 13, 10, 11, 12, 13, 10, 13, 10, 18, 24, 39, 57, 65, 71, 73, 76, 75, 72, 71, 69, 70, 58, 73, 74, 76, 76, 83, 84, 83, 81, 80, 81, 83, 86, 85, 81, 85, 89, 82, 84, 88, 90, 97, 103, 106, 106, 109, 109, 112, 112, 113, 117, 117, 117, 119, 119, 121, 121, 121, 119, 111, 110, 111, 114, 117, 122, 122, 132, 135, 143, 151, 165, 174, 189, 219, 247, 252, 255, 255, 255, 255, 254, 248, 238, 230, 131, 72, 65, 53, 26, 25, 22, 30, 31, 28, 27, 25, 25, 25, 19, 21, 23, 31, 31, 35, 28, 31, 38, 44, 46, 60, 85, 164, 224, 205, 181, 169, 158, 153, 151, 147, 149, 128, 113, 115, 109, 88, 99, 100, 97, 77, 106, 100, 61, 51, 47, 49, 73, 67, 41, 87, 104, 93, 93, 96, 104, 92, 80, 64, 55, 74, 88, 97, 102, 100, 73, 97, 126, 128, 127, 129, 133, 131, 128, 127, 131, 124, 133, 138, 136, 136, 135, 137, 135, 133, 133, 133, 133, 132, 132, 131, 130, 128, 128, 125, 126, 126, 125, 123, 125, 124, 120, 120, 120, 117, 120, 120, 122, 124, 124, 126, 115, 96, 58, 62, 43, 37, 26, 22, 16, 15, 16, 21, 27, 18, 18, 19, 15, 19, 22, 17, 15, 16, 16, 16, 19, 20, 21, 21, 20, 19, 19, 19, 20, 20, 20, 20, 20, 20, 20, 20, 20, 20, 19, 19, 19, 19, 17, 16, 18, 17, 16, 14, 14, 13, 14, 14, 13, 12, 11, 13, 11, 9, 13, 10, 21, 33, 54, 60, 63, 72, 75, 75, 74, 75, 74, 75, 74, 70, 75, 79, 78, 75, 89, 86, 82, 81, 80, 80, 83, 85, 85, 83, 86, 93, 95, 95, 96, 98, 102, 106, 108, 109, 110, 112, 116, 116, 116, 118, 117, 117, 115, 115, 115, 117, 117, 115, 107, 108, 113, 118, 121, 125, 132, 153, 158, 168, 176, 207, 239, 247, 252, 253, 253, 252, 252, 251, 252, 242, 234, 177, 98, 63, 59, 44, 27, 28, 32, 33, 32, 32, 28, 25, 25, 26, 26, 20, 21, 23, 26, 30, 34, 26, 36, 32, 32, 28, 36, 45, 37, 56, 82, 151, 148, 153, 152, 153, 151, 151, 139, 102, 108, 107, 83, 106, 102, 85, 63, 100, 102, 79, 70, 67, 74, 80, 81, 41, 89, 92, 110, 106, 88, 73, 81, 84, 85, 88, 94, 101, 97, 94, 65, 80, 123, 132, 130, 129, 129, 129, 133, 132, 134, 128, 130, 137, 138, 137, 137, 136, 135, 134, 135, 136, 133, 133, 133, 131, 130, 129, 128, 128, 126, 124, 125, 124, 124, 124, 123, 122, 120, 119, 118, 122, 123, 126, 128, 129, 130, 128, 130, 112, 87, 60, 55, 44, 28, 26, 28, 33, 32, 33, 14, 14, 15, 17, 19, 19, 16, 15, 15, 15, 16, 15, 15, 19, 20, 18, 20, 20, 20, 21, 21, 21, 20, 20, 20, 20, 20, 20, 20, 19, 19, 19, 20, 18, 16, 18, 17, 16, 14, 13, 13, 13, 14, 13, 12, 13, 13, 13, 10, 13, 10, 19, 31, 54, 66, 63, 65, 68, 72, 75, 75, 77, 77, 77, 77, 73, 80, 78, 79, 83, 86, 78, 80, 81, 81, 81, 84, 87, 87, 90, 90, 97, 101, 100, 98, 99, 106, 113, 115, 115, 114, 114, 113, 113, 113, 114, 112, 111, 112, 111, 111, 114, 116, 118, 115, 120, 129, 137, 143, 148, 152, 166, 183, 213, 239, 255, 254, 245, 245, 248, 249, 247, 247, 247, 242, 226, 152, 70, 56, 51, 43, 26, 28, 28, 32, 33, 31, 28, 23, 21, 23, 26, 29, 21, 21, 23, 26, 27, 29, 26, 40, 60, 96, 115, 95, 44, 92, 90, 78, 100, 122, 133, 145, 143, 137, 146, 145, 89, 99, 101, 75, 109, 96, 76, 66, 86, 96, 83, 69, 71, 73, 91, 85, 44, 90, 89, 95, 70, 73, 87, 88, 88, 92, 101, 92, 90, 85, 79, 72, 73, 85, 94, 115, 125, 131, 127, 133, 136, 137, 136, 137, 138, 138, 137, 138, 137, 136, 137, 135, 134, 133, 133, 133, 131, 130, 129, 128, 129, 128, 126, 127, 126, 126, 123, 123, 124, 120, 118, 120, 125, 127, 128, 127, 129, 130, 131, 125, 130, 125, 104, 70, 58, 45, 51, 46, 40, 31, 24, 13, 12, 11, 15, 17, 18, 16, 15, 15, 15, 14, 14, 14, 18, 18, 17, 19, 19, 19, 21, 21, 21, 20, 20, 20, 20, 20, 20, 20, 19, 19, 19, 20, 18, 16, 17, 16, 15, 13, 13, 13, 13, 14, 13, 12, 13, 12, 13, 10, 15, 28, 45, 72, 73, 68, 67, 65, 68, 74, 76, 78, 79, 79, 78, 77, 80, 78, 78, 77, 79, 79, 83, 84, 85, 87, 93, 96, 96, 98, 97, 96, 102, 104, 101, 97, 102, 105, 106, 105, 104, 104, 107, 107, 107, 110, 110, 111, 114, 115, 117, 120, 124, 128, 134, 142, 157, 168, 174, 181, 207, 232, 251, 255, 254, 250, 247, 248, 248, 249, 249, 250, 249, 246, 201, 102, 42, 47, 41, 29, 22, 26, 20, 24, 26, 27, 26, 24, 20, 18, 21, 27, 31, 22, 22, 22, 26, 25, 28, 66, 108, 126, 139, 114, 112, 112, 68, 49, 43, 50, 59, 77, 99, 107, 115, 110, 105, 89, 107, 111, 92, 106, 96, 51, 71, 63, 79, 70, 65, 65, 60, 65, 61, 67, 102, 100, 91, 91, 91, 86, 88, 98, 86, 73, 89, 94, 104, 108, 93, 87, 72, 69, 89, 78, 97, 117, 120, 137, 138, 140, 140, 139, 138, 138, 139, 137, 138, 138, 136, 133, 133, 133, 133, 132, 131, 130, 128, 129, 129, 128, 129, 127, 125, 124, 123, 123, 121, 120, 120, 128, 128, 128, 124, 125, 126, 129, 135, 132, 135, 135, 122, 88, 60, 46, 45, 44, 32, 20, 25, 19, 15, 13, 14, 17, 17, 16, 16, 16, 14, 14, 14, 18, 19, 18, 18, 18, 18, 20, 20, 20, 20, 20, 20, 20, 20, 20, 20, 19, 19, 19, 18, 16, 15, 16, 16, 15, 13, 13, 13, 13, 14, 13, 12, 11, 11, 13, 25, 41, 65, 79, 79, 77, 71, 66, 66, 69, 74, 77, 79, 79, 77, 79, 76, 79, 77, 76, 82, 80, 86, 89, 91, 94, 101, 103, 103, 101, 98, 92, 89, 92, 91, 86, 92, 100, 107, 109, 109, 107, 103, 103, 103, 107, 111, 113, 120, 123, 130, 134, 144, 149, 154, 162, 178, 198, 228, 251, 253, 255, 255, 254, 250, 248, 245, 251, 250, 248, 247, 246, 242, 177, 66, 41, 41, 37, 29, 30, 25, 21, 23, 25, 26, 25, 27, 24, 20, 20, 21, 29, 28, 22, 23, 23, 27, 23, 33, 108, 101, 104, 102, 86, 69, 44, 28, 34, 39, 40, 41, 45, 61, 70, 79, 84, 69, 86, 98, 119, 125, 111, 102, 64, 55, 42, 60, 64, 53, 56, 53, 58, 72, 105, 113, 108, 97, 91, 84, 77, 98, 71, 62, 86, 97, 104, 106, 102, 108, 102, 98, 91, 91, 66, 62, 77, 111, 133, 139, 134, 141, 140, 140, 139, 138, 137, 135, 138, 137, 135, 133, 133, 133, 134, 133, 133, 128, 131, 131, 128, 128, 127, 125, 126, 126, 123, 123, 123, 120, 126, 127, 126, 123, 123, 124, 130, 128, 133, 137, 126, 120, 106, 93, 73, 49, 34, 30, 33, 42, 34, 24, 18, 15, 13, 10, 14, 16, 16, 17, 19, 18, 17, 16, 17, 17, 17, 18, 19, 16, 16, 16, 18, 18, 18, 19, 21, 20, 21, 20, 19, 19, 17, 15, 13, 16, 15, 14, 13, 13, 13, 13, 13, 13, 13, 9, 11, 19, 35, 61, 82, 84, 83, 80, 73, 70, 66, 65, 72, 76, 79, 78, 78, 79, 77, 73, 73, 81, 83, 84, 89, 93, 96, 98, 99, 99, 99, 95, 90, 90, 93, 96, 97, 96, 98, 101, 107, 108, 111, 110, 104, 106, 112, 115, 114, 119, 136, 147, 151, 163, 173, 192, 198, 223, 248, 255, 254, 252, 249, 254, 255, 255, 255, 253, 249, 249, 246, 248, 233, 222, 113, 42, 43, 34, 29, 24, 26, 27, 22, 20, 23, 31, 25, 24, 28, 22, 24, 24, 32, 65, 38, 25, 23, 28, 11, 27, 51, 100, 94, 73, 86, 82, 57, 45, 32, 43, 36, 39, 28, 29, 41, 47, 45, 54, 78, 99, 100, 120, 133, 141, 115, 107, 92, 32, 51, 62, 60, 78, 95, 108, 119, 112, 112, 110, 104, 90, 82, 52, 66, 87, 102, 106, 102, 102, 101, 99, 99, 100, 100, 102, 100, 92, 78, 77, 105, 109, 113, 130, 137, 139, 142, 140, 137, 137, 136, 138, 136, 134, 134, 133, 132, 134, 134, 134, 130, 132, 132, 129, 129, 131, 129, 128, 128, 127, 126, 125, 124, 126, 127, 124, 126, 127, 128, 130, 131, 132, 132, 129, 127, 115, 102, 92, 85, 81, 63, 49, 44, 51, 42, 35, 23, 16, 19, 12, 12, 19, 22, 27, 29, 15, 16, 18, 17, 18, 20, 15, 15, 15, 15, 15, 15, 16, 19, 18, 21, 18, 18, 16, 15, 14, 14, 14, 14, 14, 14, 14, 14, 13, 12, 11, 13, 10, 6, 16, 32, 57, 84, 88, 85, 82, 80, 78, 74, 70, 68, 70, 74, 78, 80, 82, 81, 74, 76, 84, 91, 91, 93, 90, 91, 94, 95, 94, 94, 94, 89, 91, 96, 99, 99, 100, 107, 106, 102, 102, 102, 104, 108, 117, 124, 135, 135, 150, 153, 163, 162, 171, 193, 221, 251, 255, 255, 255, 255, 255, 251, 252, 254, 255, 255, 255, 253, 249, 250, 235, 248, 197, 70, 49, 32, 30, 23, 18, 21, 18, 22, 20, 12, 24, 22, 23, 36, 80, 128, 42, 9, 120, 150, 124, 133, 132, 156, 50, 20, 67, 98, 93, 61, 61, 73, 44, 42, 64, 54, 44, 34, 34, 22, 8, 44, 60, 65, 66, 94, 95, 107, 126, 126, 121, 136, 118, 76, 105, 98, 112, 121, 123, 121, 129, 123, 120, 108, 109, 98, 93, 85, 98, 97, 100, 99, 99, 99, 98, 99, 100, 100, 105, 102, 96, 97, 104, 96, 96, 109, 106, 100, 112, 132, 132, 139, 138, 137, 138, 134, 138, 132, 134, 133, 132, 133, 133, 133, 129, 131, 131, 130, 131, 132, 130, 129, 129, 129, 127, 126, 126, 129, 128, 127, 128, 129, 130, 132, 132, 131, 132, 130, 136, 121, 116, 98, 91, 88, 100, 100, 58, 43, 46, 43, 31, 33, 34, 29, 18, 9, 13, 10, 8, 8, 17, 17, 19, 21, 23, 24, 17, 17, 17, 16, 15, 15, 14, 11, 13, 10, 12, 11, 13, 10, 9, 15, 14, 13, 14, 14, 14, 15, 15, 15, 13, 12, 11, 5, 13, 10, 27, 49, 78, 91, 90, 89, 87, 85, 86, 83, 76, 72, 71, 71, 72, 77, 80, 81, 87, 85, 89, 101, 96, 97, 92, 93, 94, 95, 94, 94, 94, 97, 97, 97, 98, 96, 97, 107, 110, 108, 110, 108, 108, 115, 134, 138, 150, 161, 171, 198, 204, 236, 253, 254, 249, 240, 250, 255, 252, 248, 254, 255, 255, 252, 255, 255, 254, 251, 248, 236, 240, 145, 52, 42, 24, 33, 21, 19, 23, 17, 14, 11, 23, 92, 120, 127, 120, 103, 104, 89, 87, 90, 90, 110, 102, 120, 114, 126, 143, 52, 108, 106, 98, 56, 42, 67, 42, 38, 64, 60, 64, 51, 47, 31, 16, 45, 80, 60, 62, 100, 110, 92, 121, 132, 132, 132, 132, 114, 136, 130, 130, 133, 135, 122, 137, 127, 119, 113, 112, 100, 99, 110, 100, 99, 97, 94, 94, 96, 96, 100, 101, 102, 102, 101, 101, 101, 100, 105, 99, 100, 104, 110, 101, 102, 119, 138, 139, 138, 138, 135, 136, 135, 134, 133, 132, 132, 132, 132, 128, 130, 130, 134, 134, 130, 129, 130, 130, 130, 129, 128, 127, 129, 127, 128, 128, 129, 130, 132, 133, 133, 136, 133, 136, 136, 126, 111, 100, 96, 89, 96, 99, 102, 61, 46, 52, 46, 34, 29, 28, 30, 23, 14, 9, 17, 14, 13, 20, 23, 23, 19, 19, 19, 17, 17, 17, 16, 13, 10, 9, 12, 11, 13, 10, 9, 15, 15, 14, 15, 15, 15, 17, 18, 16, 14, 13, 10, 8, 8, 28, 43, 69, 85, 92, 97, 93, 93, 91, 89, 85, 80, 76, 75, 73, 72, 73, 76, 76, 92, 88, 92, 106, 97, 97, 93, 95, 96, 96, 98, 98, 98, 101, 104, 103, 105, 104, 105, 110, 115, 116, 123, 127, 129, 135, 146, 152, 160, 190, 230, 252, 255, 255, 255, 249, 245, 238, 246, 248, 253, 253, 254, 253, 255, 252, 252, 252, 250, 249, 247, 219, 95, 45, 41, 31, 29, 24, 24, 24, 18, 15, 21, 79, 99, 114, 99, 87, 79, 63, 51, 39, 64, 47, 52, 78, 63, 94, 92, 110, 98, 127, 119, 128, 104, 52, 47, 57, 38, 39, 59, 68, 64, 51, 54, 52, 42, 25, 34, 38, 64, 108, 106, 81, 86, 129, 134, 130, 132, 133, 127, 113, 98, 100, 102, 114, 123, 111, 121, 116, 119, 126, 114, 111, 111, 104, 99, 91, 94, 96, 97, 100, 102, 105, 100, 99, 98, 96, 100, 109, 105, 95, 97, 101, 107, 101, 97, 137, 140, 137, 136, 138, 132, 137, 134, 133, 132, 132, 132, 132, 128, 130, 130, 131, 134, 132, 130, 130, 130, 130, 130, 129, 128, 128, 125, 127, 127, 128, 129, 130, 133, 135, 131, 135, 129, 135, 126, 126, 110, 97, 97, 102, 111, 108, 107, 107, 91, 61, 40, 41, 37, 29, 29, 30, 30, 25, 19, 15, 12, 14, 14, 19, 19, 19, 18, 18, 18, 18, 16, 14, 18, 17, 16, 15, 17, 16, 15, 16, 16, 16, 19, 19, 16, 14, 9, 6, 14, 44, 63, 86, 91, 95, 101, 96, 97, 94, 91, 88, 85, 82, 79, 77, 77, 76, 77, 75, 87, 86, 98, 100, 103, 97, 95, 96, 96, 96, 100, 102, 102, 107, 109, 111, 116, 116, 117, 113, 118, 125, 134, 151, 158, 158, 173, 206, 242, 253, 252, 247, 248, 249, 251, 252, 254, 254, 250, 249, 250, 252, 253, 254, 255, 251, 245, 247, 243, 243, 178, 67, 38, 31, 28, 26, 26, 26, 19, 18, 17, 12, 86, 100, 98, 91, 65, 56, 50, 56, 47, 47, 46, 24, 15, 66, 36, 80, 73, 82, 100, 117, 114, 123, 109, 79, 61, 38, 28, 46, 52, 60, 61, 59, 58, 49, 43, 31, 27, 31, 61, 106, 109, 95, 88, 125, 128, 130, 127, 113, 96, 69, 44, 43, 56, 85, 89, 94, 100, 112, 117, 122, 118, 113, 111, 108, 103, 94, 94, 97, 101, 100, 104, 103, 99, 99, 99, 98, 97, 103, 96, 100, 105, 105, 108, 110, 107, 138, 139, 139, 137, 136, 135, 134, 133, 132, 134, 135, 134, 133, 129, 128, 131, 132, 136, 134, 131, 128, 132, 127, 131, 132, 133, 128, 123, 125, 124, 127, 129, 129, 132, 130, 137, 135, 134, 134, 130, 128, 122, 110, 106, 101, 109, 113, 114, 113, 113, 111, 93, 64, 53, 50, 45, 36, 39, 29, 28, 27, 22, 19, 11, 21, 17, 16, 14, 15, 14, 15, 19, 19, 19, 20, 19, 18, 16, 15, 14, 13, 13, 12, 19, 16, 13, 13, 9, 18, 40, 63, 85, 89, 96, 101, 99, 97, 97, 95, 93, 91, 87, 85, 82, 79, 80, 78, 79, 80, 83, 89, 102, 103, 103, 100, 99, 102, 104, 104, 104, 104, 104, 112, 115, 118, 122, 124, 126, 120, 128, 135, 145, 158, 188, 223, 246, 255, 252, 247, 240, 237, 239, 242, 246, 251, 255, 255, 252, 251, 251, 253, 254, 254, 254, 250, 244, 239, 222, 119, 49, 31, 26, 19, 20, 23, 24, 22, 19, 21, 19, 11, 88, 82, 83, 66, 47, 45, 45, 40, 38, 39, 32, 27, 23, 52, 5, 71, 68, 79, 96, 107, 108, 121, 103, 92, 84, 44, 37, 35, 37, 42, 60, 51, 45, 43, 54, 52, 47, 54, 81, 106, 113, 114, 100, 114, 124, 113, 108, 92, 66, 29, 27, 32, 44, 67, 64, 59, 71, 82, 94, 108, 110, 125, 136, 125, 113, 105, 105, 103, 101, 101, 101, 101, 99, 99, 99, 99, 96, 103, 96, 108, 115, 117, 118, 118, 119, 138, 138, 137, 137, 136, 135, 134, 134, 134, 132, 133, 134, 135, 129, 132, 131, 130, 136, 134, 131, 127, 127, 126, 129, 130, 128, 129, 126, 127, 126, 124, 129, 134, 132, 132, 138, 134, 134, 135, 134, 137, 130, 116, 101, 99, 104, 111, 114, 116, 114, 113, 111, 119, 107, 83, 56, 55, 54, 39, 35, 29, 30, 25, 27, 33, 31, 24, 16, 16, 14, 13, 18, 18, 17, 15, 16, 17, 12, 11, 13, 10, 12, 12, 13, 11, 13, 14, 13, 23, 41, 46, 80, 96, 96, 99, 102, 101, 98, 98, 95, 95, 94, 90, 88, 86, 82, 80, 81, 81, 82, 83, 94, 108, 107, 104, 105, 101, 104, 106, 105, 105, 109, 112, 110, 114, 121, 126, 131, 133, 147, 145, 160, 182, 221, 253, 254, 252, 253, 251, 250, 246, 247, 245, 246, 248, 250, 253, 254, 254, 254, 254, 254, 254, 254, 254, 247, 244, 189, 75, 42, 37, 25, 21, 18, 20, 19, 16, 15, 18, 22, 21, 21, 91, 77, 56, 41, 40, 31, 14, 33, 35, 41, 43, 43, 44, 36, 23, 66, 78, 71, 94, 107, 111, 107, 95, 101, 95, 73, 66, 46, 38, 40, 45, 57, 71, 70, 92, 96, 101, 106, 107, 115, 107, 113, 107, 121, 116, 100, 98, 66, 40, 35, 27, 38, 45, 60, 57, 52, 50, 50, 55, 60, 88, 102, 143, 147, 143, 130, 118, 115, 112, 106, 101, 99, 98, 98, 98, 98, 97, 104, 96, 109, 117, 119, 122, 121, 121, 140, 139, 137, 137, 137, 136, 135, 135, 135, 133, 133, 134, 135, 130, 133, 132, 135, 133, 133, 133, 130, 126, 129, 127, 126, 129, 130, 129, 129, 127, 126, 133, 135, 130, 133, 132, 135, 136, 132, 136, 135, 128, 119, 108, 100, 102, 104, 108, 112, 110, 114, 117, 119, 114, 108, 103, 95, 68, 50, 54, 48, 49, 44, 33, 34, 32, 34, 33, 33, 30, 27, 24, 20, 18, 15, 13, 11, 19, 18, 17, 13, 13, 13, 13, 13, 10, 12, 21, 44, 49, 68, 87, 91, 97, 101, 102, 103, 101, 101, 98, 99, 97, 94, 92, 91, 88, 84, 81, 81, 80, 87, 100, 112, 110, 104, 109, 104, 106, 106, 106, 108, 112, 114, 110, 115, 123, 132, 145, 156, 183, 215, 248, 254, 249, 238, 235, 242, 245, 245, 255, 255, 255, 254, 254, 252, 250, 247, 246, 252, 255, 255, 255, 255, 254, 254, 239, 135, 48, 34, 25, 28, 19, 17, 22, 16, 12, 11, 13, 17, 22, 21, 23, 70, 55, 35, 48, 27, 7, 11, 41, 55, 58, 64, 45, 46, 24, 13, 54, 87, 80, 96, 113, 107, 98, 86, 105, 97, 97, 80, 66, 50, 74, 87, 95, 107, 97, 114, 121, 117, 111, 120, 108, 105, 109, 97, 112, 111, 112, 107, 98, 59, 29, 24, 43, 56, 50, 43, 33, 34, 44, 48, 32, 70, 105, 134, 151, 152, 150, 146, 136, 120, 113, 103, 97, 97, 98, 98, 98, 98, 104, 97, 139, 146, 146, 149, 147, 142, 143, 141, 139, 138, 137, 136, 136, 135, 134, 136, 135, 134, 133, 132, 132, 134, 136, 136, 135, 134, 137, 130, 130, 128, 128, 126, 129, 130, 129, 129, 129, 128, 134, 130, 132, 129, 131, 132, 133, 137, 133, 129, 125, 113, 102, 101, 95, 103, 106, 108, 116, 119, 108, 113, 109, 111, 112, 102, 115, 96, 64, 49, 47, 47, 31, 34, 32, 29, 29, 29, 27, 26, 26, 26, 20, 19, 18, 34, 33, 32, 29, 27, 23, 18, 21, 34, 46, 50, 67, 81, 89, 98, 103, 102, 102, 102, 105, 105, 102, 102, 101, 97, 94, 93, 92, 88, 84, 83, 82, 91, 108, 117, 111, 105, 98, 100, 105, 109, 117, 122, 126, 130, 142, 149, 154, 163, 177, 226, 254, 254, 254, 254, 254, 254, 254, 254, 254, 254, 254, 254, 254, 250, 251, 253, 255, 255, 255, 253, 254, 255, 248, 244, 234, 212, 79, 45, 34, 28, 25, 22, 26, 24, 20, 18, 18, 18, 18, 17, 16, 14, 55, 85, 82, 25, 55, 35, 25, 48, 53, 52, 41, 45, 37, 32, 39, 41, 65, 92, 107, 106, 122, 117, 107, 104, 111, 106, 83, 54, 47, 19, 32, 45, 79, 98, 124, 130, 123, 118, 117, 112, 95, 112, 106, 114, 109, 89, 115, 118, 111, 90, 48, 30, 45, 73, 66, 63, 59, 57, 48, 32, 45, 24, 75, 99, 115, 139, 147, 141, 141, 144, 138, 146, 129, 115, 112, 112, 109, 100, 102, 95, 142, 147, 150, 147, 148, 147, 145, 146, 143, 141, 141, 140, 138, 138, 137, 138, 137, 137, 140, 140, 136, 138, 138, 136, 134, 134, 138, 138, 134, 132, 133, 125, 133, 131, 129, 123, 129, 122, 128, 129, 130, 132, 133, 130, 136, 131, 133, 133, 130, 130, 119, 109, 102, 100, 102, 104, 111, 108, 117, 114, 118, 113, 121, 116, 120, 114, 105, 106, 103, 81, 64, 56, 60, 60, 58, 51, 41, 34, 31, 28, 20, 18, 22, 22, 19, 20, 16, 14, 14, 40, 60, 40, 49, 73, 86, 85, 89, 93, 95, 98, 100, 102, 101, 102, 103, 101, 103, 101, 96, 95, 92, 89, 84, 83, 81, 99, 114, 123, 117, 113, 109, 118, 122, 125, 128, 131, 136, 144, 142, 168, 217, 252, 255, 254, 254, 254, 254, 254, 254, 254, 254, 254, 254, 254, 254, 254, 254, 252, 252, 254, 255, 255, 255, 252, 254, 254, 245, 241, 151, 43, 32, 33, 25, 21, 21, 21, 24, 21, 19, 18, 18, 18, 18, 17, 16, 14, 35, 88, 78, 42, 49, 11, 32, 60, 48, 40, 35, 29, 29, 33, 42, 23, 45, 86, 123, 106, 131, 122, 107, 103, 107, 86, 57, 36, 32, 21, 9, 36, 52, 60, 83, 96, 110, 113, 108, 103, 109, 100, 93, 110, 101, 79, 121, 122, 121, 104, 69, 34, 38, 74, 69, 72, 61, 52, 64, 70, 51, 43, 46, 99, 99, 138, 157, 149, 143, 142, 148, 148, 148, 136, 130, 117, 105, 109, 115, 105, 141, 148, 147, 145, 146, 145, 146, 141, 140, 141, 141, 140, 139, 139, 138, 138, 139, 137, 138, 139, 139, 137, 137, 136, 136, 137, 139, 134, 129, 126, 129, 128, 129, 129, 129, 130, 127, 130, 128, 128, 129, 128, 132, 133, 136, 132, 134, 133, 135, 137, 129, 115, 107, 101, 97, 107, 113, 112, 112, 120, 123, 122, 119, 118, 114, 109, 106, 107, 111, 114, 112, 111, 101, 76, 49, 33, 39, 46, 50, 52, 52, 55, 52, 45, 44, 46, 44, 44, 39, 39, 34, 39, 68, 83, 84, 91, 89, 93, 93, 98, 98, 99, 101, 101, 102, 103, 102, 100, 98, 95, 93, 91, 88, 86, 85, 113, 125, 130, 126, 125, 125, 130, 138, 143, 145, 138, 149, 188, 224, 251, 255, 247, 249, 243, 254, 254, 254, 254, 254, 254, 254, 254, 254, 254, 254, 254, 254, 254, 254, 254, 254, 252, 252, 252, 241, 248, 233, 67, 35, 41, 31, 20, 25, 23, 21, 18, 20, 19, 17, 18, 18, 18, 18, 16, 15, 13, 30, 95, 96, 89, 54, 40, 31, 30, 26, 33, 40, 32, 32, 56, 56, 35, 67, 104, 112, 113, 121, 108, 101, 111, 79, 84, 75, 51, 23, 21, 21, 34, 36, 37, 50, 50, 54, 68, 89, 101, 105, 96, 87, 88, 112, 53, 115, 113, 110, 95, 48, 21, 27, 74, 69, 73, 60, 67, 65, 76, 75, 67, 35, 88, 99, 54, 98, 156, 142, 149, 145, 145, 148, 145, 146, 143, 134, 123, 125, 124, 141, 148, 145, 144, 145, 144, 141, 143, 142, 140, 141, 142, 140, 138, 140, 144, 140, 138, 138, 139, 141, 138, 137, 137, 138, 136, 136, 134, 134, 132, 131, 130, 128, 129, 131, 136, 129, 136, 130, 129, 129, 131, 137, 134, 134, 135, 136, 136, 135, 137, 132, 124, 114, 104, 103, 108, 115, 118, 117, 121, 114, 120, 114, 120, 124, 115, 114, 118, 121, 114, 112, 107, 103, 105, 108, 103, 94, 83, 73, 66, 51, 38, 31, 29, 31, 33, 30, 31, 30, 28, 47, 79, 88, 87, 93, 93, 90, 93, 93, 98, 98, 97, 100, 101, 101, 103, 102, 99, 99, 96, 95, 94, 92, 91, 89, 126, 137, 134, 136, 142, 145, 143, 142, 155, 168, 214, 245, 254, 245, 247, 247, 244, 237, 241, 254, 254, 254, 254, 254, 254, 254, 254, 254, 254, 254, 254, 254, 255, 255, 253, 250, 249, 247, 245, 238, 152, 43, 32, 27, 24, 23, 27, 18, 20, 17, 15, 20, 19, 18, 18, 18, 18, 18, 15, 14, 12, 85, 97, 103, 115, 102, 50, 48, 41, 47, 32, 24, 29, 36, 68, 83, 106, 104, 112, 108, 110, 118, 107, 94, 85, 69, 91, 102, 87, 41, 38, 28, 59, 59, 53, 38, 32, 51, 70, 73, 78, 102, 116, 122, 115, 110, 76, 88, 98, 106, 72, 35, 24, 12, 68, 72, 72, 62, 60, 86, 79, 72, 64, 86, 114, 101, 56, 19, 23, 64, 130, 143, 148, 146, 149, 145, 144, 146, 147, 136, 132, 144, 147, 147, 144, 145, 145, 142, 144, 143, 141, 142, 143, 142, 143, 140, 140, 140, 139, 141, 141, 139, 139, 139, 138, 137, 139, 138, 134, 133, 131, 132, 127, 132, 133, 134, 134, 137, 133, 133, 132, 131, 132, 134, 131, 134, 136, 135, 141, 143, 143, 139, 129, 120, 110, 105, 109, 112, 116, 115, 113, 117, 122, 116, 120, 123, 121, 121, 122, 115, 122, 115, 113, 113, 113, 109, 104, 102, 108, 111, 112, 110, 100, 94, 92, 93, 91, 89, 84, 85, 95, 94, 97, 97, 90, 92, 100, 94, 96, 95, 98, 99, 100, 99, 100, 101, 102, 103, 100, 97, 97, 96, 96, 94, 93, 91, 137, 144, 144, 148, 158, 169, 190, 226, 243, 252, 255, 255, 254, 251, 250, 249, 248, 247, 244, 254, 254, 254, 254, 254, 254, 254, 254, 254, 254, 253, 253, 253, 251, 253, 250, 240, 244, 242, 206, 87, 25, 24, 19, 19, 19, 23, 22, 19, 15, 15, 15, 19, 18, 18, 19, 18, 16, 15, 15, 16, 16, 112, 107, 105, 112, 105, 82, 66, 52, 65, 64, 51, 56, 70, 97, 106, 112, 101, 116, 100, 88, 102, 114, 103, 92, 80, 105, 105, 83, 39, 22, 50, 67, 87, 89, 81, 61, 59, 66, 70, 55, 90, 118, 128, 121, 115, 131, 112, 84, 102, 68, 29, 36, 4, 56, 69, 82, 81, 38, 78, 58, 85, 104, 137, 128, 106, 84, 11, 11, 13, 10, 20, 46, 93, 142, 148, 144, 144, 147, 144, 147, 150, 144, 144, 144, 144, 147, 146, 143, 142, 142, 143, 143, 143, 145, 141, 139, 142, 141, 142, 143, 141, 137, 140, 139, 139, 138, 135, 137, 139, 139, 139, 141, 139, 134, 132, 133, 133, 136, 134, 135, 135, 134, 131, 131, 132, 134, 135, 135, 139, 137, 142, 139, 136, 129, 117, 111, 113, 114, 117, 115, 115, 112, 119, 123, 119, 115, 116, 110, 112, 113, 112, 113, 112, 109, 113, 118, 119, 114, 119, 113, 111, 113, 115, 111, 105, 99, 99, 99, 99, 96, 95, 97, 101, 105, 102, 100, 94, 96, 98, 98, 98, 98, 101, 100, 100, 101, 101, 102, 101, 99, 97, 97, 96, 94, 94, 93, 140, 183, 191, 211, 231, 247, 253, 255, 254, 252, 250, 248, 247, 255, 254, 253, 251, 253, 254, 254, 254, 254, 254, 254, 254, 254, 254, 254, 254, 254, 255, 255, 249, 246, 246, 238, 232, 161, 47, 15, 21, 21, 16, 19, 20, 23, 21, 18, 16, 16, 16, 18, 18, 18, 18, 17, 15, 15, 17, 19, 19, 84, 112, 103, 96, 95, 86, 83, 81, 98, 75, 83, 84, 69, 88, 93, 94, 96, 103, 93, 88, 91, 107, 113, 102, 90, 101, 113, 85, 39, 26, 55, 73, 97, 116, 109, 98, 94, 70, 59, 52, 84, 120, 127, 132, 129, 127, 130, 96, 120, 68, 44, 43, 6, 43, 72, 82, 71, 43, 79, 97, 120, 117, 136, 132, 123, 112, 20, 12, 12, 12, 13, 10, 13, 10, 33, 66, 115, 149, 141, 141, 143, 149, 143, 144, 146, 147, 147, 147, 144, 144, 144, 144, 144, 145, 146, 142, 141, 142, 142, 143, 143, 142, 138, 141, 141, 141, 141, 138, 139, 140, 139, 140, 141, 139, 142, 140, 135, 136, 137, 136, 136, 136, 136, 135, 134, 134, 134, 135, 137, 138, 139, 144, 141, 139, 136, 123, 111, 111, 109, 115, 116, 120, 116, 121, 122, 112, 118, 119, 115, 115, 115, 119, 113, 115, 116, 112, 115, 118, 115, 112, 103, 103, 104, 104, 104, 106, 106, 98, 97, 98, 94, 100, 105, 100, 100, 97, 95, 97, 99, 97, 99, 102, 102, 100, 99, 101, 102, 101, 101, 101, 100, 98, 97, 97, 94, 93, 93, 134, 254, 254, 249, 252, 255, 249, 247, 251, 245, 248, 246, 246, 255, 254, 251, 251, 254, 255, 254, 254, 254, 254, 254, 254, 254, 254, 254, 254, 253, 252, 252, 242, 240, 232, 216, 104, 17, 18, 23, 14, 14, 17, 20, 20, 21, 19, 17, 16, 16, 16, 17, 17, 17, 15, 16, 16, 18, 21, 22, 21, 39, 94, 92, 85, 93, 91, 93, 69, 93, 85, 83, 83, 59, 48, 57, 62, 75, 70, 85, 88, 91, 99, 114, 108, 102, 69, 98, 82, 40, 29, 30, 59, 86, 92, 97, 99, 102, 77, 54, 57, 71, 122, 135, 137, 139, 129, 141, 127, 133, 102, 76, 43, 42, 55, 80, 71, 70, 89, 120, 131, 119, 120, 140, 122, 117, 102, 49, 15, 15, 13, 11, 13, 10, 5, 11, 12, 48, 93, 135, 143, 138, 145, 151, 148, 149, 149, 147, 147, 147, 147, 146, 145, 146, 147, 146, 145, 143, 143, 142, 143, 143, 141, 142, 143, 143, 143, 143, 142, 141, 141, 142, 141, 139, 139, 138, 136, 140, 138, 137, 137, 137, 137, 137, 137, 135, 135, 136, 137, 138, 141, 142, 140, 144, 137, 123, 117, 109, 110, 115, 117, 120, 119, 120, 120, 115, 123, 116, 109, 112, 111, 115, 114, 111, 108, 111, 119, 123, 119, 105, 104, 101, 102, 97, 98, 99, 104, 98, 104, 100, 97, 104, 110, 105, 99, 96, 92, 95, 101, 98, 101, 100, 102, 101, 97, 102, 102, 101, 101, 101, 101, 99, 98, 98, 94, 93, 93, 133, 232, 254, 250, 247, 249, 251, 247, 252, 250, 251, 251, 251, 253, 249, 246, 247, 252, 255, 254, 254, 254, 254, 254, 254, 254, 254, 254, 254, 253, 249, 245, 219, 217, 157, 51, 16, 21, 19, 23, 23, 22, 20, 19, 18, 17, 16, 15, 15, 15, 15, 16, 16, 16, 14, 15, 19, 22, 23, 23, 22, 21, 64, 80, 81, 99, 100, 96, 68, 63, 78, 86, 84, 62, 24, 23, 28, 64, 75, 52, 84, 97, 118, 128, 125, 114, 66, 96, 91, 45, 28, 26, 15, 47, 65, 66, 76, 76, 62, 64, 56, 46, 106, 131, 132, 135, 141, 140, 143, 157, 115, 106, 11, 63, 118, 114, 126, 133, 137, 137, 140, 133, 123, 145, 121, 105, 95, 61, 19, 18, 15, 7, 8, 12, 13, 10, 8, 13, 10, 12, 37, 82, 123, 149, 144, 142, 150, 151, 149, 148, 148, 148, 147, 146, 147, 149, 148, 147, 147, 145, 145, 144, 143, 143, 143, 144, 144, 144, 145, 144, 145, 146, 143, 142, 139, 143, 139, 140, 138, 138, 138, 136, 136, 136, 137, 138, 138, 137, 137, 138, 138, 139, 140, 139, 149, 135, 125, 123, 108, 104, 108, 117, 117, 117, 120, 122, 124, 121, 121, 121, 119, 118, 115, 120, 117, 111, 107, 113, 111, 106, 106, 109, 103, 105, 103, 102, 107, 107, 112, 109, 107, 107, 106, 109, 108, 110, 104, 95, 92, 100, 102, 102, 99, 101, 102, 99, 101, 102, 101, 101, 101, 101, 101, 100, 99, 97, 96, 94, 134, 207, 253, 248, 243, 247, 249, 254, 253, 251, 255, 255, 255, 250, 247, 244, 245, 250, 254, 254, 254, 254, 254, 253, 253, 252, 251, 251, 248, 230, 221, 215, 191, 108, 23, 18, 17, 19, 21, 26, 23, 27, 20, 16, 14, 15, 15, 14, 16, 15, 15, 16, 16, 15, 15, 17, 21, 24, 24, 23, 21, 24, 57, 79, 96, 99, 92, 83, 60, 54, 71, 75, 76, 73, 25, 22, 23, 70, 88, 50, 85, 100, 135, 130, 139, 130, 74, 102, 102, 66, 27, 27, 13, 10, 13, 10, 27, 35, 52, 60, 56, 58, 46, 52, 110, 122, 124, 111, 138, 140, 144, 149, 139, 118, 61, 133, 136, 140, 145, 146, 139, 138, 158, 138, 127, 147, 130, 108, 88, 85, 19, 16, 15, 13, 12, 7, 11, 15, 13, 11, 13, 12, 15, 56, 118, 147, 151, 150, 152, 150, 149, 149, 150, 149, 147, 151, 150, 147, 151, 148, 147, 146, 145, 145, 144, 143, 143, 142, 144, 143, 145, 145, 140, 137, 132, 135, 130, 124, 131, 137, 136, 133, 133, 132, 132, 135, 140, 140, 137, 137, 138, 138, 138, 139, 149, 136, 135, 139, 126, 112, 101, 111, 113, 112, 118, 118, 120, 117, 119, 119, 110, 114, 110, 110, 110, 111, 114, 117, 111, 105, 112, 108, 106, 106, 107, 104, 105, 108, 116, 111, 111, 109, 107, 103, 104, 110, 106, 98, 92, 99, 105, 104, 105, 102, 102, 101, 101, 102, 102, 101, 101, 101, 102, 101, 100, 100, 99, 96, 122, 179, 255, 246, 243, 254, 255, 255, 255, 255, 255, 255, 255, 252, 253, 255, 255, 255, 255, 255, 255, 255, 253, 249, 246, 240, 227, 217, 202, 193, 176, 133, 62, 13, 20, 13, 14, 14, 20, 21, 20, 19, 19, 16, 15, 17, 17, 17, 18, 18, 16, 13, 14, 15, 18, 19, 21, 22, 27, 24, 22, 34, 94, 83, 90, 84, 66, 60, 81, 78, 67, 67, 79, 71, 31, 46, 32, 83, 99, 87, 93, 114, 104, 119, 127, 121, 96, 141, 123, 123, 84, 51, 19, 37, 26, 42, 53, 60, 75, 57, 49, 113, 124, 120, 134, 128, 139, 141, 140, 158, 157, 148, 148, 146, 160, 131, 135, 128, 146, 128, 150, 140, 131, 135, 125, 103, 88, 84, 13, 8, 12, 11, 13, 13, 13, 13, 13, 13, 14, 14, 14, 12, 13, 10, 33, 90, 141, 158, 151, 154, 148, 139, 152, 159, 155, 152, 151, 154, 148, 149, 147, 151, 147, 145, 144, 143, 135, 136, 119, 123, 120, 109, 103, 88, 102, 107, 107, 115, 124, 115, 127, 124, 117, 121, 121, 130, 137, 133, 134, 140, 141, 142, 141, 147, 145, 147, 143, 129, 117, 109, 106, 110, 109, 108, 110, 114, 116, 117, 114, 114, 113, 112, 113, 114, 117, 120, 115, 107, 106, 113, 111, 110, 109, 107, 109, 110, 112, 119, 117, 112, 110, 103, 100, 100, 100, 99, 100, 98, 97, 98, 106, 107, 106, 106, 106, 105, 104, 103, 103, 103, 102, 103, 100, 102, 102, 100, 98, 110, 146, 255, 247, 244, 254, 255, 255, 255, 255, 255, 255, 255, 252, 252, 252, 255, 255, 255, 249, 249, 244, 241, 233, 223, 209, 198, 185, 166, 153, 95, 13, 16, 16, 12, 14, 16, 17, 19, 18, 17, 17, 15, 14, 13, 16, 16, 16, 15, 15, 15, 12, 14, 18, 19, 19, 21, 22, 26, 24, 21, 45, 89, 87, 81, 89, 83, 69, 103, 95, 75, 73, 78, 77, 40, 54, 37, 78, 107, 97, 90, 119, 108, 125, 134, 142, 89, 140, 140, 143, 136, 130, 83, 34, 32, 92, 69, 79, 92, 61, 86, 148, 132, 148, 161, 146, 140, 143, 145, 145, 148, 146, 143, 141, 142, 125, 111, 131, 140, 147, 150, 146, 135, 126, 123, 106, 73, 84, 15, 12, 13, 10, 11, 13, 13, 13, 13, 13, 13, 13, 13, 13, 8, 11, 13, 11, 16, 62, 119, 154, 148, 142, 145, 151, 149, 154, 154, 153, 155, 152, 150, 154, 151, 147, 143, 131, 115, 117, 123, 125, 124, 112, 100, 90, 68, 71, 76, 95, 101, 111, 110, 107, 107, 125, 126, 125, 122, 131, 136, 144, 145, 146, 142, 145, 148, 145, 141, 139, 120, 113, 114, 110, 117, 118, 119, 120, 117, 122, 125, 126, 123, 120, 122, 122, 117, 113, 113, 110, 107, 113, 113, 114, 111, 113, 115, 120, 118, 118, 112, 114, 114, 109, 111, 110, 107, 108, 104, 106, 101, 98, 96, 99, 100, 102, 107, 106, 106, 104, 104, 104, 103, 102, 102, 102, 103, 100, 99, 95, 127, 249, 249, 245, 253, 255, 255, 255, 255, 255, 255, 255, 252, 250, 249, 249, 247, 243, 243, 241, 229, 217, 202, 188, 172, 148, 134, 121, 60, 11, 8, 14, 12, 16, 16, 16, 16, 16, 15, 14, 14, 13, 13, 13, 15, 15, 15, 14, 15, 16, 17, 17, 17, 19, 19, 21, 22, 25, 23, 20, 76, 100, 96, 91, 107, 100, 58, 105, 104, 77, 76, 70, 77, 47, 38, 36, 61, 93, 96, 91, 118, 116, 124, 135, 147, 143, 141, 145, 147, 152, 138, 132, 100, 108, 47, 42, 141, 148, 130, 142, 144, 148, 147, 144, 150, 136, 140, 153, 143, 156, 157, 144, 137, 139, 130, 128, 145, 153, 148, 115, 139, 127, 131, 123, 111, 87, 88, 15, 11, 13, 11, 13, 13, 13, 13, 13, 13, 12, 12, 12, 12, 14, 13, 9, 9, 12, 14, 27, 78, 133, 149, 143, 143, 155, 155, 155, 157, 154, 153, 157, 155, 149, 134, 114, 104, 112, 111, 110, 120, 95, 86, 86, 46, 44, 54, 43, 79, 79, 95, 99, 108, 124, 123, 123, 124, 118, 134, 145, 149, 146, 140, 142, 146, 143, 143, 143, 131, 116, 112, 112, 120, 123, 118, 112, 115, 117, 117, 114, 114, 115, 118, 118, 117, 113, 113, 112, 110, 113, 113, 113, 112, 113, 111, 113, 114, 117, 120, 119, 116, 112, 115, 117, 116, 116, 114, 114, 110, 115, 110, 106, 106, 107, 107, 106, 105, 105, 105, 105, 104, 101, 103, 101, 103, 101, 100, 78, 120, 234, 252, 246, 251, 254, 254, 254, 254, 254, 254, 254, 250, 249, 247, 240, 233, 227, 218, 212, 196, 175, 153, 135, 124, 120, 111, 28, 11, 14, 14, 14, 13, 17, 19, 18, 15, 14, 13, 12, 12, 14, 14, 14, 15, 15, 15, 15, 16, 17, 17, 18, 19, 19, 19, 21, 22, 23, 22, 21, 92, 101, 102, 85, 107, 101, 81, 91, 102, 77, 73, 59, 65, 36, 16, 20, 58, 103, 96, 85, 116, 129, 125, 138, 145, 158, 151, 154, 148, 158, 157, 153, 148, 140, 138, 67, 146, 146, 141, 147, 144, 164, 151, 161, 151, 148, 147, 163, 155, 153, 156, 154, 143, 154, 139, 145, 146, 151, 133, 124, 135, 129, 134, 125, 107, 93, 83, 25, 13, 16, 11, 13, 13, 13, 13, 13, 13, 12, 12, 12, 13, 10, 13, 10, 8, 13, 10, 8, 7, 7, 9, 9, 23, 56, 127, 155, 152, 151, 156, 155, 154, 154, 157, 157, 149, 123, 115, 111, 109, 73, 97, 97, 38, 67, 89, 80, 74, 71, 4, 60, 58, 69, 75, 89, 107, 121, 123, 118, 105, 131, 143, 146, 144, 143, 144, 146, 144, 146, 141, 140, 125, 112, 115, 116, 121, 124, 123, 117, 119, 119, 120, 120, 119, 120, 116, 115, 116, 114, 113, 113, 112, 110, 108, 115, 120, 121, 123, 119, 116, 118, 114, 114, 118, 117, 115, 115, 116, 117, 114, 115, 113, 113, 110, 107, 107, 105, 104, 103, 104, 105, 105, 105, 101, 104, 101, 104, 102, 100, 74, 112, 213, 251, 247, 246, 252, 252, 250, 248, 249, 250, 250, 243, 242, 232, 222, 203, 188, 175, 150, 138, 127, 115, 120, 116, 75, 14, 21, 16, 16, 18, 16, 16, 16, 14, 14, 13, 15, 14, 13, 12, 12, 12, 12, 14, 14, 13, 16, 17, 18, 19, 20, 20, 21, 21, 21, 21, 20, 21, 20, 44, 105, 99, 78, 87, 89, 83, 80, 79, 71, 68, 59, 27, 14, 36, 26, 48, 115, 116, 97, 125, 141, 134, 140, 147, 154, 152, 151, 145, 145, 146, 149, 155, 146, 160, 141, 152, 143, 126, 144, 139, 152, 155, 159, 151, 150, 141, 161, 166, 158, 160, 137, 136, 142, 146, 149, 148, 153, 145, 134, 144, 131, 134, 122, 98, 96, 84, 52, 13, 10, 13, 10, 11, 13, 13, 13, 13, 13, 13, 13, 13, 13, 11, 13, 10, 7, 9, 15, 13, 16, 11, 18, 16, 35, 45, 76, 93, 140, 149, 151, 154, 154, 160, 151, 125, 84, 112, 117, 115, 60, 103, 94, 87, 65, 69, 66, 70, 66, 32, 43, 58, 73, 76, 59, 67, 94, 112, 117, 108, 131, 138, 145, 151, 146, 145, 148, 148, 152, 146, 145, 136, 123, 115, 114, 119, 122, 127, 124, 130, 130, 131, 128, 126, 125, 130, 122, 117, 116, 116, 115, 115, 117, 119, 120, 120, 119, 124, 120, 120, 120, 115, 116, 118, 118, 118, 118, 118, 118, 120, 115, 113, 116, 115, 112, 113, 109, 108, 107, 105, 108, 103, 106, 103, 102, 104, 104, 104, 104, 63, 99, 162, 254, 247, 246, 247, 243, 238, 236, 234, 232, 234, 225, 216, 197, 179, 156, 136, 122, 117, 118, 115, 119, 120, 40, 9, 16, 13, 10, 16, 17, 21, 19, 17, 15, 14, 14, 13, 14, 13, 13, 14, 12, 12, 12, 13, 13, 13, 17, 17, 18, 18, 19, 20, 21, 21, 21, 20, 20, 21, 22, 20, 98, 102, 76, 50, 73, 81, 66, 71, 63, 60, 30, 24, 41, 38, 57, 92, 127, 128, 132, 135, 146, 145, 138, 151, 152, 146, 145, 142, 138, 143, 149, 156, 156, 155, 148, 147, 143, 136, 123, 157, 153, 162, 157, 159, 151, 123, 155, 165, 155, 167, 148, 139, 145, 147, 148, 145, 145, 144, 144, 134, 122, 131, 117, 80, 90, 90, 77, 54, 12, 11, 13, 13, 13, 13, 13, 13, 13, 13, 13, 15, 12, 7, 5, 107, 64, 30, 49, 78, 76, 117, 123, 115, 95, 99, 109, 114, 141, 132, 134, 148, 99, 59, 100, 118, 113, 47, 116, 95, 84, 55, 39, 30, 32, 25, 25, 25, 45, 69, 66, 55, 89, 87, 101, 104, 106, 132, 145, 146, 146, 147, 147, 147, 146, 148, 145, 145, 142, 128, 117, 113, 118, 123, 124, 125, 125, 127, 129, 129, 128, 127, 129, 128, 129, 126, 124, 121, 123, 126, 123, 123, 122, 121, 123, 120, 119, 118, 118, 117, 118, 118, 118, 118, 118, 119, 117, 117, 115, 114, 115, 113, 113, 110, 109, 108, 106, 107, 104, 105, 104, 103, 104, 104, 104, 104, 58, 88, 123, 255, 246, 245, 233, 224, 217, 215, 215, 211, 202, 189, 168, 144, 126, 122, 123, 115, 114, 111, 120, 87, 19, 13, 16, 11, 16, 19, 20, 22, 17, 15, 13, 14, 13, 12, 11, 16, 16, 11, 11, 11, 11, 12, 13, 15, 17, 18, 19, 18, 18, 19, 20, 20, 20, 19, 19, 21, 22, 38, 111, 107, 102, 81, 69, 81, 71, 47, 48, 52, 38, 43, 31, 78, 123, 130, 131, 135, 132, 140, 147, 146, 134, 137, 157, 145, 143, 139, 136, 142, 149, 157, 155, 155, 143, 140, 145, 142, 123, 151, 158, 168, 159, 156, 149, 118, 146, 172, 165, 159, 158, 159, 136, 146, 138, 142, 134, 137, 141, 123, 117, 124, 116, 85, 90, 91, 86, 104, 17, 11, 13, 13, 13, 13, 13, 13, 13, 13, 13, 14, 14, 11, 4, 71, 110, 113, 113, 117, 105, 104, 93, 78, 60, 63, 40, 103, 109, 109, 111, 133, 119, 84, 97, 117, 108, 89, 101, 94, 77, 51, 54, 29, 26, 34, 34, 44, 33, 29, 39, 66, 95, 99, 100, 112, 106, 134, 142, 145, 145, 145, 147, 145, 145, 143, 145, 145, 145, 135, 124, 114, 117, 122, 122, 125, 127, 123, 127, 129, 131, 133, 129, 130, 129, 129, 129, 129, 126, 126, 129, 123, 123, 122, 123, 124, 122, 120, 122, 120, 119, 119, 119, 119, 118, 120, 117, 118, 116, 114, 115, 115, 113, 111, 111, 110, 109, 106, 107, 105, 104, 105, 104, 104, 104, 104, 54, 82, 115, 249, 247, 224, 201, 194, 185, 178, 171, 161, 150, 131, 117, 112, 117, 118, 117, 119, 115, 111, 51, 3, 15, 14, 16, 13, 21, 19, 20, 17, 14, 14, 14, 15, 14, 13, 16, 14, 13, 12, 13, 10, 13, 10, 13, 10, 13, 16, 17, 18, 19, 20, 17, 18, 19, 19, 19, 19, 19, 18, 21, 22, 34, 114, 117, 123, 117, 104, 99, 65, 53, 52, 40, 60, 74, 57, 139, 140, 136, 133, 126, 141, 147, 144, 146, 132, 116, 150, 145, 142, 134, 134, 142, 151, 158, 158, 158, 150, 155, 148, 144, 154, 141, 159, 157, 159, 154, 140, 129, 139, 157, 163, 163, 155, 154, 142, 138, 132, 132, 123, 127, 132, 140, 135, 139, 124, 96, 83, 104, 88, 107, 62, 11, 13, 13, 13, 13, 13, 13, 13, 13, 13, 18, 12, 14, 64, 103, 108, 91, 78, 79, 70, 45, 19, 81, 92, 91, 12, 36, 52, 104, 102, 116, 118, 105, 131, 123, 123, 120, 97, 92, 69, 56, 43, 45, 47, 57, 44, 50, 41, 21, 21, 62, 94, 75, 74, 103, 105, 128, 139, 142, 147, 143, 145, 144, 146, 145, 150, 151, 150, 147, 137, 119, 116, 118, 123, 126, 126, 126, 125, 129, 134, 133, 130, 133, 130, 130, 129, 128, 127, 126, 126, 125, 125, 123, 124, 126, 124, 123, 123, 122, 120, 120, 120, 120, 120, 120, 121, 117, 118, 116, 115, 116, 113, 113, 112, 111, 112, 108, 111, 105, 105, 106, 104, 104, 104, 104, 69, 70, 79, 187, 206, 177, 164, 159, 148, 141, 129, 122, 125, 128, 124, 116, 113, 116, 119, 99, 89, 13, 14, 13, 13, 10, 7, 22, 23, 21, 20, 13, 12, 8, 6, 2, 2, 13, 10, 23, 40, 14, 23, 14, 13, 10, 6, 9, 12, 14, 16, 17, 18, 19, 17, 18, 19, 20, 20, 20, 19, 22, 16, 16, 30, 106, 122, 144, 139, 129, 121, 117, 88, 88, 26, 112, 118, 109, 144, 138, 128, 138, 129, 139, 138, 132, 148, 145, 124, 148, 156, 144, 131, 147, 145, 147, 152, 156, 158, 178, 148, 111, 49, 145, 135, 165, 150, 152, 161, 142, 144, 147, 147, 151, 156, 161, 142, 134, 131, 126, 136, 107, 114, 134, 137, 140, 144, 136, 130, 104, 92, 78, 105, 31, 19, 11, 8, 14, 15, 14, 39, 20, 14, 2, 21, 4, 73, 106, 121, 97, 7, 44, 9, 17, 5, 33, 81, 78, 88, 70, 1, 21, 58, 107, 117, 143, 149, 137, 118, 121, 90, 63, 56, 59, 70, 29, 43, 19, 30, 21, 34, 51, 35, 63, 86, 64, 85, 97, 88, 97, 129, 131, 135, 139, 147, 150, 154, 156, 152, 153, 155, 154, 146, 136, 119, 116, 119, 121, 132, 130, 128, 133, 139, 135, 133, 137, 131, 130, 129, 129, 128, 127, 130, 126, 127, 127, 123, 126, 125, 127, 126, 126, 122, 122, 122, 122, 121, 121, 121, 120, 119, 120, 119, 120, 121, 117, 116, 115, 116, 113, 110, 110, 110, 110, 111, 107, 107, 107, 62, 66, 74, 118, 163, 134, 129, 130, 125, 116, 117, 116, 112, 120, 120, 120, 114, 116, 113, 53, 6, 16, 15, 13, 11, 14, 22, 19, 16, 13, 10, 8, 8, 12, 14, 28, 34, 40, 49, 52, 30, 14, 18, 13, 10, 7, 13, 10, 12, 14, 15, 17, 17, 18, 17, 17, 18, 20, 20, 20, 20, 18, 19, 14, 98, 112, 119, 145, 151, 136, 121, 117, 99, 110, 112, 129, 132, 93, 145, 148, 125, 161, 150, 131, 121, 136, 146, 148, 117, 142, 143, 149, 146, 147, 143, 147, 144, 149, 152, 162, 156, 140, 129, 151, 148, 161, 166, 165, 153, 149, 142, 130, 155, 156, 157, 151, 150, 82, 139, 115, 125, 119, 133, 138, 138, 141, 138, 137, 137, 116, 103, 104, 67, 19, 17, 1, 40, 96, 115, 121, 140, 96, 99, 51, 15, 13, 5, 100, 108, 97, 30, 43, 31, 26, 32, 42, 89, 96, 90, 94, 55, 12, 23, 1, 90, 114, 140, 151, 123, 111, 118, 97, 87, 65, 54, 62, 56, 69, 53, 54, 47, 44, 48, 62, 43, 52, 76, 96, 115, 86, 92, 123, 135, 141, 140, 144, 152, 154, 153, 158, 157, 159, 155, 148, 147, 132, 116, 124, 127, 126, 131, 134, 136, 137, 136, 138, 134, 132, 132, 131, 130, 129, 129, 131, 129, 127, 126, 124, 127, 126, 126, 125, 124, 124, 124, 122, 121, 121, 121, 121, 121, 120, 121, 119, 119, 118, 117, 117, 116, 113, 113, 113, 112, 112, 110, 107, 107, 107, 107, 55, 60, 68, 84, 127, 124, 126, 123, 118, 117, 118, 117, 118, 115, 114, 117, 120, 98, 27, 15, 21, 20, 21, 24, 21, 18, 9, 11, 11, 18, 32, 51, 43, 38, 27, 25, 24, 22, 32, 38, 13, 19, 9, 7, 11, 11, 13, 15, 16, 17, 18, 16, 17, 17, 19, 19, 19, 19, 16, 20, 14, 124, 112, 122, 140, 150, 147, 124, 119, 109, 102, 129, 127, 141, 147, 145, 153, 143, 160, 151, 141, 101, 139, 141, 142, 117, 157, 141, 148, 145, 148, 151, 140, 138, 138, 138, 146, 150, 140, 149, 153, 147, 162, 166, 166, 164, 153, 138, 138, 154, 157, 154, 162, 169, 139, 149, 141, 144, 129, 137, 131, 132, 142, 134, 138, 140, 126, 106, 93, 16, 14, 49, 84, 118, 115, 106, 119, 118, 113, 113, 113, 46, 9, 7, 101, 105, 90, 46, 44, 40, 23, 23, 34, 67, 96, 88, 81, 71, 77, 73, 13, 56, 95, 117, 131, 112, 102, 113, 120, 128, 102, 106, 89, 97, 104, 86, 91, 83, 76, 96, 101, 91, 102, 109, 111, 123, 101, 97, 114, 139, 143, 149, 144, 151, 153, 158, 157, 159, 159, 159, 156, 151, 145, 126, 119, 124, 128, 133, 139, 137, 136, 137, 140, 134, 135, 134, 133, 132, 131, 132, 131, 132, 129, 127, 128, 127, 127, 126, 125, 124, 126, 125, 123, 122, 122, 122, 122, 121, 120, 122, 120, 119, 118, 118, 117, 117, 113, 113, 114, 112, 111, 111, 110, 108, 108, 108, 46, 54, 63, 80, 118, 132, 122, 116, 114, 117, 119, 118, 117, 120, 120, 123, 71, 15, 9, 19, 14, 24, 17, 19, 14, 20, 24, 46, 57, 58, 57, 43, 23, 14, 23, 27, 31, 35, 48, 31, 6, 18, 8, 7, 12, 13, 10, 13, 14, 15, 16, 17, 15, 16, 17, 18, 18, 18, 18, 20, 17, 15, 35, 62, 112, 130, 131, 133, 125, 126, 128, 127, 124, 112, 142, 144, 145, 156, 145, 146, 145, 144, 133, 139, 135, 137, 129, 157, 135, 147, 142, 147, 156, 139, 136, 137, 143, 145, 149, 134, 145, 151, 147, 144, 160, 163, 156, 154, 138, 98, 126, 152, 159, 157, 158, 159, 157, 153, 145, 132, 132, 138, 140, 141, 138, 141, 140, 127, 96, 87, 3, 61, 93, 92, 90, 77, 79, 71, 78, 93, 104, 108, 94, 24, 25, 107, 103, 112, 90, 62, 56, 46, 43, 59, 50, 70, 76, 81, 46, 53, 70, 84, 80, 35, 79, 104, 122, 105, 107, 127, 126, 121, 122, 122, 125, 120, 124, 116, 113, 111, 114, 122, 118, 125, 124, 115, 118, 115, 99, 119, 133, 145, 146, 144, 147, 152, 157, 156, 158, 158, 160, 159, 155, 150, 137, 122, 120, 127, 132, 135, 136, 138, 139, 139, 138, 137, 136, 135, 134, 133, 133, 131, 131, 131, 129, 130, 127, 128, 128, 127, 126, 126, 126, 125, 124, 123, 123, 123, 122, 121, 122, 121, 121, 121, 119, 118, 117, 117, 113, 112, 114, 112, 112, 112, 109, 109, 109, 46, 52, 59, 72, 122, 125, 118, 121, 120, 124, 128, 128, 123, 116, 106, 43, 15, 14, 7, 12, 12, 5, 5, 9, 32, 58, 62, 61, 51, 32, 17, 14, 18, 28, 41, 54, 52, 45, 37, 35, 8, 9, 6, 8, 13, 13, 10, 12, 14, 15, 14, 17, 16, 16, 17, 17, 17, 17, 17, 19, 17, 15, 14, 32, 101, 121, 129, 140, 141, 129, 131, 138, 130, 103, 136, 144, 142, 151, 148, 143, 138, 150, 145, 146, 142, 142, 140, 152, 141, 150, 146, 152, 157, 149, 147, 143, 147, 149, 149, 144, 144, 147, 165, 159, 169, 162, 145, 154, 138, 98, 106, 144, 157, 152, 161, 158, 154, 151, 151, 147, 141, 148, 143, 139, 137, 136, 133, 121, 96, 92, 56, 83, 100, 94, 57, 32, 65, 46, 41, 58, 83, 104, 101, 93, 25, 96, 101, 128, 103, 83, 58, 58, 62, 50, 34, 34, 36, 41, 13, 15, 34, 74, 108, 52, 19, 66, 128, 124, 112, 118, 122, 127, 136, 123, 121, 128, 125, 123, 115, 103, 117, 124, 129, 134, 133, 114, 103, 111, 100, 131, 130, 130, 142, 139, 146, 147, 153, 158, 157, 159, 159, 162, 162, 154, 146, 134, 123, 122, 128, 131, 137, 139, 140, 139, 141, 138, 140, 140, 137, 136, 136, 134, 132, 132, 132, 133, 130, 129, 127, 130, 129, 126, 126, 126, 126, 125, 124, 123, 121, 121, 121, 123, 122, 122, 119, 118, 117, 119, 114, 113, 116, 114, 111, 110, 111, 110, 109, 45, 50, 58, 71, 117, 121, 119, 119, 117, 124, 121, 128, 121, 77, 23, 17, 15, 9, 4, 4, 8, 11, 12, 19, 41, 49, 37, 25, 18, 14, 18, 24, 34, 40, 43, 34, 30, 25, 23, 32, 4, 7, 5, 7, 13, 13, 10, 12, 13, 15, 13, 16, 17, 17, 17, 17, 17, 17, 17, 19, 18, 16, 18, 11, 56, 104, 122, 137, 135, 136, 134, 132, 137, 108, 97, 144, 148, 145, 144, 143, 142, 154, 150, 146, 143, 140, 130, 151, 157, 160, 155, 161, 161, 160, 149, 146, 145, 144, 145, 150, 141, 146, 162, 161, 161, 152, 141, 152, 122, 84, 83, 149, 153, 152, 156, 150, 148, 133, 140, 148, 136, 135, 135, 137, 131, 135, 106, 103, 106, 93, 78, 88, 69, 83, 46, 31, 48, 26, 36, 57, 83, 111, 110, 125, 74, 84, 98, 114, 109, 93, 60, 38, 42, 30, 26, 39, 35, 27, 35, 34, 26, 35, 62, 73, 12, 62, 121, 122, 117, 86, 140, 129, 131, 124, 129, 133, 135, 130, 123, 116, 111, 124, 131, 133, 118, 104, 87, 106, 112, 133, 128, 133, 142, 130, 139, 149, 154, 158, 160, 163, 163, 162, 159, 158, 152, 143, 127, 120, 125, 129, 138, 138, 139, 139, 139, 140, 142, 142, 140, 139, 137, 135, 132, 132, 132, 133, 133, 131, 128, 131, 129, 127, 127, 127, 126, 126, 126, 124, 122, 121, 121, 123, 121, 120, 119, 119, 118, 117, 116, 115, 115, 114, 113, 111, 112, 111, 110, 46, 47, 54, 67, 111, 118, 116, 115, 118, 119, 125, 118, 56, 8, 13, 10, 13, 15, 13, 10, 24, 29, 29, 25, 19, 16, 16, 12, 16, 17, 22, 20, 20, 21, 25, 29, 30, 36, 32, 33, 22, 25, 8, 9, 5, 8, 14, 13, 10, 11, 12, 15, 14, 16, 16, 16, 16, 17, 17, 17, 18, 19, 18, 17, 15, 20, 23, 87, 120, 137, 132, 132, 131, 144, 136, 131, 106, 120, 146, 149, 141, 147, 152, 148, 151, 143, 144, 152, 142, 152, 153, 156, 149, 154, 153, 154, 148, 147, 142, 152, 157, 160, 168, 171, 168, 158, 155, 153, 147, 156, 120, 33, 42, 128, 142, 144, 139, 134, 145, 121, 124, 134, 130, 123, 124, 132, 140, 98, 65, 106, 71, 81, 71, 57, 56, 77, 57, 36, 28, 24, 38, 64, 94, 114, 128, 130, 116, 46, 103, 120, 115, 108, 87, 61, 39, 32, 57, 70, 70, 56, 62, 70, 75, 54, 54, 60, 68, 108, 133, 139, 130, 109, 116, 112, 123, 130, 137, 135, 132, 137, 114, 115, 115, 107, 116, 119, 106, 90, 62, 83, 95, 120, 121, 134, 136, 127, 115, 146, 155, 158, 161, 162, 162, 163, 162, 163, 156, 150, 135, 122, 125, 127, 136, 138, 138, 138, 138, 140, 141, 141, 141, 139, 137, 136, 134, 133, 133, 131, 133, 132, 129, 130, 129, 128, 128, 128, 127, 127, 126, 124, 125, 123, 120, 121, 120, 119, 120, 119, 118, 117, 118, 117, 114, 115, 114, 112, 113, 112, 111, 48, 49, 52, 80, 107, 114, 110, 112, 119, 117, 96, 23, 5, 13, 10, 17, 21, 16, 8, 31, 24, 21, 12, 13, 13, 10, 14, 16, 19, 22, 21, 21, 19, 23, 21, 24, 27, 31, 29, 32, 19, 32, 25, 6, 5, 8, 15, 13, 10, 13, 10, 11, 14, 15, 16, 15, 15, 15, 16, 17, 17, 18, 21, 19, 17, 14, 17, 13, 45, 95, 118, 124, 132, 131, 138, 138, 139, 116, 90, 130, 145, 143, 148, 146, 125, 149, 146, 141, 148, 153, 144, 138, 147, 156, 158, 157, 155, 147, 146, 146, 149, 150, 152, 158, 169, 165, 164, 151, 155, 162, 159, 133, 12, 22, 69, 113, 124, 130, 112, 124, 124, 116, 117, 119, 118, 88, 98, 113, 88, 101, 103, 69, 76, 95, 56, 56, 96, 49, 38, 43, 47, 37, 71, 105, 110, 128, 146, 119, 26, 85, 110, 126, 127, 114, 112, 90, 61, 73, 67, 73, 106, 84, 101, 88, 90, 108, 95, 105, 117, 126, 134, 146, 125, 116, 112, 136, 133, 133, 120, 118, 124, 115, 84, 97, 95, 88, 43, 89, 100, 90, 89, 83, 106, 111, 120, 116, 107, 106, 145, 153, 158, 160, 164, 164, 161, 161, 165, 159, 155, 144, 130, 125, 125, 135, 137, 139, 139, 139, 141, 141, 141, 142, 140, 138, 137, 137, 135, 134, 132, 133, 131, 131, 129, 128, 128, 129, 129, 128, 128, 127, 125, 125, 124, 123, 121, 121, 120, 121, 120, 119, 118, 118, 117, 116, 115, 115, 114, 113, 112, 112, 45, 52, 56, 100, 102, 110, 113, 115, 117, 85, 13, 10, 18, 15, 19, 13, 10, 19, 17, 7, 33, 24, 22, 13, 8, 11, 21, 22, 27, 26, 24, 26, 32, 32, 17, 19, 21, 22, 32, 42, 21, 42, 37, 3, 5, 9, 15, 9, 9, 9, 14, 15, 15, 15, 15, 15, 16, 17, 17, 18, 21, 19, 17, 20, 11, 19, 18, 77, 106, 124, 120, 133, 139, 139, 132, 123, 122, 150, 147, 145, 144, 133, 124, 157, 150, 146, 136, 158, 155, 132, 136, 154, 157, 158, 151, 145, 145, 150, 151, 150, 156, 155, 170, 169, 161, 164, 165, 157, 151, 133, 54, 16, 9, 61, 69, 92, 42, 34, 40, 15, 25, 20, 32, 21, 64, 109, 108, 98, 111, 112, 116, 102, 64, 81, 112, 33, 60, 69, 60, 70, 76, 110, 129, 108, 128, 128, 88, 65, 99, 118, 138, 133, 134, 122, 101, 106, 119, 122, 145, 131, 151, 136, 134, 158, 138, 129, 128, 112, 129, 140, 149, 135, 105, 131, 132, 104, 86, 80, 102, 97, 74, 103, 95, 90, 13, 10, 76, 87, 96, 104, 98, 105, 105, 102, 112, 107, 121, 132, 151, 156, 159, 160, 160, 164, 166, 166, 160, 157, 150, 137, 126, 124, 134, 136, 140, 140, 140, 142, 140, 140, 142, 140, 139, 137, 138, 136, 134, 134, 133, 129, 132, 129, 127, 128, 129, 129, 128, 128, 128, 125, 125, 125, 126, 122, 122, 122, 121, 120, 119, 120, 118, 117, 118, 115, 115, 115, 114, 113, 112, 52, 43, 75, 95, 99, 92, 72, 55, 43, 13, 10, 21, 15, 4, 7, 13, 16, 15, 21, 18, 15, 13, 15, 18, 23, 24, 23, 25, 24, 35, 37, 29, 35, 32, 29, 28, 27, 28, 34, 38, 24, 8, 15, 24, 30, 14, 25, 36, 50, 45, 6, 8, 14, 14, 17, 17, 15, 15, 17, 17, 18, 17, 17, 17, 19, 54, 88, 103, 101, 116, 139, 128, 115, 121, 146, 155, 153, 145, 153, 142, 163, 155, 157, 153, 135, 156, 125, 119, 144, 157, 154, 155, 140, 83, 133, 142, 146, 145, 150, 151, 171, 173, 166, 158, 157, 151, 151, 131, 107, 14, 18, 25, 26, 20, 20, 23, 27, 32, 34, 36, 32, 88, 111, 103, 94, 78, 72, 103, 119, 109, 66, 89, 114, 64, 47, 67, 70, 65, 49, 87, 106, 109, 129, 131, 80, 53, 66, 117, 134, 142, 135, 132, 128, 128, 107, 105, 105, 126, 138, 145, 131, 127, 126, 126, 145, 127, 129, 134, 142, 134, 103, 140, 130, 112, 91, 97, 114, 120, 98, 65, 93, 92, 35, 52, 67, 93, 102, 105, 97, 105, 119, 114, 114, 118, 127, 129, 160, 164, 161, 160, 164, 165, 168, 161, 160, 155, 145, 132, 126, 129, 135, 138, 139, 142, 140, 141, 141, 141, 140, 140, 141, 138, 137, 136, 135, 134, 130, 132, 131, 131, 128, 129, 129, 127, 128, 128, 128, 127, 128, 128, 126, 127, 125, 120, 120, 120, 120, 117, 117, 120, 118, 118, 118, 116, 114, 112, 42, 52, 73, 62, 41, 27, 24, 16, 20, 13, 15, 12, 2, 8, 13, 16, 15, 2, 18, 20, 26, 30, 30, 27, 27, 24, 23, 29, 33, 34, 24, 25, 26, 25, 26, 22, 15, 18, 23, 26, 23, 23, 32, 30, 28, 19, 21, 31, 48, 66, 53, 27, 6, 11, 17, 17, 16, 15, 17, 18, 19, 18, 18, 18, 19, 23, 74, 91, 102, 123, 141, 134, 108, 83, 140, 135, 143, 149, 145, 153, 153, 153, 153, 154, 133, 149, 121, 87, 132, 147, 145, 158, 126, 59, 120, 131, 132, 132, 152, 158, 172, 162, 159, 158, 160, 137, 133, 132, 53, 19, 18, 26, 24, 25, 27, 26, 27, 31, 32, 37, 28, 129, 122, 123, 88, 86, 56, 64, 102, 92, 80, 100, 100, 67, 30, 33, 70, 60, 79, 72, 115, 126, 140, 142, 113, 83, 47, 112, 136, 141, 139, 139, 138, 138, 132, 114, 106, 115, 124, 141, 135, 134, 142, 138, 133, 133, 132, 127, 134, 118, 95, 128, 144, 135, 114, 117, 121, 141, 110, 36, 74, 70, 63, 38, 36, 72, 78, 51, 89, 72, 47, 114, 104, 108, 117, 106, 152, 159, 160, 160, 164, 167, 166, 165, 165, 161, 154, 142, 133, 129, 136, 139, 144, 140, 139, 140, 142, 143, 139, 138, 141, 138, 138, 137, 137, 132, 132, 133, 132, 131, 128, 128, 128, 127, 127, 127, 127, 127, 129, 129, 127, 128, 125, 122, 122, 122, 120, 121, 121, 118, 117, 117, 117, 117, 115, 114, 25, 39, 30, 22, 23, 23, 27, 19, 24, 6, 14, 14, 6, 13, 16, 18, 16, 4, 20, 32, 30, 24, 25, 26, 25, 24, 27, 28, 33, 27, 28, 20, 26, 21, 22, 23, 17, 19, 19, 19, 15, 13, 10, 13, 10, 9, 9, 18, 21, 29, 43, 44, 41, 57, 7, 7, 13, 15, 13, 13, 15, 16, 17, 18, 18, 18, 18, 6, 55, 107, 119, 138, 143, 145, 157, 132, 135, 66, 138, 140, 128, 147, 143, 147, 153, 137, 140, 126, 89, 71, 62, 149, 139, 156, 120, 49, 51, 106, 133, 108, 140, 142, 143, 148, 158, 157, 158, 150, 135, 101, 22, 20, 21, 26, 31, 28, 30, 32, 32, 35, 39, 34, 36, 133, 124, 113, 112, 112, 95, 60, 44, 39, 46, 103, 101, 41, 19, 22, 37, 48, 75, 93, 136, 140, 147, 152, 135, 98, 51, 112, 129, 131, 126, 124, 138, 135, 149, 128, 119, 128, 128, 138, 143, 129, 137, 135, 137, 138, 133, 130, 124, 108, 77, 125, 147, 133, 137, 129, 121, 140, 110, 68, 50, 53, 44, 32, 30, 30, 58, 50, 43, 38, 27, 87, 102, 104, 115, 126, 152, 153, 157, 161, 163, 160, 162, 167, 166, 161, 158, 150, 134, 129, 136, 138, 143, 142, 140, 140, 142, 142, 141, 143, 139, 139, 138, 138, 137, 133, 133, 133, 133, 132, 130, 129, 129, 129, 128, 128, 128, 128, 127, 125, 127, 127, 125, 124, 124, 124, 121, 122, 122, 119, 118, 118, 118, 118, 117, 115, 15, 20, 19, 22, 16, 12, 19, 24, 19, 13, 10, 13, 16, 8, 16, 18, 18, 13, 7, 15, 20, 21, 25, 27, 27, 25, 25, 30, 37, 46, 36, 30, 25, 23, 28, 23, 22, 19, 20, 14, 17, 18, 14, 9, 7, 6, 19, 22, 23, 27, 38, 36, 49, 32, 2, 9, 12, 11, 13, 10, 12, 13, 14, 15, 15, 15, 18, 14, 29, 88, 128, 138, 118, 141, 146, 147, 123, 112, 116, 130, 140, 140, 123, 124, 140, 122, 126, 57, 36, 28, 13, 85, 125, 153, 145, 140, 88, 47, 125, 96, 54, 72, 130, 139, 150, 152, 141, 141, 100, 21, 18, 21, 28, 28, 45, 31, 32, 31, 31, 36, 37, 33, 82, 130, 129, 131, 104, 129, 120, 83, 69, 33, 35, 57, 52, 42, 43, 34, 51, 70, 106, 133, 152, 155, 158, 151, 143, 121, 63, 114, 122, 132, 132, 114, 103, 128, 135, 107, 94, 95, 97, 115, 123, 109, 110, 124, 130, 138, 135, 136, 116, 111, 82, 128, 127, 133, 140, 131, 135, 132, 120, 96, 66, 50, 44, 32, 25, 27, 25, 25, 33, 37, 38, 66, 101, 99, 113, 99, 139, 147, 152, 154, 157, 161, 157, 164, 162, 162, 160, 156, 144, 134, 132, 137, 139, 146, 142, 141, 141, 141, 142, 142, 143, 140, 139, 138, 137, 136, 133, 134, 133, 132, 132, 130, 130, 132, 129, 129, 129, 122, 124, 125, 124, 125, 123, 124, 124, 124, 122, 122, 122, 121, 117, 117, 117, 118, 116, 114, 13, 10, 12, 16, 16, 12, 23, 26, 18, 14, 14, 15, 15, 6, 15, 13, 11, 14, 1, 4, 18, 25, 41, 40, 47, 27, 24, 39, 40, 22, 4, 16, 19, 21, 21, 17, 17, 15, 13, 20, 20, 22, 15, 13, 15, 13, 10, 19, 21, 20, 29, 51, 36, 60, 56, 1, 8, 13, 9, 7, 9, 9, 9, 13, 10, 9, 13, 10, 25, 18, 16, 25, 81, 149, 120, 141, 129, 129, 123, 63, 107, 130, 127, 132, 42, 31, 104, 47, 89, 12, 20, 25, 15, 19, 130, 127, 138, 134, 133, 32, 32, 82, 13, 10, 8, 102, 106, 97, 75, 30, 114, 65, 27, 18, 22, 30, 33, 37, 32, 35, 28, 29, 36, 34, 27, 105, 120, 130, 134, 124, 103, 120, 91, 76, 34, 52, 59, 61, 47, 101, 92, 97, 116, 137, 141, 146, 161, 160, 152, 140, 129, 68, 115, 113, 134, 135, 122, 82, 104, 89, 43, 37, 38, 34, 49, 37, 61, 57, 102, 109, 133, 136, 144, 128, 131, 142, 150, 120, 126, 140, 145, 140, 132, 128, 110, 95, 30, 38, 43, 40, 33, 32, 30, 36, 46, 48, 35, 104, 110, 102, 66, 111, 116, 141, 152, 158, 158, 159, 161, 160, 165, 166, 159, 151, 140, 136, 134, 139, 140, 141, 143, 144, 144, 141, 141, 143, 146, 143, 138, 140, 140, 136, 134, 134, 134, 131, 129, 129, 127, 129, 132, 116, 98, 107, 124, 124, 123, 121, 119, 124, 122, 119, 124, 120, 121, 117, 120, 119, 116, 115, 115, 13, 12, 11, 16, 16, 15, 12, 14, 23, 13, 13, 10, 14, 8, 8, 13, 10, 8, 7, 2, 5, 15, 31, 30, 39, 27, 4, 1, 5, 9, 11, 5, 15, 24, 24, 21, 14, 17, 6, 14, 19, 26, 27, 20, 21, 23, 25, 23, 25, 25, 35, 45, 34, 54, 63, 21, 8, 13, 9, 7, 9, 9, 9, 9, 8, 5, 18, 16, 6, 4, 14, 93, 114, 125, 110, 128, 105, 16, 89, 117, 128, 63, 8, 8, 18, 17, 23, 22, 21, 19, 15, 17, 74, 80, 35, 61, 66, 26, 18, 33, 15, 8, 25, 29, 22, 25, 27, 45, 32, 35, 28, 28, 30, 35, 35, 35, 35, 33, 33, 35, 32, 12, 98, 111, 122, 138, 119, 91, 82, 43, 77, 55, 78, 80, 76, 50, 112, 140, 137, 134, 149, 146, 143, 158, 160, 145, 135, 132, 104, 104, 102, 118, 141, 137, 141, 123, 85, 55, 54, 42, 36, 36, 84, 104, 105, 59, 28, 70, 132, 137, 148, 134, 140, 141, 124, 122, 141, 150, 146, 148, 139, 118, 82, 38, 46, 47, 72, 70, 55, 45, 39, 55, 78, 47, 113, 112, 113, 110, 93, 19, 19, 67, 131, 155, 160, 158, 161, 163, 171, 159, 156, 149, 135, 133, 136, 142, 146, 145, 146, 148, 144, 140, 143, 143, 142, 140, 139, 138, 136, 133, 133, 133, 131, 131, 131, 132, 125, 134, 114, 105, 111, 122, 106, 108, 119, 125, 119, 121, 117, 112, 121, 112, 115, 119, 118, 117, 115, 114, 16, 15, 12, 11, 12, 15, 18, 21, 31, 25, 20, 20, 16, 14, 36, 56, 34, 18, 19, 13, 10, 12, 2, 11, 9, 13, 3, 14, 20, 13, 12, 14, 26, 19, 18, 19, 20, 16, 16, 27, 27, 24, 30, 36, 31, 32, 31, 33, 34, 30, 39, 44, 42, 64, 37, 9, 13, 11, 7, 9, 9, 9, 9, 12, 15, 9, 2, 6, 34, 51, 69, 100, 104, 81, 105, 124, 5, 82, 103, 44, 15, 13, 15, 14, 22, 24, 27, 28, 19, 22, 28, 25, 31, 29, 28, 25, 17, 25, 20, 22, 26, 32, 33, 26, 29, 31, 29, 26, 30, 22, 31, 31, 35, 40, 33, 33, 29, 31, 29, 24, 24, 83, 107, 126, 132, 132, 125, 111, 113, 120, 118, 122, 107, 101, 96, 127, 133, 134, 157, 165, 155, 134, 148, 132, 119, 127, 118, 125, 104, 94, 103, 138, 139, 129, 132, 104, 98, 62, 52, 49, 43, 47, 79, 104, 107, 31, 2, 108, 129, 147, 130, 138, 129, 113, 123, 140, 150, 155, 160, 151, 151, 69, 54, 42, 39, 55, 72, 50, 63, 46, 47, 50, 119, 123, 125, 125, 115, 114, 3, 13, 10, 13, 10, 15, 26, 93, 150, 160, 162, 160, 165, 160, 152, 142, 137, 134, 138, 146, 146, 148, 148, 146, 142, 144, 142, 143, 142, 139, 138, 138, 137, 135, 133, 132, 132, 132, 133, 125, 116, 124, 108, 105, 107, 99, 85, 84, 105, 118, 102, 91, 85, 102, 96, 104, 109, 117, 116, 116, 115, 11, 15, 13, 21, 27, 25, 27, 39, 42, 53, 43, 25, 12, 16, 26, 13, 19, 17, 30, 25, 29, 11, 13, 18, 14, 7, 13, 10, 16, 22, 6, 2, 14, 21, 23, 27, 29, 26, 27, 30, 31, 24, 28, 37, 40, 47, 46, 38, 36, 33, 25, 23, 33, 47, 60, 13, 10, 13, 11, 7, 9, 9, 9, 13, 10, 8, 14, 14, 40, 57, 60, 74, 65, 87, 73, 31, 29, 121, 59, 26, 25, 22, 11, 21, 13, 10, 15, 32, 37, 36, 37, 27, 33, 35, 26, 25, 28, 26, 26, 29, 22, 21, 24, 32, 36, 36, 36, 36, 31, 28, 28, 30, 30, 29, 33, 35, 37, 36, 32, 26, 28, 26, 28, 23, 60, 119, 128, 143, 152, 143, 146, 140, 132, 138, 146, 134, 140, 117, 104, 104, 117, 143, 156, 150, 142, 137, 121, 103, 31, 76, 126, 129, 103, 109, 132, 140, 140, 132, 143, 107, 80, 59, 44, 47, 30, 60, 97, 110, 96, 9, 90, 132, 123, 129, 140, 116, 106, 120, 135, 154, 159, 159, 151, 155, 125, 114, 94, 66, 55, 85, 65, 110, 85, 29, 91, 132, 130, 139, 130, 127, 97, 12, 3, 11, 15, 9, 12, 13, 53, 134, 168, 163, 162, 159, 147, 135, 133, 135, 139, 145, 146, 143, 146, 147, 144, 145, 145, 143, 141, 139, 141, 138, 137, 137, 135, 133, 130, 129, 113, 83, 119, 94, 100, 89, 96, 84, 80, 68, 67, 58, 62, 77, 91, 101, 95, 96, 110, 112, 114, 115, 13, 15, 12, 15, 15, 21, 37, 46, 36, 23, 1, 13, 22, 23, 28, 28, 14, 21, 24, 18, 19, 12, 20, 19, 8, 9, 8, 9, 8, 13, 13, 10, 21, 13, 16, 33, 42, 30, 35, 55, 43, 56, 57, 43, 48, 37, 52, 62, 58, 58, 48, 40, 84, 76, 70, 6, 5, 14, 15, 4, 1, 1, 3, 27, 44, 47, 59, 61, 58, 82, 77, 51, 15, 17, 14, 36, 41, 27, 28, 30, 21, 21, 20, 27, 36, 29, 25, 29, 32, 26, 30, 36, 35, 39, 29, 30, 31, 27, 28, 30, 32, 38, 38, 37, 39, 38, 35, 37, 34, 31, 34, 36, 36, 36, 39, 32, 33, 38, 36, 22, 16, 105, 139, 131, 151, 153, 146, 154, 169, 156, 155, 152, 143, 148, 135, 120, 126, 147, 160, 140, 145, 141, 110, 101, 38, 16, 34, 117, 127, 113, 110, 122, 145, 145, 139, 138, 126, 108, 89, 48, 68, 48, 55, 75, 96, 92, 48, 18, 139, 139, 143, 133, 120, 120, 122, 136, 145, 158, 168, 159, 164, 148, 141, 151, 155, 140, 123, 93, 146, 149, 87, 105, 115, 151, 150, 143, 117, 48, 23, 14, 12, 12, 12, 12, 12, 12, 16, 25, 77, 151, 155, 145, 126, 126, 132, 134, 136, 143, 153, 155, 152, 148, 151, 148, 146, 144, 143, 142, 137, 140, 137, 132, 136, 116, 121, 101, 94, 120, 97, 49, 58, 57, 80, 46, 35, 62, 53, 38, 27, 32, 46, 81, 81, 81, 77, 113, 126, 19, 16, 17, 23, 19, 21, 29, 32, 27, 22, 19, 26, 31, 24, 20, 18, 15, 15, 14, 13, 31, 14, 8, 14, 9, 11, 14, 2, 9, 13, 10, 4, 23, 25, 43, 50, 60, 56, 53, 46, 41, 39, 31, 40, 59, 58, 50, 47, 46, 45, 36, 49, 81, 84, 60, 2, 2, 5, 14, 27, 38, 45, 47, 41, 39, 55, 54, 53, 58, 70, 58, 47, 23, 18, 29, 24, 23, 33, 28, 31, 28, 27, 25, 29, 35, 39, 28, 26, 29, 27, 27, 37, 37, 36, 35, 32, 31, 32, 33, 33, 36, 37, 41, 40, 37, 36, 36, 31, 34, 34, 35, 34, 32, 43, 33, 32, 32, 29, 27, 29, 25, 86, 132, 130, 154, 169, 169, 162, 147, 166, 177, 155, 147, 146, 130, 114, 119, 129, 131, 119, 123, 62, 30, 89, 28, 8, 59, 75, 133, 135, 117, 108, 140, 119, 135, 142, 134, 103, 106, 73, 111, 49, 57, 54, 86, 90, 83, 30, 87, 125, 131, 136, 120, 127, 123, 138, 140, 153, 170, 173, 167, 170, 158, 165, 169, 156, 146, 141, 145, 152, 149, 151, 130, 162, 151, 144, 125, 61, 15, 15, 12, 12, 12, 12, 12, 12, 12, 14, 7, 18, 38, 101, 138, 129, 130, 127, 140, 145, 149, 152, 152, 149, 151, 148, 148, 144, 144, 143, 142, 138, 137, 139, 133, 114, 118, 107, 108, 104, 71, 64, 62, 46, 23, 31, 79, 83, 76, 60, 32, 23, 32, 41, 53, 54, 67, 83, 105, 24, 17, 22, 18, 26, 25, 19, 19, 23, 26, 26, 23, 27, 16, 12, 13, 17, 16, 17, 28, 45, 27, 16, 17, 23, 6, 9, 5, 9, 15, 7, 34, 51, 60, 59, 60, 59, 53, 45, 32, 32, 52, 55, 53, 59, 52, 59, 62, 55, 50, 47, 55, 58, 48, 24, 25, 36, 45, 47, 34, 34, 43, 31, 30, 46, 39, 34, 64, 68, 57, 40, 12, 25, 26, 22, 27, 17, 24, 27, 33, 35, 34, 35, 40, 39, 33, 27, 26, 29, 28, 36, 37, 35, 34, 33, 34, 33, 33, 32, 40, 35, 42, 38, 39, 38, 35, 31, 31, 30, 31, 34, 34, 39, 36, 33, 27, 30, 23, 33, 36, 33, 115, 121, 149, 150, 158, 159, 122, 148, 153, 147, 146, 135, 114, 71, 46, 41, 48, 49, 18, 44, 69, 73, 34, 36, 101, 51, 154, 155, 143, 115, 127, 107, 127, 144, 131, 124, 98, 83, 73, 72, 61, 61, 76, 89, 84, 66, 71, 117, 131, 136, 128, 132, 130, 131, 137, 156, 169, 174, 184, 164, 158, 158, 159, 140, 129, 166, 154, 161, 158, 145, 147, 169, 152, 146, 133, 109, 11, 14, 12, 12, 12, 12, 12, 12, 6, 4, 9, 13, 11, 9, 35, 61, 105, 124, 130, 137, 147, 147, 148, 149, 150, 149, 149, 147, 146, 145, 143, 144, 141, 133, 117, 114, 117, 112, 113, 112, 91, 72, 92, 88, 75, 60, 73, 86, 81, 72, 52, 34, 25, 28, 32, 32, 42, 66, 87, 28, 24, 23, 20, 20, 12, 20, 23, 22, 22, 17, 12, 14, 14, 16, 17, 22, 25, 29, 27, 50, 44, 43, 49, 84, 92, 63, 70, 86, 53, 17, 57, 66, 63, 61, 64, 65, 52, 40, 37, 43, 49, 56, 71, 81, 66, 59, 49, 41, 31, 35, 32, 29, 32, 36, 35, 36, 38, 37, 39, 46, 29, 25, 29, 35, 39, 39, 47, 56, 43, 33, 13, 31, 21, 23, 23, 17, 20, 27, 33, 35, 38, 38, 39, 36, 36, 32, 23, 32, 32, 35, 35, 35, 33, 33, 34, 31, 32, 33, 38, 34, 37, 38, 39, 38, 35, 35, 33, 29, 31, 35, 36, 37, 41, 32, 28, 32, 28, 28, 50, 37, 27, 148, 144, 158, 148, 139, 116, 129, 134, 146, 148, 57, 47, 27, 35, 46, 31, 62, 72, 75, 100, 38, 34, 52, 110, 75, 149, 148, 141, 130, 113, 107, 125, 155, 149, 134, 44, 73, 64, 62, 76, 71, 71, 78, 73, 55, 56, 114, 130, 130, 139, 142, 139, 130, 132, 146, 163, 174, 175, 162, 152, 157, 161, 138, 117, 152, 157, 162, 165, 158, 148, 161, 150, 145, 132, 116, 13, 12, 12, 12, 12, 12, 12, 12, 7, 9, 11, 9, 13, 10, 9, 13, 10, 9, 18, 44, 86, 131, 145, 143, 141, 146, 148, 149, 149, 148, 147, 146, 144, 146, 142, 129, 83, 98, 119, 121, 118, 126, 120, 92, 90, 92, 90, 78, 49, 76, 72, 75, 71, 60, 35, 13, 10, 16, 19, 26, 32, 68, 29, 25, 22, 16, 14, 16, 24, 26, 25, 18, 9, 11, 15, 17, 23, 22, 31, 33, 36, 32, 44, 59, 96, 88, 84, 90, 93, 111, 111, 76, 44, 53, 55, 52, 52, 48, 53, 42, 42, 39, 54, 66, 71, 73, 55, 43, 36, 36, 44, 48, 43, 34, 29, 26, 31, 36, 40, 44, 44, 40, 35, 30, 31, 27, 28, 32, 38, 41, 51, 37, 25, 16, 33, 29, 23, 24, 17, 24, 32, 34, 34, 38, 40, 35, 34, 36, 30, 24, 35, 34, 34, 33, 40, 36, 32, 31, 31, 31, 33, 35, 33, 32, 40, 36, 36, 39, 37, 34, 33, 34, 35, 34, 38, 37, 28, 29, 29, 30, 34, 29, 76, 127, 153, 146, 138, 115, 116, 119, 121, 132, 134, 62, 1, 112, 113, 115, 122, 119, 115, 93, 55, 67, 33, 28, 40, 72, 90, 130, 143, 140, 146, 117, 107, 140, 168, 166, 161, 138, 160, 116, 78, 52, 54, 42, 36, 41, 58, 43, 98, 136, 128, 148, 158, 118, 119, 127, 140, 159, 169, 159, 136, 105, 154, 168, 150, 126, 151, 158, 162, 168, 167, 160, 156, 145, 138, 133, 115, 49, 13, 10, 12, 12, 12, 12, 12, 12, 9, 8, 11, 8, 8, 13, 10, 5, 13, 10, 9, 14, 9, 31, 68, 116, 138, 143, 146, 143, 147, 147, 149, 145, 148, 147, 143, 131, 92, 105, 116, 126, 127, 128, 125, 121, 85, 89, 91, 87, 63, 62, 43, 66, 78, 72, 54, 16, 22, 22, 13, 22, 43, 23, 19, 18, 17, 21, 21, 24, 23, 20, 17, 15, 18, 19, 24, 34, 39, 47, 46, 45, 36, 46, 37, 37, 43, 37, 31, 27, 34, 34, 45, 28, 51, 47, 52, 38, 41, 37, 40, 52, 55, 59, 48, 32, 20, 16, 37, 51, 53, 57, 52, 41, 42, 38, 37, 35, 34, 25, 28, 31, 32, 30, 26, 38, 37, 24, 23, 36, 44, 36, 48, 37, 14, 29, 36, 23, 27, 25, 31, 32, 36, 29, 31, 36, 28, 33, 30, 24, 21, 29, 28, 31, 33, 41, 36, 32, 32, 30, 29, 30, 33, 29, 27, 38, 34, 39, 39, 36, 32, 35, 36, 36, 36, 36, 34, 29, 26, 30, 28, 28, 29, 126, 141, 149, 144, 134, 123, 122, 113, 111, 146, 81, 8, 17, 117, 117, 122, 120, 120, 98, 48, 43, 39, 30, 32, 29, 39, 80, 122, 130, 134, 154, 137, 129, 151, 175, 164, 186, 171, 174, 167, 159, 128, 102, 53, 33, 32, 40, 34, 109, 140, 138, 157, 164, 135, 129, 123, 143, 159, 174, 143, 116, 94, 156, 174, 165, 145, 157, 158, 159, 163, 168, 160, 149, 136, 138, 136, 106, 69, 11, 12, 12, 12, 12, 12, 12, 11, 11, 11, 9, 13, 10, 11, 11, 7, 9, 13, 10, 13, 10, 24, 14, 19, 44, 91, 122, 143, 138, 143, 141, 144, 147, 141, 140, 129, 88, 97, 113, 122, 132, 133, 126, 123, 109, 101, 100, 100, 81, 64, 30, 52, 63, 59, 41, 24, 31, 19, 14, 17, 25, 15, 19, 19, 21, 21, 19, 15, 17, 15, 26, 26, 34, 28, 34, 30, 34, 34, 37, 40, 36, 44, 45, 17, 25, 20, 28, 26, 18, 22, 23, 8, 44, 52, 49, 43, 46, 52, 40, 43, 31, 15, 4, 1, 5, 17, 43, 39, 35, 37, 35, 28, 35, 38, 38, 35, 31, 30, 35, 33, 36, 31, 32, 39, 41, 37, 29, 42, 30, 33, 51, 42, 17, 28, 37, 25, 24, 30, 35, 31, 31, 34, 28, 25, 19, 24, 16, 22, 18, 32, 28, 28, 32, 34, 31, 30, 31, 31, 31, 29, 30, 33, 28, 35, 35, 41, 37, 34, 33, 33, 34, 34, 34, 35, 36, 32, 25, 30, 21, 31, 26, 106, 128, 141, 141, 95, 113, 126, 125, 134, 126, 19, 16, 101, 104, 122, 129, 117, 109, 68, 41, 25, 32, 28, 27, 28, 34, 46, 81, 104, 128, 148, 152, 159, 159, 171, 148, 181, 179, 173, 182, 189, 191, 153, 110, 69, 70, 47, 68, 111, 143, 143, 146, 171, 136, 121, 133, 134, 150, 172, 153, 127, 128, 163, 177, 174, 165, 158, 158, 161, 160, 164, 156, 138, 147, 127, 117, 96, 55, 11, 12, 12, 12, 12, 12, 12, 12, 12, 12, 11, 11, 13, 10, 5, 15, 4, 32, 90, 115, 66, 63, 97, 65, 81, 97, 110, 122, 131, 123, 124, 133, 134, 113, 89, 100, 113, 122, 132, 138, 130, 131, 115, 80, 94, 95, 90, 73, 34, 22, 29, 23, 16, 12, 28, 23, 13, 17, 9, 14, 17, 16, 16, 14, 13, 15, 20, 26, 34, 37, 37, 30, 34, 33, 37, 41, 45, 48, 44, 63, 55, 12, 16, 12, 13, 23, 15, 24, 16, 1, 47, 34, 47, 36, 15, 8, 1, 4, 6, 6, 4, 9, 13, 10, 17, 32, 24, 32, 29, 28, 20, 23, 26, 25, 27, 24, 24, 23, 21, 24, 26, 25, 32, 41, 36, 28, 48, 46, 44, 58, 52, 13, 30, 31, 22, 23, 31, 34, 32, 27, 21, 22, 18, 31, 48, 36, 22, 15, 30, 25, 29, 33, 32, 30, 31, 29, 31, 34, 33, 28, 37, 35, 32, 34, 38, 35, 32, 33, 28, 29, 29, 29, 35, 35, 32, 24, 26, 20, 25, 31, 48, 64, 85, 75, 44, 134, 145, 140, 142, 114, 2, 74, 105, 104, 123, 120, 111, 100, 58, 33, 33, 46, 45, 50, 47, 28, 23, 46, 83, 128, 149, 162, 167, 169, 176, 181, 194, 191, 176, 185, 184, 176, 174, 134, 139, 119, 46, 43, 135, 144, 144, 155, 161, 145, 142, 130, 151, 156, 164, 165, 150, 147, 166, 171, 165, 163, 155, 158, 166, 157, 158, 153, 143, 133, 134, 112, 93, 47, 12, 12, 12, 12, 12, 12, 12, 12, 12, 12, 12, 12, 11, 11, 1, 61, 107, 124, 116, 122, 109, 104, 104, 96, 92, 94, 104, 104, 103, 108, 106, 114, 125, 124, 105, 109, 121, 125, 141, 136, 142, 109, 68, 101, 103, 104, 90, 33, 21, 43, 31, 35, 23, 30, 33, 33, 7, 6, 19, 17, 15, 14, 18, 25, 24, 21, 39, 46, 36, 35, 38, 32, 39, 42, 34, 44, 54, 46, 54, 61, 14, 9, 13, 10, 8, 13, 10, 6, 15, 27, 31, 40, 38, 33, 16, 4, 11, 13, 14, 11, 12, 16, 15, 11, 18, 27, 24, 17, 21, 21, 18, 17, 15, 21, 24, 33, 29, 29, 21, 24, 22, 21, 30, 44, 33, 33, 39, 34, 51, 64, 13, 10, 31, 22, 22, 26, 36, 35, 30, 32, 39, 43, 37, 33, 34, 65, 63, 28, 32, 31, 33, 33, 32, 32, 32, 28, 26, 33, 34, 31, 29, 36, 33, 31, 34, 33, 32, 32, 23, 32, 32, 32, 33, 32, 29, 25, 22, 23, 24, 20, 19, 19, 17, 15, 77, 141, 143, 146, 144, 124, 34, 96, 118, 103, 117, 112, 111, 81, 51, 43, 50, 50, 52, 58, 57, 29, 18, 41, 57, 116, 154, 164, 161, 170, 172, 181, 189, 194, 189, 182, 174, 181, 183, 125, 160, 157, 129, 99, 162, 158, 139, 158, 162, 150, 147, 124, 147, 153, 159, 176, 165, 166, 171, 156, 146, 156, 155, 163, 158, 156, 152, 152, 158, 135, 137, 104, 84, 33, 12, 12, 12, 12, 12, 12, 12, 12, 12, 12, 11, 15, 20, 9, 55, 140, 129, 123, 120, 117, 121, 102, 95, 98, 91, 66, 86, 101, 97, 103, 108, 112, 130, 136, 101, 113, 121, 126, 135, 136, 144, 121, 111, 112, 122, 121, 103, 13, 22, 33, 28, 21, 24, 47, 58, 36, 24, 18, 13, 16, 24, 24, 24, 26, 32, 33, 44, 35, 45, 42, 33, 22, 26, 38, 43, 48, 51, 40, 45, 64, 6, 12, 11, 2, 6, 24, 28, 33, 41, 29, 25, 27, 8, 19, 13, 8, 13, 10, 11, 11, 13, 10, 9, 11, 26, 26, 15, 28, 22, 14, 23, 28, 34, 30, 31, 35, 32, 22, 23, 19, 22, 27, 39, 35, 35, 36, 28, 27, 56, 65, 15, 18, 21, 31, 36, 28, 23, 17, 23, 22, 24, 22, 32, 42, 50, 89, 46, 22, 30, 28, 28, 28, 27, 28, 24, 26, 28, 34, 36, 33, 29, 30, 30, 33, 34, 32, 32, 25, 18, 27, 28, 29, 27, 25, 26, 28, 27, 26, 21, 15, 15, 27, 15, 85, 132, 150, 161, 146, 127, 38, 47, 96, 98, 104, 120, 100, 81, 28, 43, 37, 58, 72, 59, 48, 50, 46, 63, 69, 115, 158, 159, 163, 149, 159, 185, 196, 200, 192, 191, 185, 188, 181, 163, 172, 179, 176, 181, 182, 172, 153, 140, 116, 145, 146, 94, 143, 161, 157, 151, 158, 172, 168, 136, 150, 157, 148, 133, 130, 133, 151, 158, 153, 133, 131, 103, 102, 25, 24, 5, 4, 9, 15, 17, 17, 13, 7, 14, 18, 24, 123, 98, 130, 141, 129, 123, 121, 115, 115, 86, 54, 23, 22, 22, 33, 40, 54, 73, 95, 111, 126, 133, 124, 116, 114, 125, 122, 120, 134, 127, 99, 106, 122, 122, 115, 25, 37, 39, 34, 31, 23, 46, 42, 47, 30, 26, 24, 25, 29, 39, 40, 41, 38, 37, 41, 34, 36, 46, 41, 32, 37, 40, 42, 40, 41, 45, 58, 73, 8, 13, 10, 35, 45, 45, 30, 31, 34, 33, 24, 18, 25, 7, 20, 13, 9, 13, 10, 11, 11, 11, 13, 10, 11, 27, 31, 21, 27, 37, 29, 30, 36, 37, 36, 39, 37, 31, 36, 38, 39, 44, 47, 44, 36, 36, 34, 24, 15, 24, 28, 22, 32, 34, 39, 41, 47, 43, 42, 33, 28, 28, 31, 21, 32, 54, 90, 86, 37, 39, 31, 29, 27, 27, 27, 25, 32, 33, 36, 36, 30, 27, 28, 28, 31, 35, 31, 29, 26, 15, 18, 18, 17, 15, 14, 17, 18, 18, 15, 13, 13, 10, 12, 14, 80, 136, 137, 149, 155, 161, 137, 112, 40, 84, 104, 119, 133, 110, 118, 38, 67, 42, 70, 85, 105, 42, 67, 61, 72, 104, 136, 176, 154, 155, 152, 155, 185, 195, 193, 196, 190, 190, 186, 185, 184, 180, 169, 170, 177, 191, 183, 176, 157, 127, 140, 143, 126, 147, 149, 158, 167, 173, 176, 169, 151, 154, 142, 145, 140, 98, 114, 136, 143, 132, 131, 120, 104, 72, 15, 6, 17, 9, 14, 38, 17, 20, 12, 20, 16, 18, 87, 126, 117, 134, 131, 107, 100, 43, 58, 31, 22, 39, 61, 16, 26, 25, 36, 45, 53, 68, 81, 92, 104, 121, 120, 120, 134, 122, 126, 143, 133, 130, 126, 131, 137, 130, 58, 90, 67, 34, 18, 31, 42, 36, 31, 29, 36, 22, 30, 40, 40, 39, 34, 34, 36, 35, 31, 34, 41, 36, 38, 42, 48, 54, 68, 59, 52, 56, 59, 8, 22, 44, 40, 35, 35, 26, 22, 27, 34, 23, 22, 25, 4, 19, 11, 9, 11, 12, 12, 11, 12, 11, 20, 33, 20, 37, 46, 37, 44, 40, 34, 35, 38, 40, 42, 51, 48, 56, 46, 25, 20, 12, 9, 8, 15, 11, 16, 16, 13, 17, 21, 22, 24, 28, 37, 36, 34, 23, 34, 45, 32, 23, 50, 67, 90, 52, 31, 32, 30, 29, 29, 29, 27, 36, 36, 35, 35, 28, 28, 25, 26, 30, 30, 26, 23, 13, 12, 12, 11, 12, 12, 11, 12, 13, 12, 13, 12, 13, 14, 8, 55, 136, 146, 153, 160, 158, 156, 147, 137, 140, 130, 125, 131, 103, 106, 54, 82, 72, 96, 157, 70, 60, 76, 80, 107, 136, 145, 171, 159, 156, 155, 163, 182, 191, 185, 191, 189, 191, 188, 187, 186, 177, 179, 169, 178, 188, 188, 193, 171, 143, 138, 135, 138, 123, 143, 155, 179, 168, 161, 162, 160, 160, 136, 147, 154, 120, 121, 127, 131, 122, 121, 123, 118, 113, 115, 108, 79, 54, 123, 101, 42, 25, 17, 30, 72, 121, 126, 124, 122, 118, 99, 74, 114, 92, 96, 55, 33, 77, 52, 45, 33, 13, 22, 26, 40, 42, 47, 52, 66, 101, 123, 127, 131, 124, 137, 141, 131, 148, 126, 134, 143, 145, 135, 136, 117, 96, 49, 96, 91, 78, 71, 79, 91, 32, 34, 33, 33, 35, 30, 30, 34, 34, 35, 38, 36, 35, 39, 44, 53, 57, 60, 56, 50, 40, 40, 36, 35, 33, 28, 30, 19, 20, 19, 24, 33, 35, 28, 31, 3, 19, 13, 10, 7, 9, 13, 10, 13, 10, 13, 10, 11, 9, 27, 45, 28, 33, 49, 46, 37, 32, 26, 23, 31, 23, 11, 15, 14, 9, 6, 7, 9, 11, 15, 12, 26, 15, 14, 17, 11, 16, 17, 19, 18, 18, 29, 33, 33, 30, 33, 56, 60, 53, 48, 63, 73, 61, 19, 32, 32, 32, 31, 31, 31, 35, 35, 31, 34, 27, 32, 29, 31, 26, 17, 13, 12, 11, 12, 13, 10, 13, 10, 12, 12, 12, 12, 13, 13, 11, 13, 10, 11, 13, 13, 8, 118, 138, 145, 160, 146, 154, 145, 145, 153, 148, 130, 117, 103, 96, 49, 80, 105, 115, 119, 86, 52, 84, 85, 124, 138, 156, 158, 171, 157, 144, 169, 179, 182, 182, 179, 185, 184, 189, 186, 186, 176, 179, 128, 165, 189, 197, 189, 172, 153, 135, 139, 128, 81, 119, 145, 172, 155, 140, 145, 147, 161, 156, 151, 134, 133, 117, 118, 119, 116, 125, 145, 147, 141, 125, 133, 136, 137, 139, 143, 134, 61, 77, 115, 141, 128, 109, 117, 130, 118, 87, 100, 111, 115, 109, 84, 33, 75, 51, 73, 39, 12, 9, 9, 9, 22, 21, 27, 36, 63, 101, 122, 127, 120, 141, 142, 130, 146, 103, 124, 137, 144, 140, 135, 135, 129, 104, 102, 98, 104, 107, 98, 103, 29, 26, 35, 29, 29, 30, 33, 31, 39, 50, 42, 33, 35, 41, 49, 47, 52, 45, 46, 37, 32, 34, 32, 27, 27, 18, 27, 29, 25, 18, 25, 26, 30, 26, 36, 7, 12, 8, 8, 9, 12, 9, 11, 8, 14, 26, 35, 36, 37, 32, 24, 20, 11, 5, 6, 21, 18, 3, 14, 13, 14, 13, 14, 15, 20, 14, 11, 29, 20, 21, 23, 21, 20, 21, 24, 22, 26, 28, 31, 34, 40, 43, 45, 80, 78, 58, 75, 63, 56, 8, 31, 31, 30, 32, 30, 32, 33, 32, 32, 36, 28, 30, 32, 29, 29, 13, 11, 11, 11, 11, 11, 11, 13, 10, 11, 12, 12, 12, 12, 12, 12, 12, 13, 4, 4, 121, 124, 146, 144, 139, 146, 152, 153, 149, 156, 147, 159, 162, 159, 153, 161, 163, 166, 159, 119, 87, 88, 112, 134, 148, 151, 158, 157, 167, 152, 181, 172, 177, 181, 188, 187, 186, 186, 185, 184, 170, 180, 158, 175, 198, 194, 184, 170, 157, 131, 141, 125, 89, 114, 132, 162, 158, 138, 114, 121, 154, 169, 148, 133, 126, 128, 126, 129, 124, 121, 141, 146, 143, 146, 144, 141, 132, 131, 127, 128, 147, 139, 139, 143, 39, 103, 118, 130, 131, 112, 98, 117, 122, 114, 96, 34, 81, 89, 82, 59, 44, 35, 22, 32, 13, 17, 9, 9, 30, 53, 90, 110, 119, 125, 137, 143, 149, 116, 129, 120, 125, 131, 135, 125, 119, 112, 103, 107, 108, 113, 105, 95, 23, 29, 38, 38, 33, 33, 39, 43, 46, 46, 36, 34, 33, 36, 35, 39, 39, 41, 41, 34, 34, 31, 24, 15, 19, 21, 25, 21, 16, 24, 30, 34, 23, 31, 23, 6, 13, 9, 13, 10, 12, 19, 14, 9, 7, 13, 10, 18, 43, 25, 28, 17, 15, 12, 11, 8, 9, 21, 16, 4, 16, 17, 17, 15, 15, 15, 19, 14, 11, 37, 25, 26, 31, 33, 37, 37, 41, 42, 46, 33, 38, 40, 41, 55, 44, 74, 92, 77, 67, 65, 47, 8, 30, 26, 30, 31, 31, 28, 33, 34, 33, 31, 31, 27, 26, 23, 26, 14, 11, 11, 11, 11, 11, 11, 13, 10, 11, 12, 12, 12, 12, 12, 12, 12, 13, 11, 7, 62, 121, 167, 144, 146, 145, 149, 158, 152, 131, 163, 179, 174, 167, 167, 175, 177, 187, 169, 147, 106, 129, 164, 150, 148, 154, 165, 163, 167, 159, 180, 163, 176, 177, 187, 198, 185, 181, 186, 187, 171, 164, 170, 178, 184, 189, 180, 158, 147, 113, 131, 133, 81, 102, 141, 150, 149, 136, 124, 135, 146, 153, 137, 130, 130, 138, 133, 129, 129, 112, 106, 121, 137, 142, 131, 134, 125, 117, 122, 131, 129, 121, 130, 134, 81, 82, 113, 137, 141, 147, 146, 115, 127, 121, 112, 45, 95, 106, 100, 87, 69, 52, 43, 27, 34, 30, 8, 2, 5, 6, 57, 84, 103, 119, 126, 135, 144, 133, 123, 113, 118, 125, 132, 125, 115, 103, 105, 111, 87, 99, 93, 73, 28, 34, 37, 34, 31, 33, 45, 51, 45, 37, 40, 40, 37, 28, 35, 38, 41, 32, 29, 32, 26, 25, 26, 27, 27, 28, 28, 20, 31, 32, 34, 33, 24, 30, 32, 5, 14, 8, 8, 12, 19, 20, 14, 13, 10, 29, 21, 15, 3, 14, 17, 16, 22, 19, 12, 14, 25, 15, 5, 13, 13, 14, 11, 11, 11, 12, 11, 7, 40, 37, 41, 37, 37, 40, 43, 41, 47, 49, 36, 43, 49, 61, 68, 70, 71, 79, 91, 64, 70, 51, 14, 17, 16, 27, 27, 28, 24, 19, 25, 28, 19, 33, 23, 14, 13, 17, 12, 11, 11, 11, 11, 11, 11, 13, 10, 11, 12, 12, 12, 12, 12, 12, 12, 11, 11, 12, 2, 144, 128, 161, 153, 150, 154, 155, 133, 123, 169, 174, 152, 180, 172, 176, 174, 179, 179, 154, 144, 174, 179, 159, 150, 154, 166, 163, 171, 164, 176, 160, 155, 171, 187, 192, 187, 180, 183, 176, 167, 160, 168, 166, 161, 161, 153, 151, 124, 128, 146, 107, 78, 108, 137, 144, 153, 154, 147, 149, 147, 147, 123, 135, 147, 147, 138, 127, 105, 41, 36, 21, 57, 107, 114, 91, 38, 23, 51, 63, 77, 96, 119, 135, 136, 91, 110, 119, 133, 145, 140, 97, 120, 119, 103, 45, 106, 121, 113, 103, 87, 28, 33, 32, 18, 2, 17, 23, 52, 74, 109, 117, 116, 129, 139, 138, 123, 111, 122, 124, 129, 127, 121, 111, 112, 112, 98, 93, 59, 41, 26, 28, 33, 38, 39, 41, 45, 40, 35, 34, 32, 37, 42, 34, 36, 31, 26, 28, 27, 18, 21, 24, 30, 36, 31, 30, 25, 43, 52, 32, 29, 25, 29, 31, 47, 13, 10, 22, 16, 9, 16, 13, 10, 32, 74, 113, 74, 25, 8, 11, 19, 28, 26, 36, 25, 15, 20, 36, 19, 8, 9, 13, 10, 11, 8, 8, 7, 7, 8, 1, 44, 39, 52, 46, 41, 51, 62, 61, 69, 71, 63, 62, 69, 67, 69, 86, 78, 63, 76, 73, 68, 75, 45, 11, 11, 15, 13, 15, 13, 13, 10, 12, 13, 13, 10, 11, 12, 7, 13, 10, 11, 12, 11, 11, 11, 11, 11, 11, 13, 10, 11, 12, 12, 12, 12, 12, 12, 12, 15, 18, 14, 7, 151, 119, 131, 155, 157, 152, 149, 132, 142, 170, 172, 175, 185, 160, 168, 177, 186, 182, 167, 175, 166, 190, 156, 152, 151, 165, 161, 173, 165, 172, 162, 157, 176, 193, 196, 187, 180, 174, 175, 152, 144, 157, 153, 157, 140, 133, 118, 111, 125, 146, 68, 68, 112, 131, 149, 160, 168, 105, 153, 155, 114, 126, 133, 141, 143, 135, 123, 73, 45, 37, 21, 17, 16, 15, 3, 14, 20, 110, 122, 109, 93, 97, 109, 128, 132, 134, 107, 128, 136, 140, 98, 106, 119, 103, 54, 113, 135, 130, 121, 91, 70, 52, 37, 27, 23, 25, 12, 7, 21, 21, 81, 109, 119, 110, 126, 130, 133, 129, 124, 130, 146, 141, 129, 126, 121, 117, 110, 98, 76, 35, 32, 28, 30, 33, 40, 40, 32, 39, 46, 42, 28, 48, 39, 25, 23, 31, 45, 41, 21, 16, 25, 27, 29, 45, 41, 33, 40, 38, 59, 33, 41, 53, 52, 36, 44, 71, 15, 40, 43, 71, 60, 36, 37, 32, 27, 16, 16, 14, 15, 13, 17, 28, 29, 24, 21, 19, 34, 22, 8, 13, 17, 27, 14, 17, 14, 15, 8, 4, 74, 63, 65, 82, 78, 62, 52, 55, 56, 58, 67, 63, 55, 67, 66, 61, 68, 56, 59, 68, 88, 81, 64, 5, 7, 18, 18, 15, 13, 10, 13, 10, 8, 6, 12, 8, 6, 8, 13, 10, 11, 13, 10, 6, 8, 6, 7, 7, 8, 13, 10, 14, 16, 11, 11, 11, 11, 11, 11, 12, 12, 14, 13, 10, 121, 129, 94, 140, 128, 135, 133, 142, 167, 165, 167, 162, 89, 144, 170, 169, 178, 193, 180, 187, 179, 176, 155, 158, 152, 161, 161, 172, 171, 164, 153, 162, 173, 191, 195, 180, 177, 187, 179, 154, 126, 114, 96, 160, 135, 149, 142, 137, 120, 121, 47, 28, 123, 125, 151, 158, 163, 148, 160, 151, 111, 127, 133, 152, 153, 128, 110, 38, 43, 38, 33, 35, 26, 20, 28, 109, 88, 95, 119, 115, 115, 113, 87, 107, 131, 142, 119, 170, 130, 140, 132, 120, 118, 104, 60, 104, 116, 115, 101, 88, 45, 38, 41, 15, 37, 14, 21, 17, 20, 56, 82, 95, 109, 114, 121, 113, 133, 133, 134, 122, 136, 132, 120, 109, 107, 102, 110, 90, 37, 29, 19, 33, 41, 33, 21, 16, 5, 8, 7, 17, 14, 68, 38, 29, 40, 41, 35, 35, 22, 23, 33, 30, 38, 57, 32, 29, 43, 59, 49, 34, 39, 33, 33, 31, 33, 62, 70, 53, 40, 21, 18, 19, 20, 11, 12, 22, 23, 23, 14, 12, 23, 30, 37, 38, 37, 33, 44, 27, 15, 27, 43, 67, 91, 64, 81, 52, 50, 54, 88, 97, 81, 86, 88, 75, 68, 59, 50, 51, 64, 72, 71, 69, 59, 47, 77, 86, 86, 91, 101, 88, 77, 3, 8, 18, 21, 17, 11, 13, 12, 9, 12, 11, 13, 10, 15, 13, 13, 10, 13, 10, 9, 11, 13, 10, 8, 8, 9, 11, 14, 16, 11, 11, 11, 11, 11, 11, 11, 13, 12, 13, 10, 40, 95, 98, 84, 140, 145, 150, 167, 171, 177, 184, 174, 157, 166, 168, 180, 187, 185, 194, 188, 181, 166, 162, 150, 159, 161, 166, 174, 169, 170, 154, 164, 166, 190, 198, 196, 201, 198, 185, 166, 132, 86, 109, 160, 154, 164, 146, 134, 132, 99, 74, 13, 67, 125, 121, 158, 148, 163, 159, 143, 117, 135, 143, 153, 151, 123, 83, 40, 47, 42, 35, 40, 36, 38, 16, 96, 115, 104, 86, 114, 120, 122, 104, 89, 135, 137, 135, 126, 126, 142, 145, 139, 120, 118, 62, 91, 82, 55, 34, 37, 29, 15, 32, 11, 34, 12, 40, 25, 49, 61, 97, 103, 111, 114, 112, 109, 139, 137, 135, 123, 122, 132, 117, 103, 86, 63, 67, 49, 3, 25, 20, 12, 16, 8, 1, 2, 1, 4, 13, 10, 32, 35, 29, 35, 31, 35, 30, 23, 20, 26, 39, 58, 54, 25, 30, 38, 52, 37, 44, 37, 28, 35, 24, 26, 40, 20, 11, 15, 15, 16, 17, 13, 14, 19, 25, 23, 22, 24, 24, 33, 45, 53, 58, 59, 53, 61, 51, 91, 112, 130, 124, 127, 117, 124, 140, 100, 123, 93, 89, 88, 94, 92, 80, 77, 74, 73, 71, 80, 89, 89, 76, 68, 61, 75, 97, 102, 94, 120, 120, 95, 5, 9, 18, 19, 15, 11, 20, 20, 17, 11, 8, 5, 9, 8, 8, 13, 15, 15, 15, 14, 12, 12, 13, 13, 14, 11, 11, 11, 11, 11, 11, 12, 13, 12, 13, 10, 3, 55, 114, 66, 118, 138, 139, 150, 159, 192, 189, 175, 173, 170, 178, 175, 174, 169, 182, 181, 174, 155, 147, 154, 155, 162, 167, 168, 166, 158, 143, 178, 172, 188, 187, 189, 197, 190, 189, 169, 139, 130, 160, 171, 165, 164, 154, 151, 135, 110, 91, 7, 21, 91, 140, 136, 144, 159, 142, 130, 108, 146, 151, 151, 151, 121, 61, 49, 56, 42, 27, 31, 27, 23, 25, 59, 83, 107, 96, 92, 109, 137, 132, 119, 110, 124, 126, 136, 131, 145, 138, 144, 137, 130, 112, 65, 51, 55, 59, 55, 56, 49, 22, 28, 40, 43, 67, 68, 98, 101, 112, 105, 107, 107, 111, 119, 136, 133, 134, 108, 118, 113, 115, 81, 77, 81, 87, 66, 21, 29, 24, 14, 12, 13, 10, 8, 13, 10, 7, 4, 6, 2, 14, 8, 21, 36, 32, 43, 39, 32, 28, 24, 34, 51, 69, 44, 36, 38, 38, 52, 46, 34, 22, 21, 27, 12, 17, 22, 16, 13, 10, 19, 15, 16, 19, 18, 20, 21, 20, 25, 31, 28, 40, 55, 60, 65, 69, 67, 55, 65, 58, 78, 76, 94, 93, 105, 68, 102, 85, 81, 53, 94, 95, 93, 92, 97, 91, 88, 70, 70, 85, 91, 83, 70, 76, 87, 89, 90, 100, 112, 102, 122, 137, 111, 18, 13, 10, 14, 14, 11, 7, 14, 12, 8, 7, 5, 5, 1, 1, 2, 3, 5, 7, 13, 10, 13, 14, 15, 13, 12, 13, 10, 11, 11, 11, 11, 11, 11, 11, 13, 11, 13, 10, 12, 7, 109, 24, 48, 141, 131, 129, 178, 178, 177, 179, 171, 176, 182, 179, 162, 171, 175, 175, 169, 155, 145, 147, 152, 159, 161, 160, 165, 170, 181, 174, 179, 190, 184, 186, 186, 189, 190, 176, 160, 169, 176, 191, 175, 152, 150, 146, 135, 136, 26, 11, 4, 49, 132, 132, 140, 138, 130, 119, 119, 150, 145, 149, 146, 119, 49, 49, 51, 31, 26, 31, 29, 12, 13, 15, 55, 94, 111, 105, 104, 103, 137, 117, 126, 87, 133, 132, 143, 146, 148, 151, 144, 139, 123, 89, 59, 94, 80, 76, 68, 69, 78, 88, 88, 95, 84, 96, 103, 116, 116, 113, 104, 101, 118, 122, 132, 137, 112, 99, 122, 126, 115, 66, 96, 102, 101, 81, 46, 28, 4, 13, 10, 12, 11, 6, 9, 8, 11, 6, 8, 13, 10, 8, 12, 30, 27, 41, 50, 35, 37, 42, 47, 61, 57, 34, 46, 51, 53, 36, 26, 32, 23, 19, 19, 4, 6, 12, 15, 16, 14, 19, 16, 18, 20, 15, 15, 20, 22, 28, 50, 63, 55, 69, 69, 75, 70, 63, 74, 66, 27, 51, 70, 60, 68, 44, 84, 55, 40, 41, 88, 97, 94, 80, 86, 82, 68, 71, 85, 85, 86, 85, 82, 84, 94, 90, 97, 95, 108, 121, 113, 123, 114, 26, 5, 4, 3, 2, 2, 4, 16, 26, 29, 29, 32, 34, 37, 33, 30, 26, 13, 2, 5, 9, 12, 12, 13, 10, 7, 11, 11, 11, 11, 11, 11, 12, 12, 11, 13, 10, 13, 10, 11, 37, 7, 6, 98, 117, 132, 147, 156, 152, 168, 168, 167, 169, 149, 149, 163, 164, 174, 168, 158, 139, 152, 161, 155, 158, 164, 175, 174, 177, 178, 183, 192, 182, 180, 178, 183, 185, 177, 166, 168, 171, 178, 152, 138, 136, 131, 142, 139, 19, 13, 15, 18, 65, 124, 107, 50, 116, 111, 122, 148, 138, 149, 144, 119, 50, 50, 40, 22, 19, 18, 12, 18, 19, 23, 56, 89, 121, 124, 135, 104, 113, 126, 126, 109, 89, 139, 143, 151, 140, 135, 148, 118, 134, 91, 82, 119, 136, 105, 115, 124, 123, 123, 125, 133, 123, 124, 119, 127, 128, 124, 105, 98, 119, 109, 115, 106, 85, 103, 122, 131, 110, 63, 92, 107, 107, 99, 50, 24, 12, 7, 6, 6, 5, 5, 5, 12, 13, 10, 7, 11, 13, 10, 5, 41, 36, 46, 52, 43, 45, 38, 61, 74, 48, 44, 46, 44, 34, 16, 15, 19, 27, 21, 18, 13, 19, 25, 22, 21, 17, 17, 15, 15, 13, 12, 21, 23, 22, 42, 63, 60, 65, 68, 73, 82, 86, 70, 72, 74, 25, 44, 51, 45, 46, 40, 41, 29, 17, 23, 75, 87, 85, 65, 74, 72, 73, 93, 89, 84, 79, 90, 104, 100, 95, 86, 101, 100, 99, 107, 107, 100, 78, 13, 10, 5, 13, 10, 20, 30, 39, 30, 32, 30, 25, 20, 20, 24, 26, 24, 27, 28, 26, 28, 19, 1, 4, 13, 10, 8, 5, 11, 11, 11, 11, 12, 11, 15, 11, 13, 10, 11, 13, 10, 13, 10, 12, 12, 2, 28, 103, 117, 134, 129, 144, 161, 156, 156, 153, 137, 138, 146, 159, 173, 164, 133, 132, 153, 165, 164, 172, 188, 179, 177, 173, 178, 172, 182, 175, 173, 177, 178, 183, 185, 185, 169, 167, 161, 143, 135, 140, 135, 139, 124, 93, 23, 19, 25, 27, 50, 19, 16, 107, 96, 80, 135, 135, 141, 153, 133, 55, 39, 47, 9, 36, 9, 16, 30, 20, 21, 46, 78, 120, 132, 134, 128, 96, 109, 133, 142, 126, 135, 146, 143, 133, 127, 148, 133, 145, 126, 43, 139, 128, 125, 143, 132, 132, 141, 142, 148, 138, 132, 121, 122, 123, 130, 116, 105, 110, 105, 110, 87, 86, 96, 118, 130, 113, 77, 96, 107, 110, 102, 84, 45, 33, 5, 4, 3, 3, 3, 3, 13, 11, 6, 13, 10, 8, 4, 53, 30, 39, 51, 54, 43, 40, 42, 34, 30, 38, 26, 25, 20, 19, 24, 27, 24, 20, 16, 20, 24, 24, 21, 18, 20, 18, 15, 17, 20, 21, 21, 31, 37, 45, 57, 73, 71, 73, 74, 81, 88, 74, 72, 84, 14, 26, 22, 19, 19, 26, 20, 12, 16, 12, 71, 86, 96, 88, 68, 66, 96, 104, 105, 106, 85, 101, 112, 104, 74, 81, 83, 81, 75, 60, 52, 33, 23, 22, 28, 24, 25, 31, 32, 20, 24, 26, 27, 20, 14, 13, 11, 19, 18, 20, 17, 13, 31, 21, 1, 5, 13, 10, 7, 11, 11, 11, 11, 12, 11, 15, 11, 9, 14, 12, 13, 14, 9, 3, 108, 72, 96, 133, 158, 156, 159, 153, 157, 120, 141, 155, 172, 174, 164, 163, 168, 153, 148, 164, 179, 182, 164, 172, 169, 170, 178, 185, 182, 176, 178, 178, 185, 191, 189, 148, 171, 172, 154, 121, 134, 123, 136, 130, 121, 28, 23, 23, 27, 18, 12, 21, 39, 27, 53, 135, 126, 144, 159, 152, 104, 26, 38, 12, 6, 12, 24, 3, 14, 30, 30, 51, 104, 123, 123, 123, 110, 74, 136, 142, 136, 146, 148, 137, 133, 127, 137, 146, 146, 139, 95, 148, 144, 147, 144, 145, 138, 142, 142, 144, 135, 111, 110, 111, 135, 130, 110, 117, 126, 120, 120, 120, 96, 85, 115, 125, 128, 106, 87, 110, 110, 104, 90, 35, 65, 8, 8, 7, 7, 7, 7, 14, 9, 3, 6, 6, 2, 43, 41, 52, 66, 48, 42, 49, 45, 37, 34, 30, 27, 25, 28, 27, 27, 25, 18, 23, 17, 28, 28, 29, 23, 18, 15, 20, 21, 23, 24, 30, 41, 39, 40, 49, 66, 65, 71, 53, 56, 74, 89, 80, 81, 95, 13, 20, 13, 10, 14, 19, 14, 9, 4, 17, 13, 53, 88, 91, 74, 77, 99, 102, 108, 116, 101, 79, 92, 94, 89, 47, 57, 66, 46, 25, 18, 19, 20, 21, 21, 28, 28, 22, 19, 18, 14, 19, 16, 16, 24, 24, 24, 21, 19, 16, 21, 18, 19, 7, 31, 29, 7, 12, 9, 11, 11, 11, 11, 12, 11, 15, 12, 13, 10, 15, 15, 15, 14, 16, 14, 11, 14, 76, 93, 122, 155, 167, 168, 149, 162, 144, 164, 155, 177, 169, 157, 156, 172, 157, 144, 158, 176, 172, 172, 116, 122, 153, 170, 175, 170, 180, 182, 179, 188, 186, 189, 170, 164, 178, 178, 148, 135, 132, 137, 112, 122, 68, 21, 25, 25, 17, 15, 22, 26, 12, 32, 117, 116, 138, 163, 156, 126, 57, 81, 2, 13, 15, 11, 19, 51, 50, 36, 33, 76, 95, 110, 111, 108, 88, 113, 132, 140, 142, 149, 150, 136, 129, 138, 153, 165, 149, 151, 153, 144, 142, 139, 143, 143, 127, 122, 112, 100, 44, 60, 76, 102, 117, 156, 129, 138, 131, 122, 117, 104, 89, 115, 127, 124, 108, 88, 103, 107, 103, 90, 34, 67, 13, 12, 11, 12, 12, 12, 14, 9, 3, 4, 4, 42, 43, 39, 60, 55, 66, 54, 35, 21, 30, 28, 46, 32, 24, 29, 26, 27, 22, 29, 16, 28, 23, 26, 20, 15, 17, 24, 25, 28, 34, 39, 39, 48, 43, 63, 69, 70, 57, 56, 62, 83, 90, 91, 89, 99, 22, 19, 13, 12, 15, 12, 13, 10, 8, 15, 12, 40, 84, 90, 92, 116, 122, 132, 146, 147, 139, 92, 75, 72, 44, 22, 20, 23, 31, 44, 38, 19, 17, 11, 13, 12, 12, 15, 31, 33, 15, 11, 12, 21, 17, 22, 36, 38, 25, 22, 19, 20, 18, 6, 24, 43, 29, 8, 13, 10, 11, 11, 11, 11, 12, 11, 15, 12, 14, 14, 16, 16, 14, 31, 14, 5, 13, 10, 68, 118, 110, 134, 164, 149, 133, 137, 156, 167, 167, 184, 169, 158, 157, 162, 107, 147, 165, 161, 167, 136, 18, 90, 150, 162, 165, 158, 179, 180, 176, 183, 186, 190, 172, 163, 190, 171, 150, 135, 141, 137, 81, 94, 66, 24, 23, 15, 23, 21, 25, 29, 11, 31, 108, 92, 133, 162, 153, 142, 102, 58, 45, 26, 4, 16, 44, 54, 42, 3, 35, 58, 66, 48, 39, 50, 68, 62, 123, 137, 150, 151, 157, 140, 110, 157, 163, 165, 155, 157, 138, 133, 143, 159, 131, 134, 121, 110, 82, 29, 39, 49, 62, 76, 86, 136, 138, 125, 124, 138, 124, 121, 94, 109, 122, 124, 106, 81, 88, 101, 98, 91, 45, 62, 7, 7, 7, 7, 7, 7, 5, 5, 9, 9, 2, 47, 36, 42, 43, 59, 33, 11, 27, 37, 31, 26, 26, 18, 18, 30, 42, 37, 28, 35, 21, 8, 22, 28, 33, 31, 36, 31, 31, 34, 37, 49, 39, 43, 55, 60, 56, 66, 75, 95, 109, 113, 112, 107, 103, 90, 39, 12, 11, 17, 19, 23, 14, 15, 12, 13, 10, 57, 137, 147, 152, 160, 152, 168, 172, 146, 134, 105, 69, 41, 30, 20, 17, 21, 17, 22, 34, 47, 53, 43, 16, 19, 21, 18, 18, 29, 48, 40, 24, 23, 14, 12, 19, 22, 21, 13, 11, 16, 19, 18, 18, 25, 15, 4, 18, 4, 4, 4, 3, 4, 2, 13, 10, 17, 15, 16, 13, 11, 8, 13, 11, 9, 9, 13, 95, 129, 122, 138, 143, 146, 141, 167, 159, 175, 177, 164, 132, 90, 33, 53, 101, 157, 163, 150, 76, 12, 41, 134, 147, 139, 130, 141, 127, 159, 177, 185, 187, 187, 156, 149, 118, 144, 127, 138, 137, 78, 33, 23, 23, 23, 24, 27, 30, 21, 30, 24, 55, 101, 107, 128, 147, 149, 146, 127, 117, 89, 38, 19, 34, 33, 20, 21, 29, 24, 13, 5, 13, 10, 45, 74, 72, 57, 136, 152, 152, 156, 141, 136, 115, 160, 155, 148, 143, 142, 139, 134, 133, 136, 137, 118, 117, 89, 59, 14, 30, 18, 30, 48, 53, 61, 81, 102, 104, 109, 124, 120, 115, 107, 135, 111, 124, 104, 71, 112, 111, 92, 49, 62, 8, 8, 7, 7, 7, 7, 5, 6, 9, 7, 2, 28, 41, 39, 24, 30, 24, 30, 41, 37, 23, 19, 18, 16, 28, 46, 40, 39, 24, 35, 29, 14, 24, 37, 33, 45, 47, 50, 43, 49, 50, 56, 50, 59, 59, 60, 60, 77, 92, 103, 116, 113, 129, 128, 116, 109, 87, 13, 10, 12, 16, 19, 21, 14, 14, 13, 11, 43, 141, 146, 154, 159, 162, 159, 144, 126, 91, 50, 41, 38, 26, 23, 25, 23, 19, 13, 15, 27, 46, 56, 41, 24, 16, 23, 23, 26, 33, 48, 42, 29, 20, 17, 22, 22, 19, 24, 19, 21, 17, 16, 28, 25, 28, 28, 9, 13, 13, 13, 13, 12, 14, 25, 25, 20, 18, 19, 16, 14, 16, 14, 12, 13, 10, 3, 29, 96, 130, 129, 123, 131, 143, 138, 167, 166, 172, 127, 78, 51, 23, 65, 79, 111, 156, 148, 24, 14, 18, 65, 144, 39, 97, 117, 115, 134, 163, 181, 172, 183, 179, 148, 106, 153, 144, 125, 128, 98, 16, 25, 24, 26, 29, 29, 33, 30, 27, 21, 59, 93, 108, 130, 142, 148, 152, 152, 152, 138, 97, 37, 66, 63, 43, 42, 50, 42, 51, 40, 41, 53, 54, 53, 93, 124, 103, 122, 176, 156, 124, 124, 152, 148, 134, 144, 137, 134, 114, 93, 91, 98, 89, 69, 11, 9, 15, 34, 25, 34, 44, 47, 47, 63, 50, 76, 85, 113, 112, 113, 97, 120, 111, 124, 129, 107, 127, 130, 123, 100, 63, 9, 8, 7, 7, 7, 7, 5, 7, 8, 7, 5, 2, 16, 35, 46, 30, 24, 35, 31, 27, 14, 15, 12, 20, 25, 37, 51, 57, 79, 49, 58, 55, 39, 38, 41, 54, 62, 57, 62, 63, 73, 70, 63, 77, 77, 72, 67, 75, 87, 100, 103, 132, 135, 150, 154, 144, 134, 116, 13, 10, 13, 13, 17, 19, 13, 11, 13, 13, 32, 145, 142, 139, 159, 154, 136, 109, 69, 50, 47, 55, 60, 61, 44, 30, 27, 22, 13, 6, 6, 13, 20, 35, 40, 37, 43, 30, 28, 22, 24, 34, 45, 35, 30, 32, 32, 27, 26, 27, 37, 31, 17, 35, 26, 30, 35, 11, 18, 18, 18, 20, 19, 18, 28, 31, 29, 27, 24, 20, 18, 20, 18, 15, 13, 10, 13, 6, 12, 105, 124, 132, 104, 122, 100, 140, 156, 140, 96, 57, 45, 29, 42, 52, 3, 105, 80, 18, 11, 22, 33, 55, 18, 26, 27, 58, 90, 152, 140, 166, 162, 164, 158, 147, 126, 160, 124, 125, 113, 19, 22, 28, 27, 31, 31, 30, 34, 35, 25, 49, 100, 97, 124, 138, 152, 150, 158, 156, 152, 142, 135, 135, 123, 117, 104, 84, 66, 50, 56, 83, 87, 109, 122, 115, 120, 130, 161, 163, 168, 158, 133, 140, 132, 135, 146, 142, 126, 71, 80, 106, 100, 92, 65, 18, 5, 13, 42, 39, 40, 41, 35, 25, 44, 49, 56, 42, 53, 98, 110, 97, 101, 112, 128, 138, 134, 142, 136, 134, 128, 84, 11, 9, 7, 7, 7, 7, 7, 7, 7, 6, 5, 3, 13, 10, 35, 38, 23, 23, 29, 31, 25, 17, 18, 17, 30, 42, 58, 81, 97, 92, 47, 63, 83, 55, 67, 52, 55, 61, 56, 68, 72, 75, 80, 82, 90, 83, 84, 87, 87, 91, 102, 109, 141, 147, 158, 150, 141, 139, 111, 8, 7, 18, 17, 17, 12, 9, 11, 16, 37, 139, 146, 138, 147, 127, 68, 40, 22, 20, 21, 30, 50, 72, 77, 58, 39, 31, 20, 11, 6, 4, 7, 20, 23, 40, 68, 72, 46, 13, 16, 29, 45, 43, 52, 52, 41, 47, 35, 28, 27, 61, 19, 30, 28, 30, 26, 13, 9, 9, 9, 9, 13, 10, 9, 16, 24, 29, 29, 28, 23, 23, 19, 17, 16, 18, 15, 14, 15, 29, 140, 144, 101, 125, 73, 128, 138, 108, 45, 4, 33, 21, 40, 20, 6, 25, 14, 20, 19, 17, 23, 25, 24, 30, 34, 21, 17, 41, 25, 156, 148, 85, 145, 162, 131, 73, 48, 64, 49, 21, 23, 22, 29, 33, 35, 28, 25, 39, 24, 17, 92, 106, 120, 132, 150, 155, 161, 160, 165, 166, 161, 142, 154, 135, 130, 122, 116, 118, 133, 126, 135, 139, 142, 127, 140, 115, 154, 157, 161, 153, 121, 132, 127, 133, 145, 142, 135, 72, 103, 122, 120, 122, 113, 69, 13, 10, 49, 66, 69, 72, 55, 48, 39, 32, 38, 32, 64, 23, 39, 98, 73, 92, 109, 128, 136, 137, 140, 141, 144, 136, 136, 13, 11, 9, 5, 6, 6, 9, 8, 6, 5, 3, 3, 3, 32, 32, 20, 30, 31, 25, 21, 19, 19, 12, 37, 82, 110, 109, 109, 91, 64, 71, 89, 60, 67, 62, 54, 72, 64, 70, 68, 66, 74, 82, 83, 89, 91, 96, 93, 95, 102, 122, 133, 135, 137, 141, 143, 137, 101, 13, 6, 20, 17, 13, 14, 8, 13, 16, 23, 135, 135, 139, 125, 60, 29, 25, 15, 15, 16, 24, 32, 39, 67, 80, 80, 43, 32, 21, 18, 11, 8, 17, 28, 34, 63, 57, 92, 17, 25, 16, 44, 45, 52, 62, 76, 44, 39, 43, 40, 60, 16, 28, 37, 14, 21, 17, 1, 3, 6, 17, 9, 3, 2, 8, 13, 20, 20, 25, 20, 11, 14, 15, 13, 11, 11, 13, 16, 31, 71, 28, 27, 18, 131, 109, 25, 19, 16, 12, 2, 12, 15, 15, 26, 27, 20, 18, 21, 28, 27, 27, 25, 27, 25, 23, 20, 13, 10, 124, 138, 121, 58, 120, 114, 24, 25, 19, 21, 22, 23, 29, 31, 28, 35, 24, 29, 30, 19, 21, 93, 96, 104, 119, 138, 152, 154, 170, 176, 177, 176, 165, 152, 148, 141, 138, 131, 149, 130, 141, 138, 148, 147, 141, 134, 139, 150, 157, 158, 104, 115, 115, 129, 134, 142, 142, 141, 70, 121, 124, 134, 134, 131, 97, 29, 79, 80, 85, 88, 65, 34, 72, 20, 2, 14, 24, 40, 85, 71, 95, 109, 126, 139, 138, 132, 149, 150, 91, 152, 15, 13, 11, 8, 8, 8, 9, 9, 6, 4, 4, 7, 9, 18, 31, 28, 41, 52, 15, 4, 2, 3, 29, 93, 99, 110, 122, 92, 55, 85, 81, 57, 77, 74, 72, 75, 64, 68, 69, 69, 75, 73, 77, 84, 93, 101, 94, 87, 118, 125, 146, 133, 134, 141, 141, 139, 114, 12, 9, 12, 17, 16, 13, 6, 14, 17, 21, 117, 125, 116, 58, 27, 25, 23, 19, 15, 18, 26, 27, 31, 31, 46, 82, 94, 85, 51, 28, 22, 29, 31, 32, 32, 46, 54, 77, 83, 37, 21, 16, 31, 41, 37, 85, 75, 26, 24, 14, 22, 21, 24, 17, 13, 26, 35, 21, 31, 39, 44, 35, 35, 36, 45, 31, 25, 7, 3, 3, 6, 12, 13, 14, 13, 14, 24, 23, 22, 23, 20, 17, 88, 31, 18, 28, 29, 28, 22, 28, 34, 29, 30, 24, 20, 21, 21, 29, 33, 33, 31, 32, 27, 26, 26, 22, 52, 101, 3, 24, 21, 27, 27, 19, 24, 26, 28, 36, 35, 29, 22, 30, 29, 28, 16, 69, 97, 99, 117, 137, 162, 161, 158, 179, 171, 173, 168, 138, 131, 137, 136, 131, 102, 76, 98, 122, 131, 141, 145, 144, 151, 145, 149, 137, 75, 85, 106, 124, 118, 136, 140, 132, 103, 108, 124, 132, 131, 119, 101, 19, 85, 100, 122, 123, 108, 87, 92, 66, 15, 1, 18, 15, 17, 95, 97, 114, 124, 133, 126, 121, 135, 147, 144, 131, 160, 16, 15, 13, 11, 13, 10, 9, 13, 10, 8, 4, 3, 4, 9, 12, 6, 25, 29, 40, 18, 4, 12, 8, 5, 8, 5, 20, 32, 49, 40, 24, 20, 45, 84, 71, 75, 68, 60, 78, 84, 83, 86, 86, 90, 90, 84, 69, 95, 104, 115, 133, 145, 144, 146, 150, 143, 139, 140, 135, 124, 20, 8, 14, 16, 16, 12, 5, 12, 18, 16, 116, 112, 52, 22, 20, 33, 28, 18, 20, 20, 23, 27, 23, 24, 20, 31, 53, 78, 87, 41, 38, 50, 59, 47, 39, 33, 62, 37, 89, 62, 55, 25, 19, 24, 26, 18, 21, 14, 16, 15, 35, 18, 14, 16, 23, 20, 26, 24, 29, 26, 18, 21, 29, 23, 28, 28, 38, 46, 36, 29, 3, 12, 13, 16, 15, 22, 12, 22, 24, 17, 14, 13, 24, 25, 22, 24, 23, 23, 27, 26, 32, 35, 32, 30, 27, 24, 23, 30, 37, 37, 35, 34, 32, 30, 31, 32, 21, 23, 30, 15, 13, 10, 20, 30, 31, 26, 15, 21, 23, 26, 36, 30, 27, 21, 28, 28, 31, 20, 70, 94, 98, 98, 140, 155, 160, 154, 180, 167, 165, 160, 139, 133, 144, 138, 109, 71, 47, 50, 79, 106, 129, 140, 141, 141, 142, 141, 152, 145, 136, 112, 128, 111, 135, 145, 135, 122, 95, 115, 126, 123, 107, 102, 17, 57, 98, 122, 136, 134, 124, 110, 104, 40, 31, 24, 11, 17, 65, 113, 132, 147, 131, 112, 104, 133, 150, 142, 157, 158, 15, 14, 12, 11, 9, 7, 9, 7, 2, 1, 4, 11, 14, 6, 11, 16, 4, 11, 16, 14, 11, 7, 1, 6, 6, 9, 12, 8, 6, 9, 63, 52, 52, 55, 74, 83, 88, 95, 106, 104, 98, 90, 76, 62, 81, 123, 146, 157, 157, 153, 153, 153, 150, 148, 154, 150, 139, 36, 6, 11, 14, 11, 13, 10, 6, 11, 15, 11, 90, 71, 30, 21, 21, 40, 37, 27, 30, 29, 33, 24, 21, 11, 13, 10, 8, 22, 53, 106, 74, 43, 63, 126, 89, 43, 43, 54, 40, 53, 103, 29, 13, 10, 13, 10, 12, 13, 25, 24, 11, 8, 25, 26, 11, 15, 25, 15, 13, 10, 22, 27, 16, 13, 10, 14, 26, 21, 19, 17, 26, 26, 26, 39, 43, 50, 24, 3, 12, 16, 16, 29, 21, 24, 21, 22, 20, 17, 28, 27, 22, 12, 8, 8, 13, 10, 15, 26, 32, 34, 38, 38, 29, 32, 36, 38, 38, 36, 34, 36, 35, 37, 40, 32, 41, 38, 32, 34, 25, 27, 30, 22, 15, 21, 23, 29, 38, 30, 30, 27, 26, 27, 22, 18, 71, 81, 96, 135, 156, 159, 170, 137, 160, 155, 152, 150, 143, 143, 161, 157, 100, 42, 21, 42, 46, 74, 107, 127, 130, 122, 128, 121, 155, 149, 144, 133, 119, 106, 133, 137, 144, 136, 92, 92, 117, 125, 110, 86, 33, 40, 79, 115, 138, 145, 137, 113, 102, 48, 43, 25, 3, 3, 62, 135, 140, 150, 129, 78, 90, 103, 128, 137, 155, 161, 13, 10, 14, 13, 10, 9, 9, 9, 14, 11, 6, 4, 5, 8, 13, 10, 7, 8, 12, 5, 9, 12, 11, 13, 10, 8, 8, 7, 6, 7, 11, 13, 8, 11, 3, 63, 44, 48, 56, 66, 68, 96, 103, 102, 96, 80, 44, 11, 16, 87, 139, 145, 152, 163, 162, 153, 158, 154, 151, 151, 148, 139, 52, 11, 11, 11, 13, 10, 11, 7, 11, 15, 4, 64, 30, 17, 22, 37, 44, 46, 40, 52, 52, 35, 25, 16, 23, 25, 20, 26, 43, 72, 97, 40, 51, 108, 95, 40, 51, 42, 26, 29, 30, 27, 23, 13, 10, 20, 33, 41, 15, 15, 15, 36, 12, 18, 15, 37, 17, 14, 27, 27, 19, 11, 24, 24, 19, 18, 25, 28, 18, 23, 28, 23, 31, 49, 18, 5, 13, 19, 24, 19, 20, 21, 19, 21, 13, 26, 25, 23, 16, 14, 15, 19, 18, 28, 25, 31, 36, 35, 35, 36, 38, 34, 38, 33, 36, 37, 36, 40, 37, 37, 36, 35, 32, 28, 29, 29, 22, 16, 17, 25, 24, 33, 38, 33, 33, 32, 27, 25, 20, 18, 90, 87, 91, 146, 178, 175, 135, 108, 135, 129, 139, 158, 148, 140, 144, 125, 69, 48, 29, 43, 46, 41, 59, 60, 103, 108, 95, 112, 155, 145, 147, 150, 146, 126, 118, 138, 144, 136, 124, 85, 118, 125, 119, 94, 38, 39, 48, 100, 128, 148, 151, 130, 119, 84, 54, 40, 7, 26, 55, 120, 129, 128, 124, 87, 98, 97, 127, 139, 155, 172, 12, 3, 4, 7, 5, 4, 12, 9, 5, 5, 4, 5, 6, 7, 8, 13, 10, 13, 10, 13, 10, 13, 10, 13, 13, 13, 11, 13, 10, 13, 10, 12, 14, 14, 13, 9, 5, 49, 51, 47, 67, 70, 76, 84, 77, 52, 30, 14, 2, 3, 3, 26, 107, 135, 144, 153, 157, 155, 158, 157, 166, 162, 140, 116, 61, 15, 7, 8, 11, 15, 8, 7, 13, 5, 38, 26, 20, 22, 32, 47, 53, 57, 70, 89, 65, 36, 27, 46, 46, 50, 37, 29, 38, 65, 40, 36, 77, 48, 27, 34, 29, 12, 20, 27, 37, 19, 12, 24, 45, 41, 15, 16, 25, 36, 11, 24, 31, 47, 22, 21, 31, 18, 18, 12, 26, 23, 22, 19, 27, 22, 19, 21, 24, 17, 18, 39, 46, 27, 12, 19, 18, 20, 20, 20, 18, 22, 18, 23, 28, 21, 22, 24, 27, 29, 31, 31, 27, 32, 33, 33, 39, 37, 37, 35, 39, 34, 37, 37, 37, 40, 40, 38, 33, 32, 28, 28, 27, 23, 23, 16, 18, 24, 22, 30, 35, 35, 34, 31, 29, 25, 22, 22, 107, 95, 92, 162, 173, 140, 115, 120, 123, 112, 133, 160, 155, 136, 128, 89, 56, 44, 41, 45, 45, 46, 54, 53, 16, 15, 13, 38, 87, 110, 119, 149, 160, 148, 122, 134, 146, 139, 134, 132, 107, 128, 129, 108, 42, 77, 49, 101, 124, 145, 152, 138, 125, 99, 80, 56, 21, 34, 67, 104, 126, 133, 123, 95, 106, 99, 126, 139, 152, 161, 46, 29, 11, 5, 2, 2, 5, 8, 8, 7, 6, 7, 9, 7, 7, 6, 9, 9, 9, 12, 12, 12, 11, 11, 13, 14, 16, 17, 16, 11, 6, 23, 57, 44, 37, 26, 27, 14, 9, 2, 4, 5, 8, 13, 10, 12, 3, 29, 97, 131, 135, 141, 162, 164, 165, 154, 147, 137, 123, 77, 4, 5, 7, 13, 10, 14, 13, 10, 8, 7, 2, 37, 24, 21, 21, 18, 41, 54, 81, 93, 127, 124, 96, 51, 58, 41, 67, 32, 33, 40, 32, 39, 35, 39, 26, 36, 39, 17, 21, 24, 44, 46, 17, 14, 25, 59, 44, 20, 17, 34, 34, 14, 16, 35, 32, 22, 18, 29, 16, 16, 18, 20, 20, 20, 22, 29, 20, 20, 22, 24, 19, 17, 26, 41, 55, 31, 6, 18, 18, 17, 17, 21, 26, 21, 25, 28, 25, 27, 29, 32, 35, 33, 28, 33, 35, 34, 35, 39, 37, 34, 38, 40, 36, 39, 38, 39, 40, 41, 38, 32, 30, 28, 28, 27, 23, 23, 20, 21, 22, 22, 26, 32, 37, 34, 28, 29, 27, 25, 25, 104, 103, 89, 124, 113, 117, 122, 120, 138, 105, 134, 153, 160, 141, 106, 66, 52, 30, 31, 23, 44, 34, 47, 62, 51, 57, 34, 94, 113, 107, 110, 135, 147, 140, 116, 133, 145, 146, 152, 134, 86, 130, 138, 129, 63, 58, 25, 66, 111, 129, 141, 138, 129, 96, 79, 65, 43, 19, 89, 99, 126, 125, 115, 101, 108, 117, 130, 137, 152, 155, 51, 56, 47, 31, 23, 9, 5, 1, 1, 6, 9, 11, 11, 9, 9, 9, 9, 9, 9, 12, 12, 12, 13, 13, 13, 14, 16, 18, 18, 16, 12, 8, 14, 15, 2, 3, 6, 7, 8, 9, 9, 9, 13, 10, 11, 9, 13, 10, 3, 19, 67, 114, 115, 151, 156, 165, 157, 136, 117, 108, 85, 3, 5, 6, 4, 6, 9, 9, 4, 25, 41, 11, 24, 26, 32, 53, 75, 88, 96, 128, 141, 134, 102, 58, 39, 54, 25, 39, 30, 35, 39, 42, 31, 20, 44, 23, 19, 21, 31, 61, 50, 18, 15, 25, 64, 48, 23, 23, 36, 37, 16, 21, 35, 23, 19, 41, 34, 19, 15, 26, 17, 19, 17, 28, 33, 23, 20, 22, 22, 18, 18, 25, 32, 39, 57, 16, 13, 17, 18, 17, 24, 27, 23, 29, 30, 31, 30, 28, 26, 30, 27, 28, 33, 32, 32, 34, 34, 34, 29, 37, 40, 39, 40, 38, 40, 40, 37, 36, 32, 31, 29, 28, 28, 26, 20, 21, 24, 23, 24, 28, 27, 36, 33, 28, 27, 28, 27, 25, 46, 71, 84, 105, 104, 111, 134, 111, 112, 117, 139, 151, 160, 138, 82, 50, 22, 3, 25, 18, 33, 60, 87, 114, 108, 76, 102, 118, 124, 133, 108, 132, 137, 125, 131, 145, 150, 154, 149, 85, 135, 137, 138, 113, 34, 27, 47, 86, 113, 120, 129, 111, 66, 55, 46, 33, 86, 110, 135, 120, 115, 112, 111, 108, 130, 133, 133, 149, 154, 44, 42, 43, 42, 47, 44, 44, 20, 1, 6, 11, 13, 13, 11, 12, 13, 15, 16, 15, 18, 18, 18, 17, 15, 14, 13, 15, 16, 16, 15, 15, 9, 11, 7, 8, 8, 11, 11, 9, 13, 10, 9, 13, 10, 6, 5, 7, 9, 4, 15, 9, 77, 111, 147, 151, 154, 155, 123, 66, 27, 22, 12, 17, 2, 3, 2, 8, 35, 42, 13, 10, 22, 40, 62, 67, 66, 63, 74, 121, 131, 141, 122, 94, 37, 18, 22, 34, 23, 37, 22, 30, 21, 34, 39, 11, 19, 22, 38, 73, 49, 19, 13, 24, 65, 54, 24, 26, 35, 41, 17, 18, 25, 18, 16, 32, 30, 18, 18, 34, 20, 18, 18, 32, 35, 24, 20, 23, 19, 18, 17, 15, 19, 35, 39, 36, 13, 18, 21, 23, 23, 21, 26, 31, 37, 32, 31, 26, 19, 23, 28, 33, 29, 28, 29, 32, 29, 32, 27, 35, 39, 40, 39, 38, 40, 38, 32, 32, 33, 32, 30, 30, 28, 23, 21, 21, 26, 25, 28, 32, 24, 33, 32, 29, 25, 29, 29, 24, 22, 80, 88, 109, 104, 113, 98, 104, 100, 133, 139, 154, 162, 132, 79, 30, 13, 16, 13, 20, 25, 81, 113, 134, 132, 112, 94, 119, 130, 146, 118, 115, 134, 129, 121, 147, 152, 154, 154, 125, 123, 129, 144, 141, 55, 38, 52, 46, 63, 104, 120, 104, 70, 64, 52, 59, 109, 119, 126, 116, 126, 119, 110, 108, 129, 134, 137, 142, 142, 39, 40, 38, 38, 38, 40, 40, 33, 13, 10, 3, 11, 14, 15, 14, 12, 14, 15, 18, 15, 17, 17, 17, 17, 16, 15, 13, 11, 12, 11, 13, 10, 13, 10, 8, 6, 7, 8, 13, 10, 8, 8, 5, 5, 3, 2, 6, 5, 7, 7, 98, 116, 133, 144, 116, 138, 69, 4, 1, 23, 46, 51, 47, 19, 6, 5, 5, 29, 41, 44, 12, 23, 55, 68, 46, 37, 35, 66, 82, 89, 95, 83, 88, 33, 18, 18, 19, 19, 23, 19, 22, 25, 53, 33, 14, 17, 22, 47, 85, 46, 18, 15, 27, 68, 64, 27, 30, 35, 59, 21, 16, 20, 29, 19, 29, 26, 22, 28, 28, 29, 30, 26, 31, 42, 32, 30, 27, 27, 20, 21, 20, 21, 26, 31, 31, 16, 18, 21, 26, 21, 21, 26, 31, 35, 34, 33, 28, 22, 24, 24, 30, 28, 29, 30, 30, 31, 30, 32, 38, 40, 38, 36, 36, 37, 35, 31, 28, 31, 31, 25, 26, 31, 21, 20, 24, 28, 28, 34, 30, 25, 30, 30, 29, 31, 31, 29, 25, 9, 72, 78, 103, 102, 112, 104, 105, 115, 136, 142, 152, 162, 148, 89, 14, 13, 36, 13, 10, 17, 38, 43, 111, 134, 142, 149, 129, 100, 89, 131, 143, 134, 126, 132, 132, 118, 141, 162, 165, 164, 157, 135, 149, 141, 142, 117, 32, 13, 25, 37, 60, 113, 102, 65, 125, 113, 129, 117, 130, 119, 122, 126, 113, 113, 106, 131, 138, 138, 144, 141, 42, 40, 37, 37, 34, 35, 30, 27, 36, 3, 9, 11, 14, 16, 16, 16, 13, 9, 8, 11, 11, 11, 9, 8, 7, 8, 9, 13, 10, 9, 5, 6, 6, 5, 7, 9, 13, 10, 6, 4, 2, 2, 2, 1, 7, 8, 13, 10, 11, 13, 46, 123, 105, 25, 40, 9, 1, 30, 44, 47, 63, 46, 29, 37, 28, 35, 27, 53, 44, 16, 28, 59, 64, 29, 31, 28, 47, 37, 61, 73, 62, 23, 20, 21, 16, 19, 18, 12, 19, 21, 50, 61, 23, 16, 20, 27, 56, 98, 48, 21, 22, 32, 66, 80, 26, 34, 39, 57, 18, 22, 22, 25, 26, 28, 29, 25, 43, 38, 31, 47, 28, 37, 55, 51, 37, 29, 23, 26, 30, 24, 23, 23, 23, 29, 20, 22, 23, 23, 23, 20, 34, 31, 32, 37, 32, 28, 23, 26, 24, 28, 29, 29, 30, 30, 28, 25, 31, 40, 43, 38, 33, 35, 33, 32, 26, 27, 23, 27, 23, 24, 16, 18, 12, 24, 27, 33, 34, 28, 23, 30, 35, 28, 35, 31, 31, 29, 13, 10, 37, 82, 97, 101, 109, 112, 110, 113, 144, 136, 147, 164, 158, 126, 40, 2, 13, 10, 7, 4, 52, 69, 123, 143, 154, 145, 140, 120, 59, 86, 99, 122, 135, 121, 147, 141, 110, 157, 164, 175, 154, 154, 157, 142, 137, 129, 38, 32, 91, 143, 110, 142, 133, 157, 155, 137, 136, 132, 136, 124, 125, 113, 115, 121, 109, 131, 140, 146, 131, 126, 53, 47, 42, 40, 35, 34, 19, 25, 39, 28, 4, 8, 12, 16, 17, 16, 9, 5, 5, 8, 8, 8, 6, 5, 6, 7, 13, 10, 11, 9, 6, 6, 6, 8, 11, 14, 14, 13, 10, 5, 4, 5, 5, 6, 6, 8, 8, 6, 8, 11, 16, 15, 22, 37, 37, 26, 27, 20, 6, 56, 36, 63, 30, 25, 45, 28, 26, 39, 26, 64, 35, 22, 27, 62, 53, 20, 31, 25, 36, 48, 33, 59, 55, 18, 16, 20, 17, 18, 16, 15, 18, 25, 70, 56, 20, 18, 23, 30, 66, 108, 56, 26, 24, 35, 66, 86, 35, 38, 41, 48, 40, 28, 36, 27, 34, 31, 45, 56, 54, 46, 42, 54, 38, 39, 65, 76, 45, 39, 44, 32, 37, 31, 26, 27, 23, 26, 21, 26, 26, 26, 23, 17, 32, 30, 29, 35, 32, 29, 25, 24, 26, 25, 29, 30, 31, 32, 31, 24, 27, 34, 35, 34, 32, 34, 32, 28, 25, 32, 25, 28, 24, 26, 21, 23, 14, 18, 27, 34, 32, 32, 24, 31, 34, 29, 27, 32, 33, 27, 12, 4, 83, 89, 109, 112, 103, 105, 111, 148, 142, 140, 150, 163, 160, 75, 45, 32, 2, 9, 40, 83, 127, 141, 149, 150, 128, 113, 70, 78, 95, 96, 137, 128, 126, 146, 130, 162, 150, 158, 158, 158, 147, 153, 159, 92, 30, 144, 152, 147, 142, 157, 155, 149, 148, 142, 141, 148, 135, 121, 111, 104, 118, 116, 111, 129, 146, 141, 132, 134, 59, 53, 48, 44, 37, 34, 22, 26, 41, 44, 11, 13, 13, 10, 15, 16, 14, 5, 5, 5, 9, 9, 9, 7, 7, 8, 13, 10, 11, 12, 11, 13, 10, 9, 7, 13, 16, 18, 18, 13, 7, 7, 8, 13, 10, 12, 13, 14, 15, 5, 7, 11, 12, 18, 20, 16, 25, 30, 29, 21, 39, 48, 39, 41, 22, 40, 39, 22, 44, 32, 33, 73, 27, 29, 30, 67, 41, 20, 21, 20, 21, 40, 32, 34, 42, 26, 26, 20, 18, 18, 14, 21, 19, 32, 80, 44, 23, 18, 23, 32, 68, 113, 64, 33, 27, 40, 70, 85, 46, 35, 46, 45, 59, 48, 44, 26, 41, 50, 63, 83, 68, 67, 48, 38, 35, 37, 92, 95, 40, 30, 37, 25, 37, 31, 24, 24, 24, 29, 22, 29, 31, 30, 26, 26, 23, 27, 28, 31, 32, 29, 26, 23, 29, 25, 29, 30, 31, 32, 35, 32, 32, 36, 33, 37, 33, 34, 35, 33, 30, 33, 30, 31, 26, 28, 29, 23, 13, 9, 26, 32, 33, 30, 28, 33, 31, 31, 28, 30, 27, 20, 7, 4, 49, 71, 99, 110, 94, 98, 106, 139, 156, 132, 128, 165, 171, 86, 49, 20, 14, 28, 64, 84, 109, 139, 139, 116, 60, 55, 43, 74, 104, 104, 137, 142, 127, 143, 148, 149, 159, 161, 166, 162, 149, 146, 160, 142, 40, 150, 154, 161, 158, 164, 164, 149, 152, 143, 138, 140, 132, 105, 111, 100, 114, 106, 111, 136, 143, 139, 135, 129, 58, 54, 53, 52, 52, 53, 41, 35, 39, 34, 12, 5, 17, 13, 20, 26, 18, 11, 9, 19, 18, 14, 11, 7, 7, 8, 13, 10, 13, 15, 14, 14, 14, 11, 13, 10, 9, 9, 9, 9, 8, 8, 8, 7, 6, 6, 6, 5, 5, 12, 15, 18, 18, 20, 28, 40, 33, 25, 41, 23, 53, 33, 29, 50, 29, 37, 70, 32, 32, 71, 18, 17, 44, 72, 26, 12, 13, 28, 42, 32, 35, 42, 57, 82, 84, 39, 30, 20, 19, 28, 28, 50, 70, 34, 17, 16, 30, 45, 72, 126, 90, 37, 23, 41, 53, 73, 86, 51, 39, 53, 69, 87, 71, 49, 44, 44, 82, 57, 28, 40, 20, 18, 18, 24, 48, 42, 20, 21, 24, 25, 17, 18, 22, 35, 30, 23, 30, 32, 29, 26, 25, 23, 8, 34, 31, 33, 38, 33, 28, 25, 28, 29, 31, 33, 34, 34, 37, 38, 38, 36, 32, 32, 35, 38, 35, 31, 32, 34, 35, 36, 36, 33, 31, 23, 11, 12, 24, 33, 35, 32, 34, 25, 25, 18, 16, 16, 16, 16, 17, 17, 15, 17, 79, 106, 106, 119, 106, 134, 158, 139, 119, 136, 153, 156, 150, 91, 32, 31, 65, 59, 72, 94, 119, 77, 49, 37, 37, 70, 105, 98, 129, 141, 140, 136, 160, 159, 161, 170, 168, 158, 149, 133, 141, 146, 128, 141, 145, 162, 161, 162, 156, 152, 154, 147, 138, 123, 116, 86, 100, 97, 106, 104, 121, 136, 143, 134, 139, 131, 57, 58, 58, 55, 54, 54, 44, 35, 41, 40, 45, 13, 10, 12, 4, 15, 17, 17, 13, 11, 13, 10, 11, 9, 9, 7, 7, 9, 13, 10, 13, 10, 11, 17, 17, 17, 13, 11, 8, 9, 9, 9, 8, 8, 8, 7, 6, 6, 6, 5, 5, 12, 17, 20, 21, 18, 32, 46, 34, 50, 51, 23, 45, 26, 41, 40, 27, 55, 57, 30, 44, 78, 21, 16, 43, 66, 19, 19, 15, 34, 42, 51, 52, 31, 53, 77, 96, 62, 47, 34, 44, 42, 56, 73, 63, 29, 19, 18, 31, 46, 97, 142, 99, 44, 30, 46, 51, 61, 99, 52, 48, 47, 56, 88, 73, 48, 45, 48, 36, 24, 18, 18, 19, 16, 14, 21, 50, 38, 24, 20, 14, 20, 32, 21, 18, 13, 21, 18, 22, 22, 26, 34, 38, 49, 42, 34, 28, 18, 21, 23, 23, 23, 27, 29, 31, 35, 34, 31, 29, 35, 39, 38, 36, 35, 38, 38, 32, 35, 25, 27, 38, 40, 36, 33, 26, 14, 11, 13, 10, 17, 22, 35, 31, 31, 20, 11, 8, 12, 13, 13, 14, 17, 17, 14, 12, 56, 94, 103, 108, 125, 133, 144, 139, 123, 133, 163, 160, 160, 156, 98, 63, 70, 55, 59, 73, 96, 39, 43, 38, 13, 10, 25, 63, 52, 79, 139, 143, 137, 154, 150, 153, 167, 160, 160, 155, 143, 141, 156, 145, 133, 145, 159, 165, 160, 155, 149, 151, 138, 130, 127, 116, 111, 97, 100, 100, 101, 113, 131, 133, 130, 125, 129, 58, 61, 61, 56, 46, 50, 48, 16, 9, 45, 57, 36, 25, 2, 4, 12, 13, 10, 9, 3, 6, 2, 5, 7, 8, 13, 10, 11, 13, 10, 13, 10, 9, 12, 12, 12, 14, 11, 8, 8, 8, 8, 8, 8, 8, 8, 7, 7, 7, 5, 5, 12, 20, 23, 24, 22, 27, 41, 34, 32, 45, 27, 37, 27, 55, 29, 34, 69, 31, 27, 62, 86, 28, 14, 36, 59, 20, 21, 26, 85, 102, 52, 62, 32, 26, 40, 57, 60, 63, 63, 67, 65, 74, 67, 44, 25, 16, 19, 29, 47, 122, 156, 100, 50, 43, 55, 41, 55, 90, 70, 29, 33, 58, 101, 59, 38, 29, 19, 13, 20, 21, 26, 22, 18, 12, 11, 24, 41, 23, 18, 15, 16, 30, 33, 19, 16, 16, 15, 27, 25, 19, 18, 26, 33, 34, 16, 30, 36, 34, 40, 44, 43, 30, 20, 20, 30, 34, 30, 25, 29, 32, 37, 37, 36, 36, 40, 42, 39, 28, 28, 34, 38, 32, 32, 21, 11, 12, 13, 10, 11, 12, 17, 21, 15, 7, 9, 9, 9, 13, 10, 13, 10, 12, 18, 17, 14, 13, 10, 28, 78, 97, 93, 126, 129, 139, 143, 130, 144, 175, 162, 162, 155, 153, 92, 82, 85, 46, 38, 53, 15, 29, 25, 13, 10, 19, 27, 21, 130, 153, 149, 153, 157, 164, 172, 172, 174, 160, 152, 149, 148, 136, 128, 146, 158, 159, 159, 153, 145, 137, 129, 128, 144, 132, 126, 90, 95, 100, 101, 101, 119, 124, 126, 118, 127, 59, 60, 55, 50, 47, 52, 55, 32, 30, 36, 57, 54, 52, 37, 17, 3, 7, 3, 17, 33, 36, 37, 12, 9, 11, 12, 11, 12, 12, 13, 13, 13, 13, 12, 11, 7, 7, 7, 8, 8, 8, 8, 8, 8, 8, 5, 5, 12, 22, 25, 26, 22, 28, 32, 31, 19, 23, 27, 35, 37, 59, 25, 51, 77, 13, 29, 82, 81, 33, 20, 42, 51, 28, 32, 21, 42, 85, 60, 80, 24, 23, 26, 26, 37, 47, 54, 48, 51, 50, 40, 28, 21, 22, 20, 28, 46, 119, 141, 86, 61, 52, 46, 45, 55, 73, 90, 35, 61, 58, 58, 43, 39, 20, 22, 19, 21, 28, 32, 21, 18, 19, 16, 15, 29, 45, 21, 18, 22, 25, 26, 28, 32, 32, 29, 26, 22, 20, 22, 31, 31, 27, 14, 18, 29, 35, 40, 42, 52, 48, 33, 11, 7, 9, 18, 17, 24, 32, 32, 36, 33, 35, 42, 36, 32, 33, 35, 33, 34, 20, 19, 15, 11, 9, 11, 11, 13, 10, 13, 10, 11, 11, 6, 9, 13, 10, 8, 8, 8, 11, 18, 17, 13, 11, 8, 51, 84, 93, 119, 128, 131, 142, 140, 143, 173, 176, 174, 166, 154, 148, 135, 129, 75, 45, 47, 31, 34, 39, 57, 2, 3, 13, 7, 135, 159, 156, 162, 166, 177, 178, 173, 179, 165, 149, 140, 144, 135, 135, 153, 156, 159, 157, 152, 141, 138, 138, 138, 143, 139, 132, 112, 106, 106, 89, 92, 102, 114, 122, 124, 127, 55, 56, 50, 46, 50, 50, 61, 60, 48, 44, 49, 54, 58, 63, 56, 13, 10, 50, 43, 48, 29, 13, 10, 9, 13, 11, 15, 18, 8, 13, 13, 15, 14, 13, 9, 9, 9, 9, 7, 7, 7, 7, 7, 8, 9, 7, 8, 9, 13, 20, 26, 25, 29, 31, 27, 18, 4, 25, 37, 51, 26, 68, 74, 11, 34, 111, 62, 41, 22, 49, 47, 18, 34, 52, 64, 74, 47, 28, 36, 26, 21, 22, 20, 22, 19, 25, 26, 25, 27, 24, 22, 22, 28, 34, 42, 135, 129, 97, 73, 43, 42, 41, 42, 73, 71, 30, 23, 34, 47, 41, 47, 19, 38, 21, 22, 30, 39, 21, 17, 35, 23, 23, 23, 49, 48, 31, 35, 31, 30, 37, 59, 104, 87, 44, 20, 15, 12, 26, 39, 50, 31, 21, 17, 21, 21, 21, 35, 35, 38, 37, 34, 34, 41, 27, 27, 15, 27, 33, 32, 30, 32, 23, 30, 33, 23, 26, 22, 13, 8, 12, 12, 12, 13, 13, 13, 12, 12, 12, 13, 10, 13, 10, 13, 10, 9, 9, 11, 12, 15, 14, 11, 6, 2, 15, 61, 71, 115, 127, 127, 154, 139, 146, 175, 173, 183, 168, 164, 189, 177, 166, 135, 32, 107, 100, 49, 40, 13, 10, 20, 37, 30, 24, 139, 163, 173, 168, 164, 179, 183, 175, 179, 166, 134, 143, 150, 158, 158, 153, 155, 156, 151, 148, 135, 126, 127, 136, 146, 151, 135, 137, 115, 116, 82, 92, 96, 107, 122, 109, 127, 60, 59, 51, 49, 43, 51, 61, 55, 44, 46, 45, 36, 51, 55, 70, 38, 13, 10, 43, 58, 51, 52, 46, 12, 20, 17, 23, 27, 24, 46, 18, 14, 13, 16, 15, 11, 8, 8, 8, 8, 8, 8, 8, 9, 13, 10, 11, 8, 9, 13, 10, 11, 14, 18, 16, 23, 29, 28, 20, 1, 6, 27, 41, 30, 61, 65, 20, 42, 95, 44, 66, 36, 63, 37, 26, 25, 60, 65, 34, 34, 37, 49, 59, 56, 34, 20, 17, 14, 16, 18, 19, 18, 23, 23, 24, 29, 32, 47, 122, 121, 65, 49, 60, 52, 36, 45, 68, 49, 16, 15, 29, 40, 25, 27, 20, 45, 25, 20, 20, 29, 31, 25, 31, 39, 34, 48, 58, 92, 117, 109, 52, 42, 52, 88, 119, 131, 65, 24, 14, 7, 18, 32, 43, 74, 33, 28, 18, 13, 10, 13, 10, 21, 16, 16, 17, 22, 23, 21, 23, 31, 3, 22, 28, 20, 24, 15, 16, 22, 21, 9, 13, 13, 12, 11, 11, 11, 11, 9, 9, 9, 12, 12, 12, 12, 12, 12, 11, 12, 13, 13, 13, 12, 9, 15, 31, 9, 32, 76, 111, 109, 121, 151, 145, 152, 174, 171, 169, 162, 169, 182, 165, 169, 158, 129, 155, 136, 28, 35, 20, 133, 135, 36, 54, 149, 181, 172, 175, 168, 161, 174, 179, 177, 156, 127, 139, 159, 160, 157, 154, 153, 154, 152, 147, 138, 149, 134, 131, 136, 135, 141, 137, 136, 105, 92, 95, 89, 107, 117, 108, 128, 59, 57, 49, 47, 53, 59, 52, 50, 37, 32, 37, 34, 36, 46, 48, 43, 37, 50, 61, 56, 54, 41, 15, 27, 17, 25, 21, 24, 40, 22, 16, 13, 15, 15, 12, 8, 8, 8, 9, 9, 9, 9, 12, 13, 14, 13, 10, 12, 13, 14, 14, 14, 16, 18, 21, 22, 20, 11, 13, 10, 4, 1, 8, 30, 62, 62, 31, 47, 72, 30, 44, 39, 67, 28, 21, 40, 54, 47, 58, 54, 33, 28, 32, 56, 56, 31, 19, 20, 18, 17, 16, 16, 24, 25, 28, 36, 43, 72, 113, 72, 42, 49, 45, 32, 25, 38, 60, 30, 13, 12, 23, 28, 13, 15, 29, 57, 28, 22, 19, 15, 40, 44, 47, 79, 109, 101, 98, 118, 123, 136, 88, 78, 61, 84, 88, 129, 93, 40, 25, 13, 10, 18, 28, 36, 78, 58, 29, 19, 9, 13, 10, 30, 18, 12, 12, 14, 14, 12, 15, 31, 9, 12, 12, 9, 14, 13, 10, 11, 17, 18, 12, 13, 13, 12, 11, 11, 11, 11, 13, 13, 13, 12, 12, 12, 12, 12, 12, 12, 13, 13, 14, 12, 12, 9, 13, 10, 27, 9, 13, 27, 89, 108, 116, 151, 148, 148, 157, 167, 172, 174, 169, 188, 173, 167, 163, 147, 152, 134, 75, 130, 105, 143, 140, 41, 73, 141, 149, 156, 161, 168, 167, 177, 177, 170, 158, 134, 137, 148, 151, 152, 152, 157, 147, 152, 146, 141, 151, 148, 138, 121, 121, 130, 135, 125, 95, 97, 105, 95, 100, 117, 97, 101, 58, 58, 51, 42, 65, 63, 46, 42, 34, 36, 46, 47, 41, 42, 55, 48, 44, 55, 56, 60, 65, 47, 18, 19, 11, 11, 11, 12, 13, 14, 11, 12, 13, 14, 11, 13, 10, 13, 10, 13, 10, 13, 10, 11, 11, 11, 15, 16, 16, 13, 13, 15, 17, 16, 16, 16, 15, 16, 18, 21, 23, 21, 16, 13, 10, 3, 28, 38, 39, 47, 54, 18, 19, 45, 65, 28, 23, 46, 37, 31, 48, 79, 68, 44, 31, 30, 55, 58, 47, 32, 28, 23, 21, 23, 28, 30, 33, 37, 46, 79, 99, 34, 22, 34, 43, 27, 22, 29, 49, 20, 13, 10, 9, 18, 20, 12, 17, 36, 63, 37, 17, 19, 30, 38, 67, 74, 89, 162, 183, 160, 140, 167, 162, 94, 100, 73, 62, 64, 80, 118, 71, 32, 19, 20, 30, 39, 55, 92, 21, 18, 14, 14, 38, 31, 21, 14, 12, 12, 9, 13, 10, 23, 17, 6, 8, 7, 13, 10, 13, 9, 7, 9, 11, 11, 12, 12, 12, 13, 13, 13, 11, 11, 11, 12, 12, 12, 12, 12, 12, 13, 13, 14, 15, 14, 13, 13, 10, 9, 11, 14, 13, 10, 12, 75, 127, 131, 161, 149, 159, 157, 161, 158, 163, 173, 179, 175, 163, 160, 150, 160, 155, 152, 147, 140, 143, 142, 35, 75, 135, 148, 151, 156, 164, 167, 172, 176, 173, 155, 139, 150, 146, 148, 153, 143, 158, 156, 153, 145, 143, 150, 150, 138, 105, 103, 120, 133, 128, 107, 93, 113, 102, 96, 112, 79, 79, 59, 59, 51, 41, 60, 62, 44, 38, 38, 44, 43, 42, 46, 55, 50, 57, 44, 45, 57, 65, 74, 32, 13, 10, 13, 10, 7, 4, 9, 6, 7, 7, 7, 8, 9, 13, 10, 9, 13, 10, 13, 10, 13, 10, 12, 12, 12, 13, 15, 15, 16, 15, 16, 18, 20, 20, 19, 17, 17, 19, 23, 24, 25, 21, 13, 9, 3, 3, 1, 1, 22, 32, 32, 28, 27, 55, 56, 28, 26, 30, 32, 38, 28, 40, 61, 70, 51, 27, 22, 49, 70, 54, 45, 37, 33, 32, 23, 23, 24, 24, 31, 63, 81, 30, 26, 31, 36, 29, 29, 31, 33, 9, 7, 8, 16, 37, 16, 17, 26, 51, 69, 22, 27, 42, 45, 80, 109, 142, 159, 193, 149, 172, 163, 173, 119, 114, 102, 82, 55, 62, 102, 98, 51, 31, 25, 30, 33, 32, 52, 40, 27, 20, 12, 23, 27, 26, 13, 18, 16, 13, 10, 12, 24, 21, 11, 15, 9, 17, 14, 13, 14, 11, 12, 7, 4, 8, 13, 18, 25, 29, 29, 29, 27, 16, 16, 11, 9, 13, 10, 7, 11, 12, 14, 17, 18, 13, 15, 14, 12, 17, 6, 12, 80, 137, 144, 164, 146, 143, 142, 166, 166, 174, 172, 175, 178, 121, 139, 159, 163, 165, 163, 170, 160, 145, 143, 44, 111, 152, 150, 161, 166, 164, 161, 162, 168, 168, 155, 141, 143, 139, 145, 152, 148, 158, 154, 157, 150, 154, 157, 155, 142, 117, 127, 130, 130, 109, 85, 93, 102, 107, 91, 66, 20, 30, 57, 56, 46, 38, 50, 49, 41, 42, 43, 45, 43, 44, 46, 52, 52, 56, 58, 48, 46, 64, 41, 15, 7, 7, 6, 6, 7, 7, 7, 7, 7, 7, 7, 8, 7, 11, 9, 8, 14, 15, 16, 16, 17, 17, 17, 17, 18, 20, 21, 22, 22, 18, 20, 22, 23, 25, 25, 21, 13, 9, 7, 7, 4, 5, 9, 4, 1, 17, 32, 61, 44, 23, 34, 54, 63, 58, 46, 17, 26, 50, 73, 61, 32, 29, 43, 61, 66, 59, 53, 46, 28, 24, 25, 24, 25, 53, 66, 33, 28, 23, 26, 27, 29, 40, 19, 7, 12, 15, 17, 44, 20, 15, 11, 37, 97, 18, 33, 43, 74, 88, 118, 146, 138, 176, 162, 169, 139, 169, 148, 86, 119, 79, 66, 60, 85, 94, 82, 50, 33, 32, 23, 13, 36, 76, 43, 30, 13, 20, 20, 25, 20, 26, 21, 20, 14, 28, 22, 9, 8, 7, 15, 19, 19, 24, 24, 29, 34, 35, 41, 47, 47, 45, 46, 36, 36, 36, 39, 39, 38, 37, 25, 8, 3, 13, 18, 17, 18, 14, 17, 16, 16, 16, 11, 13, 10, 69, 142, 143, 139, 121, 125, 146, 171, 173, 174, 176, 170, 167, 124, 139, 163, 160, 166, 157, 163, 167, 161, 142, 112, 162, 163, 165, 165, 168, 164, 158, 154, 161, 156, 150, 142, 141, 141, 157, 165, 154, 150, 148, 155, 164, 161, 159, 152, 137, 137, 132, 126, 113, 100, 81, 90, 87, 66, 49, 12, 19, 15, 53, 50, 41, 33, 43, 43, 47, 52, 54, 51, 51, 50, 47, 48, 52, 57, 58, 52, 17, 38, 50, 46, 11, 7, 7, 7, 7, 7, 7, 7, 7, 7, 7, 8, 7, 12, 13, 10, 8, 17, 19, 20, 21, 21, 21, 21, 18, 19, 20, 19, 21, 23, 16, 17, 19, 19, 20, 21, 23, 22, 13, 11, 11, 9, 12, 18, 7, 3, 3, 7, 23, 18, 22, 38, 46, 68, 81, 72, 31, 24, 29, 47, 76, 70, 38, 23, 30, 43, 61, 70, 61, 48, 41, 42, 41, 45, 70, 58, 28, 19, 19, 23, 20, 28, 46, 14, 15, 17, 22, 26, 33, 25, 14, 16, 38, 85, 15, 37, 55, 102, 97, 129, 157, 136, 135, 170, 153, 116, 148, 129, 78, 104, 113, 99, 118, 96, 91, 104, 110, 56, 37, 33, 23, 41, 75, 53, 34, 23, 24, 24, 29, 27, 32, 26, 21, 15, 28, 13, 10, 5, 20, 30, 42, 43, 42, 43, 41, 41, 41, 38, 35, 33, 34, 34, 33, 36, 39, 41, 38, 37, 40, 40, 46, 36, 13, 8, 7, 12, 12, 16, 16, 16, 18, 15, 12, 7, 65, 126, 138, 138, 144, 126, 144, 175, 175, 171, 170, 176, 154, 135, 165, 155, 161, 160, 164, 168, 169, 159, 156, 179, 156, 162, 163, 165, 166, 164, 158, 151, 158, 151, 118, 136, 148, 148, 157, 162, 157, 147, 139, 129, 159, 158, 160, 148, 133, 127, 135, 117, 107, 88, 87, 80, 82, 26, 11, 18, 15, 12, 45, 45, 38, 31, 33, 50, 60, 61, 60, 58, 55, 50, 46, 44, 50, 56, 57, 62, 34, 3, 2, 8, 7, 13, 10, 9, 9, 7, 7, 7, 7, 7, 7, 7, 8, 7, 13, 10, 13, 10, 11, 19, 21, 21, 22, 21, 21, 22, 19, 19, 20, 20, 20, 18, 17, 18, 20, 21, 20, 21, 24, 24, 18, 17, 16, 13, 19, 23, 15, 14, 17, 6, 3, 11, 15, 21, 29, 35, 52, 76, 80, 64, 43, 31, 24, 51, 75, 51, 30, 24, 19, 31, 49, 64, 65, 67, 71, 68, 73, 47, 19, 16, 18, 19, 19, 41, 42, 17, 20, 22, 29, 32, 40, 26, 16, 26, 60, 56, 17, 45, 78, 133, 128, 130, 148, 164, 137, 175, 139, 114, 112, 101, 99, 83, 114, 103, 113, 117, 130, 131, 99, 74, 62, 43, 33, 48, 71, 132, 28, 26, 22, 28, 27, 29, 36, 56, 31, 20, 25, 15, 30, 39, 38, 35, 31, 32, 31, 31, 30, 31, 31, 29, 28, 29, 30, 30, 35, 35, 39, 39, 38, 37, 41, 36, 41, 43, 43, 25, 6, 8, 14, 17, 17, 16, 14, 15, 13, 10, 33, 121, 143, 155, 143, 132, 147, 167, 173, 171, 168, 172, 162, 161, 160, 157, 150, 162, 152, 161, 169, 167, 175, 168, 160, 171, 161, 163, 164, 166, 164, 159, 158, 147, 116, 140, 134, 140, 155, 158, 155, 147, 137, 149, 161, 160, 157, 139, 128, 111, 102, 113, 104, 99, 85, 62, 48, 6, 19, 13, 14, 14, 39, 40, 37, 35, 24, 51, 70, 67, 64, 63, 54, 46, 44, 45, 52, 57, 65, 53, 55, 49, 6, 8, 11, 12, 12, 11, 7, 7, 7, 7, 7, 7, 7, 8, 7, 9, 13, 10, 12, 19, 20, 22, 21, 18, 19, 18, 23, 24, 23, 23, 21, 20, 22, 24, 25, 28, 25, 24, 24, 22, 23, 21, 18, 16, 24, 23, 8, 17, 22, 4, 48, 39, 39, 41, 44, 38, 28, 20, 83, 102, 78, 40, 22, 5, 46, 75, 58, 34, 26, 20, 19, 31, 39, 37, 33, 32, 28, 27, 18, 19, 19, 16, 22, 55, 39, 25, 23, 31, 36, 24, 61, 17, 19, 43, 87, 29, 15, 47, 93, 163, 151, 145, 166, 171, 168, 180, 154, 124, 90, 101, 101, 89, 61, 77, 66, 74, 69, 96, 98, 57, 61, 55, 49, 50, 84, 62, 96, 42, 19, 21, 22, 25, 28, 59, 21, 25, 26, 38, 40, 33, 32, 30, 34, 30, 33, 33, 31, 34, 38, 40, 39, 37, 36, 35, 39, 37, 39, 40, 43, 41, 36, 41, 31, 36, 45, 42, 29, 6, 12, 18, 16, 13, 14, 17, 13, 10, 82, 129, 151, 156, 143, 140, 155, 173, 176, 169, 171, 168, 164, 159, 153, 144, 119, 161, 157, 166, 172, 173, 160, 170, 170, 158, 162, 161, 164, 169, 151, 166, 166, 165, 134, 134, 126, 136, 154, 156, 146, 134, 149, 153, 155, 162, 152, 131, 133, 87, 87, 142, 99, 107, 75, 74, 8, 12, 18, 23, 18, 20, 42, 39, 36, 37, 27, 43, 57, 77, 71, 65, 47, 47, 39, 43, 60, 62, 63, 58, 52, 79, 25, 7, 9, 13, 10, 11, 12, 8, 8, 8, 7, 7, 7, 8, 8, 6, 7, 11, 15, 18, 18, 20, 22, 21, 19, 17, 30, 27, 23, 24, 20, 25, 32, 31, 31, 30, 28, 28, 28, 21, 20, 22, 19, 7, 15, 11, 8, 17, 12, 86, 66, 60, 65, 62, 46, 27, 11, 35, 48, 66, 74, 69, 50, 32, 35, 60, 70, 52, 34, 26, 30, 23, 16, 24, 23, 23, 26, 21, 21, 17, 17, 23, 65, 36, 24, 37, 22, 20, 32, 64, 11, 14, 52, 88, 28, 12, 46, 150, 119, 121, 88, 112, 151, 139, 104, 139, 93, 120, 107, 116, 103, 61, 39, 36, 32, 29, 37, 53, 61, 34, 33, 36, 46, 57, 72, 65, 55, 14, 16, 23, 21, 19, 38, 15, 26, 30, 34, 34, 36, 30, 41, 55, 43, 46, 43, 44, 43, 47, 44, 47, 47, 48, 48, 39, 39, 39, 35, 41, 42, 38, 40, 39, 39, 49, 43, 44, 32, 12, 16, 19, 17, 15, 14, 12, 92, 142, 149, 155, 142, 145, 154, 164, 175, 170, 169, 168, 162, 155, 151, 155, 156, 164, 161, 159, 161, 163, 155, 179, 169, 155, 156, 164, 171, 166, 118, 147, 163, 152, 134, 138, 133, 156, 153, 142, 128, 124, 141, 165, 173, 165, 145, 148, 139, 98, 83, 104, 96, 68, 109, 110, 17, 13, 20, 19, 22, 18, 46, 43, 38, 37, 30, 41, 49, 77, 73, 59, 52, 50, 41, 34, 52, 66, 71, 61, 52, 63, 58, 37, 4, 5, 6, 12, 8, 8, 8, 7, 7, 7, 8, 8, 6, 5, 12, 17, 16, 15, 18, 22, 16, 18, 13, 22, 22, 23, 18, 17, 16, 19, 17, 17, 23, 20, 19, 20, 16, 15, 19, 14, 6, 6, 1, 5, 14, 21, 2, 71, 48, 51, 52, 65, 61, 52, 36, 16, 14, 17, 41, 76, 99, 76, 59, 38, 35, 57, 75, 57, 39, 30, 20, 20, 30, 32, 31, 26, 26, 23, 24, 37, 67, 47, 27, 21, 23, 23, 44, 51, 6, 20, 75, 65, 20, 19, 54, 105, 104, 112, 126, 106, 109, 127, 109, 107, 85, 112, 119, 101, 96, 67, 35, 25, 21, 18, 23, 35, 65, 32, 25, 28, 27, 39, 41, 57, 45, 30, 35, 31, 25, 17, 17, 15, 27, 30, 34, 38, 38, 43, 57, 56, 56, 50, 53, 53, 50, 45, 50, 47, 49, 50, 50, 46, 41, 42, 38, 36, 35, 41, 42, 45, 41, 45, 44, 42, 50, 38, 18, 19, 17, 14, 17, 16, 77, 130, 149, 151, 133, 147, 152, 163, 169, 162, 153, 154, 155, 159, 152, 162, 174, 156, 160, 155, 152, 158, 145, 161, 150, 151, 131, 172, 192, 175, 150, 121, 158, 149, 127, 140, 143, 147, 147, 142, 92, 140, 158, 153, 147, 139, 137, 132, 146, 121, 117, 105, 88, 72, 48, 73, 21, 18, 17, 20, 20, 20, 48, 46, 43, 37, 29, 37, 63, 67, 75, 53, 51, 47, 40, 34, 50, 87, 78, 67, 56, 59, 61, 54, 11, 7, 9, 11, 8, 8, 8, 7, 7, 7, 8, 8, 6, 5, 14, 18, 20, 18, 14, 13, 13, 8, 13, 10, 8, 21, 25, 34, 35, 23, 30, 35, 31, 19, 15, 18, 12, 13, 10, 5, 6, 6, 6, 7, 5, 7, 13, 13, 20, 39, 33, 37, 40, 54, 50, 51, 62, 39, 32, 30, 26, 30, 41, 52, 68, 77, 69, 52, 46, 52, 56, 64, 56, 43, 43, 42, 41, 40, 37, 40, 45, 54, 57, 56, 43, 17, 30, 19, 51, 34, 9, 25, 86, 53, 13, 16, 40, 65, 64, 74, 136, 124, 76, 109, 120, 98, 77, 100, 132, 101, 64, 51, 56, 37, 18, 13, 17, 24, 47, 49, 28, 17, 12, 21, 25, 41, 34, 39, 45, 47, 30, 22, 22, 26, 29, 35, 40, 44, 51, 52, 51, 55, 54, 48, 49, 47, 41, 38, 42, 41, 45, 46, 47, 49, 43, 42, 42, 37, 35, 43, 44, 48, 61, 63, 47, 47, 43, 57, 32, 19, 17, 14, 13, 10, 22, 118, 123, 146, 148, 143, 148, 153, 166, 166, 163, 145, 145, 162, 141, 147, 174, 173, 152, 141, 152, 148, 144, 136, 128, 131, 123, 157, 171, 173, 159, 144, 138, 160, 153, 126, 142, 120, 135, 145, 112, 79, 159, 138, 145, 146, 139, 135, 146, 150, 127, 117, 118, 93, 65, 45, 14, 14, 21, 19, 22, 20, 21, 52, 48, 44, 41, 30, 35, 62, 65, 69, 52, 46, 40, 37, 33, 45, 105, 82, 70, 57, 46, 56, 55, 51, 15, 6, 6, 8, 8, 8, 7, 7, 7, 8, 8, 6, 7, 16, 17, 18, 13, 9, 8, 23, 37, 65, 83, 103, 103, 113, 94, 76, 91, 95, 98, 93, 91, 92, 76, 72, 64, 57, 45, 32, 22, 20, 14, 17, 15, 43, 34, 13, 19, 28, 23, 24, 20, 43, 63, 63, 47, 25, 11, 4, 29, 33, 42, 68, 86, 91, 107, 85, 47, 32, 31, 31, 41, 55, 50, 36, 29, 34, 26, 29, 39, 32, 11, 34, 16, 59, 24, 7, 34, 85, 42, 6, 16, 38, 38, 34, 55, 101, 128, 83, 71, 101, 106, 87, 104, 115, 74, 50, 41, 45, 61, 27, 19, 24, 30, 30, 34, 40, 12, 13, 10, 14, 16, 31, 28, 42, 33, 26, 29, 34, 38, 34, 33, 40, 46, 51, 55, 59, 55, 68, 50, 46, 41, 39, 33, 34, 32, 37, 39, 42, 42, 47, 44, 41, 50, 38, 32, 44, 43, 47, 55, 75, 51, 48, 41, 56, 31, 19, 17, 14, 11, 11, 75, 123, 140, 147, 147, 144, 149, 155, 159, 162, 159, 167, 168, 175, 179, 171, 168, 123, 117, 129, 114, 108, 111, 88, 129, 118, 154, 159, 152, 148, 149, 139, 109, 138, 107, 126, 89, 134, 109, 23, 39, 123, 136, 136, 133, 131, 144, 150, 148, 130, 112, 121, 100, 48, 12, 20, 16, 18, 19, 22, 23, 20, 50, 52, 51, 51, 49, 63, 67, 66, 61, 49, 36, 30, 30, 36, 44, 73, 82, 73, 65, 66, 62, 51, 40, 35, 6, 5, 13, 10, 12, 9, 11, 13, 10, 13, 10, 14, 9, 13, 12, 17, 11, 13, 10, 7, 20, 41, 56, 68, 78, 125, 130, 131, 119, 92, 76, 95, 101, 108, 117, 133, 148, 148, 129, 98, 78, 74, 71, 71, 74, 61, 44, 24, 8, 17, 22, 36, 7, 2, 13, 10, 14, 26, 20, 40, 65, 68, 68, 59, 55, 43, 38, 36, 44, 45, 69, 121, 113, 72, 61, 40, 39, 14, 24, 34, 38, 35, 16, 12, 46, 43, 26, 31, 29, 71, 15, 21, 57, 66, 34, 19, 20, 44, 28, 38, 57, 59, 80, 102, 74, 84, 123, 111, 79, 52, 36, 26, 26, 32, 47, 50, 34, 25, 16, 13, 10, 12, 14, 19, 31, 29, 28, 30, 21, 38, 45, 26, 31, 30, 32, 37, 38, 47, 49, 54, 48, 63, 59, 52, 55, 53, 49, 44, 40, 43, 37, 44, 40, 36, 35, 35, 41, 35, 35, 39, 39, 41, 41, 42, 45, 49, 51, 46, 42, 41, 25, 6, 17, 18, 20, 15, 28, 119, 137, 141, 136, 139, 135, 139, 113, 174, 163, 172, 170, 171, 172, 168, 166, 167, 148, 141, 123, 124, 127, 119, 126, 115, 121, 142, 111, 40, 95, 61, 19, 19, 33, 32, 68, 141, 3, 12, 12, 33, 115, 115, 116, 142, 137, 133, 129, 125, 111, 84, 92, 24, 17, 19, 22, 22, 19, 19, 24, 21, 46, 50, 52, 48, 64, 68, 63, 63, 57, 51, 41, 32, 32, 37, 43, 63, 80, 74, 63, 66, 57, 49, 45, 49, 45, 7, 4, 6, 3, 5, 7, 7, 13, 5, 8, 7, 4, 8, 30, 60, 77, 84, 79, 73, 75, 128, 140, 139, 125, 84, 95, 109, 109, 117, 130, 148, 165, 166, 152, 117, 107, 102, 104, 107, 118, 137, 128, 109, 81, 82, 81, 68, 40, 16, 17, 15, 21, 3, 2, 8, 26, 40, 51, 56, 69, 73, 73, 80, 88, 87, 84, 63, 70, 72, 78, 58, 21, 13, 5, 2, 4, 9, 58, 40, 36, 34, 31, 29, 66, 16, 22, 68, 57, 27, 16, 29, 50, 27, 39, 50, 54, 49, 55, 46, 50, 77, 90, 75, 60, 49, 46, 57, 74, 86, 102, 89, 70, 55, 34, 24, 31, 57, 73, 56, 32, 19, 19, 32, 31, 31, 34, 35, 37, 40, 45, 57, 55, 49, 58, 62, 56, 59, 58, 72, 63, 51, 47, 38, 41, 40, 36, 34, 34, 40, 38, 42, 41, 37, 40, 39, 40, 40, 44, 45, 53, 59, 48, 49, 27, 13, 10, 15, 20, 14, 9, 11, 91, 126, 128, 126, 117, 121, 121, 70, 155, 152, 165, 165, 157, 141, 166, 166, 176, 165, 149, 146, 131, 118, 126, 111, 104, 111, 111, 54, 9, 9, 13, 10, 15, 19, 16, 12, 7, 105, 13, 17, 16, 9, 50, 80, 67, 108, 124, 115, 110, 107, 69, 22, 22, 9, 20, 20, 22, 22, 20, 19, 23, 19, 41, 48, 52, 55, 71, 64, 43, 52, 55, 55, 50, 40, 37, 39, 46, 69, 84, 69, 63, 66, 56, 51, 51, 49, 57, 40, 5, 3, 4, 6, 3, 8, 2, 3, 28, 73, 97, 84, 72, 78, 79, 76, 85, 132, 142, 135, 127, 93, 119, 125, 128, 132, 138, 154, 170, 172, 151, 119, 116, 112, 115, 120, 132, 139, 145, 128, 92, 106, 113, 121, 112, 97, 93, 74, 25, 12, 14, 6, 2, 9, 28, 17, 26, 30, 47, 54, 68, 71, 87, 83, 75, 63, 74, 53, 7, 7, 13, 4, 4, 54, 33, 46, 34, 22, 30, 29, 59, 19, 25, 73, 42, 17, 13, 41, 54, 26, 25, 30, 43, 32, 24, 16, 13, 22, 26, 56, 109, 90, 100, 124, 141, 157, 168, 148, 129, 125, 81, 56, 64, 105, 105, 47, 27, 36, 32, 27, 29, 35, 35, 36, 38, 43, 62, 57, 69, 56, 61, 65, 65, 67, 60, 65, 61, 55, 53, 42, 47, 36, 34, 34, 33, 54, 34, 38, 38, 40, 38, 37, 37, 37, 38, 41, 57, 72, 50, 63, 23, 16, 17, 24, 12, 5, 12, 43, 120, 99, 103, 102, 106, 104, 88, 118, 153, 161, 160, 149, 155, 168, 162, 153, 143, 134, 139, 115, 127, 84, 76, 78, 102, 67, 8, 13, 12, 13, 13, 10, 9, 18, 19, 2, 4, 6, 25, 15, 15, 13, 12, 8, 37, 90, 64, 25, 31, 17, 16, 21, 16, 19, 23, 23, 23, 20, 17, 14, 18, 41, 47, 53, 56, 59, 60, 29, 51, 48, 44, 60, 54, 45, 45, 62, 78, 90, 85, 69, 62, 54, 50, 46, 55, 56, 47, 17, 4, 6, 8, 13, 10, 5, 2, 13, 10, 64, 95, 102, 100, 80, 91, 96, 98, 98, 116, 136, 139, 134, 115, 115, 129, 140, 141, 144, 148, 162, 174, 175, 149, 132, 127, 119, 125, 133, 146, 163, 162, 129, 97, 111, 117, 117, 114, 116, 119, 143, 151, 95, 18, 9, 17, 12, 9, 6, 20, 23, 28, 32, 34, 39, 43, 49, 48, 73, 16, 27, 27, 16, 20, 51, 52, 46, 43, 51, 19, 29, 28, 55, 17, 32, 75, 28, 8, 11, 57, 43, 20, 18, 18, 28, 30, 25, 17, 28, 26, 28, 40, 133, 145, 154, 165, 185, 191, 188, 178, 171, 176, 150, 133, 125, 131, 58, 35, 41, 41, 38, 31, 32, 35, 38, 40, 45, 49, 70, 77, 85, 80, 77, 84, 68, 68, 68, 73, 72, 68, 66, 50, 44, 45, 38, 34, 33, 44, 36, 37, 36, 38, 39, 34, 34, 36, 36, 36, 48, 65, 63, 48, 17, 21, 22, 28, 19, 39, 49, 48, 50, 52, 58, 61, 60, 62, 62, 63, 64, 98, 131, 155, 154, 155, 158, 158, 111, 88, 126, 105, 73, 14, 11, 11, 16, 11, 19, 11, 9, 13, 10, 11, 12, 14, 17, 11, 18, 16, 21, 17, 21, 12, 13, 17, 11, 19, 14, 26, 22, 21, 13, 15, 16, 19, 20, 24, 23, 21, 19, 17, 17, 39, 54, 58, 55, 46, 52, 40, 49, 35, 42, 64, 65, 61, 55, 63, 87, 102, 96, 68, 59, 48, 51, 52, 63, 44, 42, 11, 3, 6, 9, 14, 11, 18, 71, 92, 96, 95, 104, 88, 107, 106, 104, 119, 139, 135, 136, 127, 107, 125, 140, 141, 141, 144, 155, 172, 182, 175, 152, 139, 142, 135, 133, 136, 159, 176, 174, 140, 108, 118, 117, 116, 119, 112, 125, 156, 158, 155, 86, 7, 13, 12, 14, 9, 8, 5, 1, 1, 5, 9, 29, 29, 36, 36, 17, 26, 25, 29, 38, 63, 51, 65, 50, 21, 59, 28, 28, 34, 55, 6, 43, 80, 19, 4, 18, 64, 32, 8, 13, 10, 17, 34, 62, 74, 54, 50, 54, 63, 76, 146, 162, 177, 191, 194, 194, 182, 185, 184, 182, 172, 172, 153, 98, 37, 38, 35, 38, 32, 31, 39, 40, 50, 43, 51, 66, 77, 91, 78, 76, 95, 81, 87, 74, 79, 79, 74, 65, 58, 53, 44, 53, 51, 31, 28, 35, 36, 37, 32, 32, 35, 36, 28, 34, 34, 32, 32, 40, 37, 33, 39, 37, 40, 40, 39, 41, 42, 46, 41, 48, 47, 48, 49, 50, 54, 52, 50, 51, 60, 105, 130, 136, 137, 98, 40, 14, 17, 17, 16, 16, 19, 17, 13, 12, 11, 12, 14, 13, 13, 16, 21, 17, 27, 27, 21, 17, 18, 16, 16, 21, 23, 20, 21, 21, 21, 21, 18, 16, 14, 23, 24, 23, 23, 24, 23, 22, 21, 20, 54, 57, 62, 60, 45, 48, 58, 54, 42, 52, 68, 78, 65, 65, 69, 67, 70, 66, 57, 55, 49, 50, 48, 40, 28, 36, 7, 7, 2, 5, 7, 18, 35, 79, 93, 101, 105, 107, 119, 104, 113, 114, 119, 137, 153, 145, 143, 133, 115, 136, 149, 150, 145, 149, 165, 177, 180, 171, 149, 153, 137, 140, 135, 136, 170, 184, 180, 144, 123, 127, 123, 116, 114, 117, 133, 160, 167, 159, 139, 39, 12, 14, 20, 23, 21, 17, 15, 12, 9, 6, 3, 3, 11, 8, 28, 80, 69, 79, 73, 70, 76, 53, 25, 49, 39, 29, 24, 50, 49, 13, 10, 51, 81, 11, 8, 28, 84, 33, 14, 9, 30, 70, 100, 137, 132, 116, 118, 123, 148, 167, 180, 189, 196, 199, 199, 196, 187, 188, 184, 187, 185, 164, 54, 36, 35, 31, 31, 33, 34, 39, 41, 46, 68, 71, 73, 102, 65, 65, 89, 89, 95, 96, 81, 73, 64, 73, 69, 63, 61, 45, 48, 41, 36, 32, 34, 33, 32, 35, 32, 31, 32, 28, 30, 31, 37, 39, 34, 37, 34, 30, 30, 33, 33, 39, 40, 41, 42, 43, 42, 43, 44, 45, 46, 47, 47, 45, 44, 45, 49, 79, 88, 63, 15, 15, 14, 13, 12, 13, 14, 18, 18, 17, 13, 12, 13, 12, 13, 15, 20, 21, 18, 29, 28, 22, 18, 20, 20, 20, 19, 20, 21, 22, 22, 18, 19, 16, 15, 18, 26, 24, 23, 23, 24, 24, 22, 21, 21, 69, 87, 69, 56, 53, 50, 54, 48, 47, 60, 63, 71, 64, 60, 65, 65, 56, 57, 58, 62, 57, 48, 47, 33, 43, 28, 9, 11, 21, 23, 28, 59, 66, 83, 92, 101, 109, 119, 123, 111, 119, 121, 128, 148, 160, 155, 153, 146, 135, 141, 153, 147, 155, 162, 169, 179, 178, 168, 154, 153, 152, 147, 142, 140, 168, 181, 175, 139, 135, 140, 133, 120, 116, 123, 144, 165, 166, 158, 140, 89, 11, 14, 19, 24, 23, 20, 18, 16, 15, 13, 11, 21, 24, 33, 23, 64, 81, 62, 49, 51, 29, 53, 71, 53, 23, 47, 19, 69, 47, 16, 60, 78, 11, 8, 45, 99, 41, 29, 25, 57, 84, 121, 173, 164, 166, 175, 183, 185, 180, 182, 190, 198, 201, 199, 191, 193, 187, 189, 176, 170, 126, 41, 39, 35, 42, 41, 30, 37, 42, 49, 55, 84, 101, 81, 84, 56, 97, 105, 113, 90, 91, 83, 82, 99, 87, 78, 69, 58, 48, 42, 37, 34, 35, 35, 37, 39, 34, 30, 28, 27, 29, 34, 35, 39, 45, 42, 43, 38, 35, 34, 33, 35, 41, 42, 43, 40, 45, 39, 42, 43, 43, 43, 43, 43, 43, 47, 43, 47, 57, 65, 24, 8, 8, 5, 13, 14, 14, 16, 23, 19, 18, 13, 12, 14, 12, 14, 17, 22, 19, 19, 28, 27, 19, 18, 24, 25, 25, 19, 18, 22, 22, 23, 16, 17, 15, 15, 21, 28, 24, 23, 24, 25, 24, 23, 22, 21, 73, 83, 75, 44, 52, 49, 48, 42, 50, 57, 64, 59, 61, 63, 61, 59, 54, 47, 55, 57, 68, 56, 48, 47, 63, 63, 85, 90, 90, 99, 100, 98, 66, 77, 84, 102, 117, 131, 121, 109, 115, 117, 126, 145, 159, 170, 161, 142, 141, 145, 156, 147, 159, 170, 175, 179, 177, 165, 162, 165, 160, 154, 151, 150, 163, 175, 166, 128, 123, 130, 129, 126, 122, 137, 167, 183, 179, 156, 151, 129, 14, 14, 14, 11, 12, 12, 17, 16, 16, 16, 24, 32, 29, 24, 26, 33, 31, 31, 32, 30, 53, 67, 53, 26, 38, 26, 25, 77, 39, 15, 77, 68, 11, 8, 62, 112, 74, 53, 55, 96, 136, 164, 173, 173, 188, 187, 183, 188, 182, 192, 200, 203, 200, 192, 184, 169, 173, 183, 165, 125, 64, 37, 35, 37, 43, 45, 40, 48, 50, 59, 68, 94, 106, 90, 77, 74, 115, 119, 105, 99, 97, 116, 93, 87, 84, 80, 79, 61, 55, 50, 54, 45, 38, 38, 34, 31, 31, 31, 33, 35, 38, 39, 41, 40, 44, 48, 47, 43, 44, 42, 38, 38, 42, 43, 44, 42, 42, 43, 43, 42, 41, 41, 42, 42, 45, 42, 47, 45, 46, 48, 48, 16, 7, 11, 18, 18, 17, 17, 22, 16, 16, 14, 13, 14, 14, 14, 16, 19, 15, 20, 27, 23, 17, 19, 24, 26, 28, 23, 22, 21, 20, 21, 18, 18, 17, 17, 21, 26, 24, 25, 24, 26, 25, 23, 22, 22, 67, 70, 57, 34, 47, 42, 43, 29, 37, 43, 63, 22, 62, 69, 65, 56, 55, 68, 62, 65, 69, 53, 62, 76, 90, 106, 104, 101, 105, 108, 98, 100, 59, 75, 91, 111, 127, 141, 110, 101, 118, 126, 126, 141, 153, 166, 157, 131, 137, 153, 159, 159, 159, 172, 179, 183, 166, 160, 161, 165, 171, 162, 164, 163, 168, 174, 161, 130, 122, 127, 124, 123, 127, 146, 173, 183, 179, 159, 149, 129, 21, 16, 15, 6, 6, 8, 9, 12, 17, 19, 23, 20, 18, 22, 23, 27, 27, 68, 75, 57, 46, 31, 39, 36, 41, 15, 47, 71, 20, 16, 93, 52, 9, 11, 79, 119, 104, 107, 111, 131, 167, 168, 160, 169, 178, 179, 182, 168, 159, 194, 189, 200, 198, 179, 164, 145, 173, 157, 159, 97, 43, 40, 40, 42, 52, 43, 48, 49, 57, 82, 82, 94, 89, 93, 104, 102, 117, 131, 109, 110, 107, 114, 95, 108, 93, 79, 87, 66, 50, 44, 37, 35, 26, 28, 28, 25, 31, 32, 38, 45, 45, 41, 42, 41, 45, 47, 44, 46, 45, 44, 40, 40, 41, 41, 44, 44, 42, 45, 45, 44, 41, 45, 43, 45, 46, 47, 43, 48, 49, 44, 46, 55, 20, 6, 30, 19, 16, 17, 15, 12, 14, 13, 12, 13, 14, 14, 15, 18, 14, 18, 27, 25, 19, 20, 23, 25, 27, 25, 24, 19, 21, 20, 21, 20, 17, 19, 22, 23, 23, 26, 26, 26, 23, 23, 23, 23, 56, 53, 45, 32, 51, 37, 31, 21, 27, 32, 47, 15, 38, 49, 61, 65, 68, 102, 70, 50, 62, 76, 80, 84, 95, 101, 106, 107, 107, 106, 103, 105, 73, 95, 102, 117, 125, 139, 103, 99, 125, 136, 132, 140, 151, 153, 135, 110, 138, 159, 160, 163, 160, 174, 176, 169, 150, 153, 164, 164, 167, 173, 177, 176, 175, 182, 156, 138, 130, 125, 121, 124, 133, 149, 177, 184, 178, 152, 142, 85, 21, 16, 14, 11, 11, 13, 10, 9, 11, 12, 15, 16, 13, 14, 22, 28, 35, 27, 33, 35, 30, 31, 53, 79, 55, 23, 29, 76, 48, 2, 23, 88, 42, 13, 10, 24, 83, 94, 132, 124, 147, 141, 156, 165, 146, 157, 181, 181, 144, 84, 152, 191, 178, 179, 170, 163, 111, 112, 147, 100, 86, 75, 47, 37, 38, 41, 63, 42, 49, 47, 71, 83, 109, 98, 86, 88, 102, 105, 115, 111, 105, 127, 117, 108, 113, 113, 89, 71, 66, 48, 35, 36, 29, 30, 32, 30, 28, 31, 37, 40, 41, 45, 45, 45, 44, 45, 43, 45, 44, 40, 41, 40, 41, 41, 39, 43, 44, 41, 47, 45, 43, 47, 46, 42, 43, 44, 43, 45, 45, 45, 48, 49, 48, 46, 41, 15, 27, 20, 20, 12, 12, 12, 13, 11, 11, 11, 12, 14, 16, 20, 25, 21, 29, 31, 23, 23, 24, 25, 25, 25, 23, 21, 21, 20, 22, 21, 18, 20, 21, 22, 28, 32, 28, 23, 24, 23, 21, 20, 50, 48, 42, 39, 52, 38, 9, 6, 11, 14, 12, 13, 9, 14, 44, 57, 57, 60, 49, 43, 72, 88, 89, 90, 98, 106, 107, 108, 106, 105, 94, 94, 81, 100, 106, 118, 123, 134, 101, 103, 128, 139, 138, 139, 142, 143, 110, 111, 136, 160, 160, 161, 157, 165, 168, 145, 153, 159, 172, 174, 172, 177, 181, 187, 182, 187, 157, 150, 143, 135, 128, 126, 142, 162, 187, 188, 182, 143, 93, 43, 23, 13, 10, 4, 11, 9, 9, 9, 5, 7, 11, 13, 12, 13, 10, 13, 16, 21, 30, 26, 21, 36, 59, 71, 57, 38, 17, 37, 91, 27, 5, 48, 104, 42, 30, 36, 21, 7, 54, 74, 71, 101, 114, 151, 77, 143, 136, 142, 57, 16, 173, 175, 171, 154, 126, 98, 38, 14, 20, 22, 13, 10, 61, 45, 37, 38, 41, 48, 56, 54, 59, 82, 91, 82, 88, 78, 72, 103, 111, 124, 104, 104, 103, 123, 107, 123, 111, 66, 44, 45, 41, 33, 28, 27, 33, 39, 35, 32, 41, 43, 44, 42, 42, 43, 47, 53, 41, 48, 46, 45, 39, 41, 39, 38, 42, 40, 43, 45, 41, 45, 42, 50, 56, 42, 51, 47, 43, 43, 46, 46, 46, 46, 54, 52, 44, 49, 36, 7, 15, 30, 16, 11, 11, 12, 12, 12, 12, 13, 14, 17, 22, 22, 24, 30, 31, 24, 24, 25, 26, 26, 25, 24, 24, 21, 21, 22, 20, 19, 21, 25, 26, 28, 29, 28, 23, 26, 23, 22, 20, 52, 48, 41, 41, 50, 32, 8, 13, 10, 9, 8, 12, 13, 15, 11, 11, 37, 48, 47, 67, 50, 76, 80, 90, 92, 101, 108, 105, 104, 98, 95, 91, 90, 79, 98, 109, 119, 124, 127, 100, 106, 127, 141, 143, 142, 137, 124, 79, 106, 132, 154, 158, 157, 153, 146, 139, 137, 157, 167, 178, 185, 186, 188, 186, 191, 191, 183, 168, 159, 154, 147, 131, 137, 160, 169, 190, 191, 179, 139, 121, 168, 131, 22, 3, 11, 11, 11, 8, 7, 8, 8, 13, 10, 13, 10, 9, 12, 16, 17, 23, 26, 27, 27, 13, 13, 10, 24, 35, 41, 67, 81, 33, 18, 79, 92, 59, 27, 2, 8, 3, 13, 10, 25, 31, 24, 15, 13, 10, 19, 13, 12, 20, 21, 29, 65, 87, 43, 37, 26, 37, 18, 24, 23, 20, 44, 43, 39, 38, 37, 44, 51, 60, 64, 58, 88, 79, 91, 89, 79, 79, 83, 88, 104, 109, 120, 118, 142, 119, 103, 59, 33, 39, 33, 35, 32, 30, 31, 38, 43, 42, 47, 47, 47, 43, 45, 42, 44, 45, 66, 42, 50, 41, 41, 42, 43, 42, 41, 43, 42, 39, 45, 45, 41, 40, 46, 68, 45, 51, 46, 47, 45, 47, 47, 47, 50, 45, 50, 41, 42, 43, 15, 13, 10, 28, 25, 13, 12, 14, 13, 13, 13, 15, 13, 17, 47, 30, 31, 32, 31, 24, 23, 23, 24, 25, 24, 23, 21, 22, 24, 24, 19, 21, 23, 23, 25, 26, 24, 24, 27, 23, 22, 23, 24, 46, 44, 31, 44, 50, 16, 15, 15, 13, 14, 12, 11, 16, 17, 16, 8, 29, 61, 79, 61, 68, 84, 88, 95, 103, 110, 111, 109, 102, 96, 95, 85, 91, 104, 117, 121, 127, 122, 101, 105, 124, 140, 145, 146, 150, 128, 83, 109, 130, 148, 156, 152, 146, 125, 122, 140, 154, 169, 170, 183, 188, 181, 192, 209, 192, 179, 182, 164, 165, 161, 149, 139, 165, 186, 186, 186, 168, 169, 158, 161, 161, 100, 4, 15, 15, 13, 13, 10, 11, 13, 10, 8, 13, 10, 13, 13, 10, 12, 9, 15, 17, 33, 19, 22, 18, 32, 19, 1, 6, 4, 16, 27, 13, 22, 5, 2, 5, 20, 18, 24, 28, 39, 20, 21, 20, 29, 23, 22, 33, 23, 25, 31, 39, 36, 36, 40, 59, 29, 23, 49, 23, 67, 42, 37, 37, 36, 48, 45, 75, 81, 89, 78, 94, 85, 80, 64, 65, 81, 80, 111, 85, 102, 151, 127, 64, 47, 35, 28, 25, 51, 45, 35, 32, 32, 43, 51, 48, 62, 51, 46, 50, 48, 46, 45, 44, 47, 47, 47, 52, 44, 49, 40, 37, 51, 44, 39, 42, 42, 46, 48, 44, 45, 48, 48, 52, 40, 49, 44, 47, 47, 47, 46, 45, 46, 38, 38, 40, 30, 12, 21, 22, 15, 14, 16, 13, 13, 13, 15, 13, 18, 18, 29, 36, 30, 29, 22, 22, 21, 22, 23, 24, 20, 18, 19, 22, 21, 18, 21, 24, 26, 26, 20, 14, 19, 24, 25, 23, 20, 19, 42, 37, 36, 42, 26, 11, 18, 16, 14, 9, 9, 9, 16, 15, 24, 57, 68, 81, 93, 73, 57, 81, 96, 100, 105, 111, 110, 104, 96, 95, 96, 81, 91, 109, 117, 120, 125, 122, 98, 111, 121, 140, 150, 151, 148, 136, 93, 106, 128, 144, 149, 152, 147, 119, 118, 134, 152, 170, 176, 179, 186, 177, 173, 185, 169, 174, 180, 176, 181, 171, 158, 130, 173, 192, 187, 174, 163, 157, 157, 144, 132, 126, 20, 16, 15, 11, 9, 8, 5, 9, 8, 8, 13, 10, 7, 13, 10, 11, 9, 13, 10, 18, 11, 16, 19, 32, 33, 18, 16, 16, 12, 4, 4, 8, 6, 12, 18, 29, 27, 27, 26, 23, 29, 20, 28, 28, 29, 28, 25, 25, 28, 30, 43, 39, 33, 31, 30, 31, 31, 36, 31, 63, 38, 29, 31, 35, 59, 68, 70, 72, 72, 89, 92, 78, 80, 71, 64, 90, 74, 98, 88, 105, 101, 56, 38, 37, 31, 27, 25, 40, 40, 38, 37, 35, 45, 44, 52, 65, 63, 51, 55, 46, 50, 53, 55, 52, 50, 62, 57, 49, 53, 48, 40, 42, 56, 37, 40, 41, 44, 59, 41, 40, 48, 45, 53, 42, 46, 48, 43, 48, 45, 49, 46, 43, 42, 40, 41, 40, 14, 18, 23, 15, 15, 15, 18, 18, 20, 19, 18, 20, 24, 24, 29, 25, 25, 29, 25, 23, 22, 24, 25, 21, 19, 19, 19, 20, 19, 22, 21, 17, 17, 14, 11, 13, 10, 14, 15, 13, 11, 9, 31, 26, 46, 34, 4, 13, 10, 14, 13, 11, 7, 13, 10, 9, 13, 25, 66, 85, 84, 85, 91, 67, 53, 80, 95, 99, 101, 102, 93, 89, 89, 95, 99, 76, 77, 104, 117, 126, 129, 124, 107, 108, 128, 141, 152, 151, 150, 148, 107, 112, 134, 148, 151, 162, 153, 126, 115, 129, 149, 170, 173, 174, 162, 156, 151, 145, 170, 168, 170, 171, 185, 186, 152, 137, 178, 191, 183, 166, 138, 154, 153, 116, 105, 96, 38, 28, 23, 20, 26, 24, 24, 34, 40, 45, 34, 32, 25, 20, 18, 25, 51, 88, 112, 78, 22, 35, 38, 34, 23, 18, 22, 25, 20, 17, 14, 21, 21, 22, 27, 21, 15, 20, 24, 25, 28, 30, 26, 26, 26, 28, 31, 38, 36, 36, 37, 36, 38, 37, 23, 54, 51, 32, 22, 30, 38, 50, 64, 99, 75, 68, 84, 101, 86, 62, 59, 46, 75, 62, 61, 80, 61, 44, 37, 39, 33, 33, 26, 41, 41, 41, 35, 41, 39, 42, 63, 58, 54, 52, 56, 57, 55, 52, 58, 60, 59, 57, 64, 56, 53, 48, 61, 47, 46, 67, 41, 42, 42, 41, 46, 41, 36, 55, 45, 46, 37, 49, 50, 53, 45, 40, 47, 45, 43, 41, 42, 41, 41, 18, 16, 23, 17, 17, 17, 21, 24, 26, 25, 24, 26, 25, 24, 24, 23, 29, 27, 30, 25, 24, 22, 22, 24, 25, 24, 19, 18, 18, 14, 11, 8, 9, 13, 10, 9, 13, 10, 9, 9, 13, 10, 9, 8, 22, 32, 40, 11, 2, 13, 10, 11, 12, 13, 10, 9, 14, 24, 33, 42, 68, 83, 75, 62, 63, 60, 57, 81, 91, 92, 87, 82, 75, 78, 87, 89, 103, 92, 79, 95, 114, 132, 138, 135, 118, 106, 127, 145, 152, 152, 153, 158, 114, 112, 140, 148, 153, 178, 160, 134, 109, 127, 148, 168, 167, 163, 157, 142, 131, 133, 148, 155, 168, 164, 171, 173, 166, 172, 201, 206, 172, 146, 108, 143, 120, 93, 89, 91, 106, 88, 74, 70, 71, 68, 67, 79, 91, 100, 97, 88, 80, 68, 71, 81, 86, 106, 134, 124, 16, 20, 24, 19, 23, 17, 20, 27, 27, 19, 26, 25, 16, 21, 17, 12, 13, 16, 24, 26, 25, 30, 32, 30, 32, 35, 37, 40, 36, 39, 42, 41, 43, 38, 34, 63, 36, 27, 22, 30, 40, 46, 76, 100, 100, 76, 88, 82, 67, 55, 64, 58, 68, 57, 54, 62, 34, 27, 27, 28, 31, 32, 32, 51, 58, 37, 36, 40, 42, 45, 65, 59, 46, 52, 54, 39, 63, 63, 70, 73, 86, 85, 67, 69, 67, 54, 61, 55, 55, 61, 48, 45, 43, 39, 38, 42, 41, 56, 45, 39, 39, 44, 42, 52, 45, 44, 44, 43, 42, 45, 46, 41, 37, 22, 13, 17, 17, 17, 17, 21, 26, 26, 23, 23, 25, 26, 25, 22, 28, 30, 24, 26, 24, 24, 22, 20, 24, 24, 20, 18, 20, 12, 9, 9, 11, 12, 12, 13, 10, 11, 13, 10, 13, 10, 9, 9, 9, 5, 26, 19, 7, 7, 3, 13, 10, 14, 20, 27, 34, 37, 39, 44, 61, 59, 53, 39, 47, 67, 65, 66, 79, 83, 80, 75, 72, 79, 86, 92, 104, 105, 85, 97, 109, 131, 141, 144, 131, 108, 117, 143, 152, 156, 155, 163, 125, 107, 136, 154, 154, 186, 169, 150, 109, 129, 150, 165, 166, 157, 154, 143, 125, 129, 149, 146, 151, 169, 188, 195, 198, 192, 189, 184, 137, 112, 97, 107, 96, 98, 103, 111, 114, 103, 77, 70, 70, 67, 64, 73, 92, 98, 109, 80, 67, 61, 70, 90, 92, 104, 122, 132, 35, 5, 13, 10, 12, 9, 8, 16, 18, 18, 19, 30, 25, 32, 21, 15, 13, 10, 12, 15, 27, 37, 25, 25, 32, 36, 33, 33, 31, 34, 27, 34, 40, 39, 43, 34, 49, 48, 32, 23, 20, 32, 40, 47, 62, 72, 76, 69, 85, 79, 59, 50, 51, 53, 61, 52, 51, 34, 34, 24, 27, 28, 28, 30, 44, 51, 60, 46, 36, 42, 39, 47, 60, 65, 59, 56, 59, 55, 74, 79, 82, 78, 91, 120, 89, 82, 68, 55, 60, 54, 60, 57, 55, 45, 42, 39, 37, 43, 50, 51, 48, 37, 41, 37, 38, 56, 47, 41, 42, 42, 42, 47, 46, 41, 34, 25, 14, 13, 16, 16, 16, 21, 25, 22, 21, 20, 22, 26, 26, 23, 29, 24, 26, 25, 22, 19, 22, 24, 26, 22, 17, 18, 17, 13, 10, 9, 9, 13, 10, 12, 11, 13, 10, 13, 10, 13, 10, 11, 9, 13, 10, 13, 10, 13, 10, 13, 10, 13, 10, 11, 12, 13, 16, 24, 28, 27, 29, 34, 40, 36, 43, 35, 31, 41, 38, 54, 73, 62, 71, 73, 75, 75, 73, 81, 94, 103, 118, 129, 121, 117, 94, 122, 141, 149, 156, 147, 123, 124, 135, 143, 152, 169, 130, 96, 111, 135, 160, 160, 186, 191, 125, 111, 141, 167, 179, 171, 164, 153, 141, 156, 160, 170, 168, 172, 191, 192, 179, 157, 121, 83, 82, 101, 107, 97, 85, 82, 99, 135, 159, 142, 114, 88, 73, 72, 81, 90, 118, 140, 149, 131, 84, 62, 83, 83, 72, 83, 121, 142, 110, 7, 14, 15, 12, 8, 3, 16, 19, 28, 20, 17, 36, 31, 33, 47, 19, 18, 26, 35, 33, 32, 36, 55, 29, 37, 37, 34, 27, 26, 41, 42, 31, 21, 37, 36, 34, 31, 36, 24, 31, 63, 76, 108, 87, 63, 51, 64, 69, 56, 48, 62, 51, 44, 43, 39, 36, 30, 33, 31, 28, 25, 48, 56, 57, 46, 37, 34, 34, 50, 52, 47, 40, 64, 61, 68, 89, 71, 69, 74, 78, 86, 76, 69, 70, 57, 56, 56, 55, 58, 47, 37, 43, 39, 41, 36, 38, 46, 49, 42, 37, 37, 37, 44, 53, 47, 44, 46, 43, 47, 46, 44, 36, 33, 21, 17, 19, 22, 21, 23, 24, 26, 19, 18, 16, 23, 24, 21, 24, 21, 20, 23, 17, 15, 18, 20, 16, 20, 15, 19, 14, 4, 5, 11, 13, 10, 13, 10, 6, 6, 7, 7, 7, 7, 7, 7, 13, 10, 13, 10, 13, 10, 11, 12, 13, 12, 26, 33, 32, 34, 32, 31, 24, 26, 40, 37, 37, 53, 65, 55, 58, 70, 75, 70, 64, 58, 63, 76, 90, 102, 120, 118, 99, 88, 104, 132, 140, 149, 150, 119, 118, 130, 139, 143, 168, 146, 95, 106, 132, 154, 153, 182, 191, 133, 102, 134, 164, 175, 175, 173, 166, 141, 141, 155, 160, 161, 167, 179, 171, 150, 147, 137, 89, 84, 93, 106, 96, 88, 87, 101, 134, 163, 153, 126, 102, 85, 79, 88, 92, 125, 155, 163, 152, 104, 80, 79, 68, 88, 84, 103, 137, 146, 68, 19, 14, 13, 8, 5, 16, 14, 28, 19, 16, 22, 83, 55, 26, 17, 18, 21, 23, 28, 33, 28, 24, 19, 19, 34, 41, 33, 25, 31, 37, 21, 25, 33, 35, 34, 32, 36, 25, 29, 83, 80, 81, 72, 63, 55, 45, 50, 57, 42, 51, 47, 41, 38, 35, 31, 29, 34, 37, 30, 28, 41, 77, 55, 46, 66, 40, 40, 57, 65, 43, 39, 69, 92, 92, 77, 71, 72, 89, 78, 70, 71, 65, 64, 63, 60, 60, 61, 51, 43, 45, 43, 40, 41, 39, 43, 42, 42, 44, 36, 35, 38, 44, 47, 46, 48, 39, 40, 44, 43, 41, 40, 37, 24, 22, 20, 19, 19, 22, 22, 24, 25, 26, 26, 35, 40, 35, 34, 28, 22, 22, 18, 16, 18, 18, 22, 24, 15, 11, 8, 8, 4, 13, 10, 11, 13, 10, 7, 6, 7, 7, 7, 7, 7, 7, 13, 10, 13, 10, 13, 10, 11, 12, 13, 12, 26, 30, 24, 21, 19, 27, 27, 40, 36, 36, 33, 63, 82, 84, 71, 33, 49, 61, 63, 53, 14, 9, 32, 65, 88, 106, 95, 92, 99, 118, 119, 139, 148, 142, 133, 130, 129, 137, 158, 151, 101, 99, 124, 141, 140, 176, 182, 145, 100, 130, 158, 166, 175, 184, 174, 129, 128, 146, 162, 154, 131, 128, 129, 144, 155, 152, 97, 77, 82, 94, 89, 91, 95, 107, 132, 160, 160, 138, 116, 98, 88, 88, 89, 128, 163, 173, 168, 134, 102, 92, 73, 91, 84, 101, 140, 144, 146, 35, 9, 13, 9, 4, 12, 15, 21, 24, 12, 17, 60, 35, 15, 16, 17, 18, 17, 20, 23, 23, 19, 18, 18, 15, 29, 26, 22, 21, 26, 12, 27, 30, 32, 34, 33, 35, 29, 37, 97, 73, 104, 81, 46, 68, 54, 52, 53, 52, 60, 45, 42, 37, 31, 29, 33, 43, 40, 23, 29, 47, 81, 53, 57, 54, 41, 55, 55, 64, 36, 35, 90, 102, 101, 82, 91, 73, 75, 78, 86, 73, 76, 65, 65, 60, 66, 72, 49, 41, 47, 40, 40, 39, 40, 43, 44, 42, 40, 36, 34, 36, 41, 44, 50, 47, 42, 37, 43, 40, 39, 39, 35, 22, 23, 30, 30, 35, 43, 47, 50, 46, 47, 48, 45, 43, 41, 40, 39, 41, 44, 42, 37, 34, 38, 44, 46, 40, 31, 29, 24, 11, 7, 12, 9, 7, 6, 7, 7, 7, 7, 7, 7, 13, 10, 13, 10, 13, 10, 11, 12, 13, 14, 24, 26, 22, 24, 27, 34, 35, 33, 42, 57, 57, 67, 78, 62, 16, 1, 4, 6, 5, 2, 7, 3, 2, 13, 27, 11, 53, 103, 102, 101, 74, 121, 137, 147, 141, 132, 135, 149, 134, 105, 93, 115, 126, 127, 155, 170, 156, 103, 128, 149, 155, 170, 183, 177, 123, 108, 129, 116, 103, 110, 129, 135, 147, 156, 154, 116, 58, 64, 81, 83, 86, 88, 104, 130, 154, 164, 146, 127, 111, 109, 102, 113, 141, 174, 185, 178, 162, 120, 85, 67, 78, 87, 98, 121, 153, 128, 38, 15, 14, 8, 5, 13, 10, 13, 17, 30, 15, 13, 41, 47, 15, 16, 17, 21, 21, 14, 13, 13, 13, 13, 10, 11, 16, 13, 10, 15, 17, 15, 15, 11, 22, 29, 29, 34, 34, 34, 32, 40, 73, 162, 63, 76, 76, 53, 50, 61, 46, 49, 48, 41, 41, 32, 29, 34, 37, 45, 32, 21, 32, 40, 57, 50, 56, 46, 42, 63, 79, 75, 36, 32, 66, 90, 87, 107, 95, 81, 64, 73, 113, 86, 92, 83, 80, 59, 72, 64, 62, 49, 46, 43, 43, 41, 45, 46, 48, 43, 37, 37, 36, 31, 39, 40, 43, 46, 46, 39, 43, 39, 39, 39, 39, 37, 41, 44, 47, 47, 45, 43, 40, 36, 35, 35, 37, 36, 33, 33, 31, 28, 28, 34, 36, 35, 36, 34, 38, 39, 36, 31, 31, 16, 5, 9, 9, 7, 6, 7, 7, 7, 7, 7, 7, 9, 12, 13, 10, 12, 11, 14, 17, 24, 29, 24, 21, 24, 23, 31, 44, 64, 80, 73, 57, 41, 11, 1, 5, 13, 10, 14, 16, 11, 11, 9, 8, 6, 6, 11, 7, 5, 30, 43, 58, 18, 65, 97, 134, 152, 145, 136, 149, 130, 112, 97, 110, 122, 128, 142, 156, 152, 120, 124, 137, 144, 161, 178, 171, 122, 88, 100, 99, 105, 117, 134, 147, 162, 162, 157, 128, 59, 66, 83, 96, 101, 97, 103, 130, 154, 170, 153, 134, 119, 107, 106, 119, 147, 175, 191, 189, 181, 138, 99, 89, 76, 100, 90, 96, 131, 137, 22, 12, 16, 13, 7, 9, 13, 10, 12, 23, 20, 14, 16, 76, 18, 16, 19, 20, 29, 13, 16, 14, 14, 15, 13, 10, 14, 13, 14, 14, 14, 11, 12, 25, 30, 29, 31, 34, 39, 45, 38, 63, 104, 83, 114, 65, 83, 52, 51, 57, 46, 40, 36, 33, 29, 35, 37, 45, 37, 20, 25, 33, 40, 48, 47, 54, 54, 46, 70, 88, 105, 35, 29, 70, 81, 78, 115, 65, 73, 79, 98, 95, 115, 96, 85, 71, 61, 67, 58, 63, 52, 51, 47, 51, 46, 46, 46, 44, 43, 36, 40, 32, 36, 38, 40, 35, 45, 51, 35, 40, 38, 37, 36, 41, 43, 44, 39, 39, 38, 36, 35, 34, 31, 31, 31, 32, 30, 30, 29, 28, 27, 27, 27, 28, 29, 38, 39, 51, 43, 40, 33, 33, 19, 4, 11, 9, 7, 6, 7, 7, 7, 7, 7, 7, 7, 13, 10, 9, 11, 11, 13, 20, 25, 29, 27, 29, 31, 31, 47, 52, 61, 58, 31, 7, 4, 4, 9, 13, 17, 17, 13, 13, 12, 11, 9, 9, 18, 16, 13, 11, 13, 10, 14, 9, 39, 56, 132, 142, 151, 140, 152, 149, 135, 112, 110, 126, 140, 147, 148, 142, 125, 122, 135, 125, 134, 155, 148, 104, 89, 99, 105, 108, 116, 134, 149, 167, 167, 165, 141, 79, 87, 91, 104, 106, 113, 120, 145, 164, 169, 159, 144, 133, 130, 127, 129, 151, 178, 191, 190, 186, 151, 112, 106, 93, 103, 101, 107, 130, 139, 31, 12, 16, 8, 9, 13, 13, 13, 10, 15, 23, 17, 15, 46, 22, 20, 21, 21, 32, 37, 20, 20, 27, 22, 25, 20, 15, 16, 12, 12, 12, 15, 23, 31, 30, 32, 32, 37, 40, 44, 75, 99, 88, 62, 80, 65, 42, 48, 51, 38, 34, 34, 32, 30, 36, 48, 11, 19, 26, 25, 31, 37, 46, 50, 57, 54, 48, 90, 93, 95, 47, 39, 60, 68, 68, 81, 71, 76, 92, 100, 92, 90, 69, 71, 61, 55, 54, 50, 52, 47, 44, 44, 46, 43, 43, 49, 51, 52, 42, 45, 44, 33, 41, 35, 34, 35, 34, 31, 38, 36, 34, 34, 36, 40, 40, 36, 36, 36, 36, 34, 33, 32, 32, 32, 35, 33, 30, 29, 30, 30, 29, 28, 28, 28, 34, 38, 58, 52, 37, 35, 34, 29, 11, 8, 13, 10, 8, 6, 7, 7, 7, 7, 7, 7, 7, 8, 9, 12, 13, 14, 18, 23, 32, 33, 29, 28, 28, 27, 17, 11, 8, 1, 6, 9, 9, 13, 10, 12, 14, 14, 11, 11, 13, 10, 11, 11, 11, 13, 14, 14, 15, 13, 13, 10, 11, 6, 16, 134, 127, 129, 127, 146, 150, 147, 138, 135, 143, 149, 150, 146, 144, 124, 127, 127, 116, 102, 105, 114, 100, 110, 113, 111, 103, 111, 138, 161, 174, 171, 172, 154, 93, 102, 105, 118, 117, 125, 138, 156, 166, 166, 166, 160, 152, 150, 145, 146, 156, 170, 184, 193, 188, 155, 126, 119, 117, 114, 108, 119, 128, 146, 102, 5, 15, 11, 13, 10, 14, 14, 9, 13, 10, 16, 18, 15, 29, 38, 22, 21, 22, 28, 32, 22, 31, 45, 33, 25, 21, 25, 16, 14, 12, 21, 17, 18, 31, 34, 36, 32, 55, 33, 65, 82, 91, 100, 64, 107, 54, 42, 46, 41, 29, 29, 31, 30, 31, 42, 30, 3, 23, 28, 22, 30, 35, 42, 47, 62, 56, 40, 71, 70, 85, 58, 55, 61, 66, 64, 64, 88, 59, 99, 103, 95, 70, 61, 54, 49, 41, 42, 43, 39, 44, 39, 41, 41, 40, 41, 42, 41, 46, 48, 49, 49, 34, 36, 34, 34, 34, 35, 38, 38, 35, 32, 32, 33, 37, 39, 37, 37, 37, 38, 38, 38, 34, 34, 34, 35, 37, 35, 33, 33, 33, 33, 31, 31, 31, 28, 34, 33, 42, 50, 38, 35, 36, 25, 9, 13, 10, 8, 7, 7, 7, 7, 7, 7, 7, 9, 8, 13, 10, 14, 17, 16, 15, 12, 13, 10, 13, 10, 8, 7, 9, 8, 7, 5, 4, 7, 7, 9, 13, 10, 8, 11, 13, 10, 9, 9, 5, 7, 7, 9, 11, 11, 3, 5, 7, 8, 12, 12, 5, 7, 12, 66, 100, 104, 113, 139, 154, 159, 147, 150, 149, 151, 144, 155, 160, 135, 120, 109, 103, 91, 109, 115, 110, 122, 111, 102, 98, 111, 145, 173, 178, 175, 180, 167, 114, 116, 126, 136, 137, 139, 150, 163, 171, 161, 168, 183, 177, 167, 169, 161, 158, 167, 179, 194, 186, 155, 141, 135, 131, 119, 128, 121, 128, 148, 158, 53, 14, 15, 12, 15, 13, 12, 11, 8, 14, 15, 9, 25, 23, 19, 22, 22, 25, 41, 29, 24, 22, 17, 24, 31, 24, 25, 19, 29, 24, 15, 29, 34, 35, 34, 30, 41, 56, 94, 86, 130, 52, 85, 43, 42, 41, 33, 26, 26, 29, 28, 31, 45, 13, 21, 30, 26, 29, 30, 35, 41, 51, 58, 50, 42, 62, 59, 88, 72, 75, 57, 66, 65, 64, 59, 61, 98, 78, 71, 44, 41, 40, 43, 39, 39, 40, 37, 41, 39, 40, 38, 38, 37, 39, 36, 41, 40, 27, 28, 25, 31, 35, 38, 35, 36, 36, 39, 37, 33, 33, 34, 37, 40, 40, 40, 40, 41, 42, 42, 37, 37, 37, 36, 37, 38, 40, 39, 37, 36, 36, 36, 36, 33, 30, 39, 38, 40, 44, 38, 46, 39, 12, 13, 10, 8, 8, 7, 7, 7, 7, 7, 7, 9, 7, 11, 16, 19, 18, 16, 12, 11, 13, 11, 11, 13, 13, 10, 13, 10, 9, 8, 6, 6, 12, 13, 13, 10, 13, 10, 9, 8, 7, 5, 5, 7, 9, 11, 11, 3, 3, 6, 6, 6, 9, 7, 8, 15, 11, 12, 8, 42, 124, 149, 155, 156, 160, 163, 160, 146, 161, 162, 144, 103, 96, 98, 107, 115, 125, 109, 118, 104, 105, 107, 120, 152, 178, 179, 177, 186, 175, 140, 136, 142, 155, 154, 165, 179, 176, 174, 154, 157, 175, 173, 170, 172, 158, 173, 183, 183, 194, 185, 157, 154, 155, 139, 133, 131, 124, 148, 153, 159, 112, 13, 14, 13, 14, 13, 15, 13, 12, 12, 11, 15, 18, 20, 17, 22, 20, 16, 18, 17, 21, 20, 21, 14, 14, 16, 19, 24, 41, 40, 15, 25, 32, 36, 37, 35, 40, 55, 87, 127, 97, 65, 60, 44, 39, 36, 31, 27, 26, 30, 28, 34, 29, 1, 53, 33, 30, 29, 33, 35, 40, 55, 53, 47, 56, 66, 63, 80, 73, 84, 56, 63, 66, 55, 57, 85, 72, 59, 47, 38, 33, 37, 37, 34, 40, 41, 37, 37, 39, 36, 36, 34, 30, 29, 29, 29, 23, 27, 27, 27, 37, 35, 43, 43, 39, 38, 38, 37, 35, 34, 36, 41, 42, 40, 43, 41, 44, 43, 45, 40, 43, 41, 43, 40, 37, 42, 42, 40, 39, 38, 37, 37, 32, 31, 33, 36, 37, 41, 40, 54, 49, 13, 9, 8, 8, 7, 7, 7, 7, 7, 7, 8, 9, 14, 18, 21, 19, 17, 15, 15, 18, 18, 17, 15, 13, 12, 11, 13, 10, 13, 10, 13, 10, 11, 11, 11, 13, 10, 13, 10, 13, 10, 9, 13, 10, 9, 13, 10, 13, 10, 13, 10, 13, 10, 11, 11, 11, 11, 11, 11, 13, 10, 11, 12, 13, 13, 10, 11, 26, 142, 142, 149, 145, 156, 168, 176, 172, 154, 152, 130, 95, 92, 96, 113, 134, 128, 89, 104, 134, 142, 123, 128, 154, 186, 191, 184, 186, 181, 152, 149, 160, 179, 173, 182, 185, 193, 181, 141, 141, 164, 166, 187, 169, 172, 206, 207, 195, 199, 176, 153, 171, 161, 151, 135, 130, 139, 172, 174, 167, 100, 6, 15, 18, 14, 13, 14, 16, 17, 17, 13, 10, 12, 15, 17, 17, 17, 17, 17, 18, 18, 16, 16, 16, 14, 14, 16, 16, 24, 17, 24, 9, 20, 23, 35, 37, 42, 27, 44, 77, 88, 66, 79, 37, 40, 36, 32, 26, 25, 28, 31, 28, 28, 12, 6, 49, 32, 32, 34, 36, 37, 35, 49, 40, 65, 74, 85, 75, 91, 85, 74, 60, 56, 63, 59, 44, 46, 40, 36, 34, 34, 38, 35, 34, 36, 33, 33, 33, 39, 33, 35, 29, 27, 24, 28, 28, 28, 29, 31, 32, 37, 45, 40, 44, 37, 34, 34, 36, 38, 40, 41, 43, 44, 43, 45, 44, 45, 47, 59, 56, 42, 41, 47, 47, 44, 42, 39, 39, 41, 41, 37, 38, 40, 35, 36, 33, 33, 34, 35, 34, 41, 55, 12, 7, 8, 8, 7, 7, 7, 7, 7, 7, 12, 16, 20, 20, 21, 17, 17, 15, 15, 18, 19, 21, 16, 16, 12, 13, 10, 12, 12, 12, 13, 12, 11, 12, 9, 12, 9, 13, 13, 13, 10, 11, 11, 11, 11, 11, 11, 12, 12, 12, 11, 11, 12, 14, 11, 12, 23, 103, 90, 89, 100, 130, 152, 160, 155, 150, 145, 123, 97, 100, 110, 132, 132, 95, 93, 117, 149, 143, 122, 134, 156, 185, 196, 210, 208, 196, 161, 156, 175, 181, 175, 171, 178, 181, 177, 134, 128, 151, 168, 185, 174, 174, 188, 195, 196, 190, 163, 140, 152, 157, 151, 137, 130, 132, 179, 178, 169, 108, 3, 6, 13, 12, 11, 13, 10, 11, 11, 11, 11, 11, 11, 12, 13, 13, 12, 11, 12, 13, 8, 11, 13, 13, 10, 9, 13, 10, 9, 8, 13, 11, 5, 23, 20, 28, 37, 36, 37, 60, 126, 47, 46, 40, 35, 31, 34, 34, 31, 27, 26, 20, 13, 10, 6, 14, 11, 41, 32, 32, 34, 38, 43, 36, 36, 50, 82, 85, 93, 94, 70, 96, 78, 72, 53, 62, 50, 50, 46, 42, 37, 36, 38, 37, 32, 34, 35, 33, 38, 29, 34, 39, 30, 21, 22, 24, 30, 31, 32, 33, 34, 35, 45, 48, 40, 38, 35, 33, 35, 36, 42, 43, 46, 48, 50, 48, 40, 48, 62, 53, 71, 58, 63, 45, 50, 42, 36, 43, 41, 41, 42, 44, 43, 40, 39, 37, 37, 38, 35, 36, 36, 33, 36, 47, 9, 7, 8, 8, 7, 7, 7, 7, 7, 7, 12, 18, 18, 17, 15, 14, 17, 15, 15, 18, 19, 21, 18, 12, 8, 7, 9, 9, 9, 11, 12, 13, 15, 15, 11, 15, 17, 16, 13, 12, 12, 12, 11, 11, 11, 13, 13, 13, 12, 12, 13, 14, 14, 13, 11, 12, 12, 15, 16, 60, 97, 92, 108, 125, 112, 95, 89, 108, 115, 121, 129, 95, 100, 119, 152, 144, 135, 135, 157, 176, 203, 218, 218, 206, 161, 156, 178, 176, 168, 162, 170, 173, 168, 141, 155, 176, 177, 166, 173, 171, 183, 180, 184, 167, 133, 142, 151, 159, 161, 144, 130, 133, 185, 182, 176, 125, 2, 2, 9, 13, 11, 9, 9, 8, 8, 11, 11, 11, 11, 11, 11, 13, 10, 8, 9, 13, 10, 9, 8, 7, 8, 6, 7, 9, 8, 6, 16, 12, 17, 25, 28, 38, 33, 53, 70, 49, 40, 36, 32, 34, 30, 32, 21, 17, 11, 9, 6, 3, 12, 23, 7, 33, 32, 32, 34, 37, 47, 40, 36, 62, 56, 79, 85, 94, 75, 108, 86, 81, 67, 43, 42, 51, 47, 44, 41, 35, 35, 34, 32, 35, 36, 38, 33, 38, 37, 27, 25, 27, 28, 29, 33, 35, 36, 38, 40, 41, 49, 41, 37, 33, 36, 36, 36, 40, 45, 46, 52, 53, 57, 62, 60, 48, 57, 58, 55, 56, 62, 63, 59, 54, 53, 56, 52, 46, 44, 44, 42, 43, 44, 38, 34, 37, 38, 37, 36, 34, 35, 44, 8, 7, 8, 8, 7, 7, 7, 7, 7, 7, 13, 20, 15, 14, 13, 14, 17, 15, 15, 18, 17, 18, 20, 12, 7, 9, 5, 5, 5, 9, 12, 15, 13, 31, 17, 18, 16, 13, 14, 13, 10, 13, 10, 13, 10, 9, 9, 9, 11, 11, 11, 12, 12, 13, 14, 13, 13, 18, 11, 19, 21, 26, 19, 17, 21, 16, 13, 76, 88, 92, 103, 109, 120, 132, 123, 117, 130, 152, 139, 130, 145, 151, 167, 190, 203, 207, 180, 151, 154, 164, 165, 155, 153, 159, 159, 163, 137, 161, 157, 161, 166, 167, 160, 166, 172, 165, 134, 132, 144, 140, 150, 159, 144, 139, 152, 201, 194, 183, 139, 5, 5, 13, 18, 17, 15, 14, 12, 11, 11, 12, 13, 12, 12, 12, 11, 13, 10, 11, 12, 13, 10, 13, 10, 13, 10, 11, 9, 9, 9, 9, 7, 12, 14, 8, 27, 33, 32, 44, 71, 32, 33, 36, 30, 32, 32, 23, 13, 10, 7, 9, 13, 10, 13, 14, 13, 14, 26, 11, 30, 32, 32, 34, 35, 46, 44, 40, 66, 69, 60, 92, 88, 79, 93, 91, 88, 53, 37, 45, 43, 42, 38, 33, 23, 26, 35, 34, 39, 40, 35, 52, 34, 27, 24, 26, 27, 30, 34, 36, 36, 38, 41, 45, 46, 48, 36, 38, 37, 38, 39, 42, 57, 59, 61, 68, 63, 63, 68, 95, 51, 64, 71, 57, 55, 55, 61, 63, 51, 62, 61, 60, 52, 45, 46, 44, 42, 42, 45, 45, 37, 39, 38, 37, 35, 37, 45, 8, 7, 8, 8, 7, 7, 7, 7, 7, 7, 13, 10, 8, 5, 5, 5, 5, 7, 8, 8, 13, 10, 14, 15, 13, 7, 7, 7, 7, 7, 7, 9, 7, 9, 12, 17, 18, 14, 12, 13, 12, 11, 11, 9, 6, 8, 9, 11, 11, 11, 12, 13, 13, 13, 13, 16, 18, 15, 19, 24, 28, 19, 13, 14, 13, 10, 62, 88, 90, 101, 106, 120, 126, 132, 141, 129, 138, 144, 139, 143, 136, 147, 162, 175, 186, 188, 160, 136, 144, 148, 158, 153, 149, 148, 146, 146, 137, 139, 154, 157, 159, 156, 148, 141, 148, 132, 132, 135, 128, 144, 154, 161, 163, 166, 206, 207, 203, 192, 133, 13, 10, 15, 15, 18, 18, 16, 19, 19, 19, 14, 13, 13, 12, 12, 12, 12, 12, 11, 13, 10, 11, 11, 11, 11, 11, 11, 13, 10, 13, 10, 13, 10, 17, 17, 4, 18, 29, 36, 41, 61, 40, 37, 35, 31, 27, 25, 7, 4, 8, 12, 15, 17, 17, 11, 16, 19, 18, 27, 29, 32, 32, 34, 41, 43, 70, 54, 81, 66, 84, 94, 89, 111, 78, 55, 45, 39, 34, 29, 30, 28, 28, 26, 33, 33, 38, 41, 48, 48, 33, 29, 25, 29, 29, 31, 35, 40, 39, 37, 41, 47, 51, 46, 45, 37, 40, 42, 44, 44, 51, 70, 69, 81, 64, 75, 78, 76, 66, 68, 64, 54, 55, 68, 62, 58, 60, 53, 64, 57, 55, 59, 43, 44, 45, 51, 44, 44, 48, 47, 35, 42, 40, 33, 37, 52, 8, 8, 8, 8, 7, 7, 7, 6, 6, 6, 6, 6, 6, 7, 7, 7, 7, 6, 6, 7, 9, 9, 8, 7, 7, 7, 7, 7, 7, 8, 6, 5, 7, 13, 10, 14, 16, 13, 14, 13, 12, 11, 13, 10, 8, 9, 9, 9, 9, 9, 12, 13, 13, 13, 14, 17, 20, 18, 24, 28, 24, 15, 8, 6, 63, 101, 85, 103, 114, 120, 116, 116, 131, 147, 134, 140, 141, 141, 153, 135, 146, 157, 166, 171, 175, 138, 114, 125, 144, 150, 149, 145, 133, 121, 119, 133, 136, 145, 150, 148, 142, 134, 130, 115, 136, 139, 132, 130, 143, 167, 185, 183, 191, 208, 205, 203, 188, 131, 9, 13, 10, 11, 14, 12, 14, 15, 17, 18, 12, 12, 13, 10, 12, 13, 13, 13, 14, 13, 13, 13, 13, 13, 13, 13, 13, 12, 12, 12, 17, 16, 8, 9, 31, 36, 42, 66, 36, 36, 32, 32, 27, 15, 5, 9, 12, 15, 17, 18, 17, 12, 15, 17, 16, 24, 30, 31, 33, 33, 43, 41, 50, 60, 87, 60, 89, 84, 89, 81, 49, 45, 36, 39, 32, 26, 29, 27, 29, 33, 42, 46, 49, 50, 44, 46, 27, 30, 32, 33, 31, 30, 34, 39, 40, 40, 46, 54, 52, 52, 44, 47, 51, 51, 52, 57, 60, 77, 67, 75, 69, 74, 79, 79, 70, 75, 57, 52, 49, 45, 46, 57, 49, 57, 45, 48, 44, 75, 50, 40, 43, 51, 43, 40, 45, 60, 63, 39, 43, 35, 38, 44, 8, 8, 8, 8, 7, 7, 7, 6, 6, 6, 5, 6, 7, 7, 7, 7, 6, 6, 6, 6, 6, 7, 5, 7, 7, 7, 7, 7, 7, 7, 5, 5, 8, 7, 8, 12, 13, 15, 15, 13, 12, 11, 11, 11, 13, 10, 9, 9, 9, 13, 14, 14, 14, 15, 19, 22, 19, 27, 30, 24, 7, 17, 64, 95, 82, 96, 113, 118, 124, 112, 112, 129, 150, 142, 144, 138, 140, 148, 137, 143, 153, 156, 154, 160, 118, 106, 124, 147, 148, 144, 136, 129, 106, 108, 122, 131, 140, 144, 136, 130, 131, 120, 113, 137, 139, 134, 128, 133, 162, 180, 182, 179, 189, 190, 186, 166, 98, 1, 1, 3, 2, 6, 13, 10, 13, 13, 14, 15, 14, 13, 13, 14, 15, 14, 13, 13, 13, 13, 13, 13, 13, 12, 12, 12, 11, 12, 13, 7, 24, 34, 40, 80, 40, 37, 31, 34, 31, 15, 9, 11, 11, 13, 14, 14, 14, 13, 10, 14, 17, 26, 22, 37, 29, 31, 38, 42, 45, 47, 59, 93, 78, 64, 74, 79, 49, 43, 36, 34, 37, 32, 29, 34, 38, 45, 59, 71, 70, 55, 57, 35, 28, 33, 37, 37, 36, 34, 38, 37, 36, 40, 45, 53, 56, 53, 51, 51, 57, 59, 57, 68, 65, 62, 69, 54, 65, 78, 75, 79, 61, 70, 68, 57, 49, 43, 45, 49, 57, 44, 48, 48, 44, 46, 52, 50, 50, 48, 49, 45, 43, 41, 43, 94, 48, 41, 37, 40, 45, 7, 8, 8, 8, 7, 7, 7, 6, 6, 6, 6, 6, 5, 7, 7, 7, 7, 7, 7, 7, 7, 7, 6, 7, 7, 7, 7, 7, 7, 6, 6, 7, 6, 6, 7, 8, 7, 13, 10, 13, 10, 14, 13, 12, 13, 12, 11, 13, 10, 13, 10, 13, 10, 14, 15, 15, 14, 15, 20, 24, 19, 27, 29, 25, 40, 86, 94, 106, 122, 101, 109, 124, 122, 109, 116, 130, 146, 152, 156, 136, 141, 144, 140, 144, 148, 148, 140, 147, 103, 114, 136, 153, 143, 137, 133, 132, 114, 105, 119, 129, 133, 133, 130, 126, 123, 114, 112, 116, 126, 125, 124, 116, 124, 141, 150, 136, 145, 153, 152, 139, 68, 33, 38, 42, 36, 33, 24, 19, 16, 13, 22, 20, 17, 17, 17, 17, 17, 15, 15, 14, 13, 13, 13, 13, 13, 13, 12, 12, 12, 9, 12, 11, 8, 13, 32, 38, 65, 40, 37, 30, 30, 31, 16, 13, 13, 13, 10, 11, 13, 10, 13, 10, 11, 7, 12, 18, 26, 23, 32, 35, 32, 34, 33, 55, 45, 76, 83, 91, 70, 66, 58, 38, 34, 39, 37, 35, 32, 36, 40, 42, 68, 93, 84, 68, 33, 38, 28, 27, 32, 37, 38, 36, 37, 40, 39, 37, 40, 50, 56, 54, 58, 50, 69, 76, 72, 74, 84, 65, 72, 62, 66, 78, 73, 79, 77, 73, 59, 55, 47, 51, 41, 42, 43, 38, 37, 43, 52, 38, 44, 40, 47, 54, 63, 52, 54, 47, 45, 49, 63, 65, 43, 39, 41, 44, 4, 8, 8, 8, 7, 7, 7, 6, 6, 6, 6, 6, 6, 6, 6, 6, 7, 7, 7, 7, 7, 7, 7, 7, 7, 7, 7, 7, 7, 7, 7, 7, 8, 8, 8, 8, 8, 9, 13, 10, 16, 18, 20, 14, 13, 13, 14, 12, 13, 10, 8, 13, 10, 12, 14, 15, 17, 28, 24, 27, 29, 59, 102, 127, 133, 137, 128, 108, 113, 125, 119, 116, 121, 132, 134, 129, 99, 111, 128, 143, 153, 147, 141, 140, 127, 111, 86, 116, 151, 169, 147, 146, 150, 148, 144, 108, 118, 126, 129, 131, 133, 132, 126, 105, 107, 125, 132, 131, 131, 110, 63, 65, 79, 81, 68, 67, 71, 84, 87, 85, 53, 38, 81, 81, 63, 57, 76, 85, 84, 44, 44, 30, 25, 46, 30, 8, 3, 12, 13, 10, 6, 15, 9, 9, 8, 11, 13, 13, 16, 15, 11, 9, 5, 29, 38, 71, 65, 75, 38, 35, 21, 13, 13, 13, 14, 15, 15, 15, 15, 15, 13, 7, 20, 37, 33, 32, 29, 33, 33, 72, 40, 45, 40, 63, 68, 43, 41, 41, 38, 43, 43, 37, 34, 32, 41, 18, 38, 56, 12, 1, 21, 29, 34, 34, 35, 38, 40, 35, 35, 35, 37, 38, 42, 61, 58, 56, 54, 70, 75, 69, 75, 74, 77, 70, 71, 84, 69, 87, 74, 72, 76, 66, 55, 42, 40, 48, 42, 44, 41, 42, 36, 48, 38, 39, 54, 44, 61, 54, 67, 62, 57, 46, 48, 46, 47, 55, 79, 31, 38, 23, 7, 8, 4, 4, 13, 10, 9, 8, 8, 8, 8, 6, 6, 6, 6, 6, 6, 7, 7, 7, 7, 7, 7, 7, 7, 7, 7, 7, 7, 7, 7, 7, 7, 8, 8, 8, 8, 8, 9, 13, 10, 11, 13, 15, 13, 14, 16, 18, 15, 13, 13, 14, 14, 14, 13, 14, 11, 13, 44, 107, 137, 144, 132, 131, 132, 134, 112, 115, 125, 117, 115, 121, 124, 127, 126, 86, 102, 120, 136, 154, 149, 145, 146, 138, 123, 102, 121, 150, 159, 152, 154, 156, 152, 149, 128, 119, 130, 129, 114, 109, 104, 97, 98, 119, 144, 157, 157, 139, 98, 51, 48, 69, 77, 63, 73, 89, 116, 136, 139, 98, 49, 65, 59, 55, 67, 86, 111, 145, 115, 76, 93, 100, 97, 91, 82, 57, 41, 8, 12, 12, 9, 13, 10, 9, 11, 13, 13, 14, 15, 11, 9, 7, 17, 43, 69, 70, 114, 35, 20, 12, 13, 13, 13, 15, 16, 15, 15, 14, 14, 13, 6, 17, 32, 29, 32, 28, 28, 43, 61, 33, 36, 41, 70, 52, 35, 44, 39, 34, 39, 35, 35, 38, 50, 42, 3, 8, 12, 5, 28, 29, 30, 34, 33, 35, 38, 40, 37, 37, 39, 41, 40, 46, 60, 56, 69, 73, 96, 96, 67, 68, 70, 76, 83, 70, 76, 72, 68, 73, 61, 65, 51, 54, 47, 37, 45, 37, 43, 43, 43, 45, 42, 49, 50, 47, 39, 48, 56, 59, 58, 59, 55, 53, 47, 50, 49, 59, 35, 39, 8, 8, 8, 4, 4, 13, 10, 9, 8, 8, 8, 8, 6, 6, 6, 6, 6, 6, 7, 7, 7, 7, 7, 7, 7, 7, 7, 7, 7, 7, 7, 7, 7, 7, 8, 8, 8, 8, 7, 8, 9, 7, 8, 8, 7, 9, 11, 17, 16, 16, 20, 19, 18, 12, 13, 3, 23, 70, 127, 133, 127, 116, 112, 124, 117, 124, 113, 116, 122, 113, 110, 116, 112, 115, 121, 85, 94, 113, 134, 152, 155, 150, 151, 156, 153, 137, 124, 139, 143, 155, 160, 159, 156, 154, 143, 112, 111, 94, 92, 98, 103, 106, 114, 134, 153, 165, 166, 151, 87, 56, 44, 65, 74, 65, 80, 103, 140, 174, 177, 135, 70, 80, 75, 67, 73, 100, 118, 153, 148, 110, 86, 102, 95, 100, 102, 111, 127, 114, 49, 4, 13, 10, 13, 10, 9, 11, 13, 13, 14, 14, 11, 9, 7, 7, 37, 141, 80, 17, 15, 14, 13, 14, 14, 14, 17, 17, 15, 15, 15, 16, 15, 7, 16, 34, 25, 29, 27, 32, 30, 45, 48, 43, 59, 74, 38, 42, 37, 38, 35, 35, 34, 38, 43, 48, 13, 10, 3, 12, 4, 15, 33, 29, 38, 36, 36, 44, 37, 40, 40, 40, 35, 42, 40, 51, 53, 70, 102, 80, 81, 79, 74, 78, 84, 76, 84, 67, 97, 70, 65, 88, 66, 62, 55, 47, 43, 36, 43, 40, 57, 36, 40, 37, 46, 50, 48, 39, 46, 49, 54, 46, 60, 59, 53, 51, 48, 39, 59, 51, 43, 42, 8, 9, 5, 5, 13, 10, 9, 8, 8, 8, 8, 6, 6, 6, 6, 6, 6, 7, 7, 7, 7, 7, 7, 7, 7, 7, 7, 7, 7, 7, 7, 7, 7, 8, 8, 8, 7, 7, 7, 8, 8, 7, 7, 4, 4, 5, 9, 11, 15, 19, 19, 16, 12, 11, 47, 99, 113, 123, 124, 118, 112, 110, 121, 112, 122, 114, 108, 111, 106, 101, 106, 106, 105, 108, 89, 90, 107, 133, 153, 157, 156, 156, 169, 174, 168, 142, 121, 126, 153, 157, 154, 146, 144, 135, 130, 137, 97, 81, 83, 93, 98, 110, 132, 157, 171, 171, 162, 99, 75, 64, 82, 83, 71, 94, 118, 146, 179, 188, 152, 89, 79, 77, 76, 89, 109, 142, 175, 178, 165, 85, 67, 74, 75, 82, 91, 114, 136, 135, 23, 11, 11, 13, 10, 11, 13, 13, 14, 14, 13, 13, 10, 8, 7, 15, 65, 44, 31, 11, 14, 13, 15, 15, 15, 18, 18, 16, 14, 16, 19, 20, 9, 8, 29, 23, 26, 27, 35, 45, 82, 54, 50, 46, 34, 40, 34, 31, 41, 41, 31, 33, 38, 41, 40, 2, 13, 10, 18, 8, 21, 22, 34, 36, 33, 37, 41, 36, 36, 39, 40, 45, 46, 50, 69, 60, 77, 92, 86, 83, 81, 66, 70, 68, 85, 76, 76, 81, 75, 73, 60, 66, 48, 45, 38, 35, 45, 36, 33, 48, 40, 43, 41, 43, 47, 44, 47, 42, 48, 59, 56, 50, 51, 52, 47, 47, 40, 48, 52, 48, 36, 2, 6, 9, 7, 6, 13, 10, 9, 8, 8, 8, 8, 8, 5, 6, 6, 6, 6, 6, 6, 6, 6, 7, 7, 7, 7, 7, 7, 7, 7, 7, 7, 7, 7, 7, 7, 9, 8, 7, 8, 8, 9, 9, 9, 6, 6, 6, 5, 12, 13, 18, 17, 14, 18, 73, 107, 115, 117, 126, 128, 125, 118, 109, 106, 106, 116, 110, 99, 97, 99, 102, 97, 101, 103, 100, 98, 86, 106, 128, 143, 159, 159, 157, 172, 181, 188, 167, 121, 122, 146, 150, 145, 125, 121, 125, 136, 146, 93, 79, 87, 100, 110, 121, 139, 162, 177, 185, 172, 115, 80, 85, 98, 90, 77, 94, 121, 142, 169, 190, 162, 103, 86, 82, 87, 98, 128, 155, 200, 194, 188, 118, 66, 71, 71, 63, 71, 100, 121, 151, 68, 9, 15, 6, 11, 13, 13, 13, 13, 13, 11, 9, 8, 8, 13, 24, 15, 15, 14, 13, 16, 15, 15, 15, 15, 15, 13, 16, 23, 17, 17, 4, 22, 23, 26, 30, 62, 53, 80, 54, 37, 40, 33, 39, 38, 34, 36, 35, 30, 35, 42, 41, 11, 13, 10, 12, 12, 17, 27, 28, 33, 35, 38, 36, 35, 36, 36, 39, 41, 43, 52, 58, 83, 95, 88, 96, 78, 94, 74, 73, 71, 77, 75, 71, 72, 69, 68, 58, 59, 55, 44, 39, 33, 32, 37, 31, 35, 44, 32, 33, 36, 45, 45, 40, 54, 45, 52, 43, 56, 49, 57, 48, 43, 42, 39, 43, 46, 54, 20, 7, 6, 9, 8, 8, 9, 8, 8, 8, 8, 8, 8, 7, 6, 6, 6, 6, 6, 6, 6, 6, 7, 7, 7, 7, 7, 7, 7, 7, 7, 7, 7, 7, 7, 7, 9, 9, 8, 8, 8, 9, 9, 9, 7, 7, 7, 7, 7, 7, 9, 15, 17, 80, 117, 117, 117, 119, 125, 128, 119, 112, 105, 97, 110, 114, 104, 95, 88, 90, 104, 98, 100, 97, 109, 117, 95, 111, 130, 148, 156, 157, 162, 172, 184, 191, 176, 127, 113, 126, 126, 117, 110, 122, 136, 150, 144, 90, 85, 96, 108, 113, 120, 141, 164, 178, 194, 187, 143, 93, 113, 119, 115, 91, 101, 126, 144, 165, 189, 156, 93, 95, 94, 93, 105, 131, 161, 198, 203, 202, 138, 60, 69, 79, 69, 72, 98, 137, 166, 146, 60, 11, 13, 11, 13, 13, 13, 13, 13, 12, 11, 11, 11, 13, 13, 12, 13, 13, 13, 13, 14, 16, 14, 14, 14, 13, 13, 17, 19, 21, 6, 13, 23, 23, 31, 58, 55, 56, 42, 34, 37, 36, 37, 33, 33, 37, 31, 32, 35, 43, 27, 14, 12, 13, 9, 20, 26, 28, 33, 35, 39, 36, 37, 36, 37, 39, 43, 49, 51, 63, 94, 93, 80, 86, 71, 78, 75, 63, 63, 61, 60, 52, 63, 67, 60, 47, 52, 46, 43, 34, 34, 34, 31, 31, 32, 41, 33, 31, 38, 43, 37, 46, 43, 44, 50, 43, 47, 45, 45, 41, 39, 40, 39, 42, 42, 60, 8, 4, 7, 9, 13, 10, 13, 10, 8, 8, 8, 8, 8, 8, 8, 13, 10, 7, 7, 7, 7, 6, 6, 6, 6, 7, 7, 7, 7, 7, 7, 7, 7, 7, 7, 7, 7, 7, 7, 9, 9, 8, 8, 8, 9, 9, 9, 9, 9, 9, 13, 10, 9, 13, 3, 9, 81, 123, 119, 118, 114, 116, 120, 121, 115, 106, 100, 105, 101, 101, 93, 86, 82, 82, 104, 103, 105, 108, 124, 129, 104, 106, 123, 148, 154, 152, 157, 165, 176, 183, 173, 142, 115, 109, 100, 99, 107, 120, 131, 150, 144, 97, 95, 105, 109, 108, 123, 146, 171, 181, 202, 202, 165, 105, 140, 149, 141, 113, 120, 134, 153, 176, 192, 148, 89, 116, 110, 96, 113, 139, 162, 187, 210, 213, 130, 58, 80, 86, 79, 87, 113, 157, 184, 192, 157, 89, 14, 11, 13, 13, 13, 13, 13, 13, 13, 14, 14, 12, 12, 12, 12, 12, 12, 12, 13, 16, 14, 13, 13, 12, 9, 13, 17, 17, 9, 7, 19, 26, 28, 42, 48, 51, 39, 39, 30, 32, 34, 31, 30, 42, 35, 36, 42, 39, 13, 17, 15, 13, 9, 23, 30, 29, 33, 35, 38, 37, 38, 35, 35, 40, 52, 46, 69, 72, 97, 98, 99, 78, 74, 62, 64, 60, 80, 61, 67, 56, 68, 53, 52, 44, 42, 43, 38, 32, 35, 37, 33, 32, 34, 32, 31, 44, 45, 43, 40, 42, 34, 39, 42, 46, 39, 40, 36, 38, 38, 41, 41, 45, 41, 46, 3, 6, 8, 9, 11, 12, 8, 8, 8, 8, 8, 8, 9, 9, 7, 8, 8, 8, 6, 6, 6, 6, 7, 7, 7, 7, 7, 7, 7, 7, 7, 7, 7, 7, 7, 7, 9, 9, 8, 8, 8, 9, 9, 9, 13, 10, 13, 10, 13, 10, 8, 8, 7, 3, 58, 118, 119, 118, 122, 110, 108, 111, 109, 105, 97, 91, 97, 101, 92, 73, 65, 62, 70, 101, 105, 113, 124, 138, 151, 121, 99, 108, 127, 144, 143, 141, 144, 158, 160, 153, 145, 125, 84, 79, 88, 101, 113, 127, 159, 154, 102, 100, 109, 109, 111, 127, 150, 174, 185, 209, 214, 180, 132, 156, 165, 154, 123, 130, 142, 162, 183, 199, 144, 104, 125, 127, 120, 125, 145, 162, 177, 212, 219, 118, 54, 82, 104, 84, 98, 124, 159, 201, 205, 188, 158, 15, 11, 13, 13, 11, 12, 13, 13, 15, 15, 15, 11, 12, 13, 12, 12, 12, 12, 13, 14, 13, 12, 12, 13, 10, 9, 14, 13, 13, 9, 7, 9, 19, 21, 28, 40, 48, 39, 42, 33, 32, 33, 31, 31, 44, 40, 37, 42, 21, 16, 19, 16, 12, 13, 10, 27, 34, 31, 34, 34, 37, 39, 40, 34, 34, 41, 55, 74, 73, 71, 74, 88, 108, 78, 71, 67, 66, 63, 57, 56, 57, 56, 65, 54, 49, 47, 42, 42, 35, 35, 37, 35, 32, 33, 33, 25, 38, 48, 37, 39, 43, 39, 40, 40, 42, 47, 41, 42, 43, 43, 43, 45, 46, 45, 40, 43, 7, 7, 6, 9, 12, 12, 8, 8, 8, 8, 8, 8, 13, 8, 7, 7, 8, 7, 6, 6, 6, 6, 7, 7, 7, 7, 7, 7, 7, 7, 7, 7, 7, 7, 7, 7, 9, 9, 9, 9, 8, 9, 9, 9, 13, 11, 11, 13, 10, 9, 22, 46, 70, 114, 113, 109, 114, 106, 104, 105, 103, 91, 82, 77, 89, 88, 88, 84, 73, 69, 73, 96, 102, 112, 133, 143, 160, 141, 103, 102, 113, 129, 134, 131, 129, 137, 134, 128, 128, 116, 79, 90, 95, 106, 120, 128, 162, 155, 106, 108, 116, 122, 122, 129, 149, 174, 192, 215, 216, 169, 147, 149, 168, 163, 127, 150, 172, 187, 185, 198, 139, 122, 137, 140, 138, 137, 144, 164, 175, 212, 216, 99, 65, 92, 111, 89, 98, 121, 151, 190, 203, 190, 165, 17, 11, 13, 13, 11, 11, 13, 13, 14, 14, 16, 12, 13, 14, 13, 13, 13, 13, 13, 13, 12, 12, 12, 11, 9, 12, 15, 14, 13, 10, 7, 3, 8, 14, 22, 38, 35, 47, 49, 37, 29, 34, 33, 35, 42, 42, 37, 26, 3, 19, 18, 15, 11, 13, 10, 30, 36, 32, 35, 34, 36, 40, 42, 35, 38, 43, 49, 73, 79, 81, 63, 83, 104, 76, 61, 67, 63, 61, 56, 53, 57, 61, 54, 61, 48, 47, 44, 41, 34, 40, 38, 35, 34, 33, 29, 30, 35, 34, 38, 38, 41, 45, 45, 45, 47, 43, 49, 44, 47, 49, 49, 51, 53, 49, 45, 43, 9, 8, 7, 9, 12, 12, 8, 8, 8, 8, 8, 8, 19, 11, 4, 5, 5, 5, 6, 7, 7, 7, 6, 6, 6, 7, 7, 7, 7, 7, 7, 7, 7, 7, 8, 8, 8, 8, 13, 10, 13, 10, 8, 9, 9, 9, 19, 18, 9, 11, 50, 58, 60, 100, 111, 101, 101, 111, 106, 105, 97, 79, 72, 77, 64, 70, 85, 99, 97, 93, 88, 83, 88, 103, 110, 127, 151, 156, 117, 84, 134, 131, 125, 122, 128, 127, 122, 109, 104, 106, 82, 96, 105, 114, 120, 128, 154, 148, 100, 116, 125, 124, 123, 137, 151, 185, 225, 225, 199, 134, 145, 174, 192, 172, 152, 176, 208, 210, 191, 169, 139, 138, 148, 151, 142, 139, 162, 182, 197, 211, 182, 77, 86, 122, 133, 94, 96, 111, 139, 178, 201, 184, 156, 93, 30, 15, 8, 13, 10, 11, 11, 11, 11, 11, 11, 13, 13, 13, 13, 13, 13, 13, 13, 13, 12, 12, 12, 12, 12, 12, 12, 13, 13, 13, 15, 13, 8, 16, 33, 38, 43, 50, 38, 36, 43, 43, 37, 42, 47, 51, 11, 8, 15, 17, 12, 8, 8, 32, 35, 31, 35, 35, 37, 40, 42, 37, 50, 60, 50, 55, 69, 81, 73, 73, 90, 90, 57, 64, 60, 51, 49, 47, 55, 57, 49, 43, 41, 41, 43, 37, 33, 35, 36, 34, 31, 27, 22, 26, 43, 45, 42, 49, 53, 59, 59, 58, 57, 58, 58, 55, 53, 46, 53, 54, 63, 61, 55, 17, 11, 13, 10, 13, 10, 13, 10, 8, 8, 8, 8, 8, 8, 8, 8, 16, 15, 13, 10, 4, 6, 7, 7, 7, 7, 7, 6, 6, 6, 7, 7, 7, 7, 7, 7, 7, 7, 7, 8, 8, 8, 7, 3, 3, 3, 5, 5, 5, 4, 1, 3, 31, 58, 68, 86, 91, 86, 94, 90, 96, 107, 104, 99, 86, 81, 78, 68, 66, 71, 83, 96, 104, 93, 91, 76, 84, 106, 112, 128, 117, 130, 87, 76, 102, 129, 121, 96, 102, 104, 115, 111, 118, 113, 88, 98, 105, 109, 114, 131, 157, 149, 103, 121, 130, 131, 132, 142, 159, 193, 225, 210, 175, 132, 158, 195, 210, 183, 158, 183, 212, 216, 183, 156, 164, 145, 167, 165, 155, 162, 176, 191, 211, 202, 137, 91, 123, 135, 134, 113, 108, 106, 139, 170, 193, 193, 182, 174, 126, 12, 9, 14, 11, 11, 11, 11, 11, 11, 13, 13, 13, 13, 13, 13, 13, 13, 13, 12, 12, 12, 12, 12, 12, 12, 13, 13, 13, 15, 13, 10, 6, 17, 45, 44, 44, 48, 38, 38, 46, 42, 40, 34, 11, 4, 13, 10, 12, 17, 12, 8, 13, 10, 35, 37, 31, 33, 35, 36, 41, 42, 38, 62, 63, 71, 88, 85, 70, 102, 95, 59, 71, 55, 58, 51, 48, 42, 46, 44, 45, 45, 42, 50, 47, 42, 41, 38, 34, 30, 35, 33, 35, 39, 38, 64, 67, 73, 80, 90, 97, 94, 92, 93, 96, 100, 83, 78, 79, 77, 78, 79, 66, 3, 9, 11, 13, 10, 13, 10, 13, 10, 8, 8, 8, 8, 8, 8, 8, 8, 17, 14, 15, 9, 7, 9, 8, 7, 7, 7, 6, 6, 6, 7, 7, 7, 7, 7, 7, 7, 7, 7, 8, 8, 8, 6, 1, 1, 3, 4, 5, 5, 1, 39, 65, 72, 75, 85, 86, 80, 73, 79, 92, 109, 93, 88, 87, 73, 61, 51, 57, 66, 77, 84, 93, 89, 83, 71, 98, 118, 118, 69, 29, 93, 89, 80, 99, 109, 92, 91, 105, 115, 129, 135, 142, 138, 95, 95, 101, 103, 116, 137, 160, 146, 108, 131, 145, 146, 139, 144, 161, 189, 200, 188, 146, 154, 183, 222, 220, 192, 162, 174, 193, 204, 170, 169, 161, 171, 196, 183, 185, 185, 199, 208, 223, 177, 93, 123, 145, 142, 135, 130, 116, 120, 144, 167, 186, 188, 186, 162, 111, 6, 13, 10, 11, 11, 11, 11, 11, 11, 11, 13, 13, 13, 13, 13, 13, 13, 13, 13, 12, 12, 12, 12, 12, 12, 12, 13, 13, 13, 13, 13, 10, 7, 8, 5, 30, 50, 35, 46, 61, 45, 38, 42, 39, 16, 8, 14, 8, 11, 17, 12, 8, 12, 34, 36, 32, 31, 35, 34, 43, 47, 41, 47, 56, 59, 68, 69, 73, 71, 97, 69, 61, 50, 50, 51, 44, 38, 39, 34, 41, 38, 49, 46, 42, 41, 40, 39, 34, 25, 33, 41, 44, 52, 79, 113, 114, 117, 152, 153, 149, 135, 135, 136, 133, 131, 116, 116, 113, 103, 109, 88, 17, 7, 9, 11, 11, 13, 10, 13, 10, 8, 8, 8, 8, 8, 8, 8, 8, 15, 18, 16, 13, 13, 10, 13, 10, 8, 7, 7, 7, 6, 6, 6, 7, 7, 7, 7, 7, 7, 7, 7, 7, 8, 8, 8, 8, 6, 7, 7, 8, 8, 13, 10, 37, 68, 77, 80, 81, 88, 95, 83, 80, 69, 82, 98, 77, 63, 47, 27, 7, 5, 7, 12, 18, 21, 24, 25, 15, 9, 40, 78, 59, 11, 6, 9, 8, 13, 67, 107, 120, 120, 120, 126, 127, 134, 127, 144, 93, 93, 101, 111, 126, 143, 162, 141, 113, 141, 149, 149, 143, 140, 160, 174, 176, 155, 131, 182, 211, 235, 232, 191, 165, 166, 168, 162, 175, 189, 174, 179, 228, 203, 194, 200, 230, 222, 226, 129, 99, 149, 158, 152, 134, 139, 119, 136, 161, 179, 195, 190, 160, 21, 14, 15, 13, 11, 11, 11, 11, 11, 11, 11, 13, 13, 13, 13, 13, 13, 13, 13, 13, 12, 12, 12, 12, 12, 12, 12, 13, 13, 13, 13, 13, 12, 9, 12, 13, 10, 17, 11, 23, 41, 35, 19, 21, 20, 14, 13, 12, 9, 12, 17, 12, 8, 14, 32, 33, 33, 30, 36, 33, 45, 54, 42, 52, 50, 72, 71, 65, 84, 67, 94, 80, 66, 53, 48, 55, 37, 38, 38, 35, 45, 36, 38, 36, 37, 36, 33, 34, 36, 38, 48, 64, 82, 103, 124, 133, 137, 138, 161, 162, 164, 162, 158, 157, 159, 153, 140, 127, 128, 128, 103, 32, 8, 13, 12, 13, 10, 13, 10, 13, 10, 13, 10, 8, 8, 8, 8, 8, 8, 8, 8, 5, 17, 20, 17, 16, 13, 10, 8, 9, 9, 7, 7, 7, 7, 7, 7, 7, 7, 7, 7, 8, 8, 8, 8, 8, 8, 9, 14, 13, 14, 14, 9, 16, 30, 75, 82, 81, 76, 72, 72, 80, 99, 88, 74, 81, 78, 23, 2, 1, 7, 14, 17, 9, 9, 9, 9, 11, 14, 15, 16, 16, 11, 8, 6, 8, 22, 61, 99, 123, 132, 126, 122, 125, 125, 123, 128, 129, 143, 84, 88, 104, 119, 133, 152, 164, 133, 112, 141, 149, 156, 154, 158, 179, 169, 160, 124, 140, 207, 226, 240, 229, 184, 166, 155, 163, 144, 166, 188, 194, 190, 229, 212, 194, 183, 212, 219, 201, 125, 124, 156, 179, 167, 140, 119, 105, 158, 181, 198, 204, 194, 154, 20, 13, 10, 14, 16, 12, 12, 12, 12, 12, 12, 12, 14, 14, 14, 14, 14, 14, 13, 13, 13, 12, 12, 12, 12, 13, 13, 13, 13, 13, 13, 13, 13, 13, 14, 16, 17, 14, 29, 13, 10, 8, 11, 17, 23, 27, 17, 19, 14, 12, 11, 15, 11, 8, 20, 34, 34, 30, 32, 31, 30, 36, 66, 42, 75, 68, 76, 86, 91, 85, 71, 59, 95, 61, 43, 50, 49, 36, 39, 38, 40, 37, 30, 28, 33, 32, 30, 36, 32, 43, 63, 99, 116, 135, 148, 152, 149, 152, 153, 176, 173, 183, 176, 170, 170, 163, 160, 147, 135, 74, 53, 18, 15, 13, 13, 13, 10, 9, 8, 8, 8, 8, 8, 7, 7, 7, 13, 10, 7, 9, 17, 11, 21, 21, 15, 7, 5, 8, 9, 7, 7, 7, 7, 7, 7, 7, 7, 7, 7, 8, 8, 8, 8, 8, 8, 13, 10, 16, 13, 13, 10, 5, 4, 38, 64, 90, 91, 84, 83, 81, 81, 97, 113, 104, 101, 104, 77, 7, 4, 11, 16, 21, 23, 15, 14, 13, 10, 13, 10, 12, 16, 20, 23, 24, 21, 15, 5, 49, 97, 118, 110, 121, 128, 120, 125, 127, 120, 119, 127, 123, 134, 82, 87, 104, 121, 137, 153, 158, 131, 112, 132, 156, 159, 157, 166, 194, 169, 148, 114, 150, 212, 228, 237, 227, 169, 149, 142, 150, 133, 159, 169, 183, 191, 197, 193, 174, 163, 179, 176, 148, 165, 151, 165, 193, 191, 162, 121, 119, 181, 202, 209, 212, 197, 136, 28, 15, 11, 13, 13, 12, 12, 12, 12, 12, 12, 14, 14, 14, 14, 14, 14, 13, 13, 13, 12, 12, 12, 12, 13, 13, 13, 13, 13, 13, 15, 15, 13, 17, 18, 29, 19, 28, 26, 18, 33, 23, 12, 20, 17, 17, 14, 13, 12, 15, 12, 7, 21, 33, 32, 30, 32, 31, 31, 33, 38, 38, 81, 83, 75, 82, 125, 111, 66, 58, 69, 52, 57, 45, 47, 35, 35, 31, 32, 27, 26, 25, 31, 33, 38, 41, 43, 56, 93, 125, 139, 149, 160, 161, 163, 154, 161, 173, 175, 185, 181, 164, 160, 114, 132, 152, 131, 38, 19, 18, 14, 12, 13, 10, 13, 10, 9, 8, 8, 8, 8, 8, 7, 7, 7, 13, 10, 8, 12, 51, 24, 11, 13, 16, 8, 6, 9, 9, 7, 8, 8, 8, 7, 7, 7, 7, 7, 7, 8, 8, 8, 8, 8, 8, 9, 7, 3, 2, 13, 35, 64, 81, 85, 86, 73, 86, 100, 112, 132, 136, 119, 86, 102, 75, 9, 11, 18, 14, 15, 16, 17, 12, 8, 7, 13, 10, 14, 19, 20, 19, 13, 4, 49, 98, 112, 105, 107, 116, 120, 110, 114, 108, 103, 109, 117, 113, 118, 86, 93, 108, 119, 138, 150, 160, 128, 112, 129, 156, 162, 160, 173, 183, 174, 148, 124, 155, 218, 230, 238, 220, 173, 132, 144, 135, 119, 151, 163, 179, 191, 184, 178, 157, 151, 147, 142, 143, 179, 186, 172, 183, 195, 184, 164, 185, 219, 215, 211, 205, 189, 137, 30, 14, 13, 10, 18, 13, 12, 12, 12, 12, 12, 12, 14, 14, 14, 14, 14, 14, 13, 13, 13, 13, 13, 13, 13, 13, 13, 13, 13, 13, 13, 16, 15, 13, 16, 14, 20, 20, 15, 17, 21, 33, 16, 16, 13, 14, 13, 14, 14, 14, 15, 12, 8, 22, 31, 30, 29, 31, 30, 34, 36, 50, 56, 80, 116, 119, 73, 139, 139, 86, 60, 63, 56, 61, 54, 39, 35, 33, 29, 25, 23, 27, 33, 40, 45, 53, 66, 69, 85, 119, 134, 143, 149, 150, 153, 128, 115, 146, 160, 163, 161, 150, 129, 56, 15, 65, 115, 35, 11, 20, 8, 13, 10, 8, 7, 13, 10, 9, 8, 8, 8, 8, 8, 7, 7, 7, 9, 9, 17, 71, 56, 27, 6, 11, 13, 10, 13, 11, 8, 9, 9, 9, 9, 7, 7, 7, 7, 7, 7, 8, 8, 8, 8, 8, 8, 7, 3, 11, 26, 47, 56, 68, 76, 68, 74, 75, 83, 96, 105, 126, 143, 125, 102, 18, 20, 13, 10, 5, 12, 9, 8, 6, 15, 11, 5, 3, 6, 12, 14, 11, 15, 14, 35, 87, 82, 102, 97, 97, 109, 111, 98, 102, 97, 91, 88, 95, 104, 110, 89, 98, 108, 120, 141, 151, 152, 134, 117, 139, 152, 166, 166, 173, 187, 182, 161, 129, 160, 217, 229, 235, 215, 168, 136, 150, 131, 123, 140, 154, 175, 187, 188, 168, 159, 143, 133, 152, 143, 180, 198, 175, 176, 203, 218, 214, 218, 216, 219, 208, 192, 176, 154, 47, 109, 32, 19, 12, 12, 12, 12, 12, 12, 12, 14, 14, 14, 14, 14, 14, 13, 13, 13, 14, 14, 14, 14, 13, 13, 13, 13, 13, 13, 17, 16, 13, 11, 13, 9, 8, 18, 23, 22, 13, 10, 19, 19, 11, 9, 12, 13, 14, 16, 15, 12, 8, 22, 29, 29, 29, 30, 29, 35, 39, 43, 52, 70, 100, 130, 105, 130, 131, 61, 61, 51, 48, 46, 65, 32, 32, 28, 25, 25, 29, 34, 45, 54, 61, 72, 87, 74, 88, 100, 113, 129, 146, 152, 137, 37, 22, 70, 125, 151, 136, 122, 112, 15, 12, 13, 10, 11, 16, 6, 2, 5, 7, 6, 6, 13, 10, 9, 8, 8, 8, 8, 8, 7, 7, 7, 9, 9, 21, 87, 76, 61, 31, 9, 19, 16, 11, 1, 3, 6, 12, 16, 6, 6, 5, 3, 3, 2, 1, 1, 16, 18, 9, 1, 19, 19, 22, 34, 45, 53, 48, 73, 80, 82, 92, 81, 93, 145, 149, 124, 42, 15, 18, 6, 6, 8, 13, 10, 13, 10, 13, 10, 1, 7, 19, 20, 15, 6, 1, 18, 47, 49, 79, 87, 89, 98, 90, 89, 91, 96, 102, 98, 90, 81, 97, 94, 98, 82, 96, 116, 135, 151, 137, 126, 130, 139, 149, 144, 168, 180, 182, 181, 192, 200, 164, 141, 207, 222, 229, 204, 164, 167, 158, 147, 123, 131, 151, 174, 197, 196, 188, 173, 148, 138, 176, 171, 168, 164, 162, 194, 232, 227, 227, 218, 219, 220, 213, 202, 171, 155, 170, 170, 40, 18, 16, 14, 15, 16, 15, 19, 15, 22, 23, 29, 24, 17, 11, 8, 9, 11, 15, 16, 13, 13, 9, 11, 13, 13, 10, 14, 14, 13, 13, 13, 13, 13, 13, 13, 13, 13, 14, 20, 22, 18, 17, 13, 16, 17, 18, 16, 13, 12, 11, 31, 31, 30, 33, 40, 39, 44, 44, 50, 47, 86, 131, 139, 115, 82, 101, 46, 52, 48, 59, 61, 53, 36, 14, 18, 21, 32, 37, 51, 65, 76, 101, 137, 141, 36, 72, 69, 106, 115, 121, 123, 42, 16, 17, 17, 21, 20, 18, 18, 17, 14, 13, 12, 12, 12, 11, 11, 13, 10, 11, 11, 11, 13, 10, 9, 8, 8, 8, 8, 8, 7, 7, 7, 9, 8, 22, 126, 92, 76, 61, 32, 8, 16, 20, 14, 6, 6, 13, 10, 9, 8, 8, 6, 5, 4, 3, 3, 3, 15, 18, 4, 25, 36, 39, 33, 26, 34, 50, 55, 67, 87, 92, 78, 100, 128, 144, 113, 88, 17, 16, 15, 13, 10, 11, 12, 15, 16, 16, 16, 17, 19, 13, 2, 17, 39, 62, 90, 87, 61, 71, 89, 93, 90, 91, 94, 98, 104, 99, 94, 88, 80, 91, 97, 107, 92, 105, 128, 154, 167, 151, 135, 139, 138, 146, 151, 171, 189, 194, 190, 197, 208, 190, 143, 192, 212, 218, 197, 171, 169, 181, 183, 145, 129, 151, 170, 183, 198, 201, 189, 166, 142, 167, 171, 166, 170, 209, 215, 225, 229, 229, 219, 212, 210, 204, 196, 156, 156, 173, 167, 19, 11, 13, 10, 8, 7, 7, 9, 4, 13, 10, 12, 17, 17, 13, 8, 4, 7, 9, 13, 10, 14, 16, 16, 14, 13, 13, 14, 13, 12, 15, 13, 13, 13, 13, 13, 13, 12, 11, 11, 12, 17, 18, 15, 13, 15, 21, 18, 19, 16, 11, 12, 14, 36, 25, 29, 35, 38, 39, 55, 42, 55, 45, 100, 131, 120, 114, 122, 83, 47, 57, 59, 48, 48, 43, 27, 19, 20, 27, 36, 49, 33, 2, 28, 97, 133, 151, 110, 21, 13, 19, 18, 18, 13, 18, 18, 18, 20, 17, 18, 19, 19, 17, 15, 15, 15, 15, 15, 13, 12, 11, 11, 11, 11, 13, 10, 9, 8, 8, 8, 8, 8, 7, 7, 7, 6, 12, 24, 182, 141, 88, 66, 66, 36, 4, 13, 10, 21, 17, 8, 5, 7, 8, 8, 8, 8, 8, 8, 8, 3, 4, 14, 16, 33, 28, 30, 20, 33, 41, 51, 63, 91, 97, 94, 114, 155, 168, 135, 81, 20, 11, 18, 17, 17, 18, 19, 19, 18, 17, 25, 14, 4, 14, 40, 63, 72, 91, 106, 105, 83, 77, 86, 104, 100, 99, 103, 104, 106, 95, 89, 84, 79, 97, 123, 108, 111, 117, 138, 163, 180, 170, 162, 162, 140, 132, 147, 174, 200, 194, 195, 205, 211, 201, 156, 170, 193, 202, 185, 174, 171, 210, 212, 168, 136, 143, 161, 168, 196, 212, 208, 180, 140, 148, 154, 169, 186, 209, 217, 226, 223, 216, 213, 204, 196, 190, 183, 137, 139, 152, 91, 24, 19, 13, 3, 9, 16, 16, 21, 19, 11, 12, 14, 1, 5, 7, 7, 7, 12, 13, 12, 8, 11, 12, 16, 18, 14, 13, 13, 13, 13, 13, 13, 11, 13, 10, 13, 10, 13, 10, 12, 13, 11, 15, 15, 18, 17, 18, 15, 9, 12, 14, 38, 27, 28, 37, 46, 45, 43, 42, 52, 53, 79, 125, 138, 176, 146, 81, 50, 77, 48, 57, 40, 28, 27, 24, 28, 26, 13, 4, 1, 9, 9, 23, 64, 89, 48, 24, 16, 16, 20, 19, 23, 18, 20, 21, 23, 22, 20, 17, 17, 16, 15, 16, 18, 17, 16, 15, 13, 11, 11, 11, 11, 13, 10, 9, 8, 8, 8, 8, 8, 7, 7, 7, 5, 17, 25, 181, 185, 141, 100, 76, 69, 36, 14, 15, 17, 16, 9, 5, 9, 13, 10, 13, 10, 11, 12, 12, 11, 6, 5, 11, 14, 12, 30, 29, 30, 27, 34, 50, 71, 89, 81, 100, 127, 162, 159, 103, 34, 18, 18, 16, 17, 18, 22, 24, 24, 36, 28, 18, 15, 13, 34, 51, 63, 70, 84, 104, 114, 112, 97, 86, 73, 85, 98, 101, 96, 97, 100, 94, 87, 86, 88, 113, 134, 108, 116, 116, 137, 163, 184, 182, 191, 188, 156, 129, 140, 181, 205, 188, 193, 204, 216, 202, 167, 149, 169, 186, 176, 166, 172, 217, 213, 172, 140, 138, 156, 164, 189, 209, 212, 180, 135, 135, 150, 165, 189, 211, 213, 208, 206, 194, 184, 173, 172, 158, 144, 114, 119, 116, 105, 102, 90, 79, 74, 63, 70, 64, 65, 69, 71, 76, 92, 115, 77, 62, 66, 58, 32, 13, 12, 16, 23, 17, 13, 18, 16, 16, 20, 13, 13, 13, 13, 13, 13, 11, 11, 11, 11, 13, 10, 13, 10, 11, 14, 13, 12, 15, 15, 13, 9, 13, 10, 13, 10, 37, 39, 27, 36, 42, 49, 61, 44, 56, 64, 88, 186, 178, 138, 165, 92, 76, 52, 63, 29, 23, 21, 15, 29, 30, 12, 2, 5, 7, 13, 16, 21, 33, 24, 14, 14, 19, 19, 21, 22, 20, 17, 21, 24, 26, 26, 23, 19, 17, 16, 16, 18, 19, 18, 16, 17, 14, 12, 11, 11, 11, 13, 10, 9, 8, 8, 8, 8, 8, 7, 7, 7, 8, 20, 24, 192, 190, 189, 149, 97, 81, 67, 43, 13, 11, 16, 16, 6, 7, 8, 9, 12, 13, 13, 13, 7, 5, 9, 11, 19, 27, 31, 29, 34, 56, 95, 82, 97, 97, 152, 169, 131, 77, 25, 13, 10, 13, 13, 11, 16, 16, 25, 24, 25, 21, 19, 15, 15, 42, 51, 58, 73, 89, 102, 107, 116, 127, 92, 95, 78, 68, 78, 85, 77, 86, 88, 89, 85, 91, 98, 115, 136, 136, 116, 108, 127, 160, 178, 180, 203, 206, 177, 140, 145, 187, 206, 186, 186, 200, 214, 200, 169, 129, 149, 168, 164, 157, 170, 206, 192, 149, 130, 139, 157, 168, 175, 193, 202, 163, 120, 119, 139, 156, 183, 189, 182, 156, 149, 158, 159, 160, 158, 159, 156, 114, 99, 108, 105, 107, 103, 92, 98, 99, 100, 85, 68, 77, 82, 94, 105, 123, 136, 105, 85, 78, 74, 70, 81, 90, 104, 105, 98, 108, 95, 15, 20, 11, 11, 15, 13, 13, 13, 11, 13, 10, 11, 11, 13, 10, 13, 10, 11, 12, 12, 12, 12, 13, 12, 7, 11, 13, 10, 30, 40, 27, 34, 46, 54, 43, 43, 60, 71, 121, 158, 155, 136, 155, 130, 73, 68, 39, 28, 25, 17, 17, 36, 20, 2, 7, 13, 18, 13, 13, 16, 20, 19, 14, 14, 17, 21, 26, 23, 21, 22, 22, 23, 27, 28, 24, 19, 20, 17, 15, 17, 18, 18, 16, 19, 14, 11, 11, 13, 10, 13, 10, 9, 9, 7, 8, 8, 8, 8, 7, 8, 8, 12, 23, 22, 192, 194, 194, 200, 161, 103, 79, 76, 48, 19, 9, 18, 17, 13, 5, 5, 9, 12, 12, 13, 7, 4, 13, 6, 22, 30, 35, 38, 48, 67, 85, 93, 125, 150, 138, 82, 45, 20, 8, 9, 11, 14, 11, 17, 13, 15, 17, 12, 12, 11, 36, 31, 45, 51, 65, 81, 94, 105, 88, 92, 95, 101, 103, 73, 59, 66, 73, 76, 72, 69, 76, 83, 94, 103, 123, 146, 157, 130, 108, 115, 151, 169, 176, 204, 210, 193, 154, 161, 194, 201, 183, 175, 192, 204, 198, 177, 123, 144, 155, 148, 142, 165, 178, 169, 126, 109, 135, 158, 173, 163, 181, 190, 142, 104, 114, 126, 142, 144, 136, 130, 129, 145, 165, 170, 168, 162, 166, 153, 111, 92, 100, 104, 102, 98, 94, 96, 103, 107, 105, 78, 72, 83, 99, 111, 120, 140, 135, 119, 103, 82, 91, 94, 97, 104, 122, 149, 157, 167, 60, 15, 15, 13, 10, 15, 13, 13, 13, 12, 11, 13, 10, 13, 10, 11, 11, 11, 12, 12, 12, 12, 12, 12, 9, 11, 11, 23, 32, 29, 34, 45, 51, 48, 55, 56, 83, 129, 119, 118, 134, 146, 133, 75, 39, 28, 27, 22, 17, 20, 30, 8, 9, 11, 15, 17, 15, 14, 13, 13, 14, 13, 12, 16, 19, 24, 23, 30, 28, 23, 24, 27, 33, 35, 26, 23, 21, 17, 15, 16, 17, 16, 16, 14, 11, 13, 10, 13, 10, 9, 9, 8, 7, 8, 8, 8, 8, 7, 8, 9, 16, 22, 16, 192, 194, 197, 192, 200, 162, 109, 87, 80, 48, 19, 8, 18, 19, 13, 10, 3, 5, 7, 13, 10, 11, 4, 4, 14, 5, 26, 32, 36, 51, 67, 90, 89, 95, 90, 65, 31, 21, 11, 7, 4, 7, 14, 16, 9, 14, 24, 27, 37, 35, 24, 35, 49, 24, 26, 43, 57, 76, 79, 86, 68, 80, 94, 109, 105, 65, 53, 65, 75, 75, 67, 59, 62, 71, 84, 104, 126, 151, 167, 146, 124, 114, 146, 166, 171, 193, 208, 205, 182, 181, 197, 194, 171, 160, 179, 196, 189, 171, 133, 147, 151, 138, 138, 164, 165, 156, 127, 111, 135, 154, 166, 149, 164, 169, 135, 106, 127, 137, 140, 115, 118, 123, 130, 151, 172, 174, 171, 168, 169, 159, 128, 98, 92, 96, 91, 91, 89, 93, 111, 126, 128, 113, 83, 76, 91, 112, 112, 121, 136, 137, 137, 95, 109, 109, 116, 115, 113, 122, 155, 161, 128, 42, 13, 14, 12, 13, 13, 13, 11, 11, 11, 11, 11, 11, 11, 12, 12, 12, 12, 12, 12, 13, 10, 12, 13, 20, 28, 27, 30, 35, 39, 44, 59, 81, 88, 122, 99, 82, 79, 107, 86, 45, 30, 31, 26, 23, 25, 20, 16, 6, 11, 12, 13, 14, 13, 12, 12, 13, 14, 14, 15, 18, 21, 19, 18, 22, 21, 20, 23, 23, 20, 27, 26, 23, 24, 21, 14, 14, 14, 14, 13, 12, 11, 13, 10, 9, 8, 9, 8, 7, 8, 8, 8, 8, 7, 8, 9, 14, 18, 11, 197, 196, 200, 209, 198, 202, 168, 114, 86, 79, 51, 19, 8, 13, 18, 13, 10, 7, 5, 9, 8, 2, 2, 13, 10, 9, 16, 41, 48, 69, 76, 69, 63, 39, 21, 9, 13, 10, 11, 9, 6, 5, 8, 16, 17, 13, 24, 50, 48, 32, 28, 47, 44, 51, 33, 41, 60, 68, 69, 59, 54, 72, 83, 94, 107, 109, 81, 74, 85, 86, 74, 66, 62, 58, 59, 72, 104, 124, 148, 166, 165, 128, 133, 146, 161, 163, 173, 199, 209, 204, 191, 190, 185, 159, 148, 165, 175, 177, 167, 148, 149, 144, 139, 146, 165, 172, 171, 158, 113, 134, 146, 147, 151, 163, 160, 140, 135, 156, 173, 164, 126, 112, 125, 138, 148, 166, 168, 172, 172, 170, 167, 139, 109, 76, 86, 85, 92, 93, 105, 131, 153, 152, 146, 112, 79, 81, 93, 95, 102, 117, 150, 161, 131, 114, 125, 136, 135, 126, 113, 135, 149, 166, 120, 15, 16, 11, 13, 13, 13, 9, 9, 13, 14, 11, 11, 11, 12, 12, 12, 12, 12, 12, 15, 11, 14, 17, 24, 29, 24, 28, 35, 36, 75, 81, 48, 56, 43, 47, 37, 49, 44, 29, 23, 19, 29, 27, 24, 8, 11, 13, 8, 13, 10, 9, 9, 13, 10, 13, 10, 13, 10, 14, 15, 19, 21, 20, 20, 16, 23, 20, 21, 15, 15, 16, 16, 19, 28, 25, 23, 19, 14, 15, 12, 12, 12, 12, 11, 9, 9, 8, 9, 8, 7, 8, 8, 8, 8, 7, 8, 9, 9, 13, 11, 195, 198, 196, 199, 206, 192, 207, 171, 109, 84, 76, 53, 9, 5, 16, 22, 13, 10, 6, 7, 6, 1, 3, 9, 9, 6, 62, 59, 56, 37, 20, 1, 6, 8, 8, 17, 9, 7, 1, 4, 9, 13, 15, 12, 13, 10, 18, 8, 21, 56, 59, 48, 41, 44, 59, 69, 71, 52, 50, 52, 96, 100, 99, 97, 84, 60, 75, 90, 90, 50, 13, 10, 12, 46, 61, 73, 101, 118, 140, 160, 175, 145, 132, 148, 156, 156, 166, 184, 202, 204, 189, 186, 174, 154, 151, 153, 167, 167, 158, 138, 144, 152, 147, 150, 168, 198, 182, 175, 121, 131, 137, 128, 141, 152, 144, 142, 159, 182, 190, 183, 134, 122, 138, 149, 153, 163, 176, 176, 175, 173, 162, 124, 108, 62, 88, 95, 107, 113, 129, 155, 169, 175, 162, 135, 83, 93, 94, 100, 93, 101, 157, 158, 137, 107, 125, 140, 147, 129, 126, 126, 148, 152, 157, 30, 13, 13, 13, 13, 13, 11, 12, 12, 12, 11, 11, 11, 12, 12, 12, 12, 12, 12, 15, 11, 16, 8, 15, 30, 25, 25, 31, 35, 55, 50, 38, 41, 43, 43, 37, 44, 37, 31, 27, 28, 26, 26, 13, 10, 2, 13, 13, 10, 12, 9, 7, 5, 9, 9, 13, 10, 16, 18, 21, 24, 21, 17, 16, 14, 23, 17, 14, 12, 14, 11, 13, 20, 22, 21, 17, 16, 18, 12, 13, 10, 15, 13, 11, 9, 8, 7, 9, 8, 7, 8, 8, 8, 8, 7, 8, 9, 9, 13, 10, 8, 193, 194, 197, 197, 203, 201, 195, 196, 172, 115, 89, 85, 66, 26, 4, 12, 17, 14, 8, 4, 9, 13, 10, 11, 13, 4, 18, 17, 9, 2, 8, 8, 8, 8, 8, 8, 9, 9, 9, 11, 11, 35, 77, 57, 16, 40, 70, 52, 48, 67, 58, 65, 38, 35, 33, 36, 53, 65, 66, 76, 75, 90, 99, 96, 80, 58, 65, 92, 112, 50, 20, 17, 34, 48, 77, 112, 134, 147, 167, 148, 135, 129, 137, 134, 147, 150, 161, 162, 164, 178, 168, 164, 181, 186, 174, 164, 162, 152, 152, 162, 173, 179, 185, 183, 174, 157, 137, 133, 145, 135, 110, 119, 136, 156, 174, 189, 198, 187, 117, 115, 121, 125, 120, 142, 167, 177, 174, 175, 187, 163, 120, 82, 104, 126, 136, 137, 152, 177, 190, 193, 168, 125, 115, 111, 109, 111, 114, 125, 160, 159, 157, 113, 86, 95, 100, 102, 107, 122, 142, 157, 164, 48, 9, 14, 12, 13, 10, 9, 12, 13, 13, 13, 13, 13, 13, 12, 12, 12, 12, 12, 12, 12, 12, 11, 9, 7, 29, 36, 30, 27, 33, 31, 51, 78, 71, 49, 36, 28, 25, 32, 24, 28, 32, 25, 19, 8, 13, 10, 11, 12, 13, 14, 14, 14, 13, 13, 13, 14, 16, 17, 16, 13, 12, 11, 13, 17, 12, 11, 13, 12, 16, 14, 14, 15, 14, 12, 12, 13, 10, 13, 10, 9, 12, 11, 13, 10, 9, 9, 9, 8, 8, 8, 8, 8, 8, 8, 8, 8, 8, 15, 8, 13, 196, 201, 199, 196, 202, 201, 198, 198, 202, 176, 119, 93, 90, 62, 23, 3, 17, 25, 16, 5, 3, 11, 13, 10, 11, 8, 4, 13, 10, 13, 10, 13, 10, 8, 8, 8, 8, 8, 8, 9, 9, 9, 5, 12, 77, 52, 8, 30, 77, 47, 37, 49, 74, 44, 40, 41, 39, 46, 50, 61, 51, 50, 58, 60, 89, 98, 108, 32, 2, 18, 32, 20, 20, 20, 28, 22, 53, 45, 64, 92, 162, 168, 137, 140, 140, 105, 106, 143, 161, 160, 168, 177, 182, 187, 189, 192, 189, 170, 168, 176, 178, 178, 182, 184, 186, 201, 191, 174, 155, 139, 127, 119, 115, 129, 149, 167, 183, 191, 196, 177, 115, 134, 137, 136, 126, 145, 172, 177, 180, 181, 193, 181, 122, 114, 133, 152, 157, 156, 170, 193, 203, 196, 167, 124, 131, 131, 125, 125, 124, 134, 159, 172, 171, 154, 104, 102, 94, 85, 93, 105, 139, 164, 162, 61, 11, 12, 14, 12, 13, 10, 12, 13, 13, 13, 13, 13, 13, 12, 12, 12, 12, 12, 12, 12, 12, 11, 9, 11, 14, 33, 50, 28, 35, 62, 48, 98, 84, 53, 41, 32, 28, 31, 30, 29, 29, 23, 5, 9, 11, 13, 10, 11, 12, 14, 14, 14, 14, 14, 14, 14, 17, 18, 14, 11, 13, 10, 9, 13, 10, 13, 10, 13, 10, 13, 10, 13, 10, 14, 19, 16, 14, 13, 13, 10, 9, 11, 13, 10, 9, 8, 12, 11, 13, 10, 9, 9, 9, 8, 8, 8, 8, 8, 8, 8, 8, 8, 8, 15, 11, 12, 193, 196, 194, 194, 198, 194, 195, 206, 203, 205, 182, 134, 99, 83, 64, 29, 11, 16, 25, 13, 4, 7, 12, 9, 13, 10, 13, 10, 11, 9, 7, 8, 8, 8, 8, 8, 8, 9, 9, 9, 9, 9, 70, 4, 9, 84, 42, 37, 38, 42, 48, 37, 39, 40, 43, 44, 45, 53, 57, 70, 74, 73, 87, 76, 44, 16, 2, 3, 12, 18, 15, 20, 29, 33, 29, 29, 20, 19, 25, 34, 80, 69, 107, 62, 20, 14, 37, 103, 155, 183, 181, 174, 166, 189, 199, 195, 185, 181, 184, 188, 196, 196, 192, 186, 204, 202, 191, 172, 131, 90, 98, 122, 131, 149, 164, 186, 197, 192, 183, 149, 142, 136, 140, 146, 153, 174, 185, 182, 187, 201, 186, 124, 140, 160, 178, 184, 181, 191, 206, 212, 200, 163, 135, 147, 149, 143, 139, 136, 143, 156, 184, 191, 176, 123, 117, 100, 91, 92, 99, 117, 149, 157, 40, 16, 18, 16, 15, 14, 13, 13, 13, 13, 13, 13, 13, 12, 12, 12, 12, 12, 12, 12, 12, 11, 8, 9, 11, 13, 10, 38, 26, 34, 52, 54, 106, 113, 76, 37, 38, 32, 31, 32, 31, 30, 22, 9, 12, 13, 13, 10, 11, 11, 14, 14, 14, 15, 15, 15, 14, 16, 15, 12, 11, 9, 9, 13, 10, 9, 11, 11, 11, 14, 20, 16, 13, 11, 14, 13, 13, 10, 12, 11, 13, 10, 12, 11, 13, 10, 9, 9, 9, 8, 8, 8, 8, 8, 8, 8, 8, 8, 8, 11, 14, 12, 196, 195, 195, 191, 197, 196, 205, 203, 205, 207, 202, 196, 141, 98, 82, 68, 33, 6, 18, 20, 20, 7, 8, 11, 7, 8, 13, 10, 9, 9, 8, 8, 8, 8, 8, 8, 9, 9, 9, 5, 6, 57, 47, 53, 75, 44, 37, 47, 49, 48, 28, 35, 35, 39, 52, 62, 71, 83, 85, 78, 57, 27, 13, 10, 13, 19, 13, 10, 11, 12, 13, 15, 14, 18, 19, 17, 19, 13, 17, 17, 23, 18, 16, 20, 21, 32, 15, 12, 20, 48, 71, 90, 125, 156, 198, 195, 194, 172, 183, 191, 189, 187, 182, 180, 179, 187, 182, 168, 139, 114, 82, 88, 124, 127, 146, 169, 188, 193, 178, 162, 141, 131, 141, 152, 153, 161, 190, 200, 192, 200, 216, 194, 143, 164, 185, 202, 211, 212, 218, 226, 225, 212, 164, 154, 165, 166, 163, 158, 151, 155, 159, 183, 205, 191, 136, 125, 110, 102, 100, 109, 113, 127, 138, 22, 16, 20, 17, 18, 17, 14, 13, 13, 13, 13, 13, 13, 12, 12, 12, 12, 12, 12, 12, 12, 11, 12, 8, 6, 17, 19, 29, 33, 70, 101, 129, 116, 78, 38, 39, 32, 29, 34, 21, 14, 13, 10, 14, 12, 16, 9, 13, 10, 11, 14, 14, 14, 15, 15, 15, 14, 12, 11, 11, 12, 13, 10, 13, 10, 13, 13, 12, 11, 13, 12, 17, 14, 12, 13, 11, 13, 10, 11, 13, 10, 9, 8, 12, 11, 13, 10, 9, 9, 9, 8, 8, 8, 8, 8, 8, 8, 8, 8, 8, 7, 16, 11, 193, 193, 193, 196, 195, 196, 201, 202, 205, 208, 205, 212, 205, 137, 101, 87, 73, 36, 13, 10, 15, 24, 17, 9, 8, 7, 8, 13, 10, 9, 7, 9, 9, 9, 7, 7, 7, 8, 8, 8, 7, 4, 12, 69, 73, 35, 33, 45, 80, 63, 51, 36, 39, 56, 70, 80, 82, 72, 63, 48, 38, 9, 3, 6, 9, 11, 15, 15, 15, 15, 20, 15, 11, 9, 13, 10, 13, 10, 11, 9, 9, 12, 11, 12, 18, 19, 20, 15, 15, 15, 16, 15, 16, 28, 124, 183, 191, 185, 155, 157, 157, 138, 85, 70, 113, 137, 146, 138, 131, 115, 119, 79, 81, 118, 141, 158, 169, 164, 138, 146, 171, 143, 142, 149, 163, 165, 182, 215, 233, 217, 221, 234, 181, 180, 186, 204, 216, 220, 217, 228, 239, 227, 218, 170, 169, 189, 188, 182, 178, 166, 165, 167, 190, 212, 199, 144, 134, 125, 114, 105, 107, 121, 139, 139, 55, 19, 21, 20, 21, 16, 16, 15, 13, 13, 13, 13, 13, 13, 13, 13, 13, 13, 13, 13, 13, 12, 13, 10, 8, 9, 22, 30, 32, 33, 57, 79, 155, 93, 52, 40, 33, 26, 31, 21, 7, 8, 11, 12, 14, 16, 13, 10, 11, 12, 11, 13, 17, 15, 13, 12, 13, 10, 13, 10, 13, 10, 13, 10, 13, 10, 13, 10, 13, 10, 9, 11, 13, 13, 10, 12, 15, 13, 18, 13, 10, 11, 13, 10, 9, 9, 13, 10, 13, 10, 13, 10, 11, 13, 10, 9, 8, 8, 8, 8, 8, 8, 6, 7, 9, 13, 10, 13, 10, 13, 10, 13, 10, 11, 13, 9, 191, 195, 199, 196, 199, 197, 199, 203, 204, 204, 209, 206, 212, 195, 143, 105, 91, 76, 44, 13, 17, 24, 21, 13, 10, 3, 5, 9, 8, 8, 9, 9, 9, 7, 7, 7, 8, 8, 8, 7, 5, 2, 17, 41, 28, 33, 49, 55, 50, 55, 57, 61, 65, 65, 69, 66, 29, 6, 6, 14, 12, 7, 8, 7, 5, 17, 15, 16, 17, 21, 14, 6, 6, 8, 9, 8, 5, 1, 7, 8, 8, 14, 13, 13, 15, 15, 15, 16, 15, 17, 19, 89, 172, 173, 139, 105, 64, 25, 13, 10, 7, 15, 25, 56, 109, 124, 124, 129, 125, 92, 96, 137, 145, 120, 111, 108, 117, 190, 202, 158, 149, 155, 166, 173, 188, 230, 242, 234, 230, 231, 175, 182, 187, 212, 218, 217, 216, 227, 235, 225, 210, 171, 182, 214, 211, 208, 201, 183, 179, 181, 195, 213, 202, 137, 142, 139, 133, 119, 108, 111, 141, 156, 146, 51, 20, 17, 18, 18, 15, 15, 13, 13, 13, 13, 13, 13, 13, 13, 13, 13, 13, 13, 13, 12, 9, 9, 8, 16, 34, 38, 43, 52, 69, 79, 75, 47, 33, 26, 16, 13, 6, 12, 9, 9, 12, 13, 14, 13, 10, 11, 12, 11, 13, 17, 14, 13, 11, 13, 10, 13, 10, 13, 10, 13, 10, 13, 10, 13, 10, 13, 10, 11, 12, 14, 13, 13, 15, 11, 19, 11, 13, 10, 13, 10, 9, 9, 13, 10, 13, 10, 13, 10, 13, 10, 9, 9, 8, 8, 8, 8, 8, 8, 7, 7, 13, 10, 13, 10, 13, 10, 13, 10, 13, 10, 12, 13, 10, 13, 10, 193, 194, 194, 194, 197, 194, 197, 202, 202, 201, 203, 210, 205, 205, 204, 150, 111, 91, 79, 45, 15, 12, 22, 19, 13, 10, 3, 13, 10, 8, 13, 10, 9, 9, 9, 8, 8, 8, 8, 8, 8, 13, 10, 8, 9, 6, 14, 29, 33, 50, 61, 69, 57, 57, 47, 39, 22, 11, 8, 7, 5, 6, 13, 13, 14, 11, 11, 13, 10, 17, 16, 16, 22, 16, 14, 13, 10, 11, 14, 14, 12, 6, 2, 13, 10, 11, 12, 14, 12, 11, 15, 15, 15, 16, 16, 17, 21, 68, 164, 133, 17, 11, 13, 5, 20, 41, 95, 123, 135, 128, 136, 141, 155, 153, 125, 106, 112, 87, 105, 138, 168, 184, 209, 213, 165, 164, 163, 168, 172, 181, 231, 243, 233, 219, 221, 173, 173, 184, 219, 220, 203, 206, 220, 224, 218, 204, 173, 169, 205, 214, 224, 213, 202, 198, 198, 205, 214, 196, 133, 151, 156, 152, 136, 123, 117, 133, 156, 167, 124, 19, 27, 42, 23, 15, 15, 13, 13, 13, 13, 13, 13, 13, 13, 13, 13, 13, 13, 13, 12, 8, 9, 6, 12, 36, 43, 45, 36, 59, 60, 57, 42, 25, 27, 17, 11, 8, 13, 10, 6, 13, 10, 13, 10, 13, 10, 12, 11, 11, 11, 11, 13, 17, 14, 12, 13, 10, 13, 10, 13, 10, 13, 10, 13, 10, 13, 10, 13, 10, 13, 10, 11, 12, 13, 14, 12, 13, 13, 11, 11, 13, 10, 9, 8, 8, 9, 9, 9, 9, 9, 8, 8, 8, 8, 8, 8, 8, 7, 8, 13, 10, 11, 11, 11, 11, 12, 9, 11, 194, 194, 192, 195, 193, 191, 193, 194, 196, 198, 201, 203, 205, 207, 208, 208, 165, 114, 91, 82, 53, 16, 6, 15, 20, 15, 15, 9, 13, 10, 9, 9, 9, 9, 9, 9, 8, 8, 8, 6, 7, 13, 10, 9, 4, 13, 10, 12, 13, 10, 12, 8, 13, 13, 9, 13, 10, 12, 17, 24, 21, 12, 8, 9, 12, 13, 16, 20, 20, 17, 19, 19, 22, 14, 16, 15, 19, 22, 23, 19, 12, 7, 17, 18, 19, 17, 16, 12, 14, 14, 14, 16, 16, 17, 20, 26, 63, 15, 12, 36, 57, 72, 100, 127, 146, 145, 159, 173, 172, 169, 166, 151, 129, 97, 106, 143, 158, 167, 177, 188, 224, 219, 173, 169, 169, 181, 165, 173, 203, 217, 210, 209, 212, 170, 169, 179, 198, 209, 191, 193, 208, 210, 211, 196, 168, 178, 217, 223, 226, 210, 215, 209, 209, 215, 215, 183, 136, 158, 169, 163, 145, 135, 128, 133, 149, 182, 175, 132, 158, 165, 83, 15, 15, 13, 13, 13, 13, 13, 13, 13, 13, 13, 13, 13, 13, 13, 12, 9, 9, 7, 13, 42, 46, 39, 39, 68, 85, 54, 40, 24, 31, 19, 11, 13, 10, 6, 11, 8, 8, 8, 8, 12, 11, 13, 10, 11, 13, 17, 13, 12, 13, 10, 13, 10, 13, 10, 13, 10, 13, 10, 13, 10, 13, 10, 13, 10, 13, 10, 13, 10, 13, 10, 9, 9, 9, 9, 7, 9, 9, 9, 8, 7, 8, 8, 8, 9, 8, 7, 8, 8, 8, 8, 8, 8, 8, 9, 11, 12, 12, 12, 12, 13, 10, 11, 13, 190, 197, 195, 196, 196, 198, 195, 195, 196, 198, 202, 202, 208, 214, 213, 212, 211, 162, 108, 99, 89, 59, 20, 11, 24, 22, 13, 3, 2, 6, 7, 13, 10, 6, 7, 8, 8, 13, 10, 12, 9, 8, 8, 9, 13, 10, 13, 14, 13, 10, 11, 11, 9, 9, 9, 12, 13, 15, 17, 18, 19, 18, 17, 17, 18, 13, 11, 20, 16, 12, 16, 16, 16, 15, 16, 16, 15, 14, 13, 14, 20, 9, 16, 14, 13, 16, 13, 27, 21, 27, 22, 28, 28, 25, 18, 5, 39, 67, 89, 108, 110, 126, 136, 147, 150, 148, 139, 139, 143, 140, 111, 92, 107, 141, 156, 169, 175, 192, 212, 226, 217, 169, 164, 181, 180, 160, 174, 196, 210, 212, 203, 189, 152, 163, 175, 189, 193, 184, 181, 195, 207, 192, 146, 169, 201, 217, 207, 196, 197, 202, 207, 218, 211, 193, 151, 140, 156, 164, 161, 150, 145, 149, 160, 172, 186, 197, 209, 213, 207, 113, 22, 23, 20, 18, 14, 13, 12, 11, 13, 10, 13, 15, 15, 17, 13, 13, 13, 13, 12, 12, 15, 60, 27, 71, 48, 9, 53, 41, 29, 15, 32, 27, 11, 12, 11, 13, 10, 9, 9, 9, 9, 15, 15, 15, 15, 15, 15, 12, 12, 12, 11, 11, 11, 13, 10, 9, 9, 9, 7, 7, 7, 7, 7, 7, 7, 7, 7, 8, 9, 9, 9, 9, 9, 9, 9, 9, 9, 8, 8, 8, 6, 4, 4, 7, 13, 10, 11, 11, 13, 11, 8, 7, 13, 10, 11, 193, 196, 194, 194, 194, 194, 194, 195, 197, 198, 202, 203, 207, 214, 213, 211, 204, 212, 164, 111, 98, 82, 58, 22, 8, 21, 22, 14, 2, 5, 7, 6, 9, 13, 10, 13, 10, 13, 10, 13, 10, 13, 10, 8, 8, 8, 8, 7, 9, 13, 10, 9, 9, 9, 9, 9, 9, 13, 10, 11, 12, 12, 14, 17, 17, 13, 15, 17, 16, 20, 33, 26, 21, 20, 16, 21, 20, 17, 16, 13, 13, 15, 16, 21, 16, 19, 18, 16, 14, 17, 16, 21, 19, 11, 6, 13, 10, 21, 29, 67, 98, 108, 115, 108, 108, 121, 138, 147, 148, 146, 138, 139, 129, 128, 125, 98, 111, 141, 158, 169, 176, 189, 212, 223, 212, 171, 173, 189, 191, 176, 177, 192, 201, 200, 199, 172, 153, 166, 172, 188, 182, 182, 175, 177, 192, 161, 128, 160, 189, 197, 188, 183, 180, 185, 199, 216, 212, 188, 153, 148, 164, 173, 172, 162, 152, 145, 166, 170, 185, 197, 218, 210, 195, 168, 19, 19, 16, 13, 11, 9, 9, 12, 11, 14, 15, 15, 17, 13, 13, 13, 13, 12, 12, 19, 51, 22, 37, 29, 13, 23, 16, 15, 19, 25, 23, 11, 13, 13, 11, 11, 12, 12, 12, 14, 14, 14, 15, 15, 15, 12, 12, 12, 11, 11, 11, 13, 10, 9, 9, 9, 7, 7, 7, 7, 7, 7, 7, 7, 7, 8, 9, 9, 9, 9, 9, 9, 9, 9, 9, 8, 8, 8, 6, 5, 5, 8, 13, 10, 12, 13, 14, 9, 5, 7, 12, 13, 10, 194, 194, 192, 190, 190, 189, 192, 194, 198, 200, 202, 204, 205, 211, 212, 211, 206, 199, 206, 169, 120, 93, 76, 59, 24, 6, 18, 23, 14, 8, 1, 3, 14, 14, 14, 11, 11, 11, 9, 8, 8, 8, 8, 8, 9, 8, 8, 8, 9, 9, 9, 9, 9, 13, 10, 11, 11, 12, 12, 14, 18, 20, 19, 15, 20, 20, 19, 20, 26, 32, 26, 17, 15, 15, 15, 17, 21, 24, 28, 25, 23, 18, 17, 17, 12, 8, 7, 22, 51, 73, 81, 79, 93, 103, 109, 103, 90, 113, 119, 135, 140, 142, 141, 132, 134, 132, 139, 137, 102, 123, 134, 156, 173, 177, 184, 205, 217, 205, 172, 181, 198, 205, 202, 182, 189, 194, 183, 183, 145, 158, 171, 171, 179, 178, 177, 164, 160, 161, 125, 127, 150, 173, 188, 179, 178, 173, 170, 181, 209, 205, 177, 156, 158, 175, 183, 183, 173, 157, 141, 167, 167, 183, 192, 203, 213, 194, 154, 23, 13, 11, 13, 10, 8, 5, 5, 11, 11, 14, 13, 15, 15, 13, 13, 13, 13, 12, 12, 14, 11, 14, 18, 8, 15, 9, 11, 9, 13, 10, 17, 16, 12, 13, 13, 11, 11, 13, 13, 13, 13, 13, 13, 14, 14, 14, 11, 11, 11, 11, 11, 11, 13, 10, 9, 9, 9, 7, 7, 7, 7, 7, 7, 7, 7, 7, 8, 9, 9, 9, 9, 9, 9, 9, 9, 9, 8, 8, 8, 6, 5, 7, 13, 10, 11, 12, 16, 15, 8, 5, 8, 13, 9, 190, 194, 190, 189, 189, 191, 192, 194, 198, 201, 201, 204, 203, 208, 209, 210, 208, 216, 208, 215, 178, 128, 89, 84, 63, 27, 13, 10, 22, 28, 17, 5, 1, 17, 17, 16, 12, 11, 13, 10, 8, 8, 8, 8, 9, 9, 9, 9, 9, 9, 9, 9, 9, 9, 13, 10, 11, 11, 13, 10, 13, 10, 7, 5, 7, 8, 11, 9, 12, 14, 19, 23, 26, 28, 25, 18, 16, 17, 19, 21, 26, 28, 28, 25, 20, 12, 4, 7, 13, 41, 68, 83, 89, 87, 89, 79, 85, 105, 106, 102, 90, 111, 118, 126, 131, 134, 134, 127, 115, 123, 136, 131, 109, 131, 132, 153, 176, 175, 179, 192, 201, 190, 162, 178, 197, 202, 206, 186, 189, 190, 177, 166, 133, 165, 175, 172, 169, 174, 170, 160, 158, 133, 124, 136, 150, 169, 184, 176, 169, 161, 156, 163, 186, 176, 151, 154, 158, 172, 176, 178, 170, 152, 155, 170, 176, 175, 184, 192, 189, 171, 160, 32, 13, 11, 13, 10, 8, 8, 7, 11, 11, 13, 13, 14, 15, 13, 13, 13, 13, 12, 12, 14, 13, 12, 12, 9, 12, 13, 10, 9, 11, 12, 14, 12, 12, 11, 13, 10, 9, 13, 10, 11, 11, 11, 11, 11, 11, 11, 11, 11, 13, 10, 13, 10, 13, 10, 11, 11, 11, 13, 10, 9, 9, 9, 7, 7, 7, 7, 7, 7, 7, 7, 7, 8, 9, 9, 9, 9, 9, 9, 9, 9, 9, 8, 8, 8, 5, 5, 8, 12, 11, 14, 18, 14, 8, 8, 11, 14, 9, 186, 191, 191, 188, 189, 191, 191, 193, 197, 203, 200, 203, 203, 205, 207, 207, 204, 209, 212, 209, 215, 187, 125, 90, 83, 68, 29, 13, 18, 26, 20, 2, 16, 15, 14, 12, 11, 13, 10, 8, 8, 8, 8, 8, 8, 8, 9, 9, 9, 9, 9, 9, 9, 13, 10, 11, 13, 10, 13, 10, 11, 13, 10, 8, 9, 9, 9, 7, 7, 7, 13, 10, 14, 19, 21, 23, 20, 18, 20, 21, 21, 22, 23, 18, 15, 7, 4, 15, 48, 63, 84, 87, 95, 109, 108, 94, 81, 84, 110, 118, 111, 88, 106, 114, 120, 124, 127, 130, 125, 110, 128, 137, 124, 115, 129, 136, 152, 174, 174, 176, 184, 177, 167, 139, 166, 188, 191, 196, 190, 190, 193, 181, 167, 142, 169, 175, 176, 169, 171, 170, 173, 165, 125, 136, 144, 160, 171, 181, 174, 164, 155, 143, 131, 138, 133, 135, 146, 149, 158, 160, 156, 154, 142, 172, 184, 193, 184, 179, 173, 146, 154, 116, 21, 16, 15, 15, 15, 14, 13, 11, 12, 13, 12, 13, 14, 13, 13, 13, 13, 12, 12, 12, 11, 9, 13, 13, 11, 13, 10, 13, 10, 12, 12, 13, 12, 12, 13, 10, 9, 8, 8, 9, 9, 9, 11, 11, 11, 13, 10, 13, 10, 13, 10, 9, 9, 9, 13, 10, 13, 10, 13, 10, 9, 8, 8, 8, 7, 7, 7, 7, 7, 7, 7, 7, 7, 8, 9, 9, 9, 9, 9, 9, 9, 9, 8, 8, 8, 8, 6, 6, 13, 10, 13, 12, 14, 18, 11, 9, 9, 13, 13, 7, 186, 188, 191, 188, 189, 190, 192, 194, 196, 203, 201, 203, 205, 203, 205, 203, 208, 209, 214, 220, 213, 214, 187, 126, 95, 89, 73, 40, 11, 19, 25, 21, 20, 13, 10, 9, 12, 12, 9, 9, 9, 8, 7, 8, 8, 8, 8, 8, 8, 9, 9, 9, 9, 9, 9, 13, 10, 11, 11, 13, 10, 9, 9, 9, 9, 9, 9, 8, 8, 11, 13, 15, 17, 18, 17, 20, 23, 23, 13, 17, 8, 15, 25, 42, 72, 86, 86, 96, 104, 118, 136, 143, 133, 96, 84, 114, 130, 118, 98, 109, 109, 111, 115, 118, 122, 120, 119, 130, 130, 119, 109, 124, 138, 165, 172, 173, 173, 181, 159, 133, 103, 149, 175, 187, 193, 192, 192, 195, 189, 187, 171, 170, 177, 180, 172, 176, 179, 191, 179, 129, 138, 156, 169, 175, 178, 172, 165, 156, 133, 112, 122, 105, 120, 138, 145, 147, 146, 132, 134, 151, 194, 193, 201, 186, 172, 145, 125, 98, 23, 17, 14, 15, 16, 16, 16, 17, 13, 8, 8, 13, 13, 15, 13, 13, 13, 13, 13, 13, 13, 12, 12, 12, 12, 12, 12, 12, 12, 12, 12, 12, 12, 13, 10, 9, 9, 9, 9, 9, 9, 11, 11, 11, 11, 11, 11, 9, 9, 9, 9, 9, 9, 8, 7, 7, 7, 7, 7, 7, 7, 7, 7, 7, 7, 7, 8, 9, 9, 9, 9, 9, 9, 9, 8, 7, 8, 8, 8, 6, 6, 12, 14, 15, 16, 17, 9, 13, 10, 9, 14, 11, 6, 190, 190, 189, 189, 187, 188, 193, 197, 197, 202, 203, 204, 207, 201, 202, 204, 206, 211, 217, 214, 216, 211, 215, 188, 138, 102, 91, 80, 41, 14, 17, 27, 29, 14, 3, 7, 8, 11, 13, 10, 9, 8, 8, 8, 8, 8, 8, 8, 8, 8, 8, 8, 9, 9, 9, 13, 10, 11, 11, 11, 11, 11, 11, 11, 11, 11, 8, 8, 13, 10, 8, 9, 13, 10, 12, 13, 8, 5, 4, 13, 10, 26, 22, 37, 61, 75, 83, 93, 98, 109, 115, 129, 137, 148, 150, 110, 88, 107, 124, 125, 115, 113, 103, 101, 95, 100, 108, 117, 121, 124, 124, 107, 93, 119, 143, 184, 180, 171, 168, 178, 149, 117, 95, 138, 169, 184, 190, 194, 194, 197, 199, 208, 204, 175, 177, 180, 175, 185, 193, 204, 193, 132, 139, 164, 172, 171, 180, 175, 168, 162, 134, 123, 135, 124, 124, 136, 147, 151, 163, 150, 155, 169, 191, 189, 186, 171, 151, 106, 69, 13, 10, 16, 9, 13, 10, 7, 9, 14, 11, 8, 8, 9, 9, 13, 10, 13, 14, 14, 14, 14, 13, 13, 13, 13, 12, 12, 12, 12, 12, 12, 12, 12, 12, 12, 12, 12, 13, 10, 9, 9, 9, 9, 9, 9, 11, 11, 11, 11, 11, 11, 9, 9, 9, 9, 9, 9, 8, 7, 7, 7, 7, 7, 7, 7, 7, 7, 7, 7, 7, 8, 9, 9, 9, 9, 9, 9, 9, 8, 7, 8, 8, 8, 6, 8, 14, 16, 16, 21, 18, 13, 10, 13, 10, 11, 13, 8, 7, 190, 189, 188, 187, 186, 185, 192, 199, 200, 204, 202, 203, 206, 200, 201, 206, 205, 209, 215, 216, 214, 218, 208, 217, 197, 141, 101, 94, 84, 45, 5, 16, 20, 21, 8, 4, 7, 11, 12, 13, 10, 9, 9, 8, 8, 8, 8, 8, 8, 7, 7, 7, 9, 9, 9, 13, 10, 11, 11, 11, 11, 11, 11, 11, 11, 11, 8, 13, 10, 9, 8, 8, 8, 13, 14, 6, 9, 22, 34, 42, 30, 35, 55, 68, 80, 83, 92, 96, 100, 113, 112, 114, 120, 122, 83, 82, 102, 114, 112, 111, 102, 91, 81, 88, 100, 114, 116, 113, 115, 91, 74, 96, 149, 187, 194, 177, 172, 178, 159, 116, 109, 142, 175, 190, 192, 194, 196, 200, 206, 219, 223, 182, 171, 175, 180, 191, 200, 211, 195, 132, 129, 158, 163, 158, 178, 179, 175, 167, 146, 141, 144, 152, 141, 138, 143, 151, 165, 156, 148, 148, 131, 115, 117, 121, 108, 77, 41, 31, 27, 14, 14, 20, 24, 28, 21, 4, 14, 14, 12, 13, 12, 12, 15, 15, 15, 13, 13, 13, 13, 12, 12, 12, 12, 12, 12, 12, 12, 12, 12, 12, 12, 13, 10, 9, 9, 9, 9, 9, 9, 11, 11, 11, 11, 11, 11, 9, 9, 9, 9, 9, 9, 8, 7, 7, 7, 7, 7, 7, 7, 7, 7, 7, 7, 7, 8, 9, 9, 9, 9, 9, 9, 9, 8, 7, 8, 8, 8, 5, 13, 10, 16, 18, 16, 22, 13, 12, 13, 10, 13, 12, 8, 7, 188, 190, 189, 189, 188, 188, 191, 199, 202, 205, 200, 201, 205, 200, 200, 207, 204, 206, 211, 211, 210, 209, 217, 207, 219, 207, 161, 116, 92, 79, 44, 9, 3, 19, 22, 13, 13, 10, 11, 12, 11, 9, 9, 8, 8, 8, 8, 8, 8, 7, 7, 7, 9, 9, 9, 13, 10, 11, 11, 11, 11, 11, 11, 11, 11, 11, 13, 10, 12, 9, 9, 8, 8, 20, 18, 21, 47, 45, 38, 41, 39, 45, 60, 77, 95, 106, 109, 108, 113, 124, 116, 108, 110, 122, 67, 63, 84, 99, 100, 108, 103, 88, 84, 88, 96, 108, 119, 113, 112, 108, 87, 85, 147, 183, 198, 187, 183, 183, 160, 150, 121, 145, 183, 197, 194, 195, 197, 201, 210, 224, 229, 183, 173, 170, 182, 192, 201, 213, 191, 132, 116, 142, 152, 149, 176, 179, 180, 174, 149, 140, 142, 141, 136, 146, 155, 165, 163, 173, 170, 138, 141, 137, 126, 138, 131, 122, 113, 118, 119, 96, 91, 89, 89, 98, 98, 77, 60, 32, 24, 20, 17, 15, 15, 15, 15, 13, 13, 13, 13, 12, 12, 12, 12, 12, 12, 12, 12, 12, 12, 12, 12, 13, 10, 9, 9, 9, 9, 9, 9, 11, 11, 11, 11, 11, 11, 9, 9, 9, 9, 9, 9, 8, 7, 7, 7, 7, 7, 7, 7, 7, 7, 7, 7, 7, 8, 9, 9, 9, 9, 9, 9, 9, 8, 7, 8, 8, 8, 5, 11, 18, 20, 16, 21, 9, 13, 13, 10, 15, 11, 13, 10, 5, 183, 186, 187, 189, 192, 195, 196, 198, 202, 202, 203, 205, 201, 205, 206, 204, 207, 207, 210, 208, 213, 211, 215, 218, 218, 222, 212, 159, 111, 94, 80, 56, 22, 13, 23, 21, 13, 10, 4, 13, 10, 16, 17, 14, 12, 5, 8, 8, 8, 8, 8, 8, 8, 8, 8, 8, 8, 13, 10, 13, 10, 11, 11, 11, 11, 11, 11, 11, 11, 11, 12, 12, 12, 14, 13, 4, 30, 34, 45, 45, 46, 54, 69, 79, 92, 105, 100, 105, 106, 121, 117, 117, 119, 137, 107, 91, 82, 83, 84, 106, 106, 101, 92, 88, 89, 86, 96, 123, 139, 149, 127, 85, 137, 175, 191, 197, 197, 199, 185, 171, 141, 138, 176, 200, 209, 191, 188, 200, 213, 217, 207, 174, 155, 153, 155, 166, 164, 189, 186, 159, 119, 134, 149, 168, 177, 170, 165, 159, 148, 145, 135, 127, 141, 157, 173, 190, 192, 184, 183, 121, 132, 151, 168, 161, 151, 138, 122, 118, 118, 114, 116, 125, 102, 100, 109, 120, 109, 91, 81, 77, 58, 43, 21, 13, 9, 13, 12, 13, 10, 7, 8, 12, 17, 20, 14, 12, 12, 12, 12, 12, 12, 12, 11, 11, 11, 11, 11, 11, 11, 11, 11, 11, 11, 11, 11, 7, 7, 7, 7, 7, 7, 7, 9, 9, 9, 9, 9, 9, 7, 7, 7, 7, 7, 7, 8, 9, 9, 9, 9, 9, 9, 8, 8, 8, 7, 8, 9, 8, 14, 17, 21, 19, 14, 12, 12, 13, 15, 9, 8, 9, 187, 189, 187, 188, 195, 195, 196, 198, 202, 203, 202, 202, 204, 204, 206, 210, 210, 205, 208, 208, 212, 210, 217, 213, 220, 221, 223, 217, 163, 117, 91, 80, 63, 22, 13, 19, 27, 16, 9, 13, 10, 11, 13, 13, 8, 5, 9, 9, 9, 8, 8, 8, 8, 8, 8, 8, 8, 13, 10, 13, 10, 11, 11, 11, 11, 11, 11, 11, 11, 11, 12, 12, 12, 13, 17, 30, 30, 28, 36, 42, 36, 43, 48, 58, 68, 76, 71, 85, 101, 118, 110, 99, 82, 113, 112, 98, 99, 106, 118, 114, 100, 108, 71, 49, 68, 87, 91, 104, 126, 133, 124, 94, 117, 143, 170, 178, 177, 180, 176, 166, 139, 127, 167, 189, 197, 182, 173, 185, 200, 201, 192, 160, 130, 153, 154, 156, 155, 173, 169, 146, 116, 123, 142, 161, 173, 167, 150, 151, 154, 159, 152, 158, 163, 177, 192, 207, 210, 203, 194, 129, 130, 155, 175, 172, 163, 150, 143, 139, 142, 143, 142, 160, 145, 118, 126, 139, 136, 135, 140, 144, 135, 126, 97, 83, 62, 44, 37, 24, 16, 1, 7, 17, 13, 12, 12, 12, 12, 12, 12, 12, 12, 11, 11, 11, 11, 11, 11, 11, 11, 11, 11, 11, 11, 11, 7, 7, 7, 7, 7, 7, 7, 9, 9, 9, 9, 9, 9, 7, 7, 7, 7, 7, 7, 8, 9, 9, 9, 9, 9, 9, 8, 8, 8, 7, 8, 9, 8, 19, 16, 26, 18, 11, 13, 13, 10, 16, 11, 9, 8, 13, 10, 187, 189, 188, 189, 195, 194, 196, 198, 202, 203, 202, 201, 205, 206, 209, 205, 210, 205, 208, 210, 211, 210, 217, 214, 220, 222, 217, 217, 214, 168, 111, 95, 91, 67, 24, 12, 21, 26, 17, 6, 3, 11, 13, 12, 11, 9, 9, 9, 8, 8, 8, 8, 8, 8, 8, 8, 13, 10, 13, 10, 11, 11, 11, 11, 11, 11, 11, 11, 11, 12, 12, 12, 13, 10, 17, 42, 26, 28, 29, 34, 33, 39, 38, 37, 41, 45, 58, 70, 83, 107, 116, 115, 112, 96, 110, 90, 123, 127, 123, 99, 46, 36, 31, 18, 31, 79, 94, 96, 97, 99, 103, 106, 101, 124, 136, 153, 153, 154, 157, 151, 131, 114, 148, 169, 180, 170, 159, 155, 175, 177, 171, 141, 116, 143, 149, 157, 157, 157, 149, 134, 120, 120, 141, 159, 180, 177, 157, 162, 170, 172, 175, 171, 171, 186, 200, 213, 217, 212, 198, 129, 120, 148, 169, 172, 165, 154, 147, 147, 158, 165, 176, 183, 181, 144, 135, 149, 145, 148, 156, 160, 163, 165, 144, 115, 109, 100, 101, 99, 91, 48, 22, 11, 15, 17, 14, 12, 12, 12, 12, 12, 12, 11, 11, 11, 11, 11, 11, 11, 11, 11, 11, 11, 11, 11, 7, 7, 7, 7, 7, 7, 7, 9, 9, 9, 9, 9, 9, 7, 7, 7, 7, 7, 7, 8, 9, 9, 9, 9, 9, 9, 8, 8, 8, 7, 8, 9, 11, 18, 17, 26, 17, 13, 10, 13, 11, 16, 9, 8, 8, 11, 185, 188, 189, 192, 193, 193, 196, 198, 202, 203, 203, 203, 203, 204, 205, 205, 206, 207, 210, 210, 210, 210, 215, 219, 217, 220, 226, 213, 217, 217, 174, 118, 104, 94, 62, 26, 9, 24, 21, 15, 7, 6, 12, 15, 17, 13, 10, 13, 10, 13, 10, 8, 8, 8, 8, 8, 8, 8, 8, 13, 10, 13, 10, 11, 11, 11, 11, 11, 11, 11, 11, 11, 12, 12, 12, 4, 12, 45, 31, 37, 39, 43, 44, 44, 41, 43, 44, 44, 49, 54, 58, 76, 78, 98, 110, 118, 131, 36, 25, 58, 97, 110, 66, 23, 28, 26, 17, 19, 24, 58, 80, 86, 95, 92, 90, 119, 115, 131, 142, 144, 137, 135, 124, 112, 138, 150, 163, 157, 144, 145, 154, 150, 141, 121, 117, 130, 148, 159, 155, 151, 141, 131, 136, 140, 162, 177, 200, 193, 171, 172, 179, 182, 177, 171, 175, 183, 194, 207, 212, 208, 191, 124, 101, 130, 149, 161, 155, 146, 140, 140, 153, 175, 191, 205, 196, 164, 151, 154, 152, 153, 159, 169, 170, 172, 174, 134, 125, 112, 120, 128, 127, 107, 92, 75, 44, 19, 15, 12, 12, 12, 12, 12, 12, 11, 11, 11, 11, 11, 11, 11, 11, 11, 11, 11, 11, 11, 7, 7, 7, 7, 7, 7, 7, 9, 9, 9, 9, 9, 9, 7, 7, 7, 7, 7, 7, 8, 9, 9, 9, 9, 9, 9, 8, 8, 8, 7, 8, 9, 17, 12, 19, 23, 16, 11, 12, 14, 14, 13, 10, 7, 9, 11, 189, 188, 192, 193, 194, 196, 196, 197, 200, 201, 203, 201, 208, 206, 207, 208, 206, 210, 207, 210, 208, 210, 214, 216, 217, 217, 218, 219, 220, 221, 223, 178, 130, 105, 90, 63, 29, 13, 10, 11, 22, 16, 11, 9, 14, 15, 13, 10, 11, 8, 13, 10, 13, 10, 13, 10, 8, 8, 8, 8, 8, 8, 8, 9, 9, 9, 11, 11, 11, 11, 11, 11, 12, 12, 12, 5, 7, 54, 39, 54, 65, 64, 50, 40, 35, 39, 44, 42, 45, 58, 88, 99, 100, 118, 127, 134, 70, 5, 11, 17, 17, 17, 18, 19, 22, 16, 14, 26, 21, 84, 79, 69, 77, 46, 17, 44, 64, 88, 142, 148, 138, 128, 125, 121, 137, 143, 156, 150, 134, 134, 139, 130, 137, 123, 114, 126, 155, 148, 141, 136, 147, 134, 145, 159, 179, 189, 214, 204, 174, 173, 179, 184, 169, 164, 165, 171, 184, 195, 196, 200, 194, 115, 96, 123, 133, 139, 135, 129, 124, 126, 139, 172, 202, 216, 205, 177, 162, 161, 160, 161, 163, 167, 175, 181, 189, 164, 124, 126, 131, 143, 147, 130, 117, 127, 132, 76, 20, 18, 11, 11, 13, 12, 11, 11, 11, 11, 11, 11, 11, 11, 9, 9, 9, 9, 9, 9, 7, 7, 7, 7, 7, 7, 7, 9, 9, 9, 9, 9, 9, 7, 7, 7, 7, 7, 7, 8, 9, 9, 9, 8, 8, 8, 7, 7, 7, 7, 8, 9, 15, 13, 20, 23, 13, 14, 13, 15, 11, 4, 9, 13, 10, 11, 189, 194, 193, 195, 196, 198, 199, 200, 202, 202, 202, 203, 205, 206, 204, 206, 207, 209, 208, 210, 209, 211, 213, 214, 215, 215, 214, 217, 218, 223, 220, 219, 189, 134, 104, 88, 70, 33, 6, 14, 24, 19, 12, 7, 12, 12, 14, 13, 13, 10, 13, 10, 13, 10, 8, 8, 8, 8, 8, 8, 8, 9, 9, 9, 11, 11, 11, 11, 11, 11, 12, 12, 12, 12, 5, 24, 23, 46, 66, 59, 61, 56, 42, 65, 73, 78, 77, 102, 125, 126, 107, 120, 99, 49, 16, 20, 14, 12, 13, 10, 15, 19, 18, 18, 13, 13, 10, 24, 25, 47, 27, 17, 15, 24, 25, 12, 14, 11, 53, 102, 128, 138, 121, 91, 105, 125, 147, 141, 129, 144, 145, 148, 132, 135, 134, 135, 134, 140, 129, 129, 143, 142, 160, 173, 193, 204, 219, 203, 164, 161, 173, 172, 150, 137, 140, 155, 174, 192, 199, 205, 195, 144, 114, 131, 139, 138, 133, 129, 126, 129, 139, 177, 208, 221, 212, 182, 163, 160, 160, 166, 172, 175, 185, 190, 203, 190, 156, 139, 139, 145, 147, 137, 129, 129, 139, 149, 71, 14, 17, 11, 13, 12, 11, 11, 11, 11, 11, 11, 11, 11, 9, 9, 9, 9, 9, 9, 7, 7, 7, 7, 7, 7, 7, 9, 9, 9, 9, 9, 9, 7, 7, 7, 7, 7, 7, 8, 9, 9, 9, 8, 8, 8, 7, 7, 7, 8, 9, 11, 13, 14, 23, 21, 15, 16, 14, 15, 9, 7, 9, 13, 10, 11, 192, 192, 195, 196, 198, 200, 201, 202, 203, 202, 201, 205, 203, 206, 202, 205, 208, 207, 209, 210, 211, 212, 213, 213, 214, 214, 213, 215, 218, 224, 222, 222, 227, 201, 138, 110, 98, 77, 38, 13, 10, 13, 10, 20, 20, 11, 1, 13, 10, 13, 10, 13, 10, 11, 11, 11, 9, 9, 9, 8, 8, 8, 8, 9, 9, 9, 11, 11, 11, 11, 11, 11, 12, 12, 12, 5, 13, 10, 14, 7, 18, 56, 54, 46, 65, 57, 63, 87, 89, 85, 85, 63, 36, 20, 17, 3, 8, 22, 13, 16, 13, 12, 17, 12, 17, 20, 16, 13, 18, 15, 15, 13, 19, 18, 19, 32, 21, 16, 12, 13, 13, 58, 45, 17, 80, 89, 121, 118, 128, 138, 148, 160, 171, 147, 149, 157, 155, 154, 112, 117, 134, 144, 143, 165, 189, 206, 215, 212, 189, 140, 146, 146, 160, 157, 156, 161, 173, 192, 209, 212, 220, 207, 184, 147, 151, 160, 152, 149, 148, 148, 151, 161, 188, 213, 227, 217, 186, 165, 161, 159, 163, 167, 180, 190, 197, 208, 204, 184, 157, 149, 140, 137, 138, 134, 127, 140, 148, 146, 28, 17, 14, 13, 12, 11, 11, 11, 11, 11, 11, 11, 11, 9, 9, 9, 9, 9, 9, 7, 7, 7, 7, 7, 7, 7, 9, 9, 9, 9, 9, 9, 7, 7, 7, 7, 7, 7, 8, 9, 9, 9, 8, 8, 8, 7, 7, 7, 8, 8, 13, 11, 16, 27, 18, 17, 16, 16, 15, 8, 9, 9, 13, 10, 11, 191, 192, 194, 195, 197, 199, 201, 202, 201, 201, 200, 204, 204, 206, 206, 207, 208, 206, 211, 209, 212, 213, 213, 215, 216, 216, 214, 216, 220, 220, 230, 231, 217, 225, 202, 143, 107, 91, 78, 47, 12, 8, 15, 19, 9, 16, 12, 12, 12, 12, 12, 13, 10, 13, 10, 13, 10, 8, 8, 8, 8, 9, 9, 9, 11, 11, 11, 11, 11, 11, 12, 12, 12, 12, 8, 13, 20, 15, 21, 17, 19, 23, 16, 6, 18, 21, 15, 13, 16, 18, 13, 12, 12, 7, 12, 23, 20, 18, 21, 23, 23, 26, 28, 22, 17, 14, 11, 18, 24, 23, 20, 14, 28, 22, 15, 14, 13, 26, 7, 17, 24, 15, 14, 64, 84, 46, 106, 146, 159, 167, 159, 164, 167, 165, 154, 109, 118, 130, 140, 156, 180, 194, 206, 212, 210, 154, 120, 135, 159, 172, 174, 168, 171, 187, 205, 220, 223, 230, 221, 210, 175, 173, 183, 169, 165, 164, 164, 172, 182, 199, 220, 231, 223, 188, 166, 160, 168, 170, 173, 183, 193, 201, 206, 205, 198, 176, 160, 143, 137, 142, 138, 135, 133, 150, 154, 79, 18, 17, 13, 12, 11, 11, 11, 11, 11, 11, 11, 11, 9, 9, 9, 9, 9, 9, 7, 7, 7, 7, 7, 7, 7, 9, 9, 9, 9, 9, 9, 7, 7, 7, 7, 7, 7, 8, 9, 9, 9, 8, 8, 8, 7, 7, 7, 7, 9, 15, 12, 19, 28, 17, 17, 14, 19, 13, 7, 6, 9, 13, 10, 11, 194, 194, 196, 196, 197, 199, 201, 201, 202, 204, 201, 207, 207, 206, 207, 208, 207, 206, 210, 213, 211, 211, 218, 214, 221, 215, 215, 216, 218, 219, 216, 224, 226, 223, 226, 210, 156, 111, 97, 87, 58, 17, 11, 23, 19, 7, 3, 4, 7, 14, 21, 7, 7, 8, 7, 6, 8, 8, 9, 9, 9, 9, 9, 9, 12, 12, 12, 11, 11, 11, 12, 12, 14, 14, 15, 14, 14, 13, 10, 13, 13, 22, 14, 12, 15, 17, 20, 21, 20, 20, 23, 22, 22, 20, 16, 24, 26, 29, 30, 22, 16, 15, 15, 18, 18, 18, 18, 19, 19, 24, 30, 28, 25, 20, 18, 20, 15, 13, 14, 16, 11, 7, 9, 4, 28, 106, 128, 145, 164, 160, 154, 150, 158, 153, 125, 136, 151, 160, 171, 177, 188, 184, 176, 157, 145, 163, 177, 189, 183, 181, 188, 196, 207, 216, 225, 231, 228, 221, 201, 190, 192, 176, 173, 178, 193, 202, 214, 226, 223, 228, 217, 190, 177, 173, 170, 176, 182, 190, 203, 212, 220, 217, 211, 194, 176, 158, 154, 152, 147, 143, 140, 157, 166, 141, 12, 12, 15, 14, 12, 11, 11, 11, 11, 11, 11, 11, 13, 10, 13, 10, 13, 10, 13, 10, 13, 10, 13, 10, 9, 9, 9, 9, 9, 9, 8, 7, 7, 7, 7, 7, 7, 7, 7, 7, 7, 7, 7, 8, 8, 8, 8, 8, 8, 8, 8, 8, 8, 13, 10, 12, 16, 12, 21, 23, 18, 13, 13, 16, 11, 9, 9, 12, 12, 13, 197, 194, 195, 198, 197, 199, 201, 201, 202, 203, 200, 205, 206, 206, 205, 209, 206, 206, 209, 210, 211, 214, 218, 216, 219, 216, 215, 216, 217, 217, 219, 220, 224, 227, 226, 223, 221, 168, 113, 90, 86, 60, 26, 8, 18, 13, 8, 2, 6, 14, 17, 8, 9, 9, 7, 6, 7, 8, 9, 9, 9, 9, 9, 9, 12, 12, 12, 11, 11, 11, 12, 13, 13, 13, 13, 13, 13, 8, 6, 13, 72, 20, 11, 13, 15, 17, 22, 23, 22, 33, 45, 65, 39, 19, 29, 32, 22, 16, 14, 15, 12, 11, 17, 19, 17, 18, 18, 19, 22, 23, 22, 21, 19, 17, 16, 12, 12, 13, 16, 18, 19, 19, 23, 22, 41, 50, 102, 117, 138, 137, 142, 159, 165, 118, 136, 151, 158, 168, 177, 183, 187, 188, 184, 165, 174, 187, 192, 184, 184, 190, 200, 210, 219, 229, 234, 229, 219, 209, 199, 198, 179, 183, 194, 201, 210, 219, 229, 228, 227, 217, 190, 177, 171, 173, 179, 184, 194, 205, 215, 226, 221, 217, 199, 182, 167, 161, 157, 150, 146, 145, 162, 173, 170, 68, 21, 16, 14, 12, 11, 11, 11, 11, 11, 11, 11, 11, 11, 11, 11, 11, 11, 9, 9, 9, 9, 9, 9, 8, 7, 7, 7, 7, 7, 7, 7, 7, 7, 7, 7, 7, 8, 8, 8, 8, 8, 8, 8, 8, 8, 8, 8, 13, 15, 14, 22, 18, 15, 12, 15, 13, 11, 13, 10, 11, 13, 13, 13, 193, 194, 197, 199, 197, 197, 201, 201, 202, 203, 200, 202, 204, 206, 208, 207, 205, 205, 209, 213, 212, 213, 214, 219, 215, 218, 215, 216, 217, 216, 217, 221, 224, 225, 226, 223, 224, 217, 165, 115, 101, 85, 62, 23, 9, 14, 26, 22, 12, 7, 8, 13, 13, 13, 13, 10, 9, 7, 7, 9, 9, 9, 9, 9, 9, 11, 11, 11, 11, 11, 11, 12, 12, 12, 12, 12, 12, 12, 7, 7, 9, 39, 5, 8, 12, 13, 15, 16, 22, 22, 23, 30, 53, 30, 26, 31, 31, 20, 20, 21, 22, 19, 16, 18, 18, 17, 17, 18, 19, 20, 13, 12, 11, 14, 13, 12, 12, 14, 17, 21, 29, 30, 30, 39, 35, 30, 23, 31, 53, 124, 137, 143, 161, 159, 106, 140, 154, 159, 168, 179, 181, 194, 201, 205, 183, 180, 192, 197, 185, 183, 191, 206, 221, 231, 239, 238, 231, 216, 209, 204, 201, 194, 201, 204, 207, 213, 220, 230, 231, 225, 211, 187, 178, 177, 180, 186, 190, 199, 205, 215, 230, 226, 221, 198, 185, 174, 168, 161, 154, 149, 151, 167, 179, 170, 146, 24, 16, 14, 12, 11, 11, 11, 11, 11, 11, 11, 11, 11, 11, 11, 11, 11, 9, 9, 9, 9, 9, 9, 8, 7, 7, 7, 7, 7, 7, 7, 7, 7, 7, 7, 7, 8, 8, 8, 8, 8, 8, 8, 8, 8, 8, 8, 14, 14, 19, 21, 13, 13, 13, 16, 13, 10, 11, 13, 10, 12, 13, 13, 13, 194, 195, 196, 197, 197, 199, 201, 201, 202, 203, 203, 201, 204, 206, 208, 207, 207, 207, 211, 215, 213, 213, 214, 218, 215, 217, 215, 216, 217, 218, 216, 218, 223, 222, 226, 227, 226, 230, 220, 174, 128, 104, 91, 65, 30, 11, 22, 31, 24, 13, 10, 1, 17, 15, 15, 11, 13, 10, 8, 8, 9, 9, 9, 9, 9, 9, 13, 10, 13, 10, 13, 10, 11, 11, 11, 11, 11, 11, 11, 11, 11, 11, 7, 8, 7, 6, 9, 12, 9, 13, 10, 12, 14, 22, 22, 21, 22, 26, 19, 24, 27, 28, 26, 32, 32, 27, 23, 21, 21, 20, 19, 18, 19, 19, 17, 13, 10, 13, 10, 13, 10, 13, 14, 14, 16, 16, 17, 21, 24, 27, 26, 33, 49, 43, 64, 83, 102, 145, 155, 164, 176, 169, 122, 142, 153, 160, 173, 177, 185, 196, 210, 212, 197, 190, 191, 197, 188, 184, 194, 211, 230, 239, 244, 236, 230, 211, 205, 202, 202, 205, 214, 216, 214, 219, 222, 226, 224, 229, 204, 182, 177, 181, 191, 195, 198, 202, 211, 215, 231, 231, 220, 194, 187, 181, 175, 164, 156, 150, 153, 172, 179, 172, 169, 24, 16, 14, 12, 11, 11, 11, 11, 11, 11, 11, 11, 11, 11, 11, 11, 11, 9, 9, 9, 9, 9, 9, 8, 7, 7, 7, 7, 7, 7, 7, 7, 7, 7, 7, 7, 8, 8, 8, 8, 8, 8, 8, 8, 8, 8, 11, 14, 15, 24, 16, 15, 11, 12, 15, 9, 13, 10, 13, 10, 13, 13, 13, 13, 197, 196, 193, 196, 197, 200, 202, 200, 201, 203, 204, 202, 205, 206, 205, 209, 208, 209, 214, 213, 213, 216, 216, 216, 216, 216, 215, 217, 217, 217, 219, 215, 220, 224, 224, 225, 227, 227, 227, 226, 187, 127, 100, 90, 72, 32, 13, 22, 30, 23, 4, 14, 13, 13, 13, 10, 13, 10, 13, 10, 11, 9, 9, 9, 9, 9, 9, 13, 10, 13, 10, 13, 10, 13, 10, 13, 10, 13, 10, 11, 11, 11, 11, 11, 11, 11, 11, 8, 11, 7, 13, 13, 8, 9, 11, 13, 10, 13, 10, 13, 10, 15, 11, 18, 14, 21, 27, 31, 28, 29, 33, 26, 24, 22, 22, 22, 22, 20, 19, 19, 15, 14, 15, 15, 18, 19, 19, 21, 18, 12, 9, 9, 15, 32, 82, 113, 106, 126, 123, 146, 193, 190, 200, 209, 201, 145, 140, 151, 162, 176, 181, 193, 200, 221, 220, 209, 200, 190, 192, 190, 185, 196, 215, 230, 240, 243, 230, 225, 206, 201, 200, 203, 218, 221, 219, 221, 225, 225, 230, 219, 221, 192, 178, 173, 178, 196, 198, 199, 206, 213, 214, 232, 234, 219, 192, 190, 187, 181, 168, 158, 151, 154, 175, 178, 160, 120, 24, 17, 14, 12, 11, 11, 11, 11, 11, 11, 11, 11, 11, 11, 13, 10, 13, 10, 13, 10, 9, 9, 9, 9, 9, 9, 8, 7, 7, 7, 7, 7, 7, 7, 7, 7, 7, 7, 7, 8, 8, 8, 8, 8, 8, 8, 8, 8, 8, 13, 13, 18, 24, 15, 17, 12, 12, 13, 9, 13, 10, 11, 13, 13, 13, 12, 194, 196, 195, 195, 200, 200, 201, 198, 198, 203, 202, 203, 204, 206, 208, 208, 208, 209, 213, 215, 213, 215, 215, 216, 216, 216, 216, 218, 218, 217, 217, 219, 220, 220, 222, 223, 225, 229, 227, 224, 229, 195, 133, 105, 90, 74, 39, 18, 19, 27, 18, 16, 8, 7, 9, 12, 13, 14, 11, 11, 11, 8, 8, 8, 9, 9, 9, 9, 9, 9, 11, 12, 12, 12, 12, 12, 12, 13, 10, 13, 10, 13, 10, 9, 13, 10, 11, 8, 9, 13, 10, 13, 10, 13, 10, 13, 10, 13, 10, 13, 10, 13, 10, 13, 10, 16, 19, 22, 25, 26, 28, 25, 25, 25, 23, 23, 23, 23, 21, 20, 18, 21, 19, 21, 19, 25, 26, 19, 16, 12, 15, 47, 77, 94, 112, 129, 143, 157, 167, 177, 196, 193, 197, 204, 207, 157, 146, 157, 167, 181, 190, 200, 206, 222, 224, 208, 197, 191, 194, 193, 187, 196, 214, 222, 230, 235, 224, 209, 192, 195, 196, 200, 220, 219, 218, 217, 219, 222, 224, 220, 203, 184, 181, 177, 184, 196, 192, 199, 208, 206, 210, 233, 230, 214, 188, 188, 187, 184, 175, 166, 155, 158, 170, 180, 146, 60, 16, 18, 14, 12, 11, 11, 11, 11, 11, 11, 11, 11, 11, 11, 9, 9, 9, 9, 9, 9, 9, 9, 9, 8, 7, 7, 7, 7, 7, 7, 7, 7, 7, 7, 7, 7, 8, 8, 8, 8, 7, 7, 7, 8, 7, 9, 13, 15, 21, 19, 18, 14, 14, 14, 11, 8, 11, 12, 13, 13, 12, 11, 194, 196, 195, 195, 200, 196, 199, 197, 198, 202, 202, 203, 204, 207, 205, 209, 212, 212, 210, 212, 212, 212, 214, 215, 215, 215, 215, 216, 220, 218, 215, 221, 218, 222, 222, 223, 225, 227, 226, 222, 223, 230, 194, 134, 108, 97, 86, 43, 15, 12, 24, 24, 16, 1, 6, 11, 14, 13, 11, 11, 11, 9, 9, 9, 9, 9, 9, 9, 9, 9, 13, 10, 11, 11, 11, 12, 12, 12, 12, 12, 12, 11, 12, 13, 11, 11, 11, 11, 11, 11, 11, 12, 12, 12, 11, 12, 13, 15, 17, 20, 22, 23, 25, 26, 25, 24, 23, 23, 23, 21, 20, 18, 16, 18, 16, 14, 15, 25, 61, 113, 125, 124, 128, 153, 169, 177, 185, 195, 204, 188, 184, 187, 194, 203, 158, 155, 163, 169, 182, 193, 203, 210, 222, 221, 203, 194, 196, 201, 202, 193, 197, 210, 216, 222, 222, 215, 192, 184, 183, 186, 193, 208, 208, 207, 211, 216, 217, 215, 213, 185, 174, 177, 184, 192, 196, 198, 208, 218, 218, 222, 233, 226, 207, 183, 186, 190, 189, 178, 169, 159, 164, 166, 183, 184, 133, 27, 18, 14, 14, 11, 11, 11, 11, 11, 11, 11, 11, 11, 11, 9, 9, 9, 9, 9, 9, 9, 9, 9, 8, 7, 7, 7, 7, 7, 7, 7, 7, 7, 7, 7, 7, 8, 8, 8, 8, 7, 7, 7, 8, 8, 11, 13, 15, 21, 17, 14, 13, 13, 12, 13, 10, 9, 11, 12, 13, 13, 12, 11, 193, 195, 196, 195, 199, 196, 197, 200, 201, 200, 202, 203, 204, 206, 207, 208, 213, 213, 211, 211, 213, 211, 214, 214, 214, 214, 216, 217, 220, 218, 216, 220, 219, 221, 222, 225, 226, 227, 220, 230, 228, 228, 230, 202, 135, 111, 94, 81, 49, 12, 16, 16, 24, 15, 6, 8, 12, 15, 11, 11, 11, 13, 10, 13, 10, 13, 10, 9, 9, 9, 9, 9, 9, 13, 10, 13, 10, 13, 10, 13, 10, 12, 12, 12, 12, 12, 12, 11, 12, 13, 12, 11, 11, 13, 10, 13, 10, 13, 10, 13, 10, 12, 12, 12, 11, 11, 12, 8, 13, 10, 12, 13, 15, 17, 21, 22, 21, 22, 25, 26, 25, 20, 20, 15, 12, 9, 7, 13, 92, 137, 146, 147, 150, 154, 172, 179, 180, 184, 188, 191, 175, 169, 173, 182, 188, 147, 155, 162, 168, 180, 192, 205, 212, 217, 213, 192, 194, 197, 200, 204, 203, 198, 206, 209, 210, 209, 206, 179, 170, 173, 180, 189, 195, 196, 197, 204, 210, 208, 199, 191, 172, 179, 188, 192, 195, 189, 200, 207, 220, 221, 229, 234, 228, 195, 180, 182, 187, 188, 176, 169, 158, 162, 172, 183, 191, 181, 95, 22, 15, 13, 11, 11, 11, 11, 11, 11, 11, 11, 11, 11, 9, 9, 9, 9, 9, 9, 9, 9, 9, 8, 7, 7, 7, 7, 7, 7, 7, 7, 7, 7, 7, 7, 8, 8, 8, 8, 7, 7, 7, 7, 9, 12, 12, 16, 22, 17, 12, 13, 14, 11, 8, 9, 11, 12, 13, 13, 12, 11, 193, 195, 197, 197, 198, 197, 197, 204, 205, 199, 202, 203, 204, 205, 209, 207, 209, 209, 210, 212, 214, 211, 214, 214, 214, 214, 216, 219, 217, 217, 218, 218, 220, 219, 223, 223, 224, 224, 220, 221, 224, 228, 224, 224, 207, 151, 111, 93, 86, 49, 17, 1, 15, 31, 22, 17, 17, 18, 11, 11, 11, 13, 10, 13, 10, 13, 10, 9, 9, 9, 9, 9, 9, 13, 10, 13, 10, 13, 10, 13, 10, 12, 12, 12, 12, 12, 12, 11, 12, 13, 12, 11, 13, 10, 13, 10, 13, 10, 13, 10, 13, 10, 12, 12, 12, 9, 12, 13, 7, 8, 8, 8, 9, 13, 10, 11, 12, 14, 15, 22, 30, 34, 32, 45, 68, 82, 82, 56, 79, 128, 143, 157, 163, 166, 165, 171, 169, 169, 164, 161, 161, 162, 154, 161, 178, 177, 135, 151, 161, 166, 178, 192, 203, 210, 213, 207, 187, 190, 197, 202, 202, 210, 200, 202, 201, 198, 195, 191, 172, 165, 169, 177, 186, 189, 190, 192, 195, 201, 196, 180, 175, 171, 176, 185, 193, 204, 185, 191, 204, 220, 226, 236, 231, 218, 178, 180, 180, 184, 186, 177, 170, 160, 154, 166, 182, 203, 178, 151, 26, 15, 12, 11, 11, 11, 11, 11, 11, 11, 11, 11, 11, 9, 9, 9, 9, 9, 9, 9, 9, 9, 8, 7, 7, 7, 7, 7, 7, 7, 7, 7, 7, 7, 7, 8, 8, 8, 8, 7, 7, 7, 7, 13, 10, 13, 12, 16, 22, 18, 13, 14, 15, 13, 10, 8, 9, 11, 12, 13, 13, 12, 11, 194, 198, 195, 199, 199, 199, 202, 197, 200, 203, 201, 201, 203, 208, 209, 207, 208, 211, 210, 213, 213, 213, 216, 215, 214, 215, 215, 217, 220, 216, 217, 218, 222, 222, 222, 223, 224, 222, 227, 227, 227, 229, 231, 231, 232, 214, 161, 113, 97, 86, 58, 25, 17, 22, 30, 20, 3, 4, 19, 19, 19, 14, 7, 11, 11, 11, 9, 9, 9, 9, 9, 9, 9, 11, 12, 13, 12, 12, 12, 12, 12, 12, 14, 13, 12, 13, 10, 11, 12, 12, 13, 10, 11, 12, 17, 17, 17, 14, 14, 13, 10, 12, 13, 10, 9, 13, 10, 13, 15, 20, 35, 52, 61, 89, 109, 121, 121, 117, 83, 127, 142, 154, 156, 147, 143, 141, 159, 162, 161, 160, 156, 153, 145, 154, 173, 175, 171, 148, 152, 155, 174, 182, 197, 203, 209, 206, 193, 172, 179, 188, 192, 204, 209, 207, 207, 195, 188, 174, 151, 154, 167, 167, 171, 177, 188, 190, 188, 184, 178, 165, 149, 154, 176, 194, 196, 194, 191, 190, 193, 203, 213, 223, 229, 209, 190, 188, 203, 191, 186, 192, 187, 169, 157, 168, 181, 186, 186, 181, 184, 71, 17, 8, 8, 11, 11, 11, 11, 11, 11, 11, 11, 11, 9, 9, 9, 9, 9, 9, 9, 9, 9, 8, 7, 7, 7, 7, 7, 7, 9, 9, 9, 9, 8, 7, 7, 7, 7, 7, 7, 7, 7, 7, 9, 11, 13, 10, 17, 19, 12, 12, 13, 12, 9, 8, 9, 12, 13, 14, 13, 12, 11, 193, 197, 198, 198, 198, 198, 202, 198, 200, 200, 202, 202, 202, 209, 209, 209, 209, 211, 211, 211, 214, 213, 213, 213, 215, 217, 216, 218, 217, 217, 216, 219, 221, 221, 221, 221, 224, 223, 226, 225, 228, 231, 233, 233, 231, 239, 217, 158, 119, 97, 87, 67, 27, 9, 18, 34, 23, 13, 10, 7, 13, 16, 14, 9, 6, 11, 11, 11, 9, 9, 9, 9, 9, 9, 9, 11, 12, 12, 12, 12, 12, 12, 12, 12, 14, 13, 12, 11, 11, 12, 12, 9, 9, 13, 10, 11, 11, 14, 3, 13, 10, 9, 21, 28, 23, 25, 39, 67, 96, 120, 130, 140, 141, 141, 142, 142, 129, 106, 119, 148, 152, 154, 153, 141, 143, 157, 158, 157, 160, 157, 155, 154, 164, 177, 173, 164, 136, 147, 156, 173, 184, 194, 202, 206, 198, 178, 154, 164, 180, 194, 200, 207, 208, 207, 200, 192, 179, 137, 151, 165, 170, 173, 178, 182, 182, 181, 177, 162, 150, 152, 164, 183, 193, 196, 192, 190, 186, 186, 190, 204, 211, 217, 203, 187, 196, 198, 190, 189, 195, 184, 172, 157, 176, 189, 194, 195, 186, 183, 137, 19, 14, 11, 11, 11, 11, 11, 11, 11, 11, 11, 11, 9, 9, 9, 9, 9, 9, 9, 9, 9, 8, 7, 7, 7, 7, 7, 7, 9, 9, 9, 9, 8, 7, 7, 7, 7, 7, 7, 7, 7, 8, 13, 10, 12, 16, 18, 15, 11, 12, 13, 11, 9, 8, 13, 10, 13, 13, 13, 12, 12, 12, 194, 196, 197, 197, 197, 197, 201, 199, 200, 199, 202, 202, 202, 207, 206, 209, 209, 209, 211, 210, 213, 212, 212, 213, 216, 218, 217, 218, 216, 217, 220, 218, 221, 221, 221, 225, 225, 222, 225, 225, 227, 230, 232, 233, 233, 233, 230, 214, 167, 115, 98, 92, 72, 30, 7, 19, 30, 30, 7, 2, 7, 13, 10, 14, 13, 11, 11, 11, 9, 9, 9, 9, 9, 9, 9, 13, 10, 11, 12, 12, 12, 12, 12, 12, 12, 14, 13, 12, 12, 12, 13, 12, 11, 11, 6, 7, 15, 23, 21, 38, 46, 55, 47, 44, 37, 59, 93, 117, 136, 155, 167, 160, 158, 159, 163, 156, 136, 113, 145, 154, 156, 149, 142, 153, 158, 161, 161, 160, 161, 162, 168, 174, 176, 169, 150, 125, 141, 157, 173, 183, 193, 201, 203, 191, 159, 130, 149, 177, 200, 197, 205, 207, 207, 207, 197, 184, 138, 155, 159, 171, 178, 179, 175, 176, 176, 172, 162, 144, 157, 171, 187, 193, 195, 191, 187, 182, 177, 173, 184, 187, 189, 179, 191, 195, 187, 189, 193, 195, 181, 173, 162, 188, 198, 204, 198, 170, 172, 155, 34, 17, 11, 11, 11, 11, 11, 11, 11, 11, 11, 11, 9, 9, 9, 9, 9, 9, 9, 9, 9, 8, 7, 7, 7, 7, 7, 7, 9, 9, 9, 9, 8, 7, 7, 7, 7, 7, 7, 7, 7, 8, 11, 12, 18, 16, 11, 13, 10, 13, 13, 13, 10, 8, 9, 11, 13, 13, 13, 12, 12, 12, 196, 195, 196, 197, 197, 197, 199, 198, 202, 200, 202, 203, 201, 207, 207, 211, 210, 208, 211, 211, 211, 211, 213, 214, 215, 217, 217, 216, 218, 218, 219, 220, 223, 223, 223, 224, 226, 224, 227, 226, 225, 228, 229, 229, 237, 233, 232, 231, 228, 181, 121, 106, 99, 75, 32, 8, 17, 22, 19, 8, 4, 6, 14, 16, 11, 11, 11, 9, 9, 9, 9, 9, 9, 9, 9, 13, 10, 11, 12, 12, 12, 12, 12, 12, 14, 13, 12, 12, 12, 13, 14, 12, 14, 21, 27, 47, 57, 66, 68, 66, 59, 47, 58, 25, 38, 65, 96, 122, 148, 158, 154, 158, 161, 174, 176, 143, 107, 130, 151, 158, 149, 152, 158, 161, 159, 159, 152, 160, 165, 172, 180, 175, 161, 133, 115, 130, 153, 166, 177, 189, 200, 202, 183, 150, 119, 136, 174, 200, 196, 203, 205, 207, 208, 198, 191, 154, 154, 163, 171, 180, 184, 173, 173, 176, 175, 165, 144, 163, 175, 186, 192, 193, 188, 185, 177, 166, 155, 156, 161, 167, 180, 189, 187, 187, 186, 188, 191, 183, 175, 173, 196, 205, 211, 205, 89, 54, 50, 19, 13, 12, 11, 11, 11, 11, 11, 11, 11, 11, 11, 9, 9, 9, 9, 9, 9, 9, 9, 9, 8, 7, 7, 7, 7, 7, 7, 9, 9, 9, 9, 8, 7, 7, 7, 7, 7, 7, 7, 7, 9, 11, 13, 17, 12, 11, 8, 12, 12, 9, 8, 9, 12, 14, 13, 12, 11, 12, 13, 197, 194, 196, 194, 198, 198, 201, 200, 202, 205, 201, 202, 205, 207, 206, 208, 210, 208, 214, 212, 214, 213, 214, 213, 217, 215, 216, 217, 218, 220, 221, 222, 225, 223, 222, 220, 225, 224, 226, 225, 226, 227, 229, 228, 227, 232, 233, 234, 229, 231, 184, 134, 111, 103, 82, 37, 6, 7, 14, 25, 15, 7, 13, 10, 14, 11, 9, 12, 11, 11, 11, 13, 10, 13, 10, 13, 10, 13, 10, 9, 9, 9, 13, 10, 11, 12, 12, 12, 12, 13, 14, 15, 13, 13, 13, 14, 15, 14, 27, 17, 7, 2, 26, 51, 70, 40, 56, 75, 51, 57, 57, 62, 89, 110, 119, 123, 126, 126, 143, 159, 143, 109, 117, 136, 150, 157, 156, 159, 165, 151, 145, 146, 157, 168, 170, 178, 179, 158, 125, 104, 117, 140, 161, 171, 185, 196, 204, 186, 157, 130, 137, 169, 197, 194, 198, 202, 207, 209, 207, 200, 169, 156, 161, 173, 181, 184, 174, 175, 180, 177, 174, 145, 165, 177, 183, 190, 189, 183, 180, 174, 163, 146, 134, 153, 165, 175, 181, 186, 183, 183, 185, 186, 177, 162, 191, 206, 211, 212, 198, 134, 28, 23, 20, 15, 12, 11, 11, 11, 11, 11, 11, 11, 11, 11, 9, 9, 9, 9, 9, 9, 9, 9, 9, 8, 7, 7, 7, 7, 7, 7, 9, 9, 9, 8, 8, 8, 7, 7, 7, 7, 7, 8, 9, 8, 11, 14, 14, 12, 11, 13, 10, 13, 9, 7, 13, 10, 11, 13, 10, 13, 12, 11, 13, 10, 9, 17, 196, 195, 196, 197, 197, 198, 203, 201, 199, 200, 202, 206, 206, 207, 204, 208, 206, 212, 209, 210, 212, 212, 213, 212, 216, 214, 217, 218, 218, 220, 221, 222, 223, 223, 222, 221, 224, 224, 225, 225, 226, 227, 227, 228, 230, 230, 232, 233, 231, 234, 230, 195, 138, 109, 99, 77, 38, 5, 12, 22, 32, 27, 8, 8, 13, 11, 12, 11, 11, 11, 13, 10, 13, 10, 13, 10, 13, 10, 9, 9, 9, 13, 10, 11, 12, 12, 12, 12, 13, 13, 14, 13, 13, 13, 13, 11, 11, 2, 1, 36, 79, 54, 49, 50, 62, 61, 64, 74, 86, 95, 97, 96, 94, 100, 102, 100, 108, 114, 125, 110, 105, 129, 147, 154, 154, 158, 153, 140, 138, 143, 152, 161, 163, 172, 179, 166, 142, 119, 124, 133, 150, 168, 182, 195, 203, 195, 175, 153, 142, 162, 183, 190, 196, 203, 206, 209, 207, 203, 192, 162, 154, 162, 176, 183, 179, 186, 192, 190, 185, 154, 158, 170, 177, 187, 189, 188, 182, 176, 166, 140, 140, 165, 174, 176, 181, 185, 184, 188, 188, 188, 191, 189, 213, 213, 215, 213, 199, 145, 26, 22, 19, 13, 11, 11, 11, 11, 11, 11, 11, 11, 11, 11, 9, 9, 9, 9, 9, 9, 9, 9, 9, 8, 7, 7, 7, 7, 7, 7, 9, 9, 9, 8, 8, 8, 7, 7, 7, 7, 7, 8, 9, 9, 12, 14, 15, 11, 9, 13, 10, 12, 9, 7, 13, 10, 11, 13, 10, 13, 12, 11, 13, 10, 11, 17, 196, 196, 196, 199, 196, 198, 199, 199, 200, 201, 203, 207, 205, 211, 211, 204, 207, 208, 208, 210, 210, 211, 213, 211, 216, 215, 218, 218, 219, 220, 221, 222, 220, 222, 222, 222, 222, 224, 224, 224, 225, 225, 224, 228, 231, 229, 230, 231, 234, 232, 230, 235, 197, 145, 116, 104, 83, 50, 16, 13, 19, 37, 28, 6, 12, 13, 10, 13, 11, 11, 11, 11, 11, 11, 13, 10, 9, 9, 9, 13, 10, 11, 12, 12, 12, 12, 12, 13, 13, 13, 13, 13, 13, 11, 13, 10, 12, 12, 48, 111, 77, 47, 42, 47, 57, 58, 61, 68, 79, 95, 102, 91, 81, 87, 96, 116, 133, 146, 143, 103, 99, 123, 138, 143, 141, 147, 152, 146, 135, 139, 148, 156, 152, 164, 175, 175, 165, 139, 125, 122, 138, 152, 174, 190, 202, 197, 190, 173, 150, 154, 160, 184, 192, 202, 210, 213, 213, 211, 202, 179, 150, 152, 165, 180, 185, 196, 202, 204, 195, 164, 151, 159, 165, 173, 184, 189, 186, 181, 173, 142, 156, 174, 188, 185, 183, 179, 185, 196, 200, 200, 208, 206, 215, 216, 216, 211, 192, 89, 18, 20, 16, 9, 13, 10, 11, 11, 11, 11, 11, 11, 11, 11, 11, 9, 9, 9, 9, 9, 9, 9, 9, 9, 8, 7, 7, 7, 7, 7, 7, 9, 9, 9, 8, 8, 8, 7, 7, 7, 7, 7, 8, 9, 11, 12, 14, 14, 13, 10, 8, 12, 11, 9, 7, 13, 10, 11, 13, 10, 13, 12, 11, 13, 10, 13, 17, 195, 197, 196, 197, 199, 200, 199, 202, 202, 203, 203, 203, 203, 204, 209, 210, 207, 207, 210, 212, 211, 213, 214, 213, 219, 218, 218, 219, 220, 220, 221, 222, 220, 221, 222, 223, 221, 223, 222, 224, 225, 224, 224, 227, 229, 228, 228, 230, 234, 241, 237, 227, 234, 210, 153, 114, 99, 89, 63, 19, 11, 17, 32, 19, 27, 13, 13, 11, 11, 11, 12, 12, 12, 11, 9, 9, 9, 13, 10, 11, 12, 12, 12, 12, 11, 12, 13, 13, 13, 13, 12, 15, 13, 10, 21, 60, 114, 145, 69, 42, 41, 40, 48, 52, 30, 30, 39, 52, 52, 60, 78, 101, 109, 120, 137, 175, 160, 111, 97, 96, 116, 125, 124, 125, 129, 126, 112, 113, 128, 142, 139, 149, 164, 172, 170, 149, 136, 118, 125, 140, 166, 183, 197, 204, 204, 195, 161, 146, 142, 176, 187, 200, 209, 211, 212, 212, 206, 176, 146, 149, 159, 174, 188, 196, 207, 211, 199, 166, 141, 148, 154, 163, 174, 185, 191, 191, 179, 153, 165, 181, 197, 188, 183, 184, 191, 199, 205, 207, 209, 212, 215, 215, 211, 207, 181, 28, 18, 19, 14, 7, 9, 11, 11, 11, 11, 11, 11, 11, 11, 11, 9, 9, 9, 9, 9, 9, 9, 9, 9, 8, 7, 7, 7, 7, 7, 7, 9, 9, 9, 8, 8, 8, 7, 7, 7, 7, 7, 8, 9, 12, 13, 14, 11, 9, 13, 10, 13, 13, 10, 9, 7, 13, 10, 11, 13, 10, 13, 12, 11, 13, 10, 15, 17, 191, 194, 194, 198, 198, 199, 200, 200, 199, 204, 203, 204, 205, 206, 204, 205, 208, 208, 208, 207, 209, 210, 211, 210, 215, 218, 217, 216, 216, 215, 216, 217, 220, 220, 222, 220, 223, 224, 221, 223, 226, 227, 224, 225, 228, 228, 230, 230, 231, 237, 235, 233, 227, 232, 215, 163, 117, 107, 100, 67, 26, 14, 30, 29, 31, 8, 4, 5, 13, 17, 17, 15, 13, 11, 9, 8, 7, 11, 11, 11, 13, 10, 13, 10, 13, 10, 12, 12, 14, 14, 13, 12, 11, 13, 10, 7, 49, 91, 113, 116, 89, 46, 47, 44, 48, 59, 56, 53, 49, 49, 60, 69, 74, 88, 115, 106, 119, 146, 145, 102, 99, 95, 119, 109, 107, 108, 98, 91, 90, 90, 105, 123, 133, 142, 151, 165, 163, 161, 141, 121, 112, 132, 151, 171, 184, 190, 193, 193, 174, 146, 138, 164, 176, 185, 193, 195, 201, 203, 201, 162, 129, 142, 151, 170, 165, 177, 196, 204, 196, 173, 134, 136, 146, 155, 165, 182, 187, 196, 184, 160, 159, 170, 178, 185, 186, 196, 204, 206, 207, 212, 214, 213, 212, 211, 206, 200, 189, 35, 14, 14, 12, 13, 10, 13, 10, 11, 11, 13, 10, 9, 9, 9, 9, 9, 9, 9, 9, 9, 9, 9, 9, 9, 9, 9, 9, 8, 8, 8, 8, 8, 8, 9, 8, 8, 7, 7, 7, 8, 8, 8, 7, 9, 8, 13, 10, 12, 13, 11, 11, 9, 12, 11, 9, 8, 9, 13, 10, 13, 10, 13, 10, 12, 12, 12, 13, 14, 19, 189, 192, 194, 197, 199, 200, 199, 200, 200, 206, 203, 204, 205, 206, 206, 206, 210, 209, 208, 205, 208, 207, 209, 208, 212, 216, 215, 214, 214, 213, 214, 215, 220, 220, 222, 219, 224, 224, 223, 223, 223, 223, 224, 225, 227, 229, 230, 231, 234, 232, 234, 232, 234, 232, 233, 216, 167, 120, 107, 98, 79, 33, 11, 18, 20, 25, 11, 4, 11, 15, 16, 16, 16, 13, 13, 10, 8, 7, 11, 11, 11, 9, 9, 9, 12, 12, 13, 13, 13, 12, 12, 7, 28, 49, 61, 81, 144, 128, 63, 59, 52, 62, 71, 73, 69, 61, 58, 60, 61, 70, 79, 80, 82, 99, 130, 133, 130, 117, 110, 130, 121, 68, 26, 26, 24, 27, 26, 31, 41, 56, 68, 86, 92, 109, 126, 124, 104, 108, 125, 144, 163, 174, 178, 178, 183, 179, 142, 139, 157, 162, 171, 182, 189, 200, 202, 194, 142, 121, 133, 145, 162, 151, 164, 190, 196, 181, 164, 126, 126, 135, 144, 159, 169, 176, 193, 181, 156, 152, 158, 164, 178, 192, 200, 205, 207, 207, 210, 213, 211, 209, 204, 201, 193, 177, 25, 13, 13, 12, 11, 11, 11, 11, 13, 10, 9, 9, 9, 9, 9, 9, 9, 9, 9, 9, 9, 9, 9, 9, 9, 9, 9, 9, 9, 9, 9, 9, 9, 8, 7, 7, 7, 7, 8, 8, 8, 8, 13, 10, 8, 12, 12, 12, 13, 10, 13, 10, 9, 12, 11, 8, 8, 13, 10, 13, 10, 13, 10, 13, 10, 12, 12, 12, 14, 22, 21, 189, 191, 194, 194, 200, 200, 199, 202, 202, 206, 204, 203, 202, 205, 205, 205, 209, 209, 209, 205, 206, 208, 207, 209, 213, 215, 214, 214, 213, 213, 214, 215, 220, 219, 221, 221, 223, 223, 222, 222, 221, 222, 225, 226, 227, 230, 229, 231, 233, 232, 231, 233, 235, 232, 229, 233, 220, 171, 124, 110, 101, 76, 31, 13, 10, 8, 21, 31, 16, 7, 4, 12, 14, 16, 15, 13, 12, 12, 11, 11, 11, 9, 9, 9, 11, 12, 13, 12, 12, 12, 11, 6, 43, 42, 49, 61, 91, 115, 79, 54, 52, 61, 69, 62, 55, 51, 51, 53, 60, 76, 106, 108, 105, 109, 123, 120, 126, 93, 61, 117, 57, 16, 14, 17, 18, 17, 15, 16, 19, 12, 12, 14, 15, 21, 39, 70, 70, 84, 128, 137, 151, 151, 148, 146, 153, 157, 127, 140, 145, 151, 164, 162, 171, 179, 180, 173, 122, 105, 125, 140, 151, 141, 149, 175, 186, 173, 159, 123, 124, 135, 141, 157, 159, 173, 183, 166, 139, 141, 146, 151, 172, 190, 197, 206, 201, 202, 208, 208, 206, 207, 201, 195, 186, 154, 18, 15, 13, 12, 11, 11, 11, 11, 13, 10, 9, 9, 9, 9, 9, 9, 9, 9, 9, 9, 9, 9, 9, 9, 9, 9, 9, 9, 9, 9, 9, 9, 9, 8, 7, 7, 7, 7, 8, 8, 8, 9, 8, 8, 14, 12, 11, 13, 10, 9, 9, 12, 13, 10, 8, 9, 13, 10, 13, 10, 13, 10, 13, 10, 12, 12, 12, 13, 22, 49, 191, 191, 193, 193, 198, 200, 198, 202, 201, 203, 202, 202, 203, 204, 204, 204, 207, 207, 208, 205, 205, 209, 206, 210, 214, 214, 214, 213, 212, 213, 214, 215, 219, 218, 220, 221, 221, 221, 221, 221, 224, 225, 226, 228, 227, 229, 230, 231, 229, 232, 230, 233, 231, 232, 237, 233, 236, 229, 181, 125, 109, 98, 72, 29, 3, 15, 27, 36, 20, 2, 9, 13, 13, 14, 14, 16, 16, 11, 11, 11, 9, 9, 9, 13, 10, 11, 12, 11, 11, 12, 11, 15, 56, 54, 63, 53, 62, 103, 81, 57, 58, 82, 80, 66, 66, 70, 77, 95, 105, 117, 150, 143, 132, 130, 121, 103, 67, 12, 9, 31, 22, 26, 16, 22, 21, 19, 17, 19, 20, 13, 17, 17, 13, 19, 15, 13, 4, 16, 107, 128, 98, 117, 134, 131, 138, 139, 121, 128, 141, 146, 147, 149, 162, 167, 170, 161, 128, 97, 120, 134, 145, 146, 154, 167, 173, 161, 148, 120, 122, 128, 132, 147, 141, 150, 166, 149, 132, 130, 132, 136, 168, 183, 197, 205, 199, 200, 206, 203, 203, 203, 201, 190, 177, 120, 15, 15, 13, 12, 11, 11, 11, 11, 13, 10, 9, 9, 9, 9, 9, 9, 9, 9, 9, 9, 9, 9, 9, 9, 9, 9, 9, 9, 9, 9, 9, 9, 9, 8, 7, 7, 7, 7, 8, 8, 8, 8, 7, 11, 14, 12, 9, 13, 10, 8, 9, 13, 10, 9, 8, 9, 13, 10, 13, 10, 13, 10, 13, 10, 12, 12, 12, 13, 11, 111, 192, 191, 193, 194, 196, 198, 197, 201, 199, 200, 201, 202, 204, 204, 204, 204, 205, 206, 207, 205, 204, 210, 205, 210, 213, 214, 214, 213, 212, 213, 214, 214, 218, 219, 220, 221, 221, 222, 222, 225, 225, 225, 227, 229, 227, 228, 230, 230, 229, 228, 231, 227, 230, 232, 231, 231, 228, 231, 233, 186, 130, 108, 100, 82, 29, 6, 15, 25, 30, 16, 9, 9, 9, 11, 15, 16, 17, 11, 11, 11, 9, 9, 9, 13, 10, 13, 10, 12, 13, 10, 13, 10, 11, 11, 7, 53, 52, 48, 50, 72, 86, 90, 77, 84, 81, 78, 80, 83, 94, 108, 132, 134, 132, 144, 141, 122, 121, 92, 51, 15, 19, 13, 18, 22, 12, 21, 17, 18, 19, 18, 18, 17, 18, 16, 19, 24, 17, 21, 12, 15, 9, 29, 81, 43, 58, 112, 128, 142, 146, 127, 110, 134, 139, 144, 162, 174, 185, 189, 169, 146, 103, 124, 134, 148, 166, 177, 184, 188, 169, 151, 135, 137, 131, 134, 142, 148, 160, 173, 143, 122, 124, 126, 129, 161, 181, 199, 199, 204, 203, 200, 198, 201, 201, 199, 184, 165, 82, 13, 15, 13, 12, 11, 11, 11, 11, 13, 10, 9, 9, 9, 9, 9, 9, 9, 9, 9, 9, 9, 9, 9, 9, 9, 9, 9, 9, 9, 9, 9, 9, 9, 8, 7, 7, 7, 7, 8, 8, 8, 8, 8, 14, 13, 11, 8, 13, 10, 7, 11, 13, 10, 8, 8, 9, 13, 10, 13, 10, 13, 10, 13, 10, 12, 12, 12, 13, 17, 157, 191, 193, 191, 191, 192, 196, 194, 199, 198, 199, 202, 202, 203, 203, 204, 203, 206, 207, 208, 204, 207, 210, 206, 212, 212, 214, 214, 213, 212, 213, 211, 216, 216, 213, 217, 221, 222, 223, 221, 228, 226, 225, 227, 228, 229, 229, 230, 230, 230, 232, 231, 228, 229, 228, 232, 233, 234, 236, 244, 230, 185, 134, 111, 101, 78, 40, 13, 10, 11, 19, 25, 32, 9, 3, 11, 12, 18, 16, 13, 12, 11, 13, 10, 13, 10, 13, 10, 13, 10, 13, 10, 13, 10, 9, 9, 9, 9, 8, 15, 26, 30, 18, 28, 47, 68, 72, 87, 77, 71, 70, 80, 91, 107, 117, 120, 117, 111, 88, 65, 25, 20, 5, 17, 16, 18, 20, 22, 24, 23, 15, 13, 10, 11, 12, 13, 13, 18, 18, 19, 20, 20, 20, 19, 18, 16, 15, 16, 19, 18, 34, 102, 139, 148, 117, 124, 139, 155, 161, 177, 185, 204, 192, 173, 153, 113, 118, 130, 153, 178, 188, 191, 193, 182, 159, 142, 154, 139, 143, 153, 170, 183, 205, 163, 143, 116, 126, 133, 154, 169, 191, 197, 197, 198, 193, 185, 186, 187, 195, 183, 101, 26, 16, 12, 12, 12, 12, 11, 11, 11, 13, 10, 9, 9, 9, 9, 9, 9, 9, 9, 9, 9, 9, 9, 9, 9, 9, 9, 9, 9, 9, 9, 9, 9, 8, 8, 8, 7, 7, 7, 8, 8, 8, 8, 11, 13, 13, 9, 9, 9, 9, 12, 9, 8, 9, 13, 10, 11, 11, 9, 13, 10, 11, 13, 10, 12, 20, 58, 175, 192, 193, 191, 190, 190, 193, 193, 199, 198, 200, 199, 203, 202, 206, 207, 206, 206, 207, 208, 205, 207, 209, 208, 214, 213, 216, 214, 213, 213, 208, 213, 211, 213, 216, 222, 221, 222, 223, 222, 227, 224, 225, 227, 228, 229, 229, 231, 231, 230, 231, 232, 226, 228, 227, 231, 232, 236, 238, 236, 235, 227, 195, 139, 118, 107, 94, 51, 13, 10, 14, 18, 31, 30, 16, 3, 8, 15, 17, 13, 12, 11, 11, 11, 11, 12, 11, 13, 10, 9, 9, 9, 9, 13, 10, 8, 7, 13, 10, 8, 12, 7, 8, 14, 24, 33, 38, 45, 58, 67, 71, 66, 50, 35, 21, 16, 14, 13, 8, 11, 18, 14, 16, 20, 23, 23, 21, 15, 6, 9, 6, 8, 9, 16, 17, 18, 19, 19, 19, 18, 18, 18, 17, 15, 15, 15, 18, 29, 101, 134, 79, 135, 138, 148, 155, 182, 185, 190, 184, 178, 162, 145, 142, 152, 163, 185, 192, 194, 205, 185, 175, 151, 151, 140, 153, 171, 188, 193, 195, 162, 150, 134, 118, 132, 155, 169, 181, 199, 195, 190, 178, 178, 175, 172, 178, 97, 27, 13, 15, 8, 12, 12, 12, 11, 11, 11, 13, 10, 9, 9, 9, 9, 9, 9, 9, 9, 9, 9, 9, 9, 9, 9, 9, 9, 9, 9, 9, 9, 9, 9, 8, 8, 8, 7, 7, 7, 8, 8, 8, 8, 12, 13, 13, 9, 9, 9, 13, 10, 11, 9, 8, 9, 13, 10, 11, 11, 9, 13, 10, 11, 11, 13, 17, 111, 183, 191, 190, 191, 190, 188, 191, 192, 199, 198, 200, 200, 202, 203, 206, 207, 206, 206, 207, 208, 206, 208, 206, 208, 213, 213, 214, 212, 211, 210, 215, 211, 197, 201, 206, 220, 221, 222, 223, 224, 228, 225, 227, 227, 228, 229, 228, 229, 230, 230, 230, 232, 227, 228, 227, 230, 231, 234, 238, 237, 232, 227, 225, 210, 155, 116, 105, 97, 64, 17, 13, 12, 25, 28, 19, 9, 13, 15, 13, 12, 11, 12, 12, 12, 13, 12, 13, 10, 9, 9, 9, 8, 7, 11, 8, 12, 13, 10, 13, 10, 1, 6, 13, 22, 15, 13, 10, 6, 8, 19, 20, 20, 17, 14, 15, 14, 16, 15, 14, 12, 17, 14, 17, 20, 21, 20, 18, 20, 18, 14, 11, 11, 11, 14, 15, 16, 19, 19, 19, 17, 16, 17, 17, 14, 11, 12, 18, 14, 18, 54, 29, 82, 146, 148, 153, 172, 179, 182, 182, 183, 171, 166, 162, 170, 176, 182, 185, 189, 196, 178, 187, 179, 162, 154, 176, 184, 196, 200, 195, 171, 155, 140, 141, 147, 149, 168, 184, 191, 186, 176, 163, 143, 118, 108, 61, 22, 22, 13, 13, 10, 12, 12, 12, 12, 11, 11, 11, 13, 10, 9, 9, 9, 9, 9, 9, 9, 9, 9, 9, 9, 9, 9, 9, 9, 9, 9, 9, 9, 9, 9, 9, 8, 8, 8, 7, 7, 7, 8, 8, 8, 9, 12, 13, 11, 9, 9, 9, 12, 13, 10, 8, 8, 9, 13, 10, 11, 11, 9, 13, 10, 11, 12, 15, 21, 147, 185, 189, 189, 191, 189, 188, 191, 192, 199, 198, 198, 204, 202, 203, 205, 206, 205, 206, 207, 208, 206, 208, 205, 207, 211, 211, 212, 209, 209, 208, 193, 136, 93, 85, 103, 171, 221, 222, 223, 226, 229, 227, 228, 227, 228, 229, 226, 227, 228, 231, 229, 232, 229, 230, 229, 231, 231, 231, 234, 235, 235, 236, 231, 234, 221, 163, 116, 109, 98, 67, 25, 4, 7, 18, 32, 20, 15, 12, 13, 12, 11, 12, 12, 12, 14, 13, 11, 9, 9, 9, 8, 6, 12, 14, 17, 15, 21, 5, 8, 17, 17, 17, 11, 3, 1, 11, 13, 11, 11, 12, 14, 18, 19, 19, 17, 16, 18, 14, 16, 21, 18, 17, 21, 30, 26, 22, 22, 20, 18, 13, 10, 11, 12, 17, 17, 17, 15, 16, 16, 17, 13, 13, 10, 11, 14, 17, 18, 21, 27, 59, 157, 165, 157, 135, 148, 169, 177, 187, 176, 170, 169, 175, 174, 176, 178, 183, 177, 163, 169, 181, 181, 174, 178, 188, 196, 202, 190, 175, 172, 176, 157, 155, 148, 148, 163, 160, 152, 141, 125, 125, 126, 80, 27, 23, 21, 12, 11, 13, 12, 12, 12, 11, 11, 11, 13, 10, 9, 9, 9, 9, 9, 9, 9, 9, 9, 9, 9, 9, 9, 9, 9, 9, 9, 9, 9, 9, 9, 9, 8, 8, 8, 7, 7, 7, 8, 8, 8, 9, 13, 13, 11, 9, 9, 9, 12, 13, 10, 8, 8, 9, 13, 10, 11, 11, 9, 9, 11, 13, 16, 39, 177, 189, 188, 189, 190, 192, 196, 196, 200, 200, 202, 201, 198, 205, 204, 207, 206, 205, 208, 210, 210, 221, 215, 209, 206, 206, 214, 215, 213, 212, 187, 105, 53, 44, 38, 49, 78, 148, 216, 223, 225, 229, 219, 224, 223, 227, 228, 226, 228, 230, 229, 231, 232, 234, 230, 232, 233, 233, 234, 233, 232, 235, 237, 235, 235, 234, 223, 164, 121, 111, 101, 78, 27, 7, 17, 22, 22, 9, 13, 10, 11, 17, 20, 15, 11, 11, 13, 10, 11, 12, 12, 14, 13, 11, 11, 11, 12, 12, 12, 12, 12, 12, 14, 14, 14, 13, 13, 13, 13, 15, 16, 17, 16, 17, 18, 24, 30, 26, 20, 19, 23, 31, 27, 42, 32, 32, 29, 24, 18, 15, 13, 15, 12, 13, 16, 17, 18, 19, 19, 19, 19, 15, 14, 18, 17, 18, 17, 21, 17, 48, 165, 175, 150, 59, 67, 115, 148, 173, 179, 174, 163, 148, 150, 157, 167, 164, 158, 150, 150, 162, 168, 177, 178, 190, 197, 179, 160, 166, 184, 187, 175, 176, 183, 172, 163, 105, 99, 142, 139, 128, 91, 23, 20, 19, 18, 13, 13, 13, 11, 11, 11, 11, 11, 11, 11, 11, 11, 11, 9, 9, 9, 9, 9, 9, 9, 9, 9, 9, 9, 9, 9, 9, 9, 9, 9, 8, 7, 7, 7, 7, 8, 8, 8, 8, 7, 8, 13, 10, 12, 12, 11, 9, 7, 11, 13, 11, 9, 12, 12, 12, 11, 11, 11, 9, 4, 13, 10, 12, 102, 184, 192, 189, 189, 190, 193, 196, 196, 198, 199, 204, 202, 202, 205, 206, 205, 207, 208, 208, 210, 210, 216, 214, 210, 209, 209, 217, 216, 210, 200, 112, 49, 44, 32, 31, 31, 45, 83, 144, 222, 227, 223, 224, 220, 221, 225, 225, 226, 228, 230, 230, 232, 230, 230, 231, 231, 230, 231, 232, 232, 232, 233, 234, 234, 237, 233, 239, 225, 171, 128, 112, 102, 74, 34, 13, 10, 15, 24, 24, 15, 13, 10, 9, 14, 19, 17, 15, 13, 12, 12, 11, 12, 12, 11, 11, 11, 11, 12, 12, 12, 12, 12, 12, 13, 13, 13, 13, 13, 13, 13, 12, 13, 13, 11, 12, 13, 13, 13, 13, 16, 24, 20, 32, 35, 47, 38, 39, 38, 30, 24, 21, 19, 17, 15, 14, 16, 16, 17, 17, 17, 17, 18, 15, 14, 18, 19, 20, 18, 23, 17, 28, 159, 161, 72, 32, 26, 25, 34, 65, 137, 157, 131, 32, 64, 104, 124, 129, 122, 89, 68, 123, 143, 142, 158, 189, 194, 190, 186, 183, 184, 188, 194, 182, 186, 181, 156, 30, 34, 109, 107, 67, 24, 20, 17, 16, 16, 13, 13, 13, 11, 11, 11, 11, 11, 11, 11, 11, 11, 11, 9, 9, 9, 9, 9, 9, 9, 9, 9, 9, 9, 9, 9, 9, 9, 9, 9, 8, 7, 7, 7, 7, 8, 8, 8, 8, 7, 9, 11, 12, 11, 13, 10, 9, 7, 12, 13, 13, 10, 13, 10, 12, 12, 12, 11, 11, 11, 13, 10, 4, 14, 16, 147, 185, 194, 189, 190, 191, 193, 195, 196, 199, 201, 205, 203, 206, 204, 207, 208, 207, 206, 209, 211, 211, 213, 213, 211, 213, 213, 218, 217, 207, 135, 48, 41, 48, 43, 29, 27, 25, 49, 82, 151, 221, 224, 229, 229, 223, 225, 224, 226, 228, 230, 229, 230, 229, 228, 232, 230, 230, 232, 233, 233, 231, 232, 232, 233, 237, 234, 235, 236, 222, 169, 129, 107, 99, 83, 44, 12, 13, 19, 25, 23, 11, 12, 15, 15, 17, 17, 14, 12, 11, 13, 10, 9, 9, 11, 11, 11, 11, 11, 11, 12, 12, 12, 13, 13, 13, 13, 13, 13, 13, 14, 13, 13, 12, 13, 14, 15, 13, 15, 16, 20, 12, 15, 22, 30, 33, 38, 41, 35, 30, 28, 25, 22, 21, 18, 16, 16, 16, 15, 15, 15, 15, 15, 14, 18, 23, 23, 21, 20, 20, 19, 75, 72, 31, 30, 28, 30, 26, 26, 18, 77, 49, 14, 30, 22, 25, 29, 30, 27, 19, 44, 124, 149, 151, 179, 192, 190, 194, 191, 197, 194, 194, 191, 182, 172, 135, 28, 20, 24, 21, 19, 19, 15, 17, 16, 15, 12, 12, 12, 11, 11, 11, 11, 11, 11, 11, 11, 11, 11, 9, 9, 9, 9, 9, 9, 9, 9, 9, 9, 9, 9, 9, 9, 9, 9, 9, 8, 7, 7, 7, 7, 8, 8, 8, 8, 8, 13, 10, 12, 11, 13, 10, 13, 10, 9, 9, 12, 12, 13, 10, 11, 12, 12, 12, 11, 11, 11, 9, 7, 16, 46, 176, 186, 198, 188, 190, 194, 194, 194, 195, 201, 202, 205, 201, 210, 204, 208, 208, 208, 208, 210, 211, 211, 213, 212, 212, 214, 214, 219, 212, 157, 60, 42, 42, 41, 40, 38, 41, 27, 24, 43, 76, 161, 219, 219, 221, 223, 223, 222, 226, 228, 230, 229, 226, 231, 230, 231, 231, 230, 230, 232, 231, 228, 231, 233, 234, 235, 236, 239, 236, 236, 231, 190, 134, 109, 108, 92, 51, 17, 13, 20, 22, 22, 12, 13, 10, 9, 17, 18, 15, 13, 11, 8, 8, 8, 11, 11, 11, 13, 10, 13, 10, 13, 10, 12, 12, 12, 12, 12, 12, 13, 13, 13, 13, 15, 13, 13, 11, 12, 13, 12, 13, 12, 13, 10, 9, 13, 10, 8, 14, 16, 27, 29, 35, 36, 33, 31, 28, 28, 28, 23, 19, 18, 17, 14, 13, 13, 14, 15, 14, 18, 23, 22, 18, 15, 20, 26, 40, 40, 41, 28, 24, 23, 22, 15, 22, 24, 17, 25, 22, 28, 26, 24, 32, 21, 17, 23, 30, 71, 97, 97, 138, 168, 186, 187, 196, 184, 188, 191, 172, 170, 54, 16, 23, 23, 26, 23, 18, 15, 14, 13, 12, 11, 11, 11, 11, 11, 11, 11, 11, 11, 11, 11, 11, 11, 9, 9, 9, 9, 9, 9, 9, 9, 9, 9, 9, 9, 9, 9, 9, 9, 9, 8, 7, 7, 7, 7, 8, 8, 8, 7, 8, 11, 13, 11, 13, 10, 9, 9, 13, 11, 11, 13, 10, 11, 12, 12, 12, 11, 11, 11, 9, 12, 14, 113, 184, 195, 199, 189, 187, 192, 194, 195, 197, 202, 202, 203, 205, 208, 208, 209, 206, 206, 206, 211, 209, 212, 210, 208, 212, 212, 214, 209, 193, 74, 48, 41, 38, 39, 46, 44, 42, 41, 30, 24, 41, 76, 166, 223, 225, 223, 221, 222, 226, 228, 226, 226, 226, 226, 231, 231, 231, 227, 231, 226, 230, 228, 230, 229, 234, 234, 233, 238, 238, 235, 236, 236, 206, 144, 118, 110, 93, 59, 14, 19, 7, 18, 29, 19, 8, 11, 17, 11, 9, 13, 10, 7, 8, 8, 12, 11, 13, 10, 13, 10, 13, 10, 13, 10, 11, 11, 11, 12, 12, 12, 13, 13, 13, 13, 14, 14, 14, 13, 13, 13, 12, 12, 12, 11, 11, 11, 11, 11, 11, 11, 14, 20, 24, 33, 38, 33, 28, 27, 23, 24, 21, 17, 14, 16, 15, 13, 14, 15, 16, 19, 17, 18, 17, 19, 22, 39, 33, 26, 25, 24, 24, 24, 23, 21, 23, 24, 24, 29, 27, 25, 28, 25, 24, 23, 26, 38, 52, 70, 34, 30, 41, 60, 89, 144, 169, 175, 122, 125, 121, 24, 18, 19, 20, 21, 20, 18, 14, 13, 11, 8, 11, 11, 11, 11, 11, 11, 9, 9, 9, 9, 9, 9, 9, 9, 9, 9, 9, 9, 9, 9, 9, 9, 9, 9, 9, 9, 9, 9, 9, 9, 8, 7, 8, 8, 8, 7, 7, 7, 8, 9, 12, 13, 9, 9, 9, 11, 13, 12, 9, 13, 10, 11, 12, 12, 12, 11, 12, 11, 9, 15, 9, 167, 189, 197, 201, 189, 188, 192, 195, 196, 198, 201, 202, 203, 203, 201, 202, 203, 206, 206, 206, 209, 211, 211, 207, 207, 210, 215, 208, 196, 108, 39, 43, 43, 38, 41, 46, 49, 46, 42, 46, 39, 16, 49, 82, 188, 218, 222, 221, 220, 225, 227, 225, 225, 225, 226, 229, 229, 229, 231, 230, 232, 230, 232, 233, 232, 233, 235, 236, 238, 240, 239, 237, 239, 238, 210, 151, 112, 108, 93, 64, 21, 3, 14, 23, 26, 19, 13, 10, 13, 8, 8, 11, 12, 11, 13, 10, 12, 11, 13, 10, 13, 10, 13, 10, 13, 10, 11, 11, 11, 12, 12, 12, 13, 13, 13, 13, 14, 14, 14, 13, 13, 13, 12, 12, 12, 13, 13, 13, 13, 13, 13, 12, 12, 14, 16, 17, 24, 26, 23, 22, 25, 22, 22, 21, 18, 18, 15, 12, 14, 15, 15, 17, 18, 20, 22, 20, 23, 36, 27, 28, 27, 27, 26, 26, 26, 25, 25, 24, 22, 29, 27, 35, 29, 21, 22, 22, 28, 54, 63, 56, 31, 31, 36, 39, 32, 33, 41, 40, 30, 25, 27, 18, 18, 19, 20, 18, 16, 15, 14, 14, 11, 8, 11, 11, 11, 11, 11, 11, 9, 9, 9, 9, 9, 9, 9, 9, 9, 9, 9, 9, 9, 9, 9, 9, 9, 9, 9, 9, 9, 9, 9, 9, 8, 7, 8, 8, 8, 7, 7, 7, 8, 9, 12, 13, 9, 9, 9, 12, 13, 11, 13, 10, 13, 10, 11, 12, 12, 12, 11, 11, 12, 11, 13, 10, 37, 175, 193, 200, 202, 190, 190, 193, 195, 197, 198, 201, 201, 202, 204, 202, 204, 205, 205, 206, 207, 208, 211, 210, 204, 206, 208, 202, 197, 123, 45, 37, 37, 38, 40, 46, 52, 55, 53, 45, 41, 47, 33, 35, 50, 93, 202, 222, 217, 222, 225, 225, 224, 225, 226, 227, 232, 232, 232, 234, 230, 234, 230, 233, 234, 234, 231, 234, 236, 233, 236, 237, 236, 236, 232, 235, 209, 152, 115, 108, 96, 77, 28, 7, 16, 22, 24, 15, 11, 4, 4, 12, 16, 15, 16, 13, 12, 11, 11, 11, 11, 11, 11, 11, 11, 11, 11, 12, 12, 12, 12, 13, 13, 13, 13, 13, 13, 12, 12, 12, 13, 13, 13, 13, 13, 13, 13, 13, 12, 11, 9, 13, 10, 14, 13, 12, 19, 25, 24, 22, 21, 19, 15, 14, 15, 15, 15, 16, 18, 21, 26, 21, 22, 30, 39, 25, 30, 29, 26, 26, 29, 28, 27, 26, 23, 32, 30, 33, 29, 22, 23, 24, 22, 22, 23, 29, 28, 30, 31, 32, 32, 36, 33, 33, 30, 24, 20, 15, 17, 20, 20, 16, 15, 13, 16, 16, 11, 9, 11, 11, 11, 11, 11, 11, 9, 9, 9, 9, 9, 9, 9, 9, 9, 9, 9, 9, 9, 9, 9, 9, 9, 9, 9, 9, 9, 9, 9, 9, 8, 7, 8, 8, 8, 7, 7, 7, 8, 13, 10, 12, 11, 9, 9, 9, 13, 13, 11, 13, 10, 11, 12, 12, 12, 12, 12, 11, 12, 13, 5, 87, 183, 196, 202, 202, 190, 192, 193, 193, 194, 196, 200, 200, 201, 203, 203, 205, 205, 204, 206, 208, 209, 209, 210, 202, 205, 207, 200, 156, 56, 34, 29, 31, 32, 42, 51, 56, 53, 52, 49, 44, 46, 49, 38, 32, 53, 114, 214, 220, 222, 227, 226, 226, 227, 229, 230, 232, 232, 232, 231, 232, 231, 231, 230, 232, 231, 230, 232, 232, 231, 232, 231, 236, 238, 234, 232, 232, 210, 160, 121, 106, 101, 82, 37, 7, 8, 15, 18, 20, 11, 6, 11, 17, 19, 18, 13, 13, 12, 12, 12, 12, 11, 11, 11, 13, 10, 13, 10, 13, 10, 11, 11, 11, 11, 12, 12, 12, 13, 13, 13, 12, 12, 12, 13, 13, 13, 13, 13, 13, 13, 14, 12, 11, 13, 10, 13, 10, 13, 10, 8, 9, 11, 16, 18, 20, 22, 19, 17, 18, 18, 17, 17, 17, 17, 19, 26, 24, 19, 18, 50, 34, 29, 29, 30, 29, 32, 32, 29, 27, 28, 31, 35, 34, 32, 26, 25, 26, 23, 17, 24, 32, 28, 28, 31, 34, 29, 28, 29, 34, 28, 30, 29, 14, 16, 16, 15, 13, 13, 13, 13, 15, 7, 7, 11, 11, 11, 11, 11, 11, 9, 9, 9, 9, 9, 9, 9, 9, 9, 9, 9, 9, 9, 9, 9, 9, 9, 9, 9, 9, 9, 9, 9, 9, 8, 7, 8, 8, 8, 7, 7, 7, 8, 11, 12, 13, 10, 9, 9, 9, 14, 12, 13, 10, 11, 12, 13, 12, 12, 12, 13, 11, 12, 14, 12, 138, 189, 197, 204, 206, 191, 193, 192, 191, 193, 193, 198, 200, 200, 199, 201, 199, 202, 203, 203, 206, 208, 207, 210, 201, 202, 202, 175, 83, 35, 41, 35, 38, 34, 42, 47, 52, 46, 44, 52, 55, 51, 49, 50, 39, 31, 62, 132, 224, 236, 224, 226, 224, 224, 225, 229, 231, 230, 229, 230, 232, 229, 230, 227, 229, 229, 229, 230, 231, 233, 233, 232, 233, 234, 236, 234, 233, 235, 222, 178, 122, 109, 101, 80, 34, 11, 11, 23, 17, 16, 7, 4, 13, 10, 16, 16, 11, 12, 13, 12, 11, 6, 13, 10, 13, 10, 13, 10, 13, 10, 13, 10, 13, 10, 13, 10, 13, 10, 13, 10, 13, 10, 12, 12, 12, 12, 12, 12, 12, 14, 12, 11, 12, 13, 13, 12, 12, 13, 13, 12, 12, 11, 12, 12, 11, 12, 11, 9, 11, 17, 21, 20, 20, 21, 19, 17, 19, 20, 13, 20, 18, 21, 15, 20, 26, 46, 28, 27, 30, 31, 32, 31, 29, 28, 28, 27, 29, 31, 29, 31, 29, 28, 28, 28, 29, 28, 32, 30, 43, 41, 36, 35, 28, 27, 25, 26, 21, 15, 15, 14, 13, 13, 13, 15, 14, 12, 8, 7, 11, 11, 11, 13, 10, 13, 10, 13, 10, 9, 9, 9, 9, 9, 9, 9, 9, 9, 9, 9, 9, 9, 9, 9, 9, 9, 9, 9, 9, 9, 9, 9, 8, 8, 8, 7, 7, 7, 7, 7, 7, 9, 13, 13, 9, 9, 8, 9, 12, 13, 10, 9, 13, 10, 11, 11, 11, 11, 11, 11, 9, 13, 10, 13, 10, 32, 178, 201, 198, 201, 202, 190, 192, 191, 190, 193, 193, 198, 199, 199, 197, 198, 199, 199, 202, 201, 203, 205, 206, 208, 211, 200, 189, 101, 39, 34, 40, 37, 40, 36, 46, 51, 49, 45, 44, 55, 60, 57, 47, 54, 54, 37, 34, 71, 165, 229, 223, 224, 217, 219, 221, 224, 229, 229, 229, 231, 231, 230, 229, 227, 228, 229, 228, 230, 232, 233, 233, 233, 232, 235, 238, 237, 238, 237, 236, 229, 180, 129, 109, 99, 81, 48, 19, 21, 6, 16, 17, 13, 10, 7, 7, 11, 9, 13, 16, 14, 7, 3, 13, 10, 13, 10, 13, 10, 11, 11, 11, 9, 9, 9, 13, 10, 12, 12, 12, 12, 12, 12, 13, 13, 13, 12, 12, 12, 12, 12, 12, 12, 13, 13, 13, 13, 13, 13, 13, 13, 13, 12, 12, 15, 15, 20, 23, 21, 23, 27, 26, 22, 21, 18, 17, 16, 13, 14, 15, 26, 26, 25, 22, 21, 26, 27, 28, 27, 26, 25, 28, 28, 29, 31, 28, 27, 31, 29, 26, 26, 33, 36, 40, 30, 20, 20, 22, 21, 25, 27, 20, 14, 14, 14, 14, 14, 14, 16, 16, 17, 12, 9, 11, 11, 11, 9, 9, 9, 9, 9, 9, 9, 9, 9, 9, 9, 9, 9, 9, 9, 9, 9, 9, 9, 9, 9, 9, 9, 9, 9, 9, 8, 8, 8, 7, 7, 7, 8, 6, 7, 13, 10, 12, 12, 11, 9, 8, 13, 10, 13, 10, 8, 8, 13, 10, 13, 10, 13, 10, 11, 11, 13, 10, 11, 5, 13, 10, 11, 79, 178, 197, 202, 198, 185, 188, 189, 190, 188, 193, 194, 199, 197, 196, 199, 196, 200, 196, 201, 200, 200, 201, 203, 201, 196, 191, 138, 45, 37, 37, 37, 39, 42, 42, 47, 54, 51, 49, 47, 54, 58, 53, 52, 57, 57, 58, 35, 44, 92, 193, 229, 229, 223, 222, 223, 221, 227, 227, 229, 230, 230, 230, 229, 227, 228, 229, 228, 229, 230, 231, 231, 231, 232, 233, 236, 238, 239, 238, 235, 239, 229, 185, 139, 112, 97, 85, 54, 23, 4, 14, 25, 24, 15, 5, 4, 8, 12, 17, 19, 14, 7, 11, 11, 13, 10, 11, 11, 11, 9, 9, 9, 9, 11, 11, 11, 12, 12, 12, 13, 11, 12, 14, 13, 12, 12, 12, 12, 12, 12, 12, 12, 13, 13, 13, 13, 13, 13, 14, 12, 13, 12, 16, 22, 26, 22, 27, 62, 49, 26, 27, 23, 19, 16, 21, 18, 16, 21, 20, 19, 20, 24, 23, 23, 21, 21, 22, 23, 20, 24, 24, 21, 20, 24, 23, 19, 17, 17, 23, 17, 23, 19, 19, 18, 19, 22, 20, 17, 15, 15, 15, 15, 15, 16, 16, 16, 23, 12, 8, 11, 11, 11, 9, 9, 9, 9, 9, 9, 9, 9, 9, 9, 9, 9, 9, 9, 9, 9, 9, 9, 9, 9, 9, 9, 9, 8, 8, 8, 8, 8, 8, 7, 7, 7, 8, 6, 7, 13, 10, 11, 11, 13, 10, 8, 8, 11, 9, 8, 9, 13, 10, 13, 10, 13, 10, 11, 11, 13, 10, 13, 10, 5, 9, 12, 131, 181, 186, 171, 150, 130, 188, 188, 191, 188, 192, 192, 196, 196, 196, 196, 196, 199, 197, 199, 198, 199, 199, 199, 197, 189, 158, 73, 33, 37, 35, 33, 40, 43, 49, 45, 49, 51, 51, 41, 51, 54, 50, 58, 62, 57, 53, 48, 34, 47, 100, 204, 227, 224, 226, 225, 222, 227, 227, 228, 228, 229, 230, 229, 227, 228, 229, 228, 228, 229, 231, 231, 231, 232, 233, 234, 235, 238, 238, 238, 239, 237, 234, 202, 138, 110, 100, 96, 60, 19, 13, 22, 30, 26, 13, 10, 2, 6, 7, 12, 19, 20, 14, 13, 12, 13, 10, 11, 11, 11, 9, 9, 9, 9, 13, 10, 13, 10, 13, 10, 12, 12, 12, 12, 11, 12, 14, 14, 13, 12, 12, 12, 12, 11, 11, 11, 13, 13, 13, 13, 13, 13, 13, 12, 12, 12, 9, 13, 20, 25, 27, 46, 57, 34, 30, 35, 21, 20, 19, 14, 16, 20, 21, 19, 19, 22, 18, 16, 18, 17, 17, 18, 16, 19, 20, 17, 16, 17, 18, 17, 17, 17, 18, 17, 19, 18, 17, 19, 21, 23, 19, 16, 16, 16, 16, 16, 16, 17, 16, 16, 21, 17, 9, 11, 11, 11, 9, 9, 9, 9, 9, 9, 9, 9, 9, 9, 9, 9, 9, 9, 9, 9, 9, 9, 9, 9, 9, 9, 8, 7, 7, 7, 8, 8, 8, 7, 7, 7, 8, 6, 7, 13, 10, 13, 10, 13, 10, 13, 10, 8, 9, 12, 9, 8, 13, 10, 13, 10, 13, 10, 13, 10, 11, 11, 13, 10, 8, 8, 7, 35, 144, 157, 137, 124, 114, 114, 189, 188, 192, 188, 191, 189, 192, 195, 196, 193, 198, 197, 199, 200, 198, 198, 199, 196, 195, 168, 86, 33, 40, 35, 33, 31, 39, 42, 51, 44, 50, 51, 51, 37, 47, 51, 55, 61, 52, 64, 51, 52, 54, 37, 52, 136, 215, 226, 228, 227, 226, 228, 227, 226, 227, 228, 230, 229, 227, 228, 229, 228, 228, 228, 232, 232, 232, 231, 232, 232, 232, 234, 237, 236, 237, 236, 236, 245, 211, 141, 115, 105, 100, 69, 25, 16, 29, 25, 15, 8, 6, 3, 9, 13, 15, 19, 14, 13, 13, 10, 11, 11, 11, 9, 9, 9, 9, 13, 10, 13, 10, 13, 10, 12, 12, 12, 13, 10, 13, 11, 12, 14, 15, 13, 12, 12, 12, 11, 11, 11, 13, 13, 13, 13, 13, 13, 12, 11, 12, 13, 10, 13, 10, 13, 10, 9, 22, 25, 32, 39, 26, 34, 56, 20, 24, 21, 24, 18, 23, 22, 23, 22, 18, 17, 17, 21, 18, 17, 18, 21, 19, 23, 20, 19, 21, 22, 19, 16, 15, 14, 13, 20, 19, 19, 19, 22, 23, 20, 19, 17, 16, 16, 16, 16, 18, 17, 16, 18, 25, 15, 11, 11, 11, 9, 9, 9, 9, 9, 9, 9, 9, 9, 9, 9, 9, 9, 9, 9, 9, 9, 9, 9, 9, 9, 9, 8, 7, 7, 7, 8, 8, 8, 7, 7, 7, 8, 6, 7, 11, 9, 9, 13, 10, 7, 9, 12, 8, 8, 11, 13, 10, 13, 10, 13, 10, 11, 11, 13, 10, 13, 10, 9, 7, 69, 126, 117, 121, 112, 112, 109, 188, 188, 188, 191, 188, 189, 190, 191, 192, 194, 196, 197, 196, 200, 199, 200, 194, 194, 187, 111, 42, 42, 39, 32, 35, 33, 38, 38, 49, 49, 47, 49, 54, 49, 47, 54, 52, 57, 53, 58, 60, 52, 56, 41, 29, 78, 147, 222, 221, 228, 223, 225, 227, 225, 226, 228, 229, 228, 225, 228, 231, 230, 229, 228, 230, 231, 230, 231, 230, 233, 233, 233, 234, 236, 239, 239, 236, 237, 239, 214, 158, 118, 107, 92, 78, 32, 11, 18, 21, 17, 21, 5, 4, 8, 15, 19, 13, 13, 13, 11, 11, 11, 11, 11, 13, 10, 9, 9, 9, 9, 11, 11, 11, 12, 12, 12, 12, 12, 12, 13, 13, 13, 12, 13, 12, 11, 13, 13, 13, 12, 12, 12, 12, 12, 12, 13, 10, 9, 9, 13, 10, 11, 13, 18, 23, 25, 27, 28, 23, 25, 35, 53, 23, 27, 25, 26, 26, 21, 18, 27, 20, 14, 20, 17, 21, 25, 28, 22, 22, 29, 23, 21, 20, 19, 20, 20, 21, 29, 18, 15, 20, 21, 21, 21, 20, 22, 19, 19, 18, 19, 18, 17, 19, 22, 17, 12, 11, 13, 10, 9, 9, 9, 9, 9, 9, 9, 9, 9, 9, 9, 9, 9, 9, 9, 9, 9, 9, 9, 9, 9, 9, 9, 8, 8, 8, 7, 7, 7, 7, 7, 7, 7, 6, 9, 11, 13, 10, 8, 7, 11, 13, 13, 8, 9, 13, 10, 13, 10, 13, 10, 13, 10, 13, 13, 10, 9, 12, 12, 12, 125, 143, 139, 129, 127, 122, 117, 185, 187, 189, 189, 187, 189, 186, 187, 190, 193, 195, 197, 197, 202, 199, 198, 198, 193, 148, 46, 35, 42, 37, 34, 37, 38, 41, 41, 48, 50, 43, 43, 51, 50, 48, 55, 52, 48, 57, 62, 65, 61, 64, 54, 44, 43, 78, 162, 220, 223, 225, 223, 225, 224, 226, 228, 229, 227, 225, 227, 231, 227, 227, 227, 231, 234, 231, 230, 230, 232, 232, 233, 234, 234, 237, 238, 238, 239, 236, 238, 221, 162, 121, 108, 106, 81, 37, 14, 21, 34, 26, 20, 7, 6, 11, 16, 13, 13, 13, 12, 12, 12, 12, 11, 13, 10, 9, 9, 9, 9, 11, 11, 11, 12, 12, 12, 12, 12, 12, 11, 11, 13, 13, 13, 12, 11, 12, 12, 12, 12, 12, 12, 12, 12, 12, 11, 11, 11, 11, 13, 10, 9, 11, 12, 19, 20, 26, 28, 28, 28, 63, 64, 62, 43, 38, 38, 29, 17, 31, 22, 19, 20, 26, 26, 25, 26, 25, 23, 28, 30, 23, 22, 20, 19, 22, 22, 48, 21, 18, 24, 28, 28, 25, 24, 22, 21, 20, 20, 22, 21, 20, 20, 17, 13, 10, 12, 11, 13, 10, 9, 9, 9, 9, 9, 9, 9, 9, 9, 9, 9, 9, 9, 9, 9, 9, 9, 9, 9, 9, 9, 9, 9, 8, 8, 8, 7, 7, 7, 7, 7, 7, 7, 8, 13, 10, 13, 10, 9, 7, 8, 12, 13, 13, 8, 9, 13, 10, 13, 10, 13, 10, 13, 10, 12, 13, 10, 13, 10, 8, 14, 46, 163, 160, 144, 139, 130, 128, 129, 185, 186, 188, 188, 186, 189, 185, 186, 190, 194, 199, 198, 202, 202, 200, 198, 195, 177, 86, 42, 38, 40, 37, 37, 39, 42, 38, 43, 48, 49, 43, 47, 47, 46, 47, 49, 57, 53, 62, 64, 69, 65, 58, 59, 56, 42, 40, 87, 181, 229, 224, 222, 226, 225, 226, 228, 229, 228, 228, 225, 226, 226, 227, 228, 231, 233, 231, 229, 231, 231, 231, 232, 233, 234, 236, 237, 237, 237, 237, 237, 238, 226, 169, 121, 103, 98, 83, 47, 15, 27, 14, 19, 19, 14, 13, 10, 16, 13, 13, 13, 13, 13, 13, 13, 12, 11, 13, 10, 9, 9, 9, 11, 11, 11, 12, 12, 12, 12, 12, 12, 11, 11, 12, 12, 13, 12, 11, 11, 11, 11, 12, 12, 12, 12, 12, 12, 11, 11, 11, 11, 13, 10, 11, 9, 11, 9, 12, 17, 23, 27, 27, 29, 49, 73, 57, 64, 82, 43, 25, 29, 33, 38, 25, 45, 35, 27, 31, 32, 23, 29, 36, 37, 28, 25, 24, 24, 21, 27, 25, 21, 23, 29, 48, 34, 27, 25, 24, 25, 25, 24, 24, 23, 21, 13, 10, 9, 12, 11, 13, 10, 9, 9, 9, 9, 9, 9, 9, 9, 9, 9, 9, 9, 9, 9, 9, 9, 9, 9, 9, 9, 9, 9, 9, 8, 8, 8, 7, 7, 7, 7, 7, 7, 7, 9, 11, 9, 8, 7, 8, 12, 13, 11, 8, 9, 13, 10, 13, 10, 13, 10, 13, 10, 11, 13, 10, 11, 12, 13, 10, 89, 178, 180, 149, 142, 127, 127, 132, 186, 186, 185, 186, 186, 189, 186, 187, 191, 197, 204, 202, 208, 202, 200, 198, 178, 119, 57, 44, 38, 41, 37, 40, 40, 45, 32, 38, 48, 53, 46, 49, 51, 48, 47, 52, 54, 54, 65, 65, 69, 67, 61, 63, 60, 47, 48, 59, 112, 202, 223, 224, 227, 227, 227, 228, 229, 227, 226, 225, 227, 227, 228, 229, 230, 230, 230, 229, 232, 230, 230, 232, 233, 234, 237, 236, 234, 236, 238, 236, 241, 236, 229, 173, 126, 103, 99, 86, 56, 22, 4, 12, 18, 28, 26, 18, 13, 13, 13, 13, 13, 13, 13, 12, 11, 13, 10, 9, 9, 9, 11, 11, 11, 12, 12, 12, 12, 12, 12, 12, 11, 11, 13, 10, 13, 12, 11, 11, 11, 11, 12, 12, 12, 12, 12, 12, 11, 11, 11, 13, 10, 13, 10, 12, 13, 10, 13, 10, 12, 13, 10, 9, 12, 17, 15, 24, 29, 31, 37, 35, 48, 35, 30, 27, 39, 68, 34, 82, 83, 43, 35, 30, 35, 46, 53, 67, 43, 30, 29, 26, 30, 40, 68, 33, 28, 36, 57, 63, 36, 26, 28, 30, 30, 26, 25, 25, 20, 11, 8, 12, 11, 13, 10, 9, 9, 9, 9, 9, 9, 9, 9, 9, 9, 9, 9, 9, 9, 9, 9, 9, 9, 9, 9, 9, 9, 9, 8, 8, 8, 7, 7, 7, 7, 7, 7, 6, 11, 12, 8, 7, 7, 8, 12, 13, 11, 8, 9, 13, 10, 13, 10, 13, 10, 13, 10, 13, 10, 13, 10, 11, 17, 19, 139, 181, 185, 164, 141, 128, 126, 132, 67, 68, 69, 68, 68, 68, 62, 60, 65, 74, 80, 79, 78, 76, 77, 78, 76, 77, 77, 75, 76, 77, 80, 79, 80, 83, 85, 86, 87, 87, 86, 89, 90, 91, 92, 94, 91, 82, 59, 68, 74, 80, 84, 100, 100, 110, 114, 118, 126, 125, 129, 128, 133, 134, 140, 142, 151, 158, 208, 226, 228, 233, 241, 246, 247, 253, 253, 254, 254, 254, 254, 254, 254, 254, 254, 254, 254, 254, 254, 254, 254, 254, 254, 254, 254, 254, 254, 254, 254, 254, 254, 254, 254, 254, 254, 254, 254, 254, 254, 254, 254, 254, 254, 254, 254, 254, 254, 254, 254, 254, 254, 254, 254, 254, 254, 254, 254, 254, 254, 254, 254, 254, 254, 254, 254, 254, 254, 254, 253, 253, 253, 253, 253, 253, 254, 255, 255, 255, 255, 254, 254, 255, 254, 253, 250, 252, 251, 253, 254, 251, 251, 241, 220, 197, 165, 146, 132, 128, 126, 111, 113, 114, 120, 112, 98, 95, 100, 110, 118, 118, 106, 100, 101, 111, 111, 112, 109, 106, 105, 97, 101, 99, 97, 93, 96, 97, 102, 96, 35, 43, 44, 44, 45, 42, 42, 42, 42, 41, 41, 41, 40, 39, 37, 37, 36, 38, 38, 38, 37, 37, 37, 39, 38, 37, 37, 37, 35, 34, 33, 34, 32, 34, 34, 34, 39, 39, 39, 42, 53, 66, 71, 73, 78, 79, 78, 77, 73, 70, 63, 49, 31, 20, 14, 11, 11, 8, 8, 7, 4, 4, 5, 5, 6, 9, 16, 24, 67, 67, 68, 66, 66, 66, 63, 62, 68, 76, 79, 78, 78, 78, 77, 76, 75, 76, 77, 78, 79, 80, 80, 80, 81, 83, 85, 86, 86, 87, 87, 89, 92, 93, 94, 94, 96, 87, 57, 68, 75, 80, 89, 98, 96, 110, 111, 120, 127, 129, 133, 137, 134, 135, 132, 144, 150, 180, 209, 214, 233, 238, 245, 244, 252, 253, 254, 254, 254, 254, 254, 254, 254, 254, 254, 254, 254, 254, 254, 254, 254, 254, 254, 254, 254, 254, 254, 254, 254, 254, 254, 254, 254, 254, 254, 254, 254, 254, 254, 254, 254, 254, 254, 254, 254, 254, 254, 254, 254, 254, 254, 254, 254, 254, 254, 254, 254, 254, 254, 254, 254, 254, 254, 254, 254, 254, 254, 254, 254, 254, 254, 254, 254, 254, 254, 254, 254, 254, 254, 254, 254, 255, 255, 255, 255, 252, 249, 247, 236, 221, 199, 174, 152, 139, 133, 127, 122, 115, 108, 115, 117, 114, 102, 94, 102, 112, 118, 116, 113, 115, 118, 112, 113, 114, 109, 106, 105, 101, 101, 100, 99, 98, 97, 99, 96, 100, 93, 46, 43, 46, 45, 44, 43, 44, 42, 42, 42, 40, 41, 41, 40, 39, 39, 38, 37, 37, 37, 37, 37, 37, 37, 38, 38, 37, 37, 37, 35, 34, 33, 34, 32, 34, 34, 34, 38, 38, 38, 33, 31, 31, 32, 30, 33, 43, 54, 62, 70, 70, 71, 70, 74, 70, 56, 37, 22, 8, 5, 5, 5, 5, 5, 5, 6, 5, 21, 33, 66, 67, 68, 68, 68, 68, 66, 65, 72, 80, 78, 77, 77, 78, 77, 76, 75, 76, 77, 79, 80, 80, 81, 82, 83, 84, 86, 87, 87, 88, 90, 90, 92, 93, 94, 93, 95, 91, 62, 65, 72, 82, 89, 94, 98, 107, 118, 121, 129, 134, 135, 131, 139, 138, 145, 147, 157, 181, 203, 222, 225, 242, 242, 242, 254, 253, 255, 254, 254, 254, 254, 254, 254, 254, 254, 254, 254, 254, 254, 254, 254, 254, 254, 254, 254, 254, 254, 254, 254, 254, 254, 254, 254, 254, 254, 254, 254, 254, 254, 254, 254, 254, 254, 254, 254, 254, 254, 254, 254, 254, 254, 254, 254, 254, 254, 254, 254, 254, 254, 254, 254, 254, 254, 254, 254, 254, 254, 254, 255, 255, 255, 255, 255, 255, 253, 253, 253, 253, 253, 253, 253, 254, 254, 254, 248, 243, 230, 203, 178, 160, 147, 138, 130, 123, 126, 115, 111, 112, 121, 119, 104, 97, 101, 112, 124, 123, 109, 109, 117, 127, 133, 122, 118, 117, 116, 115, 115, 115, 106, 103, 99, 100, 101, 101, 97, 91, 46, 40, 45, 48, 46, 45, 43, 45, 41, 41, 41, 40, 40, 40, 39, 39, 38, 37, 37, 36, 36, 36, 36, 36, 36, 38, 37, 36, 37, 37, 35, 34, 33, 34, 32, 33, 33, 33, 34, 34, 34, 30, 35, 36, 31, 32, 32, 31, 29, 25, 26, 29, 30, 34, 39, 42, 46, 48, 50, 47, 36, 21, 8, 8, 9, 9, 13, 10, 15, 18, 65, 65, 66, 67, 67, 67, 67, 67, 68, 76, 82, 78, 77, 76, 76, 77, 78, 77, 78, 79, 80, 81, 82, 81, 83, 84, 84, 89, 89, 90, 89, 92, 91, 92, 92, 93, 96, 94, 96, 64, 67, 72, 79, 90, 95, 89, 105, 113, 121, 132, 137, 133, 135, 144, 139, 140, 143, 160, 176, 203, 230, 224, 231, 244, 243, 250, 254, 255, 254, 254, 254, 254, 254, 254, 254, 254, 254, 254, 254, 254, 254, 254, 254, 254, 254, 254, 254, 254, 254, 254, 254, 254, 254, 254, 254, 254, 254, 254, 254, 254, 254, 254, 254, 254, 254, 254, 254, 254, 254, 254, 254, 254, 254, 254, 254, 254, 254, 254, 254, 254, 254, 254, 254, 254, 254, 254, 254, 254, 254, 255, 255, 255, 255, 255, 255, 253, 252, 252, 253, 253, 254, 254, 253, 246, 232, 217, 189, 163, 145, 139, 132, 128, 130, 130, 119, 113, 112, 121, 120, 109, 101, 102, 109, 118, 120, 114, 110, 112, 114, 118, 123, 121, 120, 113, 113, 112, 112, 110, 107, 106, 102, 101, 101, 100, 100, 91, 52, 43, 42, 43, 45, 45, 45, 44, 43, 42, 39, 40, 39, 39, 40, 39, 38, 36, 35, 35, 34, 34, 34, 35, 35, 35, 37, 36, 36, 36, 37, 35, 34, 33, 34, 32, 32, 32, 32, 32, 32, 32, 35, 31, 33, 39, 36, 31, 28, 27, 29, 29, 29, 29, 29, 28, 25, 25, 22, 22, 21, 21, 21, 20, 19, 16, 16, 16, 26, 36, 66, 66, 66, 65, 67, 68, 69, 68, 72, 83, 81, 77, 76, 79, 81, 83, 80, 81, 80, 81, 81, 83, 84, 85, 87, 87, 88, 90, 91, 92, 93, 93, 93, 93, 94, 95, 96, 93, 94, 81, 62, 70, 72, 87, 95, 107, 106, 116, 128, 132, 130, 133, 144, 146, 149, 153, 153, 157, 175, 209, 213, 228, 237, 248, 245, 251, 253, 254, 254, 254, 254, 254, 254, 254, 254, 254, 254, 254, 254, 254, 254, 254, 254, 254, 254, 254, 254, 254, 254, 254, 254, 254, 254, 254, 254, 254, 254, 254, 254, 254, 254, 254, 254, 254, 254, 254, 254, 254, 254, 254, 254, 254, 254, 254, 254, 254, 254, 254, 254, 254, 254, 254, 254, 254, 254, 254, 254, 254, 254, 251, 252, 251, 254, 255, 254, 253, 252, 252, 255, 247, 244, 233, 218, 190, 165, 151, 139, 133, 132, 126, 129, 134, 121, 113, 118, 122, 122, 115, 98, 104, 112, 115, 124, 116, 109, 112, 115, 120, 121, 122, 123, 121, 121, 119, 107, 104, 104, 102, 104, 107, 115, 108, 105, 109, 101, 48, 40, 44, 44, 45, 46, 46, 46, 44, 43, 41, 40, 39, 38, 39, 39, 37, 37, 37, 36, 35, 33, 33, 33, 34, 33, 32, 35, 35, 35, 35, 35, 33, 33, 34, 33, 32, 32, 32, 32, 32, 31, 30, 32, 32, 32, 31, 30, 29, 29, 29, 29, 29, 30, 29, 28, 27, 30, 30, 24, 22, 21, 18, 18, 20, 20, 18, 17, 20, 19, 45, 50, 68, 69, 70, 71, 72, 73, 74, 77, 84, 82, 79, 82, 82, 81, 81, 82, 83, 82, 83, 84, 84, 85, 86, 87, 88, 89, 91, 92, 92, 92, 92, 92, 94, 95, 96, 98, 96, 97, 93, 59, 71, 78, 86, 96, 96, 111, 118, 129, 129, 135, 139, 146, 147, 154, 151, 161, 151, 166, 199, 220, 233, 233, 242, 248, 251, 253, 254, 254, 254, 254, 254, 254, 254, 254, 254, 254, 254, 254, 254, 254, 254, 254, 254, 254, 254, 254, 254, 254, 254, 254, 254, 254, 254, 254, 254, 254, 254, 254, 254, 254, 254, 254, 254, 254, 254, 254, 254, 254, 254, 254, 254, 254, 254, 254, 254, 254, 254, 254, 254, 254, 254, 254, 254, 254, 254, 254, 254, 254, 249, 247, 248, 254, 252, 254, 253, 251, 247, 235, 222, 202, 172, 157, 142, 138, 132, 131, 127, 127, 131, 123, 116, 117, 121, 125, 114, 102, 102, 109, 118, 125, 117, 106, 115, 120, 119, 119, 120, 124, 123, 118, 119, 118, 116, 109, 103, 103, 103, 106, 108, 103, 106, 106, 93, 52, 40, 47, 45, 46, 46, 46, 46, 46, 42, 40, 39, 40, 39, 38, 39, 38, 37, 37, 36, 35, 35, 33, 33, 33, 34, 33, 32, 34, 34, 34, 35, 34, 33, 33, 33, 32, 32, 32, 32, 32, 32, 31, 30, 32, 32, 32, 31, 30, 29, 29, 29, 29, 29, 29, 28, 28, 28, 29, 27, 19, 20, 20, 22, 23, 23, 21, 19, 19, 18, 19, 24, 28, 70, 72, 74, 75, 75, 74, 71, 73, 84, 84, 83, 84, 80, 82, 81, 84, 85, 84, 85, 85, 85, 85, 86, 87, 89, 91, 91, 92, 93, 92, 92, 92, 95, 96, 97, 99, 99, 99, 102, 59, 69, 80, 84, 96, 89, 109, 116, 126, 130, 141, 142, 146, 146, 155, 162, 158, 162, 177, 197, 215, 238, 243, 249, 248, 251, 253, 254, 254, 254, 254, 254, 254, 254, 254, 254, 254, 254, 254, 254, 254, 254, 254, 254, 254, 254, 254, 254, 254, 254, 254, 254, 254, 254, 254, 254, 254, 254, 254, 254, 254, 254, 254, 254, 254, 254, 254, 254, 254, 254, 254, 254, 254, 254, 254, 254, 254, 254, 254, 254, 254, 254, 254, 254, 254, 254, 254, 254, 254, 253, 252, 254, 254, 255, 254, 244, 222, 201, 175, 155, 141, 138, 136, 135, 134, 131, 128, 132, 122, 113, 114, 119, 127, 121, 107, 106, 111, 120, 122, 124, 112, 110, 115, 118, 123, 123, 124, 125, 123, 120, 120, 120, 119, 119, 113, 105, 104, 104, 106, 107, 106, 108, 88, 46, 41, 46, 42, 46, 46, 47, 46, 46, 47, 42, 41, 40, 40, 39, 37, 38, 37, 36, 36, 35, 35, 34, 33, 33, 33, 34, 33, 32, 33, 33, 33, 34, 33, 32, 32, 32, 32, 32, 32, 32, 32, 32, 31, 30, 31, 31, 31, 30, 29, 28, 27, 28, 28, 28, 28, 27, 26, 28, 26, 25, 19, 20, 22, 24, 23, 21, 18, 19, 21, 17, 18, 29, 15, 73, 74, 74, 73, 73, 72, 69, 76, 88, 85, 81, 79, 78, 81, 83, 84, 84, 83, 84, 85, 84, 83, 85, 87, 90, 92, 92, 93, 94, 93, 93, 93, 97, 97, 98, 99, 101, 100, 103, 71, 67, 74, 82, 94, 100, 103, 118, 128, 127, 139, 142, 149, 147, 154, 154, 158, 172, 170, 191, 217, 232, 235, 246, 245, 251, 253, 254, 254, 254, 254, 254, 254, 254, 254, 254, 254, 254, 254, 254, 254, 254, 254, 254, 254, 254, 254, 254, 254, 254, 254, 254, 254, 254, 254, 254, 254, 254, 254, 254, 254, 254, 254, 254, 254, 254, 254, 254, 254, 254, 254, 254, 254, 254, 254, 254, 254, 254, 254, 254, 254, 254, 254, 254, 254, 254, 254, 254, 254, 252, 254, 250, 242, 224, 203, 174, 156, 146, 138, 135, 136, 134, 134, 135, 130, 137, 134, 121, 118, 128, 129, 121, 108, 103, 108, 119, 126, 124, 117, 113, 119, 124, 119, 121, 125, 125, 125, 125, 121, 119, 123, 123, 122, 122, 119, 112, 104, 103, 104, 104, 104, 72, 42, 45, 44, 45, 46, 44, 45, 45, 46, 47, 47, 42, 41, 41, 40, 38, 37, 37, 37, 36, 35, 35, 34, 33, 33, 33, 33, 34, 33, 32, 31, 31, 31, 33, 33, 32, 31, 30, 32, 32, 32, 32, 32, 32, 31, 30, 30, 30, 30, 28, 27, 26, 25, 27, 27, 27, 26, 25, 25, 24, 23, 24, 25, 25, 25, 24, 22, 20, 19, 19, 19, 20, 17, 30, 17, 73, 75, 73, 70, 69, 70, 72, 84, 91, 84, 77, 76, 80, 81, 84, 83, 82, 80, 82, 85, 82, 81, 84, 86, 91, 93, 91, 93, 95, 95, 95, 95, 98, 98, 99, 97, 100, 101, 106, 84, 63, 71, 83, 92, 102, 108, 118, 124, 126, 136, 143, 153, 154, 157, 163, 173, 173, 186, 194, 213, 225, 241, 247, 242, 251, 253, 254, 254, 254, 254, 253, 253, 253, 254, 254, 254, 254, 253, 254, 254, 254, 254, 253, 254, 254, 254, 254, 254, 254, 254, 254, 254, 254, 254, 254, 254, 254, 254, 254, 254, 254, 254, 254, 254, 254, 254, 254, 254, 254, 254, 254, 254, 254, 253, 253, 254, 254, 254, 254, 253, 254, 253, 253, 254, 254, 254, 253, 244, 233, 217, 193, 173, 157, 150, 140, 136, 131, 133, 132, 132, 135, 134, 134, 130, 123, 118, 127, 132, 125, 111, 107, 111, 119, 123, 125, 119, 119, 119, 123, 122, 124, 127, 129, 129, 127, 124, 122, 122, 122, 122, 121, 121, 125, 120, 116, 108, 103, 106, 90, 60, 40, 49, 46, 44, 46, 42, 42, 44, 44, 45, 45, 45, 42, 41, 40, 40, 39, 37, 37, 37, 36, 35, 35, 34, 33, 32, 32, 32, 32, 32, 31, 31, 31, 31, 32, 32, 31, 31, 30, 31, 31, 32, 32, 32, 32, 30, 31, 29, 29, 29, 28, 28, 27, 27, 28, 28, 28, 25, 23, 21, 23, 22, 23, 25, 23, 22, 20, 21, 19, 22, 18, 16, 19, 18, 17, 16, 69, 73, 71, 71, 72, 73, 76, 87, 85, 81, 78, 76, 80, 81, 84, 82, 80, 77, 80, 83, 80, 81, 84, 87, 92, 95, 93, 93, 94, 95, 96, 98, 99, 97, 100, 101, 100, 99, 101, 90, 57, 70, 78, 90, 99, 111, 108, 128, 131, 139, 142, 151, 160, 165, 169, 178, 166, 179, 197, 220, 218, 240, 249, 246, 252, 253, 254, 254, 254, 254, 253, 253, 253, 254, 254, 253, 254, 252, 252, 250, 255, 254, 253, 254, 254, 254, 254, 254, 254, 254, 254, 254, 254, 254, 254, 254, 254, 254, 254, 254, 254, 254, 254, 254, 254, 254, 254, 255, 255, 254, 254, 254, 254, 254, 253, 255, 254, 252, 254, 253, 255, 252, 251, 250, 240, 226, 207, 187, 164, 153, 143, 140, 139, 139, 133, 134, 134, 133, 131, 128, 134, 132, 129, 120, 125, 134, 129, 116, 109, 109, 119, 127, 127, 118, 118, 116, 123, 124, 124, 127, 131, 131, 131, 131, 128, 124, 122, 123, 123, 119, 121, 121, 124, 123, 121, 114, 107, 69, 43, 43, 43, 45, 45, 45, 45, 44, 43, 44, 45, 43, 42, 41, 44, 43, 42, 40, 39, 38, 38, 37, 36, 36, 35, 34, 33, 31, 31, 31, 30, 30, 30, 31, 31, 31, 31, 31, 31, 31, 30, 30, 30, 31, 31, 31, 31, 30, 31, 29, 29, 29, 29, 29, 29, 29, 28, 27, 27, 21, 22, 22, 24, 23, 22, 22, 20, 19, 17, 17, 18, 21, 18, 13, 17, 15, 17, 17, 68, 70, 72, 74, 75, 73, 78, 89, 85, 79, 79, 79, 81, 83, 83, 82, 80, 79, 80, 81, 85, 86, 88, 89, 93, 96, 95, 95, 95, 96, 97, 98, 97, 98, 99, 99, 98, 97, 95, 97, 56, 66, 74, 86, 95, 107, 114, 126, 132, 137, 147, 158, 161, 167, 175, 186, 182, 189, 192, 218, 234, 247, 244, 249, 253, 254, 255, 254, 254, 254, 255, 255, 255, 253, 254, 249, 250, 252, 247, 244, 254, 254, 254, 254, 254, 254, 254, 254, 254, 254, 254, 254, 254, 254, 254, 254, 254, 254, 254, 254, 254, 254, 254, 254, 254, 254, 254, 254, 254, 254, 254, 254, 254, 255, 255, 250, 253, 254, 254, 252, 248, 238, 223, 202, 182, 164, 152, 145, 145, 143, 143, 138, 138, 137, 138, 137, 134, 133, 136, 136, 132, 116, 121, 127, 133, 123, 111, 107, 116, 129, 133, 123, 118, 124, 130, 130, 130, 128, 130, 130, 133, 132, 132, 131, 129, 126, 124, 124, 123, 123, 125, 113, 122, 124, 116, 76, 43, 38, 46, 42, 43, 44, 44, 44, 44, 44, 44, 44, 45, 42, 41, 40, 42, 41, 41, 39, 38, 37, 37, 37, 36, 35, 35, 34, 33, 31, 31, 31, 30, 30, 30, 31, 31, 31, 30, 30, 30, 30, 30, 30, 30, 31, 31, 31, 30, 30, 30, 28, 28, 28, 29, 29, 29, 28, 26, 24, 22, 22, 24, 25, 22, 21, 21, 21, 19, 18, 18, 13, 21, 19, 22, 21, 21, 22, 20, 15, 72, 74, 74, 71, 69, 70, 79, 91, 89, 83, 80, 82, 83, 85, 82, 82, 85, 85, 85, 88, 92, 94, 92, 92, 95, 97, 94, 97, 99, 100, 97, 95, 96, 98, 98, 95, 97, 100, 101, 104, 75, 60, 69, 81, 89, 104, 108, 123, 130, 135, 148, 151, 159, 172, 176, 185, 188, 197, 202, 212, 230, 239, 246, 248, 254, 254, 254, 254, 254, 254, 255, 255, 255, 254, 252, 249, 246, 228, 244, 240, 252, 254, 254, 254, 254, 254, 254, 254, 254, 254, 254, 254, 254, 254, 254, 254, 254, 254, 254, 254, 254, 254, 254, 254, 254, 254, 254, 253, 253, 254, 254, 254, 254, 255, 255, 254, 254, 251, 239, 221, 198, 181, 164, 150, 144, 146, 147, 146, 140, 140, 142, 140, 139, 139, 137, 136, 137, 139, 128, 121, 124, 134, 130, 136, 112, 101, 111, 126, 134, 130, 117, 118, 126, 133, 128, 126, 128, 131, 134, 134, 133, 132, 130, 127, 127, 128, 126, 126, 124, 120, 128, 124, 118, 87, 30, 37, 44, 44, 40, 42, 43, 44, 45, 45, 45, 45, 43, 43, 42, 42, 41, 41, 41, 40, 39, 38, 38, 37, 36, 36, 35, 34, 35, 34, 33, 31, 31, 31, 30, 30, 30, 31, 31, 31, 29, 29, 29, 29, 30, 30, 30, 31, 31, 31, 29, 30, 29, 27, 27, 27, 26, 26, 26, 26, 24, 23, 22, 24, 22, 21, 21, 20, 19, 20, 19, 18, 18, 17, 21, 24, 36, 30, 23, 26, 27, 27, 71, 77, 72, 69, 64, 69, 83, 95, 91, 83, 81, 83, 84, 82, 83, 88, 90, 91, 90, 94, 94, 95, 93, 93, 96, 99, 98, 97, 96, 98, 98, 98, 95, 98, 97, 97, 99, 100, 99, 102, 103, 65, 66, 77, 85, 99, 117, 113, 129, 142, 140, 153, 163, 172, 175, 187, 195, 200, 208, 219, 225, 239, 252, 241, 253, 254, 255, 254, 254, 254, 255, 255, 255, 255, 253, 238, 107, 77, 83, 161, 251, 252, 255, 254, 254, 254, 254, 254, 254, 254, 254, 254, 254, 254, 254, 254, 254, 254, 254, 254, 254, 254, 255, 254, 254, 254, 254, 253, 253, 254, 254, 254, 254, 253, 251, 233, 222, 197, 180, 163, 153, 150, 150, 151, 146, 145, 142, 143, 140, 138, 138, 139, 138, 137, 140, 147, 138, 123, 125, 133, 134, 130, 110, 102, 111, 122, 128, 131, 125, 111, 128, 135, 134, 130, 131, 135, 131, 131, 135, 134, 132, 130, 128, 128, 126, 124, 126, 127, 123, 120, 124, 61, 44, 46, 42, 47, 43, 42, 41, 41, 42, 43, 45, 46, 46, 45, 42, 41, 39, 44, 43, 42, 39, 38, 37, 37, 36, 35, 36, 36, 34, 34, 35, 34, 33, 31, 31, 31, 30, 30, 30, 31, 31, 31, 29, 29, 29, 29, 30, 30, 30, 31, 31, 31, 28, 31, 28, 27, 27, 27, 24, 23, 23, 23, 23, 23, 24, 21, 21, 21, 20, 19, 18, 19, 18, 17, 17, 23, 21, 35, 50, 29, 23, 30, 31, 29, 70, 67, 66, 67, 67, 72, 87, 92, 89, 84, 85, 85, 85, 89, 92, 94, 90, 92, 93, 92, 96, 95, 93, 92, 95, 93, 98, 97, 96, 98, 98, 100, 96, 96, 98, 99, 100, 101, 101, 101, 100, 98, 74, 66, 75, 95, 101, 115, 119, 130, 140, 165, 169, 177, 194, 198, 200, 200, 205, 213, 236, 234, 243, 250, 251, 252, 253, 253, 251, 253, 252, 253, 249, 251, 218, 141, 76, 56, 56, 72, 155, 248, 250, 254, 254, 254, 254, 254, 254, 254, 254, 254, 254, 254, 254, 254, 254, 254, 254, 254, 254, 254, 254, 253, 253, 254, 254, 254, 255, 255, 254, 249, 239, 224, 208, 183, 171, 161, 155, 153, 150, 148, 147, 146, 145, 145, 146, 144, 140, 140, 142, 136, 139, 137, 130, 123, 125, 130, 134, 128, 115, 107, 113, 119, 123, 135, 124, 121, 120, 136, 134, 135, 134, 133, 131, 130, 134, 134, 135, 135, 132, 129, 129, 128, 128, 127, 126, 124, 122, 121, 101, 69, 53, 50, 46, 37, 38, 39, 44, 42, 40, 40, 40, 40, 41, 42, 44, 43, 42, 41, 41, 42, 40, 40, 38, 35, 35, 35, 36, 37, 35, 34, 33, 33, 33, 33, 32, 31, 31, 31, 31, 31, 31, 31, 31, 31, 29, 29, 29, 30, 31, 29, 28, 27, 28, 28, 28, 27, 27, 27, 25, 24, 22, 22, 21, 21, 21, 19, 19, 19, 21, 20, 19, 18, 18, 17, 17, 25, 30, 71, 59, 29, 29, 30, 30, 31, 66, 64, 67, 68, 70, 77, 91, 93, 89, 85, 85, 89, 92, 92, 92, 92, 92, 94, 94, 92, 93, 92, 92, 93, 88, 94, 93, 91, 90, 96, 96, 98, 96, 95, 98, 101, 101, 102, 103, 102, 102, 102, 101, 85, 76, 83, 102, 109, 110, 120, 138, 155, 168, 174, 185, 191, 200, 205, 216, 218, 235, 238, 246, 246, 251, 252, 255, 252, 254, 254, 253, 251, 240, 187, 146, 77, 52, 44, 50, 62, 70, 244, 254, 254, 254, 254, 254, 254, 254, 254, 254, 254, 254, 254, 254, 254, 254, 254, 254, 254, 254, 254, 254, 254, 255, 254, 254, 250, 244, 237, 224, 210, 189, 175, 164, 158, 157, 159, 152, 150, 147, 146, 145, 144, 143, 144, 145, 144, 144, 140, 138, 138, 130, 120, 123, 130, 132, 131, 122, 108, 108, 119, 129, 131, 132, 113, 116, 132, 135, 136, 134, 133, 135, 136, 134, 134, 135, 133, 134, 134, 132, 130, 128, 126, 125, 125, 126, 126, 124, 123, 97, 58, 57, 52, 50, 45, 40, 33, 36, 42, 42, 38, 34, 33, 35, 41, 42, 43, 45, 41, 40, 39, 38, 37, 37, 35, 35, 35, 36, 37, 35, 34, 33, 33, 33, 33, 32, 31, 31, 31, 31, 31, 31, 31, 31, 31, 29, 29, 29, 30, 31, 29, 28, 27, 28, 28, 28, 27, 27, 27, 25, 24, 22, 22, 21, 21, 21, 20, 20, 20, 21, 20, 19, 17, 17, 18, 25, 24, 57, 72, 72, 41, 35, 30, 29, 31, 68, 73, 72, 72, 74, 82, 93, 92, 87, 85, 87, 88, 88, 92, 91, 91, 92, 93, 91, 87, 84, 83, 84, 85, 81, 85, 82, 84, 94, 97, 97, 98, 97, 97, 99, 102, 102, 104, 103, 103, 105, 104, 108, 104, 105, 96, 84, 100, 115, 122, 134, 150, 168, 175, 185, 197, 208, 208, 224, 228, 239, 239, 245, 250, 254, 253, 253, 254, 254, 251, 250, 223, 162, 143, 91, 44, 38, 41, 44, 51, 62, 209, 248, 254, 254, 254, 254, 254, 254, 254, 254, 254, 254, 254, 254, 254, 254, 254, 254, 254, 254, 254, 253, 253, 251, 249, 243, 231, 214, 197, 177, 166, 161, 157, 156, 151, 152, 150, 150, 150, 148, 147, 144, 144, 143, 144, 145, 144, 141, 139, 132, 121, 121, 129, 129, 131, 125, 113, 109, 115, 126, 133, 134, 121, 112, 126, 134, 131, 132, 129, 133, 135, 137, 138, 137, 136, 134, 132, 133, 132, 131, 131, 128, 126, 125, 124, 126, 126, 124, 120, 114, 78, 63, 58, 52, 54, 53, 46, 35, 32, 35, 38, 33, 31, 32, 37, 39, 40, 41, 42, 41, 40, 38, 35, 36, 36, 36, 36, 36, 37, 35, 34, 33, 33, 33, 33, 33, 32, 32, 32, 32, 31, 31, 31, 31, 31, 29, 29, 29, 30, 31, 29, 28, 27, 28, 28, 28, 27, 27, 27, 25, 24, 22, 22, 21, 21, 21, 21, 21, 21, 21, 20, 19, 17, 17, 22, 27, 41, 74, 68, 70, 63, 38, 33, 31, 32, 75, 74, 75, 77, 77, 85, 94, 89, 84, 83, 84, 85, 85, 89, 89, 90, 88, 88, 86, 80, 78, 81, 81, 80, 84, 80, 84, 91, 93, 98, 98, 100, 100, 100, 101, 103, 104, 104, 104, 104, 106, 108, 108, 106, 107, 111, 115, 102, 85, 90, 118, 133, 159, 177, 201, 208, 219, 227, 228, 222, 237, 239, 250, 251, 252, 254, 254, 252, 254, 239, 187, 141, 126, 89, 41, 38, 36, 34, 36, 46, 61, 93, 246, 254, 254, 254, 254, 254, 254, 254, 254, 254, 254, 254, 254, 254, 254, 254, 254, 254, 254, 254, 253, 251, 238, 227, 208, 192, 175, 148, 156, 158, 158, 158, 153, 152, 152, 138, 150, 149, 148, 147, 145, 144, 144, 145, 147, 146, 139, 125, 121, 129, 133, 132, 125, 113, 111, 116, 119, 127, 134, 131, 113, 118, 132, 135, 134, 130, 131, 132, 133, 137, 140, 141, 138, 136, 133, 132, 132, 132, 131, 132, 128, 127, 126, 125, 125, 124, 122, 119, 120, 114, 80, 67, 66, 59, 60, 59, 53, 40, 38, 45, 35, 34, 33, 33, 35, 34, 34, 37, 38, 39, 38, 34, 36, 36, 36, 36, 37, 37, 35, 34, 33, 33, 33, 34, 33, 32, 32, 32, 32, 31, 31, 31, 31, 31, 29, 29, 29, 30, 31, 29, 28, 27, 28, 28, 28, 27, 27, 27, 25, 24, 22, 22, 21, 21, 21, 21, 21, 21, 21, 20, 19, 16, 18, 27, 34, 65, 72, 73, 70, 72, 57, 35, 33, 33, 80, 79, 78, 86, 83, 86, 90, 89, 85, 83, 85, 86, 86, 86, 85, 86, 84, 81, 81, 83, 84, 86, 90, 83, 85, 84, 95, 97, 99, 99, 100, 101, 102, 102, 102, 103, 106, 106, 107, 108, 110, 111, 112, 111, 111, 109, 112, 115, 118, 112, 93, 83, 86, 106, 116, 141, 162, 184, 188, 207, 230, 240, 254, 254, 253, 246, 254, 253, 225, 151, 126, 114, 69, 34, 32, 32, 32, 35, 37, 39, 50, 52, 139, 247, 246, 250, 247, 251, 252, 252, 253, 251, 252, 251, 252, 252, 251, 252, 255, 253, 251, 247, 212, 209, 183, 182, 165, 151, 102, 91, 91, 105, 143, 158, 144, 148, 154, 145, 114, 124, 143, 146, 146, 147, 143, 142, 137, 121, 120, 130, 135, 130, 131, 117, 109, 116, 120, 124, 130, 130, 107, 114, 134, 140, 139, 137, 134, 135, 134, 133, 132, 131, 133, 131, 136, 137, 135, 135, 135, 130, 130, 130, 130, 125, 126, 125, 124, 125, 125, 125, 123, 122, 124, 98, 66, 70, 70, 63, 57, 58, 52, 45, 44, 37, 30, 28, 30, 34, 36, 34, 37, 38, 34, 35, 36, 35, 37, 38, 35, 34, 34, 34, 35, 35, 35, 33, 32, 31, 33, 33, 33, 30, 30, 30, 30, 30, 30, 30, 29, 29, 29, 29, 29, 29, 28, 27, 27, 27, 25, 24, 24, 24, 22, 22, 23, 22, 21, 21, 20, 19, 20, 20, 17, 16, 22, 26, 53, 71, 70, 69, 73, 71, 70, 52, 35, 31, 80, 83, 79, 78, 83, 86, 88, 86, 80, 79, 86, 88, 86, 83, 86, 79, 78, 81, 87, 86, 84, 82, 83, 85, 88, 97, 99, 99, 100, 99, 100, 101, 104, 106, 107, 109, 108, 110, 110, 112, 115, 117, 117, 116, 117, 118, 119, 120, 122, 127, 130, 132, 123, 121, 129, 145, 172, 188, 196, 221, 245, 253, 253, 255, 252, 254, 248, 187, 129, 117, 103, 57, 34, 33, 31, 31, 31, 32, 34, 34, 34, 42, 56, 179, 251, 250, 247, 253, 254, 254, 254, 255, 250, 251, 253, 253, 251, 250, 246, 233, 223, 200, 147, 148, 142, 131, 120, 78, 129, 139, 140, 96, 100, 104, 108, 116, 134, 143, 152, 124, 109, 83, 120, 147, 147, 134, 123, 135, 136, 136, 128, 115, 107, 115, 129, 126, 129, 133, 114, 107, 133, 134, 136, 137, 137, 133, 135, 131, 131, 130, 129, 130, 137, 136, 136, 135, 137, 135, 135, 130, 130, 130, 130, 127, 128, 127, 126, 126, 125, 125, 123, 123, 124, 124, 117, 80, 59, 75, 65, 60, 56, 56, 45, 39, 32, 31, 34, 35, 31, 33, 33, 33, 30, 32, 36, 36, 37, 38, 36, 35, 35, 35, 35, 35, 35, 35, 34, 33, 33, 33, 33, 30, 30, 30, 30, 30, 30, 30, 29, 29, 29, 30, 30, 30, 28, 27, 27, 27, 25, 24, 24, 24, 22, 22, 22, 21, 21, 20, 19, 19, 20, 18, 16, 19, 24, 39, 66, 69, 72, 70, 72, 70, 69, 64, 44, 36, 80, 84, 79, 78, 78, 83, 87, 82, 77, 78, 84, 84, 82, 83, 81, 81, 85, 84, 85, 86, 87, 88, 85, 96, 96, 98, 102, 101, 101, 103, 104, 105, 106, 108, 111, 113, 111, 113, 115, 117, 122, 123, 122, 122, 123, 125, 126, 126, 130, 128, 131, 133, 139, 149, 164, 173, 198, 214, 241, 252, 248, 253, 253, 249, 253, 236, 145, 119, 116, 87, 43, 32, 34, 26, 28, 29, 29, 27, 28, 30, 35, 39, 40, 56, 121, 218, 250, 250, 253, 254, 253, 253, 252, 254, 252, 246, 235, 222, 206, 193, 172, 152, 132, 135, 100, 86, 87, 74, 139, 138, 145, 101, 108, 103, 99, 100, 111, 129, 160, 112, 113, 104, 102, 106, 131, 133, 145, 142, 132, 113, 105, 115, 130, 135, 131, 130, 115, 93, 122, 134, 130, 132, 135, 133, 125, 123, 130, 140, 139, 138, 140, 139, 142, 138, 136, 134, 138, 132, 132, 128, 130, 130, 130, 129, 129, 128, 127, 127, 125, 125, 124, 123, 125, 124, 121, 119, 110, 66, 67, 70, 62, 54, 55, 48, 38, 33, 35, 35, 31, 35, 33, 32, 33, 32, 30, 31, 32, 33, 33, 34, 36, 36, 36, 36, 36, 36, 35, 34, 34, 34, 34, 31, 31, 31, 31, 31, 31, 31, 30, 30, 30, 31, 31, 31, 28, 27, 27, 26, 25, 25, 24, 24, 22, 22, 21, 21, 20, 19, 19, 19, 18, 17, 19, 24, 32, 55, 73, 68, 74, 72, 72, 71, 69, 67, 62, 41, 81, 81, 79, 83, 82, 85, 88, 82, 80, 83, 84, 83, 81, 83, 85, 86, 84, 84, 88, 93, 95, 98, 100, 100, 104, 102, 107, 108, 109, 111, 112, 113, 115, 115, 116, 119, 120, 121, 121, 123, 124, 125, 124, 123, 125, 124, 126, 128, 126, 132, 139, 147, 155, 173, 192, 219, 240, 251, 250, 251, 254, 250, 253, 252, 205, 120, 116, 90, 64, 38, 35, 30, 24, 24, 26, 27, 27, 25, 27, 28, 30, 37, 36, 44, 60, 58, 91, 159, 235, 252, 254, 250, 248, 240, 227, 208, 191, 177, 169, 163, 154, 126, 117, 117, 80, 94, 97, 91, 103, 137, 139, 103, 95, 100, 98, 96, 93, 102, 135, 119, 129, 127, 123, 133, 145, 143, 132, 112, 93, 100, 120, 130, 131, 130, 127, 101, 116, 137, 131, 131, 136, 137, 134, 135, 129, 133, 140, 141, 140, 140, 140, 138, 140, 135, 136, 136, 135, 134, 134, 131, 130, 130, 130, 128, 128, 127, 128, 128, 126, 125, 125, 124, 126, 124, 124, 124, 119, 124, 97, 72, 72, 72, 61, 56, 52, 49, 42, 34, 34, 34, 33, 34, 34, 32, 30, 30, 29, 29, 30, 31, 34, 36, 37, 37, 37, 34, 33, 33, 34, 34, 34, 32, 32, 32, 32, 32, 32, 32, 31, 31, 31, 30, 30, 30, 28, 27, 27, 25, 25, 25, 24, 24, 22, 22, 21, 20, 19, 17, 18, 19, 17, 17, 25, 30, 44, 61, 67, 71, 71, 74, 75, 72, 71, 69, 70, 58, 77, 78, 80, 80, 87, 88, 87, 85, 84, 85, 87, 90, 89, 83, 87, 90, 84, 86, 90, 92, 99, 104, 108, 108, 111, 111, 114, 114, 114, 119, 119, 119, 121, 122, 123, 123, 123, 121, 121, 121, 121, 121, 122, 126, 126, 127, 127, 133, 138, 149, 156, 177, 208, 238, 248, 252, 251, 252, 253, 254, 252, 251, 247, 152, 107, 96, 77, 43, 35, 28, 26, 25, 24, 25, 25, 25, 25, 24, 25, 26, 30, 29, 31, 31, 34, 42, 47, 51, 65, 91, 171, 233, 215, 191, 180, 170, 164, 164, 162, 165, 145, 128, 124, 113, 85, 94, 99, 107, 92, 136, 135, 103, 95, 90, 91, 114, 104, 72, 113, 131, 125, 129, 135, 144, 132, 119, 104, 95, 120, 131, 136, 136, 129, 100, 113, 137, 137, 132, 131, 132, 129, 132, 131, 135, 128, 137, 142, 140, 140, 139, 141, 139, 137, 137, 137, 137, 136, 136, 135, 134, 132, 132, 129, 130, 130, 129, 127, 129, 128, 124, 124, 124, 121, 124, 124, 124, 124, 123, 123, 119, 103, 69, 78, 63, 63, 55, 52, 43, 35, 29, 30, 33, 36, 35, 33, 27, 30, 30, 31, 31, 32, 32, 32, 35, 36, 34, 34, 33, 32, 32, 32, 31, 31, 31, 31, 31, 31, 31, 31, 31, 31, 30, 30, 30, 28, 25, 24, 25, 24, 23, 21, 21, 20, 20, 21, 20, 19, 18, 20, 18, 16, 17, 28, 36, 57, 61, 65, 72, 76, 76, 74, 75, 74, 75, 74, 70, 77, 81, 80, 78, 91, 89, 85, 83, 83, 83, 85, 88, 88, 85, 88, 95, 97, 97, 98, 100, 104, 108, 110, 111, 112, 114, 118, 118, 118, 120, 119, 119, 116, 116, 116, 118, 118, 117, 120, 122, 122, 124, 125, 129, 137, 134, 139, 149, 157, 187, 223, 247, 252, 254, 254, 253, 253, 252, 254, 252, 251, 199, 124, 90, 81, 61, 38, 31, 28, 25, 24, 24, 25, 25, 25, 25, 25, 23, 24, 24, 25, 27, 30, 23, 33, 29, 31, 28, 36, 46, 44, 66, 95, 166, 160, 163, 161, 162, 161, 161, 148, 111, 118, 112, 78, 98, 100, 96, 81, 127, 132, 112, 104, 103, 109, 120, 114, 63, 108, 114, 141, 141, 121, 106, 114, 118, 119, 122, 138, 141, 130, 122, 92, 107, 137, 142, 139, 137, 134, 133, 137, 136, 138, 132, 134, 141, 142, 141, 141, 140, 139, 138, 139, 140, 137, 137, 137, 135, 134, 133, 132, 132, 130, 128, 129, 128, 128, 128, 127, 126, 124, 123, 122, 125, 125, 127, 126, 126, 126, 127, 132, 117, 98, 74, 74, 67, 64, 56, 51, 47, 40, 36, 36, 34, 32, 31, 32, 29, 30, 31, 31, 31, 31, 30, 30, 32, 33, 31, 33, 33, 33, 32, 32, 32, 31, 31, 31, 31, 31, 31, 31, 30, 30, 30, 29, 26, 24, 25, 24, 23, 21, 20, 20, 20, 21, 20, 19, 20, 20, 17, 17, 26, 38, 55, 66, 62, 65, 69, 73, 76, 75, 77, 77, 77, 77, 73, 82, 80, 81, 85, 88, 81, 82, 82, 82, 83, 86, 89, 89, 92, 92, 99, 103, 103, 100, 101, 108, 115, 117, 117, 116, 116, 115, 115, 115, 116, 114, 113, 113, 112, 112, 116, 117, 119, 122, 124, 127, 128, 132, 139, 144, 146, 164, 196, 231, 248, 247, 252, 252, 254, 255, 253, 253, 253, 252, 242, 173, 94, 78, 71, 54, 33, 32, 26, 24, 21, 23, 24, 25, 25, 25, 25, 24, 24, 24, 24, 24, 24, 26, 27, 41, 62, 100, 120, 100, 52, 109, 111, 104, 126, 145, 152, 158, 157, 152, 160, 156, 99, 114, 111, 73, 102, 95, 90, 90, 121, 131, 118, 105, 106, 109, 129, 112, 59, 98, 104, 122, 104, 106, 120, 122, 121, 127, 137, 130, 124, 112, 102, 96, 99, 102, 108, 128, 138, 143, 138, 146, 140, 141, 140, 141, 142, 142, 141, 142, 141, 140, 141, 139, 138, 137, 137, 137, 135, 134, 133, 132, 133, 132, 130, 131, 130, 130, 127, 127, 128, 124, 122, 124, 125, 126, 127, 126, 127, 128, 129, 126, 132, 127, 110, 77, 70, 70, 75, 68, 59, 49, 41, 38, 35, 32, 33, 32, 31, 30, 30, 30, 30, 29, 29, 29, 29, 30, 29, 31, 31, 31, 32, 32, 32, 31, 31, 31, 31, 31, 31, 31, 30, 30, 30, 29, 26, 24, 24, 23, 22, 20, 20, 20, 20, 21, 20, 19, 20, 19, 17, 22, 35, 52, 70, 71, 68, 67, 66, 69, 75, 76, 78, 79, 79, 78, 77, 82, 80, 80, 79, 81, 81, 85, 86, 87, 89, 95, 98, 98, 100, 99, 98, 104, 106, 103, 100, 104, 107, 108, 107, 106, 106, 109, 109, 109, 112, 112, 113, 114, 115, 117, 120, 124, 128, 129, 132, 137, 141, 145, 154, 184, 218, 242, 252, 253, 250, 251, 254, 254, 254, 254, 254, 252, 250, 210, 116, 60, 64, 52, 35, 28, 31, 23, 24, 23, 22, 23, 24, 25, 25, 24, 23, 22, 23, 23, 23, 27, 25, 27, 76, 118, 137, 153, 128, 127, 132, 99, 86, 86, 93, 98, 110, 124, 133, 140, 135, 127, 108, 127, 124, 94, 101, 99, 70, 100, 113, 126, 114, 108, 108, 103, 101, 84, 75, 103, 109, 116, 124, 128, 123, 127, 139, 127, 116, 123, 122, 126, 127, 115, 113, 92, 87, 107, 96, 116, 137, 140, 141, 142, 144, 144, 143, 142, 142, 143, 141, 142, 142, 140, 137, 137, 137, 137, 136, 135, 134, 132, 133, 133, 132, 133, 131, 129, 128, 127, 127, 125, 124, 124, 125, 125, 126, 125, 126, 128, 130, 134, 130, 132, 132, 119, 87, 69, 60, 65, 72, 65, 57, 53, 47, 39, 35, 33, 34, 32, 31, 31, 31, 29, 29, 29, 29, 30, 29, 29, 29, 29, 30, 30, 30, 31, 31, 31, 31, 31, 31, 31, 30, 30, 30, 27, 24, 23, 23, 22, 22, 20, 20, 20, 20, 21, 20, 19, 18, 18, 21, 32, 48, 73, 75, 76, 74, 71, 68, 67, 71, 74, 77, 79, 79, 77, 79, 78, 82, 79, 78, 84, 81, 88, 91, 93, 96, 103, 105, 105, 104, 101, 95, 91, 94, 92, 89, 94, 101, 107, 107, 106, 106, 107, 107, 108, 112, 116, 119, 120, 122, 126, 126, 133, 136, 137, 142, 153, 170, 201, 229, 250, 252, 249, 252, 252, 254, 255, 254, 254, 252, 253, 252, 250, 184, 75, 53, 55, 47, 31, 29, 29, 25, 23, 24, 23, 22, 25, 24, 23, 24, 22, 25, 20, 20, 21, 22, 28, 23, 32, 121, 114, 117, 115, 102, 88, 68, 67, 81, 93, 95, 92, 91, 97, 106, 115, 114, 94, 105, 116, 132, 129, 111, 106, 80, 78, 99, 113, 110, 95, 97, 94, 85, 91, 112, 115, 119, 120, 123, 124, 116, 139, 111, 102, 125, 126, 129, 128, 124, 133, 131, 122, 113, 114, 89, 85, 101, 135, 141, 145, 139, 145, 143, 142, 143, 142, 141, 139, 142, 141, 139, 137, 136, 136, 138, 137, 136, 133, 135, 135, 132, 131, 130, 128, 129, 129, 126, 126, 126, 123, 124, 125, 124, 124, 125, 127, 132, 129, 132, 135, 122, 115, 100, 91, 76, 61, 56, 60, 68, 67, 59, 49, 41, 39, 34, 31, 31, 31, 30, 31, 29, 28, 29, 30, 29, 29, 28, 28, 28, 28, 28, 29, 30, 30, 30, 31, 30, 30, 29, 28, 27, 25, 22, 21, 22, 22, 21, 20, 20, 20, 20, 20, 18, 18, 18, 18, 24, 39, 65, 87, 80, 80, 78, 74, 70, 67, 67, 73, 77, 80, 79, 79, 80, 79, 75, 75, 83, 85, 86, 92, 95, 97, 100, 101, 101, 101, 101, 95, 95, 95, 96, 97, 97, 99, 100, 104, 104, 105, 107, 110, 111, 117, 119, 117, 122, 129, 137, 135, 140, 143, 158, 172, 203, 233, 251, 252, 254, 254, 254, 253, 253, 253, 254, 255, 245, 245, 252, 242, 234, 130, 60, 54, 45, 39, 30, 28, 27, 23, 18, 19, 24, 19, 20, 26, 21, 22, 21, 30, 62, 35, 25, 26, 32, 15, 30, 51, 113, 105, 79, 92, 92, 74, 70, 70, 91, 92, 99, 84, 84, 92, 97, 90, 87, 98, 107, 105, 126, 138, 146, 118, 110, 93, 74, 88, 91, 82, 97, 113, 117, 128, 123, 126, 129, 126, 118, 120, 88, 101, 117, 128, 128, 129, 129, 129, 130, 131, 132, 127, 127, 125, 117, 103, 102, 131, 127, 129, 142, 144, 142, 143, 144, 141, 141, 140, 142, 140, 138, 137, 136, 135, 137, 137, 137, 136, 136, 136, 132, 132, 133, 131, 130, 130, 129, 128, 127, 126, 126, 127, 124, 126, 127, 128, 131, 133, 134, 134, 131, 130, 115, 97, 90, 84, 83, 68, 55, 58, 67, 59, 58, 51, 50, 42, 31, 28, 32, 32, 34, 34, 31, 31, 30, 26, 26, 25, 27, 27, 27, 27, 27, 27, 28, 29, 27, 28, 25, 23, 22, 21, 20, 20, 20, 20, 20, 19, 19, 19, 18, 17, 16, 15, 20, 24, 34, 56, 82, 88, 85, 82, 80, 78, 74, 70, 68, 73, 77, 81, 83, 85, 84, 76, 78, 86, 93, 93, 95, 92, 93, 96, 97, 96, 96, 96, 95, 96, 100, 104, 104, 105, 105, 106, 104, 108, 110, 115, 117, 117, 120, 125, 120, 128, 127, 140, 141, 152, 180, 209, 242, 252, 252, 247, 250, 255, 253, 255, 254, 253, 253, 253, 254, 255, 254, 238, 254, 206, 82, 62, 44, 39, 32, 26, 28, 22, 24, 21, 13, 25, 25, 29, 44, 91, 140, 52, 19, 127, 155, 129, 136, 136, 162, 55, 24, 69, 115, 108, 75, 79, 99, 80, 81, 96, 93, 89, 84, 81, 67, 60, 93, 102, 96, 83, 100, 102, 114, 131, 132, 124, 138, 121, 90, 118, 106, 115, 122, 122, 127, 135, 131, 130, 120, 123, 116, 121, 114, 128, 126, 128, 127, 129, 129, 129, 130, 131, 131, 132, 127, 122, 122, 129, 122, 121, 133, 128, 119, 127, 144, 141, 143, 142, 141, 142, 138, 142, 136, 137, 136, 135, 136, 136, 136, 135, 135, 135, 133, 133, 134, 132, 131, 131, 131, 129, 128, 128, 129, 128, 127, 128, 129, 130, 133, 133, 132, 133, 131, 137, 122, 115, 97, 92, 89, 101, 100, 69, 53, 58, 59, 52, 58, 61, 56, 44, 32, 31, 29, 28, 32, 31, 31, 29, 29, 28, 27, 27, 27, 25, 25, 25, 26, 27, 25, 27, 25, 23, 22, 20, 19, 18, 19, 19, 19, 18, 18, 18, 18, 17, 16, 13, 20, 35, 54, 79, 89, 88, 89, 87, 85, 86, 83, 76, 72, 73, 73, 74, 79, 82, 83, 89, 87, 91, 103, 98, 99, 94, 95, 96, 97, 96, 96, 96, 99, 102, 102, 104, 104, 105, 107, 112, 113, 116, 119, 121, 123, 123, 124, 128, 131, 134, 157, 174, 212, 247, 253, 253, 251, 251, 253, 250, 246, 254, 255, 255, 254, 254, 254, 254, 254, 255, 244, 249, 154, 59, 48, 30, 40, 28, 25, 29, 22, 20, 20, 24, 96, 130, 144, 142, 129, 134, 119, 115, 116, 112, 130, 120, 128, 123, 135, 152, 61, 116, 120, 112, 73, 68, 108, 95, 89, 94, 95, 104, 93, 90, 72, 67, 92, 119, 86, 75, 103, 115, 99, 126, 138, 137, 134, 135, 110, 133, 127, 126, 128, 129, 128, 142, 132, 126, 119, 118, 109, 118, 129, 123, 126, 128, 128, 129, 128, 128, 130, 130, 131, 130, 129, 129, 129, 128, 133, 127, 130, 134, 138, 126, 125, 139, 142, 143, 142, 142, 139, 140, 138, 137, 136, 135, 135, 135, 135, 134, 134, 134, 137, 136, 132, 131, 132, 132, 132, 131, 130, 129, 129, 127, 128, 128, 129, 130, 133, 134, 134, 137, 134, 137, 138, 131, 115, 101, 96, 87, 93, 103, 105, 66, 53, 61, 58, 60, 59, 58, 59, 51, 44, 39, 36, 31, 29, 32, 31, 30, 26, 26, 26, 24, 24, 24, 25, 26, 25, 27, 25, 24, 23, 20, 20, 19, 20, 20, 20, 20, 20, 19, 19, 18, 17, 18, 33, 50, 77, 89, 92, 92, 93, 93, 91, 89, 85, 80, 77, 77, 76, 74, 75, 78, 78, 93, 90, 94, 108, 99, 99, 95, 97, 97, 98, 100, 100, 100, 103, 106, 107, 111, 112, 113, 115, 120, 117, 120, 121, 121, 122, 124, 129, 136, 165, 206, 240, 249, 248, 251, 249, 250, 247, 252, 252, 255, 254, 254, 253, 254, 254, 254, 254, 254, 254, 255, 231, 107, 55, 48, 35, 32, 27, 28, 27, 21, 20, 30, 93, 103, 126, 121, 119, 116, 104, 98, 88, 110, 90, 91, 115, 100, 103, 101, 119, 107, 135, 128, 133, 110, 62, 69, 94, 92, 93, 97, 107, 106, 95, 99, 97, 87, 65, 65, 59, 74, 112, 112, 89, 93, 134, 139, 135, 137, 131, 130, 124, 112, 114, 115, 124, 134, 123, 133, 123, 123, 130, 126, 123, 126, 126, 130, 126, 129, 128, 128, 130, 131, 131, 128, 127, 126, 124, 128, 137, 133, 131, 133, 134, 138, 131, 126, 141, 144, 141, 140, 142, 136, 141, 137, 136, 135, 135, 135, 135, 134, 134, 134, 134, 136, 134, 132, 132, 132, 132, 132, 131, 130, 128, 125, 127, 127, 128, 129, 131, 134, 136, 132, 136, 130, 138, 135, 133, 113, 97, 94, 99, 110, 107, 105, 107, 93, 64, 55, 60, 57, 51, 54, 56, 57, 50, 44, 37, 32, 31, 28, 26, 26, 26, 25, 25, 25, 25, 24, 23, 26, 25, 24, 23, 22, 21, 20, 21, 21, 21, 21, 22, 22, 21, 18, 18, 26, 47, 68, 93, 97, 95, 95, 96, 97, 94, 91, 88, 85, 83, 80, 78, 78, 77, 78, 76, 89, 88, 100, 102, 105, 99, 97, 98, 98, 98, 102, 104, 104, 110, 111, 113, 119, 119, 120, 119, 120, 119, 118, 125, 124, 122, 144, 183, 228, 247, 254, 254, 255, 255, 255, 254, 254, 253, 254, 255, 255, 254, 254, 254, 254, 252, 248, 252, 249, 250, 186, 81, 50, 41, 35, 29, 26, 26, 22, 19, 17, 16, 99, 120, 112, 112, 100, 100, 99, 104, 103, 105, 103, 80, 68, 119, 88, 90, 82, 91, 109, 126, 124, 117, 104, 78, 72, 64, 69, 93, 100, 106, 106, 101, 103, 96, 79, 61, 51, 45, 67, 109, 116, 104, 96, 132, 133, 136, 132, 123, 118, 104, 89, 90, 100, 108, 114, 119, 122, 129, 128, 131, 130, 122, 121, 123, 125, 124, 124, 127, 129, 127, 130, 129, 128, 129, 129, 129, 127, 133, 126, 132, 137, 137, 138, 140, 137, 142, 143, 143, 141, 140, 139, 138, 136, 135, 137, 138, 137, 136, 135, 132, 135, 135, 138, 136, 133, 131, 133, 129, 133, 133, 135, 128, 123, 125, 124, 127, 129, 130, 133, 131, 138, 136, 135, 136, 138, 135, 126, 111, 103, 98, 106, 110, 111, 109, 110, 107, 96, 68, 60, 59, 57, 49, 53, 57, 56, 54, 49, 44, 35, 32, 28, 27, 25, 25, 25, 23, 23, 22, 23, 24, 23, 23, 23, 22, 21, 21, 20, 19, 25, 22, 20, 21, 19, 29, 51, 62, 88, 95, 99, 100, 95, 97, 97, 95, 93, 91, 87, 85, 82, 80, 81, 79, 80, 81, 86, 91, 104, 105, 105, 102, 101, 104, 106, 106, 106, 106, 106, 113, 115, 117, 119, 120, 120, 117, 121, 122, 123, 128, 151, 189, 233, 249, 250, 253, 255, 255, 255, 255, 255, 254, 253, 253, 254, 254, 254, 254, 254, 254, 254, 252, 249, 249, 233, 129, 56, 44, 37, 28, 27, 26, 26, 23, 20, 18, 16, 14, 104, 108, 108, 100, 94, 100, 101, 92, 92, 95, 90, 86, 84, 114, 66, 80, 76, 86, 103, 115, 117, 115, 97, 88, 87, 59, 64, 73, 87, 88, 99, 88, 84, 84, 78, 70, 61, 62, 87, 113, 122, 125, 109, 122, 131, 118, 114, 106, 98, 81, 92, 99, 110, 108, 108, 104, 114, 117, 120, 130, 129, 135, 140, 130, 125, 124, 124, 124, 123, 125, 127, 128, 129, 129, 129, 129, 127, 134, 127, 132, 139, 141, 142, 141, 142, 142, 142, 141, 141, 140, 139, 138, 137, 137, 136, 136, 137, 138, 135, 136, 135, 133, 138, 136, 132, 129, 129, 129, 131, 133, 129, 129, 126, 127, 126, 124, 129, 134, 132, 132, 138, 134, 134, 137, 140, 142, 134, 119, 103, 100, 101, 107, 111, 113, 109, 107, 105, 115, 104, 81, 57, 58, 57, 60, 58, 54, 56, 53, 56, 53, 50, 43, 36, 35, 33, 29, 25, 25, 25, 23, 24, 25, 24, 23, 22, 24, 24, 25, 21, 22, 24, 21, 32, 51, 55, 81, 96, 98, 101, 102, 99, 98, 98, 95, 95, 94, 90, 88, 87, 83, 81, 82, 82, 83, 85, 96, 110, 109, 106, 107, 103, 106, 108, 107, 107, 111, 114, 113, 115, 116, 117, 116, 116, 123, 123, 141, 165, 208, 242, 252, 252, 253, 252, 254, 253, 254, 255, 255, 255, 255, 254, 253, 253, 253, 254, 254, 254, 254, 254, 248, 251, 201, 89, 53, 45, 33, 29, 25, 25, 24, 20, 18, 17, 16, 16, 24, 109, 106, 93, 86, 97, 92, 72, 83, 81, 87, 93, 98, 103, 100, 87, 72, 83, 74, 97, 112, 117, 111, 98, 102, 99, 84, 86, 76, 81, 75, 71, 79, 94, 95, 102, 103, 106, 111, 113, 125, 118, 123, 117, 130, 123, 106, 103, 69, 64, 84, 93, 110, 113, 119, 120, 117, 111, 104, 99, 97, 114, 115, 144, 144, 144, 136, 127, 127, 128, 127, 126, 128, 129, 129, 129, 129, 128, 135, 128, 123, 131, 134, 136, 135, 136, 144, 143, 141, 141, 141, 140, 139, 138, 138, 136, 136, 137, 138, 136, 137, 136, 138, 135, 135, 135, 132, 129, 131, 129, 128, 131, 130, 129, 129, 127, 126, 133, 135, 130, 133, 132, 135, 136, 133, 139, 138, 132, 124, 114, 106, 98, 102, 108, 113, 109, 110, 113, 117, 112, 106, 103, 95, 68, 57, 64, 63, 67, 66, 59, 61, 60, 61, 60, 60, 58, 53, 44, 41, 39, 37, 35, 33, 34, 33, 32, 29, 28, 28, 27, 24, 24, 31, 52, 55, 74, 87, 90, 96, 100, 101, 104, 101, 101, 98, 99, 97, 94, 92, 92, 89, 84, 82, 82, 81, 89, 102, 114, 112, 106, 111, 106, 108, 108, 108, 110, 114, 116, 114, 115, 116, 119, 125, 132, 144, 183, 233, 252, 254, 253, 253, 254, 253, 248, 253, 253, 252, 254, 254, 254, 255, 255, 255, 253, 253, 253, 253, 254, 254, 254, 239, 143, 61, 50, 36, 34, 24, 22, 27, 23, 19, 18, 19, 16, 15, 14, 27, 89, 87, 78, 101, 91, 71, 68, 88, 91, 94, 105, 94, 101, 85, 76, 59, 90, 82, 98, 117, 112, 115, 99, 113, 105, 109, 98, 91, 83, 98, 100, 103, 117, 108, 116, 121, 116, 113, 128, 121, 117, 119, 108, 122, 118, 120, 112, 86, 71, 69, 83, 107, 117, 122, 119, 111, 109, 111, 104, 80, 102, 121, 134, 143, 146, 148, 149, 141, 132, 131, 128, 128, 129, 129, 129, 129, 129, 135, 128, 144, 151, 154, 157, 157, 152, 147, 145, 143, 142, 141, 140, 140, 138, 137, 139, 138, 137, 136, 139, 136, 138, 139, 139, 138, 136, 139, 132, 132, 131, 130, 128, 129, 130, 129, 129, 129, 128, 134, 130, 132, 129, 131, 132, 133, 136, 134, 133, 131, 122, 113, 100, 95, 104, 108, 109, 114, 120, 110, 116, 112, 113, 116, 105, 111, 94, 68, 59, 62, 67, 62, 65, 64, 60, 61, 61, 59, 60, 61, 62, 56, 56, 56, 53, 52, 51, 48, 46, 43, 37, 38, 48, 56, 57, 71, 84, 91, 96, 98, 98, 100, 105, 105, 105, 102, 102, 101, 97, 94, 94, 93, 89, 85, 84, 83, 94, 106, 113, 110, 112, 113, 111, 110, 111, 113, 111, 112, 113, 109, 114, 117, 129, 153, 213, 254, 254, 254, 254, 254, 254, 254, 254, 254, 254, 254, 254, 254, 255, 254, 254, 254, 253, 253, 245, 250, 253, 251, 252, 247, 229, 83, 49, 38, 32, 29, 26, 24, 21, 18, 16, 17, 17, 18, 20, 19, 18, 62, 96, 94, 81, 109, 85, 73, 91, 94, 107, 102, 109, 101, 94, 95, 94, 72, 98, 113, 110, 124, 119, 112, 109, 120, 119, 107, 88, 89, 68, 84, 90, 108, 106, 117, 117, 112, 111, 117, 120, 107, 121, 112, 119, 113, 94, 117, 120, 105, 96, 68, 61, 83, 113, 111, 112, 114, 113, 104, 83, 95, 64, 97, 115, 135, 155, 151, 146, 145, 145, 137, 141, 123, 120, 123, 128, 132, 131, 139, 135, 149, 151, 154, 150, 148, 147, 145, 146, 143, 141, 141, 140, 138, 138, 137, 138, 137, 137, 140, 139, 135, 137, 137, 135, 133, 135, 140, 141, 136, 133, 135, 128, 135, 133, 131, 125, 131, 124, 130, 130, 132, 134, 135, 132, 138, 133, 135, 135, 132, 132, 121, 109, 103, 101, 103, 106, 113, 107, 115, 113, 117, 112, 120, 115, 118, 112, 103, 104, 100, 79, 57, 52, 62, 69, 74, 73, 68, 70, 66, 64, 56, 54, 58, 55, 52, 53, 50, 47, 47, 64, 77, 50, 53, 73, 83, 82, 91, 95, 97, 100, 102, 104, 103, 104, 105, 104, 105, 103, 98, 97, 94, 91, 86, 84, 83, 102, 112, 116, 112, 114, 115, 116, 117, 117, 115, 114, 116, 122, 122, 146, 194, 233, 252, 252, 254, 254, 254, 254, 254, 254, 254, 254, 254, 254, 254, 254, 254, 254, 254, 254, 254, 253, 253, 246, 250, 254, 249, 249, 164, 58, 36, 37, 29, 25, 25, 25, 20, 18, 16, 17, 17, 17, 18, 20, 19, 18, 42, 100, 90, 79, 88, 52, 76, 108, 98, 94, 91, 87, 85, 85, 87, 64, 54, 93, 129, 111, 134, 125, 114, 109, 113, 99, 78, 65, 67, 63, 57, 86, 94, 89, 102, 112, 123, 125, 117, 112, 118, 107, 99, 115, 105, 83, 123, 124, 118, 112, 93, 70, 80, 115, 119, 123, 115, 107, 118, 118, 95, 80, 66, 112, 117, 151, 159, 154, 148, 145, 149, 147, 144, 138, 134, 126, 119, 129, 139, 131, 147, 152, 151, 148, 146, 145, 146, 141, 140, 141, 141, 140, 139, 139, 138, 138, 139, 137, 138, 138, 138, 136, 136, 135, 135, 139, 140, 136, 131, 128, 131, 130, 131, 131, 131, 132, 129, 132, 130, 130, 131, 129, 134, 135, 138, 134, 136, 135, 137, 140, 131, 115, 107, 102, 98, 108, 116, 113, 113, 121, 123, 124, 120, 119, 112, 107, 104, 105, 109, 112, 108, 108, 104, 84, 62, 52, 58, 67, 71, 74, 73, 76, 73, 67, 66, 68, 66, 65, 60, 56, 48, 46, 71, 82, 83, 90, 91, 95, 95, 100, 100, 101, 103, 103, 104, 105, 104, 102, 100, 97, 95, 93, 90, 88, 87, 114, 123, 121, 112, 114, 115, 114, 117, 123, 123, 116, 125, 163, 221, 245, 252, 247, 254, 253, 254, 254, 254, 254, 254, 254, 254, 254, 254, 254, 254, 254, 254, 254, 254, 254, 254, 254, 254, 254, 244, 253, 241, 76, 47, 52, 33, 22, 27, 25, 23, 20, 17, 17, 15, 17, 17, 17, 18, 19, 18, 17, 37, 106, 109, 99, 70, 65, 68, 78, 81, 83, 87, 79, 76, 92, 83, 56, 78, 115, 120, 120, 127, 113, 108, 117, 84, 91, 87, 70, 47, 52, 64, 86, 94, 92, 100, 105, 104, 107, 116, 115, 111, 102, 93, 93, 116, 58, 117, 116, 113, 111, 77, 62, 73, 121, 122, 127, 114, 117, 110, 117, 112, 98, 48, 97, 112, 65, 98, 163, 149, 154, 148, 148, 149, 143, 143, 142, 136, 129, 132, 133, 147, 152, 149, 147, 145, 144, 141, 143, 142, 140, 141, 142, 140, 138, 140, 144, 140, 138, 138, 139, 141, 138, 137, 137, 138, 138, 138, 136, 136, 134, 133, 132, 130, 131, 133, 138, 131, 138, 132, 131, 131, 133, 139, 136, 136, 137, 138, 138, 137, 140, 134, 123, 114, 105, 104, 109, 116, 119, 118, 122, 115, 121, 115, 122, 124, 114, 113, 117, 120, 113, 112, 108, 105, 110, 116, 113, 103, 85, 75, 67, 52, 40, 33, 36, 38, 40, 37, 38, 36, 36, 53, 83, 87, 85, 93, 94, 92, 95, 95, 100, 100, 99, 102, 103, 103, 105, 104, 101, 101, 98, 96, 96, 95, 93, 91, 125, 132, 122, 119, 120, 122, 118, 120, 132, 146, 194, 238, 248, 251, 252, 252, 251, 250, 254, 254, 254, 254, 254, 254, 254, 254, 254, 254, 254, 254, 254, 254, 254, 254, 254, 255, 255, 255, 253, 248, 162, 52, 41, 36, 33, 25, 29, 20, 22, 19, 17, 18, 17, 17, 17, 17, 18, 18, 18, 17, 16, 92, 108, 116, 112, 107, 64, 74, 78, 91, 74, 64, 67, 67, 89, 93, 110, 117, 124, 119, 119, 125, 113, 103, 91, 72, 92, 107, 95, 55, 65, 67, 108, 116, 111, 95, 100, 113, 121, 109, 100, 113, 122, 128, 120, 114, 81, 90, 100, 115, 92, 69, 68, 61, 118, 127, 126, 112, 103, 123, 109, 101, 90, 94, 119, 114, 65, 18, 32, 72, 137, 150, 153, 150, 149, 144, 142, 145, 146, 136, 132, 150, 151, 151, 147, 145, 145, 142, 144, 143, 141, 142, 143, 142, 143, 140, 140, 140, 139, 141, 141, 139, 139, 139, 138, 137, 140, 140, 136, 135, 133, 134, 129, 134, 136, 136, 136, 139, 134, 135, 134, 133, 134, 136, 133, 136, 138, 137, 143, 145, 145, 141, 129, 119, 110, 106, 110, 114, 118, 117, 115, 118, 124, 118, 122, 123, 120, 120, 121, 114, 121, 117, 115, 115, 116, 111, 104, 101, 100, 102, 103, 102, 92, 86, 89, 91, 89, 87, 82, 83, 96, 94, 94, 92, 88, 93, 103, 96, 98, 97, 100, 101, 102, 101, 102, 103, 104, 105, 102, 99, 99, 98, 98, 97, 95, 93, 131, 137, 131, 131, 135, 142, 171, 211, 233, 244, 253, 251, 251, 254, 255, 254, 255, 255, 253, 254, 254, 254, 254, 254, 254, 254, 254, 254, 254, 253, 253, 253, 250, 253, 254, 246, 253, 253, 220, 101, 37, 35, 28, 25, 25, 24, 24, 20, 17, 17, 17, 17, 17, 17, 18, 18, 16, 16, 18, 18, 19, 119, 118, 118, 118, 112, 93, 81, 72, 88, 97, 86, 89, 96, 112, 110, 111, 114, 129, 112, 97, 110, 121, 112, 98, 81, 103, 104, 87, 50, 55, 87, 109, 131, 131, 119, 113, 111, 114, 110, 83, 109, 126, 134, 126, 119, 135, 114, 86, 112, 88, 63, 79, 46, 102, 120, 128, 122, 73, 103, 79, 106, 124, 139, 129, 116, 94, 13, 10, 18, 17, 27, 53, 101, 150, 156, 152, 151, 153, 148, 150, 152, 150, 148, 147, 147, 147, 146, 143, 142, 142, 143, 143, 143, 145, 141, 139, 142, 141, 142, 143, 143, 138, 141, 141, 140, 139, 137, 139, 141, 141, 141, 143, 140, 136, 134, 135, 135, 138, 136, 137, 137, 136, 133, 133, 134, 137, 137, 138, 142, 139, 144, 141, 135, 128, 116, 111, 114, 115, 118, 116, 116, 114, 120, 124, 120, 116, 117, 111, 113, 114, 113, 118, 115, 111, 113, 118, 117, 111, 112, 106, 104, 106, 107, 104, 103, 97, 97, 97, 97, 94, 91, 92, 95, 99, 99, 101, 99, 98, 100, 100, 100, 100, 103, 102, 102, 103, 103, 104, 103, 101, 99, 99, 98, 96, 96, 95, 126, 172, 179, 198, 219, 233, 247, 253, 252, 255, 254, 255, 255, 253, 254, 254, 254, 254, 253, 254, 254, 254, 254, 254, 254, 254, 254, 254, 254, 254, 255, 255, 253, 250, 252, 245, 242, 173, 60, 28, 32, 30, 22, 23, 22, 24, 21, 18, 16, 16, 16, 17, 17, 17, 17, 17, 16, 17, 20, 21, 23, 90, 123, 115, 114, 113, 102, 98, 94, 110, 105, 119, 120, 99, 109, 104, 99, 108, 115, 104, 96, 98, 113, 120, 107, 89, 97, 111, 87, 52, 66, 94, 108, 128, 141, 129, 131, 131, 111, 99, 86, 109, 130, 133, 137, 133, 132, 133, 98, 127, 85, 72, 79, 45, 80, 109, 116, 99, 64, 96, 111, 136, 134, 138, 133, 134, 123, 21, 15, 16, 17, 17, 18, 42, 79, 130, 163, 154, 152, 153, 158, 149, 148, 149, 150, 147, 147, 144, 144, 144, 144, 144, 145, 146, 142, 141, 142, 142, 143, 143, 143, 140, 142, 141, 141, 141, 139, 141, 142, 141, 142, 143, 141, 144, 143, 138, 138, 138, 138, 138, 138, 138, 136, 136, 136, 136, 137, 139, 140, 141, 146, 143, 138, 135, 123, 111, 111, 110, 117, 118, 122, 118, 123, 124, 114, 120, 121, 117, 117, 117, 121, 117, 117, 118, 112, 113, 115, 113, 114, 104, 105, 106, 106, 106, 109, 109, 101, 100, 101, 97, 96, 97, 92, 93, 94, 98, 102, 101, 99, 101, 104, 103, 102, 101, 103, 104, 103, 103, 103, 102, 100, 99, 98, 96, 95, 95, 115, 241, 249, 244, 250, 249, 250, 249, 255, 251, 255, 255, 255, 253, 254, 254, 254, 254, 253, 254, 254, 254, 254, 254, 254, 254, 254, 254, 254, 253, 252, 252, 251, 249, 242, 225, 113, 27, 25, 29, 19, 19, 21, 22, 22, 20, 18, 17, 15, 15, 15, 16, 16, 16, 15, 17, 17, 19, 24, 24, 25, 46, 105, 105, 109, 118, 115, 119, 94, 119, 122, 124, 126, 99, 83, 84, 83, 85, 79, 92, 95, 97, 103, 120, 113, 101, 67, 98, 86, 57, 73, 69, 94, 117, 119, 123, 131, 140, 121, 97, 91, 94, 131, 140, 142, 143, 133, 143, 130, 132, 110, 95, 70, 70, 83, 102, 90, 84, 100, 129, 140, 132, 136, 142, 124, 129, 116, 53, 15, 15, 15, 15, 15, 12, 23, 26, 62, 106, 148, 155, 150, 151, 155, 152, 152, 149, 147, 147, 147, 147, 146, 145, 146, 147, 146, 145, 143, 143, 142, 143, 144, 143, 144, 145, 145, 145, 144, 144, 143, 143, 144, 143, 141, 141, 140, 138, 141, 140, 139, 139, 139, 139, 139, 139, 137, 137, 138, 139, 140, 143, 145, 142, 142, 136, 122, 116, 109, 110, 117, 120, 121, 121, 122, 122, 117, 125, 118, 112, 114, 113, 117, 115, 113, 109, 111, 119, 123, 120, 110, 108, 106, 106, 102, 103, 101, 106, 100, 107, 102, 99, 101, 105, 98, 93, 93, 95, 101, 102, 100, 103, 102, 105, 103, 99, 104, 104, 103, 103, 103, 103, 101, 100, 100, 96, 96, 95, 107, 217, 249, 253, 252, 253, 253, 248, 253, 254, 255, 255, 255, 254, 255, 255, 255, 254, 253, 254, 254, 254, 254, 254, 254, 254, 254, 254, 254, 253, 249, 245, 234, 230, 171, 62, 24, 27, 21, 23, 25, 24, 22, 21, 20, 17, 16, 15, 15, 15, 15, 15, 15, 16, 15, 16, 20, 23, 26, 25, 25, 28, 76, 92, 101, 123, 132, 138, 118, 119, 126, 132, 134, 114, 73, 67, 67, 73, 83, 59, 89, 101, 120, 133, 128, 114, 66, 101, 100, 65, 70, 65, 56, 90, 111, 114, 126, 128, 117, 111, 88, 63, 113, 137, 137, 139, 146, 142, 145, 148, 116, 117, 28, 82, 135, 124, 133, 135, 138, 140, 146, 146, 140, 148, 124, 121, 111, 70, 14, 14, 13, 8, 12, 17, 14, 12, 14, 19, 44, 90, 132, 155, 148, 145, 153, 151, 149, 148, 148, 148, 147, 146, 147, 149, 148, 147, 147, 145, 145, 144, 145, 145, 145, 146, 146, 146, 147, 146, 146, 148, 145, 144, 141, 145, 141, 142, 140, 140, 140, 138, 138, 138, 139, 140, 140, 139, 139, 140, 140, 141, 142, 141, 147, 133, 124, 122, 108, 104, 110, 119, 120, 119, 123, 125, 126, 123, 123, 123, 120, 120, 117, 120, 117, 111, 109, 116, 116, 110, 108, 111, 105, 107, 105, 104, 102, 103, 108, 105, 102, 102, 103, 106, 103, 105, 102, 98, 97, 102, 104, 104, 101, 103, 104, 101, 103, 104, 103, 103, 103, 103, 103, 102, 101, 100, 98, 96, 109, 191, 249, 254, 255, 255, 251, 254, 253, 250, 254, 254, 254, 255, 255, 255, 254, 254, 253, 253, 253, 254, 254, 254, 254, 254, 253, 253, 251, 234, 227, 221, 207, 124, 35, 28, 23, 25, 19, 23, 21, 26, 21, 18, 16, 15, 15, 14, 16, 15, 15, 15, 15, 16, 16, 18, 23, 26, 26, 25, 25, 31, 68, 91, 113, 124, 132, 137, 126, 126, 127, 127, 131, 132, 81, 75, 74, 77, 94, 54, 88, 101, 137, 136, 143, 130, 74, 106, 110, 82, 60, 65, 55, 64, 90, 102, 113, 122, 115, 107, 74, 63, 117, 128, 130, 116, 143, 142, 146, 140, 137, 124, 72, 144, 146, 146, 150, 145, 138, 138, 164, 151, 145, 149, 136, 124, 105, 94, 16, 12, 12, 13, 14, 11, 11, 12, 12, 13, 16, 16, 19, 62, 122, 151, 154, 151, 153, 150, 148, 148, 149, 148, 146, 151, 150, 147, 151, 148, 147, 147, 146, 147, 146, 146, 145, 145, 147, 146, 148, 147, 142, 141, 137, 139, 134, 127, 134, 140, 138, 135, 135, 135, 136, 139, 142, 143, 141, 140, 140, 139, 140, 141, 147, 135, 134, 138, 125, 111, 104, 115, 117, 115, 121, 122, 124, 119, 121, 122, 112, 116, 112, 108, 109, 112, 117, 121, 116, 109, 111, 107, 104, 105, 106, 103, 98, 100, 109, 103, 103, 101, 104, 103, 102, 108, 105, 102, 97, 102, 107, 106, 107, 104, 104, 103, 103, 103, 104, 103, 103, 103, 104, 103, 102, 102, 100, 98, 108, 162, 251, 255, 255, 255, 254, 254, 254, 254, 254, 254, 254, 254, 254, 254, 253, 253, 253, 253, 254, 254, 255, 254, 253, 248, 235, 231, 220, 217, 202, 163, 72, 22, 28, 21, 21, 20, 21, 20, 20, 19, 20, 19, 17, 17, 17, 17, 18, 18, 16, 15, 16, 17, 20, 21, 23, 24, 27, 27, 27, 44, 107, 98, 117, 123, 121, 127, 148, 141, 129, 128, 139, 132, 90, 106, 89, 90, 100, 84, 90, 116, 111, 135, 139, 125, 94, 138, 120, 124, 95, 77, 62, 93, 88, 106, 99, 107, 119, 93, 71, 125, 132, 128, 142, 134, 145, 147, 146, 162, 159, 148, 148, 144, 155, 152, 149, 136, 148, 130, 156, 153, 151, 141, 132, 120, 102, 86, 19, 12, 17, 13, 13, 13, 13, 13, 13, 13, 14, 14, 14, 16, 15, 38, 95, 145, 160, 152, 155, 149, 140, 153, 160, 156, 152, 151, 153, 150, 150, 150, 149, 148, 146, 148, 148, 139, 146, 127, 126, 123, 114, 116, 105, 115, 119, 118, 123, 130, 120, 129, 128, 127, 132, 130, 136, 143, 146, 141, 140, 140, 140, 143, 146, 144, 146, 142, 128, 116, 110, 108, 112, 111, 110, 112, 116, 118, 118, 117, 116, 115, 114, 115, 116, 119, 122, 117, 109, 107, 111, 109, 108, 107, 105, 108, 108, 110, 117, 115, 110, 108, 106, 104, 104, 101, 100, 99, 97, 99, 100, 108, 109, 108, 108, 108, 107, 106, 105, 105, 105, 104, 105, 102, 104, 104, 102, 100, 99, 131, 253, 255, 255, 255, 254, 254, 254, 254, 254, 254, 254, 254, 254, 254, 255, 255, 255, 251, 251, 248, 245, 241, 232, 219, 210, 198, 182, 172, 116, 35, 22, 22, 17, 19, 20, 20, 19, 17, 17, 18, 16, 16, 15, 16, 16, 16, 15, 15, 15, 14, 16, 20, 21, 21, 23, 24, 26, 26, 26, 54, 101, 99, 100, 120, 128, 127, 162, 149, 130, 128, 132, 130, 91, 104, 87, 85, 108, 95, 88, 120, 114, 141, 145, 146, 88, 138, 139, 144, 136, 142, 106, 66, 69, 129, 93, 105, 116, 79, 94, 148, 137, 156, 169, 152, 146, 149, 151, 149, 150, 146, 143, 139, 138, 141, 121, 135, 139, 148, 153, 156, 150, 129, 128, 122, 86, 86, 21, 16, 15, 13, 13, 13, 13, 13, 13, 13, 13, 13, 13, 13, 16, 17, 15, 20, 66, 126, 161, 155, 149, 152, 157, 153, 153, 153, 152, 155, 153, 151, 150, 150, 148, 146, 138, 123, 126, 130, 130, 128, 122, 115, 109, 84, 87, 92, 111, 115, 125, 118, 117, 120, 138, 137, 132, 129, 143, 143, 144, 144, 144, 144, 144, 147, 144, 140, 138, 119, 114, 116, 112, 119, 120, 121, 122, 119, 124, 127, 128, 125, 122, 123, 123, 118, 114, 114, 111, 108, 112, 112, 112, 110, 112, 114, 119, 117, 117, 111, 113, 113, 112, 115, 113, 109, 109, 104, 105, 103, 100, 98, 101, 101, 104, 109, 108, 108, 106, 106, 106, 105, 104, 104, 104, 105, 102, 101, 90, 115, 244, 255, 255, 255, 254, 254, 254, 254, 254, 254, 254, 254, 255, 255, 255, 254, 253, 250, 248, 237, 227, 214, 199, 185, 162, 148, 135, 75, 25, 22, 19, 17, 20, 19, 19, 18, 16, 15, 14, 15, 15, 15, 15, 15, 15, 15, 14, 15, 16, 19, 19, 19, 20, 21, 23, 23, 25, 25, 25, 83, 109, 107, 106, 133, 140, 108, 158, 156, 129, 129, 121, 126, 93, 84, 78, 68, 97, 98, 93, 122, 123, 139, 146, 152, 143, 140, 146, 148, 145, 137, 137, 109, 116, 55, 45, 146, 155, 132, 141, 137, 150, 153, 150, 156, 143, 147, 160, 147, 158, 157, 144, 135, 135, 139, 134, 146, 151, 144, 115, 143, 138, 130, 126, 125, 100, 91, 21, 16, 18, 13, 13, 13, 13, 13, 13, 13, 12, 12, 12, 16, 18, 17, 13, 12, 17, 25, 38, 89, 144, 160, 155, 151, 154, 154, 154, 156, 153, 152, 151, 152, 149, 139, 125, 117, 120, 117, 115, 125, 107, 103, 107, 66, 66, 76, 65, 103, 104, 108, 115, 127, 142, 136, 131, 131, 131, 141, 145, 148, 145, 142, 141, 145, 141, 142, 142, 130, 117, 114, 114, 122, 124, 120, 114, 117, 119, 119, 116, 116, 117, 119, 119, 118, 114, 114, 113, 111, 111, 111, 111, 110, 111, 109, 111, 112, 115, 118, 117, 114, 115, 118, 119, 117, 117, 113, 113, 112, 117, 112, 108, 108, 109, 109, 108, 107, 106, 107, 107, 106, 103, 105, 104, 105, 103, 102, 80, 111, 227, 253, 255, 255, 253, 253, 253, 253, 253, 253, 253, 255, 255, 255, 252, 247, 243, 229, 224, 208, 187, 166, 149, 139, 136, 124, 37, 20, 20, 19, 17, 15, 19, 22, 19, 16, 15, 13, 13, 14, 16, 16, 16, 15, 15, 15, 15, 16, 17, 19, 20, 21, 21, 21, 23, 23, 25, 25, 25, 98, 109, 109, 106, 138, 142, 133, 146, 157, 134, 131, 114, 116, 83, 60, 63, 64, 108, 102, 91, 122, 135, 139, 148, 150, 160, 153, 159, 151, 154, 154, 150, 145, 135, 133, 62, 141, 144, 139, 144, 141, 167, 157, 167, 158, 156, 155, 173, 159, 156, 156, 154, 141, 150, 141, 147, 145, 149, 129, 120, 136, 136, 130, 126, 122, 107, 87, 30, 18, 21, 13, 13, 13, 13, 13, 13, 13, 12, 12, 12, 12, 13, 13, 10, 14, 13, 12, 12, 15, 15, 29, 62, 133, 160, 154, 153, 157, 154, 153, 152, 152, 153, 150, 129, 126, 126, 117, 77, 102, 104, 50, 85, 110, 103, 99, 98, 25, 90, 89, 91, 99, 114, 130, 138, 132, 124, 118, 138, 142, 145, 143, 145, 143, 145, 143, 145, 140, 139, 126, 114, 117, 118, 123, 126, 125, 119, 121, 121, 122, 122, 121, 120, 117, 116, 117, 115, 113, 114, 111, 109, 107, 114, 119, 120, 122, 119, 115, 117, 113, 113, 119, 119, 117, 116, 116, 117, 114, 117, 114, 115, 112, 109, 109, 107, 106, 105, 106, 107, 107, 107, 103, 106, 104, 106, 104, 102, 84, 105, 199, 250, 254, 251, 254, 254, 253, 251, 252, 252, 253, 249, 249, 243, 236, 220, 207, 189, 164, 152, 141, 128, 133, 129, 88, 24, 28, 20, 17, 18, 17, 17, 18, 16, 16, 16, 16, 16, 14, 14, 14, 14, 15, 14, 14, 13, 16, 17, 18, 21, 22, 23, 23, 23, 23, 23, 22, 23, 24, 47, 109, 103, 107, 120, 133, 136, 141, 141, 134, 129, 117, 80, 61, 79, 68, 55, 123, 126, 107, 133, 149, 148, 150, 152, 157, 156, 158, 154, 152, 150, 149, 151, 141, 154, 138, 149, 142, 127, 148, 147, 157, 159, 164, 158, 158, 152, 173, 170, 160, 160, 137, 133, 138, 145, 148, 148, 152, 142, 130, 142, 135, 128, 123, 114, 113, 91, 58, 14, 14, 13, 13, 13, 13, 13, 13, 13, 13, 13, 13, 11, 11, 13, 10, 12, 20, 19, 14, 9, 16, 14, 32, 43, 76, 98, 145, 152, 153, 155, 155, 160, 151, 126, 90, 122, 132, 121, 63, 108, 100, 99, 82, 90, 90, 95, 93, 60, 74, 90, 100, 105, 91, 95, 113, 122, 124, 120, 139, 138, 144, 150, 148, 144, 147, 147, 151, 145, 144, 138, 125, 117, 116, 121, 124, 129, 126, 132, 132, 132, 131, 128, 126, 131, 123, 118, 117, 116, 115, 113, 115, 118, 119, 119, 118, 123, 118, 118, 119, 114, 114, 118, 119, 119, 119, 118, 118, 120, 117, 116, 117, 117, 114, 115, 111, 110, 109, 107, 110, 105, 108, 105, 104, 106, 106, 106, 106, 79, 94, 145, 250, 252, 253, 254, 250, 244, 243, 241, 239, 241, 235, 227, 209, 193, 169, 151, 138, 131, 131, 127, 131, 129, 49, 17, 22, 14, 16, 16, 17, 18, 16, 14, 15, 14, 14, 15, 14, 15, 16, 14, 14, 14, 13, 13, 13, 17, 17, 18, 21, 21, 22, 22, 22, 22, 22, 22, 23, 24, 22, 100, 104, 103, 82, 113, 130, 123, 132, 122, 115, 81, 69, 80, 72, 87, 100, 137, 141, 145, 145, 154, 158, 149, 156, 156, 152, 156, 156, 153, 151, 152, 156, 155, 156, 152, 148, 143, 138, 129, 170, 157, 163, 162, 165, 161, 136, 169, 170, 157, 167, 148, 137, 140, 143, 145, 147, 149, 145, 141, 133, 126, 125, 118, 97, 110, 102, 83, 59, 17, 13, 13, 13, 13, 13, 13, 13, 13, 13, 13, 14, 13, 10, 8, 9, 112, 70, 30, 49, 78, 76, 118, 123, 119, 108, 110, 118, 122, 146, 137, 141, 154, 103, 64, 109, 130, 118, 49, 119, 102, 95, 70, 58, 53, 57, 49, 50, 51, 71, 100, 100, 91, 120, 109, 112, 112, 119, 139, 144, 145, 145, 149, 146, 146, 145, 147, 145, 144, 143, 130, 119, 116, 120, 125, 126, 127, 126, 129, 132, 131, 130, 127, 129, 128, 129, 126, 124, 122, 124, 126, 124, 123, 123, 122, 123, 121, 120, 118, 119, 117, 118, 119, 119, 118, 118, 119, 117, 119, 117, 116, 117, 115, 115, 112, 111, 110, 108, 109, 105, 107, 105, 105, 106, 106, 106, 106, 79, 86, 105, 251, 250, 253, 245, 237, 230, 228, 228, 224, 215, 202, 180, 157, 136, 132, 132, 129, 128, 123, 130, 95, 25, 17, 18, 14, 16, 17, 19, 19, 17, 15, 14, 15, 15, 14, 13, 18, 18, 13, 14, 14, 15, 12, 13, 15, 17, 18, 19, 20, 21, 21, 22, 22, 22, 22, 22, 23, 24, 38, 111, 106, 118, 102, 95, 116, 115, 97, 93, 92, 72, 70, 52, 93, 135, 138, 143, 152, 149, 152, 155, 158, 144, 142, 161, 153, 155, 154, 150, 149, 150, 154, 156, 158, 145, 139, 142, 139, 126, 159, 161, 169, 163, 163, 159, 131, 160, 176, 167, 159, 158, 157, 132, 141, 137, 147, 141, 143, 140, 123, 119, 119, 119, 105, 115, 108, 92, 109, 22, 13, 13, 13, 13, 13, 13, 13, 13, 13, 13, 11, 13, 13, 5, 77, 118, 123, 123, 127, 114, 114, 102, 90, 79, 81, 55, 116, 120, 118, 125, 144, 127, 88, 103, 124, 112, 90, 105, 99, 88, 64, 71, 50, 46, 54, 53, 63, 51, 63, 76, 103, 129, 123, 114, 120, 118, 141, 141, 144, 144, 148, 146, 144, 144, 142, 144, 144, 146, 137, 126, 116, 119, 123, 124, 127, 128, 125, 129, 131, 133, 133, 129, 130, 129, 129, 129, 129, 126, 125, 128, 123, 123, 121, 123, 123, 122, 119, 122, 119, 118, 118, 119, 119, 118, 120, 117, 120, 119, 116, 117, 117, 115, 113, 113, 112, 111, 108, 109, 107, 106, 107, 106, 106, 106, 106, 78, 81, 96, 236, 251, 234, 217, 211, 202, 195, 189, 178, 167, 146, 130, 123, 125, 124, 122, 133, 128, 121, 59, 7, 19, 16, 13, 13, 10, 18, 17, 18, 15, 14, 14, 16, 17, 17, 17, 18, 16, 14, 15, 13, 14, 14, 13, 16, 17, 18, 19, 20, 19, 20, 21, 21, 21, 21, 21, 23, 23, 24, 33, 113, 115, 129, 124, 116, 120, 95, 91, 81, 63, 77, 84, 59, 135, 132, 143, 146, 144, 159, 159, 152, 158, 142, 121, 155, 154, 155, 149, 143, 143, 146, 151, 155, 159, 150, 150, 137, 133, 148, 143, 159, 157, 161, 161, 151, 143, 156, 161, 165, 163, 155, 152, 138, 135, 133, 140, 134, 135, 136, 141, 137, 133, 129, 119, 110, 125, 94, 112, 67, 13, 13, 13, 13, 13, 13, 13, 13, 13, 13, 14, 11, 15, 67, 110, 115, 113, 100, 102, 93, 67, 42, 104, 115, 112, 28, 51, 65, 117, 123, 132, 127, 110, 134, 127, 124, 121, 99, 98, 78, 68, 56, 64, 65, 73, 58, 62, 54, 55, 59, 101, 129, 100, 87, 112, 117, 136, 139, 141, 145, 145, 144, 143, 145, 144, 149, 150, 151, 149, 139, 121, 117, 120, 125, 128, 128, 128, 128, 131, 136, 133, 130, 133, 130, 130, 129, 128, 126, 125, 125, 124, 124, 122, 123, 125, 123, 122, 122, 121, 119, 119, 119, 120, 120, 120, 122, 119, 120, 118, 117, 118, 115, 115, 114, 113, 114, 110, 113, 108, 107, 108, 106, 106, 106, 106, 72, 76, 88, 199, 222, 195, 176, 169, 158, 151, 139, 132, 135, 125, 123, 118, 121, 129, 134, 118, 105, 22, 18, 16, 15, 13, 10, 14, 18, 19, 20, 15, 16, 18, 15, 13, 10, 6, 15, 26, 53, 21, 16, 6, 11, 11, 13, 13, 15, 17, 18, 19, 20, 19, 20, 21, 22, 22, 22, 23, 28, 20, 18, 34, 115, 133, 143, 140, 133, 129, 128, 100, 92, 26, 112, 118, 109, 144, 138, 135, 144, 136, 150, 155, 154, 159, 152, 128, 149, 160, 152, 139, 147, 145, 147, 152, 156, 158, 181, 150, 114, 52, 148, 138, 167, 152, 157, 166, 148, 150, 155, 153, 156, 163, 168, 149, 141, 135, 130, 140, 111, 118, 138, 140, 139, 140, 132, 130, 111, 104, 93, 118, 35, 13, 5, 13, 10, 16, 14, 13, 10, 34, 17, 17, 6, 11, 3, 80, 118, 132, 106, 26, 65, 29, 37, 28, 63, 113, 115, 125, 97, 13, 9, 34, 72, 116, 121, 142, 148, 135, 122, 130, 104, 79, 72, 75, 85, 72, 78, 47, 50, 40, 54, 57, 45, 79, 104, 78, 94, 105, 108, 115, 143, 140, 140, 142, 142, 148, 152, 156, 152, 156, 155, 154, 146, 136, 119, 116, 119, 120, 131, 129, 127, 132, 138, 135, 133, 137, 131, 130, 129, 129, 128, 127, 130, 126, 127, 127, 123, 126, 125, 127, 126, 126, 122, 122, 122, 122, 121, 121, 121, 120, 119, 120, 119, 120, 121, 117, 116, 115, 116, 113, 110, 110, 110, 110, 111, 107, 107, 107, 70, 75, 84, 130, 177, 148, 140, 140, 135, 126, 127, 125, 121, 118, 120, 123, 120, 128, 127, 66, 14, 19, 14, 11, 11, 14, 15, 14, 13, 9, 9, 13, 10, 14, 16, 31, 39, 46, 54, 67, 37, 8, 12, 11, 11, 12, 13, 15, 16, 18, 18, 19, 19, 19, 20, 22, 22, 22, 23, 24, 23, 17, 101, 121, 130, 141, 150, 138, 126, 126, 110, 112, 112, 129, 132, 93, 145, 148, 132, 167, 156, 140, 138, 156, 156, 155, 119, 142, 146, 156, 154, 147, 143, 147, 144, 149, 152, 164, 158, 142, 131, 153, 150, 163, 168, 169, 158, 155, 149, 138, 162, 161, 162, 157, 155, 85, 141, 117, 127, 121, 135, 140, 140, 140, 134, 132, 136, 121, 113, 119, 78, 25, 15, 1, 46, 103, 119, 122, 138, 95, 103, 56, 7, 12, 9, 112, 118, 103, 47, 59, 46, 44, 55, 70, 122, 133, 126, 122, 74, 26, 38, 14, 101, 121, 145, 156, 130, 116, 127, 110, 103, 82, 70, 76, 90, 97, 74, 68, 62, 60, 55, 71, 57, 68, 88, 103, 122, 102, 106, 135, 141, 145, 143, 142, 150, 152, 153, 158, 158, 159, 155, 148, 147, 132, 116, 124, 126, 125, 130, 133, 135, 136, 136, 138, 134, 132, 132, 131, 130, 129, 129, 131, 129, 127, 126, 124, 127, 126, 126, 125, 124, 124, 124, 122, 121, 121, 121, 121, 121, 120, 121, 119, 119, 118, 117, 117, 116, 113, 113, 113, 112, 112, 110, 107, 107, 107, 107, 67, 72, 79, 94, 136, 132, 132, 128, 123, 123, 124, 123, 124, 120, 119, 121, 126, 106, 38, 18, 20, 16, 13, 17, 14, 13, 7, 9, 11, 18, 34, 55, 42, 40, 32, 34, 37, 38, 50, 47, 8, 14, 11, 12, 12, 12, 14, 16, 17, 18, 19, 18, 19, 19, 21, 21, 21, 23, 23, 23, 16, 129, 118, 133, 135, 146, 146, 127, 124, 115, 104, 129, 127, 141, 147, 145, 153, 149, 165, 156, 150, 115, 158, 149, 148, 119, 157, 144, 154, 150, 148, 151, 140, 138, 138, 138, 148, 152, 142, 151, 155, 149, 164, 168, 170, 169, 159, 144, 146, 161, 163, 158, 164, 168, 138, 150, 142, 145, 130, 138, 132, 134, 143, 132, 134, 136, 127, 110, 106, 27, 22, 57, 93, 134, 132, 121, 128, 121, 116, 119, 120, 44, 12, 11, 111, 113, 93, 55, 55, 52, 39, 44, 63, 100, 133, 124, 113, 92, 96, 93, 29, 70, 105, 128, 144, 126, 109, 122, 131, 144, 120, 122, 105, 116, 118, 94, 98, 91, 88, 106, 111, 103, 114, 116, 115, 127, 109, 104, 120, 142, 145, 148, 143, 151, 153, 158, 157, 159, 159, 159, 156, 151, 145, 126, 119, 123, 128, 132, 138, 137, 135, 137, 140, 134, 135, 134, 133, 132, 131, 132, 131, 132, 129, 127, 128, 127, 127, 126, 125, 124, 126, 125, 123, 122, 122, 122, 122, 121, 120, 122, 120, 119, 118, 118, 117, 117, 113, 113, 114, 112, 111, 111, 110, 108, 108, 108, 64, 70, 74, 87, 123, 132, 125, 120, 118, 121, 123, 122, 121, 130, 127, 127, 76, 21, 15, 16, 13, 10, 17, 9, 13, 9, 17, 28, 51, 61, 64, 64, 50, 30, 24, 38, 46, 54, 61, 70, 41, 3, 13, 12, 12, 13, 11, 13, 14, 15, 16, 17, 17, 18, 19, 20, 20, 20, 21, 24, 21, 17, 38, 68, 121, 124, 126, 130, 124, 127, 130, 128, 124, 112, 142, 144, 145, 156, 151, 151, 151, 151, 144, 154, 143, 142, 130, 157, 136, 153, 148, 147, 156, 139, 136, 137, 143, 146, 150, 134, 146, 152, 148, 146, 162, 167, 161, 160, 144, 106, 133, 157, 161, 156, 154, 153, 154, 150, 143, 130, 130, 135, 140, 145, 137, 137, 135, 126, 99, 100, 15, 73, 110, 114, 116, 105, 104, 88, 88, 100, 111, 116, 99, 32, 33, 114, 108, 114, 98, 72, 69, 65, 70, 93, 87, 107, 114, 114, 73, 76, 96, 108, 99, 50, 92, 115, 133, 111, 114, 138, 141, 138, 138, 137, 134, 126, 127, 120, 121, 124, 125, 133, 128, 133, 129, 119, 121, 117, 103, 121, 134, 144, 145, 145, 149, 154, 158, 156, 157, 158, 160, 159, 155, 150, 137, 122, 119, 126, 131, 134, 135, 137, 139, 139, 138, 137, 136, 135, 134, 133, 133, 131, 131, 131, 129, 130, 127, 128, 128, 127, 126, 126, 126, 125, 124, 123, 123, 123, 122, 121, 122, 121, 121, 121, 119, 118, 117, 117, 113, 112, 114, 112, 112, 112, 109, 109, 109, 65, 69, 70, 79, 122, 121, 119, 123, 122, 126, 130, 131, 125, 128, 114, 47, 17, 17, 11, 11, 12, 5, 6, 13, 10, 35, 62, 73, 72, 62, 44, 29, 27, 34, 45, 60, 74, 74, 68, 60, 46, 7, 6, 13, 10, 11, 11, 13, 10, 12, 14, 15, 14, 17, 18, 18, 19, 19, 19, 19, 20, 22, 19, 18, 18, 38, 109, 115, 124, 136, 138, 128, 131, 138, 130, 103, 136, 144, 142, 151, 153, 148, 143, 155, 153, 155, 148, 145, 140, 149, 142, 154, 151, 152, 157, 149, 147, 143, 147, 149, 149, 144, 144, 147, 165, 161, 171, 167, 150, 160, 145, 106, 112, 149, 159, 150, 156, 153, 151, 148, 148, 144, 138, 145, 143, 144, 138, 134, 132, 123, 101, 107, 69, 101, 127, 127, 90, 68, 97, 70, 56, 68, 91, 113, 111, 102, 32, 102, 105, 130, 117, 98, 78, 84, 96, 92, 75, 72, 74, 78, 42, 44, 65, 109, 136, 69, 28, 68, 127, 127, 119, 129, 138, 143, 151, 137, 129, 133, 129, 130, 127, 119, 132, 137, 139, 141, 140, 123, 112, 114, 103, 134, 131, 130, 140, 144, 151, 150, 155, 157, 156, 158, 159, 162, 162, 154, 146, 134, 122, 121, 127, 130, 136, 138, 140, 139, 141, 138, 140, 140, 137, 136, 136, 134, 132, 132, 132, 133, 130, 129, 127, 130, 129, 126, 126, 126, 126, 125, 124, 123, 121, 121, 121, 123, 122, 122, 119, 118, 117, 119, 114, 113, 116, 114, 111, 110, 111, 110, 109, 64, 66, 69, 76, 116, 116, 121, 123, 121, 128, 125, 132, 125, 91, 31, 19, 16, 9, 6, 13, 10, 16, 21, 24, 30, 52, 60, 51, 40, 34, 30, 35, 40, 50, 54, 57, 47, 42, 36, 43, 44, 4, 6, 13, 10, 13, 10, 13, 10, 13, 10, 11, 13, 15, 13, 16, 19, 19, 19, 19, 19, 19, 19, 20, 19, 19, 22, 16, 61, 101, 119, 135, 133, 135, 134, 132, 137, 108, 97, 144, 148, 145, 150, 148, 146, 159, 154, 151, 149, 143, 128, 148, 155, 164, 159, 161, 161, 160, 149, 146, 145, 143, 144, 149, 140, 145, 161, 162, 163, 157, 146, 158, 128, 92, 89, 153, 156, 154, 156, 150, 146, 131, 138, 146, 134, 133, 135, 144, 134, 137, 110, 111, 119, 112, 95, 111, 105, 125, 83, 69, 83, 52, 52, 68, 91, 119, 120, 132, 80, 89, 104, 122, 128, 114, 85, 69, 80, 72, 68, 73, 71, 61, 63, 61, 58, 73, 91, 89, 14, 58, 113, 126, 127, 97, 155, 144, 144, 135, 140, 143, 142, 139, 137, 136, 131, 140, 142, 143, 131, 124, 107, 119, 122, 140, 132, 136, 142, 137, 144, 153, 156, 157, 156, 162, 163, 162, 159, 158, 152, 143, 126, 119, 124, 129, 137, 137, 139, 139, 139, 140, 142, 142, 140, 139, 137, 135, 132, 132, 132, 133, 133, 131, 128, 131, 129, 127, 127, 127, 126, 126, 126, 124, 122, 121, 121, 123, 121, 120, 119, 119, 118, 117, 116, 115, 115, 114, 113, 111, 112, 111, 110, 62, 61, 64, 71, 110, 115, 119, 121, 124, 125, 131, 124, 62, 19, 16, 14, 13, 13, 10, 26, 38, 40, 40, 37, 32, 29, 24, 28, 31, 37, 36, 37, 40, 38, 41, 41, 46, 40, 40, 42, 39, 11, 9, 13, 10, 11, 11, 9, 13, 10, 11, 14, 13, 15, 18, 18, 18, 19, 19, 19, 19, 20, 20, 19, 19, 24, 28, 88, 121, 139, 134, 134, 134, 145, 136, 131, 106, 120, 146, 149, 144, 150, 154, 150, 153, 144, 149, 154, 139, 147, 151, 157, 153, 154, 153, 154, 148, 147, 142, 150, 155, 158, 166, 169, 166, 159, 157, 157, 152, 162, 126, 41, 46, 132, 147, 150, 148, 144, 146, 122, 125, 135, 131, 124, 127, 138, 145, 104, 75, 125, 95, 107, 93, 86, 99, 124, 93, 73, 61, 48, 53, 73, 102, 121, 137, 135, 118, 50, 113, 134, 134, 128, 111, 89, 71, 67, 91, 96, 98, 82, 84, 90, 98, 81, 76, 72, 74, 108, 131, 146, 142, 122, 131, 127, 134, 139, 151, 144, 139, 144, 125, 129, 139, 126, 130, 132, 128, 123, 98, 107, 117, 135, 130, 139, 139, 137, 124, 151, 157, 158, 157, 161, 162, 163, 162, 163, 156, 150, 134, 121, 124, 126, 135, 137, 138, 138, 138, 140, 141, 141, 141, 139, 137, 136, 134, 133, 133, 131, 133, 132, 129, 130, 129, 128, 128, 128, 127, 127, 126, 124, 125, 123, 120, 121, 120, 119, 120, 119, 118, 117, 118, 117, 114, 115, 114, 112, 113, 112, 111, 60, 60, 59, 84, 108, 113, 117, 122, 129, 127, 106, 33, 15, 17, 20, 18, 12, 8, 35, 32, 31, 27, 29, 25, 27, 25, 25, 31, 30, 33, 33, 38, 43, 46, 49, 52, 51, 54, 43, 46, 27, 8, 13, 10, 11, 13, 10, 9, 9, 13, 10, 13, 14, 15, 17, 17, 17, 18, 19, 19, 19, 19, 20, 20, 17, 21, 17, 49, 99, 123, 129, 138, 136, 138, 138, 139, 116, 90, 130, 145, 146, 151, 149, 125, 149, 145, 145, 148, 150, 139, 136, 149, 160, 158, 157, 155, 147, 146, 146, 147, 147, 150, 156, 166, 163, 165, 153, 159, 167, 165, 139, 20, 23, 73, 121, 136, 146, 130, 126, 126, 118, 119, 121, 121, 91, 103, 120, 100, 119, 131, 104, 108, 122, 89, 102, 144, 83, 71, 72, 69, 49, 78, 111, 116, 134, 148, 120, 31, 98, 131, 142, 142, 132, 132, 111, 83, 92, 84, 92, 122, 94, 111, 101, 99, 117, 102, 115, 130, 142, 147, 159, 138, 131, 124, 145, 140, 145, 126, 120, 126, 118, 91, 124, 117, 105, 61, 119, 144, 139, 127, 117, 131, 126, 128, 121, 118, 117, 151, 156, 157, 156, 162, 164, 161, 161, 165, 159, 155, 143, 129, 124, 124, 134, 136, 139, 139, 139, 141, 141, 141, 142, 140, 138, 137, 137, 135, 134, 132, 133, 131, 131, 129, 128, 128, 129, 129, 128, 128, 127, 125, 125, 124, 123, 121, 121, 120, 121, 120, 119, 118, 118, 117, 116, 115, 115, 114, 113, 112, 112, 54, 60, 62, 104, 104, 109, 120, 125, 128, 95, 19, 27, 25, 25, 11, 16, 13, 6, 36, 31, 30, 26, 22, 23, 29, 27, 29, 29, 31, 35, 44, 45, 48, 51, 53, 56, 67, 79, 48, 56, 40, 5, 13, 10, 13, 10, 13, 10, 8, 9, 9, 14, 15, 15, 16, 17, 17, 18, 19, 19, 19, 19, 20, 21, 23, 15, 22, 24, 83, 113, 130, 125, 138, 140, 139, 131, 122, 121, 149, 147, 148, 148, 136, 125, 155, 146, 150, 136, 154, 150, 128, 137, 157, 158, 158, 151, 145, 145, 150, 148, 147, 153, 151, 167, 166, 161, 166, 169, 162, 157, 139, 62, 16, 11, 68, 82, 111, 64, 38, 44, 19, 28, 23, 35, 25, 70, 117, 121, 121, 145, 153, 151, 132, 98, 128, 160, 67, 92, 98, 81, 82, 83, 116, 135, 113, 129, 128, 93, 79, 121, 130, 150, 145, 146, 134, 115, 118, 128, 135, 156, 136, 155, 144, 132, 157, 143, 141, 150, 141, 146, 153, 163, 148, 116, 138, 137, 112, 90, 78, 99, 94, 75, 131, 118, 109, 26, 110, 137, 152, 148, 137, 134, 124, 112, 116, 119, 132, 139, 153, 155, 155, 158, 160, 164, 166, 165, 159, 157, 149, 136, 125, 123, 133, 136, 140, 140, 140, 142, 140, 140, 142, 140, 139, 137, 138, 136, 134, 134, 133, 129, 132, 129, 127, 128, 129, 129, 128, 128, 128, 125, 125, 125, 126, 122, 122, 122, 121, 120, 119, 120, 118, 117, 118, 115, 115, 115, 114, 113, 112, 58, 49, 80, 102, 107, 103, 80, 66, 58, 19, 21, 17, 12, 12, 11, 13, 17, 4, 26, 27, 26, 26, 28, 28, 29, 33, 40, 37, 36, 52, 57, 47, 54, 50, 47, 46, 44, 45, 46, 49, 35, 18, 22, 28, 31, 24, 36, 48, 64, 60, 21, 6, 16, 17, 18, 15, 18, 21, 21, 21, 20, 18, 16, 16, 22, 60, 98, 118, 114, 128, 139, 126, 108, 112, 139, 151, 150, 146, 154, 143, 164, 156, 158, 152, 134, 155, 124, 118, 143, 157, 156, 156, 142, 85, 135, 144, 144, 143, 147, 147, 166, 168, 169, 164, 162, 156, 156, 136, 112, 16, 20, 27, 28, 22, 23, 29, 30, 29, 28, 31, 31, 89, 120, 120, 122, 116, 115, 149, 161, 152, 110, 130, 153, 99, 91, 113, 114, 101, 75, 100, 113, 125, 140, 138, 90, 70, 90, 132, 149, 154, 147, 142, 137, 137, 121, 123, 125, 142, 146, 144, 140, 136, 138, 144, 166, 151, 142, 142, 150, 140, 109, 144, 135, 115, 95, 99, 116, 125, 106, 88, 117, 117, 63, 89, 112, 144, 152, 149, 129, 125, 130, 119, 123, 128, 136, 135, 160, 160, 158, 159, 162, 164, 167, 160, 159, 155, 145, 132, 126, 129, 135, 138, 139, 142, 140, 141, 141, 141, 140, 140, 141, 138, 137, 136, 135, 134, 130, 132, 131, 131, 128, 129, 129, 127, 128, 128, 128, 125, 126, 125, 124, 124, 123, 122, 122, 122, 122, 119, 119, 121, 118, 118, 118, 116, 114, 112, 52, 61, 79, 66, 44, 30, 27, 26, 32, 19, 11, 9, 5, 9, 8, 13, 10, 14, 5, 20, 35, 43, 47, 46, 44, 43, 42, 42, 43, 47, 53, 44, 43, 43, 42, 41, 36, 30, 32, 31, 33, 31, 30, 37, 33, 29, 27, 30, 42, 60, 78, 65, 28, 11, 16, 17, 15, 17, 20, 20, 20, 21, 19, 18, 18, 21, 31, 87, 106, 113, 128, 142, 132, 102, 77, 133, 130, 142, 150, 146, 154, 154, 154, 154, 157, 136, 152, 124, 90, 135, 149, 147, 160, 128, 61, 122, 133, 131, 132, 151, 156, 170, 160, 162, 163, 165, 142, 138, 137, 58, 21, 20, 28, 25, 27, 29, 33, 30, 28, 27, 32, 28, 130, 127, 137, 115, 123, 101, 112, 151, 141, 128, 144, 141, 106, 80, 87, 117, 98, 102, 83, 119, 139, 150, 149, 121, 98, 68, 125, 149, 153, 151, 150, 147, 145, 138, 127, 122, 130, 133, 144, 143, 143, 153, 152, 150, 151, 144, 137, 142, 126, 100, 132, 148, 141, 118, 119, 125, 146, 119, 58, 95, 92, 89, 72, 77, 117, 126, 91, 121, 95, 61, 124, 115, 119, 127, 115, 156, 159, 158, 159, 163, 166, 165, 164, 164, 161, 154, 142, 133, 129, 136, 139, 144, 140, 139, 140, 142, 143, 139, 138, 141, 138, 138, 137, 137, 132, 132, 133, 132, 131, 128, 128, 128, 127, 127, 127, 127, 126, 128, 129, 127, 127, 125, 123, 123, 123, 120, 121, 121, 119, 117, 117, 117, 117, 115, 114, 40, 51, 38, 26, 25, 24, 30, 28, 35, 9, 7, 7, 5, 9, 8, 9, 13, 6, 22, 47, 43, 35, 36, 40, 44, 47, 48, 43, 47, 44, 46, 36, 40, 34, 35, 33, 27, 28, 29, 29, 26, 22, 21, 20, 20, 26, 29, 39, 54, 57, 55, 62, 14, 14, 14, 13, 15, 17, 17, 18, 19, 20, 20, 20, 17, 11, 66, 119, 123, 134, 142, 145, 154, 126, 130, 62, 135, 141, 129, 148, 144, 148, 154, 142, 145, 131, 94, 76, 67, 154, 141, 158, 122, 51, 54, 108, 136, 112, 144, 147, 148, 153, 163, 162, 163, 155, 140, 106, 28, 22, 22, 28, 33, 31, 32, 37, 33, 32, 34, 31, 38, 136, 128, 125, 136, 146, 140, 110, 93, 90, 94, 143, 137, 79, 67, 73, 80, 82, 96, 103, 140, 151, 155, 158, 143, 110, 66, 124, 142, 143, 138, 136, 149, 143, 151, 137, 134, 144, 142, 148, 152, 139, 147, 146, 148, 148, 146, 142, 135, 117, 82, 128, 149, 142, 144, 133, 125, 146, 119, 84, 66, 72, 66, 60, 64, 68, 99, 87, 72, 60, 43, 101, 115, 117, 128, 138, 159, 157, 157, 160, 161, 159, 161, 166, 165, 161, 158, 150, 134, 129, 136, 138, 143, 142, 140, 140, 142, 142, 141, 143, 139, 139, 138, 138, 137, 133, 133, 133, 133, 132, 130, 129, 129, 129, 128, 128, 128, 129, 128, 127, 128, 129, 126, 124, 124, 124, 121, 122, 122, 119, 118, 118, 118, 118, 117, 115, 29, 32, 29, 29, 22, 19, 26, 35, 32, 14, 7, 9, 7, 13, 13, 10, 12, 13, 12, 18, 31, 28, 27, 29, 34, 41, 44, 48, 48, 56, 47, 43, 35, 34, 39, 33, 30, 28, 28, 27, 31, 33, 31, 27, 25, 25, 29, 33, 36, 43, 57, 55, 58, 42, 9, 11, 11, 12, 14, 13, 14, 16, 17, 17, 17, 11, 15, 38, 96, 127, 125, 116, 143, 143, 142, 118, 109, 114, 132, 142, 142, 124, 126, 142, 127, 132, 63, 42, 34, 19, 90, 127, 155, 147, 143, 90, 50, 128, 101, 58, 77, 136, 146, 155, 157, 146, 146, 105, 26, 23, 23, 30, 31, 47, 33, 34, 35, 31, 33, 32, 32, 86, 135, 133, 139, 123, 159, 161, 131, 107, 73, 71, 84, 75, 70, 77, 66, 79, 93, 122, 144, 160, 162, 165, 158, 150, 131, 74, 124, 134, 143, 144, 126, 115, 139, 142, 119, 112, 117, 121, 138, 137, 121, 122, 133, 137, 142, 147, 149, 127, 121, 88, 133, 129, 146, 150, 137, 141, 139, 129, 109, 80, 65, 61, 53, 50, 54, 55, 52, 55, 55, 52, 79, 114, 114, 129, 113, 149, 154, 155, 156, 160, 163, 160, 166, 164, 162, 160, 156, 144, 134, 132, 137, 139, 146, 142, 141, 141, 141, 142, 142, 143, 140, 139, 138, 137, 136, 133, 134, 133, 132, 132, 130, 130, 132, 129, 129, 129, 126, 128, 128, 128, 129, 127, 124, 124, 124, 122, 122, 122, 121, 120, 120, 120, 120, 118, 116, 25, 26, 29, 30, 28, 40, 39, 35, 31, 23, 12, 11, 9, 15, 9, 13, 10, 20, 9, 11, 31, 34, 45, 42, 55, 42, 43, 49, 44, 25, 13, 10, 24, 26, 30, 30, 25, 26, 24, 21, 29, 29, 32, 27, 27, 30, 27, 33, 35, 40, 50, 75, 63, 74, 71, 9, 13, 10, 9, 11, 11, 9, 13, 10, 11, 12, 11, 12, 15, 16, 21, 31, 79, 136, 118, 144, 127, 125, 119, 61, 107, 133, 131, 135, 45, 34, 108, 53, 95, 18, 26, 30, 21, 24, 132, 129, 140, 135, 135, 35, 36, 87, 15, 14, 109, 113, 102, 80, 36, 119, 70, 32, 23, 25, 32, 35, 39, 35, 37, 31, 29, 32, 31, 28, 111, 127, 133, 139, 135, 126, 153, 132, 96, 58, 72, 66, 64, 63, 113, 101, 106, 127, 149, 155, 163, 168, 168, 160, 150, 137, 77, 123, 122, 145, 147, 136, 96, 119, 103, 61, 61, 66, 65, 84, 55, 80, 74, 113, 116, 136, 146, 156, 140, 142, 151, 158, 128, 143, 154, 154, 147, 140, 136, 120, 106, 41, 51, 57, 56, 51, 49, 47, 49, 57, 59, 43, 116, 123, 117, 81, 122, 124, 144, 155, 161, 161, 162, 163, 163, 165, 166, 159, 151, 140, 136, 134, 139, 140, 141, 143, 144, 144, 141, 141, 143, 146, 143, 138, 140, 140, 136, 134, 134, 134, 131, 129, 129, 127, 129, 132, 116, 104, 112, 130, 130, 129, 128, 119, 125, 123, 120, 125, 121, 122, 120, 123, 122, 119, 118, 118, 27, 26, 25, 31, 35, 36, 29, 33, 43, 24, 9, 14, 13, 13, 11, 13, 10, 16, 13, 13, 34, 47, 40, 47, 39, 23, 14, 8, 7, 13, 10, 8, 21, 30, 33, 30, 24, 27, 19, 27, 23, 27, 28, 22, 26, 30, 34, 39, 42, 46, 60, 74, 65, 74, 81, 33, 11, 13, 10, 11, 12, 11, 11, 11, 11, 13, 10, 7, 13, 10, 13, 11, 13, 10, 16, 89, 116, 126, 108, 125, 103, 17, 92, 121, 132, 67, 12, 12, 22, 21, 27, 26, 25, 23, 19, 20, 76, 82, 37, 63, 68, 28, 23, 38, 21, 13, 31, 36, 27, 30, 32, 50, 36, 40, 33, 30, 32, 36, 37, 37, 37, 34, 32, 31, 31, 14, 107, 121, 127, 141, 124, 102, 105, 74, 83, 67, 85, 73, 71, 61, 118, 141, 139, 139, 159, 161, 162, 165, 170, 158, 147, 141, 110, 110, 110, 128, 153, 151, 157, 142, 106, 75, 77, 70, 70, 73, 111, 130, 129, 77, 39, 77, 138, 145, 157, 146, 153, 155, 140, 143, 158, 161, 155, 156, 147, 125, 91, 46, 55, 56, 83, 82, 66, 54, 47, 61, 83, 50, 121, 122, 126, 123, 103, 25, 23, 71, 135, 159, 164, 162, 165, 163, 171, 159, 156, 149, 135, 133, 136, 142, 146, 145, 146, 148, 144, 140, 143, 143, 142, 140, 139, 138, 136, 133, 133, 133, 131, 131, 131, 132, 125, 134, 114, 113, 119, 130, 114, 116, 127, 131, 126, 127, 124, 118, 127, 118, 120, 123, 123, 122, 120, 119, 31, 30, 25, 26, 27, 32, 32, 38, 49, 35, 20, 21, 22, 20, 37, 60, 43, 28, 26, 26, 25, 13, 10, 19, 17, 21, 12, 13, 15, 13, 10, 17, 22, 34, 29, 28, 30, 34, 32, 35, 36, 32, 30, 36, 45, 42, 45, 47, 50, 55, 55, 68, 76, 65, 86, 50, 12, 11, 11, 12, 12, 11, 11, 13, 10, 12, 15, 7, 4, 12, 46, 64, 81, 105, 104, 79, 102, 124, 7, 88, 107, 48, 19, 17, 19, 18, 24, 25, 29, 29, 21, 23, 30, 27, 33, 30, 30, 27, 20, 29, 24, 26, 30, 35, 36, 30, 34, 36, 34, 31, 36, 27, 33, 33, 37, 43, 35, 35, 30, 30, 25, 23, 28, 93, 120, 135, 134, 130, 128, 121, 132, 124, 129, 129, 101, 97, 115, 145, 145, 142, 164, 173, 167, 149, 157, 145, 134, 143, 128, 129, 109, 100, 113, 150, 154, 147, 151, 123, 116, 79, 72, 72, 72, 83, 114, 136, 135, 50, 7, 110, 132, 153, 142, 156, 151, 136, 146, 160, 162, 165, 168, 160, 158, 75, 61, 47, 45, 60, 79, 59, 72, 52, 52, 52, 120, 128, 131, 135, 123, 122, 5, 15, 14, 19, 30, 97, 154, 165, 162, 160, 165, 160, 152, 142, 137, 134, 138, 146, 146, 148, 148, 146, 142, 144, 142, 143, 142, 139, 138, 138, 137, 135, 133, 132, 132, 132, 133, 125, 116, 124, 119, 115, 118, 110, 96, 95, 116, 130, 114, 102, 96, 114, 106, 109, 114, 122, 122, 121, 120, 29, 31, 26, 29, 36, 34, 36, 54, 59, 62, 41, 26, 17, 20, 28, 16, 27, 25, 32, 26, 29, 8, 8, 13, 10, 6, 2, 6, 11, 21, 12, 12, 28, 32, 33, 40, 46, 45, 48, 53, 53, 45, 50, 61, 67, 76, 59, 53, 55, 57, 53, 52, 58, 71, 76, 13, 11, 11, 12, 13, 13, 11, 11, 7, 13, 19, 48, 69, 77, 97, 92, 95, 74, 29, 26, 122, 65, 34, 30, 27, 16, 26, 15, 20, 28, 33, 32, 33, 23, 29, 32, 29, 28, 29, 28, 28, 31, 25, 24, 25, 33, 36, 35, 40, 42, 36, 33, 33, 35, 35, 31, 36, 37, 39, 38, 34, 26, 27, 22, 26, 26, 72, 134, 138, 144, 145, 138, 148, 150, 139, 153, 159, 133, 143, 146, 142, 134, 140, 158, 165, 157, 149, 146, 136, 122, 49, 88, 130, 134, 108, 119, 144, 156, 158, 151, 158, 117, 89, 68, 59, 65, 71, 102, 135, 142, 119, 24, 91, 130, 127, 141, 160, 144, 136, 145, 156, 168, 170, 169, 159, 161, 130, 120, 98, 71, 57, 89, 75, 119, 92, 33, 94, 132, 131, 144, 136, 134, 103, 15, 5, 16, 20, 14, 17, 18, 58, 134, 168, 163, 162, 159, 147, 135, 133, 135, 139, 145, 146, 143, 146, 147, 144, 145, 145, 143, 141, 139, 141, 138, 137, 137, 135, 133, 130, 129, 113, 83, 119, 105, 112, 100, 107, 95, 91, 82, 81, 72, 76, 91, 105, 113, 101, 102, 116, 118, 120, 121, 31, 34, 32, 34, 35, 42, 50, 56, 48, 31, 3, 14, 20, 32, 37, 38, 23, 28, 30, 29, 25, 12, 17, 17, 12, 12, 7, 11, 8, 11, 14, 30, 35, 36, 54, 61, 48, 52, 77, 66, 77, 78, 65, 71, 61, 73, 84, 84, 86, 74, 64, 83, 76, 73, 7, 13, 10, 17, 19, 16, 14, 15, 26, 53, 70, 70, 83, 86, 84, 109, 103, 64, 27, 20, 8, 35, 43, 15, 28, 29, 21, 25, 27, 39, 40, 35, 29, 32, 33, 28, 30, 36, 34, 38, 28, 29, 30, 27, 28, 30, 32, 38, 38, 37, 38, 38, 34, 36, 34, 30, 33, 35, 35, 35, 39, 32, 28, 35, 35, 26, 23, 116, 150, 139, 159, 157, 148, 154, 168, 162, 159, 156, 148, 159, 150, 135, 137, 152, 162, 140, 148, 144, 133, 114, 40, 16, 40, 131, 131, 118, 115, 129, 154, 157, 152, 157, 143, 124, 107, 72, 98, 73, 85, 117, 144, 137, 87, 28, 140, 134, 146, 154, 150, 154, 146, 156, 160, 167, 171, 159, 178, 164, 152, 151, 147, 136, 127, 102, 150, 152, 91, 113, 127, 147, 153, 148, 123, 48, 16, 12, 12, 12, 12, 12, 12, 12, 19, 28, 81, 155, 159, 148, 130, 130, 136, 138, 140, 147, 154, 146, 144, 141, 146, 145, 144, 146, 145, 144, 139, 142, 139, 136, 141, 121, 126, 108, 100, 126, 96, 50, 63, 63, 85, 51, 37, 64, 62, 62, 63, 72, 76, 89, 96, 97, 86, 109, 110, 34, 31, 34, 40, 37, 40, 40, 40, 37, 30, 25, 29, 34, 34, 30, 28, 24, 23, 21, 26, 39, 16, 6, 12, 11, 15, 14, 5, 13, 10, 8, 8, 32, 43, 59, 69, 79, 75, 72, 68, 63, 61, 53, 60, 80, 79, 69, 69, 70, 70, 61, 72, 90, 94, 71, 6, 3, 12, 16, 28, 44, 57, 63, 61, 58, 79, 79, 78, 85, 97, 87, 60, 35, 22, 22, 25, 25, 23, 29, 29, 27, 27, 28, 34, 34, 37, 29, 27, 32, 31, 30, 36, 36, 35, 34, 31, 29, 32, 33, 33, 36, 37, 41, 40, 36, 35, 35, 30, 32, 33, 34, 33, 31, 42, 32, 31, 27, 26, 26, 33, 32, 96, 142, 138, 163, 175, 175, 168, 152, 173, 183, 160, 153, 157, 143, 128, 129, 135, 134, 121, 128, 67, 52, 103, 34, 11, 64, 87, 137, 140, 123, 115, 152, 134, 152, 159, 147, 116, 122, 94, 135, 74, 89, 94, 130, 128, 116, 48, 94, 122, 135, 155, 148, 156, 149, 158, 157, 163, 174, 175, 170, 179, 167, 167, 169, 164, 162, 152, 152, 155, 153, 158, 139, 161, 154, 153, 134, 62, 9, 12, 12, 12, 12, 12, 12, 12, 16, 18, 11, 22, 42, 105, 142, 133, 134, 131, 144, 149, 151, 144, 146, 144, 146, 145, 145, 146, 145, 145, 144, 140, 139, 143, 138, 119, 124, 114, 115, 111, 70, 65, 66, 52, 27, 36, 82, 87, 87, 84, 68, 64, 69, 70, 85, 88, 94, 96, 107, 37, 31, 36, 33, 42, 41, 28, 27, 31, 35, 35, 31, 34, 28, 24, 24, 28, 26, 26, 45, 55, 30, 12, 14, 21, 7, 13, 10, 8, 13, 10, 15, 12, 45, 62, 73, 75, 78, 80, 76, 68, 56, 55, 74, 75, 72, 78, 69, 78, 83, 77, 72, 67, 79, 82, 71, 45, 44, 51, 56, 51, 43, 49, 64, 56, 56, 71, 65, 60, 90, 96, 85, 52, 24, 29, 20, 25, 33, 13, 10, 25, 26, 29, 28, 27, 28, 30, 31, 27, 26, 29, 36, 32, 35, 36, 33, 33, 33, 33, 33, 33, 32, 40, 35, 42, 37, 38, 37, 34, 30, 30, 29, 30, 33, 33, 38, 35, 33, 24, 28, 24, 38, 42, 42, 124, 127, 157, 161, 172, 175, 139, 159, 162, 154, 154, 146, 127, 87, 61, 52, 57, 56, 25, 54, 87, 90, 48, 46, 110, 58, 160, 161, 148, 122, 141, 129, 149, 153, 138, 129, 105, 96, 89, 98, 92, 96, 110, 118, 107, 89, 85, 122, 139, 154, 151, 152, 157, 156, 155, 170, 176, 180, 177, 165, 166, 166, 172, 167, 162, 182, 163, 165, 161, 149, 153, 172, 159, 159, 146, 115, 9, 12, 12, 12, 12, 12, 12, 12, 9, 7, 12, 16, 14, 12, 39, 65, 109, 128, 134, 141, 150, 145, 146, 146, 147, 146, 145, 147, 146, 145, 143, 144, 141, 137, 122, 119, 123, 118, 120, 119, 90, 72, 96, 94, 80, 65, 81, 94, 92, 95, 85, 70, 64, 80, 85, 83, 84, 98, 111, 40, 36, 36, 33, 33, 26, 27, 27, 29, 32, 28, 24, 25, 28, 29, 30, 35, 38, 42, 47, 64, 48, 40, 44, 80, 91, 64, 73, 87, 53, 23, 71, 79, 78, 77, 83, 87, 75, 64, 60, 65, 71, 75, 89, 96, 83, 78, 70, 63, 53, 56, 62, 57, 60, 62, 58, 58, 59, 63, 67, 79, 66, 64, 68, 60, 64, 64, 74, 84, 70, 43, 22, 34, 15, 27, 32, 13, 23, 26, 29, 28, 29, 29, 29, 26, 30, 30, 27, 39, 38, 34, 34, 34, 32, 32, 33, 31, 32, 33, 38, 34, 37, 37, 38, 37, 34, 34, 32, 28, 30, 34, 35, 36, 40, 31, 26, 31, 29, 32, 56, 43, 33, 152, 153, 171, 169, 166, 145, 143, 146, 156, 157, 68, 62, 47, 54, 63, 46, 77, 89, 93, 116, 57, 55, 71, 123, 82, 161, 157, 148, 140, 131, 137, 153, 162, 150, 134, 45, 79, 73, 77, 95, 94, 97, 102, 93, 83, 77, 125, 142, 147, 154, 152, 167, 155, 153, 162, 176, 183, 172, 167, 164, 171, 179, 171, 155, 172, 169, 166, 166, 158, 150, 167, 163, 162, 149, 127, 16, 13, 12, 12, 12, 12, 12, 12, 13, 10, 12, 14, 12, 13, 12, 14, 13, 22, 48, 90, 135, 149, 147, 144, 147, 147, 146, 146, 148, 147, 146, 144, 146, 142, 133, 88, 103, 125, 127, 125, 133, 119, 92, 94, 97, 95, 83, 58, 83, 82, 93, 98, 89, 69, 66, 67, 65, 64, 63, 94, 40, 35, 32, 26, 24, 27, 28, 28, 32, 28, 22, 26, 30, 31, 37, 35, 43, 47, 51, 54, 60, 64, 93, 83, 79, 86, 95, 114, 112, 76, 52, 68, 75, 75, 74, 69, 73, 61, 61, 58, 75, 84, 87, 86, 66, 63, 57, 58, 68, 73, 69, 57, 53, 51, 55, 60, 65, 71, 75, 70, 65, 60, 61, 57, 52, 57, 63, 66, 77, 63, 34, 23, 34, 24, 27, 35, 16, 23, 30, 31, 31, 34, 36, 32, 32, 35, 32, 28, 40, 39, 33, 32, 39, 35, 31, 30, 31, 31, 33, 35, 33, 32, 39, 35, 36, 38, 36, 33, 32, 33, 34, 33, 37, 35, 27, 30, 31, 32, 37, 33, 81, 132, 156, 154, 154, 140, 146, 153, 135, 143, 144, 74, 8, 130, 137, 139, 145, 140, 137, 116, 79, 81, 54, 55, 65, 90, 100, 146, 156, 149, 157, 138, 138, 169, 175, 169, 161, 138, 162, 122, 75, 55, 63, 60, 60, 69, 89, 66, 112, 149, 145, 159, 161, 146, 144, 150, 159, 174, 182, 173, 156, 126, 169, 180, 171, 153, 172, 172, 167, 168, 166, 158, 167, 160, 158, 152, 129, 55, 11, 12, 12, 12, 12, 12, 12, 11, 13, 10, 13, 13, 10, 9, 12, 8, 14, 13, 18, 13, 35, 73, 122, 144, 148, 149, 144, 147, 147, 149, 145, 148, 147, 143, 135, 97, 110, 122, 133, 134, 135, 125, 121, 87, 93, 96, 94, 70, 66, 47, 78, 98, 95, 80, 58, 60, 53, 36, 40, 59, 33, 29, 28, 27, 30, 30, 29, 27, 28, 29, 30, 35, 36, 41, 49, 52, 60, 62, 63, 60, 64, 44, 36, 38, 34, 30, 28, 36, 34, 44, 36, 67, 75, 79, 62, 62, 54, 55, 66, 68, 73, 60, 43, 27, 20, 61, 74, 79, 83, 80, 72, 57, 54, 54, 53, 55, 50, 52, 52, 49, 45, 36, 47, 44, 46, 46, 59, 68, 60, 73, 46, 22, 32, 29, 27, 34, 21, 26, 29, 36, 32, 36, 42, 37, 41, 37, 28, 24, 30, 28, 30, 32, 40, 35, 31, 31, 30, 29, 30, 33, 29, 27, 37, 33, 38, 38, 36, 31, 34, 35, 35, 35, 35, 33, 29, 29, 34, 31, 31, 32, 130, 144, 153, 153, 148, 144, 149, 143, 122, 155, 93, 22, 36, 143, 146, 151, 147, 148, 127, 79, 73, 56, 52, 58, 56, 62, 98, 143, 148, 149, 167, 157, 155, 175, 185, 169, 187, 171, 178, 173, 141, 116, 100, 64, 57, 63, 69, 53, 121, 153, 155, 167, 164, 160, 152, 143, 161, 174, 188, 172, 146, 121, 168, 177, 171, 159, 178, 171, 164, 165, 168, 162, 161, 153, 158, 157, 121, 77, 12, 12, 12, 12, 12, 12, 12, 12, 12, 12, 13, 10, 11, 12, 15, 11, 13, 13, 14, 28, 19, 27, 52, 99, 130, 149, 145, 146, 145, 147, 150, 145, 143, 133, 93, 102, 119, 129, 139, 140, 127, 123, 111, 105, 105, 107, 85, 65, 31, 62, 80, 80, 66, 56, 60, 43, 32, 31, 36, 26, 29, 29, 31, 30, 28, 20, 23, 26, 40, 42, 49, 43, 51, 44, 47, 47, 52, 59, 60, 62, 53, 18, 24, 21, 30, 27, 18, 20, 20, 16, 61, 79, 74, 64, 65, 66, 51, 49, 36, 21, 13, 10, 3, 6, 16, 66, 63, 58, 62, 64, 60, 51, 53, 53, 52, 50, 51, 57, 53, 53, 45, 43, 49, 51, 57, 50, 63, 52, 56, 75, 52, 26, 30, 29, 26, 30, 22, 28, 28, 32, 38, 33, 31, 29, 33, 24, 25, 20, 31, 26, 27, 31, 33, 30, 30, 30, 31, 31, 29, 30, 33, 28, 34, 34, 40, 36, 33, 32, 32, 33, 33, 33, 34, 35, 31, 29, 34, 24, 33, 29, 108, 131, 147, 149, 105, 128, 143, 143, 139, 132, 30, 28, 128, 140, 154, 160, 149, 142, 104, 75, 60, 53, 49, 50, 53, 62, 76, 108, 129, 149, 165, 168, 174, 175, 183, 154, 182, 179, 174, 187, 173, 178, 146, 114, 86, 96, 65, 78, 117, 155, 161, 156, 171, 155, 139, 151, 149, 163, 184, 179, 154, 151, 170, 174, 174, 173, 175, 169, 166, 164, 170, 163, 149, 161, 148, 137, 110, 61, 11, 12, 12, 12, 12, 12, 12, 12, 12, 12, 11, 11, 13, 10, 8, 19, 8, 36, 94, 119, 70, 67, 105, 74, 94, 112, 127, 131, 139, 132, 132, 142, 143, 119, 94, 105, 119, 129, 139, 145, 131, 131, 116, 82, 99, 102, 91, 73, 34, 33, 51, 51, 45, 43, 59, 52, 39, 37, 26, 28, 31, 28, 27, 25, 24, 23, 32, 39, 48, 52, 52, 45, 51, 48, 50, 55, 61, 68, 66, 79, 64, 15, 20, 17, 19, 22, 14, 20, 12, 7, 63, 51, 64, 52, 27, 19, 11, 3, 3, 5, 7, 9, 7, 11, 52, 44, 52, 51, 54, 50, 49, 49, 45, 46, 42, 43, 44, 44, 46, 47, 48, 56, 67, 54, 46, 67, 67, 64, 78, 63, 23, 33, 23, 21, 24, 20, 28, 30, 28, 22, 23, 19, 35, 53, 40, 24, 15, 30, 24, 28, 32, 31, 29, 30, 28, 31, 34, 33, 28, 37, 35, 32, 32, 37, 34, 31, 32, 27, 28, 28, 28, 34, 34, 31, 29, 31, 25, 28, 34, 50, 66, 93, 84, 51, 140, 151, 146, 141, 116, 9, 96, 140, 148, 160, 154, 146, 137, 96, 72, 73, 70, 67, 68, 69, 59, 62, 77, 113, 155, 170, 174, 173, 174, 188, 188, 195, 190, 176, 188, 180, 169, 168, 134, 145, 133, 52, 44, 136, 156, 163, 168, 165, 161, 157, 143, 163, 168, 176, 169, 160, 157, 169, 170, 174, 179, 168, 166, 171, 162, 166, 164, 152, 147, 152, 129, 105, 50, 13, 12, 12, 12, 12, 12, 12, 12, 12, 12, 12, 12, 11, 15, 2, 65, 111, 128, 120, 125, 111, 109, 115, 112, 113, 118, 118, 117, 116, 121, 119, 127, 132, 129, 111, 115, 128, 132, 148, 137, 141, 110, 71, 105, 110, 108, 91, 37, 37, 73, 68, 71, 51, 63, 69, 66, 31, 29, 33, 30, 27, 25, 29, 35, 34, 32, 52, 60, 52, 49, 51, 47, 52, 52, 46, 59, 72, 67, 72, 69, 19, 14, 18, 16, 9, 5, 11, 22, 38, 56, 48, 42, 25, 4, 15, 22, 9, 7, 8, 13, 10, 13, 8, 3, 36, 44, 42, 38, 46, 50, 52, 49, 41, 42, 42, 50, 47, 49, 41, 47, 48, 51, 64, 63, 51, 52, 59, 54, 71, 74, 21, 33, 12, 19, 24, 20, 32, 29, 32, 39, 41, 32, 33, 33, 63, 63, 28, 32, 31, 32, 32, 31, 31, 31, 27, 26, 33, 34, 31, 29, 36, 32, 30, 33, 32, 31, 31, 22, 31, 31, 31, 32, 31, 28, 30, 27, 28, 27, 24, 18, 21, 25, 23, 81, 144, 143, 145, 140, 124, 42, 119, 154, 152, 154, 145, 146, 119, 90, 83, 89, 78, 72, 73, 77, 62, 62, 74, 89, 145, 175, 175, 161, 169, 183, 187, 188, 191, 188, 183, 180, 183, 179, 120, 158, 160, 128, 95, 160, 169, 158, 173, 167, 163, 159, 135, 157, 164, 169, 163, 162, 168, 172, 161, 164, 179, 167, 169, 162, 162, 163, 166, 166, 147, 155, 122, 95, 36, 12, 12, 12, 12, 12, 12, 12, 12, 12, 12, 11, 15, 20, 13, 59, 144, 133, 127, 124, 120, 120, 107, 107, 117, 117, 95, 100, 115, 112, 117, 122, 127, 138, 141, 107, 119, 128, 133, 142, 138, 143, 121, 113, 116, 129, 124, 105, 20, 41, 68, 72, 61, 49, 79, 96, 71, 53, 41, 18, 23, 35, 38, 39, 43, 51, 54, 64, 54, 63, 60, 50, 46, 50, 60, 65, 72, 76, 50, 55, 73, 12, 20, 18, 5, 9, 24, 49, 51, 50, 52, 55, 48, 42, 11, 15, 8, 9, 13, 10, 13, 10, 8, 6, 4, 5, 33, 50, 48, 55, 42, 35, 54, 55, 55, 47, 48, 56, 59, 56, 54, 43, 42, 44, 53, 53, 49, 51, 43, 41, 63, 72, 25, 31, 29, 33, 33, 26, 28, 23, 30, 30, 31, 29, 34, 42, 53, 97, 55, 26, 29, 30, 30, 30, 29, 30, 26, 26, 27, 33, 35, 32, 28, 30, 30, 33, 34, 32, 32, 25, 18, 27, 28, 29, 27, 25, 26, 28, 27, 26, 21, 15, 14, 25, 20, 97, 142, 156, 162, 145, 130, 50, 71, 134, 148, 144, 159, 141, 120, 70, 94, 96, 74, 79, 69, 69, 80, 73, 83, 86, 126, 165, 168, 174, 164, 171, 189, 195, 196, 192, 195, 184, 188, 183, 168, 178, 187, 180, 181, 179, 172, 162, 162, 145, 158, 159, 103, 148, 163, 157, 174, 173, 177, 169, 141, 162, 172, 161, 152, 151, 151, 162, 161, 153, 139, 144, 117, 112, 27, 21, 5, 7, 13, 15, 11, 8, 16, 6, 9, 15, 26, 130, 99, 128, 136, 124, 121, 125, 121, 119, 91, 65, 46, 60, 69, 88, 94, 105, 113, 119, 122, 130, 139, 136, 130, 129, 137, 131, 127, 143, 137, 109, 115, 129, 127, 118, 26, 41, 48, 49, 51, 44, 71, 68, 73, 51, 44, 30, 34, 41, 54, 57, 58, 58, 58, 62, 54, 56, 65, 59, 52, 55, 59, 61, 59, 60, 62, 73, 84, 16, 3, 16, 42, 56, 63, 53, 54, 52, 47, 47, 40, 39, 9, 15, 9, 9, 11, 13, 10, 9, 7, 6, 7, 35, 53, 48, 48, 54, 49, 53, 58, 54, 49, 52, 54, 50, 51, 52, 52, 54, 57, 54, 52, 48, 47, 40, 32, 35, 33, 27, 41, 40, 37, 38, 46, 47, 49, 43, 38, 40, 42, 27, 42, 70, 108, 96, 33, 29, 33, 30, 29, 29, 29, 27, 31, 32, 35, 35, 29, 26, 28, 28, 31, 35, 31, 29, 26, 15, 18, 18, 17, 15, 14, 17, 18, 18, 15, 13, 13, 10, 11, 15, 87, 148, 149, 156, 158, 153, 131, 114, 52, 107, 136, 148, 162, 140, 148, 68, 104, 86, 83, 90, 115, 63, 95, 86, 94, 122, 147, 184, 162, 166, 165, 168, 192, 195, 191, 197, 194, 190, 186, 185, 185, 181, 172, 173, 176, 188, 179, 180, 172, 148, 152, 155, 137, 155, 157, 165, 177, 181, 182, 174, 155, 158, 147, 156, 157, 118, 134, 149, 149, 143, 144, 134, 119, 84, 25, 5, 17, 12, 18, 38, 12, 11, 14, 19, 13, 16, 90, 132, 119, 134, 126, 102, 98, 47, 63, 31, 23, 48, 82, 52, 74, 88, 101, 108, 109, 115, 119, 116, 124, 136, 131, 126, 135, 123, 131, 148, 139, 137, 134, 139, 138, 127, 54, 87, 69, 43, 32, 52, 63, 57, 48, 42, 46, 32, 43, 55, 56, 57, 52, 55, 57, 56, 52, 54, 60, 56, 54, 57, 64, 69, 80, 71, 73, 73, 71, 14, 29, 54, 52, 46, 52, 49, 46, 47, 50, 41, 41, 36, 6, 16, 13, 10, 9, 11, 12, 11, 13, 10, 9, 8, 26, 49, 39, 51, 59, 57, 58, 55, 50, 45, 47, 54, 57, 55, 52, 62, 53, 34, 29, 21, 16, 17, 30, 29, 30, 26, 26, 33, 34, 31, 33, 39, 47, 48, 49, 38, 48, 59, 50, 43, 71, 84, 99, 51, 27, 34, 32, 31, 31, 31, 29, 34, 35, 34, 33, 27, 27, 25, 26, 30, 30, 26, 23, 13, 12, 12, 11, 12, 12, 11, 12, 13, 12, 13, 12, 13, 14, 13, 10, 63, 14
[truncated: 1,939,436 more chars]
