# Supplementary material for: Analysis of DES Plaintext Recovery Based on BP Neural Network
Source: Hindawi journal article supplement (doi:10.1155/2019/9580862), 2019-11-11
Supplement: f1 [file 9580862.f1.zip › 9580862.f1/plain/plain9]

[32, 35, 35, 35, 36, 32, 30, 34, 35, 32, 28, 30, 28, 22, 28, 55, 77, 95, 98, 89, 67, 40, 23, 17, 15, 20, 26, 27, 26, 28, 28, 27, 24, 22, 21, 21, 25, 22, 21, 25, 29, 26, 18, 16, 22, 29, 29, 25, 23, 24, 23, 23, 22, 22, 22, 22, 23, 23, 23, 23, 24, 25, 26, 26, 25, 24, 25, 29, 27, 22, 20, 18, 23, 46, 75, 76, 51, 27, 31, 29, 20, 19, 23, 27, 28, 27, 27, 28, 28, 27, 27, 27, 28, 30, 31, 29, 26, 25, 26, 27, 27, 27, 27, 27, 27, 27, 26, 25, 26, 26, 27, 28, 28, 26, 26, 27, 25, 24, 24, 26, 26, 25, 24, 24, 26, 26, 24, 25, 26, 28, 28, 26, 24, 25, 25, 24, 23, 25, 27, 28, 27, 27, 27, 27, 26, 26, 25, 25, 25, 25, 25, 25, 25, 25, 25, 25, 25, 25, 25, 25, 25, 25, 25, 25, 25, 26, 26, 27, 27, 27, 27, 27, 27, 27, 27, 27, 26, 26, 26, 26, 28, 29, 29, 30, 30, 30, 30, 30, 30, 30, 30, 30, 30, 30, 30, 30, 30, 30, 30, 30, 30, 29, 30, 30, 31, 32, 33, 33, 33, 33, 32, 31, 30, 29, 29, 28, 29, 29, 29, 29, 29, 29, 29, 29, 29, 29, 29, 29, 29, 29, 29, 29, 29, 29, 29, 29, 28, 28, 28, 29, 29, 30, 30, 31, 30, 30, 29, 29, 30, 31, 32, 30, 29, 30, 32, 33, 32, 33, 31, 32, 35, 33, 33, 38, 29, 31, 23, 20, 19, 23, 56, 111, 119, 97, 59, 32, 24, 21, 25, 23, 22, 25, 29, 28, 25, 28, 28, 26, 25, 23, 22, 22, 22, 23, 25, 27, 29, 28, 25, 23, 25, 27, 28, 26, 23, 21, 23, 23, 24, 25, 27, 29, 31, 31, 31, 30, 29, 28, 27, 27, 29, 28, 25, 24, 25, 28, 30, 26, 18, 23, 52, 82, 86, 72, 32, 20, 21, 21, 21, 23, 27, 26, 26, 27, 27, 27, 27, 27, 28, 29, 30, 28, 26, 25, 26, 26, 26, 26, 26, 26, 26, 26, 25, 25, 25, 26, 26, 26, 27, 27, 27, 27, 26, 24, 24, 26, 26, 25, 24, 24, 26, 26, 24, 24, 26, 28, 28, 26, 24, 25, 25, 24, 23, 25, 27, 29, 27, 27, 27, 27, 26, 26, 25, 25, 25, 25, 25, 25, 25, 25, 25, 25, 25, 25, 25, 25, 25, 25, 25, 25, 25, 26, 26, 27, 27, 27, 27, 27, 27, 27, 27, 27, 26, 26, 26, 26, 33, 33, 32, 31, 30, 30, 29, 30, 30, 30, 30, 30, 30, 30, 30, 30, 30, 30, 30, 30, 30, 30, 30, 30, 29, 29, 29, 29, 29, 29, 29, 30, 30, 31, 31, 30, 29, 29, 29, 29, 29, 29, 29, 29, 29, 29, 29, 29, 29, 29, 29, 29, 29, 29, 29, 29, 28, 28, 28, 29, 29, 30, 30, 31, 30, 30, 29, 29, 30, 31, 31, 30, 28, 30, 32, 33, 32, 32, 29, 29, 30, 27, 27, 32, 25, 21, 21, 42, 67, 80, 98, 89, 71, 46, 31, 30, 33, 30, 28, 25, 21, 21, 24, 26, 28, 27, 27, 27, 26, 25, 26, 27, 26, 29, 31, 28, 25, 26, 32, 30, 26, 23, 25, 28, 28, 25, 28, 29, 28, 27, 26, 27, 28, 28, 28, 28, 29, 29, 29, 29, 27, 29, 30, 28, 28, 28, 25, 25, 28, 26, 24, 41, 68, 84, 75, 56, 32, 21, 21, 23, 23, 25, 26, 28, 28, 27, 27, 27, 28, 29, 30, 28, 25, 24, 25, 26, 26, 26, 26, 26, 26, 26, 25, 25, 25, 25, 25, 26, 26, 27, 28, 29, 26, 24, 24, 26, 26, 25, 24, 24, 26, 25, 24, 25, 26, 28, 28, 25, 24, 25, 25, 24, 23, 25, 27, 29, 28, 27, 27, 27, 26, 26, 25, 25, 25, 25, 25, 25, 25, 25, 25, 25, 25, 25, 25, 25, 25, 25, 25, 25, 25, 26, 26, 27, 27, 27, 27, 27, 27, 27, 27, 27, 26, 26, 26, 26, 34, 34, 32, 31, 31, 30, 30, 30, 30, 30, 30, 30, 30, 30, 30, 30, 30, 30, 30, 30, 30, 31, 30, 30, 29, 28, 27, 27, 27, 27, 28, 29, 31, 32, 33, 31, 31, 31, 30, 29, 29, 29, 29, 29, 29, 29, 29, 29, 29, 29, 29, 29, 29, 29, 29, 29, 28, 28, 28, 29, 29, 30, 30, 31, 30, 30, 29, 29, 30, 31, 31, 29, 28, 29, 32, 33, 32, 33, 30, 28, 28, 25, 25, 30, 21, 24, 57, 96, 116, 112, 90, 39, 18, 14, 29, 37, 32, 26, 19, 18, 19, 22, 26, 28, 29, 27, 27, 27, 26, 26, 27, 28, 30, 32, 32, 29, 26, 26, 28, 28, 27, 26, 26, 27, 27, 26, 29, 29, 28, 27, 27, 27, 27, 27, 27, 28, 29, 29, 30, 31, 26, 29, 33, 31, 31, 31, 26, 20, 23, 27, 24, 22, 37, 64, 95, 95, 79, 56, 36, 23, 18, 24, 28, 28, 29, 28, 28, 27, 28, 29, 30, 28, 25, 24, 25, 26, 26, 26, 26, 26, 26, 26, 25, 25, 25, 25, 25, 25, 25, 27, 29, 29, 27, 25, 24, 26, 26, 25, 24, 24, 26, 26, 24, 24, 26, 28, 28, 26, 24, 25, 25, 24, 23, 25, 27, 29, 27, 27, 27, 27, 26, 26, 25, 25, 25, 25, 25, 25, 25, 25, 25, 25, 25, 25, 25, 25, 25, 25, 25, 25, 25, 26, 26, 27, 27, 27, 27, 27, 27, 27, 27, 27, 26, 26, 26, 26, 29, 30, 30, 30, 30, 30, 31, 30, 30, 30, 30, 30, 30, 30, 30, 30, 30, 30, 30, 30, 30, 29, 30, 30, 31, 31, 32, 32, 32, 32, 31, 31, 31, 31, 31, 30, 30, 30, 29, 28, 28, 28, 28, 28, 28, 28, 29, 29, 29, 29, 29, 30, 30, 31, 31, 31, 30, 30, 30, 30, 30, 30, 29, 30, 30, 30, 29, 30, 30, 30, 29, 28, 28, 30, 32, 33, 33, 34, 29, 32, 31, 26, 26, 25, 21, 59, 107, 125, 121, 98, 56, 24, 20, 25, 32, 31, 32, 40, 25, 23, 24, 27, 29, 29, 27, 28, 28, 27, 26, 26, 26, 26, 29, 29, 29, 29, 29, 29, 29, 28, 30, 31, 29, 26, 25, 27, 27, 27, 28, 28, 29, 30, 30, 31, 31, 30, 29, 29, 29, 28, 29, 30, 29, 27, 30, 34, 34, 31, 24, 22, 26, 23, 22, 33, 50, 80, 93, 77, 57, 30, 14, 19, 24, 26, 26, 27, 28, 29, 28, 28, 28, 27, 25, 25, 25, 25, 25, 25, 26, 26, 25, 25, 24, 24, 25, 25, 25, 25, 25, 27, 28, 28, 26, 25, 25, 26, 26, 26, 25, 25, 26, 25, 25, 25, 26, 27, 27, 26, 25, 26, 26, 25, 25, 25, 27, 27, 26, 26, 26, 26, 26, 26, 26, 26, 26, 26, 26, 26, 25, 25, 24, 25, 25, 25, 24, 25, 26, 26, 26, 26, 25, 26, 27, 28, 27, 26, 27, 27, 27, 26, 26, 26, 26, 25, 25, 25, 34, 33, 32, 32, 30, 30, 30, 30, 30, 30, 30, 30, 30, 30, 30, 30, 30, 30, 30, 30, 30, 30, 30, 30, 30, 30, 30, 30, 30, 30, 30, 30, 30, 30, 30, 29, 29, 29, 28, 27, 27, 27, 27, 27, 27, 28, 28, 29, 29, 29, 30, 31, 32, 33, 33, 33, 34, 34, 34, 33, 31, 30, 29, 30, 30, 30, 30, 30, 30, 30, 29, 29, 30, 31, 32, 33, 35, 35, 34, 32, 31, 25, 28, 53, 72, 105, 118, 109, 95, 64, 33, 22, 25, 28, 29, 31, 34, 38, 29, 25, 23, 24, 26, 27, 26, 27, 27, 27, 27, 27, 27, 27, 28, 29, 29, 29, 28, 28, 28, 28, 29, 29, 28, 26, 27, 29, 30, 30, 30, 29, 29, 28, 28, 29, 29, 29, 29, 29, 29, 29, 29, 29, 29, 29, 30, 30, 30, 32, 30, 28, 24, 21, 19, 18, 28, 65, 72, 62, 72, 55, 31, 24, 22, 18, 20, 25, 28, 28, 27, 27, 27, 26, 26, 25, 25, 24, 25, 25, 26, 26, 25, 24, 24, 24, 25, 26, 26, 26, 26, 26, 27, 26, 26, 26, 26, 27, 27, 27, 27, 26, 26, 25, 25, 25, 25, 25, 26, 26, 27, 27, 27, 27, 27, 26, 26, 25, 25, 25, 25, 25, 26, 26, 27, 27, 27, 27, 28, 27, 26, 25, 23, 25, 26, 24, 24, 26, 27, 27, 26, 26, 25, 27, 28, 28, 26, 25, 26, 28, 28, 26, 24, 25, 25, 25, 25, 25, 37, 36, 34, 32, 31, 29, 28, 30, 30, 30, 30, 30, 30, 30, 30, 30, 30, 30, 30, 30, 30, 30, 30, 30, 30, 30, 30, 30, 30, 30, 30, 30, 30, 30, 30, 29, 29, 29, 29, 28, 28, 28, 28, 28, 28, 28, 29, 29, 29, 29, 30, 31, 32, 33, 33, 33, 33, 33, 33, 33, 31, 30, 30, 31, 31, 31, 31, 31, 31, 31, 27, 28, 29, 31, 33, 34, 36, 31, 39, 29, 28, 23, 35, 101, 124, 116, 101, 87, 52, 16, 13, 35, 29, 25, 30, 30, 30, 37, 30, 26, 24, 24, 26, 27, 26, 27, 27, 27, 27, 27, 27, 27, 27, 27, 27, 27, 27, 27, 27, 27, 28, 28, 27, 25, 26, 28, 31, 30, 28, 26, 26, 27, 28, 28, 28, 28, 28, 28, 28, 28, 29, 29, 31, 31, 31, 31, 31, 28, 27, 27, 27, 25, 24, 22, 24, 52, 61, 56, 69, 69, 65, 47, 28, 13, 15, 26, 32, 28, 26, 27, 27, 26, 25, 25, 25, 24, 25, 25, 26, 25, 25, 24, 24, 25, 26, 27, 27, 27, 27, 28, 28, 27, 27, 27, 27, 28, 27, 27, 27, 26, 26, 25, 25, 25, 25, 25, 26, 26, 27, 27, 27, 27, 27, 26, 26, 25, 25, 25, 25, 25, 26, 26, 27, 27, 27, 27, 28, 27, 26, 25, 24, 25, 26, 23, 23, 25, 26, 24, 24, 24, 24, 26, 28, 28, 26, 25, 26, 28, 28, 26, 24, 25, 25, 25, 25, 25, 29, 29, 29, 30, 30, 30, 30, 30, 30, 30, 30, 30, 30, 30, 30, 30, 30, 30, 30, 30, 30, 30, 30, 30, 30, 30, 30, 30, 30, 30, 30, 30, 30, 30, 30, 29, 29, 29, 29, 29, 29, 29, 29, 29, 29, 29, 29, 29, 29, 29, 30, 31, 32, 32, 32, 31, 31, 31, 32, 33, 33, 32, 31, 32, 32, 32, 32, 32, 32, 32, 29, 29, 30, 31, 33, 35, 36, 36, 29, 31, 23, 21, 58, 104, 109, 104, 90, 70, 39, 16, 25, 37, 26, 23, 32, 30, 27, 33, 29, 26, 24, 24, 26, 27, 26, 27, 27, 27, 27, 27, 27, 27, 27, 27, 27, 27, 27, 27, 27, 27, 28, 28, 26, 25, 26, 28, 31, 30, 28, 26, 25, 27, 29, 28, 28, 28, 28, 28, 28, 28, 27, 27, 28, 28, 28, 29, 29, 28, 28, 29, 29, 27, 24, 22, 20, 39, 53, 52, 58, 61, 64, 58, 44, 25, 19, 24, 30, 30, 27, 26, 26, 25, 25, 24, 24, 23, 24, 24, 25, 25, 24, 23, 24, 26, 27, 28, 28, 28, 27, 28, 28, 28, 27, 27, 28, 28, 28, 27, 27, 26, 26, 25, 25, 25, 25, 25, 26, 26, 27, 27, 27, 27, 27, 26, 26, 25, 25, 25, 25, 25, 26, 26, 27, 27, 27, 27, 28, 27, 26, 25, 23, 25, 26, 23, 23, 24, 25, 24, 24, 24, 24, 25, 28, 28, 26, 25, 26, 28, 28, 26, 24, 25, 25, 25, 25, 25, 31, 31, 30, 31, 30, 30, 30, 30, 30, 30, 30, 30, 30, 30, 30, 30, 30, 30, 30, 30, 30, 30, 30, 30, 30, 30, 30, 30, 30, 30, 30, 30, 30, 30, 30, 29, 29, 29, 29, 30, 30, 30, 30, 30, 30, 29, 29, 29, 29, 29, 30, 31, 31, 31, 30, 30, 30, 30, 31, 32, 33, 33, 33, 33, 33, 33, 33, 33, 33, 33, 29, 30, 30, 32, 33, 35, 37, 42, 22, 31, 18, 32, 103, 126, 92, 92, 67, 35, 20, 18, 27, 29, 23, 23, 29, 28, 24, 27, 29, 27, 25, 25, 26, 27, 26, 27, 27, 27, 27, 27, 27, 27, 28, 28, 28, 28, 28, 28, 28, 28, 29, 29, 27, 26, 27, 29, 31, 30, 28, 26, 26, 27, 28, 28, 28, 28, 28, 28, 28, 28, 26, 25, 25, 25, 26, 26, 27, 28, 30, 31, 30, 28, 27, 26, 21, 30, 46, 52, 50, 50, 52, 65, 60, 42, 28, 24, 27, 30, 27, 26, 26, 25, 25, 24, 24, 23, 24, 24, 25, 25, 24, 23, 24, 25, 26, 27, 27, 27, 27, 27, 28, 27, 27, 27, 27, 28, 27, 27, 27, 26, 26, 25, 25, 25, 25, 25, 26, 26, 27, 27, 27, 27, 27, 26, 26, 25, 25, 25, 25, 25, 26, 26, 27, 27, 27, 27, 28, 27, 26, 25, 23, 25, 25, 24, 24, 26, 28, 27, 27, 27, 26, 27, 29, 29, 26, 25, 26, 28, 28, 26, 24, 25, 25, 25, 25, 25, 33, 33, 32, 31, 30, 30, 29, 30, 30, 30, 30, 30, 30, 30, 30, 30, 30, 30, 30, 30, 30, 30, 30, 30, 30, 30, 30, 30, 30, 30, 30, 30, 30, 30, 30, 29, 29, 29, 30, 30, 31, 31, 31, 31, 31, 30, 29, 29, 29, 29, 30, 31, 31, 30, 30, 29, 29, 30, 31, 32, 33, 34, 34, 34, 34, 34, 34, 34, 34, 34, 30, 30, 31, 32, 33, 35, 36, 36, 33, 31, 15, 35, 98, 126, 90, 79, 42, 13, 15, 22, 24, 25, 28, 28, 25, 23, 24, 25, 28, 27, 25, 25, 27, 27, 26, 27, 27, 27, 27, 27, 27, 27, 27, 27, 28, 28, 28, 28, 28, 28, 29, 29, 28, 26, 27, 29, 29, 29, 29, 28, 28, 27, 27, 28, 28, 28, 28, 28, 28, 28, 27, 26, 27, 26, 27, 27, 28, 28, 28, 29, 30, 32, 34, 36, 30, 27, 37, 44, 40, 43, 47, 54, 48, 32, 23, 23, 26, 28, 27, 26, 26, 25, 25, 24, 24, 23, 24, 24, 25, 25, 24, 23, 23, 24, 25, 26, 27, 26, 26, 26, 27, 26, 26, 26, 26, 27, 27, 27, 27, 26, 26, 25, 25, 25, 25, 25, 26, 26, 27, 27, 27, 27, 27, 26, 26, 25, 25, 25, 25, 25, 26, 26, 27, 27, 27, 27, 28, 27, 26, 25, 23, 24, 25, 24, 25, 28, 30, 30, 31, 30, 29, 29, 30, 28, 26, 24, 26, 28, 28, 26, 24, 25, 25, 25, 25, 25, 33, 33, 33, 32, 31, 29, 28, 30, 30, 31, 31, 32, 32, 32, 29, 30, 31, 32, 32, 32, 31, 27, 27, 28, 28, 29, 27, 26, 25, 26, 26, 27, 28, 29, 29, 26, 27, 27, 28, 29, 29, 29, 29, 29, 30, 32, 33, 34, 35, 35, 34, 34, 33, 32, 31, 31, 27, 27, 27, 27, 27, 27, 26, 26, 27, 28, 29, 30, 31, 32, 30, 30, 31, 33, 34, 33, 31, 23, 29, 27, 21, 24, 54, 90, 78, 63, 28, 24, 28, 30, 21, 18, 23, 25, 22, 19, 22, 26, 28, 27, 26, 27, 28, 28, 26, 23, 26, 31, 34, 34, 32, 30, 33, 35, 26, 24, 27, 25, 36, 31, 23, 22, 22, 29, 26, 33, 21, 20, 34, 27, 25, 25, 28, 27, 31, 29, 27, 27, 24, 27, 25, 27, 26, 29, 33, 28, 26, 26, 29, 31, 30, 27, 27, 30, 28, 25, 29, 35, 39, 43, 47, 50, 40, 23, 16, 19, 23, 24, 32, 30, 22, 22, 25, 27, 26, 26, 26, 25, 24, 24, 25, 25, 25, 24, 26, 26, 27, 27, 28, 27, 27, 27, 26, 26, 26, 25, 25, 24, 26, 25, 25, 24, 24, 24, 25, 25, 26, 25, 27, 28, 28, 28, 27, 26, 25, 24, 24, 25, 25, 25, 26, 26, 27, 27, 27, 27, 28, 26, 25, 24, 25, 26, 25, 24, 25, 27, 29, 29, 29, 28, 28, 28, 28, 27, 26, 26, 27, 27, 27, 26, 24, 25, 25, 25, 25, 25, 30, 31, 31, 31, 30, 29, 28, 29, 30, 30, 31, 32, 33, 34, 28, 29, 31, 32, 32, 32, 32, 22, 24, 27, 30, 33, 34, 33, 32, 32, 30, 29, 28, 26, 26, 28, 28, 28, 29, 29, 29, 29, 26, 28, 29, 31, 33, 35, 36, 35, 35, 35, 34, 32, 32, 31, 26, 26, 26, 26, 25, 25, 25, 26, 26, 26, 26, 26, 27, 27, 31, 31, 30, 32, 34, 34, 31, 34, 29, 24, 19, 20, 50, 78, 68, 51, 12, 16, 13, 17, 18, 26, 27, 24, 20, 17, 16, 16, 25, 24, 21, 22, 27, 32, 34, 32, 25, 15, 12, 14, 16, 17, 24, 33, 35, 36, 31, 23, 25, 13, 27, 44, 31, 29, 26, 39, 53, 57, 36, 16, 33, 37, 27, 35, 35, 28, 28, 22, 11, 15, 29, 34, 25, 20, 23, 21, 25, 24, 24, 24, 19, 14, 12, 13, 12, 11, 13, 20, 31, 41, 45, 52, 45, 28, 22, 21, 20, 15, 14, 22, 28, 24, 17, 20, 30, 31, 29, 28, 28, 27, 25, 24, 24, 25, 25, 26, 27, 28, 28, 27, 27, 28, 28, 27, 26, 24, 23, 24, 25, 25, 25, 24, 24, 25, 26, 26, 25, 24, 25, 26, 26, 26, 25, 24, 24, 24, 25, 25, 25, 25, 26, 26, 27, 27, 27, 27, 28, 26, 24, 24, 26, 27, 26, 24, 24, 26, 28, 27, 27, 27, 27, 27, 27, 27, 27, 27, 27, 27, 26, 26, 25, 25, 25, 25, 25, 25, 28, 28, 29, 30, 30, 29, 28, 28, 28, 29, 30, 31, 32, 32, 25, 26, 28, 30, 31, 31, 32, 25, 27, 28, 28, 27, 25, 24, 23, 23, 25, 27, 29, 30, 31, 31, 31, 31, 31, 30, 30, 30, 26, 26, 27, 28, 29, 30, 31, 32, 31, 31, 31, 31, 32, 31, 29, 29, 30, 31, 31, 32, 32, 33, 33, 32, 31, 29, 28, 27, 35, 33, 31, 32, 35, 38, 38, 43, 32, 26, 22, 37, 67, 61, 64, 54, 28, 37, 26, 25, 32, 28, 24, 24, 25, 27, 28, 26, 24, 23, 22, 21, 21, 19, 16, 15, 15, 17, 23, 26, 22, 13, 13, 10, 13, 10, 22, 27, 30, 40, 35, 24, 32, 36, 25, 41, 48, 52, 37, 39, 37, 42, 29, 17, 29, 31, 19, 18, 25, 23, 18, 19, 17, 21, 20, 19, 23, 20, 20, 21, 20, 20, 21, 23, 24, 24, 22, 17, 14, 13, 17, 21, 24, 23, 36, 57, 60, 44, 28, 20, 29, 30, 26, 26, 30, 29, 25, 23, 24, 26, 28, 28, 26, 25, 23, 23, 23, 24, 25, 26, 27, 26, 27, 27, 27, 27, 26, 24, 24, 25, 26, 26, 27, 27, 26, 28, 28, 26, 25, 25, 25, 25, 25, 25, 24, 23, 24, 24, 25, 25, 25, 25, 26, 26, 27, 27, 27, 27, 28, 26, 24, 24, 26, 27, 26, 24, 24, 26, 28, 27, 27, 27, 27, 27, 27, 27, 27, 27, 27, 27, 26, 26, 25, 25, 25, 25, 25, 25, 31, 31, 31, 31, 29, 28, 27, 28, 28, 29, 29, 31, 32, 32, 24, 25, 27, 30, 30, 30, 30, 23, 27, 30, 30, 28, 28, 30, 30, 30, 30, 30, 31, 31, 31, 31, 31, 30, 30, 29, 28, 28, 25, 25, 26, 27, 27, 28, 28, 28, 29, 30, 30, 30, 30, 30, 31, 32, 33, 34, 35, 36, 36, 37, 36, 35, 34, 33, 32, 32, 38, 36, 33, 34, 36, 39, 40, 28, 27, 39, 55, 81, 93, 57, 47, 34, 20, 28, 21, 17, 21, 20, 22, 23, 21, 20, 21, 24, 16, 9, 4, 5, 9, 18, 25, 32, 40, 50, 65, 80, 95, 106, 115, 115, 133, 146, 152, 158, 138, 111, 136, 174, 167, 146, 116, 116, 141, 169, 167, 125, 100, 150, 172, 158, 124, 92, 84, 98, 111, 96, 77, 69, 43, 23, 23, 21, 20, 31, 40, 51, 68, 83, 93, 97, 102, 98, 89, 78, 69, 58, 51, 39, 28, 24, 36, 53, 53, 40, 35, 30, 21, 19, 23, 31, 37, 30, 26, 25, 26, 26, 28, 29, 24, 22, 23, 24, 24, 24, 25, 25, 27, 27, 28, 27, 26, 25, 26, 27, 28, 29, 29, 29, 28, 29, 29, 28, 28, 29, 29, 29, 30, 29, 28, 26, 25, 25, 24, 24, 25, 25, 26, 26, 27, 27, 27, 27, 28, 26, 24, 24, 26, 27, 25, 24, 24, 26, 28, 27, 27, 27, 27, 27, 27, 27, 27, 27, 27, 27, 26, 26, 25, 25, 25, 25, 25, 25, 33, 32, 31, 31, 30, 27, 26, 28, 29, 29, 31, 32, 32, 33, 26, 27, 28, 29, 29, 29, 29, 23, 28, 31, 29, 26, 26, 28, 31, 31, 30, 30, 31, 31, 31, 29, 29, 28, 28, 28, 28, 28, 27, 27, 27, 27, 29, 30, 30, 30, 30, 30, 30, 30, 30, 30, 33, 33, 34, 35, 36, 36, 37, 36, 36, 35, 35, 35, 35, 35, 32, 30, 29, 31, 32, 31, 29, 14, 29, 47, 63, 75, 59, 32, 24, 13, 23, 22, 27, 22, 22, 15, 18, 24, 23, 23, 26, 34, 47, 54, 70, 92, 115, 132, 141, 162, 178, 195, 201, 198, 194, 193, 182, 174, 175, 175, 172, 165, 149, 117, 127, 162, 178, 178, 152, 148, 144, 143, 148, 131, 126, 157, 140, 102, 128, 185, 196, 179, 186, 187, 201, 206, 185, 166, 168, 168, 165, 164, 168, 172, 176, 176, 175, 174, 169, 167, 166, 164, 162, 157, 151, 134, 129, 124, 103, 82, 72, 77, 73, 57, 33, 19, 18, 22, 24, 32, 34, 32, 30, 28, 28, 29, 26, 24, 24, 24, 24, 25, 25, 26, 27, 28, 28, 28, 27, 26, 27, 29, 30, 30, 31, 31, 31, 31, 31, 31, 30, 31, 32, 34, 34, 32, 30, 28, 26, 25, 24, 24, 25, 25, 26, 26, 27, 27, 27, 27, 28, 26, 24, 24, 26, 27, 26, 24, 24, 26, 28, 27, 27, 27, 27, 27, 27, 27, 27, 27, 27, 27, 26, 26, 25, 25, 25, 25, 25, 25, 28, 29, 29, 29, 28, 27, 26, 29, 30, 31, 32, 33, 33, 34, 29, 30, 30, 30, 29, 28, 27, 24, 30, 32, 28, 24, 23, 26, 28, 28, 28, 28, 28, 27, 27, 27, 28, 28, 28, 29, 29, 29, 28, 29, 30, 31, 32, 33, 34, 32, 32, 31, 30, 30, 30, 30, 31, 31, 31, 32, 32, 33, 33, 33, 32, 31, 31, 30, 29, 29, 18, 18, 19, 21, 20, 15, 13, 10, 21, 48, 56, 53, 45, 26, 49, 56, 53, 86, 74, 93, 107, 120, 124, 127, 133, 140, 149, 157, 162, 171, 172, 172, 173, 175, 174, 171, 163, 164, 165, 164, 161, 158, 156, 152, 157, 155, 155, 155, 152, 165, 151, 152, 153, 133, 134, 137, 151, 135, 136, 148, 150, 135, 103, 124, 158, 128, 124, 137, 131, 135, 131, 138, 162, 170, 165, 166, 165, 163, 161, 164, 164, 161, 157, 157, 161, 166, 165, 162, 160, 159, 157, 154, 163, 163, 158, 155, 151, 143, 132, 132, 121, 93, 62, 37, 21, 14, 19, 24, 25, 27, 27, 27, 27, 26, 25, 25, 25, 26, 26, 26, 26, 27, 28, 28, 29, 28, 26, 27, 29, 29, 30, 32, 32, 31, 32, 32, 31, 31, 29, 30, 30, 30, 30, 28, 26, 25, 25, 24, 25, 25, 25, 26, 26, 27, 27, 27, 27, 28, 26, 24, 24, 26, 27, 25, 24, 24, 26, 28, 27, 27, 27, 27, 27, 27, 27, 27, 27, 27, 27, 26, 26, 25, 25, 25, 25, 25, 25, 28, 29, 29, 29, 30, 29, 29, 32, 31, 31, 31, 32, 33, 35, 30, 32, 33, 33, 30, 28, 28, 29, 29, 28, 27, 27, 28, 31, 30, 30, 30, 29, 28, 26, 25, 26, 28, 29, 29, 28, 29, 31, 30, 34, 25, 34, 41, 29, 36, 32, 19, 34, 43, 31, 34, 23, 27, 23, 18, 18, 22, 24, 24, 27, 32, 30, 26, 28, 30, 28, 6, 8, 9, 4, 4, 13, 27, 56, 77, 102, 123, 140, 154, 174, 189, 186, 184, 172, 171, 171, 173, 172, 169, 165, 161, 157, 154, 152, 156, 157, 156, 157, 158, 161, 164, 161, 158, 158, 161, 163, 162, 158, 151, 153, 156, 157, 156, 152, 153, 156, 153, 155, 164, 174, 163, 142, 100, 118, 143, 171, 171, 126, 118, 140, 149, 157, 157, 151, 154, 112, 88, 166, 157, 155, 157, 161, 156, 153, 157, 163, 164, 162, 160, 160, 161, 158, 154, 156, 159, 160, 156, 154, 155, 158, 159, 158, 158, 159, 161, 161, 159, 152, 125, 78, 30, 13, 14, 17, 17, 16, 17, 20, 16, 17, 25, 27, 24, 21, 21, 27, 28, 29, 31, 29, 24, 25, 30, 26, 25, 34, 39, 35, 29, 31, 31, 26, 26, 28, 30, 29, 27, 25, 26, 28, 29, 28, 26, 27, 27, 26, 28, 29, 28, 25, 23, 25, 28, 28, 25, 24, 26, 27, 26, 24, 23, 23, 25, 26, 28, 26, 23, 24, 26, 28, 27, 27, 26, 26, 27, 28, 28, 26, 25, 25, 26, 27, 30, 30, 30, 30, 31, 31, 31, 33, 32, 31, 30, 32, 33, 35, 30, 32, 33, 32, 29, 28, 29, 32, 30, 27, 24, 24, 25, 26, 26, 27, 27, 28, 28, 27, 26, 27, 28, 30, 29, 28, 29, 31, 27, 38, 32, 24, 18, 14, 29, 40, 43, 16, 12, 14, 11, 24, 19, 21, 24, 27, 28, 27, 25, 24, 23, 19, 20, 30, 37, 35, 40, 56, 78, 99, 121, 147, 168, 180, 182, 184, 182, 175, 168, 162, 157, 157, 157, 157, 155, 153, 151, 149, 148, 148, 149, 150, 151, 150, 155, 154, 152, 152, 150, 148, 146, 150, 150, 151, 152, 153, 152, 151, 152, 152, 153, 154, 156, 158, 160, 155, 152, 150, 144, 131, 111, 95, 117, 126, 117, 133, 152, 149, 166, 169, 151, 145, 162, 164, 157, 108, 80, 159, 155, 154, 151, 151, 153, 159, 163, 163, 156, 149, 149, 153, 156, 157, 156, 158, 158, 156, 153, 150, 152, 153, 154, 153, 154, 156, 156, 157, 162, 168, 168, 160, 149, 136, 105, 61, 41, 42, 41, 31, 32, 33, 27, 21, 18, 22, 28, 29, 23, 18, 20, 23, 31, 43, 36, 27, 29, 34, 32, 24, 21, 29, 35, 35, 34, 30, 27, 27, 26, 26, 25, 26, 28, 28, 27, 28, 27, 26, 27, 29, 28, 25, 23, 25, 28, 28, 26, 25, 26, 26, 25, 25, 24, 24, 25, 25, 26, 25, 25, 24, 26, 27, 27, 27, 26, 26, 27, 29, 28, 26, 25, 26, 27, 28, 31, 31, 31, 31, 31, 31, 31, 33, 32, 31, 30, 31, 33, 35, 30, 32, 33, 31, 29, 29, 30, 30, 29, 27, 24, 24, 24, 25, 24, 26, 27, 28, 28, 28, 28, 27, 30, 31, 30, 29, 29, 31, 35, 32, 29, 27, 29, 32, 25, 15, 28, 34, 33, 27, 23, 19, 17, 16, 12, 11, 16, 26, 36, 52, 82, 115, 132, 140, 150, 161, 168, 165, 160, 156, 150, 143, 137, 126, 119, 114, 111, 112, 114, 114, 121, 123, 122, 122, 122, 121, 121, 124, 124, 123, 123, 122, 122, 122, 117, 114, 114, 117, 121, 120, 114, 114, 118, 123, 124, 122, 120, 121, 121, 120, 120, 120, 122, 126, 129, 123, 105, 85, 83, 97, 114, 122, 102, 91, 74, 79, 89, 81, 85, 88, 74, 78, 104, 98, 92, 75, 76, 121, 109, 115, 120, 113, 109, 107, 110, 114, 116, 117, 119, 122, 124, 124, 125, 130, 135, 138, 137, 140, 143, 145, 147, 148, 151, 154, 150, 149, 151, 151, 153, 160, 170, 162, 163, 170, 166, 157, 150, 148, 154, 146, 127, 109, 90, 68, 47, 25, 17, 17, 20, 21, 18, 19, 25, 24, 22, 24, 25, 23, 24, 20, 22, 27, 30, 28, 29, 31, 30, 27, 25, 24, 27, 28, 28, 28, 27, 27, 27, 28, 27, 26, 25, 26, 27, 27, 26, 25, 25, 24, 24, 25, 27, 26, 25, 24, 22, 24, 28, 28, 26, 26, 26, 27, 26, 26, 27, 29, 28, 26, 25, 26, 27, 28, 31, 31, 31, 31, 32, 32, 32, 33, 32, 31, 30, 32, 33, 35, 30, 31, 32, 31, 29, 30, 32, 28, 28, 28, 27, 27, 28, 29, 29, 29, 30, 30, 30, 29, 28, 29, 31, 32, 30, 29, 29, 31, 36, 32, 30, 23, 23, 31, 29, 24, 16, 17, 13, 10, 16, 43, 58, 73, 80, 90, 106, 130, 160, 183, 197, 193, 188, 182, 167, 141, 117, 111, 107, 102, 102, 106, 113, 119, 118, 118, 118, 116, 117, 124, 133, 132, 128, 122, 116, 115, 117, 119, 119, 118, 118, 121, 122, 123, 124, 118, 115, 113, 117, 120, 117, 111, 109, 114, 122, 123, 122, 122, 123, 125, 125, 121, 117, 112, 108, 105, 109, 107, 106, 109, 111, 105, 95, 90, 101, 108, 103, 97, 96, 109, 110, 93, 75, 78, 75, 89, 92, 92, 98, 80, 80, 88, 78, 71, 70, 69, 70, 80, 90, 91, 86, 70, 60, 59, 74, 95, 108, 110, 117, 120, 120, 119, 117, 117, 119, 131, 139, 146, 150, 152, 153, 155, 154, 152, 150, 150, 153, 160, 166, 163, 156, 158, 175, 190, 179, 153, 135, 112, 70, 30, 13, 10, 11, 17, 22, 24, 22, 20, 22, 26, 30, 30, 28, 26, 26, 28, 29, 28, 28, 27, 24, 24, 26, 28, 29, 28, 27, 27, 27, 26, 27, 27, 28, 27, 26, 26, 26, 26, 25, 24, 24, 25, 27, 27, 25, 24, 22, 24, 28, 29, 26, 25, 27, 27, 26, 26, 27, 29, 28, 26, 25, 25, 27, 28, 30, 30, 30, 30, 31, 31, 31, 33, 32, 30, 30, 32, 33, 35, 30, 31, 31, 30, 29, 30, 33, 26, 27, 28, 28, 29, 30, 30, 29, 30, 30, 31, 31, 29, 29, 30, 32, 32, 31, 29, 30, 31, 34, 31, 29, 32, 28, 16, 14, 33, 45, 37, 73, 127, 140, 173, 187, 189, 191, 189, 183, 177, 172, 144, 124, 104, 91, 82, 77, 78, 85, 92, 99, 98, 89, 75, 65, 51, 56, 59, 56, 47, 42, 42, 39, 39, 41, 41, 40, 39, 37, 37, 38, 37, 36, 35, 35, 35, 41, 40, 41, 45, 48, 49, 47, 47, 49, 52, 55, 57, 56, 57, 58, 62, 70, 78, 84, 87, 88, 82, 89, 96, 91, 83, 83, 91, 100, 96, 90, 91, 100, 102, 92, 100, 111, 111, 108, 94, 101, 103, 96, 97, 103, 96, 102, 103, 115, 122, 116, 105, 102, 104, 104, 100, 106, 101, 92, 92, 96, 96, 90, 90, 92, 93, 95, 96, 101, 105, 105, 106, 111, 113, 115, 118, 120, 126, 127, 128, 134, 140, 140, 137, 137, 146, 161, 163, 158, 159, 168, 181, 185, 178, 158, 130, 93, 58, 39, 31, 27, 17, 12, 13, 15, 21, 22, 19, 21, 26, 29, 29, 28, 26, 25, 26, 28, 29, 28, 26, 26, 28, 27, 26, 26, 29, 30, 28, 25, 24, 25, 25, 24, 24, 25, 25, 25, 25, 25, 25, 24, 25, 26, 26, 26, 26, 26, 27, 26, 26, 27, 29, 28, 26, 25, 25, 27, 28, 29, 29, 29, 30, 30, 30, 30, 33, 32, 30, 30, 31, 33, 35, 30, 31, 30, 29, 29, 31, 34, 27, 27, 27, 27, 27, 26, 26, 25, 26, 27, 29, 31, 31, 30, 31, 33, 33, 31, 29, 30, 31, 27, 32, 24, 32, 50, 80, 146, 163, 126, 112, 148, 185, 175, 168, 147, 135, 122, 110, 102, 95, 89, 85, 70, 57, 53, 48, 43, 44, 48, 45, 40, 37, 38, 39, 39, 46, 47, 49, 52, 55, 58, 60, 55, 55, 54, 54, 53, 52, 51, 51, 52, 52, 53, 53, 54, 54, 56, 56, 54, 53, 50, 49, 50, 49, 46, 45, 46, 48, 47, 45, 44, 45, 45, 46, 44, 40, 38, 39, 40, 41, 41, 40, 39, 37, 36, 35, 39, 36, 37, 44, 39, 34, 30, 27, 42, 37, 34, 30, 35, 31, 43, 28, 34, 33, 36, 35, 37, 38, 37, 36, 36, 39, 39, 43, 49, 53, 56, 58, 60, 65, 68, 70, 72, 74, 78, 84, 88, 94, 100, 104, 107, 115, 126, 124, 123, 124, 123, 117, 110, 104, 103, 102, 99, 94, 95, 107, 123, 125, 128, 135, 142, 154, 163, 159, 153, 148, 128, 91, 55, 32, 18, 17, 21, 25, 26, 25, 24, 26, 26, 25, 26, 27, 30, 29, 26, 25, 26, 28, 26, 24, 26, 29, 32, 29, 25, 24, 25, 26, 24, 25, 26, 25, 23, 23, 25, 26, 28, 26, 23, 23, 26, 28, 27, 26, 26, 26, 27, 29, 28, 26, 25, 26, 27, 28, 33, 34, 34, 34, 33, 32, 31, 28, 28, 29, 29, 31, 30, 30, 30, 30, 30, 30, 31, 31, 31, 32, 31, 31, 33, 34, 32, 30, 27, 28, 31, 32, 32, 34, 36, 30, 39, 32, 26, 34, 29, 29, 13, 22, 39, 95, 164, 197, 164, 120, 162, 182, 186, 179, 140, 104, 94, 86, 82, 81, 71, 52, 37, 33, 31, 28, 29, 33, 39, 46, 47, 53, 59, 61, 62, 67, 72, 70, 66, 61, 61, 64, 66, 67, 68, 67, 66, 66, 67, 67, 68, 66, 65, 63, 64, 66, 66, 66, 64, 64, 66, 66, 66, 64, 63, 66, 69, 70, 67, 63, 61, 60, 61, 63, 64, 62, 60, 60, 63, 59, 56, 54, 53, 54, 56, 58, 55, 55, 57, 58, 57, 54, 52, 47, 52, 59, 60, 56, 49, 45, 49, 55, 58, 54, 49, 50, 57, 57, 55, 51, 45, 40, 38, 39, 38, 33, 25, 23, 26, 27, 25, 24, 24, 22, 24, 26, 26, 25, 31, 34, 34, 38, 47, 57, 64, 70, 80, 96, 109, 120, 133, 146, 150, 137, 121, 117, 118, 107, 87, 82, 86, 93, 104, 117, 129, 137, 148, 155, 165, 180, 172, 127, 69, 25, 13, 10, 6, 13, 21, 13, 6, 17, 32, 32, 15, 18, 35, 35, 30, 25, 20, 22, 30, 34, 31, 27, 24, 24, 24, 24, 25, 26, 27, 26, 25, 24, 24, 26, 27, 29, 27, 25, 25, 27, 28, 27, 27, 28, 28, 28, 28, 28, 28, 27, 26, 26, 26, 34, 35, 35, 36, 35, 34, 33, 28, 28, 29, 30, 31, 30, 29, 30, 30, 30, 30, 31, 31, 31, 32, 31, 31, 33, 34, 32, 30, 27, 29, 32, 32, 32, 34, 36, 26, 38, 31, 24, 37, 36, 38, 8, 56, 106, 151, 157, 145, 135, 173, 182, 167, 131, 103, 97, 103, 93, 69, 45, 36, 34, 32, 33, 41, 44, 48, 54, 60, 66, 69, 68, 71, 73, 69, 64, 64, 67, 67, 63, 59, 58, 60, 62, 63, 67, 67, 67, 67, 68, 70, 70, 70, 68, 66, 65, 66, 65, 64, 64, 65, 66, 66, 65, 64, 64, 61, 64, 67, 69, 69, 71, 72, 71, 71, 69, 66, 62, 62, 64, 67, 67, 65, 65, 66, 67, 69, 66, 66, 68, 68, 67, 65, 63, 62, 67, 71, 71, 68, 63, 60, 62, 64, 66, 68, 68, 66, 64, 60, 60, 62, 64, 66, 68, 70, 73, 70, 63, 61, 61, 60, 57, 52, 48, 45, 43, 42, 39, 36, 37, 36, 33, 31, 29, 28, 27, 27, 30, 36, 39, 40, 42, 44, 48, 60, 77, 88, 93, 101, 112, 115, 113, 109, 104, 101, 99, 98, 95, 109, 127, 136, 157, 178, 173, 140, 90, 59, 42, 19, 27, 29, 20, 22, 28, 29, 26, 25, 26, 28, 30, 31, 31, 30, 30, 27, 26, 25, 24, 24, 25, 26, 27, 28, 27, 26, 24, 25, 26, 27, 28, 28, 25, 25, 27, 28, 28, 27, 28, 28, 28, 28, 28, 28, 27, 26, 26, 26, 32, 32, 33, 33, 32, 31, 31, 30, 29, 30, 30, 31, 31, 30, 30, 30, 30, 30, 31, 31, 31, 32, 31, 31, 33, 34, 33, 30, 29, 30, 33, 33, 33, 34, 36, 33, 33, 31, 25, 25, 18, 29, 53, 142, 161, 157, 161, 161, 156, 130, 105, 97, 87, 71, 64, 53, 36, 36, 44, 57, 62, 58, 54, 64, 67, 68, 69, 69, 68, 67, 61, 62, 65, 64, 62, 65, 67, 64, 61, 58, 58, 58, 59, 59, 62, 63, 63, 64, 66, 68, 69, 70, 67, 65, 64, 65, 65, 63, 66, 67, 67, 67, 65, 64, 63, 62, 64, 64, 61, 58, 55, 54, 56, 55, 54, 52, 53, 56, 59, 64, 65, 63, 63, 64, 65, 67, 66, 66, 68, 68, 67, 65, 63, 63, 65, 66, 65, 63, 61, 60, 65, 66, 64, 63, 61, 56, 49, 48, 49, 50, 54, 59, 64, 67, 68, 66, 64, 65, 69, 70, 68, 65, 63, 63, 65, 68, 69, 69, 68, 68, 68, 65, 59, 54, 50, 51, 47, 36, 28, 26, 28, 31, 33, 33, 30, 26, 26, 33, 43, 49, 52, 56, 63, 71, 80, 86, 94, 88, 83, 98, 114, 117, 118, 129, 139, 132, 116, 96, 56, 26, 26, 19, 15, 29, 33, 25, 27, 28, 26, 30, 31, 29, 27, 27, 26, 26, 26, 26, 26, 27, 28, 28, 28, 27, 25, 25, 26, 27, 28, 28, 25, 25, 27, 28, 28, 27, 28, 28, 28, 28, 28, 28, 27, 26, 26, 26, 30, 30, 31, 31, 31, 30, 30, 30, 30, 31, 31, 31, 31, 30, 30, 30, 30, 30, 31, 31, 31, 32, 31, 31, 33, 34, 32, 30, 30, 31, 33, 33, 32, 34, 36, 44, 22, 25, 27, 25, 32, 80, 106, 189, 189, 147, 108, 90, 91, 87, 58, 49, 38, 26, 39, 52, 60, 65, 72, 75, 69, 63, 63, 67, 66, 64, 63, 63, 64, 64, 63, 63, 62, 61, 60, 59, 59, 62, 61, 58, 58, 60, 60, 59, 57, 57, 58, 59, 61, 63, 64, 64, 63, 61, 61, 64, 65, 64, 64, 65, 65, 64, 63, 61, 61, 59, 61, 62, 59, 56, 55, 55, 60, 59, 55, 52, 52, 52, 52, 56, 57, 57, 57, 58, 57, 58, 62, 64, 64, 63, 62, 62, 61, 59, 59, 57, 56, 56, 55, 53, 56, 58, 59, 56, 53, 54, 56, 55, 52, 48, 49, 53, 59, 62, 65, 65, 64, 63, 63, 61, 59, 64, 64, 63, 63, 64, 64, 62, 63, 66, 71, 71, 69, 67, 67, 72, 69, 57, 50, 49, 53, 57, 64, 68, 67, 67, 63, 55, 48, 44, 41, 36, 29, 24, 20, 18, 15, 33, 53, 54, 67, 95, 109, 105, 88, 102, 117, 109, 134, 146, 104, 53, 18, 17, 26, 22, 22, 28, 28, 26, 25, 27, 29, 28, 27, 27, 26, 26, 27, 28, 29, 30, 29, 27, 26, 25, 26, 27, 28, 28, 25, 25, 27, 28, 28, 28, 28, 28, 28, 28, 28, 28, 27, 26, 26, 26, 31, 32, 33, 33, 32, 31, 30, 31, 31, 32, 31, 31, 30, 30, 30, 30, 30, 30, 31, 31, 31, 32, 31, 31, 33, 34, 32, 30, 31, 32, 34, 33, 32, 33, 34, 36, 22, 33, 31, 26, 41, 101, 120, 174, 152, 108, 95, 91, 58, 45, 38, 39, 49, 57, 62, 65, 70, 68, 69, 69, 64, 61, 63, 68, 66, 61, 57, 56, 56, 58, 58, 58, 58, 58, 58, 57, 58, 60, 58, 58, 59, 61, 61, 60, 57, 57, 57, 58, 59, 62, 63, 63, 62, 60, 61, 62, 63, 63, 63, 63, 63, 63, 61, 59, 58, 59, 60, 61, 59, 55, 54, 53, 57, 55, 55, 56, 59, 59, 57, 55, 55, 56, 56, 56, 57, 57, 63, 65, 64, 63, 62, 63, 62, 62, 61, 57, 57, 58, 57, 54, 56, 58, 57, 55, 54, 54, 55, 55, 51, 47, 48, 53, 57, 57, 57, 59, 61, 63, 63, 62, 61, 57, 56, 55, 57, 59, 60, 59, 54, 54, 57, 56, 54, 55, 60, 61, 63, 65, 63, 60, 58, 57, 64, 72, 76, 72, 67, 69, 78, 75, 70, 66, 60, 55, 52, 51, 45, 32, 21, 24, 27, 30, 38, 59, 79, 88, 93, 102, 110, 114, 117, 101, 67, 38, 26, 22, 20, 26, 31, 29, 27, 27, 28, 28, 28, 28, 27, 27, 28, 29, 30, 31, 30, 28, 26, 26, 26, 27, 28, 27, 25, 25, 27, 28, 27, 27, 28, 28, 28, 28, 28, 28, 27, 26, 26, 26, 28, 29, 30, 30, 30, 29, 28, 32, 32, 32, 32, 31, 30, 30, 30, 30, 30, 30, 31, 31, 31, 32, 31, 31, 33, 34, 32, 30, 31, 33, 34, 33, 31, 32, 33, 32, 28, 30, 16, 37, 93, 174, 99, 105, 88, 66, 49, 55, 47, 38, 62, 66, 65, 65, 63, 77, 83, 71, 63, 65, 67, 63, 60, 63, 62, 59, 57, 56, 56, 56, 61, 59, 58, 58, 58, 57, 56, 56, 55, 55, 58, 60, 61, 60, 61, 62, 62, 62, 63, 64, 65, 67, 65, 62, 62, 63, 62, 61, 62, 62, 62, 61, 59, 57, 55, 57, 59, 61, 60, 58, 58, 58, 59, 57, 57, 60, 61, 58, 54, 51, 51, 52, 53, 53, 53, 53, 59, 61, 60, 59, 58, 59, 59, 56, 55, 53, 53, 54, 53, 48, 51, 49, 49, 56, 64, 64, 58, 56, 53, 51, 54, 58, 57, 52, 51, 54, 57, 57, 54, 51, 49, 53, 54, 53, 55, 58, 59, 58, 56, 57, 57, 52, 48, 51, 58, 57, 58, 64, 63, 59, 59, 63, 70, 72, 71, 68, 65, 62, 60, 66, 68, 65, 62, 60, 59, 59, 60, 65, 69, 62, 57, 54, 50, 39, 28, 35, 37, 32, 60, 76, 89, 114, 121, 89, 55, 39, 26, 17, 20, 28, 30, 25, 24, 29, 30, 29, 28, 28, 28, 29, 30, 31, 31, 29, 27, 26, 26, 27, 28, 28, 25, 25, 27, 28, 28, 27, 28, 28, 28, 28, 28, 28, 27, 26, 26, 26, 33, 32, 30, 28, 27, 27, 27, 28, 27, 27, 30, 32, 32, 31, 30, 29, 28, 30, 33, 32, 31, 32, 31, 31, 33, 34, 33, 30, 32, 29, 33, 31, 36, 39, 14, 19, 48, 23, 43, 124, 173, 141, 70, 73, 62, 43, 39, 53, 66, 67, 62, 58, 60, 65, 68, 68, 68, 66, 65, 63, 62, 60, 59, 61, 60, 60, 59, 60, 60, 61, 61, 59, 56, 56, 59, 63, 67, 67, 66, 64, 63, 63, 65, 66, 64, 63, 63, 63, 63, 64, 64, 64, 64, 63, 62, 61, 60, 59, 59, 58, 59, 61, 58, 58, 62, 63, 59, 58, 62, 63, 61, 62, 65, 65, 65, 63, 61, 59, 57, 53, 50, 49, 50, 51, 50, 49, 50, 52, 54, 54, 54, 56, 57, 56, 55, 55, 53, 52, 51, 50, 47, 49, 51, 52, 57, 61, 58, 57, 61, 61, 54, 50, 48, 45, 43, 43, 45, 48, 52, 54, 55, 54, 50, 47, 51, 58, 62, 62, 59, 57, 55, 54, 54, 53, 50, 50, 55, 62, 65, 63, 63, 64, 67, 67, 65, 61, 60, 59, 59, 59, 58, 57, 58, 61, 62, 62, 67, 70, 72, 74, 75, 74, 73, 69, 64, 56, 51, 47, 38, 27, 32, 46, 64, 80, 87, 75, 52, 35, 27, 24, 26, 27, 26, 29, 33, 30, 23, 20, 25, 28, 26, 26, 28, 27, 26, 26, 26, 26, 27, 27, 27, 27, 27, 27, 28, 26, 24, 23, 25, 29, 31, 30, 28, 27, 27, 26, 28, 27, 27, 26, 27, 27, 29, 28, 27, 27, 30, 32, 32, 31, 30, 29, 28, 30, 32, 32, 31, 32, 31, 31, 33, 34, 32, 30, 33, 30, 32, 33, 28, 23, 23, 25, 22, 75, 143, 155, 138, 88, 48, 34, 33, 50, 62, 64, 65, 58, 55, 52, 54, 57, 61, 61, 66, 66, 65, 64, 64, 63, 63, 64, 63, 63, 62, 62, 63, 63, 60, 58, 56, 55, 55, 56, 59, 60, 60, 60, 60, 60, 61, 62, 60, 60, 60, 60, 60, 60, 60, 60, 61, 61, 62, 63, 64, 64, 63, 61, 62, 63, 60, 59, 63, 65, 61, 60, 65, 65, 64, 64, 63, 63, 64, 65, 65, 64, 64, 62, 59, 56, 55, 55, 52, 50, 51, 52, 54, 54, 54, 55, 55, 57, 58, 58, 58, 58, 58, 57, 52, 54, 55, 55, 58, 62, 59, 57, 61, 62, 57, 55, 55, 53, 53, 53, 53, 54, 55, 56, 56, 57, 54, 51, 52, 57, 59, 57, 59, 60, 58, 58, 60, 59, 58, 57, 60, 65, 67, 66, 66, 67, 63, 60, 57, 55, 53, 53, 53, 54, 54, 53, 53, 56, 57, 56, 59, 62, 63, 64, 65, 66, 67, 69, 73, 75, 75, 68, 59, 51, 43, 36, 29, 31, 51, 74, 88, 77, 52, 30, 24, 26, 25, 20, 19, 24, 29, 30, 26, 24, 26, 29, 28, 27, 26, 26, 26, 26, 26, 26, 27, 28, 29, 30, 31, 31, 29, 27, 26, 27, 27, 25, 24, 25, 24, 24, 35, 33, 31, 29, 27, 27, 27, 28, 27, 27, 30, 32, 32, 31, 30, 29, 28, 30, 32, 32, 31, 32, 31, 31, 33, 34, 32, 30, 20, 39, 35, 33, 34, 27, 31, 86, 132, 149, 147, 100, 50, 46, 41, 43, 53, 62, 60, 57, 60, 57, 54, 52, 51, 53, 54, 55, 63, 63, 63, 63, 64, 64, 65, 65, 65, 64, 63, 63, 65, 65, 59, 59, 59, 59, 60, 61, 63, 64, 65, 65, 63, 61, 60, 59, 61, 61, 61, 61, 61, 61, 61, 61, 62, 62, 64, 66, 67, 68, 66, 64, 64, 64, 61, 60, 64, 66, 61, 61, 65, 66, 64, 65, 63, 64, 65, 67, 68, 68, 68, 66, 63, 62, 60, 60, 57, 54, 56, 56, 55, 55, 55, 56, 54, 56, 59, 60, 61, 63, 63, 62, 58, 59, 59, 57, 60, 62, 58, 57, 61, 63, 59, 58, 58, 57, 57, 58, 58, 58, 56, 55, 56, 57, 55, 53, 54, 58, 60, 60, 56, 53, 51, 52, 54, 54, 52, 50, 51, 55, 58, 61, 64, 65, 61, 57, 55, 53, 52, 52, 52, 53, 53, 52, 54, 58, 60, 61, 62, 61, 61, 61, 62, 65, 66, 66, 60, 55, 61, 73, 76, 71, 67, 64, 53, 42, 42, 45, 43, 53, 60, 56, 45, 33, 25, 25, 34, 32, 22, 22, 27, 27, 24, 26, 28, 27, 26, 26, 26, 26, 26, 26, 27, 28, 28, 29, 29, 29, 29, 28, 27, 27, 26, 24, 25, 25, 25, 25, 32, 31, 29, 29, 28, 28, 28, 27, 27, 27, 30, 32, 32, 31, 30, 29, 28, 30, 33, 32, 31, 32, 31, 31, 33, 34, 32, 30, 26, 31, 26, 24, 30, 63, 125, 201, 166, 96, 61, 51, 49, 43, 50, 67, 71, 59, 52, 51, 51, 48, 48, 49, 50, 52, 55, 57, 60, 60, 61, 63, 63, 64, 65, 65, 64, 64, 63, 63, 64, 65, 64, 63, 62, 62, 63, 64, 64, 63, 64, 64, 64, 64, 64, 63, 64, 65, 65, 65, 65, 66, 66, 66, 67, 67, 67, 67, 67, 67, 67, 65, 65, 66, 63, 62, 65, 66, 61, 61, 65, 65, 64, 65, 66, 67, 68, 68, 68, 68, 68, 65, 63, 61, 61, 62, 62, 60, 63, 61, 58, 58, 59, 58, 55, 54, 57, 60, 62, 64, 63, 62, 60, 62, 62, 60, 62, 64, 60, 59, 64, 64, 60, 57, 57, 55, 54, 56, 58, 57, 55, 55, 57, 57, 55, 53, 53, 54, 55, 56, 56, 55, 53, 53, 53, 52, 51, 49, 50, 50, 51, 55, 58, 59, 61, 61, 59, 58, 57, 59, 59, 61, 61, 58, 58, 60, 61, 60, 60, 60, 59, 59, 59, 61, 62, 62, 66, 71, 69, 60, 57, 62, 66, 69, 71, 68, 64, 55, 41, 35, 46, 65, 74, 64, 42, 20, 25, 30, 24, 28, 29, 25, 24, 27, 28, 27, 26, 26, 26, 26, 27, 28, 27, 26, 25, 24, 24, 23, 24, 26, 27, 27, 28, 30, 30, 29, 29, 29, 28, 27, 27, 27, 28, 29, 29, 27, 27, 27, 30, 32, 33, 32, 30, 29, 28, 30, 33, 32, 31, 32, 31, 31, 33, 34, 33, 30, 25, 23, 29, 39, 62, 107, 149, 156, 106, 68, 45, 26, 47, 49, 57, 60, 56, 52, 51, 52, 47, 44, 46, 50, 51, 53, 57, 61, 62, 63, 63, 65, 65, 66, 67, 67, 66, 65, 65, 65, 66, 67, 68, 66, 63, 61, 62, 64, 66, 65, 65, 63, 63, 63, 64, 65, 64, 64, 65, 65, 65, 65, 65, 66, 66, 67, 67, 66, 66, 65, 66, 64, 65, 66, 64, 63, 66, 67, 63, 63, 67, 67, 65, 66, 67, 68, 68, 69, 69, 68, 67, 65, 64, 63, 64, 66, 66, 64, 66, 63, 60, 59, 60, 58, 53, 53, 57, 60, 62, 64, 63, 61, 61, 63, 63, 61, 64, 65, 62, 60, 65, 66, 61, 58, 58, 56, 53, 56, 58, 57, 53, 53, 57, 57, 56, 55, 53, 52, 53, 54, 58, 59, 57, 57, 58, 58, 57, 58, 56, 52, 53, 55, 58, 58, 62, 63, 62, 61, 61, 62, 64, 65, 64, 62, 60, 61, 60, 59, 59, 60, 60, 60, 59, 58, 57, 54, 53, 56, 63, 69, 68, 63, 61, 63, 63, 60, 62, 66, 66, 46, 34, 38, 52, 71, 69, 44, 27, 24, 30, 38, 31, 22, 24, 28, 28, 27, 26, 26, 26, 26, 27, 27, 27, 26, 26, 24, 23, 24, 26, 28, 28, 26, 26, 28, 29, 29, 29, 29, 34, 33, 31, 30, 29, 28, 28, 27, 27, 27, 30, 32, 33, 32, 30, 29, 28, 30, 32, 32, 31, 32, 31, 31, 32, 33, 32, 31, 28, 29, 28, 49, 125, 174, 133, 95, 74, 30, 39, 57, 58, 64, 58, 50, 49, 52, 47, 44, 50, 53, 55, 57, 56, 55, 56, 59, 65, 66, 66, 67, 67, 67, 67, 68, 67, 67, 67, 67, 68, 68, 66, 64, 63, 63, 66, 70, 73, 76, 74, 68, 64, 61, 60, 60, 61, 61, 61, 62, 62, 62, 63, 63, 64, 64, 65, 65, 65, 65, 65, 63, 64, 65, 64, 64, 68, 69, 65, 65, 69, 70, 68, 69, 65, 65, 66, 69, 70, 70, 69, 68, 67, 65, 67, 67, 66, 66, 68, 64, 61, 58, 60, 57, 52, 52, 56, 60, 63, 65, 63, 61, 60, 63, 64, 62, 65, 65, 62, 62, 66, 66, 62, 60, 61, 59, 56, 58, 60, 57, 53, 52, 56, 57, 56, 56, 56, 56, 58, 62, 58, 54, 53, 55, 57, 59, 58, 58, 56, 52, 52, 56, 60, 61, 63, 63, 61, 61, 62, 63, 65, 64, 63, 62, 63, 66, 68, 68, 67, 68, 68, 68, 66, 63, 60, 61, 67, 69, 64, 55, 55, 62, 60, 57, 54, 49, 51, 58, 61, 71, 65, 38, 30, 52, 76, 82, 61, 34, 21, 27, 32, 26, 23, 27, 28, 27, 26, 26, 26, 27, 27, 27, 27, 27, 27, 27, 27, 28, 31, 31, 29, 25, 22, 23, 25, 26, 26, 27, 35, 34, 33, 31, 30, 30, 30, 31, 30, 29, 30, 32, 31, 30, 29, 30, 29, 30, 29, 30, 30, 33, 36, 34, 27, 25, 29, 33, 25, 21, 55, 94, 114, 109, 75, 44, 42, 45, 54, 60, 58, 52, 50, 48, 47, 47, 48, 50, 51, 50, 52, 54, 56, 58, 60, 61, 61, 63, 64, 63, 63, 63, 65, 63, 65, 68, 68, 66, 65, 64, 64, 64, 65, 65, 64, 63, 62, 63, 64, 65, 66, 66, 65, 65, 71, 68, 64, 62, 63, 64, 63, 68, 68, 68, 67, 67, 67, 66, 66, 65, 65, 64, 64, 65, 65, 66, 66, 68, 69, 70, 70, 72, 63, 63, 68, 81, 81, 80, 87, 108, 133, 126, 139, 123, 89, 66, 55, 69, 83, 64, 62, 56, 59, 48, 52, 60, 65, 67, 67, 63, 63, 65, 71, 73, 66, 60, 64, 71, 71, 65, 59, 56, 57, 60, 62, 63, 59, 55, 61, 67, 66, 64, 60, 58, 58, 55, 55, 63, 67, 58, 57, 60, 57, 61, 61, 56, 63, 60, 52, 53, 55, 60, 63, 60, 58, 58, 59, 60, 61, 61, 61, 60, 61, 63, 65, 65, 63, 59, 55, 57, 63, 65, 62, 62, 61, 64, 63, 58, 67, 70, 64, 63, 57, 47, 44, 47, 50, 54, 55, 56, 57, 48, 45, 61, 79, 71, 36, 12, 25, 32, 30, 31, 32, 29, 27, 29, 33, 33, 31, 30, 30, 30, 27, 26, 23, 25, 27, 27, 27, 26, 26, 26, 25, 26, 27, 28, 29, 28, 28, 29, 29, 31, 32, 32, 30, 29, 31, 32, 32, 30, 30, 30, 29, 29, 29, 30, 31, 36, 35, 32, 29, 26, 25, 25, 14, 27, 69, 97, 94, 72, 44, 26, 42, 54, 58, 58, 56, 49, 51, 49, 48, 48, 50, 53, 56, 57, 57, 58, 58, 59, 58, 58, 61, 64, 64, 63, 62, 62, 64, 69, 70, 71, 69, 67, 66, 67, 66, 65, 65, 65, 65, 66, 66, 65, 66, 67, 68, 69, 68, 68, 73, 71, 66, 65, 65, 66, 65, 64, 65, 66, 67, 69, 70, 70, 69, 69, 67, 67, 67, 67, 67, 68, 69, 68, 66, 65, 64, 63, 66, 66, 63, 89, 66, 93, 156, 196, 239, 190, 211, 188, 189, 161, 72, 33, 58, 87, 68, 62, 66, 57, 66, 72, 62, 59, 64, 67, 67, 65, 63, 65, 63, 63, 66, 68, 60, 53, 58, 71, 75, 71, 61, 60, 63, 64, 67, 68, 63, 63, 60, 59, 58, 55, 55, 59, 62, 56, 57, 59, 57, 62, 61, 57, 64, 62, 54, 57, 58, 62, 66, 64, 64, 63, 62, 62, 62, 61, 60, 60, 60, 61, 63, 64, 64, 61, 58, 59, 64, 66, 64, 64, 61, 62, 64, 62, 69, 66, 59, 61, 62, 54, 47, 43, 38, 40, 50, 64, 71, 61, 42, 28, 50, 90, 82, 26, 11, 28, 28, 26, 33, 35, 30, 28, 33, 32, 28, 28, 28, 28, 27, 26, 25, 28, 31, 31, 30, 28, 27, 27, 26, 25, 27, 28, 33, 32, 31, 30, 30, 30, 30, 32, 30, 29, 31, 33, 32, 31, 32, 31, 29, 29, 29, 31, 32, 35, 31, 32, 34, 32, 29, 29, 23, 42, 76, 95, 84, 57, 37, 33, 49, 55, 52, 53, 52, 44, 50, 48, 46, 46, 49, 53, 56, 57, 58, 58, 58, 58, 58, 57, 63, 64, 64, 62, 60, 59, 60, 65, 66, 66, 65, 65, 67, 69, 66, 66, 65, 64, 65, 67, 69, 69, 69, 68, 67, 65, 63, 62, 66, 65, 62, 62, 65, 67, 68, 63, 62, 64, 65, 67, 68, 69, 68, 67, 66, 66, 66, 67, 68, 68, 70, 67, 63, 62, 61, 58, 61, 76, 73, 62, 67, 155, 211, 186, 202, 176, 177, 147, 184, 218, 197, 152, 108, 61, 79, 77, 74, 53, 65, 75, 66, 65, 70, 67, 62, 60, 60, 62, 63, 58, 53, 56, 64, 70, 66, 60, 60, 65, 72, 71, 67, 65, 65, 67, 70, 65, 61, 59, 58, 56, 56, 57, 58, 56, 59, 59, 56, 63, 63, 59, 66, 64, 56, 59, 58, 59, 61, 64, 66, 66, 65, 64, 64, 63, 62, 63, 62, 61, 62, 64, 64, 62, 59, 61, 63, 64, 63, 65, 61, 62, 65, 64, 69, 62, 55, 60, 65, 62, 57, 52, 46, 42, 42, 46, 58, 71, 66, 41, 26, 57, 92, 84, 51, 25, 24, 33, 32, 29, 31, 33, 30, 30, 29, 27, 28, 28, 29, 28, 28, 31, 33, 32, 31, 29, 27, 26, 25, 26, 27, 28, 31, 30, 29, 29, 30, 30, 31, 32, 31, 30, 32, 34, 33, 31, 33, 32, 30, 29, 30, 31, 33, 35, 31, 33, 36, 32, 28, 30, 46, 77, 90, 76, 55, 43, 49, 59, 56, 50, 47, 49, 48, 43, 49, 48, 47, 47, 49, 52, 54, 54, 54, 56, 57, 58, 59, 59, 60, 63, 64, 64, 64, 65, 67, 66, 67, 67, 65, 64, 65, 66, 66, 65, 65, 65, 65, 66, 67, 67, 67, 67, 68, 67, 66, 65, 70, 67, 63, 62, 64, 65, 66, 64, 64, 64, 64, 64, 64, 64, 64, 64, 64, 64, 65, 66, 67, 67, 71, 69, 63, 63, 64, 60, 67, 75, 72, 50, 103, 186, 195, 146, 170, 190, 163, 162, 192, 187, 177, 206, 187, 104, 71, 66, 74, 66, 68, 67, 63, 67, 71, 68, 61, 60, 58, 58, 63, 65, 62, 75, 75, 67, 62, 62, 65, 67, 75, 77, 75, 73, 68, 63, 63, 61, 61, 60, 59, 59, 60, 58, 57, 58, 64, 61, 57, 65, 64, 60, 67, 64, 58, 60, 56, 54, 55, 59, 65, 67, 65, 64, 65, 65, 66, 67, 65, 62, 62, 64, 64, 62, 61, 60, 61, 62, 62, 65, 63, 64, 64, 64, 67, 61, 57, 64, 67, 63, 60, 58, 53, 47, 45, 43, 43, 49, 59, 64, 55, 39, 49, 91, 88, 36, 21, 36, 28, 21, 31, 35, 27, 29, 30, 27, 28, 29, 29, 29, 28, 30, 31, 30, 28, 27, 26, 25, 25, 25, 27, 28, 31, 30, 29, 29, 30, 31, 31, 33, 32, 30, 32, 34, 33, 32, 34, 32, 30, 29, 29, 32, 34, 35, 31, 35, 36, 30, 27, 34, 71, 102, 85, 46, 33, 41, 62, 67, 53, 49, 53, 51, 48, 50, 52, 53, 54, 55, 55, 56, 57, 55, 56, 56, 58, 59, 60, 60, 63, 65, 64, 61, 59, 58, 58, 57, 61, 63, 65, 66, 66, 67, 64, 65, 65, 65, 64, 64, 63, 63, 64, 66, 67, 68, 68, 68, 72, 69, 64, 62, 63, 63, 62, 64, 65, 65, 65, 65, 65, 65, 63, 63, 64, 65, 68, 71, 72, 71, 76, 75, 67, 68, 70, 65, 80, 82, 55, 57, 158, 200, 196, 203, 205, 175, 178, 165, 174, 203, 207, 173, 211, 211, 112, 74, 78, 81, 73, 68, 70, 70, 68, 68, 61, 61, 61, 61, 67, 74, 75, 59, 51, 45, 38, 37, 40, 46, 50, 56, 66, 76, 74, 68, 67, 63, 62, 62, 60, 64, 65, 60, 58, 62, 68, 63, 58, 66, 64, 60, 67, 64, 59, 64, 60, 56, 55, 59, 67, 69, 66, 64, 64, 64, 66, 69, 66, 61, 60, 64, 64, 64, 64, 63, 62, 62, 63, 65, 64, 66, 66, 61, 64, 61, 61, 67, 69, 65, 62, 60, 57, 51, 46, 44, 43, 38, 42, 58, 71, 52, 27, 50, 80, 61, 30, 21, 23, 28, 32, 30, 28, 28, 27, 26, 26, 27, 27, 26, 25, 27, 28, 28, 28, 27, 26, 26, 25, 26, 27, 28, 37, 35, 34, 32, 31, 31, 31, 33, 32, 31, 32, 34, 33, 32, 33, 31, 30, 30, 30, 32, 34, 33, 30, 34, 35, 27, 34, 60, 91, 99, 59, 32, 45, 54, 65, 60, 50, 51, 58, 55, 51, 56, 57, 58, 59, 61, 61, 59, 58, 59, 58, 59, 59, 59, 59, 59, 59, 60, 62, 62, 64, 65, 67, 69, 71, 72, 70, 67, 65, 64, 65, 64, 65, 65, 64, 63, 62, 64, 65, 65, 64, 63, 63, 63, 65, 63, 60, 60, 62, 62, 62, 64, 66, 66, 67, 66, 67, 67, 60, 60, 64, 68, 72, 75, 74, 68, 80, 80, 72, 71, 74, 69, 71, 89, 64, 100, 203, 203, 184, 197, 191, 149, 189, 178, 168, 173, 178, 190, 220, 219, 196, 105, 73, 74, 75, 69, 83, 78, 68, 65, 65, 63, 69, 78, 73, 73, 74, 78, 96, 118, 153, 185, 180, 155, 106, 84, 81, 71, 65, 69, 65, 59, 63, 57, 65, 67, 66, 63, 61, 64, 70, 64, 59, 65, 64, 60, 65, 64, 63, 67, 65, 62, 58, 61, 68, 70, 67, 64, 63, 64, 66, 68, 65, 61, 61, 65, 66, 66, 66, 65, 63, 63, 63, 64, 65, 67, 65, 58, 61, 61, 62, 67, 69, 68, 65, 64, 62, 57, 44, 36, 44, 49, 44, 46, 49, 52, 42, 30, 55, 73, 47, 17, 21, 36, 31, 24, 31, 30, 25, 26, 26, 26, 25, 24, 23, 26, 28, 28, 28, 28, 28, 27, 26, 26, 27, 28, 32, 32, 31, 31, 31, 30, 30, 31, 31, 30, 30, 31, 32, 33, 30, 28, 31, 34, 32, 30, 32, 32, 32, 32, 26, 26, 44, 122, 94, 82, 34, 49, 53, 55, 58, 58, 54, 51, 53, 55, 56, 56, 58, 59, 59, 59, 59, 57, 56, 55, 54, 52, 52, 53, 55, 56, 55, 55, 56, 58, 61, 64, 66, 65, 66, 66, 64, 63, 64, 66, 66, 65, 65, 64, 64, 65, 66, 66, 67, 67, 65, 62, 61, 62, 61, 61, 61, 63, 65, 65, 63, 62, 64, 66, 67, 66, 64, 62, 53, 62, 62, 65, 60, 46, 54, 70, 80, 83, 93, 90, 83, 69, 84, 127, 148, 202, 211, 196, 202, 198, 169, 168, 179, 189, 184, 170, 200, 186, 214, 198, 198, 174, 102, 70, 71, 63, 76, 61, 79, 70, 76, 92, 67, 81, 85, 72, 110, 184, 205, 196, 190, 201, 204, 214, 206, 196, 175, 146, 76, 59, 71, 62, 58, 53, 65, 69, 63, 65, 64, 63, 63, 62, 61, 62, 64, 65, 65, 64, 64, 62, 61, 60, 54, 53, 58, 63, 65, 66, 65, 66, 67, 66, 66, 66, 66, 66, 65, 64, 63, 64, 65, 64, 61, 61, 63, 64, 64, 61, 60, 60, 63, 64, 63, 62, 62, 63, 65, 64, 55, 46, 44, 41, 37, 35, 41, 42, 39, 28, 27, 57, 67, 48, 27, 24, 31, 26, 30, 34, 29, 28, 28, 28, 28, 28, 28, 28, 29, 29, 28, 28, 27, 27, 26, 26, 28, 30, 32, 31, 29, 27, 25, 23, 22, 28, 28, 28, 28, 30, 31, 32, 32, 29, 31, 34, 31, 27, 29, 33, 32, 33, 27, 25, 71, 138, 70, 38, 29, 66, 50, 65, 56, 59, 55, 53, 54, 56, 57, 58, 60, 60, 60, 59, 57, 55, 54, 51, 50, 50, 49, 51, 53, 55, 55, 56, 58, 59, 61, 61, 61, 66, 67, 67, 66, 65, 66, 68, 66, 65, 65, 64, 64, 65, 66, 66, 67, 67, 65, 62, 61, 63, 62, 61, 61, 64, 65, 65, 63, 61, 63, 66, 69, 67, 63, 58, 53, 72, 66, 55, 46, 75, 137, 194, 208, 216, 211, 198, 211, 226, 218, 235, 198, 208, 204, 199, 208, 203, 190, 164, 187, 190, 158, 148, 198, 192, 219, 206, 213, 219, 193, 101, 27, 45, 97, 101, 101, 74, 77, 93, 92, 75, 46, 93, 185, 195, 164, 171, 197, 204, 201, 207, 193, 196, 185, 231, 139, 45, 63, 69, 54, 77, 50, 67, 61, 59, 61, 61, 62, 62, 61, 62, 64, 65, 65, 64, 61, 58, 56, 54, 49, 48, 54, 59, 63, 65, 66, 66, 66, 66, 66, 64, 61, 59, 65, 67, 65, 65, 66, 67, 65, 61, 60, 63, 63, 62, 61, 62, 63, 63, 62, 61, 62, 64, 66, 68, 62, 53, 50, 45, 37, 31, 34, 36, 37, 30, 20, 42, 68, 61, 33, 18, 26, 25, 26, 27, 25, 25, 26, 26, 27, 28, 29, 28, 28, 27, 27, 27, 26, 26, 26, 27, 29, 32, 31, 31, 30, 28, 27, 26, 25, 29, 29, 29, 29, 31, 32, 33, 29, 27, 30, 33, 31, 29, 30, 36, 25, 29, 25, 16, 110, 82, 55, 23, 56, 57, 56, 55, 60, 59, 57, 56, 56, 57, 60, 61, 62, 62, 61, 59, 57, 55, 54, 58, 56, 54, 52, 52, 52, 54, 56, 58, 60, 62, 62, 61, 60, 63, 65, 65, 64, 64, 65, 67, 66, 65, 65, 64, 64, 65, 66, 66, 67, 68, 65, 63, 62, 64, 63, 62, 62, 64, 66, 65, 63, 60, 65, 69, 67, 62, 60, 62, 71, 62, 58, 64, 133, 189, 215, 212, 225, 213, 200, 192, 197, 166, 177, 172, 181, 187, 197, 209, 203, 204, 187, 198, 189, 184, 175, 166, 179, 200, 189, 184, 192, 180, 208, 214, 173, 120, 85, 83, 72, 78, 96, 81, 75, 127, 167, 199, 201, 197, 193, 198, 194, 196, 200, 183, 186, 194, 189, 197, 189, 106, 62, 62, 75, 74, 56, 61, 60, 55, 57, 59, 61, 61, 60, 61, 63, 63, 62, 62, 61, 61, 62, 63, 59, 58, 60, 63, 64, 65, 64, 63, 63, 65, 67, 66, 64, 62, 71, 74, 70, 67, 66, 65, 64, 62, 63, 64, 63, 62, 60, 60, 62, 63, 63, 62, 64, 66, 68, 68, 65, 60, 56, 53, 45, 36, 35, 38, 42, 43, 35, 37, 57, 66, 47, 25, 23, 29, 28, 27, 27, 27, 28, 28, 28, 28, 28, 28, 29, 28, 28, 27, 27, 27, 26, 26, 28, 31, 31, 31, 31, 31, 32, 32, 32, 32, 32, 31, 31, 32, 33, 34, 26, 26, 29, 32, 31, 30, 32, 26, 34, 27, 28, 75, 106, 61, 27, 52, 49, 47, 50, 50, 57, 55, 55, 56, 57, 58, 62, 65, 65, 64, 63, 61, 59, 57, 55, 52, 51, 50, 49, 50, 52, 54, 58, 59, 60, 61, 62, 61, 61, 61, 62, 63, 62, 62, 63, 65, 66, 65, 65, 64, 64, 65, 66, 66, 67, 68, 66, 64, 63, 65, 65, 63, 63, 65, 66, 65, 63, 62, 67, 70, 65, 59, 61, 69, 74, 74, 53, 90, 214, 193, 197, 202, 201, 200, 219, 204, 188, 150, 216, 163, 161, 180, 185, 193, 191, 196, 174, 225, 173, 158, 172, 150, 201, 242, 203, 190, 164, 176, 188, 136, 176, 205, 205, 196, 198, 193, 196, 183, 180, 197, 185, 200, 207, 192, 178, 177, 187, 204, 199, 156, 192, 234, 227, 207, 211, 188, 77, 58, 92, 66, 71, 60, 61, 56, 57, 61, 63, 63, 61, 61, 62, 62, 61, 60, 60, 60, 61, 62, 59, 58, 59, 62, 63, 64, 64, 63, 63, 64, 64, 62, 60, 58, 65, 68, 65, 64, 65, 65, 63, 63, 65, 66, 64, 61, 59, 58, 63, 65, 63, 64, 64, 66, 68, 66, 64, 63, 60, 60, 57, 48, 43, 45, 45, 53, 53, 40, 43, 60, 61, 40, 23, 30, 30, 29, 31, 31, 30, 30, 29, 28, 27, 29, 30, 30, 29, 29, 28, 28, 26, 25, 27, 30, 30, 30, 30, 31, 31, 32, 32, 35, 34, 33, 32, 32, 32, 33, 29, 27, 29, 32, 30, 28, 29, 28, 33, 26, 43, 124, 89, 50, 34, 54, 49, 41, 44, 45, 45, 50, 52, 55, 56, 58, 64, 68, 65, 65, 64, 64, 62, 60, 58, 51, 51, 50, 50, 51, 53, 55, 56, 56, 56, 56, 59, 60, 61, 61, 62, 63, 63, 63, 64, 67, 66, 65, 65, 64, 64, 65, 66, 66, 67, 68, 66, 64, 65, 66, 65, 64, 64, 65, 66, 66, 63, 64, 65, 66, 66, 67, 68, 68, 64, 72, 70, 111, 213, 185, 208, 221, 167, 149, 168, 162, 162, 139, 221, 165, 122, 226, 197, 169, 220, 182, 173, 222, 181, 179, 180, 144, 208, 236, 163, 198, 161, 184, 205, 186, 217, 163, 206, 225, 213, 188, 173, 179, 152, 167, 178, 165, 175, 212, 196, 191, 183, 183, 187, 139, 150, 178, 158, 199, 198, 232, 148, 78, 79, 76, 69, 66, 62, 60, 62, 65, 66, 66, 63, 61, 61, 62, 61, 59, 57, 57, 59, 60, 56, 55, 57, 59, 61, 64, 65, 64, 63, 63, 62, 61, 60, 60, 64, 66, 65, 65, 67, 67, 64, 63, 63, 65, 65, 62, 60, 61, 63, 64, 62, 61, 61, 62, 64, 64, 64, 64, 62, 64, 65, 57, 49, 51, 47, 46, 52, 38, 35, 51, 66, 52, 20, 23, 27, 28, 29, 28, 28, 28, 28, 28, 28, 28, 29, 29, 28, 28, 27, 27, 26, 26, 28, 31, 29, 30, 31, 32, 31, 30, 29, 32, 33, 32, 30, 29, 29, 30, 31, 29, 26, 27, 30, 27, 24, 31, 18, 20, 66, 117, 72, 36, 56, 43, 57, 40, 45, 43, 44, 47, 49, 52, 55, 57, 62, 65, 65, 66, 66, 65, 64, 64, 64, 60, 58, 54, 53, 54, 54, 53, 56, 56, 55, 55, 57, 58, 59, 60, 62, 63, 64, 65, 66, 68, 65, 64, 64, 64, 64, 66, 67, 65, 66, 67, 65, 63, 64, 68, 70, 67, 65, 66, 69, 68, 65, 64, 64, 65, 67, 69, 68, 65, 73, 65, 77, 121, 210, 200, 202, 201, 182, 208, 205, 180, 198, 184, 223, 167, 105, 233, 202, 141, 215, 163, 157, 200, 204, 210, 179, 137, 194, 226, 122, 179, 160, 169, 177, 122, 218, 215, 173, 177, 170, 180, 186, 126, 157, 205, 163, 176, 188, 174, 183, 174, 168, 185, 184, 155, 174, 183, 138, 208, 184, 228, 199, 120, 72, 83, 76, 78, 60, 61, 57, 65, 64, 65, 63, 60, 60, 61, 61, 58, 57, 57, 59, 61, 60, 59, 58, 58, 61, 64, 66, 63, 61, 62, 64, 65, 65, 65, 67, 68, 68, 68, 70, 69, 65, 62, 62, 62, 62, 61, 61, 62, 62, 62, 61, 60, 59, 59, 59, 60, 63, 64, 64, 66, 65, 61, 52, 51, 43, 37, 47, 36, 29, 42, 58, 51, 25, 21, 27, 29, 31, 27, 23, 27, 31, 31, 29, 29, 30, 29, 28, 30, 28, 26, 25, 26, 28, 31, 31, 32, 33, 34, 33, 30, 29, 28, 29, 31, 30, 29, 30, 32, 35, 31, 30, 30, 25, 29, 33, 17, 29, 33, 108, 102, 49, 45, 54, 51, 47, 44, 43, 46, 48, 45, 46, 49, 52, 55, 57, 58, 63, 63, 64, 64, 64, 64, 64, 61, 57, 53, 53, 53, 53, 52, 54, 55, 56, 59, 61, 65, 67, 67, 67, 67, 67, 66, 65, 65, 66, 65, 63, 62, 62, 63, 65, 58, 62, 64, 63, 61, 64, 69, 74, 70, 65, 67, 70, 70, 67, 63, 65, 67, 66, 64, 64, 65, 65, 73, 71, 108, 228, 188, 179, 205, 216, 214, 212, 208, 193, 148, 173, 158, 156, 204, 215, 198, 224, 161, 182, 146, 169, 177, 170, 146, 148, 187, 160, 227, 187, 180, 170, 157, 199, 199, 127, 191, 215, 198, 231, 155, 151, 218, 149, 162, 172, 155, 235, 148, 183, 233, 201, 162, 188, 185, 149, 195, 188, 193, 190, 195, 160, 113, 87, 76, 67, 76, 58, 71, 68, 63, 62, 60, 59, 60, 61, 58, 57, 57, 59, 62, 63, 61, 58, 58, 61, 65, 67, 63, 62, 64, 65, 65, 63, 62, 64, 66, 65, 67, 69, 68, 65, 62, 61, 60, 60, 60, 60, 60, 61, 62, 62, 61, 60, 59, 58, 58, 61, 64, 66, 66, 63, 61, 56, 54, 46, 42, 52, 45, 31, 36, 50, 49, 30, 22, 30, 34, 33, 29, 24, 28, 32, 32, 28, 29, 30, 29, 31, 33, 33, 29, 26, 27, 29, 32, 32, 32, 33, 33, 32, 30, 29, 27, 29, 31, 31, 31, 33, 35, 33, 30, 34, 37, 19, 32, 42, 9, 38, 72, 133, 70, 40, 48, 54, 50, 46, 43, 44, 45, 45, 43, 43, 45, 48, 50, 53, 54, 59, 58, 58, 62, 65, 62, 58, 57, 57, 58, 55, 53, 52, 54, 55, 55, 55, 56, 57, 58, 60, 61, 61, 62, 64, 65, 67, 68, 66, 65, 64, 62, 63, 65, 65, 60, 62, 65, 63, 62, 64, 68, 72, 69, 66, 67, 69, 69, 67, 64, 65, 67, 66, 65, 64, 66, 65, 72, 69, 80, 155, 206, 203, 185, 216, 212, 206, 214, 224, 200, 214, 177, 183, 156, 172, 200, 185, 138, 233, 171, 206, 186, 181, 170, 208, 231, 210, 194, 146, 169, 188, 136, 157, 172, 134, 195, 199, 163, 224, 176, 106, 203, 170, 195, 192, 155, 192, 161, 194, 203, 195, 133, 202, 170, 156, 150, 160, 181, 180, 203, 202, 207, 173, 78, 74, 78, 60, 74, 68, 62, 62, 61, 61, 61, 61, 59, 58, 60, 63, 65, 66, 65, 62, 61, 63, 65, 66, 64, 63, 64, 65, 65, 63, 61, 63, 64, 64, 66, 68, 67, 63, 61, 61, 60, 60, 60, 60, 60, 61, 62, 62, 62, 61, 60, 59, 59, 61, 63, 65, 64, 63, 61, 61, 59, 56, 53, 56, 63, 45, 33, 49, 54, 28, 18, 31, 34, 27, 28, 32, 29, 28, 28, 27, 27, 28, 29, 30, 33, 34, 32, 30, 29, 31, 33, 33, 33, 33, 32, 31, 30, 28, 27, 29, 30, 29, 28, 29, 31, 28, 31, 26, 31, 22, 30, 24, 25, 27, 109, 101, 54, 44, 52, 52, 48, 44, 44, 45, 45, 45, 40, 40, 42, 44, 47, 50, 52, 57, 55, 56, 61, 66, 63, 57, 53, 56, 58, 56, 52, 52, 53, 53, 53, 54, 56, 59, 61, 63, 63, 63, 64, 64, 65, 65, 66, 66, 65, 65, 65, 67, 70, 71, 66, 67, 68, 66, 65, 65, 66, 69, 68, 68, 68, 68, 68, 66, 64, 66, 68, 67, 65, 65, 66, 67, 64, 71, 69, 78, 132, 187, 204, 197, 201, 211, 182, 181, 179, 174, 141, 201, 199, 192, 186, 203, 186, 202, 202, 218, 221, 202, 176, 165, 158, 168, 172, 164, 181, 188, 155, 149, 161, 157, 194, 195, 156, 218, 200, 138, 216, 231, 230, 208, 201, 179, 191, 174, 185, 196, 154, 208, 210, 234, 230, 176, 212, 181, 173, 179, 195, 185, 107, 55, 65, 69, 67, 51, 64, 69, 59, 63, 63, 62, 61, 61, 62, 65, 67, 68, 66, 64, 64, 65, 66, 65, 65, 65, 65, 65, 64, 62, 61, 62, 63, 62, 64, 66, 65, 62, 60, 60, 59, 59, 59, 59, 59, 61, 62, 62, 62, 61, 60, 59, 59, 60, 62, 63, 63, 62, 61, 60, 57, 56, 53, 54, 68, 52, 32, 46, 56, 38, 25, 31, 32, 25, 27, 34, 32, 27, 27, 27, 27, 29, 29, 29, 29, 29, 30, 28, 27, 28, 29, 34, 33, 32, 30, 29, 29, 28, 28, 29, 30, 28, 26, 27, 28, 30, 32, 23, 25, 33, 27, 17, 48, 48, 128, 61, 52, 52, 50, 50, 46, 44, 45, 47, 47, 45, 41, 41, 40, 43, 46, 49, 52, 56, 55, 56, 61, 65, 64, 60, 56, 56, 57, 56, 54, 53, 55, 56, 56, 56, 57, 59, 61, 63, 64, 63, 64, 64, 65, 65, 66, 69, 67, 66, 65, 64, 66, 67, 62, 62, 64, 65, 66, 66, 66, 68, 68, 68, 68, 67, 66, 65, 65, 67, 68, 68, 66, 66, 67, 66, 68, 74, 75, 69, 76, 78, 127, 202, 210, 214, 205, 180, 172, 194, 185, 198, 188, 207, 219, 235, 205, 190, 242, 180, 168, 169, 189, 209, 215, 220, 225, 204, 184, 185, 169, 169, 201, 206, 180, 171, 160, 183, 164, 158, 164, 172, 166, 152, 169, 195, 205, 196, 159, 188, 165, 162, 171, 163, 164, 163, 182, 187, 210, 199, 200, 199, 122, 47, 64, 77, 68, 48, 68, 74, 58, 62, 63, 63, 62, 63, 63, 64, 65, 67, 66, 65, 66, 68, 67, 64, 67, 69, 68, 66, 64, 62, 62, 62, 63, 63, 65, 67, 66, 62, 61, 61, 61, 61, 61, 61, 60, 62, 63, 63, 63, 62, 61, 60, 60, 61, 62, 62, 62, 62, 61, 58, 54, 52, 49, 53, 64, 54, 39, 43, 55, 61, 47, 29, 26, 28, 27, 29, 33, 31, 28, 29, 31, 33, 32, 30, 27, 25, 28, 28, 27, 26, 26, 35, 34, 32, 30, 29, 28, 28, 27, 29, 30, 29, 28, 29, 32, 34, 24, 32, 23, 29, 18, 37, 22, 96, 104, 56, 41, 47, 42, 48, 44, 42, 46, 51, 51, 49, 43, 42, 42, 43, 46, 50, 52, 53, 54, 56, 58, 60, 62, 63, 62, 58, 56, 56, 58, 59, 59, 60, 59, 59, 57, 57, 57, 58, 59, 59, 61, 63, 64, 66, 67, 68, 67, 66, 66, 66, 68, 69, 64, 65, 65, 67, 67, 66, 64, 66, 68, 69, 68, 67, 66, 65, 65, 67, 69, 68, 67, 66, 67, 62, 72, 68, 74, 71, 79, 64, 51, 112, 184, 235, 187, 97, 68, 63, 77, 85, 79, 80, 99, 83, 95, 130, 114, 130, 118, 106, 146, 132, 134, 100, 145, 185, 201, 214, 201, 190, 199, 236, 239, 226, 215, 209, 222, 206, 207, 213, 218, 222, 218, 213, 227, 207, 169, 190, 204, 203, 204, 210, 201, 206, 191, 187, 194, 168, 203, 220, 92, 68, 75, 62, 69, 59, 63, 67, 63, 64, 63, 63, 63, 63, 63, 63, 63, 64, 64, 64, 66, 68, 67, 64, 68, 70, 68, 66, 64, 63, 62, 63, 64, 63, 65, 67, 66, 63, 61, 61, 61, 61, 61, 61, 60, 62, 63, 63, 63, 62, 61, 60, 60, 61, 61, 61, 61, 61, 61, 57, 58, 52, 47, 58, 61, 58, 52, 40, 53, 85, 72, 28, 19, 33, 27, 20, 31, 38, 31, 31, 35, 35, 35, 32, 27, 28, 31, 32, 30, 29, 28, 35, 34, 33, 32, 31, 29, 29, 29, 28, 29, 30, 32, 31, 29, 29, 27, 30, 28, 27, 21, 25, 22, 127, 72, 51, 35, 40, 42, 43, 42, 42, 44, 46, 48, 47, 45, 43, 43, 42, 44, 47, 50, 49, 50, 52, 54, 56, 58, 59, 58, 57, 57, 57, 58, 58, 57, 54, 54, 55, 56, 57, 59, 60, 60, 60, 60, 61, 62, 63, 65, 67, 67, 67, 67, 69, 71, 72, 71, 69, 68, 68, 68, 66, 64, 66, 67, 68, 68, 68, 68, 68, 66, 65, 65, 67, 69, 69, 68, 63, 60, 69, 70, 73, 63, 67, 71, 46, 110, 220, 179, 70, 116, 185, 156, 95, 73, 109, 159, 81, 99, 140, 146, 202, 170, 134, 207, 211, 235, 119, 94, 98, 93, 98, 100, 112, 106, 145, 127, 134, 130, 123, 145, 124, 139, 137, 141, 119, 125, 112, 147, 138, 153, 151, 162, 174, 194, 196, 208, 206, 199, 183, 185, 194, 224, 163, 76, 70, 69, 57, 60, 61, 61, 61, 61, 61, 61, 61, 61, 64, 67, 69, 69, 67, 66, 66, 66, 66, 65, 63, 64, 65, 65, 65, 66, 66, 66, 66, 66, 65, 65, 65, 65, 63, 63, 64, 63, 63, 63, 63, 62, 63, 64, 63, 63, 62, 61, 61, 61, 63, 62, 62, 62, 63, 64, 60, 60, 53, 46, 55, 62, 66, 61, 40, 50, 79, 103, 20, 25, 25, 33, 26, 24, 37, 30, 32, 32, 32, 31, 30, 29, 31, 32, 31, 29, 30, 31, 29, 29, 29, 30, 31, 31, 31, 31, 29, 28, 30, 32, 30, 28, 25, 28, 30, 30, 31, 30, 11, 74, 133, 64, 50, 38, 42, 46, 43, 43, 44, 45, 46, 48, 48, 49, 48, 45, 43, 43, 45, 47, 45, 46, 47, 50, 52, 53, 55, 51, 52, 55, 59, 60, 60, 60, 57, 57, 58, 58, 59, 60, 60, 60, 60, 60, 61, 62, 63, 64, 68, 68, 66, 64, 64, 64, 64, 64, 63, 63, 64, 67, 67, 66, 67, 67, 67, 68, 68, 69, 69, 66, 64, 63, 66, 69, 69, 68, 69, 60, 75, 71, 69, 67, 64, 64, 63, 76, 148, 155, 76, 187, 177, 222, 167, 73, 173, 215, 107, 119, 164, 205, 221, 187, 169, 228, 149, 127, 92, 199, 215, 199, 118, 186, 211, 116, 64, 162, 182, 124, 61, 124, 133, 126, 74, 124, 126, 174, 116, 64, 125, 137, 103, 55, 83, 103, 109, 97, 192, 201, 198, 200, 175, 169, 99, 66, 78, 73, 67, 66, 68, 68, 64, 62, 61, 62, 61, 61, 63, 66, 68, 67, 67, 67, 66, 66, 64, 63, 63, 63, 63, 64, 64, 63, 62, 61, 62, 62, 61, 62, 62, 64, 64, 64, 64, 63, 63, 63, 62, 62, 64, 64, 64, 63, 62, 61, 61, 61, 63, 62, 62, 63, 64, 65, 63, 60, 54, 47, 51, 61, 67, 60, 40, 47, 73, 124, 49, 33, 27, 30, 26, 19, 31, 31, 32, 31, 31, 29, 28, 29, 31, 32, 29, 27, 29, 32, 33, 32, 32, 31, 31, 31, 30, 30, 29, 28, 29, 30, 30, 28, 27, 27, 31, 26, 29, 25, 5, 141, 118, 54, 48, 38, 47, 48, 44, 46, 46, 47, 49, 51, 51, 52, 50, 48, 45, 44, 44, 44, 43, 43, 43, 45, 47, 49, 50, 47, 49, 53, 55, 57, 58, 58, 55, 55, 57, 59, 60, 61, 62, 62, 61, 61, 62, 62, 62, 63, 67, 66, 65, 64, 63, 63, 63, 64, 62, 62, 64, 66, 67, 66, 67, 67, 67, 67, 68, 68, 68, 66, 65, 64, 66, 68, 68, 67, 66, 63, 75, 70, 66, 67, 65, 69, 81, 55, 107, 154, 56, 115, 163, 223, 167, 93, 180, 221, 131, 127, 165, 226, 209, 191, 173, 222, 200, 198, 120, 220, 146, 166, 159, 200, 142, 224, 82, 211, 198, 135, 93, 212, 196, 157, 76, 201, 172, 220, 115, 67, 229, 210, 154, 90, 196, 213, 216, 95, 175, 216, 209, 166, 105, 92, 72, 63, 79, 75, 68, 68, 70, 70, 67, 65, 65, 65, 64, 62, 63, 64, 64, 63, 65, 66, 65, 65, 64, 63, 63, 63, 64, 64, 64, 63, 62, 61, 63, 65, 63, 63, 63, 64, 64, 63, 62, 61, 61, 61, 61, 61, 63, 64, 62, 61, 60, 58, 58, 59, 60, 61, 62, 63, 64, 66, 64, 60, 55, 48, 48, 56, 62, 55, 41, 44, 65, 130, 96, 24, 34, 29, 28, 24, 26, 33, 29, 32, 31, 29, 28, 29, 29, 31, 29, 27, 29, 31, 38, 36, 35, 33, 31, 30, 29, 30, 29, 29, 28, 28, 29, 30, 30, 27, 31, 23, 26, 22, 35, 180, 95, 45, 42, 36, 46, 47, 43, 43, 44, 46, 48, 49, 50, 50, 49, 48, 47, 46, 46, 45, 44, 43, 42, 42, 45, 47, 49, 47, 49, 52, 54, 56, 57, 56, 54, 55, 56, 57, 58, 59, 60, 59, 59, 59, 61, 62, 64, 65, 66, 66, 65, 64, 64, 64, 65, 65, 64, 63, 65, 66, 66, 65, 67, 67, 67, 67, 67, 67, 67, 66, 66, 66, 66, 65, 65, 66, 62, 64, 71, 69, 64, 68, 63, 63, 65, 52, 102, 127, 79, 169, 225, 187, 75, 65, 134, 189, 100, 119, 206, 238, 148, 195, 182, 208, 164, 215, 129, 227, 148, 159, 144, 219, 149, 184, 74, 209, 166, 122, 104, 240, 175, 81, 74, 190, 169, 216, 99, 111, 179, 156, 191, 88, 139, 187, 244, 102, 187, 221, 154, 88, 54, 70, 82, 69, 69, 71, 66, 66, 68, 67, 65, 65, 66, 65, 63, 62, 63, 66, 66, 65, 65, 66, 66, 66, 65, 65, 65, 64, 63, 64, 65, 65, 64, 64, 67, 68, 66, 65, 64, 63, 63, 63, 63, 62, 62, 62, 62, 62, 61, 61, 60, 59, 57, 56, 56, 58, 60, 61, 62, 63, 65, 67, 64, 60, 56, 51, 49, 52, 59, 54, 46, 41, 57, 122, 127, 17, 34, 30, 31, 27, 26, 34, 27, 32, 31, 29, 28, 29, 29, 30, 28, 27, 29, 32, 32, 32, 32, 31, 31, 31, 30, 29, 29, 28, 26, 26, 28, 31, 30, 26, 29, 29, 29, 28, 111, 177, 79, 49, 41, 40, 46, 46, 42, 43, 44, 46, 48, 49, 50, 48, 49, 50, 50, 50, 50, 50, 46, 45, 44, 44, 46, 49, 51, 49, 50, 54, 59, 62, 63, 63, 63, 62, 62, 61, 59, 57, 56, 57, 57, 59, 61, 62, 64, 66, 67, 66, 64, 62, 61, 60, 60, 60, 59, 60, 62, 65, 66, 65, 67, 67, 67, 67, 66, 66, 66, 66, 67, 68, 65, 63, 63, 64, 62, 67, 70, 73, 70, 73, 61, 73, 46, 62, 163, 123, 89, 198, 152, 183, 124, 117, 195, 186, 73, 128, 233, 189, 105, 191, 176, 228, 185, 237, 120, 184, 186, 191, 119, 162, 170, 218, 83, 142, 155, 122, 109, 239, 194, 200, 66, 178, 186, 227, 95, 151, 170, 136, 183, 70, 136, 195, 219, 58, 191, 204, 111, 72, 70, 69, 74, 70, 66, 70, 71, 71, 71, 67, 64, 62, 62, 63, 62, 62, 63, 66, 67, 66, 65, 64, 64, 64, 64, 64, 64, 63, 63, 63, 63, 61, 60, 59, 61, 63, 61, 62, 62, 64, 64, 64, 64, 63, 63, 63, 63, 63, 62, 60, 60, 59, 58, 58, 59, 60, 62, 62, 63, 64, 66, 67, 65, 61, 57, 54, 51, 52, 60, 58, 51, 43, 56, 109, 147, 35, 29, 24, 25, 23, 29, 33, 31, 32, 31, 29, 28, 28, 28, 29, 28, 28, 30, 33, 36, 36, 34, 33, 31, 30, 29, 28, 29, 28, 26, 25, 27, 31, 31, 28, 26, 31, 26, 28, 174, 139, 59, 51, 40, 47, 51, 54, 46, 47, 49, 50, 51, 53, 54, 53, 53, 54, 54, 54, 53, 52, 51, 49, 48, 47, 50, 52, 55, 54, 55, 58, 60, 62, 62, 62, 60, 60, 61, 61, 61, 61, 62, 62, 61, 61, 62, 63, 64, 65, 66, 65, 64, 64, 64, 65, 66, 66, 65, 64, 65, 66, 65, 64, 67, 67, 67, 66, 65, 65, 65, 66, 68, 69, 66, 62, 62, 63, 62, 67, 67, 76, 75, 77, 58, 84, 43, 62, 223, 131, 64, 175, 224, 239, 139, 152, 247, 196, 68, 123, 236, 143, 132, 189, 152, 218, 213, 204, 94, 88, 140, 199, 121, 131, 164, 195, 50, 67, 137, 143, 124, 227, 135, 180, 86, 164, 171, 215, 102, 114, 168, 149, 184, 120, 171, 146, 148, 79, 181, 224, 97, 51, 81, 66, 57, 66, 63, 68, 69, 68, 68, 65, 62, 61, 62, 63, 61, 60, 62, 64, 65, 63, 61, 60, 61, 61, 61, 61, 61, 60, 61, 61, 63, 63, 63, 63, 65, 66, 64, 63, 63, 64, 63, 62, 61, 60, 60, 60, 60, 60, 62, 63, 63, 63, 64, 64, 65, 65, 65, 65, 65, 65, 66, 67, 65, 61, 59, 57, 52, 51, 61, 63, 57, 47, 58, 96, 147, 55, 26, 29, 26, 21, 37, 32, 31, 31, 32, 30, 28, 27, 28, 28, 28, 28, 30, 33, 37, 35, 32, 33, 33, 32, 31, 29, 28, 27, 27, 28, 30, 33, 35, 30, 25, 23, 17, 75, 181, 122, 51, 51, 34, 41, 51, 59, 56, 56, 55, 53, 52, 53, 56, 51, 51, 51, 51, 50, 50, 50, 51, 51, 52, 53, 55, 58, 59, 57, 58, 59, 59, 60, 61, 61, 58, 59, 59, 60, 61, 61, 60, 61, 62, 65, 65, 64, 64, 66, 64, 64, 64, 64, 65, 64, 64, 63, 63, 63, 65, 65, 65, 65, 70, 69, 66, 66, 67, 66, 65, 66, 67, 66, 65, 64, 63, 62, 69, 61, 72, 69, 61, 59, 83, 61, 43, 123, 228, 175, 64, 88, 156, 128, 79, 84, 113, 108, 81, 72, 89, 78, 120, 149, 92, 59, 73, 89, 101, 85, 127, 196, 127, 214, 248, 200, 65, 82, 145, 125, 124, 242, 200, 219, 97, 157, 213, 244, 112, 84, 201, 205, 162, 103, 174, 170, 243, 88, 168, 227, 109, 63, 60, 61, 55, 63, 68, 73, 72, 67, 66, 67, 68, 68, 67, 64, 63, 64, 64, 64, 63, 62, 64, 64, 64, 66, 67, 63, 55, 57, 59, 58, 60, 63, 64, 63, 60, 58, 58, 60, 61, 63, 65, 65, 64, 63, 63, 64, 63, 62, 61, 61, 61, 60, 61, 62, 63, 57, 55, 57, 60, 62, 65, 65, 71, 68, 59, 58, 53, 48, 54, 65, 62, 50, 53, 64, 127, 74, 23, 24, 25, 27, 31, 33, 35, 33, 32, 31, 30, 31, 32, 33, 30, 26, 26, 27, 34, 32, 30, 31, 32, 32, 31, 28, 28, 28, 28, 28, 27, 26, 26, 28, 25, 27, 25, 115, 164, 106, 44, 48, 37, 46, 52, 54, 54, 56, 57, 56, 55, 55, 57, 57, 58, 59, 60, 61, 62, 63, 53, 53, 54, 56, 58, 61, 62, 61, 61, 61, 61, 61, 62, 62, 60, 60, 60, 61, 61, 60, 59, 59, 61, 63, 64, 63, 63, 65, 64, 63, 64, 64, 65, 65, 65, 65, 65, 65, 65, 65, 65, 65, 69, 68, 66, 67, 69, 70, 69, 70, 69, 69, 68, 67, 66, 66, 68, 59, 61, 66, 66, 66, 79, 65, 33, 120, 238, 192, 137, 90, 69, 80, 97, 95, 81, 80, 94, 89, 86, 79, 88, 91, 81, 98, 115, 103, 89, 89, 121, 133, 112, 158, 152, 114, 76, 98, 112, 99, 131, 201, 208, 149, 69, 156, 199, 185, 81, 92, 205, 179, 134, 108, 189, 217, 218, 88, 143, 220, 126, 72, 69, 73, 63, 66, 69, 67, 70, 68, 67, 67, 69, 69, 68, 65, 64, 64, 63, 62, 62, 62, 65, 65, 64, 65, 66, 62, 55, 56, 59, 58, 59, 62, 63, 62, 59, 57, 58, 59, 61, 64, 65, 66, 64, 63, 63, 64, 64, 62, 60, 60, 61, 63, 64, 65, 65, 64, 63, 62, 62, 63, 63, 64, 70, 67, 60, 60, 53, 47, 51, 61, 62, 52, 52, 61, 120, 78, 20, 19, 22, 26, 29, 31, 32, 30, 30, 30, 30, 32, 34, 35, 32, 30, 30, 30, 31, 29, 28, 29, 31, 31, 31, 28, 29, 29, 29, 28, 26, 24, 23, 30, 24, 27, 35, 158, 140, 89, 41, 45, 43, 53, 53, 49, 52, 56, 60, 61, 60, 60, 61, 64, 64, 64, 64, 64, 64, 64, 62, 62, 62, 62, 63, 65, 65, 66, 66, 65, 65, 64, 64, 63, 63, 63, 63, 62, 61, 60, 59, 56, 58, 62, 62, 62, 62, 64, 62, 62, 63, 65, 66, 67, 67, 67, 67, 67, 66, 65, 65, 66, 69, 67, 66, 67, 70, 70, 70, 70, 70, 69, 69, 68, 68, 67, 65, 63, 55, 66, 72, 76, 71, 72, 39, 88, 183, 194, 191, 193, 197, 188, 181, 187, 198, 206, 213, 208, 169, 135, 124, 113, 112, 119, 136, 135, 184, 191, 182, 179, 173, 178, 180, 175, 176, 161, 157, 128, 130, 133, 132, 97, 98, 95, 84, 82, 54, 72, 110, 76, 65, 63, 69, 95, 93, 101, 172, 227, 117, 52, 59, 68, 59, 63, 72, 71, 71, 69, 67, 68, 69, 69, 67, 67, 65, 63, 61, 60, 62, 63, 66, 66, 63, 63, 64, 62, 57, 58, 59, 57, 58, 61, 62, 62, 60, 58, 58, 60, 61, 64, 65, 66, 64, 63, 63, 64, 64, 62, 61, 60, 62, 63, 63, 61, 59, 62, 63, 61, 60, 61, 62, 64, 68, 66, 61, 61, 57, 49, 50, 56, 59, 55, 54, 66, 120, 93, 26, 25, 27, 31, 31, 31, 29, 28, 29, 29, 30, 31, 34, 36, 34, 32, 32, 32, 29, 27, 26, 28, 30, 30, 30, 30, 29, 29, 28, 30, 31, 33, 32, 34, 21, 19, 46, 176, 119, 82, 48, 44, 46, 56, 55, 49, 51, 56, 62, 64, 64, 64, 63, 63, 63, 62, 61, 60, 59, 59, 64, 64, 64, 65, 66, 68, 69, 69, 68, 68, 67, 66, 66, 65, 65, 65, 65, 64, 63, 61, 60, 57, 59, 61, 61, 60, 60, 62, 60, 60, 61, 64, 65, 67, 68, 68, 68, 67, 67, 66, 66, 66, 70, 68, 66, 66, 67, 67, 66, 66, 66, 66, 66, 65, 65, 65, 63, 70, 61, 69, 70, 74, 67, 82, 49, 51, 128, 222, 207, 194, 209, 206, 210, 222, 206, 150, 89, 65, 45, 58, 68, 57, 61, 63, 59, 71, 74, 91, 168, 187, 181, 188, 222, 211, 220, 219, 217, 213, 202, 191, 212, 222, 216, 230, 227, 216, 215, 187, 174, 185, 207, 209, 215, 207, 206, 204, 207, 183, 88, 58, 73, 74, 62, 62, 70, 71, 70, 69, 68, 68, 69, 68, 66, 66, 64, 62, 60, 59, 61, 62, 66, 65, 63, 61, 62, 61, 59, 60, 59, 57, 56, 58, 60, 61, 60, 59, 60, 61, 61, 63, 65, 66, 64, 63, 63, 64, 63, 62, 61, 62, 64, 64, 62, 60, 57, 61, 63, 61, 60, 59, 61, 63, 65, 65, 63, 63, 59, 53, 52, 54, 60, 59, 52, 66, 114, 109, 30, 26, 29, 34, 35, 34, 32, 30, 31, 30, 30, 31, 32, 33, 31, 29, 29, 29, 30, 28, 26, 27, 29, 30, 28, 30, 30, 29, 29, 30, 32, 33, 34, 31, 23, 17, 65, 155, 100, 75, 55, 45, 48, 55, 56, 53, 52, 57, 62, 64, 64, 64, 64, 62, 62, 62, 62, 63, 63, 63, 59, 59, 61, 62, 65, 68, 70, 68, 68, 68, 68, 67, 67, 68, 66, 66, 66, 65, 65, 63, 62, 60, 61, 63, 62, 59, 59, 59, 59, 59, 60, 62, 64, 64, 65, 65, 65, 65, 66, 66, 66, 66, 70, 68, 66, 66, 67, 67, 65, 65, 65, 65, 65, 65, 65, 65, 64, 67, 68, 68, 66, 65, 65, 86, 71, 59, 74, 128, 171, 181, 178, 175, 163, 131, 91, 68, 67, 67, 57, 71, 78, 66, 63, 63, 78, 70, 69, 67, 84, 124, 175, 210, 196, 191, 205, 202, 200, 212, 205, 203, 180, 166, 137, 117, 114, 120, 153, 185, 216, 227, 217, 218, 215, 185, 199, 199, 183, 143, 85, 68, 75, 64, 66, 65, 70, 73, 71, 71, 68, 68, 69, 68, 66, 65, 64, 62, 61, 61, 61, 61, 63, 64, 64, 62, 61, 59, 59, 60, 59, 55, 54, 57, 59, 60, 61, 61, 60, 61, 62, 64, 65, 66, 64, 63, 63, 64, 64, 62, 62, 62, 64, 66, 67, 67, 67, 68, 67, 65, 63, 61, 61, 60, 62, 64, 65, 64, 62, 59, 58, 59, 66, 62, 46, 58, 99, 112, 24, 19, 23, 28, 32, 34, 34, 32, 31, 30, 29, 30, 31, 32, 30, 28, 28, 28, 32, 29, 27, 28, 29, 28, 27, 29, 30, 31, 31, 30, 28, 27, 26, 24, 27, 21, 84, 129, 87, 64, 55, 45, 49, 55, 56, 56, 54, 57, 61, 63, 63, 63, 64, 66, 66, 66, 65, 64, 63, 63, 67, 67, 66, 65, 66, 66, 67, 66, 67, 67, 68, 68, 69, 69, 65, 65, 66, 66, 65, 65, 64, 62, 63, 64, 62, 59, 58, 58, 58, 58, 59, 61, 61, 62, 62, 62, 63, 64, 65, 66, 66, 66, 69, 68, 66, 67, 69, 70, 69, 68, 68, 68, 68, 68, 68, 68, 65, 58, 66, 64, 65, 60, 62, 66, 68, 74, 65, 67, 65, 73, 87, 85, 79, 74, 71, 72, 79, 77, 72, 75, 76, 66, 60, 62, 72, 67, 69, 82, 75, 73, 99, 130, 171, 235, 211, 218, 221, 189, 137, 80, 82, 85, 80, 69, 71, 76, 76, 71, 82, 104, 145, 181, 191, 194, 183, 170, 115, 88, 69, 64, 66, 53, 68, 69, 68, 73, 72, 71, 69, 69, 69, 68, 66, 63, 63, 63, 63, 62, 61, 60, 61, 62, 64, 64, 61, 59, 59, 60, 59, 54, 53, 56, 58, 59, 61, 61, 61, 62, 62, 64, 65, 66, 64, 63, 63, 64, 64, 62, 63, 64, 64, 65, 65, 66, 67, 63, 61, 61, 61, 61, 60, 60, 61, 64, 65, 63, 62, 63, 62, 63, 70, 64, 41, 53, 93, 122, 29, 23, 24, 26, 28, 30, 30, 29, 28, 27, 28, 30, 32, 35, 32, 30, 30, 30, 33, 32, 31, 29, 27, 25, 25, 23, 27, 26, 26, 31, 31, 23, 25, 24, 22, 19, 107, 120, 82, 71, 49, 49, 49, 53, 52, 54, 53, 56, 60, 64, 67, 68, 69, 66, 66, 66, 66, 66, 65, 65, 67, 67, 67, 67, 67, 67, 67, 66, 64, 64, 67, 71, 72, 70, 66, 65, 65, 68, 70, 68, 64, 62, 66, 68, 69, 65, 59, 55, 64, 64, 62, 60, 59, 60, 60, 62, 62, 63, 64, 65, 65, 66, 66, 66, 66, 66, 66, 66, 66, 66, 66, 66, 67, 67, 68, 68, 68, 67, 68, 68, 68, 69, 69, 68, 68, 69, 69, 70, 70, 70, 70, 69, 68, 66, 66, 67, 67, 69, 65, 59, 59, 61, 62, 61, 63, 63, 64, 70, 73, 67, 57, 41, 72, 130, 173, 170, 130, 85, 55, 60, 78, 84, 79, 72, 69, 69, 69, 70, 69, 67, 66, 64, 66, 69, 68, 70, 72, 77, 82, 82, 74, 67, 62, 63, 65, 67, 68, 68, 68, 68, 69, 68, 66, 64, 66, 70, 67, 64, 64, 69, 72, 71, 68, 64, 61, 61, 61, 62, 62, 60, 59, 58, 59, 60, 63, 63, 62, 63, 64, 65, 64, 62, 60, 58, 60, 65, 67, 65, 65, 63, 61, 63, 65, 64, 61, 59, 60, 60, 60, 59, 59, 62, 62, 62, 61, 61, 66, 70, 68, 67, 73, 64, 42, 62, 75, 130, 50, 26, 23, 29, 25, 37, 31, 28, 22, 21, 25, 31, 35, 35, 31, 29, 29, 28, 32, 32, 31, 30, 29, 28, 28, 28, 29, 27, 27, 31, 33, 28, 20, 27, 25, 23, 109, 122, 87, 71, 50, 48, 54, 60, 60, 60, 60, 62, 64, 67, 68, 68, 67, 66, 66, 66, 67, 67, 68, 68, 68, 68, 68, 68, 68, 68, 68, 68, 68, 68, 69, 70, 70, 70, 69, 68, 67, 67, 67, 65, 61, 59, 60, 62, 64, 63, 61, 59, 65, 65, 64, 64, 63, 64, 65, 65, 65, 65, 65, 65, 65, 65, 66, 66, 66, 66, 66, 66, 66, 66, 66, 66, 67, 68, 68, 68, 68, 66, 65, 64, 63, 62, 62, 62, 63, 65, 66, 67, 69, 70, 63, 61, 60, 59, 60, 61, 62, 64, 62, 58, 59, 61, 62, 62, 64, 61, 55, 55, 60, 68, 72, 66, 58, 48, 44, 50, 62, 71, 72, 72, 71, 67, 63, 61, 63, 64, 65, 66, 69, 70, 71, 71, 67, 66, 67, 68, 70, 73, 76, 76, 72, 66, 64, 65, 66, 67, 69, 69, 68, 69, 70, 68, 66, 66, 67, 70, 66, 62, 61, 64, 65, 65, 64, 62, 61, 61, 62, 61, 61, 61, 61, 61, 60, 58, 61, 61, 59, 60, 61, 62, 61, 62, 62, 61, 62, 66, 67, 67, 66, 63, 62, 63, 65, 64, 61, 59, 60, 61, 60, 59, 59, 62, 62, 63, 62, 61, 64, 67, 66, 65, 69, 59, 41, 66, 81, 137, 65, 32, 28, 32, 28, 37, 31, 29, 26, 27, 28, 30, 32, 33, 32, 30, 30, 30, 32, 32, 32, 32, 32, 32, 32, 32, 32, 31, 30, 30, 30, 27, 23, 28, 22, 31, 119, 126, 94, 66, 50, 43, 57, 63, 65, 62, 63, 64, 66, 68, 69, 68, 67, 66, 66, 67, 68, 69, 70, 70, 69, 69, 69, 69, 69, 69, 69, 70, 72, 73, 70, 67, 67, 70, 70, 70, 70, 71, 71, 70, 69, 69, 67, 66, 64, 64, 64, 63, 65, 65, 65, 66, 66, 67, 68, 67, 67, 66, 66, 65, 64, 64, 66, 66, 66, 67, 67, 67, 68, 67, 68, 68, 68, 68, 68, 68, 66, 66, 66, 66, 66, 66, 66, 67, 66, 66, 66, 65, 65, 65, 59, 58, 57, 58, 57, 58, 59, 61, 60, 60, 61, 62, 63, 64, 59, 61, 65, 65, 60, 55, 53, 62, 67, 72, 77, 79, 76, 70, 70, 68, 66, 65, 65, 61, 57, 62, 65, 66, 66, 66, 66, 65, 73, 78, 78, 75, 71, 68, 67, 68, 67, 65, 68, 69, 69, 67, 69, 69, 68, 69, 70, 69, 67, 65, 67, 69, 68, 67, 66, 68, 69, 69, 67, 65, 64, 63, 63, 62, 63, 63, 65, 63, 61, 59, 61, 61, 58, 58, 59, 60, 60, 62, 62, 62, 63, 65, 66, 67, 65, 64, 64, 64, 64, 62, 60, 59, 60, 61, 61, 59, 60, 63, 63, 64, 64, 61, 61, 63, 62, 62, 65, 54, 41, 67, 85, 142, 83, 35, 30, 34, 31, 37, 32, 31, 31, 33, 32, 30, 29, 31, 32, 31, 32, 32, 32, 32, 32, 32, 33, 33, 33, 31, 32, 33, 33, 29, 25, 24, 33, 24, 16, 49, 136, 128, 96, 58, 49, 39, 56, 58, 63, 60, 59, 61, 64, 67, 68, 69, 69, 67, 66, 67, 68, 69, 70, 70, 69, 69, 69, 69, 69, 69, 69, 70, 72, 73, 70, 67, 67, 70, 71, 71, 72, 70, 70, 70, 71, 73, 72, 69, 67, 67, 69, 70, 63, 63, 64, 66, 66, 66, 66, 66, 66, 66, 65, 64, 63, 63, 66, 66, 66, 67, 68, 68, 69, 69, 68, 68, 68, 68, 68, 68, 68, 68, 68, 69, 68, 68, 69, 66, 66, 66, 64, 63, 63, 63, 61, 61, 62, 61, 61, 61, 60, 61, 62, 63, 64, 64, 65, 67, 67, 67, 65, 60, 58, 63, 71, 68, 60, 52, 50, 55, 64, 71, 71, 65, 57, 56, 61, 65, 67, 62, 60, 62, 66, 69, 70, 71, 68, 69, 71, 71, 67, 66, 66, 65, 65, 66, 68, 71, 70, 68, 70, 69, 69, 69, 71, 69, 67, 66, 67, 69, 70, 68, 67, 67, 68, 68, 67, 66, 66, 65, 64, 64, 64, 66, 66, 66, 63, 61, 64, 63, 60, 59, 60, 61, 61, 61, 62, 62, 62, 63, 63, 64, 64, 65, 65, 65, 63, 61, 60, 60, 61, 62, 61, 60, 60, 63, 63, 66, 66, 62, 60, 61, 61, 63, 65, 51, 42, 64, 81, 141, 99, 33, 28, 31, 33, 36, 33, 33, 33, 33, 32, 29, 29, 32, 33, 32, 33, 33, 32, 32, 32, 32, 31, 31, 31, 31, 31, 32, 33, 28, 28, 33, 34, 18, 20, 77, 152, 121, 93, 53, 55, 39, 58, 53, 60, 59, 57, 59, 63, 67, 69, 69, 69, 67, 67, 67, 68, 68, 68, 68, 68, 68, 68, 68, 68, 68, 68, 68, 68, 68, 69, 69, 70, 70, 72, 73, 71, 68, 65, 65, 67, 69, 68, 68, 67, 69, 72, 74, 64, 63, 65, 67, 66, 66, 65, 63, 63, 63, 64, 63, 63, 63, 65, 66, 67, 67, 68, 69, 69, 69, 69, 69, 69, 68, 68, 68, 69, 69, 69, 68, 66, 64, 64, 62, 61, 62, 62, 62, 62, 63, 67, 67, 68, 67, 66, 64, 62, 62, 64, 66, 66, 65, 65, 67, 68, 69, 68, 65, 62, 63, 65, 61, 61, 64, 67, 67, 61, 56, 61, 63, 64, 66, 68, 65, 62, 65, 66, 67, 65, 64, 62, 60, 66, 70, 71, 68, 65, 62, 62, 64, 65, 66, 68, 71, 70, 68, 70, 70, 69, 70, 71, 70, 68, 68, 68, 69, 69, 68, 65, 62, 61, 61, 63, 65, 66, 66, 66, 67, 66, 66, 66, 65, 64, 63, 67, 65, 61, 59, 60, 62, 62, 61, 62, 64, 63, 62, 62, 64, 64, 65, 66, 65, 61, 59, 60, 60, 61, 62, 61, 60, 61, 64, 64, 66, 68, 64, 60, 62, 63, 64, 67, 54, 45, 60, 76, 141, 115, 34, 29, 29, 34, 34, 31, 32, 30, 30, 30, 31, 32, 32, 33, 33, 32, 32, 32, 32, 32, 31, 30, 30, 30, 33, 29, 29, 30, 29, 34, 46, 25, 14, 29, 100, 160, 112, 90, 54, 61, 44, 62, 51, 59, 59, 59, 61, 65, 67, 68, 69, 68, 67, 67, 67, 67, 67, 66, 66, 67, 67, 67, 67, 67, 67, 67, 66, 64, 64, 67, 71, 72, 70, 71, 71, 72, 69, 67, 70, 74, 74, 73, 71, 70, 70, 71, 72, 65, 65, 66, 68, 67, 66, 64, 60, 61, 61, 62, 63, 63, 64, 66, 66, 67, 68, 69, 69, 70, 70, 70, 70, 69, 68, 68, 68, 66, 66, 68, 68, 68, 69, 68, 68, 68, 67, 66, 64, 64, 63, 70, 72, 72, 71, 69, 66, 63, 64, 66, 68, 67, 65, 65, 68, 73, 73, 72, 70, 69, 69, 68, 73, 72, 67, 65, 64, 64, 63, 68, 68, 64, 63, 64, 68, 71, 71, 72, 71, 70, 69, 68, 67, 59, 58, 61, 61, 61, 62, 64, 66, 67, 66, 68, 70, 70, 69, 70, 70, 70, 70, 71, 70, 68, 67, 67, 69, 71, 72, 70, 67, 66, 66, 67, 69, 68, 66, 66, 68, 68, 67, 66, 66, 65, 65, 67, 65, 60, 58, 58, 61, 62, 62, 64, 67, 65, 63, 62, 66, 65, 65, 67, 66, 61, 59, 60, 61, 62, 62, 62, 61, 62, 64, 64, 66, 70, 65, 62, 63, 65, 65, 68, 57, 49, 60, 76, 145, 129, 38, 32, 30, 35, 32, 29, 30, 28, 26, 27, 32, 35, 33, 32, 32, 32, 31, 28, 28, 28, 29, 29, 30, 32, 30, 33, 28, 23, 30, 31, 22, 33, 22, 28, 131, 157, 113, 75, 50, 50, 46, 67, 68, 64, 59, 61, 63, 65, 68, 70, 71, 71, 71, 71, 71, 71, 71, 71, 71, 69, 69, 69, 68, 68, 67, 67, 66, 67, 68, 68, 69, 69, 70, 70, 70, 71, 72, 73, 74, 74, 75, 74, 74, 73, 72, 71, 70, 71, 71, 70, 69, 67, 66, 65, 63, 63, 62, 62, 63, 63, 64, 63, 65, 67, 67, 66, 66, 67, 65, 66, 66, 66, 65, 66, 68, 69, 67, 65, 66, 69, 70, 69, 69, 70, 70, 68, 65, 65, 66, 65, 66, 67, 67, 66, 64, 63, 64, 65, 67, 69, 70, 69, 69, 69, 68, 68, 70, 71, 68, 62, 63, 67, 72, 71, 68, 66, 65, 64, 64, 66, 67, 67, 68, 67, 69, 68, 66, 66, 68, 68, 68, 67, 68, 69, 69, 69, 68, 67, 67, 69, 71, 71, 71, 73, 77, 77, 74, 69, 68, 69, 69, 67, 69, 69, 68, 69, 71, 72, 70, 70, 70, 70, 70, 70, 71, 71, 72, 72, 70, 69, 68, 68, 68, 66, 63, 60, 58, 58, 62, 65, 65, 65, 64, 62, 60, 61, 63, 62, 62, 62, 60, 58, 58, 60, 61, 59, 56, 55, 57, 59, 59, 57, 57, 58, 59, 61, 61, 61, 55, 63, 65, 39, 63, 84, 142, 132, 46, 27, 26, 34, 24, 25, 36, 30, 30, 36, 29, 29, 32, 31, 31, 30, 29, 27, 27, 27, 28, 28, 29, 31, 32, 34, 30, 27, 33, 35, 26, 35, 22, 32, 134, 156, 113, 74, 48, 50, 46, 66, 64, 59, 53, 55, 60, 66, 68, 68, 70, 72, 69, 69, 69, 69, 69, 69, 69, 71, 71, 70, 69, 69, 69, 69, 68, 69, 68, 68, 68, 68, 68, 69, 69, 69, 69, 69, 68, 68, 72, 72, 71, 70, 70, 69, 68, 67, 67, 67, 66, 66, 66, 66, 64, 63, 62, 62, 61, 61, 61, 61, 63, 65, 67, 66, 68, 69, 68, 68, 68, 67, 66, 67, 69, 69, 67, 65, 66, 68, 69, 69, 69, 70, 69, 66, 63, 61, 61, 62, 63, 66, 67, 68, 67, 67, 66, 66, 68, 69, 70, 70, 69, 69, 69, 70, 70, 68, 67, 66, 68, 69, 70, 70, 71, 71, 71, 71, 71, 71, 70, 69, 67, 66, 69, 68, 66, 67, 68, 69, 68, 67, 68, 69, 69, 69, 67, 66, 66, 69, 70, 71, 70, 72, 74, 75, 73, 70, 69, 69, 69, 67, 69, 69, 68, 70, 72, 73, 73, 72, 72, 72, 71, 70, 69, 69, 69, 69, 69, 68, 68, 68, 68, 67, 64, 61, 58, 59, 61, 64, 64, 65, 65, 63, 61, 61, 63, 62, 62, 63, 61, 59, 59, 60, 61, 59, 57, 57, 60, 61, 62, 61, 61, 61, 61, 59, 58, 58, 53, 60, 62, 36, 57, 82, 135, 137, 58, 31, 29, 38, 27, 29, 39, 33, 33, 39, 32, 33, 35, 34, 33, 33, 32, 28, 28, 27, 28, 29, 30, 32, 33, 32, 29, 29, 35, 35, 30, 38, 21, 37, 138, 154, 113, 72, 48, 51, 47, 65, 61, 54, 48, 52, 59, 66, 67, 67, 68, 71, 69, 69, 69, 69, 69, 69, 69, 71, 71, 70, 69, 69, 69, 69, 70, 69, 69, 68, 68, 68, 67, 70, 70, 69, 69, 68, 68, 68, 71, 71, 70, 69, 69, 69, 68, 67, 67, 67, 67, 66, 66, 66, 65, 64, 64, 62, 60, 59, 58, 57, 60, 63, 65, 66, 68, 70, 69, 70, 70, 68, 67, 67, 69, 70, 68, 66, 67, 68, 69, 68, 68, 69, 70, 68, 67, 67, 69, 69, 69, 69, 69, 68, 67, 67, 67, 68, 68, 69, 69, 70, 70, 69, 71, 72, 68, 66, 66, 70, 74, 71, 68, 69, 72, 73, 72, 72, 73, 72, 71, 69, 67, 65, 69, 68, 67, 67, 69, 70, 69, 70, 70, 71, 71, 70, 68, 68, 68, 70, 72, 72, 72, 72, 73, 73, 72, 71, 70, 69, 68, 68, 69, 68, 68, 70, 73, 75, 74, 73, 73, 73, 74, 74, 74, 75, 76, 75, 73, 71, 69, 68, 67, 66, 64, 62, 60, 59, 61, 62, 63, 64, 66, 66, 64, 62, 62, 62, 62, 64, 64, 62, 61, 62, 63, 61, 59, 60, 62, 65, 66, 65, 65, 64, 63, 61, 59, 60, 56, 61, 61, 38, 53, 84, 131, 145, 72, 32, 29, 37, 26, 29, 37, 33, 32, 37, 32, 33, 35, 33, 33, 32, 31, 30, 29, 30, 30, 31, 32, 34, 32, 30, 27, 28, 32, 32, 28, 38, 16, 39, 141, 153, 114, 71, 48, 51, 48, 64, 60, 55, 52, 56, 60, 64, 66, 67, 69, 70, 71, 71, 71, 71, 71, 71, 71, 69, 69, 69, 68, 68, 67, 67, 69, 69, 69, 68, 68, 68, 67, 70, 70, 71, 71, 72, 72, 72, 71, 70, 70, 70, 70, 70, 70, 71, 70, 69, 67, 66, 65, 64, 65, 65, 65, 64, 62, 59, 57, 57, 60, 62, 64, 64, 65, 67, 67, 68, 68, 67, 66, 67, 70, 70, 68, 66, 66, 68, 68, 67, 67, 68, 69, 67, 65, 65, 66, 66, 65, 66, 66, 66, 67, 68, 69, 69, 69, 69, 69, 70, 70, 70, 71, 71, 68, 66, 68, 71, 76, 74, 69, 68, 69, 69, 68, 67, 67, 68, 68, 67, 67, 66, 68, 67, 66, 67, 69, 70, 70, 71, 73, 73, 73, 72, 71, 70, 70, 71, 75, 74, 73, 71, 72, 70, 70, 71, 70, 69, 67, 67, 67, 67, 66, 68, 71, 72, 72, 72, 72, 72, 71, 71, 70, 70, 71, 71, 69, 68, 67, 67, 67, 67, 66, 63, 60, 59, 60, 60, 61, 63, 67, 68, 65, 63, 62, 61, 62, 65, 66, 64, 63, 64, 64, 63, 60, 61, 63, 66, 67, 64, 64, 66, 64, 62, 62, 65, 62, 64, 64, 41, 51, 89, 127, 153, 85, 30, 25, 35, 22, 27, 32, 29, 29, 34, 29, 29, 32, 30, 29, 29, 27, 30, 30, 29, 30, 31, 32, 34, 34, 29, 27, 29, 30, 29, 26, 35, 11, 40, 142, 151, 115, 71, 49, 52, 48, 64, 61, 59, 60, 65, 63, 62, 65, 69, 70, 69, 70, 70, 70, 70, 70, 70, 70, 70, 69, 69, 68, 67, 67, 67, 67, 67, 67, 68, 68, 69, 69, 70, 70, 70, 70, 70, 70, 70, 68, 68, 68, 69, 69, 69, 69, 70, 69, 68, 67, 65, 64, 64, 65, 66, 67, 66, 65, 62, 60, 60, 63, 64, 64, 62, 62, 63, 63, 65, 66, 66, 66, 68, 71, 70, 68, 66, 66, 67, 67, 66, 67, 68, 68, 66, 63, 62, 62, 63, 64, 64, 64, 66, 69, 71, 71, 71, 69, 69, 68, 69, 71, 71, 70, 68, 69, 70, 70, 70, 73, 73, 72, 70, 68, 67, 68, 66, 66, 67, 67, 67, 66, 66, 68, 67, 66, 67, 70, 71, 71, 72, 73, 74, 74, 73, 73, 71, 71, 73, 76, 76, 73, 72, 71, 68, 69, 72, 71, 68, 67, 68, 68, 66, 65, 67, 69, 70, 69, 70, 70, 69, 67, 65, 64, 63, 63, 63, 63, 64, 65, 66, 67, 68, 66, 64, 62, 60, 59, 59, 60, 63, 68, 70, 67, 64, 61, 60, 62, 66, 67, 65, 65, 65, 65, 64, 61, 61, 63, 64, 65, 63, 64, 66, 63, 60, 61, 65, 64, 63, 63, 40, 46, 89, 121, 160, 99, 33, 25, 37, 22, 29, 31, 30, 30, 35, 29, 30, 33, 31, 30, 29, 28, 29, 28, 28, 30, 30, 31, 32, 34, 31, 28, 30, 30, 29, 27, 33, 8, 40, 142, 149, 114, 72, 50, 53, 48, 64, 61, 63, 66, 71, 64, 61, 64, 69, 71, 67, 69, 68, 68, 68, 68, 68, 68, 70, 70, 70, 69, 67, 67, 67, 65, 66, 67, 68, 69, 70, 71, 70, 69, 68, 67, 66, 65, 65, 66, 67, 67, 67, 67, 67, 67, 65, 65, 65, 65, 65, 65, 65, 66, 66, 67, 67, 66, 64, 62, 63, 64, 65, 63, 60, 59, 59, 60, 62, 64, 64, 64, 67, 70, 69, 67, 66, 66, 67, 66, 65, 64, 65, 67, 67, 66, 67, 69, 70, 70, 69, 68, 69, 70, 71, 71, 71, 70, 69, 68, 69, 69, 70, 68, 66, 69, 72, 71, 68, 68, 71, 73, 71, 68, 68, 70, 67, 67, 67, 68, 67, 66, 65, 68, 67, 66, 67, 69, 70, 70, 71, 72, 72, 72, 72, 71, 69, 69, 71, 74, 74, 71, 69, 67, 67, 69, 71, 71, 68, 67, 68, 69, 67, 65, 66, 68, 67, 66, 66, 67, 66, 67, 67, 66, 65, 66, 65, 65, 65, 65, 66, 67, 67, 67, 64, 62, 60, 59, 58, 60, 63, 67, 70, 68, 64, 61, 60, 62, 66, 68, 66, 65, 65, 65, 64, 61, 61, 63, 63, 63, 64, 65, 66, 62, 57, 58, 62, 62, 61, 59, 37, 41, 86, 116, 163, 111, 36, 27, 39, 26, 32, 33, 32, 32, 37, 32, 33, 35, 33, 32, 31, 30, 33, 29, 29, 33, 35, 32, 28, 26, 33, 30, 33, 28, 32, 32, 29, 14, 44, 138, 146, 114, 74, 55, 53, 45, 61, 60, 61, 62, 67, 66, 65, 65, 66, 70, 71, 71, 67, 62, 60, 62, 64, 65, 64, 66, 66, 65, 65, 67, 70, 69, 67, 67, 69, 70, 71, 69, 68, 67, 67, 67, 68, 69, 70, 69, 67, 65, 65, 66, 66, 65, 64, 65, 67, 67, 66, 66, 67, 67, 67, 67, 67, 67, 66, 66, 66, 66, 65, 65, 64, 61, 58, 55, 57, 60, 60, 59, 62, 65, 65, 65, 67, 67, 67, 66, 65, 63, 63, 63, 64, 65, 65, 66, 64, 64, 65, 65, 66, 66, 66, 66, 67, 68, 68, 67, 66, 65, 63, 63, 64, 65, 66, 65, 64, 64, 64, 65, 66, 66, 65, 64, 64, 64, 66, 66, 66, 66, 66, 66, 67, 67, 67, 67, 67, 67, 68, 68, 68, 68, 69, 69, 69, 68, 68, 69, 69, 68, 65, 62, 68, 71, 69, 68, 68, 68, 69, 69, 68, 67, 68, 68, 66, 64, 64, 64, 63, 65, 67, 66, 63, 62, 62, 61, 64, 67, 69, 69, 67, 66, 66, 66, 64, 63, 62, 63, 62, 62, 64, 67, 67, 63, 61, 63, 66, 66, 65, 65, 66, 66, 66, 65, 65, 65, 66, 66, 68, 70, 67, 62, 61, 62, 59, 63, 68, 61, 36, 40, 82, 116, 158, 128, 31, 20, 35, 32, 33, 36, 36, 35, 35, 34, 32, 30, 29, 28, 28, 29, 33, 30, 29, 31, 32, 29, 26, 24, 31, 28, 32, 28, 33, 31, 31, 17, 40, 135, 149, 114, 71, 51, 53, 49, 68, 66, 64, 62, 63, 64, 66, 70, 73, 75, 76, 77, 72, 67, 65, 65, 66, 67, 67, 69, 70, 71, 71, 73, 77, 74, 71, 70, 70, 70, 69, 66, 69, 69, 67, 66, 65, 65, 65, 64, 62, 60, 61, 62, 64, 63, 60, 62, 65, 66, 64, 62, 59, 58, 61, 65, 69, 70, 70, 68, 71, 71, 71, 69, 67, 64, 63, 57, 59, 60, 60, 59, 60, 62, 64, 64, 65, 65, 65, 65, 64, 63, 63, 63, 62, 62, 61, 61, 60, 59, 60, 62, 63, 64, 64, 63, 63, 64, 66, 67, 69, 70, 70, 69, 67, 65, 63, 62, 61, 61, 62, 63, 64, 65, 65, 64, 65, 66, 67, 68, 68, 68, 68, 66, 67, 67, 68, 69, 69, 70, 73, 73, 72, 69, 67, 65, 63, 62, 64, 65, 66, 66, 65, 63, 69, 71, 69, 67, 65, 64, 64, 64, 64, 63, 65, 67, 67, 65, 63, 62, 63, 65, 68, 68, 67, 66, 65, 63, 64, 66, 67, 67, 66, 65, 64, 63, 62, 63, 64, 64, 62, 62, 64, 66, 66, 64, 63, 64, 66, 67, 67, 67, 70, 71, 70, 67, 64, 63, 63, 64, 66, 67, 65, 60, 60, 63, 61, 61, 66, 62, 40, 43, 82, 115, 161, 136, 38, 23, 36, 33, 35, 38, 39, 38, 37, 34, 31, 28, 28, 30, 30, 31, 34, 31, 29, 30, 30, 28, 25, 23, 29, 26, 31, 28, 33, 30, 34, 22, 36, 130, 152, 115, 71, 48, 53, 52, 71, 67, 61, 56, 62, 66, 70, 73, 74, 73, 72, 71, 68, 65, 65, 68, 70, 70, 70, 71, 71, 70, 69, 70, 72, 70, 69, 68, 69, 71, 70, 69, 69, 68, 67, 66, 65, 66, 66, 65, 62, 59, 58, 60, 61, 61, 60, 59, 59, 61, 63, 62, 61, 60, 61, 63, 65, 66, 65, 64, 65, 66, 67, 66, 65, 65, 67, 64, 63, 61, 58, 56, 54, 52, 56, 56, 56, 56, 56, 56, 56, 56, 56, 57, 58, 58, 59, 60, 57, 57, 57, 59, 60, 61, 62, 63, 63, 61, 59, 59, 60, 61, 61, 59, 58, 58, 59, 60, 62, 60, 60, 61, 62, 63, 63, 63, 62, 63, 64, 64, 65, 64, 64, 65, 65, 64, 63, 63, 62, 61, 63, 65, 65, 65, 65, 65, 65, 63, 63, 63, 64, 64, 63, 62, 66, 67, 66, 65, 64, 63, 62, 63, 63, 62, 63, 65, 65, 63, 62, 62, 62, 64, 64, 65, 65, 65, 63, 60, 61, 63, 65, 65, 66, 65, 62, 61, 61, 64, 66, 64, 63, 63, 64, 65, 65, 65, 65, 66, 66, 64, 62, 62, 63, 65, 64, 61, 59, 59, 61, 63, 65, 65, 62, 57, 57, 60, 57, 58, 63, 60, 44, 45, 78, 110, 161, 140, 40, 19, 29, 26, 27, 31, 32, 34, 33, 33, 31, 29, 29, 32, 32, 33, 33, 31, 30, 29, 29, 28, 29, 26, 30, 26, 32, 29, 33, 28, 33, 27, 31, 122, 152, 117, 75, 50, 54, 54, 73, 68, 61, 56, 65, 69, 75, 78, 79, 78, 75, 73, 70, 67, 67, 68, 69, 69, 67, 68, 69, 69, 69, 71, 73, 75, 73, 71, 72, 72, 71, 69, 68, 68, 67, 67, 67, 67, 68, 67, 64, 59, 58, 59, 60, 60, 63, 59, 56, 58, 62, 64, 64, 66, 65, 64, 62, 61, 61, 62, 60, 63, 65, 64, 63, 65, 69, 68, 66, 63, 63, 62, 60, 58, 57, 57, 56, 55, 56, 56, 57, 59, 60, 59, 58, 58, 58, 58, 55, 55, 55, 56, 57, 57, 57, 59, 58, 57, 56, 55, 55, 56, 56, 56, 55, 55, 56, 57, 59, 57, 57, 58, 58, 59, 58, 57, 56, 56, 57, 57, 58, 58, 57, 58, 59, 59, 59, 59, 59, 60, 61, 62, 62, 64, 63, 63, 63, 62, 61, 61, 59, 59, 58, 57, 59, 60, 62, 62, 63, 63, 63, 64, 64, 62, 63, 64, 63, 61, 61, 62, 62, 61, 60, 60, 61, 62, 60, 57, 59, 62, 65, 66, 66, 66, 64, 63, 63, 64, 66, 64, 63, 64, 64, 63, 64, 66, 66, 66, 66, 64, 62, 63, 66, 67, 66, 63, 60, 59, 60, 62, 64, 65, 62, 56, 55, 56, 54, 55, 60, 62, 50, 48, 74, 105, 157, 139, 41, 16, 25, 26, 30, 33, 34, 35, 34, 33, 31, 29, 30, 32, 33, 34, 33, 32, 31, 30, 29, 30, 33, 30, 33, 27, 33, 30, 32, 26, 31, 31, 28, 115, 150, 119, 84, 55, 58, 57, 76, 74, 70, 67, 71, 74, 79, 81, 81, 79, 76, 72, 70, 67, 67, 67, 67, 66, 64, 66, 68, 68, 68, 71, 74, 74, 73, 71, 70, 71, 70, 68, 69, 68, 67, 66, 65, 65, 65, 64, 60, 56, 56, 59, 62, 64, 66, 61, 57, 58, 61, 61, 59, 58, 59, 61, 65, 68, 69, 71, 71, 73, 72, 67, 61, 62, 65, 66, 64, 63, 64, 66, 65, 63, 62, 61, 60, 60, 60, 60, 62, 63, 63, 62, 61, 60, 58, 57, 56, 56, 56, 55, 55, 54, 54, 53, 53, 54, 55, 56, 56, 55, 56, 57, 57, 57, 55, 54, 53, 54, 55, 55, 55, 54, 52, 51, 50, 51, 52, 52, 53, 52, 52, 52, 53, 53, 54, 55, 55, 56, 60, 60, 59, 59, 57, 56, 55, 54, 53, 53, 53, 52, 52, 52, 52, 53, 55, 57, 59, 59, 59, 59, 59, 58, 60, 62, 61, 59, 60, 61, 62, 61, 59, 60, 63, 65, 63, 60, 59, 61, 65, 66, 67, 68, 67, 67, 66, 65, 65, 64, 64, 65, 64, 62, 63, 66, 67, 66, 65, 64, 62, 64, 67, 68, 66, 65, 63, 62, 62, 62, 63, 66, 63, 58, 58, 60, 57, 57, 62, 66, 57, 51, 74, 102, 159, 146, 47, 18, 25, 27, 32, 34, 34, 35, 34, 33, 31, 30, 29, 31, 32, 34, 30, 30, 30, 30, 31, 32, 34, 33, 31, 30, 34, 31, 34, 30, 30, 31, 29, 109, 150, 122, 90, 56, 62, 55, 78, 77, 77, 76, 78, 78, 78, 79, 77, 74, 71, 65, 63, 62, 63, 66, 67, 66, 66, 65, 67, 68, 67, 66, 68, 71, 66, 65, 65, 67, 71, 69, 68, 68, 66, 64, 63, 62, 62, 61, 58, 55, 57, 61, 62, 60, 66, 61, 58, 60, 62, 60, 55, 55, 58, 61, 63, 61, 58, 54, 57, 61, 63, 61, 60, 61, 66, 68, 64, 60, 62, 64, 63, 59, 59, 59, 57, 57, 58, 60, 61, 61, 60, 59, 60, 61, 61, 60, 57, 58, 57, 57, 57, 56, 56, 54, 54, 54, 55, 55, 54, 53, 51, 51, 53, 54, 56, 56, 56, 58, 58, 57, 54, 52, 49, 47, 50, 52, 53, 53, 50, 51, 53, 54, 53, 51, 51, 52, 52, 51, 52, 52, 52, 54, 54, 53, 50, 52, 52, 52, 52, 51, 51, 52, 51, 51, 53, 54, 55, 54, 52, 52, 52, 52, 56, 60, 60, 58, 58, 61, 63, 63, 63, 62, 63, 65, 64, 62, 61, 62, 63, 64, 66, 68, 69, 71, 70, 67, 64, 62, 62, 63, 63, 62, 63, 64, 65, 64, 62, 61, 60, 60, 61, 62, 61, 60, 61, 62, 63, 62, 61, 62, 62, 61, 61, 62, 61, 62, 65, 68, 60, 51, 72, 102, 159, 156, 52, 25, 26, 25, 28, 29, 29, 30, 31, 32, 32, 32, 31, 30, 31, 31, 27, 26, 27, 30, 33, 33, 32, 31, 25, 33, 34, 30, 35, 36, 33, 25, 29, 96, 149, 124, 92, 54, 61, 43, 71, 71, 74, 74, 78, 77, 77, 80, 83, 83, 80, 74, 70, 67, 67, 67, 67, 65, 69, 64, 65, 71, 71, 68, 65, 69, 65, 71, 74, 72, 71, 63, 70, 69, 66, 63, 59, 56, 55, 59, 65, 71, 68, 62, 57, 57, 59, 57, 53, 53, 53, 51, 48, 49, 55, 65, 76, 83, 87, 89, 86, 88, 90, 90, 90, 91, 93, 88, 83, 79, 77, 76, 74, 71, 73, 71, 67, 62, 56, 52, 48, 47, 47, 46, 46, 47, 48, 49, 56, 58, 59, 62, 65, 68, 70, 78, 79, 80, 81, 83, 85, 86, 94, 96, 96, 94, 92, 89, 87, 86, 85, 85, 84, 82, 79, 78, 86, 89, 90, 90, 90, 94, 97, 92, 91, 90, 92, 95, 97, 98, 98, 95, 92, 93, 93, 89, 84, 76, 79, 87, 91, 90, 86, 84, 79, 75, 74, 72, 71, 69, 65, 61, 57, 55, 56, 55, 51, 45, 40, 42, 47, 55, 60, 58, 55, 56, 59, 63, 68, 71, 73, 73, 68, 64, 64, 64, 64, 61, 58, 53, 57, 63, 59, 50, 52, 62, 68, 67, 64, 60, 58, 56, 58, 66, 69, 64, 62, 61, 61, 59, 57, 58, 60, 62, 62, 61, 61, 66, 68, 67, 62, 43, 69, 102, 150, 158, 48, 32, 30, 28, 33, 32, 33, 33, 33, 33, 33, 32, 31, 30, 30, 29, 31, 30, 29, 31, 32, 31, 30, 29, 25, 32, 32, 29, 33, 34, 31, 24, 23, 81, 141, 121, 95, 55, 54, 37, 64, 71, 73, 72, 76, 76, 75, 77, 77, 76, 73, 67, 67, 67, 67, 68, 70, 73, 76, 69, 67, 71, 72, 69, 67, 65, 66, 67, 69, 68, 65, 60, 60, 62, 65, 67, 67, 66, 66, 56, 47, 40, 42, 50, 53, 51, 58, 89, 123, 137, 140, 148, 162, 178, 179, 177, 176, 174, 172, 172, 173, 176, 176, 176, 175, 175, 177, 178, 178, 173, 164, 155, 150, 149, 146, 146, 145, 144, 141, 138, 135, 136, 142, 145, 142, 138, 143, 152, 157, 155, 149, 144, 140, 140, 140, 141, 140, 142, 143, 145, 148, 149, 147, 150, 155, 160, 162, 162, 161, 159, 159, 161, 161, 162, 161, 161, 167, 165, 160, 164, 172, 175, 173, 176, 179, 180, 176, 168, 163, 164, 167, 170, 173, 176, 174, 166, 157, 172, 178, 176, 169, 163, 159, 158, 159, 158, 154, 153, 152, 150, 148, 150, 152, 152, 150, 146, 142, 141, 143, 140, 133, 124, 113, 101, 90, 76, 71, 72, 70, 65, 60, 55, 61, 61, 56, 54, 57, 63, 66, 73, 69, 56, 55, 64, 67, 62, 56, 55, 56, 54, 53, 58, 64, 68, 69, 69, 66, 63, 62, 63, 63, 62, 60, 62, 63, 64, 64, 68, 71, 73, 67, 43, 64, 98, 148, 155, 45, 31, 29, 28, 33, 34, 34, 34, 33, 33, 32, 30, 30, 30, 30, 30, 34, 32, 31, 32, 32, 31, 29, 28, 26, 31, 30, 28, 33, 31, 28, 23, 19, 67, 136, 126, 106, 64, 52, 37, 59, 70, 69, 66, 70, 71, 73, 73, 72, 71, 71, 68, 70, 71, 68, 66, 68, 72, 75, 69, 66, 70, 72, 70, 70, 74, 73, 63, 63, 72, 81, 94, 100, 97, 92, 90, 91, 96, 99, 116, 114, 110, 109, 117, 132, 145, 144, 137, 132, 133, 131, 118, 103, 102, 99, 95, 91, 89, 89, 90, 86, 87, 87, 86, 85, 87, 89, 95, 95, 97, 100, 105, 108, 109, 106, 107, 112, 116, 119, 120, 121, 128, 134, 137, 138, 138, 141, 145, 144, 143, 142, 142, 143, 145, 146, 141, 139, 136, 133, 131, 129, 129, 131, 131, 131, 131, 131, 129, 129, 132, 131, 129, 127, 126, 127, 129, 131, 129, 126, 126, 127, 127, 124, 122, 121, 120, 119, 119, 119, 121, 120, 121, 123, 123, 123, 124, 126, 122, 122, 124, 124, 124, 126, 129, 132, 130, 128, 127, 130, 132, 132, 132, 137, 142, 141, 138, 139, 143, 146, 145, 143, 143, 144, 144, 142, 148, 152, 153, 151, 146, 140, 135, 128, 123, 118, 113, 112, 110, 108, 96, 93, 98, 94, 82, 71, 67, 67, 65, 60, 58, 61, 66, 69, 62, 59, 63, 64, 63, 65, 69, 70, 67, 63, 63, 64, 66, 68, 69, 70, 73, 70, 42, 58, 92, 146, 156, 46, 32, 30, 30, 35, 35, 35, 34, 34, 32, 31, 30, 29, 30, 30, 31, 34, 32, 31, 33, 34, 33, 32, 29, 29, 33, 30, 30, 35, 31, 28, 27, 19, 56, 135, 130, 116, 73, 54, 43, 58, 69, 64, 61, 63, 67, 69, 70, 69, 69, 70, 71, 73, 74, 71, 69, 67, 66, 69, 67, 69, 72, 70, 70, 74, 58, 83, 99, 120, 134, 129, 134, 145, 154, 166, 170, 163, 148, 135, 115, 104, 88, 72, 68, 75, 86, 81, 79, 77, 79, 81, 78, 74, 73, 71, 68, 65, 64, 65, 65, 71, 73, 73, 71, 71, 73, 76, 74, 69, 67, 74, 83, 85, 83, 76, 75, 74, 73, 72, 71, 70, 71, 70, 70, 74, 79, 79, 77, 81, 83, 83, 81, 79, 76, 74, 86, 89, 88, 88, 88, 89, 89, 96, 96, 96, 98, 101, 107, 110, 110, 107, 104, 104, 108, 115, 120, 127, 135, 142, 144, 144, 149, 156, 161, 155, 147, 144, 143, 141, 136, 139, 144, 148, 143, 137, 134, 136, 137, 141, 146, 149, 149, 149, 150, 146, 143, 141, 141, 143, 143, 143, 139, 141, 144, 141, 136, 135, 139, 138, 136, 135, 136, 138, 139, 138, 125, 119, 120, 121, 120, 118, 116, 112, 110, 113, 116, 118, 115, 112, 115, 114, 112, 124, 140, 144, 137, 121, 104, 84, 68, 61, 62, 63, 63, 63, 66, 68, 68, 68, 70, 70, 69, 68, 66, 64, 66, 70, 69, 66, 70, 71, 44, 56, 87, 144, 158, 48, 33, 32, 30, 35, 35, 34, 34, 33, 33, 32, 30, 30, 30, 30, 30, 32, 30, 31, 33, 36, 36, 36, 32, 33, 36, 32, 32, 39, 33, 31, 33, 21, 49, 132, 130, 118, 72, 52, 48, 57, 68, 60, 60, 63, 65, 67, 65, 62, 60, 61, 63, 66, 70, 75, 76, 73, 68, 68, 72, 78, 77, 70, 69, 76, 92, 127, 142, 160, 169, 150, 150, 168, 165, 153, 131, 102, 72, 51, 39, 42, 51, 64, 69, 61, 48, 41, 52, 61, 56, 48, 46, 52, 56, 57, 60, 62, 63, 63, 63, 68, 69, 66, 62, 58, 59, 61, 66, 65, 62, 61, 62, 61, 59, 60, 60, 61, 62, 66, 70, 74, 73, 68, 62, 63, 68, 71, 71, 65, 64, 65, 67, 69, 72, 75, 72, 71, 71, 70, 70, 71, 73, 72, 71, 69, 68, 67, 68, 69, 71, 72, 72, 75, 78, 82, 85, 80, 85, 93, 95, 94, 97, 105, 114, 117, 122, 126, 130, 130, 130, 141, 155, 170, 173, 168, 165, 166, 154, 148, 144, 138, 132, 129, 129, 136, 137, 138, 139, 142, 141, 140, 141, 145, 146, 145, 143, 144, 147, 144, 140, 138, 138, 140, 140, 138, 146, 150, 148, 145, 142, 140, 139, 144, 146, 142, 138, 133, 128, 122, 118, 120, 125, 123, 117, 117, 124, 127, 126, 118, 101, 80, 67, 65, 70, 71, 72, 73, 73, 72, 69, 67, 70, 73, 69, 64, 63, 70, 69, 63, 66, 72, 48, 59, 87, 144, 158, 48, 32, 30, 28, 32, 32, 33, 33, 33, 33, 33, 32, 31, 30, 30, 30, 32, 32, 32, 33, 34, 35, 37, 35, 35, 36, 33, 32, 34, 32, 33, 37, 24, 41, 127, 132, 118, 77, 53, 44, 51, 64, 65, 66, 60, 64, 65, 65, 66, 66, 65, 67, 70, 63, 71, 79, 67, 63, 63, 71, 73, 74, 78, 84, 110, 157, 166, 160, 155, 148, 130, 124, 120, 103, 80, 67, 64, 65, 65, 68, 67, 63, 58, 56, 58, 61, 71, 64, 57, 60, 65, 63, 57, 55, 59, 62, 63, 62, 62, 63, 56, 56, 58, 57, 56, 57, 60, 58, 58, 57, 55, 54, 53, 53, 52, 53, 54, 54, 54, 57, 60, 62, 58, 52, 50, 52, 55, 57, 63, 61, 58, 57, 58, 58, 56, 61, 62, 63, 62, 61, 60, 59, 62, 63, 64, 64, 63, 63, 64, 66, 67, 69, 71, 70, 69, 68, 67, 68, 70, 71, 70, 69, 68, 68, 71, 75, 77, 76, 75, 75, 74, 76, 80, 83, 86, 94, 104, 102, 103, 110, 115, 116, 116, 116, 110, 110, 113, 118, 123, 125, 125, 120, 119, 120, 120, 120, 120, 119, 120, 121, 121, 123, 126, 129, 130, 130, 129, 128, 129, 133, 137, 139, 137, 135, 136, 139, 141, 143, 145, 148, 142, 134, 136, 146, 150, 146, 139, 138, 144, 136, 113, 97, 76, 63, 74, 75, 67, 73, 70, 65, 66, 66, 70, 70, 65, 64, 68, 69, 65, 67, 74, 55, 56, 85, 144, 158, 48, 29, 28, 29, 30, 31, 31, 32, 33, 33, 33, 33, 32, 31, 31, 31, 34, 34, 35, 33, 32, 33, 36, 36, 36, 34, 32, 31, 30, 30, 34, 39, 24, 34, 121, 136, 120, 86, 58, 41, 47, 61, 68, 68, 66, 70, 70, 70, 72, 72, 67, 66, 76, 65, 62, 61, 53, 60, 78, 64, 66, 78, 109, 151, 183, 175, 149, 112, 83, 68, 64, 64, 76, 65, 53, 53, 59, 63, 62, 60, 59, 58, 58, 57, 55, 52, 54, 51, 48, 49, 50, 52, 51, 56, 59, 59, 55, 51, 49, 48, 54, 57, 58, 57, 55, 55, 57, 56, 58, 62, 65, 68, 69, 70, 76, 77, 77, 73, 67, 65, 65, 67, 66, 62, 58, 57, 57, 57, 61, 58, 56, 59, 63, 62, 59, 52, 53, 56, 59, 62, 63, 64, 62, 61, 60, 61, 63, 62, 58, 56, 57, 59, 57, 52, 47, 44, 44, 45, 46, 48, 51, 49, 45, 46, 47, 49, 51, 52, 53, 55, 55, 54, 52, 51, 51, 51, 51, 48, 47, 49, 50, 49, 49, 50, 55, 56, 56, 54, 51, 47, 44, 44, 45, 47, 50, 53, 52, 50, 51, 52, 52, 53, 55, 58, 61, 60, 58, 58, 62, 70, 77, 80, 91, 99, 104, 109, 114, 120, 126, 129, 134, 139, 135, 124, 121, 127, 137, 133, 127, 125, 115, 111, 106, 100, 83, 62, 59, 68, 72, 67, 63, 64, 66, 70, 67, 64, 65, 68, 67, 69, 75, 57, 50, 82, 143, 159, 48, 27, 27, 29, 27, 32, 33, 34, 35, 35, 34, 32, 32, 33, 33, 33, 34, 34, 35, 33, 32, 33, 36, 36, 35, 34, 33, 31, 30, 29, 35, 38, 27, 32, 115, 135, 122, 88, 60, 42, 49, 65, 73, 74, 66, 71, 72, 70, 72, 72, 69, 68, 69, 67, 63, 62, 66, 70, 62, 47, 84, 133, 174, 187, 146, 106, 84, 63, 62, 69, 71, 65, 59, 58, 57, 56, 57, 60, 63, 62, 60, 59, 60, 61, 60, 58, 59, 62, 65, 65, 63, 63, 65, 55, 57, 61, 62, 59, 54, 51, 50, 50, 51, 48, 44, 41, 40, 43, 47, 50, 47, 41, 38, 39, 43, 45, 48, 49, 49, 51, 53, 53, 53, 54, 57, 61, 65, 68, 67, 65, 64, 66, 70, 70, 67, 73, 75, 75, 74, 73, 71, 71, 75, 73, 71, 74, 77, 74, 65, 61, 64, 68, 69, 67, 64, 62, 61, 62, 63, 65, 65, 64, 61, 63, 64, 63, 61, 60, 59, 59, 62, 63, 63, 62, 63, 64, 65, 65, 65, 65, 63, 60, 58, 58, 56, 57, 59, 63, 65, 65, 65, 64, 63, 65, 68, 69, 68, 65, 69, 70, 68, 66, 64, 64, 64, 66, 65, 62, 60, 60, 60, 60, 62, 65, 66, 67, 70, 76, 82, 90, 93, 97, 111, 130, 140, 142, 142, 139, 136, 144, 138, 116, 120, 117, 76, 61, 76, 65, 65, 68, 63, 63, 64, 69, 67, 63, 64, 67, 65, 69, 73, 56, 49, 81, 142, 159, 48, 27, 27, 28, 26, 32, 36, 37, 36, 35, 34, 32, 32, 33, 33, 33, 34, 34, 35, 33, 32, 33, 36, 35, 34, 33, 32, 30, 29, 29, 37, 37, 29, 28, 107, 136, 125, 87, 60, 41, 49, 66, 76, 78, 64, 70, 72, 70, 70, 70, 69, 74, 60, 61, 64, 64, 65, 60, 75, 112, 141, 151, 141, 112, 83, 61, 61, 61, 64, 65, 65, 63, 57, 63, 69, 69, 66, 63, 64, 68, 68, 68, 70, 72, 73, 72, 68, 66, 64, 62, 63, 64, 65, 62, 64, 65, 66, 68, 68, 68, 64, 66, 70, 72, 72, 68, 64, 55, 60, 66, 66, 62, 62, 66, 64, 63, 62, 60, 60, 58, 57, 60, 59, 58, 56, 55, 54, 54, 57, 56, 53, 53, 54, 55, 54, 50, 50, 52, 54, 57, 60, 61, 61, 60, 60, 61, 61, 60, 58, 63, 65, 66, 64, 61, 60, 61, 60, 62, 64, 64, 62, 60, 58, 60, 61, 62, 61, 61, 61, 60, 63, 64, 63, 63, 63, 62, 62, 60, 60, 60, 60, 59, 60, 62, 63, 63, 63, 62, 59, 56, 53, 55, 56, 58, 60, 62, 60, 57, 59, 60, 60, 59, 61, 63, 65, 65, 63, 62, 62, 65, 65, 65, 64, 65, 65, 62, 59, 58, 59, 59, 64, 70, 69, 65, 70, 82, 93, 104, 104, 111, 127, 124, 130, 132, 109, 79, 66, 69, 65, 62, 62, 61, 63, 67, 66, 61, 63, 66, 64, 66, 72, 55, 48, 80, 140, 157, 48, 28, 30, 33, 31, 32, 33, 34, 35, 34, 34, 33, 33, 33, 33, 33, 34, 34, 35, 33, 32, 33, 36, 35, 34, 33, 31, 30, 29, 28, 38, 35, 31, 25, 99, 136, 128, 88, 59, 38, 42, 57, 66, 67, 66, 73, 75, 73, 72, 74, 74, 69, 68, 73, 72, 55, 56, 85, 171, 189, 145, 96, 60, 40, 62, 68, 66, 63, 59, 63, 75, 90, 109, 105, 98, 93, 90, 89, 88, 85, 88, 97, 108, 119, 126, 128, 140, 138, 132, 122, 106, 84, 67, 71, 65, 54, 49, 49, 54, 58, 45, 45, 51, 56, 60, 60, 57, 61, 65, 66, 64, 60, 59, 60, 62, 62, 63, 68, 72, 75, 76, 65, 65, 68, 73, 77, 81, 84, 81, 79, 77, 76, 76, 78, 79, 80, 78, 76, 73, 71, 69, 69, 69, 70, 71, 69, 68, 70, 74, 71, 71, 68, 64, 60, 59, 60, 57, 59, 61, 60, 57, 55, 53, 57, 58, 58, 58, 57, 57, 57, 58, 58, 59, 59, 59, 58, 57, 56, 56, 55, 54, 52, 54, 57, 57, 59, 62, 65, 68, 69, 69, 67, 67, 69, 73, 77, 77, 75, 77, 77, 76, 75, 76, 77, 79, 83, 83, 79, 76, 72, 69, 65, 68, 73, 76, 76, 75, 73, 73, 80, 78, 71, 77, 87, 87, 77, 71, 76, 70, 60, 76, 90, 89, 96, 113, 94, 61, 69, 62, 57, 61, 59, 61, 66, 64, 60, 61, 64, 63, 66, 71, 53, 46, 78, 138, 155, 48, 31, 33, 37, 35, 33, 31, 32, 33, 34, 34, 33, 33, 33, 33, 33, 34, 34, 35, 33, 32, 33, 36, 34, 34, 33, 31, 29, 28, 28, 40, 35, 32, 22, 94, 137, 130, 89, 59, 37, 41, 56, 64, 66, 58, 67, 69, 66, 64, 66, 68, 62, 63, 63, 66, 52, 63, 134, 181, 129, 76, 62, 61, 63, 60, 62, 64, 72, 84, 89, 83, 73, 50, 40, 33, 37, 46, 48, 45, 51, 51, 53, 53, 51, 45, 39, 40, 52, 69, 84, 94, 104, 111, 112, 111, 111, 109, 103, 92, 81, 76, 71, 63, 60, 60, 59, 57, 55, 53, 53, 53, 55, 57, 59, 57, 54, 52, 53, 54, 53, 50, 53, 54, 55, 57, 57, 57, 58, 57, 56, 57, 56, 57, 61, 65, 66, 66, 66, 67, 69, 71, 73, 75, 74, 73, 75, 77, 75, 71, 68, 71, 77, 79, 77, 75, 74, 73, 76, 79, 78, 73, 70, 69, 72, 73, 73, 72, 71, 71, 71, 72, 73, 74, 75, 74, 73, 71, 76, 78, 76, 72, 70, 71, 73, 77, 78, 78, 77, 76, 73, 71, 71, 72, 73, 75, 75, 73, 69, 71, 72, 69, 68, 67, 67, 68, 66, 65, 65, 67, 70, 70, 69, 65, 64, 64, 63, 62, 63, 65, 62, 61, 62, 60, 56, 57, 62, 69, 71, 74, 71, 68, 75, 68, 60, 69, 81, 73, 59, 60, 61, 59, 58, 60, 65, 63, 59, 60, 63, 62, 65, 69, 52, 45, 77, 138, 155, 48, 30, 33, 35, 32, 33, 34, 35, 35, 35, 33, 32, 32, 33, 33, 33, 29, 30, 31, 30, 30, 32, 34, 33, 32, 31, 31, 30, 30, 31, 33, 34, 26, 19, 93, 133, 133, 99, 61, 40, 42, 57, 70, 70, 63, 68, 69, 65, 64, 62, 56, 58, 62, 55, 51, 62, 94, 138, 124, 61, 50, 61, 58, 75, 72, 75, 79, 71, 66, 56, 44, 54, 75, 102, 128, 152, 154, 133, 124, 126, 125, 126, 133, 135, 122, 102, 99, 88, 78, 69, 56, 51, 56, 63, 67, 69, 72, 79, 89, 95, 109, 119, 129, 134, 130, 119, 108, 101, 97, 92, 88, 84, 81, 79, 68, 61, 56, 55, 57, 58, 57, 53, 52, 52, 52, 52, 52, 52, 51, 51, 52, 53, 53, 52, 51, 55, 56, 55, 55, 53, 52, 50, 61, 62, 60, 60, 59, 59, 58, 63, 65, 65, 64, 61, 58, 55, 63, 68, 70, 68, 64, 61, 60, 61, 63, 68, 72, 74, 75, 75, 71, 67, 66, 68, 71, 70, 66, 67, 67, 66, 65, 65, 66, 67, 66, 64, 64, 63, 63, 63, 63, 62, 60, 60, 59, 57, 57, 59, 63, 62, 58, 59, 62, 61, 58, 60, 59, 54, 54, 60, 61, 59, 59, 60, 59, 58, 59, 61, 64, 65, 62, 60, 62, 65, 70, 77, 82, 75, 70, 75, 74, 72, 68, 72, 67, 73, 66, 67, 63, 58, 56, 67, 62, 61, 71, 65, 60, 64, 60, 57, 69, 54, 40, 83, 139, 156, 46, 31, 29, 33, 28, 31, 33, 35, 36, 36, 35, 34, 34, 35, 34, 33, 29, 31, 31, 30, 29, 30, 33, 33, 32, 31, 31, 31, 31, 32, 31, 33, 25, 19, 89, 133, 135, 102, 63, 41, 40, 53, 70, 71, 69, 70, 70, 69, 64, 61, 62, 57, 60, 58, 72, 107, 122, 104, 66, 68, 63, 61, 68, 61, 66, 65, 76, 85, 115, 148, 163, 180, 196, 201, 190, 181, 167, 148, 151, 149, 155, 157, 161, 176, 198, 213, 204, 182, 168, 173, 173, 161, 152, 127, 124, 115, 100, 90, 85, 80, 64, 58, 55, 58, 64, 66, 65, 84, 84, 82, 89, 98, 102, 100, 110, 107, 102, 101, 104, 107, 109, 113, 113, 111, 109, 107, 106, 106, 98, 97, 98, 97, 94, 91, 89, 84, 83, 85, 87, 87, 87, 86, 84, 82, 78, 76, 75, 74, 74, 74, 74, 73, 72, 71, 70, 70, 72, 64, 56, 60, 68, 65, 55, 49, 49, 52, 55, 58, 57, 55, 57, 58, 59, 60, 60, 61, 63, 65, 64, 62, 66, 71, 71, 67, 65, 68, 71, 74, 74, 72, 70, 69, 72, 76, 81, 85, 91, 96, 93, 96, 103, 100, 96, 98, 109, 102, 102, 110, 112, 108, 110, 118, 113, 108, 111, 113, 115, 116, 115, 115, 113, 112, 110, 105, 101, 104, 105, 107, 116, 120, 115, 112, 122, 113, 99, 78, 75, 53, 67, 71, 63, 59, 65, 67, 72, 68, 64, 64, 58, 54, 69, 55, 38, 84, 141, 154, 45, 31, 29, 33, 28, 29, 32, 34, 36, 37, 35, 33, 34, 35, 34, 33, 33, 34, 33, 31, 30, 31, 33, 33, 32, 31, 31, 31, 31, 32, 33, 34, 26, 20, 78, 135, 136, 103, 66, 43, 38, 49, 67, 72, 70, 65, 67, 69, 61, 60, 71, 63, 51, 69, 110, 122, 98, 71, 56, 62, 62, 63, 58, 58, 84, 124, 158, 181, 194, 195, 182, 170, 162, 169, 170, 171, 168, 162, 166, 177, 170, 159, 156, 170, 186, 195, 190, 191, 198, 203, 195, 186, 184, 191, 194, 192, 189, 190, 195, 197, 185, 177, 168, 163, 159, 150, 142, 122, 111, 102, 101, 101, 96, 87, 82, 77, 69, 63, 62, 62, 64, 59, 58, 57, 56, 56, 56, 57, 60, 63, 65, 66, 67, 66, 66, 70, 73, 76, 80, 84, 86, 88, 97, 99, 100, 101, 104, 107, 109, 111, 110, 109, 108, 108, 108, 109, 115, 119, 120, 118, 115, 117, 121, 119, 116, 114, 117, 120, 120, 117, 112, 113, 116, 115, 113, 115, 120, 121, 116, 109, 109, 113, 119, 122, 115, 114, 117, 118, 113, 105, 98, 93, 93, 95, 94, 88, 83, 80, 81, 76, 68, 66, 67, 65, 61, 63, 62, 60, 64, 67, 66, 61, 53, 51, 55, 57, 58, 58, 56, 55, 54, 58, 64, 64, 61, 63, 62, 59, 55, 49, 44, 43, 45, 59, 78, 95, 106, 97, 76, 58, 66, 70, 72, 74, 61, 63, 67, 61, 53, 50, 66, 52, 40, 84, 146, 146, 44, 30, 30, 32, 28, 30, 32, 35, 36, 36, 34, 33, 33, 34, 33, 32, 36, 36, 35, 32, 30, 31, 32, 33, 32, 31, 31, 31, 31, 32, 35, 34, 26, 22, 65, 136, 137, 108, 71, 47, 40, 48, 66, 72, 63, 57, 62, 66, 58, 58, 73, 67, 53, 77, 111, 94, 62, 59, 70, 51, 50, 66, 68, 95, 139, 180, 199, 208, 194, 182, 180, 177, 167, 167, 171, 170, 168, 169, 169, 167, 172, 169, 161, 168, 192, 216, 221, 207, 194, 193, 196, 196, 196, 190, 190, 185, 181, 186, 198, 205, 204, 201, 195, 190, 188, 193, 199, 194, 192, 190, 187, 184, 178, 172, 165, 159, 151, 142, 136, 134, 134, 122, 120, 119, 120, 121, 122, 123, 101, 96, 94, 90, 87, 83, 81, 79, 78, 75, 72, 69, 66, 64, 63, 60, 55, 50, 46, 43, 42, 49, 49, 46, 44, 44, 44, 45, 49, 46, 45, 50, 58, 62, 61, 63, 61, 58, 59, 61, 60, 56, 57, 57, 57, 56, 53, 50, 47, 44, 42, 36, 27, 21, 22, 26, 50, 60, 62, 62, 62, 60, 58, 64, 70, 77, 81, 81, 80, 78, 88, 98, 101, 100, 94, 92, 97, 98, 102, 108, 107, 107, 114, 125, 131, 132, 131, 129, 127, 126, 126, 133, 137, 141, 149, 150, 147, 145, 147, 142, 130, 123, 126, 123, 105, 82, 56, 40, 35, 75, 71, 81, 72, 57, 64, 77, 64, 62, 58, 50, 47, 45, 60, 48, 43, 83, 153, 138, 42, 28, 31, 32, 30, 30, 32, 35, 35, 35, 33, 31, 31, 33, 32, 31, 35, 36, 35, 32, 30, 31, 33, 33, 32, 31, 31, 31, 31, 32, 36, 33, 29, 25, 53, 137, 140, 113, 74, 48, 42, 51, 66, 68, 52, 51, 58, 62, 60, 60, 65, 65, 67, 73, 78, 76, 66, 56, 51, 66, 71, 93, 133, 152, 181, 194, 180, 174, 168, 169, 178, 174, 167, 161, 162, 159, 161, 173, 172, 167, 174, 175, 169, 168, 174, 180, 203, 204, 203, 200, 197, 193, 192, 200, 203, 200, 192, 190, 190, 189, 186, 188, 189, 185, 182, 187, 195, 182, 182, 184, 184, 183, 182, 180, 183, 185, 188, 189, 191, 195, 199, 201, 200, 196, 191, 187, 184, 182, 192, 193, 191, 188, 186, 183, 182, 183, 182, 180, 177, 175, 173, 173, 175, 174, 171, 166, 163, 161, 160, 158, 153, 149, 143, 139, 138, 137, 144, 146, 144, 138, 131, 127, 127, 125, 126, 128, 128, 128, 127, 128, 133, 136, 139, 143, 147, 149, 150, 156, 164, 174, 181, 181, 180, 179, 161, 150, 146, 144, 145, 148, 151, 158, 163, 166, 168, 166, 166, 166, 166, 166, 168, 170, 174, 177, 179, 180, 178, 172, 169, 173, 181, 189, 188, 187, 185, 186, 188, 190, 192, 189, 184, 182, 186, 184, 179, 176, 181, 194, 198, 185, 170, 157, 137, 121, 125, 113, 113, 83, 57, 57, 75, 67, 64, 67, 61, 55, 56, 52, 50, 45, 57, 44, 46, 84, 160, 130, 40, 27, 32, 31, 30, 31, 33, 34, 35, 35, 32, 30, 31, 32, 31, 30, 33, 33, 33, 31, 30, 31, 33, 33, 32, 31, 31, 31, 31, 32, 37, 33, 29, 25, 45, 139, 141, 115, 75, 47, 43, 52, 64, 61, 44, 50, 57, 61, 65, 65, 59, 65, 71, 72, 68, 64, 62, 63, 57, 57, 102, 149, 170, 183, 185, 174, 163, 175, 181, 173, 177, 174, 167, 161, 169, 168, 168, 180, 172, 172, 177, 175, 170, 170, 176, 181, 196, 202, 206, 206, 203, 200, 197, 190, 193, 193, 190, 192, 196, 198, 192, 197, 205, 208, 204, 197, 190, 199, 195, 188, 189, 193, 193, 190, 190, 194, 197, 197, 195, 195, 196, 195, 193, 192, 190, 189, 189, 189, 193, 193, 193, 193, 193, 194, 195, 196, 195, 194, 193, 193, 194, 195, 199, 199, 195, 191, 188, 187, 187, 188, 186, 183, 181, 180, 181, 183, 189, 194, 196, 191, 184, 180, 181, 183, 187, 192, 188, 179, 174, 174, 173, 177, 180, 178, 176, 183, 194, 204, 204, 203, 206, 210, 206, 197, 189, 184, 179, 175, 177, 182, 187, 190, 191, 191, 189, 188, 189, 192, 195, 192, 186, 181, 181, 184, 186, 188, 184, 178, 175, 179, 187, 194, 195, 196, 198, 202, 203, 203, 203, 202, 196, 191, 192, 191, 186, 183, 189, 201, 199, 175, 159, 155, 141, 131, 137, 146, 167, 169, 99, 48, 53, 69, 74, 79, 76, 54, 49, 58, 60, 51, 57, 41, 46, 83, 164, 125, 39, 26, 33, 31, 31, 32, 33, 34, 35, 34, 31, 29, 30, 31, 30, 29, 29, 31, 32, 30, 28, 29, 30, 35, 35, 35, 35, 35, 35, 35, 37, 29, 32, 30, 33, 140, 139, 136, 64, 61, 44, 53, 58, 57, 53, 57, 58, 58, 60, 64, 65, 62, 74, 68, 72, 49, 45, 65, 65, 94, 166, 179, 173, 171, 173, 172, 171, 172, 172, 172, 171, 171, 166, 161, 163, 169, 172, 173, 173, 182, 181, 177, 175, 176, 181, 185, 195, 203, 211, 212, 200, 206, 196, 199, 198, 193, 190, 194, 200, 203, 198, 198, 196, 193, 191, 189, 187, 187, 187, 187, 188, 188, 188, 187, 187, 188, 189, 190, 190, 190, 190, 186, 184, 183, 184, 186, 187, 187, 187, 185, 183, 185, 190, 190, 189, 190, 191, 191, 188, 187, 188, 189, 195, 196, 193, 190, 188, 188, 186, 182, 181, 181, 182, 181, 181, 181, 183, 181, 179, 188, 199, 200, 193, 185, 186, 189, 188, 184, 181, 180, 179, 180, 182, 181, 180, 183, 188, 194, 194, 194, 195, 195, 194, 192, 193, 188, 178, 176, 185, 195, 196, 186, 183, 178, 179, 194, 195, 188, 185, 188, 196, 198, 193, 186, 182, 179, 180, 182, 184, 186, 190, 195, 204, 213, 222, 222, 213, 210, 214, 210, 204, 204, 211, 223, 231, 231, 223, 202, 179, 168, 156, 143, 141, 145, 146, 147, 139, 185, 177, 106, 57, 45, 102, 82, 81, 66, 70, 63, 52, 50, 60, 41, 48, 79, 167, 115, 30, 24, 32, 27, 35, 29, 31, 34, 35, 35, 33, 34, 33, 31, 29, 27, 31, 33, 33, 31, 30, 30, 32, 33, 32, 32, 31, 31, 31, 30, 35, 28, 28, 25, 27, 132, 144, 136, 65, 61, 45, 52, 61, 61, 56, 62, 62, 58, 60, 65, 69, 66, 71, 63, 59, 57, 58, 68, 102, 144, 177, 174, 170, 174, 174, 171, 172, 173, 174, 175, 175, 176, 171, 166, 166, 171, 172, 171, 171, 179, 178, 175, 174, 175, 178, 181, 193, 202, 210, 212, 208, 207, 205, 191, 191, 194, 197, 196, 196, 201, 203, 201, 199, 195, 191, 189, 187, 187, 188, 189, 189, 189, 188, 187, 190, 191, 191, 191, 191, 190, 189, 192, 192, 192, 194, 197, 199, 199, 199, 196, 195, 195, 197, 197, 195, 189, 189, 190, 190, 190, 191, 194, 195, 194, 194, 193, 193, 194, 194, 189, 187, 187, 186, 185, 183, 182, 178, 180, 185, 185, 183, 183, 187, 189, 193, 197, 197, 192, 186, 182, 180, 180, 181, 182, 184, 187, 189, 193, 195, 196, 196, 193, 189, 185, 186, 191, 194, 193, 195, 198, 195, 198, 212, 212, 197, 188, 188, 199, 201, 195, 185, 179, 180, 194, 209, 214, 214, 212, 212, 208, 205, 203, 198, 198, 200, 197, 192, 187, 184, 187, 188, 189, 193, 198, 200, 198, 197, 186, 173, 170, 161, 150, 150, 151, 146, 141, 142, 164, 173, 158, 129, 77, 54, 76, 72, 86, 86, 79, 68, 61, 65, 42, 45, 80, 162, 108, 30, 25, 32, 28, 34, 30, 32, 34, 35, 33, 32, 32, 31, 30, 28, 26, 33, 34, 34, 32, 31, 31, 32, 32, 31, 30, 29, 28, 27, 26, 31, 28, 27, 23, 24, 122, 155, 135, 68, 57, 45, 51, 65, 67, 62, 68, 67, 61, 59, 66, 72, 74, 65, 63, 55, 64, 64, 79, 148, 184, 171, 167, 166, 171, 171, 171, 171, 174, 175, 176, 177, 178, 174, 170, 169, 172, 172, 169, 171, 179, 177, 175, 173, 173, 176, 178, 189, 198, 205, 209, 214, 206, 214, 196, 189, 194, 204, 204, 203, 209, 208, 206, 205, 204, 204, 204, 205, 203, 203, 202, 201, 201, 201, 201, 201, 202, 203, 204, 205, 205, 205, 204, 202, 200, 200, 199, 198, 195, 196, 196, 197, 200, 202, 203, 203, 204, 204, 203, 201, 199, 199, 201, 206, 206, 203, 201, 198, 196, 195, 194, 194, 193, 192, 190, 187, 186, 189, 187, 184, 185, 187, 186, 183, 188, 194, 200, 202, 199, 194, 191, 187, 183, 180, 181, 184, 186, 186, 188, 191, 193, 195, 195, 193, 190, 190, 198, 207, 206, 201, 194, 185, 187, 196, 193, 183, 181, 177, 175, 185, 186, 181, 177, 177, 180, 185, 190, 191, 187, 184, 180, 176, 172, 175, 177, 180, 184, 187, 189, 189, 187, 187, 190, 191, 190, 188, 187, 188, 186, 182, 179, 170, 160, 157, 150, 146, 141, 152, 147, 157, 175, 167, 123, 43, 69, 66, 82, 82, 79, 69, 62, 62, 44, 43, 87, 156, 96, 31, 26, 31, 30, 33, 32, 33, 35, 35, 32, 29, 29, 29, 29, 27, 25, 33, 34, 33, 31, 29, 29, 30, 33, 32, 31, 30, 29, 27, 27, 31, 30, 30, 27, 29, 113, 167, 135, 74, 55, 46, 48, 67, 71, 67, 72, 70, 64, 63, 66, 71, 75, 59, 64, 60, 60, 59, 99, 176, 184, 159, 169, 169, 167, 171, 171, 172, 172, 173, 173, 174, 174, 172, 169, 171, 173, 171, 171, 173, 181, 180, 178, 177, 176, 178, 180, 185, 193, 199, 203, 214, 207, 215, 215, 202, 196, 202, 207, 207, 210, 212, 210, 205, 201, 199, 197, 196, 199, 199, 197, 196, 196, 195, 196, 195, 196, 197, 197, 197, 196, 196, 189, 188, 190, 193, 196, 197, 195, 196, 197, 196, 194, 191, 188, 187, 189, 192, 194, 195, 197, 201, 205, 205, 205, 204, 203, 204, 205, 206, 203, 203, 202, 202, 201, 200, 199, 188, 181, 179, 181, 188, 190, 187, 184, 187, 195, 198, 200, 200, 202, 197, 190, 182, 180, 183, 185, 184, 185, 186, 186, 189, 191, 194, 196, 196, 200, 204, 204, 201, 194, 182, 183, 196, 195, 179, 169, 164, 170, 173, 173, 173, 173, 175, 175, 174, 178, 178, 173, 171, 172, 173, 171, 171, 173, 176, 176, 173, 174, 178, 179, 180, 183, 183, 179, 175, 174, 170, 172, 175, 175, 172, 170, 168, 155, 151, 147, 153, 142, 150, 157, 154, 157, 81, 46, 68, 63, 67, 65, 57, 56, 59, 48, 41, 94, 148, 81, 32, 27, 32, 33, 33, 33, 34, 36, 35, 33, 29, 29, 29, 29, 26, 25, 34, 35, 34, 32, 29, 29, 30, 34, 33, 33, 33, 32, 31, 31, 35, 34, 32, 32, 32, 98, 161, 140, 83, 56, 47, 45, 66, 70, 71, 73, 71, 67, 67, 66, 65, 62, 59, 60, 62, 56, 74, 131, 176, 166, 162, 169, 170, 167, 170, 171, 172, 173, 174, 174, 175, 175, 173, 172, 173, 174, 171, 170, 174, 180, 179, 178, 178, 179, 181, 182, 186, 194, 198, 198, 206, 211, 209, 215, 212, 205, 201, 203, 204, 200, 204, 203, 201, 200, 201, 204, 206, 205, 203, 201, 199, 198, 199, 200, 202, 203, 203, 203, 202, 201, 200, 204, 203, 204, 205, 205, 203, 199, 199, 202, 204, 204, 202, 202, 202, 197, 197, 197, 196, 196, 197, 200, 201, 199, 197, 195, 194, 192, 192, 192, 193, 192, 192, 191, 189, 188, 189, 195, 199, 193, 183, 180, 185, 186, 190, 196, 200, 201, 201, 203, 197, 194, 193, 192, 191, 189, 188, 187, 186, 186, 185, 187, 189, 191, 193, 196, 199, 198, 201, 202, 198, 198, 195, 177, 168, 183, 196, 203, 209, 201, 186, 174, 171, 173, 176, 176, 173, 170, 172, 175, 174, 171, 169, 170, 172, 172, 171, 174, 179, 186, 187, 183, 180, 176, 171, 166, 166, 170, 170, 165, 169, 176, 174, 164, 158, 152, 146, 147, 153, 155, 150, 162, 133, 58, 63, 62, 66, 62, 58, 58, 59, 51, 38, 99, 140, 69, 34, 29, 32, 36, 32, 35, 36, 37, 36, 34, 31, 31, 30, 30, 28, 25, 36, 37, 36, 34, 31, 31, 32, 33, 33, 33, 33, 33, 33, 33, 38, 36, 32, 33, 30, 82, 148, 143, 89, 56, 48, 41, 64, 69, 74, 73, 70, 69, 70, 67, 59, 53, 68, 58, 62, 64, 106, 164, 163, 156, 174, 160, 161, 165, 164, 170, 171, 173, 174, 176, 178, 179, 178, 177, 178, 177, 171, 169, 173, 177, 177, 177, 178, 179, 181, 183, 189, 199, 199, 197, 200, 216, 203, 193, 211, 217, 208, 207, 209, 202, 203, 203, 202, 202, 204, 209, 212, 212, 210, 206, 203, 202, 203, 205, 203, 204, 207, 210, 212, 214, 215, 210, 209, 209, 209, 209, 206, 201, 199, 203, 208, 209, 207, 206, 207, 207, 208, 208, 206, 205, 205, 207, 207, 206, 204, 203, 203, 202, 202, 204, 204, 202, 201, 197, 195, 194, 190, 190, 193, 196, 197, 195, 194, 194, 199, 205, 207, 205, 200, 198, 191, 194, 204, 206, 202, 196, 193, 189, 189, 191, 192, 193, 192, 192, 193, 200, 205, 201, 200, 204, 209, 210, 211, 196, 183, 192, 204, 216, 215, 213, 214, 215, 210, 198, 183, 174, 173, 174, 181, 186, 184, 176, 170, 167, 167, 173, 185, 194, 198, 195, 188, 179, 175, 173, 169, 162, 157, 158, 156, 150, 162, 179, 180, 169, 156, 156, 151, 156, 150, 157, 151, 153, 185, 117, 50, 58, 67, 64, 61, 59, 56, 49, 35, 104, 137, 61, 34, 29, 32, 37, 32, 35, 36, 38, 38, 35, 33, 33, 33, 31, 29, 27, 37, 33, 30, 31, 34, 34, 33, 35, 31, 28, 29, 32, 33, 32, 27, 30, 30, 36, 29, 54, 166, 126, 77, 73, 55, 48, 52, 77, 60, 73, 71, 75, 73, 78, 51, 83, 52, 48, 62, 90, 125, 155, 167, 150, 159, 157, 165, 164, 172, 169, 171, 173, 176, 178, 179, 180, 184, 184, 182, 180, 178, 177, 176, 172, 173, 175, 179, 182, 185, 187, 194, 199, 198, 196, 205, 218, 225, 210, 203, 213, 227, 220, 207, 209, 203, 201, 202, 205, 209, 210, 210, 206, 208, 211, 211, 209, 208, 209, 207, 211, 218, 219, 218, 218, 220, 219, 216, 213, 212, 211, 210, 208, 210, 211, 213, 216, 217, 212, 205, 200, 202, 207, 208, 209, 211, 212, 212, 211, 209, 206, 206, 207, 211, 212, 209, 203, 199, 198, 199, 201, 208, 204, 195, 187, 186, 191, 198, 202, 203, 203, 199, 195, 193, 194, 189, 186, 187, 192, 200, 206, 207, 205, 198, 189, 186, 192, 199, 204, 203, 200, 197, 194, 193, 194, 196, 197, 196, 195, 195, 194, 189, 183, 189, 190, 187, 194, 208, 221, 227, 220, 205, 190, 191, 199, 200, 191, 189, 191, 187, 193, 206, 207, 212, 208, 186, 173, 180, 179, 165, 161, 165, 159, 154, 154, 156, 170, 177, 170, 162, 153, 146, 144, 147, 149, 158, 164, 162, 149, 59, 72, 80, 58, 61, 54, 65, 38, 51, 110, 137, 49, 28, 24, 29, 29, 29, 32, 34, 35, 34, 30, 29, 32, 34, 33, 32, 31, 32, 31, 31, 32, 34, 34, 32, 31, 31, 31, 32, 32, 34, 35, 26, 29, 29, 32, 25, 47, 162, 135, 83, 69, 51, 43, 50, 75, 60, 67, 66, 71, 74, 77, 51, 76, 52, 57, 67, 100, 129, 150, 164, 148, 157, 153, 160, 158, 163, 166, 168, 170, 173, 175, 177, 178, 181, 181, 180, 178, 177, 176, 175, 171, 172, 175, 178, 182, 186, 187, 195, 199, 199, 196, 200, 208, 211, 208, 200, 209, 228, 231, 222, 219, 222, 217, 210, 207, 208, 211, 212, 213, 216, 219, 219, 218, 218, 219, 226, 230, 232, 232, 230, 230, 231, 228, 226, 226, 227, 228, 227, 225, 223, 222, 223, 224, 222, 215, 209, 205, 205, 205, 203, 202, 204, 207, 216, 221, 223, 220, 217, 218, 221, 218, 210, 199, 191, 189, 192, 197, 199, 196, 192, 189, 189, 193, 197, 199, 197, 195, 193, 194, 195, 195, 194, 192, 188, 188, 191, 194, 195, 195, 201, 206, 205, 200, 197, 197, 200, 199, 198, 195, 193, 191, 191, 188, 187, 189, 192, 194, 195, 193, 191, 190, 191, 193, 196, 196, 194, 194, 199, 206, 210, 211, 214, 220, 223, 223, 217, 216, 218, 208, 205, 198, 183, 174, 177, 171, 160, 160, 165, 158, 155, 155, 157, 170, 177, 172, 165, 155, 146, 145, 148, 152, 151, 145, 160, 178, 112, 63, 72, 66, 66, 66, 63, 43, 49, 115, 138, 50, 33, 26, 26, 27, 30, 32, 32, 32, 32, 32, 30, 29, 30, 32, 33, 34, 38, 38, 38, 37, 35, 32, 29, 27, 32, 35, 34, 33, 34, 37, 27, 29, 31, 30, 22, 38, 154, 144, 91, 64, 48, 40, 51, 75, 65, 65, 66, 69, 73, 74, 51, 64, 47, 62, 66, 110, 133, 141, 144, 134, 147, 145, 153, 154, 159, 163, 164, 167, 170, 173, 175, 176, 180, 180, 178, 178, 176, 175, 174, 170, 171, 175, 179, 183, 187, 189, 194, 197, 200, 200, 201, 204, 206, 208, 196, 196, 210, 221, 226, 233, 242, 242, 243, 244, 244, 243, 241, 233, 234, 235, 233, 230, 230, 231, 220, 217, 213, 208, 205, 203, 202, 208, 210, 215, 221, 226, 227, 226, 223, 222, 220, 216, 211, 203, 197, 197, 198, 198, 196, 196, 199, 202, 206, 216, 226, 226, 217, 207, 202, 198, 196, 194, 193, 191, 189, 188, 188, 187, 187, 187, 190, 193, 196, 197, 198, 198, 197, 198, 203, 209, 210, 207, 201, 198, 198, 201, 202, 203, 199, 198, 207, 215, 212, 200, 196, 195, 194, 192, 192, 192, 192, 197, 198, 197, 199, 202, 202, 202, 194, 194, 201, 204, 201, 196, 192, 181, 176, 177, 184, 192, 199, 203, 205, 202, 187, 180, 184, 183, 189, 201, 194, 181, 175, 164, 154, 157, 161, 154, 153, 158, 157, 166, 173, 174, 169, 158, 150, 147, 151, 155, 151, 140, 160, 182, 151, 57, 71, 75, 67, 71, 60, 51, 50, 113, 127, 44, 35, 29, 27, 27, 31, 33, 31, 30, 33, 34, 32, 27, 26, 29, 33, 37, 38, 39, 39, 37, 33, 31, 31, 28, 33, 35, 35, 33, 35, 38, 32, 30, 33, 31, 24, 29, 142, 149, 97, 59, 49, 40, 54, 76, 71, 65, 70, 68, 73, 71, 55, 63, 47, 67, 65, 126, 142, 136, 153, 147, 157, 149, 156, 156, 159, 165, 167, 169, 171, 173, 175, 175, 180, 180, 179, 178, 178, 178, 177, 174, 175, 177, 181, 184, 188, 190, 196, 197, 200, 202, 200, 201, 203, 205, 197, 192, 194, 193, 195, 203, 213, 214, 216, 219, 222, 223, 221, 222, 221, 217, 210, 203, 199, 197, 200, 198, 194, 192, 192, 192, 191, 195, 195, 196, 198, 198, 195, 192, 193, 195, 197, 197, 196, 196, 196, 194, 197, 199, 199, 197, 196, 197, 195, 201, 206, 204, 197, 191, 189, 191, 194, 195, 196, 194, 191, 187, 185, 185, 185, 187, 189, 192, 194, 199, 205, 210, 207, 202, 204, 213, 214, 213, 210, 207, 207, 210, 214, 212, 205, 197, 200, 209, 213, 209, 208, 205, 199, 193, 190, 189, 189, 191, 191, 191, 193, 197, 199, 198, 188, 187, 194, 198, 198, 196, 195, 197, 199, 196, 188, 182, 187, 201, 211, 212, 205, 205, 210, 204, 205, 210, 196, 177, 167, 161, 157, 158, 159, 151, 152, 159, 156, 160, 167, 173, 171, 161, 152, 151, 153, 156, 157, 154, 160, 160, 153, 63, 74, 77, 67, 66, 56, 58, 57, 106, 112, 33, 32, 30, 29, 30, 30, 32, 33, 32, 34, 36, 34, 29, 27, 28, 31, 34, 32, 34, 35, 33, 32, 32, 34, 34, 33, 33, 34, 35, 35, 37, 34, 27, 32, 32, 29, 21, 128, 154, 104, 60, 55, 43, 57, 72, 70, 61, 72, 66, 71, 68, 62, 61, 42, 71, 71, 162, 184, 171, 166, 161, 169, 157, 164, 166, 169, 173, 174, 174, 175, 175, 175, 176, 182, 182, 182, 182, 182, 182, 182, 180, 180, 182, 185, 187, 189, 190, 198, 198, 200, 202, 199, 198, 201, 202, 201, 201, 205, 204, 201, 201, 202, 198, 196, 196, 198, 201, 202, 203, 203, 203, 201, 200, 200, 202, 203, 201, 199, 199, 201, 201, 200, 193, 191, 192, 194, 197, 196, 195, 197, 198, 199, 198, 196, 196, 198, 198, 199, 201, 200, 198, 197, 197, 199, 196, 192, 190, 192, 195, 197, 202, 200, 195, 192, 192, 195, 198, 191, 190, 192, 194, 194, 193, 192, 195, 201, 208, 209, 208, 207, 209, 209, 210, 209, 207, 207, 208, 212, 210, 210, 210, 204, 199, 199, 204, 204, 202, 202, 202, 202, 203, 204, 201, 198, 198, 197, 195, 191, 187, 185, 185, 187, 191, 194, 192, 189, 192, 188, 180, 182, 191, 200, 203, 208, 210, 203, 201, 205, 201, 202, 197, 183, 170, 162, 160, 159, 163, 162, 152, 155, 164, 157, 157, 163, 170, 170, 162, 155, 153, 154, 153, 155, 158, 159, 156, 158, 79, 68, 70, 72, 62, 59, 54, 64, 107, 112, 33, 31, 28, 29, 31, 29, 30, 33, 33, 33, 33, 31, 30, 30, 31, 32, 32, 37, 38, 37, 33, 30, 31, 35, 39, 34, 32, 32, 35, 36, 35, 35, 24, 30, 31, 31, 17, 117, 160, 112, 63, 60, 46, 56, 67, 64, 55, 71, 64, 68, 68, 68, 64, 41, 69, 68, 172, 197, 179, 194, 188, 191, 171, 172, 172, 174, 179, 180, 179, 179, 178, 178, 178, 185, 185, 185, 186, 186, 186, 186, 184, 185, 186, 186, 188, 189, 190, 199, 197, 201, 206, 205, 206, 212, 207, 197, 192, 196, 201, 199, 194, 197, 199, 201, 203, 203, 199, 194, 194, 194, 194, 193, 192, 194, 197, 200, 197, 195, 197, 199, 199, 197, 206, 204, 200, 197, 197, 195, 193, 193, 195, 196, 195, 194, 196, 200, 195, 195, 195, 194, 195, 198, 202, 203, 199, 197, 198, 202, 201, 196, 195, 193, 191, 190, 193, 198, 203, 196, 196, 202, 205, 202, 196, 190, 187, 189, 196, 209, 219, 219, 213, 212, 213, 213, 210, 205, 205, 207, 207, 205, 206, 208, 208, 201, 190, 187, 190, 195, 199, 200, 198, 194, 198, 200, 201, 203, 203, 199, 194, 197, 199, 199, 203, 206, 203, 196, 195, 203, 209, 205, 195, 193, 198, 207, 215, 220, 225, 225, 205, 192, 180, 175, 173, 167, 161, 159, 165, 165, 156, 159, 169, 161, 157, 163, 169, 168, 162, 157, 155, 154, 152, 148, 150, 157, 174, 174, 95, 57, 61, 80, 64, 65, 47, 68, 113, 122, 40, 32, 24, 27, 32, 29, 29, 32, 34, 32, 28, 27, 30, 34, 35, 34, 32, 35, 34, 34, 33, 32, 32, 31, 32, 30, 31, 33, 35, 34, 33, 26, 36, 36, 35, 38, 26, 98, 180, 122, 67, 60, 41, 62, 65, 55, 73, 65, 69, 68, 55, 61, 54, 53, 64, 69, 170, 212, 179, 200, 197, 201, 193, 186, 184, 186, 186, 182, 178, 180, 184, 184, 181, 185, 187, 189, 192, 193, 195, 197, 187, 183, 188, 193, 187, 193, 190, 189, 200, 199, 197, 200, 199, 203, 204, 206, 191, 189, 200, 199, 201, 203, 203, 200, 199, 197, 197, 197, 198, 198, 198, 198, 200, 202, 204, 201, 200, 197, 195, 195, 195, 196, 198, 198, 198, 199, 199, 200, 200, 200, 197, 195, 196, 199, 198, 196, 197, 199, 198, 194, 195, 198, 197, 196, 193, 194, 198, 199, 199, 202, 214, 214, 207, 201, 199, 199, 201, 195, 196, 201, 205, 205, 201, 197, 199, 197, 193, 195, 202, 210, 215, 222, 219, 212, 210, 212, 211, 208, 207, 210, 212, 211, 208, 204, 203, 200, 198, 198, 197, 196, 195, 195, 192, 191, 190, 188, 188, 191, 196, 206, 204, 196, 198, 205, 208, 205, 202, 200, 198, 197, 201, 208, 215, 220, 224, 226, 219, 205, 191, 181, 175, 173, 171, 165, 160, 157, 158, 157, 156, 156, 158, 158, 161, 171, 181, 173, 157, 149, 149, 149, 151, 154, 153, 159, 151, 155, 107, 50, 65, 71, 69, 57, 44, 63, 104, 146, 66, 33, 25, 39, 24, 29, 30, 35, 35, 33, 30, 27, 28, 29, 29, 29, 29, 39, 38, 38, 36, 35, 34, 34, 34, 36, 34, 31, 30, 33, 39, 34, 35, 30, 30, 35, 23, 78, 169, 116, 70, 58, 40, 62, 68, 57, 75, 66, 70, 69, 57, 65, 56, 56, 69, 64, 148, 199, 192, 206, 197, 202, 199, 198, 196, 193, 189, 190, 191, 189, 187, 187, 189, 190, 193, 196, 197, 196, 196, 197, 200, 195, 202, 212, 209, 194, 190, 196, 200, 197, 199, 200, 197, 209, 207, 196, 195, 204, 206, 205, 204, 205, 205, 204, 204, 202, 201, 200, 202, 202, 201, 200, 200, 200, 201, 200, 200, 199, 199, 200, 201, 203, 197, 196, 197, 198, 199, 200, 201, 200, 200, 200, 198, 195, 193, 192, 197, 199, 197, 193, 194, 196, 196, 190, 192, 197, 200, 197, 199, 209, 224, 224, 217, 209, 204, 200, 199, 192, 191, 194, 197, 197, 196, 195, 198, 202, 205, 199, 193, 194, 199, 202, 206, 213, 219, 221, 218, 212, 209, 210, 212, 210, 206, 203, 205, 203, 202, 201, 200, 200, 199, 199, 200, 201, 202, 199, 195, 197, 203, 206, 203, 200, 206, 217, 218, 211, 207, 207, 208, 209, 210, 211, 212, 213, 208, 199, 195, 193, 186, 175, 170, 169, 166, 161, 156, 152, 153, 154, 154, 156, 160, 162, 169, 181, 185, 174, 159, 153, 154, 152, 153, 157, 157, 164, 157, 159, 110, 53, 63, 69, 66, 52, 39, 65, 103, 126, 117, 38, 31, 36, 38, 32, 29, 30, 32, 33, 31, 28, 29, 29, 29, 29, 29, 38, 38, 37, 37, 36, 36, 36, 36, 37, 36, 33, 31, 33, 36, 32, 35, 33, 33, 34, 25, 63, 168, 118, 82, 60, 40, 60, 69, 57, 76, 68, 69, 69, 59, 70, 61, 58, 77, 65, 127, 185, 201, 214, 204, 213, 208, 208, 207, 205, 200, 199, 197, 194, 192, 193, 195, 196, 201, 206, 205, 201, 199, 199, 196, 193, 203, 223, 228, 198, 191, 202, 198, 195, 199, 197, 194, 211, 209, 190, 206, 225, 223, 225, 223, 222, 223, 225, 227, 226, 225, 224, 221, 222, 226, 231, 236, 240, 243, 240, 239, 237, 234, 232, 230, 229, 228, 227, 223, 218, 213, 209, 207, 205, 207, 210, 208, 202, 199, 199, 199, 201, 199, 195, 195, 198, 197, 192, 195, 206, 217, 220, 224, 232, 232, 231, 228, 222, 213, 205, 198, 199, 198, 194, 193, 194, 196, 200, 203, 198, 192, 193, 197, 197, 192, 196, 195, 196, 210, 225, 229, 221, 215, 210, 205, 206, 209, 209, 204, 203, 201, 198, 195, 198, 201, 204, 206, 208, 207, 207, 206, 205, 204, 199, 201, 209, 219, 223, 217, 208, 197, 194, 195, 196, 193, 190, 187, 189, 186, 180, 182, 188, 189, 182, 174, 170, 168, 162, 157, 155, 155, 158, 160, 162, 168, 171, 176, 188, 187, 174, 162, 158, 157, 154, 153, 157, 159, 166, 159, 162, 112, 55, 68, 69, 58, 59, 50, 72, 103, 88, 92, 85, 25, 29, 31, 35, 30, 26, 30, 33, 32, 30, 29, 30, 30, 30, 30, 33, 33, 33, 34, 34, 35, 35, 35, 33, 33, 36, 37, 35, 30, 25, 35, 36, 34, 28, 22, 43, 164, 114, 86, 58, 41, 62, 71, 60, 78, 69, 68, 67, 60, 73, 64, 53, 81, 71, 115, 171, 202, 202, 195, 210, 201, 201, 207, 212, 212, 206, 199, 196, 196, 197, 197, 202, 207, 211, 208, 203, 201, 202, 201, 195, 207, 229, 235, 207, 196, 199, 198, 196, 200, 197, 193, 207, 211, 197, 210, 229, 230, 233, 230, 229, 230, 232, 234, 235, 235, 235, 236, 236, 235, 233, 231, 229, 228, 227, 228, 231, 234, 237, 240, 241, 240, 240, 239, 238, 238, 237, 236, 235, 237, 236, 228, 217, 207, 202, 202, 204, 202, 198, 200, 202, 201, 201, 201, 208, 219, 223, 221, 221, 221, 224, 230, 232, 229, 222, 215, 207, 202, 198, 195, 195, 196, 199, 199, 198, 196, 194, 194, 196, 198, 198, 198, 198, 198, 202, 211, 221, 228, 233, 233, 224, 213, 210, 215, 217, 213, 206, 199, 198, 201, 204, 206, 205, 203, 206, 208, 206, 200, 197, 204, 215, 220, 215, 205, 199, 192, 189, 190, 190, 190, 190, 190, 188, 187, 187, 188, 187, 184, 180, 173, 168, 164, 159, 155, 155, 157, 160, 162, 166, 173, 176, 181, 190, 189, 175, 162, 158, 157, 153, 150, 154, 157, 165, 160, 164, 114, 55, 68, 70, 60, 69, 45, 69, 121, 93, 35, 117, 16, 23, 22, 32, 27, 27, 31, 33, 31, 29, 29, 30, 30, 30, 30, 33, 33, 32, 32, 31, 31, 30, 32, 31, 31, 33, 34, 34, 33, 27, 32, 31, 30, 25, 25, 31, 166, 113, 88, 54, 43, 64, 74, 61, 79, 69, 66, 64, 58, 73, 61, 47, 84, 73, 100, 157, 203, 202, 189, 203, 193, 196, 204, 209, 214, 212, 208, 204, 200, 199, 199, 202, 207, 210, 206, 199, 198, 201, 205, 198, 207, 225, 227, 214, 197, 194, 201, 201, 201, 201, 196, 202, 206, 205, 205, 215, 226, 228, 228, 229, 228, 227, 227, 226, 226, 226, 222, 223, 225, 227, 228, 229, 228, 227, 226, 226, 223, 220, 217, 214, 217, 218, 220, 222, 225, 228, 228, 226, 226, 227, 225, 220, 211, 204, 203, 205, 204, 200, 202, 206, 206, 205, 202, 203, 207, 206, 203, 205, 208, 212, 220, 225, 228, 226, 223, 212, 210, 212, 211, 208, 201, 196, 195, 199, 203, 199, 193, 192, 197, 195, 198, 201, 196, 190, 194, 204, 209, 205, 200, 205, 216, 222, 222, 216, 212, 210, 208, 207, 207, 207, 206, 205, 204, 202, 201, 202, 204, 210, 212, 210, 207, 203, 198, 195, 196, 196, 195, 192, 188, 183, 180, 173, 172, 177, 180, 182, 182, 182, 176, 171, 169, 163, 162, 163, 167, 170, 172, 175, 181, 181, 179, 184, 186, 176, 160, 155, 152, 149, 146, 151, 155, 164, 161, 166, 116, 58, 65, 71, 63, 66, 42, 75, 116, 88, 34, 102, 68, 30, 30, 29, 28, 33, 34, 33, 30, 28, 28, 30, 31, 31, 31, 36, 35, 34, 32, 31, 28, 28, 31, 31, 32, 30, 29, 33, 37, 31, 29, 25, 27, 29, 34, 38, 176, 118, 93, 55, 46, 61, 71, 64, 78, 69, 65, 61, 56, 70, 58, 45, 82, 72, 86, 148, 206, 218, 205, 207, 197, 199, 204, 206, 213, 215, 217, 210, 200, 199, 199, 199, 204, 206, 199, 195, 195, 198, 197, 192, 199, 212, 212, 212, 195, 191, 203, 203, 202, 203, 201, 200, 200, 207, 199, 204, 222, 226, 229, 233, 233, 229, 225, 224, 224, 222, 221, 220, 220, 219, 217, 215, 212, 213, 214, 216, 218, 219, 219, 219, 222, 222, 220, 218, 217, 215, 213, 214, 213, 213, 216, 215, 209, 201, 201, 204, 203, 201, 203, 206, 206, 202, 201, 202, 203, 201, 206, 216, 211, 209, 212, 213, 214, 215, 215, 215, 219, 227, 231, 227, 215, 203, 200, 197, 194, 198, 201, 198, 190, 190, 189, 188, 195, 200, 197, 189, 189, 194, 196, 192, 188, 191, 199, 213, 221, 223, 224, 220, 213, 208, 207, 209, 207, 200, 196, 201, 212, 221, 215, 200, 195, 198, 199, 196, 191, 188, 189, 187, 183, 178, 173, 172, 172, 173, 178, 183, 186, 186, 184, 182, 180, 176, 176, 179, 182, 187, 189, 190, 190, 184, 177, 177, 182, 175, 161, 154, 152, 146, 144, 150, 155, 162, 159, 165, 120, 61, 68, 73, 57, 58, 55, 88, 90, 52, 52, 100, 135, 49, 35, 32, 33, 35, 35, 32, 30, 28, 29, 30, 31, 31, 31, 34, 36, 37, 36, 34, 34, 35, 34, 34, 34, 33, 32, 32, 32, 26, 29, 31, 28, 26, 24, 62, 169, 108, 86, 51, 45, 48, 68, 70, 67, 66, 64, 59, 58, 64, 68, 50, 68, 77, 78, 141, 201, 210, 227, 205, 201, 196, 201, 207, 221, 212, 211, 208, 199, 197, 195, 200, 201, 199, 195, 195, 196, 193, 195, 197, 199, 201, 201, 200, 199, 195, 197, 195, 195, 200, 204, 200, 203, 205, 203, 201, 212, 222, 222, 225, 231, 228, 220, 223, 228, 224, 222, 221, 220, 221, 223, 222, 220, 219, 219, 219, 219, 219, 219, 219, 220, 219, 218, 218, 218, 218, 219, 220, 217, 213, 213, 214, 211, 205, 202, 203, 203, 203, 204, 203, 203, 204, 204, 205, 206, 208, 210, 210, 215, 217, 218, 218, 219, 220, 222, 218, 215, 215, 219, 224, 224, 222, 219, 214, 206, 198, 192, 187, 182, 186, 189, 191, 192, 192, 192, 190, 189, 189, 190, 193, 195, 195, 193, 189, 193, 204, 215, 221, 223, 223, 224, 218, 207, 202, 205, 209, 208, 202, 198, 197, 199, 200, 200, 199, 198, 194, 188, 182, 178, 174, 170, 170, 170, 170, 173, 177, 179, 179, 178, 179, 179, 180, 182, 184, 186, 189, 187, 183, 182, 176, 172, 173, 175, 168, 162, 165, 162, 153, 152, 162, 158, 151, 145, 157, 129, 60, 73, 76, 58, 56, 59, 77, 95, 56, 31, 152, 114, 86, 27, 38, 31, 33, 31, 28, 33, 31, 33, 30, 30, 31, 32, 35, 36, 38, 36, 34, 34, 35, 34, 34, 34, 33, 33, 33, 33, 28, 28, 33, 33, 27, 25, 74, 164, 91, 77, 53, 44, 50, 69, 62, 61, 62, 62, 59, 59, 63, 66, 51, 67, 74, 71, 128, 190, 209, 225, 206, 203, 196, 199, 206, 210, 220, 210, 210, 206, 186, 197, 210, 202, 198, 199, 197, 195, 195, 195, 196, 198, 200, 200, 199, 198, 196, 197, 196, 196, 200, 204, 202, 205, 206, 202, 199, 206, 218, 226, 224, 228, 225, 219, 220, 223, 219, 219, 218, 217, 220, 222, 222, 220, 218, 218, 218, 218, 218, 218, 218, 217, 217, 216, 217, 217, 218, 219, 220, 217, 213, 212, 212, 208, 202, 199, 198, 199, 201, 202, 202, 202, 203, 204, 205, 206, 208, 209, 211, 216, 217, 216, 214, 214, 214, 215, 214, 214, 211, 209, 211, 218, 228, 239, 240, 232, 219, 205, 193, 186, 192, 195, 196, 196, 194, 190, 187, 186, 186, 187, 189, 193, 194, 193, 189, 189, 192, 199, 205, 211, 216, 216, 206, 195, 192, 199, 200, 193, 186, 190, 197, 200, 197, 197, 198, 195, 190, 184, 180, 175, 172, 168, 166, 165, 165, 167, 170, 171, 171, 173, 174, 174, 175, 178, 180, 182, 184, 182, 179, 178, 173, 170, 172, 170, 165, 165, 170, 166, 156, 154, 153, 145, 150, 153, 160, 124, 59, 73, 77, 59, 69, 61, 72, 96, 57, 24, 71, 100, 70, 49, 27, 29, 35, 29, 36, 39, 26, 31, 32, 30, 31, 32, 36, 38, 39, 37, 34, 34, 34, 34, 34, 34, 34, 34, 34, 33, 32, 28, 35, 35, 23, 19, 74, 175, 93, 83, 62, 46, 52, 69, 56, 57, 58, 59, 60, 61, 62, 63, 54, 68, 74, 68, 117, 185, 208, 223, 205, 206, 198, 197, 203, 208, 218, 211, 205, 208, 206, 199, 199, 205, 203, 198, 198, 198, 193, 195, 196, 197, 198, 198, 197, 197, 197, 197, 196, 197, 199, 203, 206, 205, 203, 203, 201, 201, 207, 217, 232, 234, 229, 221, 219, 220, 218, 216, 217, 216, 218, 220, 221, 220, 218, 218, 217, 217, 217, 217, 217, 216, 215, 214, 213, 214, 214, 215, 217, 216, 214, 212, 211, 208, 204, 201, 201, 202, 202, 201, 201, 200, 203, 204, 204, 205, 208, 210, 213, 218, 216, 215, 213, 213, 211, 209, 210, 214, 216, 217, 216, 214, 214, 219, 227, 234, 231, 225, 217, 214, 206, 202, 200, 199, 196, 194, 193, 195, 194, 194, 196, 199, 199, 198, 196, 194, 193, 192, 193, 195, 197, 192, 186, 183, 187, 193, 196, 195, 188, 187, 191, 192, 192, 192, 192, 190, 186, 180, 175, 172, 169, 166, 163, 162, 161, 162, 165, 165, 164, 165, 166, 167, 168, 170, 172, 174, 177, 177, 175, 175, 171, 168, 171, 174, 168, 168, 180, 189, 190, 194, 188, 166, 163, 164, 161, 118, 59, 70, 74, 60, 62, 56, 70, 79, 40, 40, 30, 60, 42, 107, 48, 27, 34, 32, 33, 38, 29, 32, 31, 30, 32, 32, 38, 39, 39, 37, 35, 34, 34, 34, 34, 34, 34, 35, 35, 35, 31, 30, 37, 37, 27, 23, 73, 175, 101, 91, 65, 49, 52, 70, 57, 58, 57, 56, 60, 63, 62, 59, 58, 70, 76, 66, 108, 181, 206, 220, 206, 208, 198, 194, 200, 212, 211, 213, 199, 206, 227, 206, 190, 204, 206, 197, 198, 201, 193, 195, 195, 195, 195, 195, 195, 195, 198, 196, 196, 198, 198, 202, 209, 204, 199, 202, 206, 201, 197, 204, 230, 233, 229, 224, 222, 221, 220, 218, 217, 216, 218, 220, 221, 219, 217, 217, 217, 217, 217, 216, 216, 216, 216, 214, 213, 213, 213, 213, 217, 217, 216, 215, 212, 209, 207, 205, 205, 204, 204, 202, 200, 198, 203, 203, 204, 204, 208, 211, 214, 216, 215, 214, 216, 217, 213, 207, 200, 198, 197, 201, 206, 210, 212, 219, 224, 224, 220, 218, 218, 221, 222, 219, 213, 207, 201, 198, 197, 199, 197, 195, 196, 197, 197, 196, 195, 195, 195, 196, 195, 194, 193, 190, 189, 192, 193, 194, 196, 198, 194, 188, 184, 184, 188, 189, 185, 183, 179, 175, 171, 168, 165, 162, 161, 160, 159, 160, 162, 163, 162, 162, 162, 162, 164, 166, 168, 170, 173, 173, 172, 173, 171, 170, 174, 177, 174, 177, 197, 212, 215, 219, 214, 189, 180, 185, 178, 124, 62, 70, 77, 72, 51, 60, 77, 71, 36, 65, 45, 33, 45, 152, 69, 29, 32, 34, 28, 34, 36, 34, 29, 31, 32, 33, 38, 40, 40, 37, 35, 33, 34, 34, 34, 34, 35, 35, 36, 36, 29, 33, 38, 37, 32, 27, 66, 166, 110, 96, 62, 49, 49, 70, 64, 63, 57, 55, 60, 64, 62, 56, 59, 69, 74, 59, 94, 171, 205, 219, 206, 210, 198, 191, 198, 208, 213, 212, 203, 204, 216, 219, 210, 200, 197, 202, 202, 198, 196, 195, 195, 194, 194, 194, 194, 195, 199, 196, 196, 198, 198, 202, 211, 205, 194, 198, 209, 205, 197, 202, 207, 213, 220, 225, 226, 224, 221, 221, 220, 218, 220, 221, 220, 219, 218, 218, 218, 217, 217, 217, 217, 217, 217, 217, 217, 219, 220, 222, 224, 224, 222, 218, 213, 209, 207, 206, 206, 206, 204, 203, 201, 200, 203, 204, 203, 204, 207, 211, 215, 216, 213, 213, 215, 212, 202, 190, 178, 175, 172, 173, 184, 204, 222, 222, 220, 217, 217, 218, 221, 223, 230, 232, 228, 221, 213, 206, 201, 201, 199, 197, 196, 198, 199, 199, 197, 197, 197, 196, 192, 188, 185, 188, 190, 190, 192, 193, 196, 197, 191, 187, 186, 187, 186, 184, 182, 179, 176, 170, 167, 165, 162, 159, 158, 157, 156, 158, 160, 162, 161, 162, 163, 163, 164, 166, 169, 170, 173, 172, 173, 175, 175, 173, 178, 180, 183, 198, 213, 203, 181, 167, 160, 159, 192, 211, 179, 107, 59, 72, 70, 75, 42, 66, 77, 76, 51, 51, 45, 25, 75, 128, 33, 26, 33, 33, 33, 38, 33, 33, 30, 32, 33, 33, 37, 38, 38, 37, 35, 34, 35, 35, 34, 34, 34, 35, 36, 36, 30, 36, 35, 33, 33, 22, 59, 165, 120, 96, 64, 48, 46, 67, 69, 67, 59, 55, 59, 64, 57, 49, 64, 63, 75, 58, 78, 171, 197, 218, 210, 211, 201, 190, 199, 201, 211, 208, 209, 205, 198, 217, 222, 202, 191, 204, 205, 194, 197, 196, 195, 194, 193, 193, 194, 194, 196, 195, 195, 197, 196, 199, 205, 203, 195, 197, 204, 204, 199, 201, 194, 197, 209, 221, 228, 227, 223, 227, 227, 225, 224, 222, 221, 220, 218, 219, 220, 221, 220, 218, 217, 217, 219, 221, 226, 231, 233, 234, 234, 232, 225, 218, 212, 208, 208, 208, 208, 208, 206, 202, 201, 201, 198, 199, 204, 203, 205, 210, 217, 218, 219, 221, 222, 216, 204, 191, 190, 190, 181, 170, 174, 191, 215, 214, 214, 216, 220, 221, 218, 215, 212, 212, 214, 217, 219, 217, 215, 210, 207, 203, 203, 205, 206, 204, 198, 197, 199, 200, 200, 198, 196, 199, 198, 194, 193, 193, 192, 188, 184, 185, 189, 189, 184, 180, 179, 175, 172, 167, 164, 162, 160, 159, 158, 158, 158, 160, 162, 164, 164, 168, 170, 170, 171, 172, 174, 176, 177, 169, 176, 174, 183, 174, 187, 182, 195, 210, 189, 191, 189, 194, 185, 189, 206, 189, 163, 92, 58, 69, 60, 70, 38, 59, 77, 80, 53, 26, 31, 28, 123, 86, 25, 34, 31, 34, 34, 40, 29, 33, 32, 33, 34, 35, 35, 35, 35, 34, 34, 34, 33, 33, 32, 32, 32, 33, 35, 37, 27, 33, 35, 36, 37, 18, 65, 148, 113, 85, 66, 47, 44, 63, 68, 67, 60, 57, 58, 65, 55, 45, 72, 56, 80, 65, 65, 180, 184, 215, 214, 210, 206, 192, 200, 200, 207, 205, 207, 206, 200, 205, 213, 214, 198, 198, 205, 194, 192, 197, 196, 195, 194, 194, 194, 195, 193, 194, 195, 196, 196, 196, 197, 198, 200, 200, 199, 201, 201, 197, 199, 200, 202, 209, 218, 226, 231, 239, 241, 238, 231, 223, 219, 219, 227, 229, 231, 229, 224, 218, 213, 213, 215, 219, 227, 231, 231, 227, 218, 212, 205, 200, 198, 199, 201, 199, 197, 192, 185, 186, 194, 206, 213, 208, 200, 199, 207, 214, 218, 223, 228, 227, 217, 208, 210, 221, 219, 212, 192, 176, 176, 180, 194, 202, 214, 217, 220, 224, 219, 219, 219, 217, 216, 217, 220, 220, 218, 217, 216, 213, 208, 203, 200, 199, 205, 210, 212, 210, 205, 202, 202, 199, 197, 195, 194, 193, 190, 187, 186, 186, 188, 187, 183, 178, 174, 171, 168, 165, 164, 162, 160, 160, 161, 161, 162, 163, 166, 166, 167, 174, 177, 176, 175, 176, 178, 181, 180, 165, 178, 172, 191, 175, 197, 181, 206, 217, 166, 197, 211, 212, 185, 194, 201, 159, 150, 86, 70, 75, 67, 70, 41, 55, 79, 72, 47, 28, 32, 65, 127, 37, 30, 31, 24, 37, 27, 36, 31, 35, 32, 34, 35, 36, 36, 36, 34, 33, 32, 30, 30, 29, 29, 29, 30, 33, 35, 37, 30, 27, 35, 39, 36, 22, 79, 127, 110, 86, 63, 43, 44, 61, 67, 65, 60, 56, 60, 75, 63, 53, 72, 56, 75, 68, 61, 172, 186, 210, 211, 212, 212, 195, 192, 203, 214, 206, 202, 211, 210, 207, 210, 216, 206, 199, 202, 197, 192, 197, 196, 195, 194, 194, 194, 195, 195, 194, 194, 194, 194, 196, 197, 197, 200, 201, 201, 205, 206, 202, 201, 200, 197, 196, 200, 210, 220, 223, 226, 229, 228, 227, 225, 225, 227, 230, 235, 241, 246, 247, 246, 246, 244, 238, 231, 221, 210, 202, 196, 195, 196, 196, 197, 199, 200, 195, 194, 192, 186, 181, 181, 185, 189, 194, 201, 203, 205, 209, 213, 215, 208, 200, 198, 203, 211, 217, 209, 203, 195, 198, 199, 186, 182, 200, 215, 217, 219, 225, 221, 221, 220, 219, 219, 222, 225, 226, 225, 223, 225, 227, 219, 209, 207, 212, 223, 227, 224, 213, 203, 201, 206, 203, 199, 195, 193, 192, 191, 190, 189, 189, 190, 188, 184, 178, 173, 170, 168, 166, 165, 163, 162, 162, 165, 166, 166, 167, 167, 168, 168, 175, 178, 176, 175, 175, 177, 179, 177, 173, 175, 175, 185, 184, 193, 189, 215, 194, 171, 205, 206, 191, 193, 192, 171, 161, 151, 86, 65, 69, 72, 65, 44, 63, 76, 64, 42, 23, 37, 144, 82, 30, 32, 33, 26, 33, 29, 35, 32, 33, 30, 32, 33, 34, 36, 36, 35, 35, 35, 34, 34, 32, 32, 31, 31, 33, 35, 36, 37, 27, 32, 33, 31, 25, 92, 126, 122, 105, 72, 44, 44, 62, 69, 64, 61, 55, 59, 81, 65, 53, 67, 55, 69, 71, 57, 162, 189, 201, 207, 215, 219, 203, 189, 204, 218, 209, 202, 213, 213, 201, 202, 218, 221, 209, 201, 198, 195, 197, 196, 195, 194, 194, 194, 195, 196, 195, 194, 194, 195, 196, 197, 203, 205, 206, 206, 209, 210, 206, 204, 200, 193, 189, 189, 190, 191, 191, 194, 199, 203, 206, 207, 207, 204, 203, 201, 199, 196, 194, 192, 191, 192, 194, 195, 196, 195, 194, 195, 197, 201, 203, 203, 201, 200, 204, 206, 204, 200, 196, 193, 193, 183, 182, 185, 188, 192, 195, 197, 196, 197, 194, 188, 177, 170, 168, 162, 157, 151, 152, 151, 156, 183, 224, 238, 232, 229, 233, 229, 229, 227, 226, 226, 227, 228, 228, 228, 225, 225, 226, 222, 219, 220, 224, 223, 218, 209, 201, 199, 202, 207, 205, 199, 194, 191, 190, 191, 191, 191, 191, 191, 188, 183, 178, 174, 171, 170, 168, 167, 167, 166, 166, 168, 169, 169, 169, 169, 168, 168, 173, 175, 173, 172, 173, 174, 177, 176, 181, 180, 187, 183, 191, 189, 194, 221, 182, 189, 219, 204, 179, 198, 189, 163, 175, 154, 84, 64, 69, 64, 62, 54, 61, 95, 74, 28, 18, 50, 132, 42, 21, 35, 37, 29, 30, 32, 34, 33, 30, 29, 30, 31, 32, 35, 35, 35, 36, 36, 36, 37, 35, 34, 32, 32, 32, 34, 35, 32, 29, 34, 34, 30, 16, 75, 125, 122, 112, 85, 52, 42, 56, 72, 62, 63, 55, 58, 85, 64, 49, 62, 58, 64, 73, 51, 152, 192, 196, 204, 215, 222, 213, 194, 203, 219, 212, 205, 212, 210, 199, 199, 211, 227, 218, 201, 198, 196, 197, 196, 195, 195, 195, 195, 196, 196, 197, 197, 197, 197, 196, 196, 205, 207, 204, 202, 206, 209, 207, 204, 197, 191, 191, 192, 189, 182, 186, 187, 188, 191, 193, 192, 190, 194, 195, 194, 194, 193, 193, 192, 194, 194, 195, 193, 190, 190, 191, 189, 190, 195, 197, 197, 197, 196, 194, 195, 197, 198, 200, 200, 200, 192, 185, 180, 181, 184, 185, 182, 178, 185, 194, 190, 174, 156, 146, 136, 134, 131, 124, 111, 116, 161, 199, 214, 217, 227, 238, 234, 231, 231, 231, 231, 229, 227, 226, 227, 226, 222, 218, 217, 218, 217, 213, 215, 209, 197, 195, 198, 201, 199, 198, 195, 190, 188, 190, 192, 193, 193, 192, 190, 188, 183, 180, 176, 175, 174, 173, 171, 171, 170, 169, 171, 172, 172, 172, 172, 171, 171, 174, 174, 173, 172, 173, 176, 179, 181, 189, 189, 195, 187, 194, 195, 204, 221, 183, 199, 219, 199, 185, 201, 185, 171, 182, 153, 80, 67, 71, 56, 62, 61, 59, 100, 74, 33, 27, 77, 70, 25, 23, 34, 34, 30, 28, 38, 31, 32, 27, 29, 30, 31, 32, 36, 36, 35, 35, 34, 34, 34, 31, 31, 30, 30, 32, 34, 36, 29, 34, 33, 34, 35, 19, 68, 151, 120, 93, 75, 52, 43, 56, 71, 62, 68, 59, 62, 92, 67, 49, 65, 66, 63, 73, 45, 145, 196, 193, 202, 213, 222, 220, 202, 203, 216, 210, 206, 210, 210, 210, 209, 199, 214, 217, 201, 198, 195, 197, 196, 196, 195, 195, 195, 196, 195, 197, 199, 200, 199, 197, 194, 197, 197, 193, 191, 197, 203, 204, 202, 197, 190, 187, 188, 192, 194, 196, 195, 194, 196, 199, 200, 198, 200, 201, 202, 203, 202, 201, 200, 198, 198, 199, 198, 195, 197, 201, 197, 195, 196, 197, 197, 198, 199, 195, 196, 198, 201, 201, 197, 192, 183, 185, 191, 191, 189, 187, 187, 180, 173, 174, 186, 192, 178, 155, 132, 129, 133, 140, 127, 117, 148, 182, 196, 198, 207, 223, 225, 226, 227, 229, 230, 227, 223, 222, 223, 224, 221, 216, 216, 216, 210, 202, 204, 203, 199, 197, 197, 196, 193, 192, 191, 187, 188, 189, 192, 193, 193, 192, 190, 188, 184, 181, 179, 179, 180, 178, 176, 174, 173, 172, 172, 173, 173, 173, 173, 173, 173, 176, 176, 175, 175, 178, 181, 184, 189, 192, 194, 195, 193, 196, 212, 218, 219, 186, 191, 197, 188, 204, 208, 180, 180, 171, 145, 74, 69, 70, 58, 65, 64, 75, 88, 67, 66, 29, 93, 33, 22, 37, 33, 27, 32, 30, 43, 28, 30, 26, 31, 30, 31, 32, 33, 33, 33, 33, 33, 33, 33, 31, 30, 30, 30, 31, 33, 34, 30, 38, 29, 29, 37, 18, 69, 180, 113, 105, 76, 54, 41, 61, 71, 58, 68, 62, 65, 93, 64, 56, 57, 63, 65, 76, 46, 143, 202, 200, 201, 209, 222, 225, 211, 211, 214, 209, 208, 213, 216, 215, 203, 204, 206, 211, 209, 189, 203, 195, 196, 197, 195, 194, 194, 196, 193, 196, 197, 196, 194, 194, 196, 191, 195, 190, 188, 194, 198, 202, 204, 192, 184, 185, 185, 187, 193, 196, 196, 195, 194, 192, 191, 190, 193, 194, 195, 197, 200, 201, 199, 196, 195, 194, 195, 195, 197, 199, 196, 196, 197, 198, 198, 197, 196, 198, 195, 187, 190, 202, 205, 210, 172, 148, 154, 151, 153, 159, 156, 156, 156, 165, 178, 183, 184, 188, 179, 163, 152, 155, 148, 136, 146, 181, 196, 200, 202, 204, 205, 209, 216, 219, 220, 221, 221, 221, 222, 222, 219, 215, 212, 209, 205, 200, 200, 198, 197, 198, 198, 197, 193, 193, 193, 190, 189, 190, 191, 191, 192, 191, 190, 189, 187, 186, 185, 184, 182, 181, 179, 178, 177, 175, 177, 178, 178, 176, 176, 177, 178, 179, 183, 182, 187, 185, 192, 188, 196, 194, 190, 194, 199, 204, 221, 223, 206, 189, 185, 191, 204, 212, 198, 172, 179, 168, 133, 67, 78, 70, 50, 68, 53, 86, 85, 52, 64, 64, 78, 39, 27, 40, 31, 26, 30, 30, 35, 26, 27, 25, 28, 29, 30, 31, 35, 35, 34, 34, 33, 33, 33, 33, 31, 31, 31, 31, 32, 33, 27, 35, 29, 29, 36, 17, 74, 180, 114, 130, 89, 61, 42, 61, 73, 56, 69, 64, 66, 92, 61, 60, 49, 57, 63, 76, 47, 141, 204, 205, 202, 207, 220, 227, 222, 218, 213, 208, 209, 215, 217, 214, 212, 219, 206, 204, 214, 190, 202, 198, 199, 198, 196, 196, 198, 200, 200, 196, 189, 183, 180, 180, 180, 179, 187, 185, 188, 196, 200, 209, 200, 184, 177, 185, 188, 188, 193, 200, 192, 186, 191, 200, 198, 189, 195, 197, 197, 198, 199, 198, 196, 196, 194, 193, 194, 197, 198, 198, 196, 196, 195, 197, 195, 193, 191, 191, 191, 184, 186, 200, 202, 197, 136, 141, 170, 178, 171, 165, 139, 112, 121, 170, 213, 198, 170, 177, 200, 197, 185, 180, 177, 162, 143, 142, 155, 177, 192, 195, 195, 196, 201, 202, 205, 209, 213, 216, 218, 218, 215, 211, 207, 205, 202, 200, 201, 198, 195, 197, 200, 198, 193, 194, 195, 193, 191, 190, 190, 191, 191, 192, 192, 191, 192, 192, 192, 191, 187, 184, 183, 183, 182, 180, 181, 184, 184, 183, 183, 185, 187, 184, 189, 187, 195, 189, 199, 192, 202, 198, 191, 204, 215, 216, 219, 215, 193, 188, 188, 205, 220, 207, 191, 169, 175, 170, 107, 57, 77, 64, 44, 68, 38, 66, 72, 6, 32, 124, 68, 31, 26, 34, 25, 30, 30, 31, 30, 28, 26, 25, 26, 28, 30, 31, 37, 37, 37, 35, 34, 33, 32, 33, 31, 31, 31, 31, 32, 33, 29, 30, 33, 31, 27, 18, 76, 155, 116, 136, 90, 62, 47, 61, 76, 58, 72, 67, 69, 95, 64, 59, 48, 56, 62, 74, 44, 140, 203, 203, 201, 205, 215, 226, 233, 221, 212, 207, 210, 214, 216, 216, 229, 225, 206, 202, 212, 208, 189, 204, 202, 199, 199, 199, 199, 198, 196, 189, 183, 183, 186, 189, 188, 191, 197, 194, 193, 197, 196, 204, 203, 191, 185, 189, 191, 191, 194, 192, 194, 193, 189, 184, 184, 188, 193, 194, 195, 196, 195, 195, 194, 196, 195, 194, 196, 197, 197, 195, 195, 195, 195, 196, 196, 196, 196, 192, 194, 189, 184, 196, 207, 186, 100, 143, 171, 177, 162, 173, 170, 147, 131, 145, 185, 198, 177, 158, 172, 189, 194, 185, 184, 185, 177, 160, 163, 177, 189, 195, 196, 195, 197, 198, 200, 201, 203, 206, 208, 210, 208, 204, 203, 203, 202, 201, 201, 199, 196, 197, 199, 197, 193, 194, 194, 193, 191, 190, 191, 192, 193, 193, 194, 194, 195, 196, 197, 196, 193, 190, 189, 188, 186, 185, 184, 186, 189, 189, 189, 190, 193, 190, 195, 188, 190, 186, 198, 191, 196, 197, 199, 213, 224, 220, 212, 203, 191, 191, 199, 221, 215, 197, 193, 172, 175, 167, 78, 56, 74, 65, 51, 74, 49, 67, 86, 37, 33, 112, 76, 34, 29, 24, 18, 31, 30, 30, 31, 30, 29, 27, 28, 29, 30, 30, 35, 35, 35, 35, 34, 33, 33, 33, 31, 31, 31, 31, 32, 33, 33, 30, 36, 34, 23, 19, 66, 134, 119, 134, 88, 61, 48, 58, 79, 61, 74, 69, 72, 97, 66, 61, 50, 57, 62, 74, 44, 140, 201, 198, 198, 201, 205, 218, 235, 222, 208, 205, 213, 218, 218, 223, 221, 218, 213, 211, 212, 219, 190, 206, 204, 201, 199, 197, 192, 186, 184, 186, 186, 186, 187, 190, 192, 191, 194, 191, 193, 195, 192, 200, 210, 201, 194, 193, 193, 192, 194, 196, 192, 189, 190, 193, 192, 190, 188, 190, 192, 192, 191, 191, 193, 195, 196, 196, 198, 200, 200, 198, 196, 197, 198, 201, 203, 205, 204, 199, 199, 193, 183, 190, 208, 188, 99, 127, 160, 171, 148, 153, 169, 179, 175, 160, 153, 156, 158, 152, 160, 176, 187, 184, 178, 181, 189, 186, 182, 181, 185, 192, 197, 200, 200, 200, 201, 199, 197, 197, 199, 202, 201, 199, 199, 201, 202, 201, 201, 200, 198, 199, 198, 196, 194, 194, 193, 191, 190, 190, 191, 192, 192, 192, 192, 192, 194, 197, 197, 198, 196, 193, 192, 192, 191, 189, 187, 190, 193, 192, 189, 189, 193, 194, 201, 193, 193, 191, 205, 197, 197, 205, 213, 218, 218, 212, 204, 197, 198, 208, 214, 223, 204, 189, 189, 173, 181, 157, 60, 64, 71, 67, 56, 70, 60, 67, 93, 107, 80, 75, 69, 57, 35, 23, 22, 27, 27, 25, 30, 32, 29, 28, 29, 29, 30, 32, 34, 34, 34, 34, 34, 34, 34, 33, 31, 31, 31, 31, 32, 33, 33, 33, 37, 39, 30, 29, 53, 141, 134, 131, 90, 62, 44, 55, 81, 62, 75, 70, 73, 99, 66, 62, 51, 59, 63, 74, 44, 139, 199, 193, 193, 199, 198, 206, 226, 220, 204, 204, 218, 220, 217, 224, 211, 209, 222, 222, 210, 221, 208, 204, 203, 200, 196, 190, 183, 177, 178, 183, 189, 188, 186, 187, 190, 189, 190, 189, 195, 197, 194, 204, 211, 204, 195, 190, 190, 192, 194, 194, 188, 184, 185, 187, 183, 176, 179, 183, 188, 188, 187, 188, 193, 195, 195, 197, 201, 203, 203, 200, 199, 200, 202, 203, 203, 201, 198, 198, 193, 191, 180, 181, 198, 196, 128, 94, 141, 166, 160, 148, 142, 153, 165, 184, 189, 161, 130, 122, 152, 163, 170, 184, 187, 180, 172, 181, 185, 186, 186, 187, 186, 184, 183, 189, 196, 197, 196, 195, 197, 198, 196, 195, 196, 199, 200, 199, 199, 200, 199, 198, 196, 194, 192, 193, 192, 190, 189, 189, 190, 191, 191, 190, 190, 191, 193, 194, 195, 198, 197, 194, 194, 195, 195, 193, 191, 193, 196, 193, 189, 191, 197, 202, 213, 208, 207, 207, 223, 210, 211, 223, 230, 222, 211, 207, 202, 203, 210, 227, 222, 210, 195, 187, 182, 176, 190, 128, 46, 67, 61, 56, 57, 56, 65, 70, 89, 136, 146, 124, 74, 79, 43, 24, 19, 22, 24, 21, 29, 33, 29, 28, 30, 31, 32, 33, 38, 38, 38, 36, 34, 33, 32, 33, 31, 31, 31, 31, 32, 33, 32, 35, 33, 38, 32, 28, 28, 153, 142, 122, 92, 64, 42, 57, 80, 62, 75, 71, 73, 99, 67, 61, 49, 57, 61, 72, 42, 137, 203, 193, 195, 201, 197, 199, 214, 222, 203, 204, 220, 218, 210, 218, 222, 209, 222, 223, 206, 216, 228, 203, 201, 197, 189, 182, 181, 182, 185, 183, 183, 185, 188, 190, 190, 194, 193, 192, 200, 200, 194, 205, 217, 211, 199, 189, 187, 189, 190, 189, 185, 183, 187, 191, 187, 180, 171, 176, 182, 182, 182, 185, 192, 194, 195, 198, 200, 202, 199, 196, 194, 197, 201, 203, 203, 199, 194, 194, 185, 189, 185, 179, 187, 207, 160, 79, 147, 145, 146, 145, 136, 136, 144, 162, 182, 185, 159, 123, 126, 150, 167, 170, 176, 185, 184, 188, 192, 193, 189, 184, 180, 178, 174, 181, 192, 198, 197, 196, 198, 197, 195, 193, 195, 197, 198, 198, 199, 200, 200, 198, 195, 192, 191, 192, 191, 189, 188, 188, 190, 191, 191, 191, 191, 190, 191, 192, 194, 196, 197, 196, 196, 199, 199, 198, 196, 199, 200, 197, 194, 198, 207, 218, 232, 226, 223, 218, 227, 206, 209, 226, 229, 218, 213, 215, 210, 212, 215, 230, 217, 194, 193, 188, 172, 176, 195, 94, 43, 73, 61, 49, 58, 51, 70, 88, 79, 108, 102, 91, 78, 76, 50, 23, 20, 28, 25, 21, 30, 36, 31, 30, 32, 31, 32, 33, 37, 37, 37, 34, 33, 32, 34, 34, 32, 31, 31, 31, 31, 32, 28, 39, 29, 32, 28, 30, 35, 155, 127, 130, 94, 64, 46, 58, 78, 73, 69, 72, 69, 98, 69, 54, 54, 59, 64, 71, 45, 116, 215, 205, 194, 203, 206, 202, 221, 230, 209, 216, 228, 216, 208, 217, 225, 213, 226, 212, 213, 199, 219, 214, 176, 183, 184, 182, 175, 173, 174, 176, 178, 179, 178, 182, 191, 181, 181, 185, 191, 191, 191, 197, 211, 207, 205, 182, 194, 194, 193, 215, 198, 166, 162, 165, 189, 191, 184, 185, 176, 168, 176, 192, 199, 192, 192, 194, 194, 196, 195, 195, 196, 197, 197, 197, 197, 197, 195, 194, 193, 194, 190, 182, 184, 199, 184, 92, 144, 139, 141, 139, 139, 138, 151, 145, 142, 167, 176, 157, 136, 129, 147, 159, 165, 170, 186, 193, 189, 190, 196, 194, 184, 181, 183, 179, 175, 183, 195, 201, 200, 192, 193, 198, 201, 198, 197, 198, 197, 198, 199, 197, 192, 191, 192, 191, 189, 188, 190, 193, 192, 188, 186, 191, 196, 194, 189, 188, 193, 194, 193, 193, 197, 201, 201, 197, 195, 198, 202, 199, 195, 200, 211, 224, 234, 226, 222, 223, 224, 208, 219, 222, 228, 211, 223, 216, 209, 210, 219, 203, 192, 180, 195, 182, 178, 181, 180, 85, 58, 65, 58, 55, 55, 51, 58, 62, 57, 63, 60, 56, 56, 57, 60, 52, 40, 29, 21, 23, 21, 39, 25, 27, 30, 31, 31, 30, 36, 36, 36, 34, 32, 33, 35, 34, 32, 32, 31, 31, 31, 32, 29, 35, 31, 32, 43, 16, 107, 148, 125, 134, 97, 63, 44, 56, 78, 75, 66, 68, 65, 98, 72, 56, 53, 58, 64, 74, 52, 114, 207, 200, 190, 186, 180, 183, 203, 220, 207, 205, 203, 200, 204, 202, 197, 188, 205, 204, 206, 192, 198, 221, 192, 179, 187, 186, 179, 178, 181, 178, 178, 178, 174, 173, 178, 178, 177, 181, 187, 186, 184, 184, 194, 194, 197, 176, 187, 179, 167, 167, 153, 115, 133, 142, 126, 125, 139, 154, 181, 197, 185, 171, 176, 197, 199, 196, 193, 191, 194, 197, 198, 198, 197, 196, 196, 196, 194, 193, 193, 193, 190, 184, 184, 192, 193, 132, 131, 139, 139, 136, 135, 137, 144, 138, 138, 151, 160, 173, 172, 149, 144, 143, 157, 168, 177, 184, 187, 191, 194, 192, 186, 182, 183, 185, 184, 179, 178, 184, 193, 202, 198, 191, 189, 194, 195, 194, 197, 198, 197, 194, 191, 189, 187, 188, 187, 186, 186, 189, 194, 197, 194, 190, 188, 189, 193, 196, 197, 197, 195, 195, 196, 199, 200, 199, 198, 200, 203, 201, 199, 204, 212, 224, 232, 223, 217, 218, 213, 199, 216, 218, 233, 221, 231, 217, 213, 208, 204, 190, 189, 182, 181, 173, 174, 178, 159, 64, 65, 63, 56, 50, 55, 65, 65, 50, 37, 35, 41, 48, 56, 68, 76, 77, 72, 58, 41, 32, 19, 33, 25, 27, 29, 34, 34, 33, 36, 36, 36, 34, 32, 33, 35, 34, 32, 31, 31, 31, 31, 32, 33, 33, 36, 27, 32, 16, 130, 144, 130, 129, 92, 59, 46, 64, 79, 74, 61, 61, 59, 97, 78, 62, 52, 55, 61, 71, 51, 105, 187, 175, 176, 177, 177, 182, 176, 178, 200, 218, 211, 206, 213, 208, 197, 196, 200, 206, 201, 197, 175, 219, 220, 180, 189, 184, 175, 174, 175, 171, 171, 174, 177, 179, 184, 195, 187, 182, 185, 186, 183, 181, 180, 185, 192, 184, 200, 195, 179, 158, 150, 166, 171, 156, 164, 162, 144, 125, 118, 145, 182, 196, 188, 187, 189, 192, 193, 194, 194, 195, 194, 195, 195, 195, 195, 195, 195, 196, 192, 191, 191, 188, 185, 186, 191, 182, 117, 137, 137, 137, 135, 138, 141, 141, 146, 140, 138, 170, 192, 175, 153, 126, 141, 164, 170, 174, 186, 193, 187, 184, 184, 181, 184, 188, 188, 186, 182, 180, 179, 190, 195, 196, 195, 195, 195, 197, 197, 196, 193, 193, 194, 194, 191, 188, 190, 192, 192, 190, 190, 193, 194, 196, 201, 201, 198, 196, 197, 197, 195, 192, 192, 195, 199, 202, 203, 203, 202, 203, 204, 207, 209, 216, 226, 221, 220, 218, 210, 197, 212, 207, 223, 213, 207, 189, 189, 197, 184, 177, 187, 187, 172, 179, 174, 180, 139, 40, 69, 64, 56, 49, 57, 69, 63, 47, 44, 50, 61, 67, 66, 61, 55, 55, 63, 71, 66, 52, 32, 31, 28, 26, 27, 34, 36, 35, 36, 36, 36, 34, 32, 33, 35, 34, 32, 32, 31, 31, 31, 32, 31, 29, 37, 25, 27, 98, 127, 145, 144, 134, 98, 63, 46, 63, 78, 72, 57, 56, 55, 98, 81, 66, 51, 55, 58, 69, 53, 97, 177, 160, 164, 174, 184, 194, 181, 167, 189, 224, 232, 218, 209, 201, 196, 209, 200, 202, 204, 218, 185, 197, 219, 188, 197, 195, 193, 192, 189, 188, 185, 180, 178, 184, 196, 211, 195, 179, 176, 178, 180, 182, 188, 195, 188, 176, 185, 180, 164, 143, 124, 161, 155, 143, 180, 178, 179, 182, 166, 139, 135, 154, 172, 174, 178, 183, 187, 189, 190, 189, 185, 187, 189, 191, 193, 195, 195, 198, 194, 192, 192, 190, 184, 181, 181, 203, 117, 122, 134, 141, 146, 144, 154, 159, 159, 147, 137, 157, 185, 187, 173, 129, 125, 146, 161, 173, 188, 195, 186, 182, 183, 180, 184, 185, 184, 187, 189, 187, 183, 178, 181, 190, 197, 198, 199, 201, 203, 200, 196, 195, 194, 191, 186, 186, 189, 192, 191, 188, 190, 194, 192, 194, 200, 202, 201, 202, 204, 201, 198, 195, 193, 193, 197, 201, 203, 201, 200, 201, 205, 206, 204, 205, 214, 217, 222, 219, 210, 198, 208, 191, 205, 196, 192, 184, 189, 176, 140, 132, 151, 168, 174, 197, 175, 180, 117, 35, 69, 65, 61, 61, 66, 61, 43, 36, 46, 53, 58, 55, 41, 27, 17, 17, 29, 50, 60, 62, 55, 31, 27, 22, 22, 30, 33, 34, 36, 36, 36, 34, 32, 33, 35, 34, 32, 32, 31, 31, 31, 32, 35, 31, 32, 24, 56, 171, 136, 112, 127, 120, 99, 69, 48, 58, 73, 69, 55, 54, 53, 96, 82, 62, 47, 61, 63, 73, 62, 101, 177, 169, 166, 167, 168, 181, 197, 189, 175, 191, 213, 217, 214, 208, 208, 217, 202, 202, 206, 220, 210, 189, 208, 210, 199, 195, 196, 191, 192, 191, 188, 182, 176, 181, 194, 203, 189, 174, 171, 173, 174, 176, 179, 193, 185, 179, 188, 190, 180, 128, 133, 156, 153, 148, 147, 176, 179, 169, 165, 160, 147, 139, 148, 171, 177, 178, 178, 180, 182, 183, 179, 180, 184, 187, 189, 191, 191, 193, 190, 190, 192, 189, 185, 185, 180, 195, 147, 99, 130, 145, 159, 156, 167, 176, 174, 162, 150, 161, 183, 189, 188, 151, 127, 127, 146, 171, 184, 190, 189, 187, 184, 182, 180, 182, 183, 178, 176, 182, 193, 188, 177, 171, 174, 186, 195, 197, 201, 202, 201, 200, 199, 198, 196, 197, 196, 194, 195, 201, 210, 219, 217, 207, 194, 195, 202, 206, 202, 204, 205, 205, 201, 198, 196, 198, 198, 198, 198, 200, 201, 200, 198, 197, 204, 205, 208, 201, 193, 189, 210, 194, 206, 193, 189, 189, 181, 153, 127, 118, 122, 128, 166, 186, 161, 171, 84, 46, 65, 66, 59, 59, 62, 56, 39, 43, 54, 45, 34, 28, 24, 24, 18, 13, 19, 29, 34, 48, 68, 31, 23, 18, 20, 27, 31, 33, 36, 36, 36, 34, 32, 33, 35, 34, 32, 32, 31, 31, 31, 32, 30, 34, 33, 35, 104, 157, 141, 123, 138, 118, 96, 67, 47, 54, 68, 67, 55, 55, 53, 95, 81, 60, 46, 65, 65, 71, 62, 98, 182, 174, 164, 170, 172, 168, 187, 195, 179, 179, 186, 194, 211, 221, 219, 209, 198, 205, 203, 201, 229, 197, 201, 234, 199, 192, 195, 189, 193, 190, 188, 186, 183, 183, 188, 193, 187, 183, 185, 182, 177, 173, 176, 201, 193, 186, 186, 182, 171, 114, 117, 150, 145, 148, 152, 157, 160, 167, 172, 167, 161, 154, 148, 146, 157, 172, 183, 187, 185, 181, 178, 179, 182, 184, 185, 185, 184, 183, 182, 184, 187, 187, 188, 192, 187, 182, 184, 82, 127, 145, 167, 169, 173, 177, 178, 161, 146, 166, 186, 180, 183, 165, 136, 119, 135, 167, 177, 182, 192, 192, 186, 185, 181, 176, 174, 178, 184, 185, 183, 183, 186, 184, 174, 165, 173, 190, 200, 201, 200, 193, 185, 180, 179, 177, 176, 177, 182, 187, 187, 183, 177, 182, 191, 192, 188, 188, 195, 196, 198, 202, 201, 199, 198, 198, 196, 196, 200, 200, 198, 197, 195, 194, 197, 191, 190, 183, 180, 185, 211, 198, 211, 194, 187, 181, 150, 122, 129, 127, 117, 99, 160, 171, 157, 174, 64, 62, 63, 67, 49, 51, 61, 55, 41, 47, 57, 40, 20, 16, 22, 30, 24, 14, 19, 27, 22, 35, 73, 35, 27, 22, 24, 28, 33, 35, 34, 31, 29, 27, 28, 30, 34, 45, 28, 34, 31, 41, 32, 38, 21, 7, 33, 32, 138, 156, 111, 117, 123, 126, 94, 56, 42, 62, 71, 49, 48, 52, 51, 87, 70, 49, 69, 67, 70, 75, 69, 102, 170, 166, 163, 167, 171, 173, 178, 194, 181, 183, 175, 169, 189, 237, 217, 207, 213, 199, 200, 219, 219, 224, 187, 235, 216, 202, 190, 191, 192, 190, 186, 188, 194, 195, 189, 192, 189, 188, 189, 188, 191, 197, 182, 176, 173, 168, 176, 174, 174, 149, 112, 120, 143, 152, 163, 164, 139, 154, 171, 175, 170, 161, 150, 131, 125, 136, 158, 169, 168, 167, 168, 171, 180, 185, 180, 177, 184, 192, 175, 194, 197, 187, 179, 201, 185, 149, 192, 114, 124, 149, 142, 174, 179, 176, 172, 158, 152, 167, 172, 157, 183, 208, 167, 150, 109, 147, 129, 130, 199, 196, 175, 194, 172, 189, 176, 187, 174, 182, 179, 181, 183, 183, 178, 173, 171, 172, 169, 175, 160, 160, 160, 179, 169, 170, 177, 168, 172, 170, 168, 183, 198, 178, 188, 168, 172, 188, 176, 183, 183, 189, 186, 195, 186, 187, 189, 200, 212, 217, 214, 212, 209, 205, 213, 210, 206, 197, 167, 179, 200, 193, 187, 187, 175, 150, 130, 124, 122, 113, 108, 104, 137, 147, 138, 162, 58, 61, 57, 59, 48, 55, 58, 52, 54, 57, 43, 33, 40, 32, 16, 14, 13, 10, 15, 23, 25, 14, 22, 53, 50, 37, 32, 32, 37, 40, 43, 35, 32, 29, 28, 28, 30, 34, 28, 39, 32, 35, 37, 40, 23, 53, 28, 24, 111, 180, 159, 106, 83, 115, 108, 96, 67, 50, 59, 65, 52, 52, 54, 51, 85, 73, 49, 67, 64, 69, 75, 67, 101, 171, 166, 165, 169, 173, 177, 182, 190, 196, 180, 186, 187, 170, 198, 224, 207, 200, 207, 212, 212, 211, 230, 184, 220, 223, 210, 189, 196, 199, 190, 184, 187, 189, 188, 189, 191, 189, 189, 190, 190, 190, 196, 184, 191, 191, 178, 181, 176, 171, 157, 131, 120, 128, 140, 147, 148, 135, 142, 153, 160, 169, 176, 177, 160, 138, 124, 134, 151, 163, 174, 173, 174, 181, 188, 187, 183, 184, 187, 184, 177, 182, 186, 197, 167, 179, 186, 165, 136, 121, 144, 144, 159, 162, 164, 162, 149, 142, 152, 163, 156, 175, 191, 177, 156, 110, 99, 106, 125, 180, 204, 189, 161, 180, 176, 165, 177, 180, 178, 180, 176, 172, 171, 173, 179, 181, 181, 182, 186, 176, 179, 179, 193, 193, 194, 190, 180, 187, 163, 154, 160, 159, 151, 153, 169, 170, 179, 176, 184, 187, 194, 183, 192, 186, 184, 177, 173, 171, 178, 193, 199, 195, 198, 203, 208, 211, 196, 184, 206, 217, 201, 184, 172, 149, 126, 124, 131, 124, 109, 103, 141, 118, 109, 120, 146, 58, 66, 63, 59, 52, 58, 61, 56, 53, 53, 43, 39, 46, 45, 40, 39, 32, 25, 15, 18, 23, 30, 55, 68, 64, 64, 70, 75, 77, 79, 35, 33, 30, 28, 28, 30, 34, 32, 42, 28, 27, 26, 34, 21, 21, 34, 96, 190, 170, 151, 121, 81, 139, 110, 103, 72, 48, 50, 57, 56, 57, 57, 51, 82, 78, 51, 65, 63, 70, 75, 66, 101, 171, 167, 166, 170, 174, 178, 183, 183, 202, 181, 194, 207, 183, 176, 214, 212, 195, 208, 217, 208, 211, 247, 194, 202, 229, 222, 189, 194, 201, 190, 184, 188, 187, 184, 190, 190, 189, 190, 192, 190, 189, 193, 183, 201, 203, 185, 190, 185, 170, 166, 161, 135, 124, 132, 134, 142, 140, 140, 141, 144, 153, 168, 180, 175, 160, 148, 143, 143, 152, 170, 180, 173, 171, 179, 186, 183, 173, 180, 171, 177, 174, 179, 168, 184, 158, 207, 203, 101, 113, 153, 142, 146, 151, 156, 155, 143, 136, 137, 142, 149, 171, 180, 196, 174, 131, 112, 97, 102, 87, 157, 197, 171, 170, 170, 189, 165, 174, 176, 177, 178, 176, 176, 178, 182, 185, 186, 191, 191, 184, 184, 179, 183, 192, 188, 180, 181, 177, 131, 143, 180, 182, 176, 126, 149, 155, 171, 179, 181, 189, 199, 182, 190, 190, 186, 181, 183, 186, 188, 184, 182, 183, 179, 168, 182, 195, 177, 185, 212, 208, 184, 164, 152, 131, 119, 132, 138, 117, 106, 123, 161, 106, 90, 103, 111, 50, 66, 65, 57, 55, 61, 61, 54, 48, 50, 41, 36, 40, 47, 49, 51, 56, 46, 23, 19, 27, 28, 43, 69, 69, 68, 77, 79, 78, 78, 37, 34, 31, 28, 28, 30, 33, 39, 27, 33, 29, 31, 28, 43, 4, 50, 155, 147, 93, 76, 93, 51, 127, 111, 110, 75, 47, 49, 55, 61, 60, 58, 52, 80, 81, 54, 65, 63, 72, 77, 68, 102, 170, 165, 164, 168, 172, 175, 180, 181, 189, 184, 187, 207, 216, 180, 194, 222, 209, 202, 205, 206, 212, 244, 209, 182, 220, 226, 195, 189, 195, 189, 187, 192, 191, 187, 190, 189, 188, 188, 190, 188, 187, 191, 182, 200, 201, 185, 198, 194, 176, 170, 179, 158, 135, 129, 129, 145, 134, 136, 141, 145, 151, 165, 184, 190, 181, 162, 139, 127, 150, 193, 222, 223, 211, 192, 180, 180, 186, 180, 189, 174, 180, 181, 190, 183, 197, 203, 98, 76, 93, 148, 154, 149, 155, 160, 153, 143, 137, 133, 138, 153, 167, 162, 182, 168, 148, 75, 137, 233, 188, 82, 103, 157, 170, 169, 192, 165, 177, 184, 189, 190, 191, 195, 191, 185, 185, 189, 193, 186, 185, 184, 183, 183, 197, 189, 181, 181, 144, 110, 140, 189, 190, 194, 139, 144, 149, 164, 184, 180, 184, 198, 182, 193, 194, 192, 185, 177, 170, 178, 188, 189, 186, 183, 167, 180, 193, 167, 174, 192, 178, 155, 140, 133, 130, 127, 133, 132, 109, 109, 149, 134, 99, 93, 98, 82, 52, 64, 63, 52, 53, 58, 55, 45, 42, 55, 49, 35, 34, 41, 39, 40, 58, 55, 43, 39, 34, 24, 36, 69, 71, 71, 80, 81, 80, 82, 38, 35, 32, 29, 29, 30, 32, 38, 28, 38, 32, 26, 15, 29, 26, 72, 108, 71, 63, 34, 65, 32, 93, 113, 116, 82, 49, 47, 59, 68, 60, 58, 53, 78, 83, 57, 65, 62, 73, 78, 67, 102, 170, 166, 163, 167, 169, 172, 176, 181, 176, 182, 180, 191, 210, 192, 182, 209, 217, 203, 200, 208, 209, 214, 228, 176, 199, 217, 203, 192, 190, 193, 191, 188, 188, 190, 189, 189, 186, 186, 187, 185, 184, 189, 183, 198, 200, 183, 192, 192, 185, 180, 180, 173, 153, 129, 123, 133, 135, 136, 142, 149, 150, 152, 158, 172, 177, 184, 181, 155, 123, 108, 128, 141, 154, 163, 172, 175, 168, 169, 168, 173, 162, 168, 178, 189, 111, 112, 135, 197, 135, 163, 158, 154, 160, 160, 148, 141, 142, 138, 141, 152, 157, 158, 164, 167, 170, 115, 99, 139, 183, 199, 80, 137, 181, 173, 172, 188, 196, 193, 194, 191, 193, 197, 193, 186, 186, 191, 196, 191, 192, 181, 183, 180, 189, 182, 183, 181, 110, 126, 155, 178, 174, 185, 174, 172, 166, 144, 175, 176, 175, 190, 182, 191, 190, 194, 192, 187, 180, 172, 158, 157, 173, 186, 176, 182, 191, 173, 176, 184, 163, 146, 134, 125, 130, 136, 133, 124, 116, 118, 128, 103, 90, 95, 96, 69, 65, 63, 62, 55, 56, 55, 53, 41, 39, 56, 56, 40, 33, 39, 37, 34, 45, 39, 51, 78, 60, 28, 39, 61, 62, 64, 74, 81, 83, 87, 39, 36, 32, 30, 29, 31, 33, 32, 42, 33, 31, 24, 37, 39, 43, 92, 88, 90, 81, 62, 67, 38, 68, 105, 105, 79, 53, 53, 64, 72, 59, 58, 54, 77, 83, 57, 62, 60, 72, 77, 65, 100, 173, 166, 164, 167, 169, 170, 174, 176, 173, 178, 183, 185, 186, 205, 176, 179, 210, 212, 208, 214, 210, 194, 249, 189, 188, 204, 208, 197, 192, 199, 192, 179, 182, 190, 184, 188, 185, 183, 183, 182, 183, 188, 186, 202, 205, 181, 179, 181, 192, 193, 179, 181, 168, 134, 120, 118, 142, 140, 141, 152, 154, 146, 138, 148, 158, 176, 193, 193, 193, 201, 234, 226, 194, 162, 150, 152, 153, 152, 177, 180, 166, 181, 192, 132, 66, 196, 209, 230, 178, 175, 168, 157, 161, 156, 140, 139, 145, 144, 142, 148, 156, 172, 159, 162, 163, 123, 125, 159, 228, 212, 109, 111, 165, 194, 183, 197, 185, 190, 186, 187, 189, 188, 187, 184, 184, 185, 190, 188, 193, 178, 185, 183, 187, 170, 187, 191, 84, 127, 152, 166, 175, 159, 158, 162, 175, 130, 167, 174, 166, 181, 181, 190, 184, 192, 191, 184, 179, 174, 161, 157, 170, 189, 184, 180, 183, 174, 174, 175, 156, 147, 140, 127, 136, 154, 153, 129, 130, 128, 87, 105, 90, 97, 91, 56, 70, 60, 61, 61, 63, 59, 57, 44, 34, 47, 46, 36, 27, 38, 43, 39, 35, 21, 53, 107, 77, 28, 40, 54, 60, 68, 75, 79, 82, 86, 34, 32, 30, 31, 32, 32, 31, 35, 35, 30, 24, 32, 15, 68, 77, 98, 91, 68, 73, 51, 35, 49, 55, 74, 85, 72, 60, 54, 50, 65, 58, 55, 56, 78, 93, 50, 64, 54, 77, 79, 65, 92, 178, 161, 165, 165, 160, 167, 167, 169, 171, 171, 177, 180, 166, 197, 194, 154, 204, 220, 211, 207, 210, 209, 227, 197, 170, 206, 214, 176, 201, 196, 180, 188, 188, 189, 189, 191, 191, 189, 187, 187, 186, 186, 191, 196, 185, 189, 171, 193, 179, 179, 205, 173, 183, 176, 113, 127, 156, 159, 178, 161, 158, 146, 137, 132, 157, 154, 162, 199, 203, 187, 212, 232, 207, 156, 119, 176, 157, 169, 191, 155, 182, 176, 167, 111, 54, 212, 186, 214, 187, 181, 182, 173, 158, 155, 155, 149, 151, 152, 155, 162, 156, 161, 170, 154, 134, 140, 183, 198, 200, 195, 101, 113, 172, 176, 185, 193, 187, 187, 188, 189, 188, 185, 186, 189, 190, 188, 191, 191, 194, 191, 187, 186, 194, 184, 191, 146, 88, 137, 154, 168, 169, 154, 165, 146, 173, 153, 149, 164, 176, 164, 194, 188, 192, 194, 191, 190, 182, 161, 146, 149, 164, 172, 177, 181, 169, 159, 168, 162, 150, 145, 143, 140, 174, 168, 168, 158, 133, 113, 104, 104, 85, 99, 90, 59, 61, 72, 58, 52, 49, 53, 64, 73, 65, 54, 51, 47, 38, 27, 24, 43, 51, 76, 121, 115, 58, 32, 30, 54, 57, 67, 80, 83, 81, 84, 32, 31, 29, 30, 31, 31, 32, 33, 28, 37, 37, 26, 36, 99, 97, 89, 51, 36, 25, 15, 39, 41, 32, 74, 120, 100, 60, 46, 64, 66, 59, 59, 57, 76, 95, 48, 64, 54, 75, 79, 69, 99, 166, 155, 160, 162, 159, 164, 163, 171, 171, 168, 172, 172, 170, 183, 195, 191, 198, 208, 217, 226, 214, 204, 230, 216, 171, 184, 216, 211, 185, 186, 184, 181, 186, 189, 189, 191, 190, 189, 193, 194, 188, 179, 182, 181, 181, 186, 179, 185, 180, 185, 183, 201, 135, 112, 120, 122, 162, 152, 157, 145, 154, 145, 131, 139, 139, 154, 167, 145, 121, 142, 189, 242, 233, 175, 106, 191, 164, 102, 118, 128, 164, 175, 179, 139, 73, 210, 233, 230, 192, 172, 142, 104, 87, 91, 98, 94, 94, 91, 97, 99, 98, 119, 153, 173, 187, 202, 209, 184, 165, 147, 77, 138, 179, 165, 172, 183, 181, 183, 186, 186, 185, 181, 182, 184, 185, 184, 189, 190, 192, 185, 185, 186, 187, 176, 190, 145, 75, 140, 153, 164, 163, 150, 161, 141, 166, 150, 144, 162, 176, 166, 188, 183, 185, 187, 190, 189, 177, 160, 145, 146, 154, 166, 176, 180, 167, 159, 168, 159, 137, 142, 165, 181, 180, 174, 168, 154, 137, 127, 117, 109, 87, 100, 89, 58, 61, 68, 55, 55, 54, 61, 77, 91, 97, 103, 116, 121, 121, 117, 113, 129, 126, 121, 125, 96, 45, 38, 40, 53, 48, 57, 74, 81, 80, 85, 30, 28, 27, 29, 31, 31, 32, 37, 25, 31, 28, 21, 70, 121, 95, 96, 47, 41, 26, 13, 10, 19, 19, 11, 65, 125, 104, 58, 48, 71, 64, 59, 67, 61, 75, 99, 51, 67, 53, 69, 72, 64, 96, 161, 159, 160, 163, 164, 165, 163, 162, 171, 176, 175, 165, 172, 165, 175, 213, 189, 193, 203, 217, 214, 212, 228, 237, 193, 176, 208, 229, 184, 191, 199, 184, 186, 189, 186, 190, 191, 192, 194, 191, 182, 171, 179, 166, 192, 192, 188, 172, 203, 162, 215, 204, 72, 154, 195, 145, 139, 136, 156, 148, 155, 148, 145, 131, 147, 164, 170, 151, 136, 196, 202, 213, 251, 187, 102, 55, 69, 120, 202, 244, 237, 237, 251, 237, 130, 193, 238, 225, 199, 207, 227, 239, 208, 174, 159, 154, 159, 157, 156, 174, 195, 220, 223, 202, 202, 209, 186, 150, 150, 145, 86, 160, 170, 162, 179, 176, 175, 190, 191, 190, 189, 186, 183, 183, 182, 181, 184, 186, 187, 180, 187, 191, 189, 175, 193, 149, 69, 140, 148, 155, 157, 151, 155, 134, 156, 149, 144, 162, 173, 172, 182, 182, 182, 183, 186, 185, 179, 165, 144, 132, 133, 148, 163, 173, 167, 160, 161, 142, 129, 147, 179, 204, 168, 168, 159, 145, 134, 127, 116, 111, 91, 101, 87, 59, 61, 61, 47, 51, 49, 60, 77, 90, 96, 104, 117, 122, 123, 128, 129, 133, 114, 101, 106, 85, 45, 41, 38, 48, 45, 61, 76, 81, 82, 89, 30, 28, 28, 29, 30, 32, 32, 30, 30, 34, 28, 45, 85, 81, 121, 155, 111, 73, 56, 55, 54, 91, 82, 93, 98, 69, 48, 51, 60, 59, 61, 74, 65, 76, 100, 51, 67, 51, 69, 77, 73, 103, 161, 164, 159, 159, 164, 165, 166, 164, 170, 159, 146, 135, 149, 153, 160, 200, 188, 192, 183, 189, 210, 214, 213, 240, 228, 199, 204, 231, 192, 199, 206, 191, 190, 192, 187, 186, 192, 197, 195, 189, 184, 183, 186, 194, 184, 181, 185, 175, 183, 182, 215, 92, 115, 196, 183, 133, 147, 135, 146, 142, 156, 154, 152, 157, 148, 138, 133, 158, 207, 198, 196, 207, 174, 181, 147, 189, 228, 234, 198, 197, 212, 218, 230, 222, 127, 200, 249, 231, 216, 204, 196, 195, 199, 218, 228, 222, 225, 231, 224, 213, 209, 204, 200, 201, 195, 179, 154, 146, 164, 150, 84, 154, 198, 171, 160, 166, 170, 176, 177, 175, 174, 173, 174, 176, 179, 184, 186, 183, 183, 177, 181, 185, 186, 172, 187, 146, 81, 139, 151, 157, 155, 148, 147, 124, 142, 145, 137, 155, 166, 176, 179, 187, 187, 188, 189, 188, 183, 166, 139, 129, 142, 162, 166, 166, 161, 151, 143, 125, 134, 158, 176, 187, 161, 165, 159, 149, 138, 122, 108, 111, 97, 97, 77, 55, 61, 59, 47, 58, 59, 61, 75, 91, 97, 103, 112, 115, 115, 120, 119, 122, 112, 114, 120, 88, 42, 38, 37, 49, 50, 60, 68, 68, 69, 76, 33, 31, 29, 30, 31, 32, 32, 33, 32, 29, 28, 80, 104, 74, 141, 158, 153, 135, 133, 138, 128, 135, 123, 103, 74, 48, 45, 52, 50, 58, 62, 70, 62, 77, 101, 58, 70, 50, 65, 74, 67, 89, 150, 156, 145, 144, 156, 159, 166, 171, 179, 175, 173, 173, 167, 173, 171, 183, 194, 195, 186, 182, 207, 215, 222, 245, 239, 210, 198, 223, 203, 202, 199, 197, 197, 196, 193, 189, 195, 200, 199, 194, 192, 192, 188, 203, 181, 181, 196, 199, 182, 216, 210, 46, 177, 198, 127, 81, 78, 75, 101, 92, 89, 83, 91, 112, 142, 181, 200, 196, 218, 216, 151, 98, 156, 193, 207, 222, 198, 198, 223, 221, 205, 210, 221, 178, 64, 203, 241, 213, 217, 210, 209, 209, 198, 202, 213, 214, 215, 209, 190, 196, 208, 208, 205, 201, 190, 178, 163, 151, 157, 162, 106, 130, 216, 197, 172, 181, 179, 174, 178, 178, 179, 178, 176, 176, 179, 184, 190, 182, 178, 176, 174, 173, 183, 171, 177, 141, 108, 137, 159, 166, 154, 146, 145, 123, 136, 141, 127, 143, 155, 177, 175, 191, 189, 189, 194, 191, 183, 167, 144, 141, 163, 181, 168, 159, 162, 149, 133, 120, 139, 165, 174, 167, 168, 166, 159, 148, 136, 119, 103, 111, 101, 95, 72, 55, 63, 56, 40, 53, 51, 52, 73, 97, 106, 106, 111, 113, 114, 118, 113, 115, 115, 116, 109, 69, 30, 36, 39, 54, 50, 54, 57, 55, 54, 60, 36, 32, 31, 32, 32, 32, 31, 27, 26, 30, 36, 94, 82, 38, 176, 127, 133, 137, 141, 131, 117, 120, 109, 94, 76, 55, 45, 39, 46, 61, 63, 65, 57, 76, 101, 60, 70, 49, 67, 81, 73, 93, 165, 174, 159, 159, 175, 182, 193, 187, 180, 165, 164, 173, 152, 163, 173, 160, 182, 179, 182, 175, 187, 185, 213, 229, 214, 197, 190, 217, 218, 210, 197, 204, 202, 199, 196, 196, 198, 200, 201, 198, 190, 183, 199, 177, 207, 194, 197, 184, 193, 173, 224, 89, 120, 225, 233, 231, 155, 114, 112, 111, 143, 175, 208, 226, 222, 219, 203, 232, 202, 113, 120, 230, 229, 198, 203, 214, 219, 229, 207, 200, 222, 212, 223, 182, 79, 221, 207, 195, 215, 202, 212, 221, 210, 209, 212, 211, 219, 226, 213, 201, 204, 195, 203, 227, 184, 143, 186, 183, 131, 181, 162, 82, 141, 190, 206, 188, 178, 192, 194, 192, 193, 192, 187, 183, 184, 188, 192, 181, 177, 178, 174, 171, 189, 177, 173, 140, 129, 134, 160, 167, 153, 147, 150, 131, 140, 144, 122, 135, 148, 176, 171, 189, 186, 185, 190, 188, 183, 175, 158, 149, 162, 170, 151, 148, 171, 160, 132, 117, 138, 167, 177, 159, 175, 159, 148, 132, 123, 111, 98, 110, 102, 97, 68, 52, 63, 57, 43, 59, 57, 62, 88, 116, 124, 117, 114, 114, 112, 122, 128, 128, 117, 120, 121, 74, 28, 38, 39, 51, 49, 57, 61, 57, 55, 58, 29, 29, 32, 36, 40, 36, 30, 29, 26, 23, 41, 90, 73, 52, 168, 134, 132, 135, 129, 117, 120, 119, 107, 89, 67, 49, 47, 56, 57, 56, 65, 67, 68, 73, 108, 65, 66, 55, 67, 71, 70, 94, 193, 173, 181, 173, 173, 172, 170, 166, 166, 166, 166, 165, 166, 165, 172, 175, 180, 187, 190, 187, 182, 189, 187, 192, 197, 192, 191, 201, 205, 200, 200, 205, 202, 196, 194, 194, 194, 194, 193, 188, 185, 185, 184, 185, 196, 194, 189, 202, 210, 192, 208, 164, 98, 185, 224, 206, 220, 210, 217, 233, 231, 222, 217, 214, 208, 218, 224, 214, 158, 138, 208, 225, 200, 213, 205, 211, 213, 216, 218, 217, 206, 217, 224, 165, 122, 235, 204, 212, 202, 217, 210, 211, 211, 210, 208, 208, 208, 209, 209, 213, 211, 210, 210, 208, 159, 148, 148, 181, 160, 174, 215, 143, 55, 121, 197, 183, 175, 190, 195, 187, 199, 207, 183, 184, 180, 172, 178, 190, 177, 178, 172, 177, 169, 173, 143, 117, 136, 155, 154, 154, 150, 146, 131, 127, 132, 140, 122, 138, 155, 175, 161, 178, 183, 185, 180, 177, 175, 172, 177, 180, 176, 158, 143, 151, 171, 153, 125, 130, 147, 141, 131, 133, 129, 119, 115, 116, 111, 105, 110, 111, 105, 103, 57, 54, 64, 45, 54, 57, 48, 67, 95, 110, 119, 118, 117, 124, 122, 119, 115, 115, 113, 119, 116, 69, 37, 42, 48, 53, 47, 51, 70, 76, 70, 69, 28, 30, 32, 34, 35, 34, 34, 28, 22, 24, 55, 86, 58, 92, 175, 139, 132, 124, 121, 115, 114, 113, 100, 85, 69, 55, 51, 55, 48, 49, 62, 64, 63, 66, 104, 67, 64, 51, 64, 73, 71, 92, 188, 168, 177, 168, 170, 169, 168, 168, 168, 170, 171, 173, 174, 175, 179, 181, 184, 188, 191, 191, 188, 193, 191, 194, 194, 188, 186, 193, 200, 195, 194, 198, 198, 197, 198, 198, 206, 201, 188, 189, 197, 197, 195, 200, 186, 189, 194, 175, 174, 159, 161, 172, 113, 120, 208, 210, 213, 228, 201, 192, 216, 215, 203, 199, 218, 209, 214, 204, 195, 227, 210, 198, 222, 197, 210, 214, 216, 213, 207, 206, 202, 206, 209, 192, 183, 227, 208, 217, 206, 205, 207, 209, 209, 211, 210, 211, 211, 211, 202, 206, 210, 217, 218, 211, 158, 140, 155, 168, 164, 172, 162, 179, 187, 78, 65, 158, 181, 193, 188, 184, 190, 188, 184, 191, 186, 185, 191, 188, 175, 178, 175, 179, 156, 162, 145, 132, 158, 171, 156, 144, 135, 133, 121, 121, 127, 138, 124, 138, 153, 170, 158, 173, 177, 178, 178, 176, 172, 174, 183, 186, 174, 158, 151, 154, 158, 142, 124, 131, 140, 134, 123, 119, 113, 105, 105, 110, 112, 113, 113, 105, 105, 107, 62, 54, 57, 46, 58, 55, 50, 81, 108, 114, 123, 124, 123, 127, 121, 117, 118, 117, 112, 117, 114, 66, 35, 42, 47, 53, 47, 50, 68, 74, 69, 70, 29, 30, 33, 32, 30, 32, 39, 31, 17, 25, 67, 72, 27, 111, 174, 141, 136, 125, 127, 127, 121, 120, 106, 90, 76, 61, 51, 48, 42, 44, 60, 63, 59, 62, 102, 71, 63, 46, 62, 74, 72, 91, 190, 169, 178, 171, 173, 173, 172, 173, 173, 173, 175, 176, 178, 180, 181, 182, 184, 187, 190, 193, 194, 196, 194, 195, 194, 189, 187, 192, 198, 196, 196, 196, 197, 197, 198, 203, 190, 186, 194, 188, 173, 166, 185, 198, 194, 181, 165, 166, 196, 185, 172, 164, 142, 128, 150, 153, 162, 156, 186, 203, 198, 215, 226, 213, 208, 190, 226, 222, 208, 226, 208, 196, 219, 204, 212, 206, 205, 216, 218, 217, 208, 209, 204, 202, 203, 193, 202, 211, 210, 207, 206, 206, 209, 211, 212, 212, 212, 212, 206, 205, 203, 213, 211, 193, 127, 139, 159, 150, 140, 147, 160, 137, 186, 189, 87, 48, 139, 189, 167, 182, 199, 163, 206, 185, 187, 183, 185, 188, 190, 183, 170, 170, 156, 130, 138, 164, 173, 162, 145, 132, 128, 129, 119, 121, 123, 130, 118, 136, 148, 166, 157, 171, 172, 174, 168, 163, 161, 163, 172, 174, 165, 153, 146, 141, 134, 127, 125, 127, 129, 124, 115, 109, 109, 115, 129, 141, 140, 136, 129, 125, 134, 122, 73, 62, 58, 52, 62, 53, 52, 95, 120, 117, 124, 128, 127, 128, 120, 118, 121, 120, 113, 119, 114, 62, 33, 43, 47, 50, 46, 49, 64, 68, 66, 69, 30, 29, 33, 33, 28, 30, 40, 34, 24, 42, 79, 63, 18, 123, 172, 140, 138, 131, 132, 130, 124, 120, 105, 91, 78, 62, 50, 45, 41, 41, 58, 63, 59, 62, 105, 76, 66, 46, 61, 73, 71, 91, 194, 173, 181, 173, 177, 179, 180, 178, 176, 175, 174, 174, 176, 177, 177, 179, 181, 184, 188, 193, 197, 194, 194, 194, 194, 194, 194, 195, 199, 202, 202, 199, 198, 197, 195, 201, 199, 196, 194, 194, 195, 195, 180, 148, 139, 135, 147, 194, 227, 239, 239, 240, 219, 195, 174, 163, 165, 146, 124, 117, 124, 144, 170, 201, 214, 213, 217, 213, 214, 212, 226, 224, 207, 227, 217, 207, 209, 207, 212, 209, 199, 208, 212, 212, 221, 207, 214, 206, 208, 212, 208, 209, 211, 212, 212, 212, 211, 210, 205, 208, 209, 212, 206, 204, 169, 164, 142, 151, 146, 143, 133, 158, 150, 189, 227, 150, 96, 151, 188, 168, 189, 215, 168, 188, 188, 184, 182, 181, 187, 183, 174, 149, 134, 127, 152, 173, 156, 144, 142, 130, 122, 124, 118, 121, 120, 124, 116, 136, 149, 166, 159, 173, 171, 173, 168, 165, 164, 164, 167, 171, 168, 156, 144, 133, 125, 124, 123, 116, 113, 115, 122, 132, 143, 155, 166, 172, 162, 150, 142, 146, 160, 122, 65, 61, 56, 50, 59, 51, 58, 104, 125, 116, 124, 128, 126, 127, 121, 121, 123, 120, 115, 121, 113, 58, 31, 44, 46, 49, 46, 49, 60, 63, 63, 69, 31, 28, 32, 35, 30, 29, 38, 31, 36, 64, 79, 46, 23, 133, 173, 139, 134, 134, 131, 124, 128, 115, 103, 91, 78, 62, 51, 49, 46, 38, 54, 63, 61, 63, 107, 79, 70, 50, 61, 70, 70, 91, 191, 170, 179, 171, 176, 179, 180, 180, 177, 175, 173, 173, 174, 176, 177, 180, 182, 183, 185, 189, 194, 192, 192, 193, 194, 195, 197, 196, 200, 206, 204, 197, 196, 197, 196, 190, 196, 197, 196, 198, 189, 165, 153, 176, 213, 232, 239, 244, 234, 221, 185, 168, 183, 213, 217, 195, 207, 238, 228, 212, 204, 168, 139, 134, 132, 141, 139, 149, 152, 132, 127, 130, 134, 171, 182, 194, 209, 216, 219, 220, 218, 222, 224, 222, 211, 218, 217, 215, 212, 215, 213, 209, 210, 210, 210, 212, 213, 214, 213, 211, 207, 215, 212, 205, 162, 139, 131, 158, 190, 175, 177, 127, 140, 171, 180, 192, 155, 96, 160, 192, 152, 191, 175, 190, 191, 188, 180, 180, 180, 175, 176, 132, 133, 154, 163, 156, 136, 134, 139, 131, 122, 124, 120, 126, 124, 126, 121, 142, 153, 169, 162, 173, 167, 168, 170, 168, 163, 159, 157, 154, 145, 133, 126, 126, 128, 128, 126, 121, 133, 146, 153, 162, 169, 171, 167, 159, 151, 154, 151, 151, 164, 110, 50, 59, 55, 45, 53, 51, 65, 108, 124, 115, 124, 129, 124, 128, 124, 121, 119, 113, 113, 122, 109, 52, 29, 45, 46, 48, 45, 49, 57, 59, 61, 69, 33, 29, 32, 36, 28, 28, 33, 24, 42, 77, 67, 25, 18, 133, 174, 138, 133, 135, 133, 127, 133, 118, 107, 94, 79, 63, 53, 52, 47, 36, 51, 63, 62, 63, 103, 86, 71, 51, 61, 69, 67, 90, 193, 165, 171, 167, 173, 174, 174, 177, 175, 173, 172, 173, 175, 176, 179, 182, 183, 183, 183, 187, 191, 192, 193, 192, 192, 195, 198, 196, 199, 208, 204, 195, 195, 198, 201, 198, 174, 167, 147, 137, 148, 172, 205, 232, 223, 218, 225, 213, 205, 202, 207, 193, 213, 222, 206, 221, 209, 194, 204, 206, 204, 232, 242, 239, 216, 220, 224, 223, 224, 234, 241, 219, 199, 157, 137, 122, 116, 129, 119, 108, 112, 111, 118, 129, 143, 168, 183, 214, 218, 213, 204, 206, 205, 213, 217, 216, 211, 212, 208, 214, 215, 218, 210, 217, 204, 220, 222, 211, 183, 176, 137, 146, 158, 141, 119, 154, 201, 184, 104, 129, 189, 158, 182, 178, 187, 195, 184, 183, 192, 169, 159, 126, 154, 162, 150, 142, 136, 129, 127, 131, 131, 133, 127, 130, 133, 133, 129, 148, 157, 170, 164, 172, 166, 162, 153, 147, 148, 152, 159, 157, 146, 133, 132, 143, 153, 155, 156, 163, 170, 170, 168, 171, 174, 176, 172, 165, 168, 176, 173, 160, 163, 94, 49, 61, 58, 50, 52, 50, 70, 109, 123, 117, 124, 126, 123, 129, 126, 122, 116, 107, 112, 123, 107, 50, 31, 42, 44, 46, 45, 50, 57, 58, 60, 68, 35, 36, 34, 38, 24, 29, 27, 23, 50, 85, 57, 22, 18, 142, 167, 136, 137, 131, 133, 129, 124, 117, 105, 89, 76, 67, 59, 53, 48, 36, 54, 66, 65, 64, 90, 104, 65, 46, 62, 73, 65, 82, 211, 165, 166, 171, 177, 172, 170, 175, 173, 172, 174, 175, 176, 175, 179, 181, 183, 182, 183, 189, 194, 197, 197, 193, 190, 194, 196, 192, 193, 206, 197, 188, 194, 205, 221, 194, 125, 147, 179, 222, 233, 226, 229, 236, 219, 210, 211, 202, 201, 198, 209, 210, 206, 200, 195, 204, 219, 216, 213, 202, 156, 151, 142, 156, 184, 215, 215, 207, 214, 212, 214, 217, 224, 220, 213, 202, 184, 190, 204, 201, 215, 227, 209, 190, 161, 133, 127, 126, 132, 124, 110, 103, 104, 176, 209, 215, 206, 212, 207, 213, 209, 221, 212, 214, 210, 197, 210, 195, 149, 156, 153, 161, 160, 154, 164, 146, 135, 215, 207, 187, 158, 181, 173, 177, 189, 193, 183, 185, 212, 144, 82, 72, 92, 137, 147, 131, 125, 125, 120, 115, 125, 143, 139, 131, 139, 134, 139, 151, 160, 165, 167, 173, 174, 168, 156, 153, 163, 171, 175, 174, 171, 171, 171, 169, 165, 164, 167, 174, 177, 169, 169, 177, 173, 176, 178, 172, 174, 165, 172, 168, 164, 75, 62, 54, 50, 59, 57, 48, 79, 113, 122, 123, 121, 119, 123, 128, 127, 128, 120, 107, 114, 129, 106, 51, 39, 33, 41, 45, 43, 52, 62, 61, 59, 63, 34, 38, 35, 37, 33, 36, 23, 38, 73, 81, 45, 19, 22, 153, 158, 129, 134, 132, 134, 129, 123, 115, 104, 90, 80, 73, 67, 61, 54, 40, 56, 65, 64, 62, 85, 108, 69, 47, 60, 74, 64, 75, 207, 168, 171, 173, 178, 173, 173, 179, 177, 176, 177, 179, 179, 176, 180, 183, 184, 183, 183, 185, 188, 191, 193, 191, 189, 191, 190, 185, 187, 193, 192, 183, 188, 202, 196, 178, 178, 168, 181, 166, 168, 195, 211, 220, 214, 218, 233, 234, 227, 235, 233, 178, 119, 105, 107, 102, 87, 139, 181, 194, 141, 131, 121, 132, 163, 200, 206, 204, 209, 204, 198, 211, 212, 210, 199, 203, 238, 176, 165, 156, 137, 162, 172, 186, 207, 229, 222, 183, 183, 206, 238, 251, 235, 175, 136, 220, 202, 202, 210, 212, 213, 213, 203, 206, 212, 208, 208, 183, 153, 169, 157, 138, 134, 139, 151, 147, 119, 157, 178, 167, 121, 153, 163, 169, 180, 188, 182, 205, 175, 108, 73, 88, 112, 112, 117, 117, 121, 133, 121, 72, 53, 76, 119, 147, 142, 138, 143, 152, 163, 170, 166, 164, 167, 168, 175, 180, 181, 181, 182, 182, 182, 182, 177, 170, 171, 178, 181, 180, 175, 167, 168, 174, 170, 172, 178, 173, 174, 166, 169, 164, 150, 69, 65, 61, 56, 63, 59, 51, 83, 117, 124, 125, 125, 122, 123, 125, 127, 128, 120, 109, 119, 128, 100, 43, 37, 34, 42, 45, 44, 55, 65, 63, 61, 65, 33, 39, 35, 31, 37, 34, 16, 45, 84, 68, 32, 15, 24, 156, 161, 130, 133, 131, 132, 129, 124, 115, 103, 90, 82, 75, 68, 61, 50, 40, 55, 62, 61, 61, 83, 107, 74, 50, 55, 68, 65, 79, 212, 172, 171, 172, 180, 179, 177, 179, 177, 178, 179, 180, 179, 177, 180, 181, 183, 184, 184, 183, 182, 183, 189, 191, 190, 192, 192, 188, 187, 189, 195, 188, 187, 180, 136, 162, 241, 219, 220, 214, 203, 176, 156, 147, 138, 130, 121, 122, 135, 177, 215, 214, 179, 150, 131, 122, 144, 175, 197, 213, 213, 228, 222, 218, 218, 215, 204, 210, 223, 214, 189, 198, 200, 212, 216, 202, 214, 179, 107, 113, 142, 127, 124, 117, 149, 204, 228, 215, 223, 199, 168, 143, 132, 158, 134, 189, 215, 205, 213, 207, 215, 210, 206, 204, 208, 200, 204, 197, 160, 158, 154, 156, 155, 155, 167, 160, 127, 135, 162, 128, 137, 148, 157, 173, 174, 189, 182, 192, 129, 137, 165, 164, 139, 123, 128, 134, 129, 129, 127, 112, 67, 32, 67, 135, 146, 144, 145, 154, 167, 172, 170, 168, 167, 164, 170, 175, 175, 175, 176, 176, 176, 176, 173, 169, 169, 174, 175, 173, 167, 161, 167, 174, 170, 172, 175, 173, 174, 167, 165, 161, 132, 64, 65, 59, 57, 62, 59, 58, 93, 124, 126, 126, 129, 126, 123, 123, 126, 126, 119, 113, 122, 125, 92, 37, 34, 34, 40, 42, 43, 52, 62, 64, 62, 66, 32, 35, 33, 27, 36, 28, 15, 50, 79, 53, 25, 13, 32, 159, 167, 135, 135, 129, 132, 129, 126, 116, 103, 89, 82, 76, 67, 57, 45, 37, 51, 57, 59, 62, 83, 107, 77, 50, 50, 66, 67, 80, 215, 175, 172, 172, 182, 184, 181, 177, 177, 177, 178, 179, 178, 175, 178, 179, 180, 182, 184, 183, 180, 182, 189, 190, 188, 187, 186, 183, 185, 184, 184, 184, 190, 184, 146, 148, 228, 226, 205, 212, 225, 224, 221, 199, 201, 210, 198, 182, 172, 150, 146, 157, 195, 225, 227, 227, 221, 219, 219, 209, 216, 216, 205, 199, 202, 206, 204, 211, 212, 182, 138, 101, 118, 121, 153, 223, 209, 206, 170, 121, 122, 120, 129, 142, 194, 230, 221, 163, 141, 138, 153, 166, 190, 199, 132, 173, 218, 213, 225, 205, 221, 209, 213, 207, 208, 200, 207, 215, 179, 155, 136, 129, 130, 135, 150, 150, 136, 134, 181, 104, 153, 128, 120, 154, 168, 180, 183, 169, 94, 108, 147, 142, 137, 141, 129, 127, 133, 134, 134, 144, 133, 88, 96, 145, 143, 138, 148, 159, 170, 176, 176, 176, 173, 165, 175, 184, 184, 184, 182, 180, 177, 177, 179, 177, 171, 165, 162, 162, 161, 155, 160, 171, 170, 171, 171, 170, 174, 169, 163, 160, 116, 60, 66, 57, 55, 56, 54, 56, 93, 121, 119, 119, 127, 128, 123, 123, 126, 125, 120, 116, 124, 120, 86, 35, 34, 30, 34, 39, 45, 52, 63, 66, 63, 67, 30, 29, 30, 26, 35, 26, 24, 59, 68, 41, 23, 14, 46, 168, 166, 135, 136, 132, 133, 129, 124, 116, 102, 89, 83, 78, 69, 57, 47, 38, 52, 55, 59, 62, 81, 111, 79, 49, 51, 72, 68, 69, 205, 178, 182, 176, 180, 182, 185, 177, 176, 177, 180, 180, 178, 174, 176, 175, 175, 179, 184, 185, 184, 184, 190, 192, 188, 186, 186, 185, 180, 191, 190, 191, 195, 186, 173, 127, 183, 243, 202, 202, 200, 213, 222, 209, 210, 209, 208, 217, 210, 217, 213, 159, 113, 116, 132, 132, 113, 131, 164, 194, 217, 222, 224, 229, 225, 217, 207, 211, 205, 164, 138, 112, 128, 132, 147, 201, 191, 192, 236, 230, 210, 215, 214, 224, 229, 193, 162, 156, 191, 223, 237, 212, 213, 235, 133, 164, 222, 201, 224, 206, 231, 210, 216, 210, 217, 212, 206, 219, 212, 208, 185, 155, 143, 155, 172, 203, 207, 151, 203, 115, 153, 147, 122, 151, 187, 174, 175, 157, 125, 114, 132, 114, 124, 142, 131, 132, 150, 152, 140, 131, 133, 125, 136, 153, 143, 142, 149, 160, 174, 180, 177, 171, 168, 166, 172, 177, 177, 179, 181, 182, 183, 181, 179, 176, 170, 164, 162, 163, 161, 152, 150, 160, 163, 169, 168, 168, 171, 167, 159, 159, 103, 59, 68, 55, 56, 56, 54, 59, 98, 125, 121, 120, 130, 131, 124, 121, 123, 123, 121, 118, 121, 116, 84, 38, 36, 29, 33, 45, 56, 62, 68, 69, 68, 72, 32, 28, 31, 26, 33, 25, 26, 71, 56, 41, 26, 11, 65, 171, 158, 134, 132, 132, 132, 128, 126, 117, 104, 92, 86, 79, 68, 56, 51, 41, 51, 53, 57, 59, 76, 118, 73, 50, 54, 76, 69, 63, 198, 173, 181, 176, 178, 180, 185, 181, 179, 179, 179, 179, 177, 174, 175, 174, 175, 178, 182, 184, 184, 184, 188, 190, 188, 188, 190, 191, 187, 197, 187, 185, 187, 186, 188, 151, 147, 204, 115, 128, 144, 167, 192, 222, 205, 202, 205, 214, 207, 199, 220, 224, 210, 199, 180, 190, 205, 188, 177, 185, 180, 179, 172, 157, 162, 165, 163, 163, 170, 163, 153, 160, 153, 171, 179, 194, 226, 213, 215, 220, 220, 222, 197, 165, 162, 168, 182, 206, 216, 214, 207, 199, 218, 205, 103, 196, 216, 201, 219, 208, 224, 209, 212, 210, 217, 213, 210, 217, 206, 202, 203, 206, 206, 208, 213, 206, 183, 98, 195, 139, 136, 154, 134, 174, 197, 154, 160, 177, 226, 207, 203, 150, 103, 104, 136, 128, 138, 129, 122, 151, 154, 145, 143, 133, 137, 140, 149, 160, 180, 176, 179, 173, 174, 178, 177, 176, 178, 178, 178, 178, 178, 177, 175, 172, 170, 167, 168, 169, 166, 159, 157, 161, 165, 170, 168, 166, 164, 160, 149, 153, 99, 61, 66, 55, 59, 57, 58, 69, 111, 129, 128, 123, 129, 130, 121, 120, 120, 121, 120, 118, 123, 115, 77, 42, 36, 24, 39, 67, 82, 88, 93, 94, 96, 101, 38, 32, 32, 25, 27, 21, 19, 76, 46, 46, 27, 5, 81, 167, 152, 134, 127, 130, 129, 126, 129, 119, 106, 96, 90, 79, 64, 54, 53, 42, 48, 50, 55, 56, 71, 122, 65, 54, 53, 72, 66, 66, 202, 166, 171, 171, 178, 180, 185, 184, 182, 179, 177, 178, 177, 175, 176, 176, 176, 178, 180, 181, 182, 184, 186, 187, 186, 186, 188, 190, 189, 194, 185, 188, 184, 184, 179, 179, 125, 191, 121, 132, 145, 127, 157, 240, 204, 210, 196, 185, 211, 217, 202, 182, 204, 194, 211, 192, 184, 220, 207, 201, 212, 222, 221, 203, 200, 179, 165, 155, 169, 190, 188, 219, 206, 217, 179, 146, 120, 187, 235, 210, 170, 129, 151, 169, 206, 219, 209, 213, 211, 209, 209, 211, 218, 181, 134, 213, 215, 216, 212, 209, 209, 211, 211, 210, 210, 208, 207, 208, 207, 208, 209, 209, 207, 202, 210, 199, 174, 100, 203, 149, 149, 156, 136, 123, 135, 183, 238, 212, 243, 229, 204, 171, 122, 146, 200, 190, 201, 185, 129, 146, 160, 151, 144, 133, 142, 132, 145, 162, 185, 169, 177, 170, 167, 170, 175, 177, 181, 183, 182, 180, 178, 177, 176, 175, 173, 169, 168, 170, 169, 169, 172, 171, 175, 181, 181, 171, 155, 148, 137, 144, 96, 65, 63, 55, 60, 58, 59, 75, 118, 121, 127, 120, 122, 127, 119, 123, 124, 122, 118, 121, 133, 113, 47, 23, 28, 34, 66, 93, 101, 108, 116, 121, 126, 132, 36, 33, 32, 24, 25, 18, 29, 71, 44, 43, 24, 6, 85, 169, 149, 135, 127, 129, 127, 125, 127, 120, 109, 99, 93, 82, 67, 56, 53, 42, 48, 51, 57, 57, 70, 123, 67, 55, 52, 71, 66, 66, 200, 168, 172, 171, 176, 178, 183, 181, 178, 176, 176, 177, 177, 177, 177, 176, 176, 177, 179, 180, 182, 184, 185, 186, 186, 185, 187, 189, 190, 190, 184, 191, 181, 178, 181, 182, 126, 195, 149, 114, 131, 111, 111, 216, 207, 211, 223, 219, 213, 181, 227, 158, 208, 217, 203, 197, 219, 191, 194, 223, 205, 198, 208, 199, 210, 215, 221, 218, 221, 209, 213, 212, 183, 200, 210, 201, 178, 119, 132, 123, 120, 174, 192, 209, 222, 209, 211, 206, 203, 202, 209, 206, 224, 150, 181, 219, 208, 213, 218, 211, 208, 214, 215, 211, 211, 210, 209, 208, 207, 207, 207, 207, 206, 209, 197, 203, 170, 112, 216, 149, 181, 126, 133, 136, 198, 242, 224, 212, 167, 161, 176, 156, 163, 223, 195, 216, 206, 207, 162, 133, 147, 146, 141, 133, 140, 132, 145, 164, 180, 172, 178, 171, 166, 166, 173, 177, 179, 183, 183, 181, 179, 177, 176, 175, 172, 168, 168, 170, 169, 169, 171, 171, 176, 184, 187, 178, 162, 154, 142, 144, 86, 65, 60, 55, 57, 60, 59, 81, 125, 123, 129, 124, 124, 129, 124, 129, 128, 128, 126, 129, 128, 96, 35, 22, 38, 53, 79, 89, 82, 81, 84, 85, 92, 102, 32, 33, 31, 25, 25, 23, 53, 67, 45, 44, 23, 8, 89, 169, 146, 136, 129, 128, 126, 124, 125, 119, 110, 103, 96, 83, 68, 60, 54, 42, 48, 52, 58, 56, 67, 123, 71, 58, 52, 72, 68, 69, 198, 165, 171, 168, 171, 174, 179, 179, 176, 174, 175, 177, 178, 178, 177, 176, 176, 177, 178, 179, 180, 182, 184, 185, 185, 185, 186, 189, 188, 187, 182, 192, 179, 174, 182, 185, 133, 195, 198, 162, 138, 117, 147, 227, 207, 208, 191, 112, 158, 197, 127, 49, 145, 197, 204, 140, 204, 217, 213, 205, 209, 197, 213, 212, 195, 217, 207, 203, 210, 203, 221, 149, 173, 146, 169, 203, 222, 207, 209, 213, 166, 168, 208, 200, 159, 151, 188, 221, 212, 205, 207, 202, 227, 138, 205, 219, 203, 208, 218, 210, 207, 214, 214, 209, 210, 210, 210, 209, 208, 207, 206, 206, 208, 210, 206, 208, 166, 116, 236, 141, 197, 165, 148, 137, 212, 233, 226, 218, 57, 24, 84, 195, 231, 163, 55, 171, 217, 196, 183, 125, 142, 146, 136, 131, 131, 131, 149, 176, 178, 170, 170, 174, 174, 172, 175, 176, 178, 180, 182, 181, 179, 176, 175, 173, 170, 168, 167, 169, 168, 169, 172, 171, 174, 179, 178, 177, 171, 167, 159, 155, 80, 70, 59, 56, 53, 63, 57, 88, 132, 124, 130, 129, 129, 133, 129, 134, 130, 129, 130, 128, 113, 86, 62, 57, 53, 50, 68, 89, 89, 82, 65, 55, 67, 84, 30, 33, 29, 26, 27, 31, 81, 58, 43, 45, 23, 11, 92, 167, 145, 139, 132, 128, 127, 125, 125, 118, 111, 105, 98, 84, 69, 61, 56, 42, 48, 51, 57, 53, 61, 121, 72, 59, 50, 72, 71, 72, 193, 163, 170, 168, 170, 171, 177, 179, 177, 175, 175, 178, 179, 178, 178, 178, 176, 177, 177, 178, 179, 181, 183, 184, 184, 184, 186, 188, 185, 187, 181, 187, 179, 176, 179, 178, 141, 182, 220, 218, 189, 190, 200, 204, 214, 212, 188, 101, 70, 106, 169, 184, 165, 104, 76, 57, 219, 187, 209, 188, 186, 221, 199, 152, 129, 223, 228, 216, 202, 206, 227, 100, 151, 114, 143, 183, 213, 198, 183, 206, 163, 148, 213, 166, 104, 109, 145, 227, 209, 210, 211, 204, 221, 163, 189, 219, 218, 218, 211, 210, 210, 210, 209, 209, 209, 210, 211, 210, 209, 208, 208, 208, 212, 210, 218, 211, 162, 126, 232, 147, 192, 192, 150, 153, 222, 232, 234, 209, 39, 94, 166, 183, 213, 161, 31, 149, 239, 195, 180, 127, 151, 151, 136, 132, 124, 130, 152, 177, 162, 157, 153, 165, 173, 175, 175, 175, 174, 176, 180, 180, 177, 174, 173, 172, 170, 167, 167, 168, 166, 167, 172, 173, 175, 179, 177, 172, 167, 170, 168, 164, 74, 77, 59, 59, 49, 65, 54, 92, 135, 123, 131, 132, 129, 132, 129, 134, 134, 129, 125, 127, 115, 92, 79, 67, 55, 55, 70, 88, 93, 91, 73, 58, 67, 83, 31, 35, 27, 24, 25, 32, 98, 43, 35, 41, 21, 14, 97, 168, 145, 141, 135, 129, 127, 126, 125, 116, 110, 106, 98, 84, 69, 62, 58, 42, 46, 50, 54, 49, 54, 115, 69, 56, 46, 69, 71, 73, 192, 164, 173, 170, 172, 173, 180, 180, 178, 176, 177, 179, 180, 179, 178, 178, 176, 176, 176, 177, 178, 180, 182, 184, 183, 183, 185, 188, 184, 188, 180, 184, 181, 181, 175, 169, 154, 177, 204, 206, 213, 224, 222, 188, 199, 183, 169, 181, 203, 225, 215, 225, 218, 216, 219, 170, 182, 195, 205, 137, 111, 197, 210, 142, 102, 199, 183, 151, 140, 196, 194, 127, 140, 119, 109, 136, 213, 213, 211, 218, 170, 163, 186, 121, 126, 142, 126, 235, 201, 207, 199, 199, 205, 195, 141, 206, 221, 213, 201, 211, 215, 207, 206, 212, 211, 210, 211, 211, 210, 211, 211, 211, 210, 219, 213, 204, 154, 147, 193, 139, 181, 203, 167, 158, 179, 214, 214, 204, 201, 196, 159, 177, 231, 163, 83, 172, 219, 208, 170, 124, 144, 141, 129, 132, 123, 132, 155, 182, 163, 167, 152, 156, 162, 170, 173, 172, 169, 172, 178, 178, 175, 173, 173, 172, 170, 167, 166, 169, 168, 170, 172, 171, 173, 177, 177, 174, 169, 171, 169, 161, 63, 77, 58, 61, 47, 66, 52, 93, 136, 119, 128, 130, 126, 127, 124, 128, 130, 129, 128, 128, 107, 79, 77, 78, 67, 62, 69, 82, 85, 81, 74, 67, 63, 66, 32, 32, 25, 22, 26, 44, 90, 42, 28, 33, 17, 11, 110, 168, 153, 138, 132, 128, 130, 124, 124, 118, 109, 101, 94, 85, 74, 66, 58, 42, 49, 54, 50, 56, 47, 108, 78, 57, 53, 68, 69, 59, 185, 171, 169, 169, 173, 177, 181, 181, 180, 180, 180, 180, 179, 178, 176, 176, 176, 177, 176, 176, 176, 180, 182, 184, 185, 186, 187, 187, 187, 186, 183, 187, 184, 183, 185, 177, 157, 176, 201, 208, 199, 202, 214, 212, 182, 171, 199, 207, 210, 194, 215, 197, 231, 209, 202, 212, 209, 180, 151, 147, 128, 175, 200, 180, 197, 211, 165, 93, 106, 215, 213, 179, 158, 126, 107, 130, 197, 216, 213, 201, 168, 152, 185, 129, 115, 112, 128, 211, 204, 203, 208, 201, 193, 222, 113, 177, 217, 201, 206, 202, 205, 210, 211, 212, 210, 208, 211, 204, 209, 213, 204, 213, 205, 223, 200, 203, 155, 182, 152, 125, 155, 164, 169, 161, 156, 203, 204, 193, 205, 194, 142, 168, 201, 206, 196, 228, 209, 211, 148, 131, 145, 146, 131, 137, 119, 142, 163, 175, 174, 176, 164, 164, 167, 171, 174, 174, 173, 174, 175, 174, 171, 169, 169, 170, 171, 170, 170, 172, 172, 173, 174, 171, 173, 177, 175, 170, 169, 171, 176, 146, 72, 82, 53, 66, 51, 58, 44, 102, 133, 118, 127, 129, 119, 127, 127, 124, 127, 131, 131, 120, 95, 78, 79, 88, 86, 69, 55, 69, 89, 87, 76, 69, 61, 59, 36, 32, 27, 23, 30, 55, 83, 48, 28, 32, 19, 12, 119, 165, 153, 136, 133, 128, 130, 122, 124, 119, 109, 99, 92, 86, 76, 68, 59, 43, 49, 54, 49, 61, 48, 104, 86, 57, 58, 71, 73, 57, 186, 180, 169, 169, 174, 179, 179, 181, 180, 181, 182, 182, 181, 179, 177, 178, 177, 178, 177, 176, 175, 179, 181, 183, 186, 187, 187, 186, 185, 185, 187, 189, 186, 184, 186, 188, 163, 160, 177, 216, 213, 192, 199, 224, 163, 224, 208, 199, 209, 237, 247, 221, 199, 224, 244, 200, 229, 172, 64, 156, 234, 224, 211, 203, 185, 207, 240, 188, 115, 135, 204, 193, 195, 204, 195, 218, 215, 183, 195, 199, 194, 183, 190, 109, 117, 127, 135, 227, 211, 205, 209, 210, 220, 212, 94, 166, 229, 206, 200, 217, 213, 207, 203, 210, 208, 207, 209, 207, 207, 210, 209, 206, 212, 210, 190, 219, 143, 206, 116, 114, 134, 155, 147, 136, 130, 179, 207, 193, 154, 106, 63, 152, 214, 211, 196, 192, 192, 200, 150, 138, 147, 147, 136, 128, 120, 153, 173, 175, 180, 178, 170, 170, 175, 176, 174, 174, 175, 174, 173, 170, 168, 166, 165, 164, 167, 171, 172, 170, 171, 174, 174, 172, 174, 176, 172, 168, 171, 173, 172, 109, 48, 56, 47, 74, 63, 74, 70, 102, 120, 119, 125, 127, 121, 126, 128, 124, 129, 136, 129, 109, 90, 81, 80, 90, 96, 78, 58, 65, 84, 86, 80, 73, 62, 55, 37, 34, 29, 25, 36, 60, 74, 49, 30, 32, 23, 19, 121, 160, 145, 135, 136, 129, 128, 122, 124, 120, 111, 101, 94, 87, 77, 68, 62, 47, 47, 50, 51, 60, 52, 98, 93, 55, 60, 75, 78, 62, 190, 184, 173, 171, 175, 178, 178, 179, 180, 181, 182, 182, 183, 183, 181, 180, 180, 179, 178, 176, 175, 176, 180, 182, 183, 185, 185, 184, 179, 186, 188, 184, 184, 184, 179, 187, 182, 155, 139, 187, 219, 193, 217, 198, 151, 224, 196, 196, 216, 145, 111, 136, 92, 116, 147, 202, 182, 138, 188, 208, 215, 207, 201, 218, 219, 201, 204, 212, 194, 172, 166, 196, 202, 210, 205, 208, 202, 187, 230, 198, 180, 156, 183, 127, 127, 128, 91, 221, 210, 210, 171, 171, 230, 174, 103, 156, 195, 195, 192, 225, 198, 208, 206, 207, 208, 208, 206, 216, 207, 204, 216, 202, 213, 199, 204, 204, 139, 183, 90, 135, 128, 139, 140, 148, 124, 131, 151, 139, 107, 112, 119, 172, 192, 198, 208, 195, 181, 137, 109, 119, 143, 138, 140, 114, 131, 162, 180, 182, 183, 179, 172, 172, 179, 182, 177, 173, 174, 174, 172, 169, 167, 166, 164, 162, 165, 169, 172, 171, 171, 172, 172, 170, 172, 173, 170, 164, 163, 171, 178, 113, 67, 73, 80, 100, 87, 112, 135, 121, 123, 127, 124, 127, 132, 124, 126, 126, 130, 136, 125, 103, 87, 85, 89, 94, 93, 83, 76, 75, 79, 82, 85, 82, 69, 57, 35, 32, 26, 21, 39, 62, 58, 42, 28, 30, 24, 24, 125, 159, 139, 135, 138, 129, 128, 122, 125, 121, 113, 103, 96, 89, 78, 68, 63, 51, 45, 45, 54, 56, 54, 86, 100, 52, 58, 72, 75, 59, 187, 181, 172, 172, 176, 179, 178, 179, 179, 179, 180, 182, 183, 184, 183, 182, 182, 181, 179, 177, 176, 176, 178, 181, 182, 183, 183, 182, 179, 187, 186, 180, 181, 184, 180, 177, 192, 174, 139, 151, 197, 204, 235, 105, 196, 196, 201, 207, 187, 127, 160, 54, 58, 94, 163, 134, 158, 177, 211, 215, 201, 177, 159, 94, 106, 154, 209, 207, 217, 193, 167, 165, 190, 195, 215, 169, 124, 126, 207, 198, 214, 177, 184, 160, 103, 108, 137, 224, 209, 194, 133, 130, 223, 155, 132, 150, 148, 160, 174, 209, 188, 206, 211, 205, 208, 209, 205, 211, 209, 203, 207, 212, 195, 208, 232, 145, 158, 116, 97, 135, 137, 137, 137, 137, 113, 114, 121, 123, 123, 143, 128, 123, 137, 173, 152, 111, 105, 129, 137, 141, 139, 133, 140, 112, 144, 169, 179, 183, 183, 179, 171, 171, 178, 183, 177, 174, 174, 174, 172, 170, 168, 164, 165, 167, 163, 159, 160, 167, 170, 171, 172, 170, 170, 172, 168, 165, 161, 168, 175, 96, 68, 81, 117, 119, 62, 67, 115, 117, 124, 131, 126, 129, 138, 126, 128, 130, 131, 132, 117, 95, 82, 87, 95, 96, 92, 93, 95, 89, 81, 80, 86, 86, 79, 73, 34, 31, 25, 20, 43, 65, 44, 38, 29, 30, 24, 26, 127, 161, 137, 134, 137, 127, 129, 124, 124, 123, 115, 105, 99, 91, 79, 68, 64, 54, 43, 40, 55, 51, 52, 67, 105, 50, 56, 66, 70, 57, 182, 177, 170, 171, 177, 180, 179, 179, 178, 177, 178, 179, 181, 182, 182, 182, 181, 180, 179, 177, 177, 176, 179, 180, 182, 183, 182, 181, 181, 185, 184, 182, 182, 184, 185, 179, 184, 185, 169, 151, 182, 204, 209, 59, 238, 212, 208, 205, 154, 132, 201, 46, 40, 59, 177, 101, 188, 232, 206, 206, 192, 113, 149, 194, 188, 97, 128, 203, 175, 209, 214, 106, 193, 192, 194, 213, 226, 205, 225, 196, 207, 181, 184, 202, 133, 121, 179, 203, 204, 202, 168, 156, 237, 157, 137, 154, 148, 139, 133, 185, 223, 197, 199, 204, 206, 207, 207, 204, 209, 206, 200, 215, 191, 217, 212, 113, 166, 77, 125, 126, 136, 137, 143, 140, 108, 94, 102, 92, 88, 123, 134, 120, 108, 97, 93, 124, 124, 140, 131, 139, 131, 134, 132, 121, 151, 171, 177, 183, 183, 177, 168, 167, 174, 178, 175, 173, 173, 173, 171, 169, 167, 162, 164, 166, 157, 144, 143, 153, 168, 174, 173, 170, 172, 173, 168, 163, 160, 174, 170, 63, 57, 96, 195, 190, 70, 42, 79, 113, 135, 134, 129, 132, 134, 130, 132, 131, 131, 129, 112, 87, 76, 79, 86, 94, 101, 105, 106, 100, 91, 88, 90, 91, 92, 93, 37, 34, 28, 23, 50, 72, 39, 41, 34, 33, 25, 27, 127, 164, 137, 134, 134, 125, 130, 126, 124, 124, 116, 107, 100, 92, 79, 68, 63, 56, 43, 39, 57, 45, 47, 51, 108, 51, 57, 64, 69, 59, 182, 177, 171, 172, 178, 180, 178, 179, 178, 176, 176, 176, 178, 180, 180, 180, 180, 180, 179, 178, 178, 177, 180, 181, 183, 183, 182, 181, 181, 180, 185, 190, 187, 184, 188, 185, 174, 178, 177, 148, 176, 210, 221, 91, 185, 218, 197, 201, 188, 109, 170, 68, 35, 89, 155, 117, 202, 201, 208, 211, 132, 145, 130, 62, 72, 139, 160, 164, 210, 187, 228, 87, 177, 213, 210, 212, 224, 209, 198, 208, 209, 195, 192, 216, 221, 204, 209, 209, 202, 204, 211, 190, 223, 148, 137, 152, 146, 146, 124, 143, 230, 196, 203, 204, 206, 207, 209, 207, 205, 209, 206, 201, 217, 208, 140, 149, 147, 100, 143, 130, 123, 138, 141, 148, 122, 118, 124, 115, 110, 105, 113, 132, 132, 124, 128, 154, 144, 137, 125, 132, 128, 141, 120, 130, 150, 170, 176, 183, 185, 177, 166, 165, 172, 176, 172, 169, 169, 169, 167, 165, 163, 160, 162, 164, 158, 151, 154, 165, 173, 177, 176, 173, 174, 175, 170, 168, 161, 174, 174, 62, 59, 82, 179, 167, 57, 70, 89, 120, 132, 126, 131, 132, 123, 132, 134, 129, 130, 126, 109, 87, 78, 81, 86, 92, 99, 101, 99, 98, 103, 103, 99, 98, 100, 100, 29, 33, 29, 25, 48, 64, 41, 40, 39, 28, 18, 22, 121, 169, 133, 135, 132, 126, 128, 129, 126, 123, 117, 108, 100, 90, 77, 66, 70, 58, 44, 43, 57, 55, 51, 34, 105, 58, 46, 71, 63, 67, 200, 174, 175, 170, 176, 180, 182, 182, 181, 180, 179, 177, 176, 176, 178, 177, 177, 179, 181, 180, 178, 175, 177, 179, 181, 182, 180, 179, 180, 181, 183, 184, 183, 181, 179, 174, 179, 175, 172, 145, 175, 206, 208, 160, 152, 221, 196, 205, 205, 149, 128, 95, 110, 131, 131, 108, 204, 213, 198, 204, 128, 151, 122, 31, 40, 88, 179, 160, 210, 198, 198, 107, 94, 123, 141, 143, 158, 187, 175, 217, 178, 188, 184, 195, 205, 195, 211, 205, 206, 210, 202, 191, 198, 166, 119, 140, 134, 149, 140, 123, 217, 193, 202, 200, 202, 201, 200, 196, 212, 203, 206, 213, 209, 165, 95, 189, 105, 134, 146, 124, 125, 136, 138, 134, 119, 120, 127, 123, 120, 117, 117, 121, 124, 131, 132, 134, 133, 129, 127, 133, 139, 135, 130, 146, 161, 170, 179, 182, 181, 178, 173, 169, 166, 163, 167, 168, 167, 170, 172, 169, 163, 158, 156, 156, 159, 163, 166, 169, 167, 166, 165, 163, 166, 171, 172, 174, 156, 193, 139, 60, 56, 49, 38, 71, 111, 55, 85, 122, 131, 123, 128, 127, 127, 127, 129, 124, 119, 128, 86, 69, 79, 90, 95, 98, 93, 87, 87, 99, 99, 91, 93, 97, 98, 103, 28, 32, 29, 28, 48, 62, 40, 39, 39, 30, 21, 21, 119, 172, 135, 137, 133, 128, 129, 129, 126, 123, 117, 108, 99, 90, 77, 66, 72, 55, 45, 45, 46, 42, 53, 29, 84, 53, 50, 67, 68, 65, 193, 166, 172, 170, 178, 180, 181, 182, 181, 180, 180, 179, 177, 177, 178, 177, 177, 178, 179, 179, 176, 176, 178, 180, 182, 182, 181, 179, 179, 181, 182, 183, 183, 181, 180, 179, 179, 179, 171, 151, 167, 206, 195, 211, 164, 221, 216, 197, 192, 207, 217, 202, 183, 190, 221, 152, 220, 198, 201, 201, 149, 108, 151, 102, 152, 130, 126, 186, 211, 215, 134, 148, 166, 193, 197, 175, 132, 142, 140, 202, 197, 187, 176, 207, 219, 198, 202, 194, 192, 198, 209, 202, 209, 171, 103, 125, 151, 153, 129, 130, 224, 199, 208, 203, 189, 189, 176, 208, 210, 201, 196, 198, 171, 120, 237, 118, 123, 133, 137, 128, 132, 135, 134, 130, 119, 121, 129, 127, 123, 125, 123, 120, 121, 125, 129, 131, 132, 134, 136, 134, 131, 126, 131, 153, 169, 170, 170, 175, 177, 176, 173, 170, 166, 163, 166, 167, 167, 170, 175, 174, 168, 167, 167, 165, 164, 166, 167, 166, 164, 164, 164, 160, 165, 170, 171, 173, 158, 188, 126, 51, 54, 42, 57, 94, 159, 54, 84, 120, 130, 125, 130, 128, 130, 126, 128, 123, 118, 125, 72, 44, 41, 45, 50, 64, 73, 71, 65, 71, 82, 102, 112, 100, 82, 63, 30, 30, 29, 30, 50, 59, 36, 38, 38, 34, 26, 21, 115, 173, 140, 139, 134, 131, 130, 129, 127, 123, 117, 108, 100, 91, 77, 67, 69, 55, 48, 46, 44, 43, 59, 49, 96, 58, 48, 64, 73, 68, 191, 162, 171, 172, 179, 179, 178, 180, 179, 180, 180, 180, 180, 180, 180, 179, 178, 179, 180, 179, 175, 177, 179, 181, 182, 182, 180, 178, 178, 179, 181, 182, 184, 184, 184, 184, 180, 181, 173, 160, 156, 193, 203, 224, 157, 173, 221, 217, 202, 192, 217, 196, 203, 204, 203, 153, 213, 198, 207, 206, 206, 168, 119, 109, 113, 120, 146, 201, 225, 181, 151, 205, 166, 170, 175, 190, 183, 198, 160, 174, 216, 199, 179, 219, 212, 201, 205, 212, 207, 197, 200, 199, 223, 206, 138, 109, 146, 149, 142, 165, 229, 183, 161, 151, 146, 139, 121, 154, 172, 207, 205, 215, 145, 189, 104, 82, 137, 143, 139, 130, 136, 134, 131, 127, 119, 123, 132, 129, 125, 129, 128, 122, 117, 126, 134, 133, 125, 131, 136, 127, 119, 118, 129, 151, 164, 167, 170, 173, 174, 173, 172, 170, 168, 166, 168, 168, 166, 167, 169, 167, 164, 166, 166, 164, 164, 165, 166, 165, 164, 164, 162, 160, 165, 170, 168, 171, 166, 180, 118, 49, 63, 50, 54, 66, 199, 160, 86, 138, 134, 127, 134, 130, 132, 127, 126, 122, 118, 117, 60, 36, 28, 31, 37, 52, 62, 61, 57, 62, 58, 55, 62, 68, 76, 81, 29, 28, 28, 30, 47, 55, 33, 39, 36, 34, 29, 20, 111, 173, 144, 138, 133, 132, 132, 129, 127, 124, 117, 109, 100, 91, 77, 67, 68, 63, 49, 41, 51, 55, 56, 71, 139, 76, 39, 65, 73, 80, 207, 171, 173, 173, 177, 176, 178, 178, 178, 179, 179, 180, 181, 181, 183, 182, 181, 181, 182, 180, 177, 176, 177, 179, 180, 179, 178, 176, 177, 177, 177, 179, 182, 184, 186, 184, 185, 181, 179, 169, 152, 168, 218, 183, 170, 128, 140, 185, 220, 209, 179, 202, 223, 212, 237, 184, 131, 211, 241, 191, 207, 194, 206, 217, 219, 201, 173, 220, 217, 168, 158, 229, 193, 197, 177, 174, 174, 201, 179, 165, 224, 200, 173, 211, 203, 210, 176, 189, 195, 208, 211, 186, 197, 217, 189, 113, 128, 151, 178, 195, 209, 173, 152, 148, 162, 163, 146, 130, 157, 192, 178, 147, 163, 119, 94, 153, 139, 136, 130, 132, 134, 131, 129, 130, 124, 128, 134, 129, 126, 130, 130, 123, 115, 120, 131, 134, 130, 137, 141, 127, 124, 134, 149, 160, 160, 161, 168, 170, 171, 172, 173, 173, 171, 170, 169, 167, 165, 163, 164, 162, 160, 160, 159, 157, 159, 162, 164, 164, 164, 164, 161, 160, 165, 169, 165, 165, 165, 166, 94, 42, 61, 47, 60, 63, 156, 69, 110, 122, 130, 134, 136, 129, 134, 126, 124, 121, 122, 111, 50, 40, 37, 39, 36, 42, 55, 60, 48, 36, 31, 41, 51, 54, 60, 62, 28, 27, 27, 27, 39, 49, 35, 40, 31, 28, 27, 17, 107, 170, 143, 135, 131, 133, 133, 129, 128, 124, 118, 109, 101, 92, 78, 68, 71, 65, 47, 37, 50, 55, 49, 63, 151, 101, 61, 73, 69, 81, 215, 171, 171, 171, 176, 176, 180, 177, 178, 178, 179, 179, 179, 179, 181, 180, 179, 181, 182, 180, 178, 176, 177, 180, 180, 179, 176, 174, 176, 175, 174, 176, 179, 182, 185, 184, 184, 177, 178, 172, 158, 142, 186, 204, 237, 216, 164, 129, 152, 205, 219, 209, 210, 205, 179, 160, 56, 118, 179, 209, 193, 193, 193, 191, 196, 204, 210, 195, 208, 219, 133, 192, 210, 207, 195, 201, 197, 194, 210, 177, 208, 201, 169, 170, 214, 230, 115, 115, 117, 170, 204, 206, 193, 208, 202, 127, 126, 152, 196, 202, 165, 153, 156, 148, 141, 140, 150, 144, 128, 112, 148, 144, 134, 117, 143, 147, 133, 137, 127, 125, 131, 130, 133, 135, 128, 130, 133, 128, 125, 128, 127, 123, 121, 117, 124, 135, 138, 135, 123, 104, 105, 123, 145, 158, 160, 160, 165, 167, 169, 171, 174, 174, 174, 174, 170, 167, 165, 162, 163, 164, 166, 166, 164, 162, 161, 162, 162, 161, 164, 165, 162, 160, 166, 169, 162, 166, 169, 162, 67, 45, 65, 64, 71, 75, 103, 76, 110, 130, 131, 133, 135, 127, 132, 126, 122, 121, 117, 94, 35, 42, 44, 48, 44, 48, 55, 51, 49, 59, 60, 59, 67, 74, 77, 81, 26, 27, 27, 24, 33, 45, 37, 43, 27, 23, 25, 15, 103, 167, 142, 132, 129, 133, 133, 129, 129, 125, 119, 110, 101, 92, 78, 68, 72, 59, 45, 41, 48, 51, 57, 49, 135, 129, 108, 82, 63, 69, 207, 163, 166, 170, 177, 176, 180, 176, 177, 177, 177, 177, 177, 177, 177, 176, 176, 178, 180, 179, 177, 178, 179, 181, 181, 180, 177, 175, 176, 175, 173, 173, 176, 181, 184, 190, 177, 177, 174, 175, 167, 133, 83, 114, 104, 138, 167, 173, 139, 108, 92, 109, 112, 119, 126, 166, 196, 145, 112, 194, 205, 205, 207, 207, 206, 194, 211, 214, 186, 151, 156, 198, 207, 126, 50, 37, 54, 80, 179, 191, 206, 211, 180, 159, 196, 224, 97, 127, 111, 156, 194, 199, 193, 207, 184, 121, 124, 146, 183, 204, 153, 143, 155, 156, 141, 140, 164, 143, 113, 110, 149, 132, 127, 134, 149, 132, 134, 128, 131, 129, 132, 133, 136, 138, 129, 128, 133, 131, 128, 128, 126, 125, 130, 122, 121, 130, 138, 134, 123, 116, 118, 126, 136, 146, 153, 159, 161, 164, 167, 170, 173, 175, 176, 176, 171, 168, 165, 160, 158, 158, 161, 166, 166, 163, 163, 163, 162, 161, 164, 165, 162, 161, 167, 169, 160, 165, 168, 158, 46, 55, 83, 99, 71, 83, 88, 117, 118, 123, 126, 129, 133, 125, 132, 126, 121, 122, 112, 83, 28, 38, 37, 42, 44, 42, 43, 39, 44, 61, 64, 57, 59, 59, 55, 54, 25, 27, 28, 29, 30, 30, 27, 27, 29, 26, 22, 20, 72, 181, 148, 135, 126, 128, 129, 125, 122, 121, 116, 109, 102, 93, 79, 67, 73, 63, 48, 41, 49, 49, 69, 51, 119, 129, 112, 74, 58, 84, 193, 173, 162, 169, 176, 176, 176, 176, 177, 177, 179, 179, 180, 180, 179, 179, 178, 177, 175, 173, 171, 171, 172, 174, 176, 177, 179, 180, 175, 175, 177, 175, 175, 176, 178, 183, 179, 180, 185, 183, 162, 134, 217, 196, 207, 203, 171, 154, 131, 122, 121, 98, 93, 99, 99, 125, 182, 228, 180, 140, 156, 159, 176, 196, 186, 175, 157, 130, 135, 169, 196, 217, 177, 100, 45, 55, 69, 27, 88, 219, 190, 207, 201, 191, 140, 226, 118, 124, 109, 145, 202, 219, 136, 197, 177, 121, 135, 136, 122, 118, 117, 127, 138, 140, 146, 137, 123, 99, 101, 152, 118, 122, 137, 140, 137, 132, 129, 128, 130, 132, 132, 131, 133, 134, 133, 130, 129, 129, 128, 127, 128, 126, 125, 121, 126, 135, 136, 133, 135, 142, 156, 158, 150, 126, 131, 171, 165, 154, 166, 165, 171, 168, 181, 177, 176, 170, 162, 161, 163, 164, 161, 158, 159, 160, 161, 162, 163, 164, 164, 157, 159, 158, 170, 162, 165, 164, 163, 137, 49, 52, 84, 85, 66, 79, 99, 102, 119, 125, 130, 128, 131, 131, 127, 130, 116, 124, 99, 50, 36, 34, 27, 46, 47, 33, 31, 34, 39, 49, 46, 51, 62, 63, 59, 54, 26, 27, 28, 29, 28, 28, 27, 25, 27, 24, 21, 19, 70, 179, 147, 135, 127, 128, 129, 125, 123, 121, 116, 110, 102, 93, 79, 67, 71, 64, 51, 43, 47, 43, 58, 53, 125, 137, 118, 79, 59, 81, 193, 175, 164, 171, 177, 175, 175, 176, 177, 178, 179, 181, 182, 181, 177, 177, 178, 178, 177, 177, 176, 179, 180, 181, 181, 182, 182, 183, 182, 183, 183, 180, 178, 177, 178, 176, 183, 185, 175, 178, 169, 118, 170, 198, 194, 192, 200, 202, 208, 214, 208, 214, 221, 207, 213, 221, 207, 209, 205, 203, 198, 178, 158, 146, 139, 155, 173, 199, 193, 196, 198, 183, 103, 31, 55, 40, 49, 64, 32, 104, 207, 203, 208, 214, 153, 180, 155, 128, 134, 142, 194, 215, 183, 184, 187, 111, 141, 142, 125, 143, 147, 132, 136, 136, 120, 103, 101, 119, 130, 83, 124, 145, 136, 132, 131, 128, 125, 126, 129, 132, 131, 131, 132, 133, 132, 129, 131, 131, 128, 127, 126, 126, 127, 126, 130, 137, 140, 137, 136, 137, 140, 159, 174, 186, 173, 134, 144, 159, 149, 159, 168, 179, 165, 174, 171, 164, 160, 161, 166, 168, 166, 161, 159, 160, 162, 163, 164, 165, 165, 158, 161, 160, 169, 163, 166, 159, 154, 120, 52, 61, 91, 81, 56, 83, 99, 106, 117, 120, 129, 128, 128, 127, 124, 132, 118, 121, 93, 49, 31, 24, 24, 57, 77, 75, 60, 38, 32, 47, 47, 42, 47, 55, 61, 67, 26, 26, 27, 28, 27, 26, 24, 21, 24, 22, 19, 16, 67, 175, 147, 135, 128, 129, 129, 126, 125, 123, 118, 111, 104, 94, 79, 68, 69, 66, 53, 44, 49, 46, 59, 47, 124, 136, 116, 81, 64, 82, 192, 175, 166, 173, 177, 175, 175, 177, 177, 179, 180, 181, 182, 182, 179, 179, 178, 177, 176, 175, 173, 175, 178, 180, 182, 184, 185, 185, 183, 184, 184, 182, 178, 176, 177, 180, 172, 179, 179, 178, 175, 141, 134, 136, 174, 207, 200, 200, 194, 186, 188, 206, 215, 228, 239, 218, 209, 183, 182, 206, 214, 208, 205, 205, 202, 210, 219, 194, 214, 224, 175, 54, 15, 53, 52, 54, 35, 58, 43, 33, 142, 202, 196, 207, 157, 152, 194, 113, 120, 139, 210, 203, 209, 227, 179, 123, 114, 148, 137, 130, 143, 152, 115, 71, 82, 130, 122, 88, 71, 131, 129, 131, 127, 125, 125, 123, 123, 124, 128, 131, 133, 133, 134, 132, 130, 128, 132, 133, 130, 127, 125, 126, 129, 129, 127, 125, 128, 134, 142, 149, 150, 136, 131, 144, 171, 180, 139, 127, 144, 142, 162, 159, 170, 164, 166, 164, 162, 162, 163, 163, 160, 162, 164, 163, 164, 164, 163, 163, 163, 159, 159, 159, 164, 162, 166, 155, 151, 99, 54, 60, 87, 63, 50, 104, 96, 109, 116, 118, 124, 126, 126, 123, 119, 133, 120, 113, 81, 44, 34, 26, 25, 54, 78, 81, 69, 50, 37, 39, 30, 22, 24, 30, 40, 48, 27, 27, 27, 28, 27, 25, 24, 20, 24, 22, 18, 14, 65, 172, 145, 136, 130, 129, 128, 126, 128, 125, 120, 112, 105, 94, 80, 68, 72, 69, 53, 40, 48, 46, 59, 50, 129, 137, 111, 79, 66, 82, 187, 173, 167, 174, 177, 176, 176, 177, 178, 179, 181, 181, 183, 182, 181, 181, 181, 179, 179, 178, 176, 176, 177, 180, 182, 183, 183, 182, 176, 177, 178, 178, 176, 175, 175, 177, 174, 176, 174, 175, 182, 175, 144, 123, 129, 147, 149, 174, 176, 178, 173, 161, 131, 124, 95, 86, 129, 203, 221, 194, 189, 195, 207, 205, 229, 197, 179, 190, 167, 99, 59, 63, 38, 60, 41, 44, 40, 36, 70, 28, 60, 174, 203, 218, 190, 143, 210, 157, 172, 187, 173, 150, 148, 179, 191, 196, 148, 118, 113, 125, 105, 84, 115, 144, 136, 88, 92, 126, 145, 124, 116, 102, 115, 122, 122, 120, 120, 123, 127, 130, 133, 135, 133, 131, 128, 127, 132, 134, 132, 128, 125, 125, 129, 126, 127, 131, 137, 140, 136, 129, 134, 140, 154, 150, 135, 153, 172, 127, 115, 151, 150, 165, 162, 170, 168, 168, 166, 165, 164, 160, 157, 155, 156, 157, 158, 159, 160, 161, 160, 159, 157, 159, 157, 161, 166, 153, 153, 81, 61, 54, 81, 54, 48, 121, 82, 103, 115, 119, 121, 125, 126, 122, 118, 132, 116, 102, 62, 34, 34, 27, 29, 47, 66, 76, 70, 57, 46, 50, 43, 34, 33, 33, 35, 35, 26, 27, 28, 29, 29, 28, 26, 23, 27, 24, 19, 15, 63, 170, 144, 136, 130, 130, 128, 127, 130, 126, 121, 113, 105, 95, 80, 68, 73, 73, 54, 39, 44, 41, 50, 55, 137, 142, 111, 78, 65, 76, 180, 169, 166, 174, 177, 175, 176, 177, 178, 180, 181, 182, 183, 183, 180, 181, 181, 182, 183, 184, 182, 182, 183, 185, 185, 183, 180, 177, 172, 174, 177, 177, 175, 175, 175, 170, 186, 176, 166, 175, 178, 181, 164, 187, 133, 90, 83, 98, 98, 99, 117, 123, 119, 135, 150, 182, 214, 221, 209, 207, 217, 215, 212, 218, 201, 178, 154, 77, 35, 36, 55, 54, 54, 55, 47, 40, 52, 48, 54, 37, 36, 124, 208, 212, 196, 136, 200, 213, 210, 174, 124, 205, 209, 134, 134, 188, 185, 107, 129, 171, 173, 134, 95, 90, 118, 150, 127, 116, 133, 124, 123, 133, 126, 122, 122, 120, 119, 122, 126, 130, 134, 136, 133, 130, 127, 127, 131, 134, 135, 130, 126, 125, 130, 129, 128, 128, 129, 131, 134, 136, 133, 145, 134, 124, 141, 139, 135, 150, 136, 112, 139, 154, 163, 162, 165, 165, 167, 168, 166, 163, 160, 152, 148, 150, 152, 155, 157, 158, 160, 162, 157, 161, 154, 162, 168, 152, 152, 62, 67, 60, 88, 55, 40, 125, 70, 103, 116, 121, 122, 127, 129, 126, 119, 129, 109, 90, 46, 23, 27, 24, 30, 44, 60, 85, 85, 61, 41, 48, 46, 33, 31, 34, 34, 32, 26, 27, 28, 30, 30, 30, 29, 26, 30, 27, 22, 16, 63, 169, 144, 136, 131, 130, 128, 127, 130, 128, 122, 114, 106, 95, 80, 68, 69, 72, 58, 43, 49, 45, 51, 47, 134, 141, 110, 78, 64, 71, 175, 166, 164, 174, 177, 175, 177, 177, 178, 180, 181, 182, 184, 183, 180, 180, 180, 179, 179, 178, 177, 179, 181, 183, 184, 182, 179, 176, 175, 177, 180, 179, 177, 175, 175, 174, 178, 166, 180, 185, 162, 182, 154, 184, 199, 187, 170, 213, 226, 214, 214, 213, 173, 66, 42, 84, 143, 134, 170, 192, 175, 162, 143, 110, 54, 33, 30, 53, 34, 53, 55, 34, 57, 46, 47, 46, 35, 43, 36, 55, 35, 132, 219, 200, 224, 170, 156, 205, 208, 138, 155, 198, 187, 200, 73, 116, 183, 130, 129, 110, 91, 128, 158, 146, 139, 129, 133, 126, 121, 135, 131, 123, 122, 123, 123, 120, 119, 121, 124, 129, 133, 136, 133, 129, 126, 126, 130, 134, 137, 132, 127, 125, 129, 126, 127, 129, 132, 133, 136, 139, 134, 126, 138, 142, 124, 131, 145, 139, 133, 138, 132, 149, 155, 158, 158, 162, 165, 165, 163, 158, 155, 155, 156, 156, 156, 156, 156, 155, 159, 165, 160, 163, 153, 164, 172, 153, 149, 47, 69, 67, 93, 48, 31, 133, 75, 114, 122, 122, 122, 127, 131, 130, 119, 125, 103, 82, 36, 17, 28, 28, 34, 36, 38, 63, 77, 66, 44, 39, 35, 32, 31, 32, 38, 42, 26, 26, 26, 26, 25, 25, 24, 28, 22, 21, 21, 17, 68, 161, 156, 123, 133, 121, 130, 124, 126, 122, 119, 111, 104, 98, 84, 68, 67, 63, 53, 41, 49, 54, 61, 45, 126, 135, 103, 71, 66, 76, 179, 173, 169, 168, 168, 168, 172, 171, 169, 169, 174, 179, 180, 177, 172, 175, 177, 178, 178, 182, 186, 189, 188, 184, 180, 177, 176, 176, 180, 173, 178, 179, 187, 173, 183, 180, 158, 192, 172, 171, 168, 162, 133, 138, 130, 143, 142, 170, 198, 201, 197, 220, 208, 191, 150, 89, 29, 75, 54, 76, 58, 42, 45, 47, 99, 151, 187, 112, 49, 64, 45, 48, 34, 35, 43, 43, 34, 53, 59, 38, 70, 174, 205, 170, 204, 194, 147, 195, 214, 159, 171, 208, 203, 196, 172, 78, 140, 121, 66, 87, 132, 159, 138, 139, 132, 125, 130, 134, 132, 136, 142, 143, 127, 121, 122, 123, 126, 128, 130, 135, 133, 129, 128, 130, 127, 121, 120, 124, 125, 122, 123, 128, 127, 128, 127, 128, 132, 131, 129, 133, 132, 134, 132, 127, 134, 140, 133, 131, 149, 136, 116, 145, 161, 157, 156, 153, 151, 155, 155, 151, 150, 156, 158, 156, 155, 155, 156, 156, 161, 160, 162, 161, 167, 153, 165, 159, 129, 61, 61, 73, 87, 57, 47, 123, 143, 108, 108, 133, 133, 125, 133, 134, 124, 114, 107, 75, 22, 29, 27, 27, 30, 33, 34, 33, 32, 30, 28, 27, 27, 29, 28, 28, 28, 28, 24, 24, 25, 26, 26, 26, 26, 28, 26, 25, 22, 20, 50, 158, 147, 122, 128, 133, 131, 123, 124, 123, 119, 110, 102, 96, 84, 69, 70, 65, 53, 38, 44, 50, 58, 41, 122, 132, 100, 71, 67, 77, 178, 173, 167, 166, 166, 165, 169, 169, 168, 167, 170, 174, 174, 172, 172, 174, 174, 172, 170, 171, 173, 174, 174, 174, 173, 174, 176, 177, 177, 175, 180, 180, 180, 169, 182, 187, 165, 179, 150, 163, 172, 162, 76, 149, 165, 193, 188, 158, 164, 207, 220, 187, 136, 158, 189, 208, 61, 201, 212, 195, 141, 97, 166, 121, 222, 225, 202, 160, 55, 61, 37, 42, 62, 98, 109, 76, 92, 160, 93, 43, 150, 205, 215, 181, 170, 221, 199, 135, 197, 142, 158, 222, 196, 198, 217, 185, 126, 167, 161, 56, 117, 146, 142, 133, 127, 130, 130, 128, 131, 135, 139, 142, 130, 126, 126, 127, 129, 130, 131, 133, 133, 131, 130, 129, 125, 122, 124, 124, 120, 117, 125, 134, 136, 127, 119, 120, 128, 134, 134, 133, 135, 137, 134, 129, 133, 137, 130, 125, 141, 134, 128, 127, 155, 155, 157, 155, 154, 158, 158, 153, 150, 155, 158, 157, 156, 156, 157, 157, 159, 158, 160, 158, 165, 153, 164, 157, 126, 68, 59, 83, 98, 49, 41, 116, 205, 148, 105, 121, 127, 127, 135, 134, 123, 114, 102, 65, 22, 31, 31, 31, 31, 29, 26, 25, 26, 28, 30, 32, 32, 31, 31, 31, 31, 31, 30, 29, 29, 27, 25, 23, 22, 21, 22, 21, 19, 24, 34, 155, 147, 127, 125, 142, 130, 123, 124, 125, 121, 111, 101, 95, 83, 71, 71, 67, 53, 37, 44, 51, 61, 42, 122, 132, 100, 70, 66, 76, 178, 171, 165, 164, 163, 163, 165, 168, 167, 165, 167, 169, 168, 166, 168, 169, 171, 171, 172, 172, 174, 173, 173, 173, 172, 172, 173, 173, 174, 172, 173, 180, 190, 180, 165, 178, 176, 175, 195, 179, 133, 75, 55, 51, 83, 54, 162, 209, 128, 115, 175, 199, 128, 113, 154, 199, 57, 170, 231, 235, 171, 93, 178, 89, 198, 168, 147, 56, 38, 41, 39, 84, 152, 141, 133, 151, 154, 122, 77, 131, 242, 210, 193, 237, 225, 216, 210, 148, 132, 159, 197, 202, 206, 220, 220, 235, 148, 137, 225, 114, 20, 122, 144, 131, 137, 141, 133, 127, 131, 134, 134, 138, 133, 132, 132, 134, 134, 134, 134, 133, 131, 131, 129, 127, 128, 129, 120, 113, 105, 91, 85, 98, 117, 125, 123, 120, 121, 126, 131, 134, 135, 136, 135, 131, 132, 134, 128, 119, 129, 133, 142, 112, 152, 158, 154, 150, 152, 159, 162, 158, 155, 156, 157, 155, 156, 156, 157, 158, 157, 156, 156, 152, 162, 154, 160, 156, 114, 64, 52, 86, 98, 53, 57, 82, 189, 137, 106, 127, 126, 126, 128, 126, 117, 116, 99, 54, 25, 29, 29, 29, 31, 29, 26, 25, 27, 29, 31, 32, 32, 31, 31, 31, 31, 31, 27, 27, 29, 30, 31, 32, 32, 30, 30, 25, 20, 24, 25, 121, 163, 136, 129, 138, 128, 124, 128, 125, 121, 112, 101, 93, 83, 71, 70, 68, 56, 40, 45, 54, 66, 48, 127, 134, 100, 68, 64, 74, 175, 169, 164, 163, 162, 162, 166, 167, 166, 166, 166, 166, 165, 164, 166, 167, 169, 171, 173, 173, 172, 171, 171, 171, 171, 171, 171, 170, 169, 181, 174, 166, 174, 184, 161, 168, 170, 122, 108, 109, 132, 144, 145, 130, 144, 124, 110, 153, 189, 173, 103, 143, 169, 174, 188, 196, 123, 111, 95, 98, 99, 116, 191, 141, 62, 71, 56, 40, 54, 47, 42, 119, 151, 134, 148, 133, 134, 132, 141, 196, 195, 190, 143, 115, 130, 165, 192, 195, 115, 104, 200, 190, 160, 179, 183, 171, 188, 120, 183, 154, 45, 132, 144, 136, 136, 141, 138, 133, 130, 130, 132, 134, 135, 136, 137, 138, 137, 136, 135, 134, 132, 130, 127, 127, 129, 132, 131, 122, 112, 103, 97, 92, 91, 105, 118, 126, 126, 123, 125, 129, 132, 133, 132, 130, 128, 127, 124, 121, 127, 132, 141, 109, 146, 149, 153, 156, 157, 164, 164, 161, 157, 158, 157, 156, 154, 154, 156, 157, 154, 154, 153, 148, 158, 153, 155, 156, 97, 63, 66, 97, 80, 49, 61, 51, 132, 112, 116, 128, 125, 130, 129, 124, 118, 120, 96, 41, 26, 26, 24, 24, 28, 31, 32, 34, 34, 32, 29, 28, 28, 29, 28, 28, 28, 28, 28, 28, 28, 27, 25, 24, 23, 20, 21, 18, 20, 20, 22, 70, 171, 137, 136, 129, 128, 124, 128, 122, 121, 114, 103, 93, 82, 71, 69, 69, 59, 42, 45, 52, 64, 48, 127, 133, 98, 67, 64, 75, 173, 167, 163, 163, 164, 164, 168, 166, 167, 167, 167, 166, 166, 166, 170, 169, 170, 171, 172, 170, 166, 165, 167, 168, 170, 171, 171, 171, 178, 164, 165, 181, 165, 172, 187, 179, 116, 117, 216, 216, 132, 97, 129, 144, 118, 128, 156, 171, 194, 120, 69, 119, 134, 146, 174, 175, 199, 200, 208, 200, 194, 200, 199, 218, 115, 159, 125, 136, 86, 45, 53, 35, 85, 82, 76, 132, 190, 194, 189, 206, 201, 204, 157, 127, 105, 74, 154, 221, 152, 101, 205, 193, 128, 111, 176, 94, 89, 98, 89, 95, 99, 77, 141, 153, 137, 130, 137, 138, 127, 125, 132, 133, 135, 138, 139, 140, 139, 136, 135, 134, 133, 130, 130, 129, 125, 120, 114, 109, 109, 121, 124, 113, 100, 105, 119, 132, 131, 129, 128, 128, 132, 133, 131, 128, 123, 118, 116, 123, 127, 128, 131, 119, 142, 141, 153, 162, 160, 164, 164, 159, 156, 157, 157, 155, 153, 153, 153, 154, 152, 154, 151, 145, 154, 151, 149, 156, 88, 67, 76, 108, 73, 46, 50, 60, 121, 115, 122, 117, 122, 133, 131, 123, 116, 123, 93, 28, 27, 25, 24, 25, 28, 29, 30, 31, 32, 31, 30, 29, 29, 29, 29, 28, 28, 28, 28, 29, 30, 31, 32, 33, 34, 26, 26, 24, 26, 18, 17, 26, 169, 134, 139, 123, 130, 125, 127, 121, 121, 115, 104, 94, 81, 69, 70, 70, 60, 43, 43, 49, 59, 45, 122, 130, 96, 66, 64, 76, 171, 165, 163, 163, 164, 165, 169, 166, 168, 168, 168, 167, 167, 168, 171, 170, 170, 173, 174, 172, 168, 168, 169, 171, 172, 172, 171, 170, 170, 178, 171, 167, 163, 174, 149, 185, 170, 115, 163, 197, 168, 99, 177, 193, 159, 112, 117, 123, 142, 68, 107, 181, 131, 69, 54, 89, 127, 112, 158, 174, 201, 206, 207, 194, 220, 204, 177, 141, 161, 174, 182, 170, 184, 187, 229, 225, 190, 186, 203, 200, 207, 197, 213, 236, 208, 193, 208, 151, 94, 87, 172, 204, 172, 76, 230, 96, 68, 81, 66, 41, 78, 89, 112, 153, 143, 121, 135, 142, 126, 125, 135, 135, 134, 135, 138, 140, 139, 136, 135, 135, 134, 132, 134, 131, 118, 107, 108, 115, 130, 137, 128, 119, 122, 133, 139, 137, 130, 129, 134, 135, 136, 133, 131, 127, 120, 112, 110, 123, 127, 126, 124, 135, 151, 145, 151, 155, 151, 157, 157, 153, 151, 153, 153, 151, 149, 150, 151, 151, 150, 155, 151, 143, 152, 147, 145, 157, 86, 66, 69, 109, 78, 56, 49, 84, 125, 113, 121, 114, 123, 129, 123, 115, 111, 120, 88, 21, 29, 28, 28, 26, 29, 26, 23, 23, 26, 28, 31, 33, 33, 33, 31, 30, 30, 30, 24, 25, 25, 26, 28, 30, 31, 33, 21, 23, 23, 24, 15, 27, 130, 144, 133, 132, 123, 130, 126, 126, 123, 113, 103, 95, 83, 70, 76, 73, 55, 42, 41, 58, 60, 49, 120, 132, 89, 65, 63, 82, 170, 160, 172, 161, 167, 164, 169, 168, 170, 173, 173, 173, 171, 169, 169, 170, 171, 170, 169, 168, 166, 165, 166, 167, 168, 170, 172, 173, 176, 176, 175, 172, 170, 170, 171, 173, 164, 147, 130, 144, 183, 176, 161, 136, 159, 155, 129, 99, 90, 92, 142, 149, 113, 129, 106, 126, 118, 137, 116, 123, 110, 114, 127, 138, 154, 167, 148, 119, 108, 98, 120, 175, 192, 179, 176, 173, 182, 180, 177, 156, 181, 176, 167, 176, 178, 165, 147, 155, 166, 138, 99, 93, 73, 55, 223, 160, 62, 63, 64, 46, 89, 85, 62, 100, 127, 135, 140, 142, 136, 135, 137, 135, 132, 130, 131, 134, 136, 134, 129, 122, 123, 114, 117, 119, 102, 113, 137, 136, 133, 139, 142, 140, 137, 136, 133, 130, 129, 131, 133, 135, 133, 128, 125, 129, 124, 116, 116, 125, 136, 129, 117, 132, 150, 139, 146, 155, 148, 152, 143, 152, 150, 149, 156, 155, 146, 152, 153, 148, 147, 154, 150, 148, 157, 134, 148, 142, 76, 64, 91, 115, 69, 55, 46, 86, 113, 117, 121, 119, 126, 126, 116, 114, 125, 110, 56, 15, 30, 23, 36, 12, 34, 28, 31, 29, 27, 25, 25, 27, 30, 30, 27, 25, 26, 27, 22, 24, 25, 27, 28, 28, 28, 30, 23, 22, 28, 22, 18, 17, 66, 150, 140, 133, 125, 127, 127, 126, 122, 112, 102, 94, 83, 70, 75, 75, 57, 42, 39, 52, 53, 45, 116, 128, 85, 66, 60, 86, 173, 167, 173, 164, 167, 164, 167, 165, 166, 170, 172, 172, 170, 168, 168, 169, 170, 170, 169, 167, 165, 166, 166, 167, 167, 169, 169, 170, 174, 171, 169, 171, 174, 173, 168, 164, 166, 166, 161, 166, 156, 88, 139, 218, 228, 159, 106, 139, 206, 226, 190, 179, 142, 114, 129, 170, 151, 175, 179, 188, 173, 166, 159, 135, 97, 75, 81, 90, 93, 83, 57, 44, 52, 100, 143, 159, 190, 190, 171, 139, 183, 209, 212, 209, 194, 210, 209, 188, 178, 181, 195, 173, 113, 48, 114, 191, 101, 54, 55, 69, 60, 47, 39, 36, 59, 98, 104, 102, 106, 114, 122, 130, 117, 116, 117, 107, 93, 86, 87, 102, 117, 125, 128, 127, 133, 153, 164, 156, 146, 143, 141, 138, 137, 131, 127, 123, 124, 126, 129, 130, 136, 136, 132, 128, 122, 123, 135, 129, 118, 117, 132, 147, 149, 144, 147, 182, 196, 161, 157, 171, 186, 184, 184, 184, 180, 167, 144, 140, 149, 145, 144, 148, 149, 140, 151, 135, 75, 70, 107, 114, 59, 55, 58, 95, 113, 112, 119, 120, 125, 126, 119, 117, 120, 111, 31, 16, 24, 28, 30, 30, 30, 21, 24, 23, 22, 21, 22, 25, 29, 30, 27, 25, 26, 27, 22, 23, 26, 27, 28, 27, 26, 26, 28, 23, 28, 16, 25, 20, 16, 152, 154, 137, 127, 125, 127, 125, 121, 112, 102, 94, 84, 71, 74, 76, 60, 45, 39, 51, 52, 47, 117, 129, 82, 65, 56, 91, 170, 168, 167, 164, 165, 165, 165, 162, 163, 167, 169, 169, 168, 167, 166, 167, 168, 168, 167, 166, 165, 166, 166, 166, 166, 166, 167, 167, 171, 168, 166, 167, 169, 172, 172, 172, 161, 180, 182, 169, 173, 155, 98, 81, 161, 234, 221, 204, 198, 169, 218, 195, 129, 127, 139, 167, 162, 154, 160, 171, 167, 169, 175, 182, 178, 179, 168, 148, 138, 130, 116, 100, 87, 87, 82, 80, 101, 110, 136, 141, 172, 170, 170, 182, 187, 177, 163, 166, 162, 115, 63, 43, 47, 68, 80, 180, 140, 72, 87, 87, 80, 94, 127, 121, 138, 138, 123, 115, 117, 108, 95, 90, 89, 87, 90, 102, 118, 127, 128, 137, 151, 164, 145, 123, 136, 162, 160, 148, 139, 136, 131, 126, 125, 128, 128, 125, 125, 126, 127, 126, 134, 131, 124, 126, 132, 129, 123, 110, 113, 128, 140, 137, 135, 145, 139, 169, 200, 178, 198, 190, 191, 184, 181, 189, 200, 181, 142, 138, 152, 143, 142, 147, 141, 146, 150, 122, 67, 69, 122, 113, 51, 49, 59, 99, 115, 112, 119, 120, 125, 125, 120, 118, 112, 106, 17, 25, 23, 26, 13, 34, 26, 24, 25, 22, 22, 21, 22, 25, 29, 30, 27, 24, 26, 27, 24, 25, 27, 28, 28, 28, 27, 24, 29, 26, 25, 17, 28, 31, 9, 123, 162, 141, 133, 126, 127, 123, 120, 111, 101, 94, 84, 71, 73, 78, 63, 46, 40, 53, 54, 54, 120, 129, 77, 64, 50, 98, 162, 166, 158, 164, 165, 168, 166, 161, 164, 166, 168, 169, 167, 166, 163, 164, 166, 166, 166, 165, 163, 164, 165, 166, 165, 166, 167, 167, 169, 170, 168, 163, 162, 167, 175, 163, 166, 165, 170, 174, 169, 180, 181, 161, 130, 134, 184, 208, 201, 205, 188, 194, 219, 193, 182, 196, 185, 151, 169, 176, 169, 165, 170, 168, 167, 167, 159, 164, 173, 161, 164, 175, 177, 163, 157, 159, 149, 137, 149, 131, 143, 135, 127, 125, 122, 122, 118, 114, 105, 95, 107, 129, 140, 125, 53, 166, 168, 88, 158, 153, 153, 150, 155, 150, 158, 162, 156, 156, 162, 162, 159, 158, 155, 157, 160, 158, 155, 156, 159, 157, 142, 123, 118, 130, 143, 142, 140, 137, 135, 136, 132, 126, 126, 123, 121, 120, 123, 126, 128, 128, 134, 136, 130, 126, 126, 126, 124, 129, 140, 144, 142, 151, 172, 190, 176, 175, 185, 178, 177, 148, 155, 183, 186, 175, 176, 166, 144, 144, 155, 146, 144, 145, 137, 147, 144, 110, 63, 69, 129, 107, 47, 47, 54, 97, 118, 117, 121, 119, 125, 124, 124, 116, 107, 95, 32, 21, 26, 30, 9, 32, 27, 30, 26, 24, 25, 23, 23, 26, 28, 29, 26, 25, 26, 27, 28, 28, 28, 28, 28, 29, 30, 27, 24, 25, 23, 26, 24, 28, 16, 67, 158, 146, 141, 130, 125, 122, 118, 110, 101, 94, 84, 71, 77, 79, 64, 45, 37, 49, 52, 56, 118, 125, 70, 62, 47, 105, 163, 170, 155, 168, 168, 173, 170, 162, 165, 167, 168, 168, 166, 164, 161, 163, 164, 165, 165, 164, 163, 164, 164, 165, 166, 168, 169, 170, 170, 169, 167, 165, 164, 165, 167, 172, 156, 174, 173, 163, 175, 184, 165, 171, 169, 136, 96, 120, 176, 204, 226, 210, 198, 213, 154, 117, 131, 120, 169, 170, 171, 180, 185, 190, 177, 165, 159, 165, 176, 167, 166, 161, 161, 162, 171, 186, 181, 172, 175, 145, 161, 171, 172, 162, 174, 180, 163, 154, 162, 159, 146, 154, 161, 155, 72, 141, 209, 125, 117, 146, 149, 162, 171, 179, 170, 172, 176, 173, 167, 165, 167, 167, 176, 173, 166, 172, 180, 178, 165, 156, 147, 125, 122, 137, 134, 132, 134, 132, 132, 135, 133, 128, 128, 122, 119, 118, 121, 124, 124, 123, 132, 133, 121, 105, 104, 116, 126, 142, 152, 148, 145, 154, 175, 189, 188, 170, 160, 176, 156, 136, 157, 187, 180, 144, 124, 137, 147, 150, 149, 146, 143, 140, 134, 144, 136, 103, 69, 76, 131, 95, 47, 57, 61, 99, 117, 115, 122, 120, 124, 122, 129, 112, 112, 101, 82, 17, 23, 29, 20, 29, 27, 29, 20, 23, 21, 20, 21, 24, 27, 29, 27, 25, 26, 27, 29, 29, 28, 28, 28, 30, 31, 29, 23, 25, 24, 32, 22, 21, 21, 33, 141, 155, 145, 132, 125, 118, 118, 108, 102, 94, 84, 74, 78, 81, 65, 42, 36, 48, 48, 55, 112, 124, 66, 62, 46, 112, 165, 171, 161, 172, 170, 172, 169, 163, 164, 166, 167, 166, 165, 164, 162, 162, 164, 164, 165, 163, 162, 163, 164, 165, 167, 169, 170, 171, 171, 169, 168, 169, 169, 166, 162, 165, 173, 168, 168, 176, 170, 182, 169, 184, 165, 177, 155, 107, 137, 201, 103, 70, 119, 177, 220, 186, 112, 135, 182, 164, 161, 168, 168, 167, 170, 183, 182, 169, 167, 173, 184, 171, 175, 179, 173, 171, 169, 158, 176, 170, 178, 173, 168, 163, 163, 181, 179, 162, 173, 173, 161, 163, 150, 159, 104, 98, 227, 140, 85, 182, 176, 159, 151, 159, 171, 168, 169, 169, 165, 164, 165, 163, 168, 171, 174, 171, 164, 161, 162, 162, 148, 123, 127, 141, 127, 121, 128, 127, 126, 127, 125, 122, 122, 126, 126, 126, 127, 126, 120, 112, 111, 108, 101, 103, 121, 136, 141, 141, 148, 158, 159, 152, 157, 177, 189, 168, 155, 184, 162, 151, 169, 198, 184, 141, 118, 134, 145, 144, 141, 143, 144, 135, 139, 138, 133, 95, 72, 85, 133, 86, 46, 61, 75, 108, 117, 111, 122, 123, 124, 123, 129, 110, 117, 117, 121, 27, 22, 23, 25, 25, 27, 25, 18, 23, 20, 20, 22, 25, 28, 30, 27, 25, 25, 26, 28, 28, 29, 27, 27, 29, 31, 27, 27, 27, 27, 26, 23, 22, 24, 23, 94, 156, 146, 133, 129, 113, 121, 106, 105, 92, 82, 80, 77, 82, 69, 41, 45, 57, 48, 57, 103, 131, 64, 66, 44, 114, 156, 157, 162, 166, 164, 161, 162, 163, 163, 162, 161, 161, 161, 161, 160, 160, 161, 163, 165, 165, 163, 164, 166, 166, 168, 169, 171, 172, 173, 171, 169, 169, 170, 170, 169, 168, 169, 170, 171, 173, 176, 178, 174, 169, 180, 169, 174, 141, 101, 206, 219, 141, 99, 101, 102, 158, 99, 166, 172, 160, 166, 168, 176, 176, 176, 175, 172, 172, 175, 179, 181, 180, 178, 175, 173, 172, 172, 170, 170, 172, 171, 170, 167, 165, 171, 170, 167, 159, 163, 153, 168, 161, 156, 157, 95, 83, 214, 210, 85, 119, 163, 186, 163, 165, 168, 168, 154, 156, 180, 188, 175, 167, 174, 174, 175, 177, 169, 160, 159, 159, 127, 104, 124, 140, 138, 139, 137, 134, 131, 133, 137, 137, 132, 124, 117, 108, 99, 93, 95, 100, 114, 125, 135, 142, 148, 150, 152, 156, 155, 154, 151, 144, 153, 184, 191, 160, 148, 163, 152, 145, 166, 182, 158, 133, 141, 147, 139, 143, 145, 144, 148, 141, 153, 134, 132, 75, 67, 88, 133, 79, 46, 48, 84, 121, 127, 112, 122, 127, 127, 124, 118, 113, 109, 116, 125, 44, 27, 26, 25, 26, 29, 29, 26, 25, 26, 26, 27, 28, 29, 29, 27, 25, 25, 25, 28, 28, 29, 28, 28, 29, 31, 28, 27, 27, 27, 28, 26, 22, 26, 8, 46, 112, 144, 138, 125, 124, 124, 111, 105, 90, 81, 78, 77, 83, 71, 43, 45, 58, 51, 55, 95, 126, 61, 63, 43, 112, 154, 152, 155, 159, 158, 157, 159, 159, 160, 160, 160, 161, 162, 163, 160, 160, 162, 165, 167, 167, 164, 166, 165, 167, 169, 170, 171, 173, 174, 172, 169, 169, 170, 170, 168, 169, 169, 170, 171, 173, 175, 177, 177, 174, 174, 178, 199, 182, 111, 159, 199, 170, 155, 163, 140, 141, 136, 170, 170, 169, 171, 175, 176, 177, 178, 177, 174, 173, 174, 176, 179, 179, 177, 174, 172, 170, 169, 169, 170, 170, 171, 170, 168, 167, 171, 173, 164, 169, 176, 178, 186, 173, 154, 156, 130, 82, 165, 225, 158, 112, 113, 137, 179, 181, 186, 177, 170, 183, 205, 195, 169, 161, 168, 171, 170, 170, 171, 166, 152, 161, 145, 121, 112, 107, 97, 92, 101, 103, 101, 100, 99, 96, 89, 88, 98, 116, 127, 133, 141, 150, 156, 156, 150, 144, 141, 144, 150, 152, 152, 153, 150, 144, 149, 168, 191, 183, 171, 166, 148, 135, 127, 118, 110, 109, 125, 138, 141, 142, 143, 141, 143, 145, 155, 139, 122, 70, 64, 96, 136, 63, 48, 51, 88, 120, 125, 115, 122, 125, 122, 118, 115, 114, 101, 106, 134, 52, 22, 26, 30, 25, 24, 29, 27, 25, 25, 25, 25, 26, 26, 26, 25, 25, 25, 25, 28, 28, 29, 27, 27, 29, 31, 26, 27, 27, 28, 34, 35, 30, 36, 15, 22, 69, 129, 135, 121, 131, 120, 115, 103, 91, 84, 84, 75, 81, 69, 44, 43, 55, 53, 54, 87, 124, 64, 67, 54, 122, 163, 158, 155, 156, 154, 151, 152, 153, 154, 157, 159, 162, 166, 168, 164, 164, 165, 166, 167, 164, 161, 162, 162, 164, 165, 167, 168, 169, 169, 168, 167, 168, 170, 171, 170, 169, 170, 170, 170, 172, 174, 176, 187, 166, 167, 173, 161, 173, 168, 119, 106, 141, 165, 163, 168, 161, 166, 167, 162, 173, 174, 180, 175, 176, 177, 177, 175, 172, 172, 172, 175, 176, 176, 175, 174, 173, 172, 171, 172, 172, 174, 174, 174, 174, 174, 187, 171, 163, 168, 172, 151, 163, 175, 129, 90, 134, 195, 230, 210, 224, 174, 111, 143, 178, 208, 211, 192, 175, 176, 182, 183, 180, 200, 202, 183, 166, 170, 175, 162, 159, 157, 151, 148, 149, 150, 149, 161, 166, 166, 169, 169, 168, 165, 164, 160, 154, 154, 157, 155, 147, 152, 156, 156, 154, 151, 151, 153, 153, 152, 155, 155, 151, 152, 161, 164, 159, 152, 132, 119, 132, 140, 128, 121, 117, 114, 122, 134, 139, 135, 132, 135, 142, 141, 136, 114, 65, 62, 116, 132, 51, 48, 59, 97, 119, 122, 120, 122, 122, 118, 117, 120, 120, 102, 109, 141, 55, 19, 23, 29, 23, 20, 25, 25, 23, 25, 25, 25, 25, 25, 26, 24, 23, 23, 23, 28, 28, 29, 27, 28, 29, 31, 28, 29, 25, 25, 32, 33, 25, 31, 22, 15, 36, 107, 133, 123, 131, 112, 117, 103, 93, 89, 88, 73, 78, 68, 44, 41, 53, 54, 58, 81, 122, 65, 66, 57, 123, 163, 157, 154, 156, 156, 154, 154, 156, 156, 157, 158, 160, 162, 164, 159, 159, 162, 166, 167, 165, 162, 161, 162, 163, 164, 166, 167, 168, 168, 166, 165, 167, 170, 171, 171, 170, 170, 170, 171, 172, 173, 175, 172, 178, 178, 168, 156, 158, 174, 168, 176, 163, 160, 171, 168, 159, 167, 161, 157, 173, 175, 179, 174, 172, 173, 176, 174, 171, 170, 169, 170, 171, 173, 175, 175, 174, 173, 171, 171, 172, 174, 177, 178, 179, 173, 170, 174, 183, 167, 151, 146, 154, 155, 99, 120, 218, 216, 212, 188, 217, 229, 169, 101, 135, 159, 178, 189, 194, 188, 184, 187, 192, 207, 206, 188, 171, 174, 178, 167, 159, 155, 155, 157, 160, 159, 157, 167, 170, 167, 162, 157, 152, 149, 154, 161, 167, 169, 167, 165, 165, 168, 169, 167, 163, 161, 160, 162, 159, 156, 157, 156, 152, 149, 149, 136, 117, 104, 97, 105, 129, 137, 137, 138, 132, 119, 119, 129, 132, 126, 124, 128, 140, 128, 132, 105, 60, 60, 133, 107, 47, 48, 71, 110, 117, 118, 124, 121, 121, 118, 116, 124, 121, 109, 125, 140, 48, 21, 22, 25, 24, 21, 22, 22, 23, 25, 25, 25, 25, 25, 25, 23, 20, 20, 20, 28, 28, 29, 27, 28, 29, 31, 30, 30, 24, 22, 31, 32, 22, 21, 26, 19, 20, 93, 137, 129, 129, 106, 118, 103, 95, 91, 89, 73, 77, 69, 45, 42, 53, 57, 59, 76, 121, 66, 67, 62, 127, 166, 160, 159, 165, 168, 165, 165, 165, 165, 164, 165, 165, 166, 167, 163, 164, 168, 172, 174, 171, 167, 166, 166, 167, 169, 170, 172, 173, 174, 172, 170, 170, 171, 171, 170, 170, 170, 170, 170, 171, 173, 174, 175, 178, 174, 164, 182, 169, 167, 148, 175, 166, 155, 157, 148, 160, 161, 165, 161, 174, 175, 172, 168, 168, 170, 174, 174, 171, 169, 168, 169, 170, 172, 172, 171, 168, 166, 165, 165, 167, 170, 173, 176, 178, 184, 163, 169, 169, 142, 128, 167, 136, 132, 126, 190, 213, 188, 203, 211, 195, 213, 198, 205, 174, 142, 112, 117, 158, 201, 203, 177, 164, 168, 171, 169, 165, 167, 170, 165, 168, 160, 150, 157, 160, 155, 153, 150, 151, 152, 154, 156, 160, 164, 157, 154, 155, 154, 153, 158, 166, 166, 165, 166, 164, 161, 160, 160, 161, 159, 156, 153, 152, 149, 144, 137, 128, 128, 122, 105, 108, 125, 135, 135, 128, 123, 125, 131, 134, 129, 125, 127, 143, 130, 136, 94, 58, 60, 131, 63, 48, 51, 82, 120, 117, 115, 126, 120, 122, 121, 113, 119, 112, 113, 144, 130, 36, 27, 22, 19, 28, 29, 22, 23, 25, 23, 23, 23, 23, 22, 22, 20, 19, 19, 19, 30, 28, 27, 26, 28, 31, 33, 30, 27, 23, 23, 30, 31, 24, 21, 29, 24, 20, 87, 140, 121, 124, 109, 121, 106, 98, 92, 86, 81, 80, 70, 53, 44, 55, 56, 56, 75, 116, 71, 65, 71, 136, 171, 168, 168, 172, 175, 173, 172, 171, 171, 172, 173, 174, 174, 175, 172, 173, 175, 176, 176, 174, 171, 172, 172, 172, 173, 174, 175, 175, 178, 176, 174, 172, 171, 171, 171, 171, 169, 166, 169, 172, 173, 171, 178, 162, 170, 163, 164, 162, 159, 157, 153, 161, 168, 163, 161, 168, 153, 158, 157, 166, 169, 169, 169, 168, 168, 171, 172, 172, 168, 165, 169, 170, 170, 170, 169, 166, 164, 163, 162, 163, 166, 170, 172, 172, 165, 161, 171, 162, 121, 133, 221, 238, 213, 151, 130, 158, 202, 218, 209, 207, 208, 167, 116, 123, 169, 223, 194, 144, 158, 191, 188, 178, 169, 162, 158, 159, 163, 164, 162, 169, 165, 159, 165, 169, 167, 167, 165, 162, 158, 155, 154, 155, 156, 159, 156, 153, 154, 159, 161, 159, 157, 156, 158, 161, 164, 164, 162, 159, 156, 154, 153, 153, 152, 149, 144, 138, 138, 133, 116, 111, 120, 133, 135, 129, 125, 126, 129, 133, 132, 129, 130, 140, 133, 129, 85, 55, 63, 120, 45, 45, 51, 95, 119, 119, 116, 125, 124, 120, 119, 110, 106, 108, 120, 144, 122, 31, 28, 24, 23, 24, 27, 27, 23, 23, 19, 20, 21, 23, 23, 23, 22, 21, 22, 22, 32, 27, 24, 24, 28, 31, 32, 33, 28, 23, 25, 28, 27, 25, 22, 28, 22, 21, 66, 137, 108, 121, 111, 117, 106, 100, 94, 89, 88, 84, 70, 59, 46, 55, 53, 55, 76, 110, 73, 59, 74, 138, 170, 170, 169, 171, 174, 173, 172, 173, 173, 174, 175, 175, 174, 173, 171, 172, 173, 173, 173, 173, 172, 174, 173, 174, 174, 174, 175, 176, 178, 176, 174, 173, 171, 171, 171, 171, 168, 165, 169, 172, 172, 168, 169, 167, 163, 161, 161, 160, 158, 158, 159, 160, 161, 162, 161, 161, 161, 160, 160, 163, 166, 167, 167, 168, 167, 167, 170, 171, 168, 163, 166, 167, 168, 170, 171, 170, 167, 165, 164, 164, 167, 169, 168, 166, 167, 168, 165, 170, 127, 104, 133, 120, 105, 99, 63, 82, 196, 153, 122, 166, 194, 142, 113, 154, 111, 80, 117, 146, 169, 188, 172, 159, 159, 158, 156, 159, 162, 164, 165, 162, 161, 162, 165, 167, 168, 168, 162, 158, 153, 154, 155, 157, 158, 157, 154, 151, 152, 154, 157, 158, 159, 157, 153, 154, 159, 160, 156, 153, 153, 152, 151, 149, 148, 147, 144, 141, 139, 135, 128, 122, 117, 121, 128, 132, 131, 126, 124, 128, 129, 130, 129, 130, 130, 118, 79, 54, 67, 110, 48, 41, 53, 106, 113, 120, 115, 119, 124, 115, 114, 108, 100, 110, 127, 137, 108, 29, 25, 22, 24, 19, 22, 27, 20, 22, 20, 20, 23, 25, 25, 25, 23, 23, 23, 24, 32, 28, 24, 24, 26, 27, 28, 33, 29, 27, 27, 29, 29, 27, 23, 28, 20, 21, 37, 142, 123, 130, 114, 116, 103, 99, 95, 93, 89, 84, 71, 60, 46, 54, 54, 55, 70, 108, 71, 59, 78, 140, 168, 168, 168, 170, 172, 172, 171, 172, 172, 172, 172, 171, 170, 169, 168, 168, 169, 170, 170, 170, 170, 170, 170, 172, 173, 175, 176, 177, 179, 175, 171, 172, 174, 172, 168, 167, 169, 170, 170, 170, 169, 168, 171, 168, 164, 163, 163, 162, 160, 160, 161, 161, 162, 162, 162, 161, 162, 161, 161, 162, 164, 165, 163, 163, 163, 164, 166, 166, 165, 162, 164, 164, 165, 168, 170, 170, 169, 165, 165, 165, 167, 166, 163, 159, 164, 171, 163, 163, 159, 152, 140, 111, 140, 154, 73, 115, 185, 140, 104, 85, 104, 192, 86, 93, 134, 112, 136, 160, 169, 179, 165, 149, 152, 158, 164, 162, 158, 158, 164, 164, 159, 156, 158, 162, 163, 161, 159, 157, 156, 155, 156, 155, 153, 154, 154, 154, 157, 158, 157, 154, 150, 148, 147, 150, 152, 151, 149, 148, 149, 149, 148, 147, 146, 145, 143, 138, 134, 137, 141, 136, 124, 116, 120, 130, 131, 125, 122, 125, 126, 128, 126, 126, 125, 114, 74, 59, 69, 96, 45, 44, 61, 112, 112, 119, 114, 116, 119, 109, 108, 103, 107, 117, 133, 136, 83, 20, 24, 19, 17, 20, 24, 23, 19, 24, 24, 23, 24, 26, 26, 25, 23, 23, 24, 25, 33, 29, 26, 25, 27, 27, 26, 31, 28, 27, 27, 27, 27, 26, 23, 26, 19, 24, 22, 145, 153, 136, 115, 117, 109, 106, 100, 97, 91, 84, 72, 62, 44, 52, 54, 56, 64, 105, 73, 64, 91, 150, 165, 164, 164, 167, 170, 170, 169, 170, 170, 170, 170, 169, 167, 166, 165, 165, 167, 169, 169, 169, 169, 168, 168, 170, 172, 174, 176, 177, 177, 172, 168, 169, 171, 169, 165, 163, 167, 171, 170, 166, 164, 165, 169, 167, 162, 161, 161, 160, 159, 160, 160, 161, 162, 162, 161, 160, 164, 163, 161, 162, 164, 163, 161, 161, 161, 162, 162, 163, 163, 163, 162, 162, 163, 166, 170, 169, 168, 164, 164, 165, 164, 161, 157, 154, 162, 167, 161, 151, 152, 158, 154, 147, 165, 118, 59, 171, 184, 143, 154, 128, 46, 174, 197, 153, 114, 118, 151, 172, 171, 170, 159, 145, 155, 162, 162, 159, 155, 156, 158, 160, 157, 153, 155, 159, 162, 161, 161, 161, 160, 160, 159, 156, 151, 149, 150, 152, 155, 156, 152, 146, 141, 140, 142, 146, 148, 147, 145, 144, 145, 146, 147, 147, 148, 148, 144, 140, 137, 139, 143, 141, 135, 126, 121, 121, 122, 123, 123, 121, 121, 126, 124, 124, 122, 110, 66, 61, 69, 79, 43, 48, 69, 119, 115, 121, 118, 117, 117, 106, 103, 102, 119, 134, 141, 124, 55, 20, 25, 20, 17, 24, 28, 24, 25, 27, 23, 21, 21, 25, 27, 26, 23, 22, 23, 24, 33, 30, 27, 26, 27, 28, 26, 27, 27, 26, 25, 25, 24, 24, 29, 25, 21, 23, 15, 114, 155, 131, 107, 113, 113, 113, 105, 101, 93, 85, 74, 63, 43, 49, 55, 55, 55, 100, 72, 69, 102, 157, 162, 161, 161, 164, 167, 168, 167, 168, 168, 169, 168, 167, 167, 166, 165, 166, 168, 169, 170, 170, 170, 170, 170, 170, 172, 172, 173, 174, 172, 168, 163, 162, 163, 163, 162, 161, 164, 167, 164, 161, 159, 160, 166, 164, 160, 158, 158, 157, 156, 158, 159, 161, 162, 162, 162, 162, 165, 164, 162, 163, 164, 163, 162, 163, 163, 163, 162, 162, 163, 167, 163, 162, 163, 166, 167, 166, 164, 161, 162, 162, 159, 156, 154, 153, 158, 149, 153, 153, 160, 157, 151, 171, 156, 111, 88, 212, 190, 129, 147, 183, 113, 105, 222, 237, 157, 143, 148, 141, 138, 145, 147, 138, 156, 162, 157, 156, 157, 156, 152, 155, 156, 156, 157, 158, 159, 161, 159, 158, 159, 162, 164, 163, 161, 157, 155, 157, 158, 158, 154, 149, 148, 149, 152, 152, 150, 147, 143, 143, 144, 145, 147, 149, 151, 152, 148, 146, 144, 140, 134, 132, 132, 126, 117, 109, 110, 119, 123, 119, 119, 126, 123, 125, 120, 108, 59, 61, 69, 64, 43, 49, 75, 124, 115, 122, 116, 109, 108, 104, 107, 110, 130, 139, 133, 92, 30, 27, 21, 23, 22, 28, 28, 26, 32, 29, 24, 19, 19, 25, 28, 26, 22, 22, 23, 23, 29, 27, 25, 25, 27, 27, 26, 25, 26, 27, 26, 24, 23, 23, 31, 24, 27, 24, 19, 73, 136, 138, 111, 114, 114, 114, 105, 101, 94, 86, 76, 65, 42, 47, 56, 53, 48, 95, 68, 65, 102, 154, 159, 159, 160, 163, 166, 167, 166, 167, 167, 168, 169, 168, 168, 167, 166, 167, 170, 171, 172, 173, 173, 172, 172, 171, 170, 170, 169, 169, 166, 164, 160, 156, 155, 157, 160, 161, 160, 160, 157, 155, 154, 155, 160, 158, 154, 152, 152, 152, 151, 154, 155, 158, 160, 161, 162, 163, 165, 164, 163, 165, 166, 166, 165, 165, 167, 166, 165, 164, 167, 172, 166, 165, 164, 165, 165, 163, 160, 158, 158, 159, 155, 152, 154, 157, 157, 142, 148, 140, 146, 146, 144, 162, 160, 113, 91, 171, 149, 162, 155, 155, 165, 118, 114, 110, 123, 147, 147, 150, 149, 137, 140, 152, 154, 155, 158, 161, 161, 156, 150, 152, 157, 161, 158, 155, 154, 157, 153, 150, 152, 154, 159, 160, 159, 158, 156, 154, 154, 154, 153, 150, 152, 155, 156, 156, 153, 150, 148, 146, 146, 147, 148, 149, 149, 150, 147, 145, 144, 142, 139, 133, 129, 128, 123, 117, 115, 120, 121, 118, 118, 127, 126, 128, 121, 106, 52, 58, 66, 56, 44, 49, 76, 126, 114, 116, 105, 91, 94, 102, 115, 125, 134, 122, 100, 51, 13, 31, 13, 10, 21, 26, 26, 22, 25, 34, 30, 28, 21, 21, 26, 29, 26, 22, 21, 23, 24, 25, 24, 24, 25, 26, 26, 26, 25, 25, 26, 26, 25, 24, 25, 25, 27, 26, 18, 29, 31, 97, 162, 117, 120, 120, 109, 108, 99, 92, 89, 78, 67, 51, 49, 63, 55, 58, 81, 71, 65, 115, 148, 165, 159, 163, 164, 168, 165, 168, 167, 169, 170, 169, 169, 171, 173, 170, 170, 170, 170, 171, 171, 171, 172, 172, 170, 170, 170, 170, 170, 167, 166, 164, 160, 158, 159, 161, 158, 159, 162, 163, 159, 156, 160, 163, 161, 157, 154, 152, 152, 151, 152, 152, 153, 155, 157, 160, 161, 165, 163, 162, 162, 165, 165, 164, 166, 167, 166, 165, 164, 167, 174, 178, 167, 157, 158, 159, 158, 161, 161, 161, 160, 156, 150, 149, 153, 155, 151, 144, 139, 149, 152, 154, 158, 159, 144, 148, 159, 151, 148, 143, 153, 171, 149, 153, 150, 163, 162, 156, 157, 163, 165, 164, 154, 153, 149, 148, 155, 157, 154, 153, 151, 153, 155, 156, 156, 153, 150, 148, 148, 151, 152, 153, 154, 157, 156, 153, 150, 150, 150, 151, 151, 152, 152, 151, 149, 147, 148, 150, 149, 146, 145, 146, 149, 150, 147, 147, 145, 142, 145, 146, 140, 129, 119, 118, 122, 122, 117, 115, 116, 118, 125, 121, 126, 121, 92, 60, 69, 73, 46, 51, 48, 89, 117, 112, 102, 87, 82, 101, 118, 123, 133, 138, 101, 43, 15, 22, 28, 16, 24, 25, 20, 18, 20, 24, 23, 23, 20, 20, 23, 25, 26, 26, 25, 24, 24, 24, 24, 24, 25, 26, 26, 27, 25, 24, 25, 27, 27, 28, 29, 28, 26, 30, 23, 21, 26, 54, 148, 127, 127, 115, 110, 109, 99, 91, 91, 79, 67, 54, 48, 61, 54, 62, 75, 70, 64, 122, 151, 166, 158, 164, 164, 167, 164, 167, 166, 168, 168, 167, 166, 168, 172, 169, 168, 168, 168, 167, 168, 168, 169, 169, 168, 168, 168, 168, 169, 167, 167, 165, 162, 160, 161, 163, 159, 157, 159, 162, 159, 157, 159, 163, 162, 158, 154, 152, 152, 153, 151, 151, 152, 154, 157, 158, 160, 162, 160, 159, 159, 162, 162, 161, 164, 167, 171, 170, 166, 162, 161, 155, 154, 156, 157, 151, 151, 160, 156, 152, 151, 148, 145, 143, 142, 144, 143, 148, 147, 138, 138, 150, 151, 144, 145, 154, 157, 152, 146, 150, 153, 154, 155, 156, 158, 160, 168, 169, 164, 159, 163, 165, 158, 154, 147, 142, 150, 154, 155, 156, 156, 156, 156, 158, 158, 155, 148, 147, 150, 153, 154, 153, 155, 159, 157, 154, 151, 152, 153, 154, 155, 153, 152, 150, 147, 146, 146, 150, 150, 148, 144, 146, 150, 151, 147, 144, 143, 141, 141, 139, 137, 135, 126, 121, 122, 118, 113, 112, 115, 117, 121, 117, 125, 120, 85, 64, 74, 72, 38, 45, 42, 95, 123, 105, 77, 78, 100, 120, 129, 144, 148, 112, 53, 14, 13, 23, 23, 21, 24, 25, 19, 17, 19, 20, 19, 20, 19, 20, 21, 24, 27, 27, 26, 25, 24, 24, 24, 24, 25, 26, 26, 27, 24, 24, 26, 27, 28, 30, 30, 31, 24, 32, 31, 15, 27, 23, 90, 143, 129, 112, 113, 114, 99, 94, 91, 80, 69, 52, 41, 55, 51, 58, 71, 66, 58, 121, 160, 165, 156, 162, 162, 165, 161, 165, 162, 163, 163, 163, 163, 163, 165, 163, 163, 163, 163, 163, 163, 163, 165, 164, 163, 163, 163, 164, 164, 164, 163, 160, 157, 156, 160, 164, 160, 154, 153, 157, 157, 155, 156, 161, 160, 156, 153, 151, 151, 152, 149, 149, 150, 152, 154, 157, 158, 159, 158, 156, 157, 159, 159, 159, 161, 164, 166, 164, 161, 159, 156, 159, 157, 154, 149, 144, 141, 141, 153, 155, 150, 146, 140, 127, 111, 89, 69, 102, 144, 147, 148, 149, 144, 141, 141, 142, 141, 143, 146, 153, 153, 151, 151, 154, 156, 156, 164, 161, 153, 149, 153, 159, 158, 153, 148, 146, 149, 152, 151, 150, 150, 151, 154, 157, 157, 155, 152, 151, 152, 154, 155, 155, 156, 158, 159, 157, 155, 155, 156, 157, 155, 153, 151, 151, 148, 146, 146, 148, 150, 148, 146, 146, 147, 147, 144, 139, 139, 140, 135, 131, 133, 141, 138, 129, 119, 111, 109, 111, 114, 113, 117, 115, 122, 118, 80, 61, 67, 67, 50, 56, 44, 82, 99, 93, 97, 115, 127, 132, 126, 111, 86, 55, 25, 11, 19, 27, 24, 21, 24, 25, 20, 19, 20, 20, 19, 20, 20, 20, 22, 24, 27, 27, 26, 25, 24, 24, 24, 24, 25, 26, 26, 27, 26, 26, 26, 26, 26, 26, 26, 25, 26, 25, 25, 25, 16, 22, 28, 142, 121, 119, 114, 118, 97, 97, 93, 83, 73, 52, 38, 51, 49, 54, 67, 63, 54, 118, 162, 165, 155, 161, 161, 165, 160, 163, 161, 160, 160, 160, 160, 160, 159, 158, 159, 159, 160, 160, 160, 159, 160, 160, 159, 158, 158, 159, 160, 158, 157, 154, 151, 152, 156, 160, 161, 154, 151, 155, 156, 154, 153, 159, 158, 154, 150, 149, 150, 151, 148, 148, 148, 150, 152, 154, 157, 159, 157, 155, 156, 158, 158, 158, 155, 158, 157, 153, 155, 158, 156, 147, 145, 137, 129, 128, 127, 121, 127, 133, 133, 125, 116, 102, 86, 64, 54, 103, 144, 132, 128, 129, 130, 137, 143, 144, 142, 142, 144, 148, 150, 152, 149, 147, 151, 156, 159, 158, 156, 153, 152, 150, 150, 149, 148, 149, 149, 150, 149, 146, 145, 147, 150, 153, 155, 155, 154, 154, 153, 153, 153, 155, 155, 155, 155, 155, 155, 155, 157, 155, 152, 149, 149, 150, 148, 146, 146, 147, 148, 146, 144, 143, 143, 141, 138, 137, 136, 136, 135, 132, 132, 134, 132, 124, 114, 108, 108, 110, 111, 110, 114, 114, 120, 113, 74, 59, 65, 57, 47, 48, 39, 82, 105, 112, 116, 113, 109, 121, 106, 48, 12, 16, 21, 21, 24, 29, 25, 21, 24, 26, 22, 20, 22, 21, 20, 21, 20, 21, 22, 25, 27, 28, 26, 25, 24, 24, 24, 24, 25, 26, 26, 27, 28, 27, 26, 25, 24, 23, 23, 22, 27, 22, 22, 28, 18, 29, 11, 104, 125, 125, 115, 116, 100, 101, 95, 88, 79, 55, 37, 50, 49, 51, 65, 63, 53, 114, 156, 166, 157, 163, 162, 166, 162, 165, 162, 160, 159, 160, 160, 158, 155, 152, 155, 156, 158, 158, 157, 156, 158, 157, 156, 155, 155, 155, 156, 154, 154, 153, 150, 150, 152, 156, 157, 153, 153, 155, 154, 150, 151, 156, 155, 151, 149, 148, 149, 150, 146, 146, 147, 148, 151, 153, 155, 156, 154, 153, 154, 156, 157, 156, 149, 155, 156, 151, 153, 151, 142, 145, 168, 180, 162, 146, 147, 150, 156, 160, 158, 154, 149, 131, 103, 85, 91, 126, 147, 141, 137, 128, 129, 134, 135, 135, 138, 141, 138, 139, 142, 147, 144, 140, 142, 147, 135, 133, 141, 146, 140, 137, 144, 155, 158, 154, 148, 147, 149, 149, 148, 151, 155, 154, 152, 150, 150, 152, 152, 150, 151, 152, 152, 150, 151, 152, 153, 154, 154, 151, 147, 144, 145, 146, 146, 146, 145, 146, 147, 146, 144, 141, 138, 136, 134, 135, 135, 134, 134, 134, 129, 123, 120, 117, 111, 108, 108, 109, 108, 109, 112, 112, 116, 109, 70, 59, 63, 48, 48, 51, 51, 95, 115, 106, 107, 128, 137, 102, 51, 19, 19, 16, 13, 10, 25, 31, 24, 23, 22, 23, 26, 23, 21, 23, 22, 20, 22, 21, 22, 22, 25, 28, 28, 26, 25, 24, 24, 24, 24, 25, 26, 26, 27, 27, 26, 27, 27, 26, 26, 27, 30, 26, 26, 28, 14, 38, 20, 35, 56, 143, 118, 118, 108, 108, 105, 99, 92, 85, 59, 39, 52, 51, 50, 64, 66, 55, 110, 146, 168, 158, 164, 164, 168, 164, 168, 164, 161, 160, 162, 162, 159, 154, 151, 152, 155, 157, 157, 156, 155, 156, 156, 154, 154, 154, 155, 156, 156, 156, 156, 153, 152, 153, 155, 151, 150, 153, 155, 150, 146, 148, 154, 152, 150, 147, 147, 148, 149, 145, 145, 145, 147, 149, 151, 152, 154, 152, 150, 151, 153, 154, 153, 152, 155, 150, 143, 146, 148, 141, 139, 162, 169, 147, 134, 140, 144, 137, 144, 149, 153, 164, 172, 167, 169, 185, 179, 157, 158, 168, 164, 163, 154, 133, 122, 128, 136, 135, 135, 136, 136, 135, 133, 132, 130, 137, 144, 151, 150, 139, 139, 154, 181, 183, 166, 144, 137, 141, 145, 144, 147, 151, 151, 148, 147, 149, 150, 149, 147, 147, 149, 149, 146, 148, 151, 152, 153, 154, 150, 144, 139, 140, 143, 144, 144, 145, 147, 147, 147, 145, 142, 137, 134, 133, 130, 130, 130, 131, 128, 122, 116, 116, 116, 111, 107, 106, 107, 109, 110, 112, 112, 113, 105, 66, 59, 65, 45, 47, 46, 52, 98, 118, 115, 112, 104, 81, 44, 17, 16, 21, 23, 21, 18, 23, 29, 26, 20, 22, 26, 24, 23, 24, 22, 21, 22, 21, 22, 23, 26, 28, 28, 26, 25, 24, 29, 25, 23, 27, 32, 31, 29, 27, 25, 25, 25, 26, 27, 30, 26, 24, 26, 30, 26, 28, 26, 21, 31, 103, 146, 118, 94, 128, 103, 99, 99, 87, 63, 41, 54, 60, 60, 65, 63, 63, 110, 139, 153, 160, 147, 161, 165, 163, 161, 163, 161, 162, 164, 164, 161, 158, 149, 149, 150, 153, 155, 155, 154, 152, 152, 153, 154, 155, 156, 157, 156, 157, 156, 155, 153, 152, 151, 147, 148, 149, 150, 149, 148, 148, 151, 150, 148, 149, 151, 150, 149, 145, 145, 147, 151, 153, 152, 150, 149, 149, 149, 149, 150, 150, 149, 144, 148, 147, 142, 142, 142, 136, 139, 159, 147, 97, 85, 83, 97, 88, 94, 97, 83, 76, 112, 114, 105, 122, 132, 130, 114, 103, 135, 158, 145, 123, 122, 132, 133, 137, 143, 141, 133, 125, 121, 125, 130, 148, 175, 196, 189, 167, 149, 154, 188, 176, 146, 140, 143, 145, 147, 154, 152, 144, 140, 141, 145, 147, 147, 145, 145, 147, 149, 150, 149, 148, 150, 149, 148, 151, 154, 152, 144, 148, 146, 136, 136, 140, 146, 149, 146, 143, 138, 133, 131, 129, 127, 125, 123, 123, 121, 121, 118, 115, 111, 111, 111, 108, 103, 108, 115, 106, 107, 114, 95, 56, 61, 55, 48, 30, 35, 47, 117, 126, 112, 85, 32, 9, 18, 22, 18, 17, 22, 27, 27, 26, 28, 29, 28, 26, 24, 23, 25, 23, 21, 21, 22, 23, 25, 24, 24, 22, 23, 24, 25, 27, 27, 23, 22, 26, 31, 31, 29, 27, 25, 25, 25, 25, 27, 30, 26, 25, 27, 30, 28, 25, 26, 19, 27, 79, 131, 130, 108, 110, 115, 106, 100, 92, 65, 38, 53, 56, 59, 64, 62, 60, 99, 121, 145, 161, 150, 163, 164, 163, 164, 166, 164, 164, 163, 162, 158, 155, 150, 149, 149, 152, 154, 154, 153, 153, 153, 153, 152, 152, 152, 152, 151, 151, 151, 151, 151, 152, 151, 150, 149, 150, 150, 148, 147, 145, 149, 148, 146, 148, 151, 151, 149, 151, 151, 151, 152, 151, 149, 145, 145, 145, 146, 148, 148, 149, 149, 148, 149, 145, 137, 138, 143, 144, 126, 129, 116, 105, 108, 96, 87, 78, 93, 115, 113, 93, 107, 98, 89, 78, 71, 89, 99, 101, 132, 151, 126, 112, 123, 127, 127, 129, 135, 136, 134, 128, 122, 120, 119, 118, 121, 124, 143, 165, 170, 169, 171, 175, 195, 217, 213, 179, 148, 140, 140, 139, 141, 143, 144, 142, 143, 142, 142, 144, 146, 147, 147, 146, 147, 147, 145, 147, 151, 148, 145, 149, 139, 126, 128, 130, 134, 138, 137, 134, 131, 129, 128, 128, 127, 124, 123, 122, 122, 121, 119, 116, 112, 111, 111, 107, 102, 105, 111, 102, 105, 112, 93, 60, 69, 57, 46, 30, 43, 52, 100, 99, 70, 46, 22, 15, 20, 23, 22, 20, 22, 26, 27, 27, 27, 29, 26, 21, 20, 20, 22, 22, 21, 20, 22, 23, 24, 24, 23, 22, 23, 24, 25, 27, 24, 21, 21, 24, 28, 29, 28, 27, 25, 25, 25, 26, 27, 30, 26, 25, 29, 31, 28, 24, 24, 23, 23, 45, 90, 126, 122, 95, 120, 106, 96, 96, 68, 36, 54, 52, 55, 61, 60, 58, 95, 115, 137, 156, 147, 158, 155, 154, 156, 158, 156, 155, 155, 156, 155, 153, 149, 148, 147, 150, 152, 152, 152, 151, 151, 151, 150, 150, 149, 149, 147, 147, 147, 148, 149, 150, 150, 150, 150, 150, 149, 148, 146, 144, 151, 149, 146, 145, 145, 144, 143, 145, 144, 143, 144, 144, 141, 138, 137, 137, 137, 137, 137, 137, 136, 135, 137, 135, 130, 126, 126, 126, 111, 136, 137, 121, 94, 80, 75, 115, 114, 107, 118, 115, 123, 113, 121, 113, 108, 112, 100, 99, 140, 150, 111, 111, 137, 135, 134, 132, 133, 135, 138, 138, 134, 128, 123, 131, 151, 161, 158, 156, 154, 162, 173, 166, 159, 163, 158, 144, 136, 138, 138, 135, 135, 136, 137, 138, 141, 140, 140, 142, 145, 145, 145, 144, 145, 145, 143, 145, 147, 143, 146, 150, 137, 124, 129, 131, 134, 136, 135, 133, 129, 127, 126, 124, 124, 123, 120, 121, 121, 120, 117, 114, 112, 111, 110, 106, 102, 101, 104, 100, 104, 104, 88, 63, 73, 54, 37, 28, 46, 50, 63, 52, 25, 18, 20, 23, 21, 22, 24, 24, 24, 25, 26, 25, 26, 28, 25, 20, 19, 19, 22, 23, 22, 21, 22, 23, 24, 24, 24, 25, 24, 24, 24, 25, 23, 22, 21, 23, 25, 26, 26, 27, 25, 25, 25, 26, 27, 30, 26, 25, 27, 31, 28, 25, 26, 26, 23, 20, 45, 95, 123, 110, 121, 109, 100, 100, 72, 38, 54, 53, 53, 56, 56, 59, 100, 122, 125, 140, 132, 147, 150, 149, 148, 152, 149, 147, 148, 149, 151, 151, 149, 147, 145, 147, 149, 150, 150, 150, 149, 149, 150, 150, 151, 151, 148, 148, 148, 148, 146, 146, 145, 147, 146, 147, 147, 146, 145, 145, 151, 151, 147, 144, 142, 143, 144, 140, 138, 136, 135, 135, 133, 131, 128, 128, 128, 129, 129, 128, 128, 125, 126, 128, 124, 118, 116, 120, 114, 129, 121, 113, 105, 101, 68, 76, 82, 81, 87, 73, 80, 94, 89, 61, 61, 94, 112, 116, 128, 113, 77, 97, 141, 147, 149, 147, 149, 150, 150, 146, 141, 134, 126, 126, 145, 155, 153, 150, 143, 141, 157, 161, 159, 145, 123, 117, 133, 139, 137, 136, 133, 132, 134, 137, 139, 139, 139, 140, 143, 144, 143, 142, 144, 144, 142, 144, 145, 141, 146, 152, 140, 129, 135, 136, 137, 136, 134, 133, 130, 127, 125, 122, 121, 119, 117, 117, 118, 116, 114, 113, 113, 111, 109, 106, 103, 100, 99, 100, 106, 98, 80, 62, 71, 46, 30, 28, 46, 52, 42, 33, 21, 23, 26, 24, 22, 22, 24, 25, 26, 24, 24, 25, 26, 26, 26, 25, 24, 24, 26, 26, 24, 22, 22, 22, 24, 24, 26, 27, 26, 24, 24, 23, 25, 24, 23, 23, 23, 23, 24, 27, 25, 25, 25, 26, 27, 30, 26, 23, 25, 28, 27, 26, 29, 26, 23, 20, 27, 53, 90, 116, 121, 120, 115, 106, 78, 46, 52, 53, 55, 58, 57, 55, 88, 103, 111, 128, 122, 139, 145, 149, 153, 156, 151, 147, 145, 147, 148, 149, 148, 145, 143, 144, 146, 147, 148, 148, 148, 148, 149, 148, 148, 148, 149, 149, 147, 145, 143, 142, 140, 140, 140, 140, 141, 141, 140, 139, 143, 143, 143, 143, 143, 146, 151, 148, 145, 141, 139, 137, 134, 131, 129, 129, 130, 130, 131, 131, 131, 130, 128, 125, 122, 118, 122, 135, 148, 152, 146, 117, 96, 108, 111, 98, 98, 86, 87, 77, 81, 92, 106, 81, 79, 110, 132, 138, 124, 100, 84, 102, 139, 147, 144, 142, 142, 141, 140, 141, 141, 139, 133, 132, 152, 164, 164, 169, 170, 170, 162, 135, 111, 112, 119, 119, 116, 121, 127, 133, 135, 133, 130, 128, 131, 131, 130, 133, 135, 136, 135, 133, 136, 138, 137, 139, 140, 136, 136, 143, 139, 129, 132, 129, 128, 126, 124, 125, 125, 124, 123, 122, 120, 117, 115, 115, 116, 115, 113, 111, 112, 112, 108, 108, 107, 101, 97, 103, 110, 95, 77, 62, 68, 43, 35, 38, 47, 58, 45, 51, 36, 30, 30, 24, 21, 24, 26, 28, 27, 24, 22, 24, 24, 24, 25, 26, 24, 24, 26, 26, 25, 22, 21, 22, 23, 24, 27, 29, 28, 24, 23, 21, 27, 26, 25, 24, 22, 21, 23, 27, 25, 25, 25, 25, 27, 30, 26, 22, 23, 26, 26, 28, 33, 25, 25, 30, 26, 17, 39, 86, 112, 120, 123, 106, 81, 53, 54, 51, 57, 64, 61, 48, 65, 68, 104, 126, 121, 133, 134, 139, 150, 151, 146, 142, 142, 145, 148, 149, 148, 145, 142, 142, 144, 147, 147, 148, 148, 147, 145, 144, 143, 143, 144, 145, 143, 142, 140, 139, 138, 136, 136, 135, 134, 133, 131, 130, 134, 136, 136, 135, 135, 139, 145, 149, 147, 143, 143, 142, 141, 139, 138, 137, 135, 132, 129, 127, 125, 124, 122, 122, 119, 111, 110, 120, 124, 116, 153, 166, 156, 148, 148, 126, 135, 122, 110, 89, 79, 81, 103, 86, 83, 98, 115, 129, 116, 95, 95, 106, 130, 144, 142, 143, 142, 140, 138, 138, 137, 132, 124, 125, 148, 163, 163, 166, 161, 155, 142, 121, 105, 108, 113, 115, 119, 123, 126, 128, 126, 121, 119, 120, 123, 122, 121, 124, 127, 127, 126, 124, 127, 129, 129, 132, 133, 129, 120, 128, 132, 128, 129, 126, 125, 125, 124, 124, 124, 122, 121, 119, 118, 117, 116, 116, 116, 115, 113, 111, 111, 112, 108, 110, 110, 103, 96, 104, 115, 97, 78, 66, 69, 46, 42, 46, 40, 51, 39, 55, 32, 19, 27, 24, 22, 27, 30, 30, 28, 23, 21, 23, 25, 23, 22, 20, 20, 21, 25, 25, 25, 22, 21, 21, 23, 24, 28, 31, 29, 24, 22, 20, 28, 27, 26, 24, 23, 22, 21, 22, 20, 20, 22, 25, 24, 22, 27, 28, 29, 29, 27, 28, 30, 27, 25, 28, 31, 27, 24, 28, 35, 41, 71, 93, 78, 48, 39, 42, 44, 57, 56, 69, 105, 118, 127, 143, 133, 126, 130, 128, 136, 135, 133, 132, 136, 143, 149, 151, 150, 147, 147, 147, 144, 141, 143, 147, 145, 141, 139, 140, 141, 143, 142, 140, 139, 142, 144, 142, 139, 134, 130, 129, 131, 135, 134, 133, 137, 136, 135, 133, 135, 137, 139, 137, 138, 142, 147, 148, 145, 141, 136, 133, 133, 135, 137, 136, 132, 133, 132, 130, 126, 123, 121, 119, 105, 102, 100, 100, 108, 115, 113, 113, 131, 137, 133, 139, 141, 140, 145, 141, 136, 137, 136, 120, 99, 97, 116, 113, 111, 130, 132, 131, 131, 130, 130, 130, 128, 121, 114, 112, 113, 103, 81, 71, 73, 72, 84, 101, 114, 112, 110, 111, 113, 111, 109, 108, 108, 109, 109, 108, 109, 111, 110, 103, 104, 110, 109, 102, 103, 111, 115, 115, 114, 112, 112, 113, 114, 116, 116, 116, 115, 114, 117, 120, 117, 113, 114, 120, 116, 106, 97, 97, 107, 114, 113, 111, 105, 101, 103, 101, 99, 102, 109, 109, 97, 110, 68, 84, 63, 46, 48, 53, 54, 53, 49, 39, 26, 22, 21, 22, 23, 24, 26, 25, 22, 20, 21, 23, 25, 25, 23, 21, 18, 19, 23, 25, 24, 23, 20, 16, 19, 25, 25, 18, 16, 18, 20, 22, 28, 28, 27, 26, 25, 24, 24, 24, 23, 23, 24, 25, 24, 22, 25, 27, 29, 28, 26, 27, 30, 31, 26, 26, 27, 24, 24, 28, 22, 17, 25, 44, 53, 44, 32, 37, 42, 58, 62, 70, 100, 119, 149, 146, 137, 129, 124, 124, 127, 127, 124, 124, 128, 135, 140, 142, 144, 141, 141, 142, 138, 133, 133, 136, 138, 141, 143, 142, 138, 136, 138, 137, 136, 136, 137, 139, 141, 138, 136, 134, 135, 137, 139, 138, 140, 139, 139, 138, 137, 136, 136, 139, 140, 143, 146, 149, 147, 144, 140, 137, 134, 135, 135, 132, 128, 131, 132, 132, 133, 132, 130, 129, 117, 108, 110, 112, 107, 104, 116, 108, 76, 70, 88, 93, 95, 103, 109, 113, 123, 139, 141, 123, 99, 99, 118, 119, 116, 127, 128, 127, 125, 124, 124, 124, 123, 121, 119, 118, 120, 112, 96, 89, 87, 79, 79, 93, 109, 114, 115, 116, 115, 114, 117, 121, 118, 110, 105, 104, 105, 106, 101, 95, 93, 95, 94, 88, 87, 91, 96, 100, 100, 98, 100, 103, 104, 106, 107, 107, 107, 111, 115, 116, 115, 112, 112, 113, 107, 100, 95, 97, 105, 108, 105, 103, 100, 98, 101, 101, 99, 102, 103, 103, 96, 104, 65, 78, 62, 46, 47, 54, 53, 48, 42, 34, 30, 28, 25, 23, 22, 23, 25, 25, 22, 21, 22, 24, 25, 24, 23, 21, 20, 21, 24, 25, 24, 23, 21, 19, 21, 24, 26, 24, 24, 24, 24, 24, 28, 27, 28, 28, 27, 27, 27, 27, 26, 25, 26, 27, 25, 22, 25, 26, 28, 27, 26, 27, 30, 30, 27, 25, 25, 24, 24, 25, 37, 29, 20, 29, 55, 64, 49, 39, 44, 61, 70, 71, 90, 114, 147, 129, 130, 126, 118, 122, 120, 121, 121, 121, 124, 129, 133, 134, 137, 135, 136, 136, 130, 122, 120, 130, 134, 138, 140, 138, 134, 130, 128, 128, 126, 124, 124, 129, 136, 135, 133, 132, 131, 134, 136, 137, 140, 141, 142, 142, 141, 139, 137, 133, 131, 130, 132, 133, 133, 131, 127, 126, 126, 126, 126, 125, 124, 129, 130, 129, 126, 122, 118, 114, 118, 114, 116, 120, 113, 112, 126, 122, 81, 96, 132, 124, 114, 112, 105, 105, 106, 99, 91, 93, 104, 120, 132, 130, 119, 116, 114, 113, 121, 125, 128, 129, 128, 127, 126, 128, 130, 127, 121, 117, 112, 99, 85, 90, 103, 115, 123, 127, 128, 124, 128, 133, 132, 128, 127, 129, 128, 124, 117, 108, 101, 97, 94, 90, 86, 82, 85, 91, 93, 90, 93, 95, 97, 101, 104, 106, 108, 108, 108, 108, 109, 111, 109, 107, 101, 97, 99, 105, 110, 110, 106, 103, 103, 104, 107, 108, 108, 108, 107, 109, 105, 102, 64, 70, 59, 48, 47, 49, 43, 32, 23, 17, 22, 25, 22, 19, 20, 23, 26, 25, 23, 22, 23, 25, 25, 23, 22, 21, 21, 23, 24, 25, 24, 23, 23, 24, 23, 21, 22, 26, 28, 26, 25, 22, 28, 28, 28, 28, 28, 28, 28, 28, 27, 27, 28, 28, 27, 24, 24, 25, 27, 27, 26, 27, 29, 27, 27, 26, 27, 27, 25, 20, 18, 25, 19, 23, 51, 71, 60, 46, 56, 65, 71, 70, 77, 98, 118, 110, 118, 121, 119, 125, 120, 125, 126, 126, 126, 128, 130, 132, 130, 127, 126, 126, 118, 110, 107, 107, 107, 107, 107, 105, 102, 100, 98, 98, 97, 95, 95, 99, 104, 103, 103, 103, 103, 104, 105, 107, 113, 116, 118, 120, 120, 118, 117, 113, 110, 111, 112, 115, 116, 115, 114, 115, 117, 118, 117, 118, 118, 115, 116, 117, 118, 118, 118, 117, 123, 123, 118, 110, 110, 111, 109, 100, 85, 108, 120, 110, 118, 122, 116, 114, 117, 115, 106, 102, 109, 121, 126, 131, 126, 116, 111, 106, 112, 119, 128, 132, 133, 132, 133, 134, 134, 136, 136, 137, 133, 125, 106, 97, 99, 109, 124, 133, 138, 137, 135, 130, 128, 128, 127, 127, 125, 121, 118, 117, 113, 110, 109, 103, 93, 83, 79, 82, 84, 82, 85, 87, 87, 89, 91, 92, 94, 95, 97, 98, 101, 104, 104, 102, 101, 103, 108, 112, 113, 109, 106, 103, 103, 104, 106, 107, 108, 107, 105, 109, 106, 94, 66, 65, 59, 49, 42, 39, 32, 22, 14, 12, 20, 24, 21, 19, 20, 23, 27, 26, 24, 23, 25, 26, 25, 23, 20, 20, 23, 24, 24, 24, 24, 24, 26, 26, 23, 18, 18, 21, 23, 22, 20, 18, 28, 28, 28, 28, 27, 26, 26, 26, 25, 25, 27, 29, 28, 26, 23, 25, 26, 26, 25, 27, 29, 27, 27, 26, 27, 31, 30, 22, 15, 29, 25, 21, 42, 61, 56, 53, 68, 67, 68, 71, 70, 82, 118, 129, 129, 124, 126, 128, 123, 127, 129, 129, 126, 124, 124, 126, 120, 115, 112, 109, 101, 93, 90, 84, 82, 79, 78, 77, 79, 81, 84, 84, 84, 84, 85, 84, 83, 81, 84, 87, 87, 86, 86, 88, 94, 96, 98, 99, 99, 98, 97, 99, 99, 100, 104, 108, 109, 109, 109, 112, 114, 114, 113, 113, 115, 114, 113, 110, 108, 108, 108, 108, 105, 99, 90, 86, 87, 87, 81, 80, 96, 115, 110, 106, 115, 114, 118, 111, 107, 111, 105, 95, 94, 105, 104, 116, 121, 115, 116, 112, 104, 108, 116, 120, 120, 123, 128, 128, 128, 130, 131, 133, 132, 133, 123, 107, 94, 99, 111, 121, 127, 125, 121, 119, 119, 119, 121, 123, 122, 119, 115, 116, 113, 108, 108, 106, 97, 85, 75, 72, 74, 77, 80, 81, 80, 79, 78, 79, 80, 85, 89, 92, 93, 94, 96, 99, 102, 106, 110, 110, 107, 103, 102, 100, 101, 101, 98, 97, 100, 99, 95, 101, 98, 80, 67, 62, 57, 50, 39, 28, 24, 22, 20, 23, 26, 26, 24, 22, 23, 25, 27, 26, 25, 24, 26, 27, 25, 22, 19, 20, 24, 25, 25, 23, 24, 25, 27, 27, 25, 21, 19, 19, 20, 20, 20, 20, 30, 29, 28, 26, 25, 25, 23, 24, 23, 24, 26, 28, 28, 27, 23, 24, 27, 26, 25, 27, 29, 30, 28, 24, 23, 31, 33, 27, 15, 24, 20, 17, 39, 61, 60, 57, 75, 66, 63, 70, 67, 71, 140, 166, 151, 132, 133, 128, 125, 126, 127, 127, 122, 117, 116, 117, 109, 103, 99, 94, 86, 78, 76, 86, 85, 84, 85, 87, 90, 93, 100, 101, 102, 104, 105, 100, 94, 92, 98, 103, 104, 102, 100, 101, 106, 108, 107, 107, 106, 104, 103, 101, 101, 101, 103, 104, 102, 98, 98, 102, 108, 110, 111, 113, 117, 118, 115, 109, 105, 104, 103, 105, 107, 90, 79, 80, 70, 59, 61, 77, 99, 98, 87, 93, 96, 91, 92, 97, 105, 105, 94, 95, 118, 122, 102, 98, 98, 96, 112, 118, 107, 106, 107, 105, 103, 108, 116, 118, 118, 119, 118, 118, 121, 128, 129, 109, 88, 89, 97, 103, 106, 102, 105, 110, 109, 105, 106, 111, 110, 105, 105, 110, 110, 106, 109, 110, 103, 91, 78, 72, 75, 82, 85, 85, 85, 86, 87, 90, 92, 88, 88, 92, 90, 86, 88, 95, 97, 100, 105, 106, 104, 104, 109, 107, 107, 105, 97, 96, 99, 97, 94, 100, 94, 73, 67, 59, 53, 52, 41, 23, 19, 21, 23, 27, 23, 18, 19, 21, 23, 26, 29, 27, 25, 25, 27, 28, 26, 22, 18, 20, 25, 27, 25, 24, 25, 26, 27, 28, 28, 27, 25, 23, 21, 21, 23, 26, 26, 28, 27, 25, 25, 28, 33, 31, 28, 25, 26, 27, 26, 23, 24, 25, 26, 26, 25, 25, 25, 25, 27, 29, 27, 24, 23, 23, 19, 16, 38, 56, 57, 61, 67, 65, 63, 59, 58, 67, 77, 78, 105, 112, 114, 114, 119, 122, 118, 123, 119, 114, 114, 113, 109, 104, 91, 93, 92, 90, 90, 97, 105, 111, 112, 111, 109, 108, 112, 117, 121, 117, 116, 117, 120, 121, 120, 120, 119, 118, 119, 119, 117, 115, 112, 112, 112, 112, 110, 108, 107, 99, 101, 105, 106, 104, 104, 105, 106, 102, 95, 96, 101, 103, 103, 100, 100, 100, 100, 100, 99, 98, 96, 96, 95, 91, 78, 57, 36, 41, 56, 73, 75, 69, 66, 70, 91, 88, 75, 68, 71, 78, 85, 90, 89, 85, 88, 90, 88, 81, 80, 80, 80, 82, 83, 83, 83, 85, 85, 85, 85, 89, 93, 97, 100, 97, 91, 87, 85, 83, 79, 79, 86, 92, 90, 93, 95, 92, 97, 101, 105, 104, 101, 101, 102, 100, 99, 100, 100, 97, 92, 89, 94, 96, 92, 87, 85, 87, 92, 91, 91, 92, 91, 89, 88, 87, 91, 96, 102, 106, 107, 109, 111, 108, 103, 94, 88, 94, 100, 94, 80, 79, 75, 56, 73, 65, 65, 53, 32, 16, 17, 23, 19, 14, 18, 21, 20, 20, 21, 24, 26, 29, 29, 25, 24, 24, 25, 23, 23, 24, 24, 22, 20, 21, 25, 29, 26, 21, 22, 27, 31, 30, 27, 25, 25, 25, 28, 28, 26, 23, 21, 23, 25, 25, 23, 23, 25, 28, 28, 26, 25, 26, 26, 26, 26, 26, 26, 26, 28, 27, 27, 26, 27, 28, 25, 25, 50, 69, 68, 68, 70, 66, 58, 59, 63, 62, 67, 80, 86, 81, 90, 105, 111, 113, 120, 109, 111, 109, 104, 97, 97, 100, 97, 97, 102, 109, 113, 109, 102, 96, 88, 83, 89, 95, 95, 90, 96, 98, 102, 105, 109, 113, 115, 107, 106, 107, 110, 112, 112, 111, 107, 109, 112, 113, 111, 107, 103, 97, 96, 99, 104, 108, 107, 103, 101, 101, 99, 95, 91, 89, 88, 80, 80, 82, 84, 86, 87, 88, 90, 86, 83, 87, 86, 74, 58, 44, 45, 57, 75, 87, 81, 67, 74, 83, 86, 79, 70, 70, 78, 86, 88, 89, 88, 82, 72, 64, 61, 67, 76, 78, 77, 77, 80, 79, 78, 82, 84, 85, 87, 88, 83, 84, 86, 87, 84, 80, 77, 83, 88, 86, 84, 87, 88, 85, 85, 89, 92, 91, 87, 81, 78, 79, 82, 85, 91, 93, 93, 93, 88, 87, 86, 83, 81, 82, 84, 86, 87, 88, 87, 87, 89, 91, 91, 94, 98, 103, 104, 106, 109, 107, 94, 82, 82, 85, 87, 96, 85, 60, 59, 72, 53, 46, 39, 31, 22, 16, 22, 23, 17, 16, 21, 24, 25, 27, 26, 24, 23, 22, 25, 28, 28, 23, 21, 21, 20, 19, 21, 20, 22, 25, 30, 31, 28, 23, 23, 26, 27, 26, 26, 27, 27, 27, 29, 27, 25, 23, 22, 22, 23, 22, 22, 24, 26, 27, 28, 28, 26, 27, 27, 27, 28, 27, 27, 30, 29, 27, 24, 21, 22, 25, 20, 22, 51, 71, 67, 62, 60, 62, 58, 60, 63, 63, 67, 77, 85, 77, 81, 98, 106, 100, 93, 104, 91, 83, 90, 101, 100, 91, 91, 81, 71, 65, 62, 58, 53, 54, 60, 68, 72, 72, 73, 74, 60, 64, 69, 69, 69, 70, 73, 72, 73, 73, 76, 78, 78, 77, 79, 79, 79, 83, 89, 96, 101, 100, 100, 99, 100, 99, 94, 88, 88, 89, 92, 91, 91, 91, 91, 87, 86, 84, 80, 76, 72, 69, 75, 74, 75, 82, 90, 90, 84, 58, 46, 45, 57, 73, 78, 72, 82, 79, 72, 74, 83, 88, 90, 80, 82, 87, 85, 76, 67, 63, 60, 65, 71, 71, 67, 65, 67, 73, 75, 76, 75, 75, 74, 73, 70, 70, 72, 75, 75, 73, 69, 66, 61, 59, 63, 71, 77, 77, 72, 70, 67, 63, 61, 59, 59, 62, 64, 66, 70, 71, 70, 69, 67, 69, 73, 75, 76, 77, 79, 81, 83, 83, 81, 78, 80, 84, 87, 90, 93, 95, 95, 95, 96, 97, 96, 94, 89, 77, 72, 83, 82, 74, 71, 79, 36, 25, 16, 20, 18, 15, 22, 23, 19, 18, 23, 25, 26, 27, 26, 25, 24, 23, 24, 28, 29, 28, 26, 28, 26, 24, 24, 23, 23, 24, 26, 28, 26, 22, 22, 24, 25, 24, 24, 26, 26, 25, 28, 27, 26, 26, 27, 27, 27, 26, 28, 30, 30, 28, 27, 27, 26, 28, 29, 29, 29, 29, 29, 29, 29, 29, 26, 24, 26, 28, 13, 18, 50, 72, 66, 58, 53, 46, 47, 45, 44, 54, 60, 55, 75, 85, 83, 72, 71, 78, 81, 74, 81, 81, 72, 60, 58, 63, 58, 65, 70, 70, 66, 65, 67, 66, 70, 74, 76, 74, 72, 71, 66, 68, 70, 68, 65, 63, 64, 60, 60, 59, 61, 62, 61, 59, 71, 74, 75, 76, 75, 73, 72, 65, 69, 75, 76, 75, 76, 79, 83, 76, 71, 70, 74, 74, 70, 65, 64, 67, 70, 72, 73, 73, 79, 78, 72, 64, 53, 45, 40, 40, 42, 45, 45, 49, 60, 72, 78, 73, 65, 63, 65, 67, 67, 72, 76, 77, 69, 60, 53, 52, 61, 63, 62, 64, 66, 67, 66, 65, 65, 64, 63, 64, 65, 66, 68, 64, 60, 62, 67, 68, 65, 65, 60, 55, 57, 59, 57, 54, 55, 58, 63, 68, 67, 60, 52, 53, 55, 57, 57, 58, 58, 57, 55, 57, 61, 64, 64, 64, 65, 66, 69, 71, 70, 67, 69, 76, 83, 88, 91, 92, 93, 94, 95, 95, 97, 94, 88, 89, 84, 67, 64, 89, 80, 54, 27, 16, 15, 28, 21, 13, 21, 27, 24, 21, 23, 25, 24, 23, 23, 25, 27, 30, 30, 25, 24, 26, 27, 26, 24, 22, 22, 21, 22, 23, 22, 22, 22, 22, 23, 23, 24, 24, 23, 21, 21, 22, 28, 27, 26, 28, 30, 29, 27, 26, 31, 33, 31, 29, 28, 28, 28, 29, 30, 31, 31, 30, 30, 27, 29, 30, 30, 29, 30, 31, 13, 10, 17, 50, 73, 67, 58, 51, 37, 38, 35, 35, 38, 40, 37, 61, 81, 91, 81, 67, 58, 57, 53, 42, 36, 49, 71, 84, 86, 85, 65, 49, 58, 83, 105, 115, 123, 135, 145, 141, 129, 121, 121, 115, 111, 107, 104, 101, 98, 96, 91, 90, 86, 84, 80, 74, 69, 65, 63, 59, 56, 56, 59, 62, 57, 61, 68, 75, 82, 89, 94, 91, 88, 88, 90, 96, 98, 96, 92, 92, 96, 99, 101, 103, 104, 108, 108, 107, 104, 97, 92, 88, 90, 86, 83, 94, 108, 112, 106, 94, 98, 102, 92, 81, 79, 85, 82, 80, 79, 74, 68, 64, 62, 62, 61, 61, 60, 59, 57, 56, 53, 52, 52, 52, 52, 52, 52, 51, 50, 50, 49, 50, 53, 58, 58, 55, 58, 64, 64, 59, 57, 61, 58, 53, 50, 50, 50, 50, 56, 59, 57, 57, 54, 52, 51, 52, 55, 59, 59, 57, 56, 56, 58, 64, 70, 71, 68, 71, 78, 86, 90, 92, 93, 92, 93, 94, 92, 88, 83, 82, 86, 83, 69, 67, 72, 56, 27, 23, 18, 23, 25, 18, 14, 24, 29, 23, 22, 26, 27, 26, 25, 25, 26, 26, 29, 29, 26, 24, 25, 25, 23, 20, 18, 18, 19, 23, 25, 24, 22, 22, 23, 23, 22, 21, 22, 21, 21, 21, 21, 29, 26, 26, 27, 29, 27, 25, 24, 28, 31, 31, 29, 29, 29, 29, 29, 30, 31, 31, 30, 30, 28, 29, 30, 29, 26, 24, 24, 7, 12, 45, 69, 64, 55, 49, 48, 41, 41, 43, 36, 31, 38, 32, 30, 49, 84, 106, 113, 116, 112, 123, 125, 107, 82, 70, 71, 84, 116, 147, 153, 137, 119, 115, 100, 82, 65, 62, 70, 78, 81, 98, 98, 98, 104, 112, 117, 119, 116, 116, 116, 118, 119, 117, 115, 109, 111, 117, 120, 117, 110, 105, 92, 84, 78, 74, 72, 67, 61, 61, 65, 69, 69, 69, 68, 69, 64, 63, 64, 65, 65, 66, 65, 71, 70, 69, 71, 72, 68, 62, 61, 72, 83, 80, 73, 78, 90, 92, 94, 95, 93, 91, 95, 103, 113, 115, 112, 106, 99, 91, 85, 100, 112, 120, 123, 121, 121, 124, 127, 129, 129, 129, 125, 120, 116, 110, 116, 123, 120, 115, 117, 127, 121, 116, 116, 116, 106, 92, 85, 95, 98, 98, 98, 97, 92, 86, 78, 73, 69, 63, 55, 46, 40, 52, 60, 61, 61, 60, 59, 61, 65, 71, 80, 81, 77, 76, 80, 90, 94, 94, 89, 84, 81, 79, 80, 79, 81, 79, 65, 62, 80, 89, 51, 29, 19, 21, 21, 25, 15, 14, 19, 29, 29, 22, 23, 27, 29, 30, 30, 29, 25, 23, 22, 23, 28, 30, 28, 28, 30, 27, 23, 22, 23, 26, 27, 24, 23, 24, 24, 23, 21, 19, 19, 21, 23, 23, 23, 25, 25, 26, 26, 27, 27, 27, 27, 27, 27, 27, 27, 27, 27, 25, 26, 26, 27, 27, 26, 25, 31, 23, 25, 30, 25, 22, 28, 22, 15, 43, 71, 69, 63, 64, 66, 60, 55, 53, 50, 45, 38, 42, 37, 38, 45, 52, 59, 67, 70, 63, 65, 65, 65, 80, 93, 89, 85, 71, 65, 61, 52, 57, 51, 45, 43, 45, 46, 47, 49, 50, 52, 53, 57, 63, 67, 71, 70, 73, 78, 83, 86, 87, 86, 90, 90, 91, 95, 101, 106, 107, 107, 109, 113, 115, 116, 114, 112, 116, 114, 111, 106, 103, 101, 101, 101, 100, 98, 97, 96, 96, 97, 94, 92, 91, 91, 93, 93, 91, 96, 89, 76, 71, 72, 74, 74, 75, 74, 74, 74, 74, 72, 71, 70, 72, 75, 77, 76, 72, 69, 69, 72, 76, 76, 74, 73, 74, 75, 76, 77, 79, 81, 83, 84, 81, 80, 81, 78, 75, 74, 74, 75, 76, 75, 78, 80, 79, 77, 82, 85, 86, 86, 88, 89, 89, 88, 88, 92, 94, 94, 92, 90, 92, 92, 89, 85, 81, 78, 76, 67, 63, 70, 81, 81, 74, 72, 77, 76, 66, 62, 63, 66, 67, 69, 64, 63, 75, 80, 76, 78, 62, 30, 14, 18, 20, 22, 24, 22, 20, 21, 26, 27, 24, 24, 27, 29, 28, 25, 23, 22, 24, 26, 26, 24, 23, 25, 26, 26, 26, 26, 24, 22, 21, 21, 22, 26, 28, 25, 24, 25, 26, 25, 25, 25, 24, 22, 28, 28, 29, 29, 28, 28, 28, 28, 28, 28, 27, 27, 27, 27, 24, 25, 26, 27, 27, 26, 26, 30, 24, 27, 31, 29, 26, 32, 18, 17, 46, 72, 70, 62, 58, 63, 65, 66, 64, 59, 57, 56, 58, 53, 50, 50, 46, 43, 45, 53, 43, 50, 56, 50, 43, 31, 44, 42, 35, 39, 42, 38, 42, 45, 40, 40, 45, 47, 48, 51, 48, 48, 48, 48, 49, 51, 53, 47, 46, 46, 45, 43, 40, 38, 50, 49, 45, 44, 44, 43, 42, 50, 52, 54, 54, 52, 50, 47, 58, 60, 61, 60, 58, 55, 53, 49, 47, 45, 42, 39, 37, 37, 35, 32, 29, 28, 27, 25, 23, 28, 25, 18, 16, 18, 20, 19, 22, 22, 22, 21, 20, 20, 19, 19, 22, 24, 25, 25, 23, 21, 14, 15, 19, 21, 22, 24, 26, 27, 26, 25, 22, 19, 17, 16, 16, 17, 18, 16, 14, 14, 16, 11, 11, 14, 13, 11, 14, 20, 25, 24, 22, 21, 21, 23, 26, 31, 32, 29, 26, 23, 23, 24, 30, 33, 37, 41, 47, 55, 60, 72, 81, 89, 100, 108, 110, 113, 111, 112, 118, 113, 104, 107, 117, 127, 130, 127, 110, 74, 40, 27, 32, 20, 14, 22, 23, 24, 23, 20, 19, 20, 25, 25, 22, 23, 26, 28, 27, 25, 23, 21, 24, 26, 26, 23, 22, 23, 24, 24, 23, 23, 21, 19, 19, 20, 21, 25, 27, 26, 27, 28, 27, 25, 23, 24, 24, 25, 32, 32, 31, 31, 30, 29, 29, 29, 28, 28, 28, 27, 27, 27, 25, 26, 27, 29, 28, 28, 28, 29, 25, 28, 31, 30, 30, 34, 21, 23, 48, 68, 69, 69, 67, 57, 58, 59, 59, 59, 59, 60, 61, 57, 56, 56, 53, 53, 58, 56, 51, 58, 58, 51, 54, 56, 49, 52, 50, 51, 50, 45, 53, 48, 43, 43, 46, 47, 47, 49, 50, 49, 47, 44, 42, 41, 40, 46, 47, 48, 48, 49, 49, 49, 54, 51, 48, 47, 48, 49, 48, 47, 48, 51, 53, 54, 54, 54, 47, 46, 44, 42, 40, 39, 38, 34, 32, 30, 28, 26, 25, 24, 21, 20, 18, 20, 21, 21, 20, 22, 21, 19, 19, 20, 20, 18, 23, 26, 25, 23, 21, 21, 23, 21, 21, 23, 24, 25, 25, 24, 27, 28, 26, 23, 19, 16, 14, 13, 14, 16, 19, 21, 25, 26, 26, 26, 26, 24, 20, 18, 19, 21, 21, 21, 20, 18, 17, 18, 23, 24, 23, 22, 22, 23, 24, 25, 24, 23, 22, 23, 26, 29, 25, 22, 19, 16, 16, 18, 21, 24, 27, 33, 42, 52, 60, 66, 70, 72, 81, 96, 111, 111, 101, 88, 68, 45, 34, 28, 21, 16, 29, 26, 19, 22, 19, 23, 25, 22, 18, 19, 24, 24, 20, 20, 24, 27, 27, 25, 22, 21, 24, 27, 26, 23, 22, 22, 23, 22, 21, 21, 20, 19, 20, 22, 24, 25, 25, 24, 26, 28, 27, 24, 22, 23, 25, 27, 32, 32, 32, 31, 31, 31, 31, 29, 29, 29, 28, 27, 26, 26, 25, 26, 27, 29, 29, 29, 29, 29, 28, 28, 29, 29, 29, 30, 15, 15, 30, 43, 52, 66, 71, 67, 63, 60, 59, 60, 59, 57, 57, 54, 53, 52, 49, 52, 60, 65, 49, 48, 50, 49, 52, 50, 57, 59, 54, 56, 56, 49, 53, 55, 50, 49, 52, 51, 48, 49, 50, 51, 52, 54, 55, 55, 56, 55, 54, 52, 49, 46, 44, 43, 54, 52, 47, 45, 44, 43, 42, 38, 38, 37, 36, 34, 32, 31, 31, 30, 26, 23, 22, 23, 25, 24, 23, 23, 22, 21, 22, 22, 22, 20, 19, 22, 24, 25, 24, 23, 23, 24, 24, 23, 21, 19, 24, 26, 26, 23, 20, 21, 24, 27, 27, 26, 25, 24, 24, 24, 22, 20, 18, 18, 19, 18, 18, 17, 16, 17, 18, 18, 20, 20, 20, 22, 23, 22, 19, 19, 20, 19, 16, 16, 20, 23, 21, 17, 18, 20, 21, 20, 19, 17, 16, 16, 18, 19, 20, 21, 22, 23, 19, 18, 20, 21, 18, 14, 13, 10, 18, 24, 22, 20, 21, 26, 27, 23, 20, 21, 25, 30, 31, 31, 27, 24, 23, 26, 26, 22, 18, 18, 14, 17, 23, 20, 24, 25, 21, 19, 19, 24, 23, 20, 20, 23, 26, 25, 24, 22, 22, 25, 27, 25, 23, 22, 23, 23, 23, 23, 23, 22, 22, 22, 24, 26, 25, 22, 22, 24, 26, 25, 23, 22, 23, 24, 26, 31, 31, 31, 31, 32, 32, 32, 30, 30, 29, 27, 27, 26, 26, 25, 25, 27, 28, 30, 29, 29, 29, 30, 27, 26, 25, 24, 23, 18, 14, 17, 17, 25, 46, 55, 54, 58, 60, 59, 57, 54, 53, 50, 49, 50, 47, 42, 42, 49, 54, 42, 47, 56, 60, 62, 55, 47, 57, 58, 55, 50, 48, 64, 59, 54, 55, 60, 61, 60, 61, 61, 60, 56, 51, 45, 39, 35, 34, 35, 38, 39, 38, 36, 34, 33, 29, 27, 27, 28, 30, 29, 27, 26, 24, 22, 19, 17, 16, 14, 13, 14, 16, 20, 24, 25, 22, 20, 20, 19, 19, 19, 20, 21, 20, 19, 22, 24, 25, 24, 21, 21, 23, 24, 22, 20, 20, 25, 28, 28, 24, 20, 21, 26, 20, 18, 18, 19, 21, 23, 26, 19, 14, 13, 16, 21, 24, 24, 24, 24, 22, 19, 16, 14, 13, 16, 18, 20, 19, 18, 17, 19, 22, 22, 22, 22, 22, 20, 18, 16, 17, 20, 24, 30, 34, 37, 35, 33, 30, 26, 23, 20, 19, 16, 13, 12, 11, 16, 23, 30, 23, 20, 19, 13, 14, 19, 19, 18, 25, 33, 29, 17, 13, 10, 13, 10, 19, 28, 31, 24, 14, 12, 16, 21, 21, 28, 30, 22, 22, 21, 20, 20, 21, 25, 24, 20, 20, 23, 25, 25, 23, 22, 22, 25, 27, 26, 23, 23, 25, 26, 25, 25, 25, 24, 23, 23, 24, 26, 26, 23, 22, 22, 24, 26, 25, 25, 24, 24, 23, 28, 28, 29, 29, 30, 30, 30, 29, 29, 29, 28, 27, 26, 26, 25, 26, 27, 28, 28, 29, 29, 30, 30, 29, 27, 27, 26, 24, 28, 24, 20, 14, 16, 29, 34, 33, 38, 42, 37, 29, 26, 23, 22, 25, 29, 28, 25, 25, 29, 23, 22, 30, 32, 30, 35, 40, 45, 42, 37, 45, 53, 51, 51, 53, 50, 48, 47, 43, 38, 37, 34, 34, 34, 32, 30, 28, 28, 28, 27, 26, 23, 19, 14, 13, 10, 22, 21, 19, 18, 19, 19, 19, 17, 18, 19, 20, 21, 22, 23, 24, 24, 23, 23, 23, 22, 21, 22, 23, 21, 21, 21, 21, 21, 21, 20, 22, 24, 27, 28, 27, 23, 24, 26, 26, 25, 25, 25, 25, 26, 27, 25, 21, 22, 25, 27, 27, 26, 25, 24, 24, 24, 26, 24, 21, 20, 22, 21, 20, 20, 20, 21, 21, 21, 22, 22, 24, 26, 28, 27, 24, 23, 23, 21, 21, 23, 21, 20, 21, 24, 30, 30, 27, 23, 19, 18, 19, 19, 19, 19, 21, 23, 26, 28, 24, 22, 23, 24, 23, 18, 14, 20, 26, 25, 21, 22, 25, 23, 25, 26, 25, 26, 27, 26, 25, 24, 23, 20, 19, 21, 23, 21, 23, 24, 25, 23, 18, 22, 25, 23, 21, 21, 25, 25, 22, 21, 23, 25, 25, 24, 23, 23, 25, 26, 25, 25, 24, 26, 26, 25, 24, 24, 22, 22, 22, 25, 26, 26, 25, 23, 23, 24, 26, 26, 26, 26, 24, 23, 27, 27, 27, 28, 29, 28, 25, 25, 27, 29, 28, 26, 26, 27, 28, 28, 27, 27, 27, 27, 27, 28, 29, 30, 31, 32, 32, 31, 25, 24, 22, 21, 22, 23, 24, 24, 22, 25, 21, 20, 25, 19, 17, 21, 22, 19, 20, 22, 22, 21, 19, 17, 18, 20, 21, 21, 21, 22, 22, 23, 23, 23, 24, 24, 25, 27, 25, 22, 20, 19, 19, 19, 18, 16, 16, 18, 21, 23, 22, 21, 21, 21, 21, 21, 21, 21, 20, 19, 19, 19, 19, 19, 21, 21, 21, 21, 22, 23, 19, 18, 18, 18, 19, 20, 21, 23, 22, 22, 23, 22, 21, 19, 24, 25, 26, 29, 30, 28, 25, 26, 27, 27, 25, 23, 23, 25, 22, 23, 23, 24, 23, 23, 22, 22, 22, 24, 25, 25, 23, 22, 20, 18, 17, 17, 20, 21, 20, 20, 20, 20, 19, 19, 18, 18, 20, 22, 25, 25, 23, 21, 21, 22, 22, 22, 21, 20, 21, 22, 22, 24, 24, 22, 20, 20, 22, 20, 19, 20, 22, 24, 24, 24, 23, 22, 21, 23, 25, 26, 25, 26, 25, 25, 26, 27, 27, 25, 23, 23, 26, 25, 24, 23, 24, 27, 27, 23, 22, 23, 24, 22, 23, 24, 24, 24, 24, 22, 21, 21, 21, 22, 23, 25, 24, 22, 24, 26, 26, 26, 26, 25, 25, 25, 25, 26, 25, 23, 23, 23, 24, 24, 20, 21, 25, 27, 26, 25, 25, 25, 25, 25, 25, 25, 25, 26, 26, 26, 28, 28, 27, 29, 30, 28, 26, 25, 27, 29, 28, 26, 26, 27, 27, 27, 27, 27, 27, 27, 27, 28, 27, 28, 28, 27, 26, 26, 28, 28, 28, 29, 29, 29, 29, 25, 23, 25, 22, 21, 25, 18, 24, 28, 29, 26, 27, 29, 28, 26, 23, 21, 20, 22, 23, 22, 20, 20, 19, 17, 16, 15, 15, 14, 16, 19, 19, 19, 20, 21, 19, 19, 19, 17, 16, 17, 20, 23, 23, 22, 21, 21, 21, 21, 20, 20, 20, 19, 19, 18, 18, 21, 22, 22, 22, 22, 23, 23, 19, 18, 18, 18, 18, 19, 20, 21, 22, 22, 22, 20, 19, 19, 23, 23, 24, 26, 28, 27, 24, 24, 25, 26, 25, 23, 23, 24, 25, 25, 25, 25, 23, 22, 21, 20, 21, 23, 24, 23, 22, 20, 20, 19, 17, 18, 20, 21, 20, 20, 20, 20, 19, 19, 18, 18, 18, 19, 23, 22, 20, 19, 18, 18, 18, 18, 19, 20, 22, 23, 21, 21, 22, 20, 18, 19, 21, 18, 18, 19, 21, 22, 23, 23, 23, 23, 22, 24, 27, 28, 28, 29, 28, 27, 29, 30, 30, 28, 24, 25, 26, 26, 23, 22, 22, 27, 27, 23, 22, 23, 25, 24, 23, 24, 24, 24, 24, 23, 22, 22, 21, 21, 22, 25, 25, 23, 24, 26, 26, 26, 26, 25, 25, 25, 26, 25, 21, 18, 19, 24, 28, 28, 25, 25, 26, 26, 25, 25, 25, 25, 25, 25, 25, 25, 25, 26, 26, 26, 26, 25, 25, 26, 27, 26, 24, 25, 27, 29, 28, 26, 26, 27, 28, 28, 28, 28, 27, 27, 26, 27, 27, 28, 28, 27, 25, 24, 26, 27, 29, 30, 30, 30, 30, 29, 27, 29, 25, 23, 27, 21, 27, 31, 31, 28, 29, 31, 30, 28, 26, 22, 22, 22, 22, 21, 21, 21, 20, 19, 18, 18, 18, 17, 19, 20, 21, 20, 21, 23, 24, 25, 25, 22, 21, 22, 23, 24, 23, 22, 21, 21, 21, 22, 23, 23, 23, 22, 22, 20, 19, 20, 20, 19, 20, 22, 22, 21, 19, 18, 18, 17, 17, 18, 18, 20, 22, 23, 21, 19, 19, 19, 22, 22, 22, 24, 26, 25, 23, 22, 24, 26, 26, 24, 23, 25, 24, 24, 23, 23, 21, 20, 18, 18, 19, 21, 22, 22, 21, 19, 21, 20, 18, 19, 21, 22, 21, 21, 20, 20, 19, 19, 18, 18, 17, 18, 21, 20, 19, 17, 17, 19, 19, 18, 17, 18, 18, 19, 19, 18, 18, 18, 18, 19, 20, 18, 18, 19, 21, 21, 21, 21, 22, 22, 21, 24, 26, 28, 28, 30, 30, 29, 30, 32, 30, 27, 25, 25, 27, 26, 23, 22, 22, 26, 27, 23, 22, 24, 25, 25, 23, 24, 24, 25, 25, 24, 23, 22, 20, 20, 20, 24, 24, 23, 24, 25, 25, 25, 25, 24, 24, 23, 24, 26, 22, 19, 18, 22, 25, 25, 25, 25, 25, 25, 25, 25, 25, 25, 25, 25, 25, 25, 25, 26, 26, 26, 28, 27, 27, 28, 29, 28, 26, 25, 27, 29, 28, 26, 26, 27, 28, 28, 27, 27, 27, 27, 26, 28, 28, 29, 28, 27, 26, 25, 24, 24, 25, 26, 27, 28, 29, 32, 29, 32, 28, 26, 30, 24, 27, 31, 31, 27, 27, 29, 28, 29, 25, 23, 22, 22, 23, 22, 23, 23, 24, 24, 24, 25, 25, 22, 23, 23, 21, 20, 20, 22, 24, 26, 26, 24, 22, 21, 22, 23, 23, 22, 21, 20, 21, 21, 23, 25, 26, 26, 26, 24, 22, 20, 17, 16, 19, 22, 22, 20, 20, 19, 19, 18, 17, 18, 18, 19, 21, 24, 22, 18, 18, 20, 22, 21, 20, 22, 23, 23, 22, 21, 23, 26, 26, 25, 24, 25, 21, 20, 21, 20, 20, 18, 17, 18, 19, 21, 22, 21, 20, 18, 21, 20, 18, 19, 21, 22, 21, 20, 20, 20, 19, 19, 18, 18, 17, 19, 22, 21, 19, 18, 18, 21, 21, 19, 17, 15, 14, 14, 16, 16, 15, 16, 18, 20, 20, 18, 18, 19, 20, 20, 20, 20, 20, 19, 19, 22, 26, 28, 28, 28, 28, 28, 28, 29, 28, 26, 25, 26, 28, 26, 23, 21, 21, 25, 26, 23, 23, 24, 26, 25, 24, 24, 24, 25, 26, 25, 25, 22, 19, 18, 19, 22, 24, 24, 24, 24, 24, 24, 24, 23, 23, 22, 22, 25, 25, 25, 22, 19, 18, 19, 22, 23, 24, 24, 26, 26, 25, 25, 25, 25, 25, 25, 25, 26, 26, 26, 20, 20, 21, 21, 20, 19, 19, 20, 20, 20, 20, 19, 18, 17, 17, 18, 18, 19, 18, 18, 17, 18, 19, 19, 17, 17, 20, 23, 21, 21, 20, 19, 18, 17, 16, 15, 16, 19, 21, 22, 23, 22, 18, 18, 18, 18, 18, 19, 19, 22, 21, 21, 22, 22, 23, 24, 22, 21, 20, 20, 19, 20, 21, 19, 19, 18, 16, 15, 15, 15, 17, 17, 17, 17, 17, 17, 17, 16, 16, 16, 17, 17, 18, 18, 25, 26, 26, 24, 23, 22, 21, 21, 20, 19, 19, 18, 18, 18, 20, 20, 19, 19, 18, 17, 17, 17, 16, 13, 11, 12, 13, 10, 9, 12, 14, 17, 17, 17, 18, 20, 27, 21, 21, 20, 16, 15, 7, 6, 18, 19, 8, 12, 21, 19, 18, 19, 19, 20, 21, 22, 22, 12, 9, 9, 13, 10, 11, 13, 14, 15, 16, 18, 17, 17, 17, 17, 16, 16, 16, 16, 16, 16, 16, 17, 17, 17, 17, 17, 17, 17, 17, 17, 17, 17, 17, 17, 17, 17, 17, 17, 17, 17, 17, 17, 17, 17, 17, 17, 17, 17, 17, 17, 17, 17, 17, 17, 17, 17, 17, 17, 17, 17, 17, 17, 17, 17, 17, 17, 17, 17, 17, 17, 17, 17, 17, 17, 17, 17, 17, 17, 17, 17, 17, 17, 17, 17, 18, 19, 19, 19, 19, 19, 19, 19, 19, 19, 18, 18, 17, 17, 16, 16, 17, 19, 19, 19, 19, 19, 20, 19, 19, 19, 20, 21, 19, 17, 17, 16, 20, 20, 21, 21, 20, 19, 18, 19, 19, 19, 20, 19, 18, 17, 17, 18, 18, 19, 18, 18, 17, 18, 19, 19, 17, 17, 19, 22, 20, 20, 20, 19, 18, 17, 17, 15, 17, 18, 20, 21, 21, 21, 18, 18, 18, 18, 18, 19, 19, 21, 21, 20, 21, 22, 22, 23, 21, 21, 20, 19, 19, 20, 20, 18, 18, 18, 16, 15, 15, 15, 17, 17, 17, 17, 17, 17, 17, 16, 16, 16, 17, 17, 18, 18, 25, 25, 25, 24, 22, 20, 20, 20, 19, 19, 18, 18, 18, 17, 19, 19, 18, 18, 18, 17, 17, 15, 16, 18, 20, 18, 14, 13, 10, 18, 18, 18, 22, 25, 24, 20, 17, 19, 44, 63, 52, 32, 14, 14, 18, 18, 15, 15, 17, 16, 17, 17, 17, 18, 19, 19, 19, 12, 13, 10, 13, 10, 11, 12, 13, 14, 14, 14, 16, 16, 16, 16, 15, 17, 18, 18, 18, 18, 18, 18, 17, 17, 17, 17, 17, 17, 17, 17, 17, 17, 17, 17, 17, 17, 17, 17, 17, 17, 17, 17, 17, 17, 17, 17, 17, 17, 17, 17, 17, 17, 17, 17, 17, 17, 17, 17, 17, 17, 17, 17, 17, 17, 17, 17, 17, 17, 17, 17, 17, 17, 17, 17, 17, 17, 17, 17, 17, 17, 17, 17, 17, 17, 17, 18, 19, 19, 19, 19, 19, 19, 19, 19, 19, 18, 18, 17, 17, 17, 17, 18, 19, 19, 19, 19, 20, 20, 19, 19, 19, 19, 20, 19, 17, 17, 16, 20, 20, 20, 20, 19, 17, 17, 18, 18, 19, 19, 18, 18, 17, 17, 18, 18, 19, 18, 18, 17, 18, 19, 18, 16, 16, 18, 21, 20, 20, 19, 18, 17, 17, 17, 16, 17, 18, 18, 19, 20, 20, 17, 17, 17, 17, 18, 18, 18, 20, 20, 19, 21, 21, 22, 22, 20, 20, 19, 19, 18, 19, 19, 18, 17, 16, 15, 15, 15, 15, 17, 17, 17, 17, 17, 17, 17, 16, 16, 16, 17, 17, 18, 18, 22, 23, 23, 22, 21, 20, 19, 19, 18, 18, 18, 17, 17, 17, 18, 18, 18, 18, 17, 17, 17, 18, 18, 16, 13, 12, 13, 15, 18, 20, 20, 13, 8, 16, 31, 40, 46, 61, 63, 49, 38, 26, 21, 15, 13, 18, 18, 15, 16, 17, 17, 17, 17, 17, 17, 17, 12, 12, 12, 12, 14, 14, 14, 14, 15, 16, 16, 17, 17, 17, 18, 19, 19, 19, 18, 18, 18, 17, 17, 17, 18, 18, 18, 18, 19, 18, 18, 18, 18, 17, 17, 17, 17, 17, 17, 17, 17, 17, 17, 17, 17, 17, 17, 17, 17, 17, 17, 17, 17, 17, 17, 17, 17, 17, 17, 17, 17, 17, 17, 17, 17, 17, 17, 17, 17, 17, 17, 17, 17, 17, 17, 17, 17, 17, 17, 17, 17, 17, 17, 17, 18, 19, 19, 19, 19, 19, 19, 19, 19, 19, 19, 19, 19, 18, 18, 18, 19, 20, 20, 19, 19, 19, 20, 19, 19, 18, 18, 19, 18, 18, 18, 18, 20, 20, 20, 19, 18, 16, 16, 17, 17, 18, 19, 18, 18, 17, 17, 18, 18, 19, 18, 18, 17, 19, 19, 18, 16, 15, 17, 19, 20, 18, 17, 16, 16, 18, 18, 17, 17, 17, 17, 17, 18, 18, 17, 17, 17, 17, 17, 18, 18, 19, 19, 18, 20, 20, 20, 21, 19, 19, 18, 17, 17, 17, 18, 16, 17, 16, 15, 15, 15, 15, 17, 17, 17, 17, 17, 17, 17, 16, 16, 16, 17, 17, 18, 18, 21, 21, 21, 19, 18, 18, 17, 18, 18, 17, 16, 16, 16, 15, 16, 16, 17, 17, 17, 17, 18, 14, 16, 17, 16, 17, 20, 25, 16, 17, 27, 42, 53, 56, 54, 55, 59, 53, 31, 28, 51, 60, 41, 23, 14, 20, 22, 19, 21, 20, 19, 19, 18, 17, 16, 16, 15, 15, 15, 15, 14, 15, 15, 17, 18, 18, 19, 19, 19, 19, 19, 19, 18, 18, 17, 16, 16, 17, 17, 17, 18, 18, 19, 19, 20, 19, 19, 18, 18, 17, 17, 17, 17, 17, 17, 17, 17, 17, 17, 17, 17, 17, 17, 17, 17, 17, 17, 17, 17, 17, 17, 17, 17, 17, 17, 17, 17, 17, 17, 17, 17, 17, 17, 17, 17, 17, 17, 17, 17, 17, 17, 17, 17, 17, 17, 17, 17, 17, 17, 17, 18, 18, 18, 18, 18, 18, 18, 18, 18, 18, 18, 19, 19, 19, 19, 19, 20, 20, 20, 19, 19, 19, 20, 19, 18, 18, 18, 18, 18, 18, 18, 18, 20, 21, 20, 19, 17, 16, 14, 15, 16, 17, 18, 18, 18, 17, 17, 18, 18, 19, 18, 18, 17, 19, 19, 18, 16, 14, 16, 19, 19, 18, 16, 15, 16, 17, 19, 19, 18, 16, 15, 15, 16, 16, 16, 16, 16, 16, 16, 17, 17, 18, 18, 17, 18, 19, 20, 20, 18, 18, 17, 16, 16, 17, 17, 15, 15, 15, 14, 14, 15, 15, 17, 17, 17, 17, 17, 17, 17, 16, 16, 16, 17, 17, 18, 18, 19, 19, 18, 17, 17, 16, 16, 17, 17, 16, 15, 15, 15, 15, 15, 15, 16, 17, 17, 17, 18, 16, 20, 24, 22, 18, 16, 17, 33, 52, 70, 70, 57, 45, 42, 45, 46, 44, 30, 28, 53, 77, 68, 48, 29, 24, 25, 24, 22, 20, 19, 18, 17, 15, 14, 13, 17, 18, 18, 17, 17, 17, 17, 18, 18, 18, 19, 19, 20, 20, 20, 20, 19, 18, 17, 17, 16, 17, 17, 18, 18, 19, 20, 20, 20, 20, 20, 19, 18, 17, 17, 17, 17, 17, 17, 17, 17, 17, 17, 17, 17, 17, 17, 17, 17, 17, 17, 17, 17, 17, 17, 17, 17, 17, 17, 17, 17, 17, 17, 17, 17, 17, 17, 17, 17, 17, 17, 17, 17, 17, 17, 17, 17, 17, 17, 17, 17, 17, 17, 17, 17, 17, 17, 17, 17, 17, 17, 17, 17, 17, 17, 18, 19, 19, 19, 20, 20, 21, 20, 19, 18, 20, 20, 19, 18, 17, 17, 17, 18, 19, 19, 20, 21, 21, 20, 18, 17, 15, 14, 15, 15, 17, 18, 18, 18, 18, 17, 18, 18, 19, 18, 18, 17, 19, 19, 17, 15, 14, 15, 18, 19, 18, 15, 14, 16, 17, 20, 19, 18, 16, 15, 14, 15, 16, 16, 16, 16, 16, 16, 17, 17, 18, 17, 17, 18, 18, 19, 20, 18, 17, 17, 16, 15, 16, 17, 15, 15, 15, 14, 14, 15, 15, 17, 17, 17, 17, 17, 17, 17, 16, 16, 16, 17, 17, 18, 18, 18, 18, 18, 17, 16, 15, 14, 15, 15, 15, 15, 15, 15, 15, 15, 15, 17, 17, 17, 18, 19, 20, 22, 24, 22, 23, 30, 39, 66, 65, 55, 46, 43, 45, 47, 54, 42, 44, 44, 26, 32, 60, 87, 75, 46, 26, 25, 27, 20, 19, 18, 17, 15, 14, 12, 12, 18, 20, 20, 19, 19, 18, 18, 17, 17, 17, 18, 18, 19, 19, 22, 22, 21, 21, 20, 18, 18, 17, 17, 18, 19, 20, 20, 21, 22, 21, 20, 20, 19, 18, 17, 17, 17, 17, 17, 17, 17, 17, 17, 17, 17, 17, 17, 17, 17, 17, 17, 17, 17, 17, 17, 17, 17, 17, 17, 17, 17, 17, 17, 17, 17, 17, 17, 17, 17, 17, 17, 17, 17, 17, 17, 17, 17, 17, 17, 17, 17, 17, 17, 17, 17, 17, 17, 17, 17, 17, 17, 17, 17, 17, 18, 18, 19, 19, 20, 21, 21, 21, 21, 19, 18, 19, 20, 19, 18, 17, 16, 16, 17, 19, 19, 20, 21, 20, 18, 17, 17, 16, 16, 17, 16, 15, 16, 17, 16, 15, 14, 15, 16, 17, 17, 16, 16, 16, 15, 15, 17, 18, 16, 14, 15, 17, 18, 20, 19, 17, 16, 14, 15, 16, 17, 16, 15, 14, 15, 15, 15, 16, 17, 18, 18, 19, 19, 19, 21, 21, 21, 21, 19, 18, 18, 19, 20, 18, 16, 14, 16, 17, 14, 13, 14, 17, 20, 17, 15, 16, 18, 19, 17, 18, 18, 18, 18, 18, 18, 18, 16, 16, 16, 15, 14, 14, 15, 17, 13, 15, 20, 21, 20, 21, 14, 15, 15, 14, 16, 20, 24, 21, 23, 30, 42, 52, 56, 55, 52, 46, 37, 35, 40, 47, 50, 53, 50, 47, 45, 38, 35, 39, 76, 92, 70, 27, 28, 28, 26, 25, 20, 16, 18, 23, 23, 17, 16, 18, 20, 20, 20, 19, 20, 22, 22, 19, 19, 20, 21, 22, 18, 17, 17, 18, 18, 19, 19, 19, 19, 19, 18, 18, 17, 17, 17, 17, 17, 18, 18, 19, 19, 19, 19, 19, 18, 18, 17, 17, 17, 17, 17, 17, 17, 17, 17, 17, 17, 17, 17, 17, 17, 17, 16, 17, 17, 18, 18, 17, 16, 16, 17, 18, 19, 19, 19, 18, 18, 19, 19, 19, 19, 19, 19, 19, 19, 19, 19, 19, 19, 19, 18, 18, 17, 16, 15, 15, 14, 14, 14, 14, 15, 15, 16, 16, 18, 19, 19, 19, 19, 19, 19, 19, 19, 19, 19, 19, 19, 19, 19, 19, 19, 19, 21, 20, 19, 17, 17, 17, 17, 18, 16, 15, 17, 18, 17, 16, 15, 16, 17, 17, 18, 17, 17, 17, 16, 16, 17, 18, 17, 15, 14, 16, 19, 21, 22, 21, 20, 19, 19, 19, 18, 17, 15, 14, 16, 16, 16, 16, 17, 18, 18, 19, 19, 19, 21, 21, 21, 21, 19, 18, 18, 19, 20, 19, 16, 14, 13, 14, 14, 15, 14, 13, 18, 19, 20, 20, 18, 19, 19, 18, 18, 18, 18, 18, 18, 18, 16, 16, 16, 15, 15, 16, 16, 14, 17, 18, 15, 14, 16, 18, 19, 20, 25, 24, 16, 13, 20, 33, 50, 68, 73, 62, 43, 28, 34, 35, 35, 38, 43, 46, 47, 50, 50, 50, 47, 39, 33, 33, 63, 88, 85, 51, 22, 21, 19, 15, 14, 17, 20, 22, 21, 19, 22, 25, 27, 27, 26, 21, 18, 19, 20, 18, 20, 21, 20, 18, 18, 18, 18, 18, 19, 19, 19, 19, 19, 19, 18, 18, 17, 17, 17, 17, 17, 18, 18, 19, 19, 19, 19, 19, 18, 18, 17, 17, 17, 17, 17, 17, 17, 17, 17, 17, 17, 17, 17, 17, 17, 17, 16, 17, 17, 18, 18, 17, 16, 16, 17, 18, 19, 19, 19, 18, 19, 19, 19, 19, 19, 19, 19, 19, 19, 19, 19, 19, 19, 19, 18, 18, 17, 17, 16, 15, 15, 15, 15, 15, 15, 16, 16, 16, 18, 19, 19, 19, 19, 19, 19, 19, 19, 19, 19, 19, 19, 19, 19, 19, 19, 19, 21, 20, 19, 18, 18, 18, 18, 19, 17, 16, 17, 19, 18, 16, 16, 16, 17, 18, 19, 18, 18, 18, 17, 17, 18, 19, 18, 16, 15, 16, 18, 19, 20, 20, 20, 18, 18, 18, 17, 17, 16, 16, 16, 17, 17, 17, 17, 18, 18, 19, 19, 19, 21, 21, 21, 21, 19, 18, 18, 19, 20, 19, 16, 15, 14, 14, 16, 18, 16, 11, 14, 19, 22, 21, 18, 17, 18, 18, 18, 18, 18, 18, 18, 18, 16, 16, 18, 17, 17, 17, 17, 13, 19, 21, 19, 22, 27, 25, 22, 14, 16, 27, 32, 37, 50, 87, 85, 67, 47, 32, 29, 31, 43, 43, 38, 37, 39, 41, 44, 47, 47, 48, 44, 35, 26, 19, 40, 72, 97, 89, 48, 41, 31, 29, 31, 35, 31, 24, 17, 14, 17, 18, 18, 20, 24, 26, 26, 26, 22, 17, 15, 17, 19, 19, 18, 19, 19, 19, 19, 19, 19, 19, 19, 19, 18, 18, 17, 17, 17, 17, 17, 18, 18, 19, 19, 19, 19, 19, 18, 18, 17, 17, 17, 17, 17, 17, 17, 17, 17, 17, 17, 17, 17, 17, 17, 17, 16, 17, 17, 18, 18, 17, 17, 16, 17, 18, 19, 19, 19, 18, 19, 19, 19, 19, 19, 19, 19, 19, 19, 19, 19, 19, 19, 19, 18, 18, 18, 17, 17, 16, 15, 15, 16, 16, 16, 16, 16, 16, 17, 19, 19, 19, 19, 19, 19, 19, 19, 19, 19, 19, 19, 19, 19, 19, 19, 19, 21, 20, 19, 19, 18, 19, 19, 20, 18, 18, 19, 20, 19, 18, 17, 18, 19, 19, 19, 19, 19, 19, 18, 18, 19, 20, 19, 17, 17, 17, 17, 17, 17, 16, 16, 14, 14, 15, 16, 17, 18, 19, 18, 17, 17, 17, 17, 18, 18, 19, 19, 19, 21, 21, 21, 21, 19, 18, 18, 19, 20, 19, 16, 17, 16, 17, 18, 19, 17, 14, 14, 17, 19, 19, 16, 16, 17, 18, 18, 18, 18, 18, 18, 18, 18, 18, 18, 18, 18, 17, 18, 21, 22, 21, 21, 21, 20, 19, 23, 29, 49, 72, 82, 79, 74, 48, 39, 33, 29, 30, 34, 36, 39, 40, 44, 45, 46, 48, 50, 50, 51, 51, 48, 45, 40, 33, 34, 52, 75, 84, 64, 62, 55, 55, 61, 71, 74, 73, 72, 73, 66, 62, 58, 54, 48, 40, 30, 21, 15, 13, 16, 20, 21, 17, 19, 20, 19, 19, 19, 19, 19, 19, 19, 19, 18, 18, 17, 17, 17, 17, 17, 18, 18, 19, 19, 19, 19, 19, 18, 18, 17, 17, 17, 17, 17, 17, 17, 17, 17, 17, 17, 17, 17, 17, 17, 17, 16, 17, 17, 18, 18, 17, 16, 16, 17, 18, 19, 19, 19, 18, 19, 19, 19, 19, 19, 19, 19, 19, 19, 19, 19, 19, 19, 19, 18, 17, 17, 16, 16, 16, 16, 16, 16, 15, 15, 15, 15, 15, 17, 19, 19, 19, 19, 19, 19, 19, 19, 19, 19, 19, 19, 19, 19, 19, 19, 19, 21, 20, 19, 19, 19, 20, 21, 21, 19, 18, 20, 21, 20, 19, 18, 19, 19, 20, 21, 20, 20, 20, 19, 19, 20, 21, 20, 18, 18, 17, 17, 17, 17, 18, 18, 17, 16, 16, 16, 17, 19, 21, 19, 19, 19, 18, 18, 18, 18, 19, 19, 19, 21, 21, 21, 21, 19, 18, 18, 19, 20, 18, 16, 16, 17, 18, 17, 16, 17, 17, 18, 18, 16, 17, 18, 18, 17, 18, 18, 18, 18, 18, 18, 18, 19, 19, 19, 18, 18, 18, 19, 24, 20, 21, 22, 16, 19, 37, 68, 107, 131, 112, 72, 40, 23, 34, 37, 34, 29, 25, 25, 29, 31, 37, 43, 47, 49, 50, 52, 54, 55, 50, 43, 41, 39, 32, 27, 28, 31, 27, 27, 20, 21, 29, 35, 41, 44, 45, 43, 42, 44, 50, 64, 78, 83, 76, 63, 40, 27, 18, 18, 20, 20, 16, 19, 21, 21, 20, 19, 19, 19, 19, 19, 19, 18, 18, 17, 17, 17, 17, 17, 18, 18, 19, 19, 19, 19, 19, 18, 18, 17, 17, 17, 17, 17, 17, 17, 17, 17, 17, 17, 17, 17, 17, 17, 17, 16, 17, 17, 18, 18, 17, 16, 16, 17, 18, 19, 19, 19, 18, 18, 19, 19, 19, 19, 19, 19, 19, 19, 19, 19, 19, 19, 19, 18, 17, 17, 17, 17, 17, 17, 17, 17, 17, 16, 16, 15, 15, 17, 19, 19, 19, 19, 19, 19, 19, 19, 19, 19, 19, 19, 19, 19, 19, 19, 19, 21, 21, 20, 19, 20, 20, 20, 20, 19, 19, 20, 20, 20, 19, 18, 19, 20, 20, 20, 20, 20, 19, 19, 19, 20, 21, 20, 19, 18, 18, 18, 18, 19, 20, 21, 20, 19, 18, 17, 17, 18, 19, 19, 19, 18, 18, 18, 18, 18, 18, 19, 19, 20, 20, 20, 20, 18, 17, 18, 19, 19, 19, 17, 16, 17, 18, 15, 13, 15, 18, 22, 18, 16, 17, 20, 21, 19, 18, 18, 18, 18, 18, 17, 18, 19, 17, 18, 18, 19, 22, 20, 19, 14, 22, 29, 28, 44, 79, 120, 117, 87, 53, 39, 34, 23, 25, 30, 28, 21, 14, 16, 23, 38, 40, 40, 38, 38, 43, 50, 49, 47, 40, 36, 38, 40, 37, 32, 32, 32, 26, 34, 23, 27, 27, 26, 30, 32, 31, 30, 27, 30, 24, 17, 22, 36, 51, 63, 66, 56, 33, 17, 16, 21, 22, 19, 20, 23, 22, 20, 18, 17, 19, 19, 19, 18, 17, 17, 17, 17, 17, 17, 17, 17, 18, 18, 18, 18, 18, 17, 17, 16, 16, 17, 17, 17, 17, 17, 18, 18, 17, 17, 17, 17, 16, 16, 17, 17, 17, 17, 17, 18, 17, 16, 16, 17, 18, 19, 19, 18, 18, 18, 18, 18, 19, 19, 19, 19, 19, 19, 19, 19, 19, 19, 19, 18, 17, 17, 17, 17, 17, 17, 17, 17, 17, 16, 16, 15, 15, 17, 19, 19, 19, 19, 19, 19, 19, 19, 19, 19, 19, 19, 19, 19, 19, 19, 19, 22, 22, 21, 20, 19, 18, 17, 18, 18, 18, 18, 18, 18, 18, 18, 18, 18, 18, 18, 18, 18, 18, 18, 18, 18, 17, 18, 17, 17, 17, 17, 17, 16, 16, 16, 15, 15, 15, 16, 17, 17, 17, 17, 17, 17, 17, 17, 17, 17, 17, 17, 17, 17, 17, 17, 17, 16, 16, 16, 17, 17, 18, 18, 19, 18, 18, 17, 17, 18, 19, 19, 17, 16, 17, 21, 22, 21, 21, 18, 20, 20, 16, 12, 15, 22, 14, 18, 23, 26, 33, 25, 20, 25, 41, 62, 81, 91, 93, 76, 57, 34, 21, 19, 19, 18, 18, 18, 18, 18, 19, 20, 21, 27, 27, 26, 30, 35, 38, 40, 45, 43, 39, 36, 34, 32, 31, 30, 30, 28, 26, 25, 24, 24, 25, 25, 25, 26, 26, 26, 26, 26, 23, 25, 30, 31, 29, 32, 48, 58, 56, 42, 32, 26, 16, 18, 22, 22, 20, 19, 17, 16, 19, 20, 19, 17, 17, 17, 16, 17, 18, 19, 17, 14, 13, 14, 15, 15, 15, 15, 15, 15, 15, 16, 17, 18, 18, 19, 20, 21, 18, 17, 18, 17, 15, 16, 18, 18, 17, 16, 16, 18, 17, 16, 17, 18, 20, 20, 17, 16, 17, 17, 16, 15, 17, 19, 20, 20, 19, 19, 19, 18, 18, 17, 17, 17, 17, 17, 17, 17, 17, 17, 17, 17, 17, 17, 17, 17, 17, 17, 17, 17, 18, 18, 19, 19, 19, 19, 19, 19, 19, 19, 19, 18, 18, 18, 18, 16, 16, 16, 17, 18, 19, 19, 18, 18, 18, 18, 18, 18, 18, 18, 18, 18, 18, 18, 18, 18, 19, 18, 18, 16, 16, 15, 15, 15, 15, 16, 16, 16, 17, 17, 16, 16, 16, 16, 17, 17, 17, 17, 17, 17, 17, 17, 17, 17, 17, 17, 17, 17, 17, 17, 17, 16, 16, 16, 17, 18, 18, 18, 19, 18, 18, 17, 17, 18, 19, 19, 17, 15, 17, 20, 21, 20, 23, 20, 20, 21, 16, 13, 15, 25, 24, 21, 26, 27, 24, 31, 58, 81, 97, 99, 88, 64, 35, 19, 13, 13, 10, 14, 19, 20, 17, 19, 19, 18, 16, 14, 14, 14, 21, 19, 19, 23, 27, 25, 17, 16, 21, 28, 28, 25, 23, 24, 22, 21, 20, 20, 20, 20, 21, 21, 21, 21, 22, 23, 24, 24, 21, 21, 23, 28, 27, 23, 22, 20, 24, 47, 76, 78, 52, 27, 31, 29, 19, 17, 19, 20, 20, 19, 18, 17, 17, 16, 16, 16, 16, 18, 19, 17, 14, 13, 14, 15, 15, 15, 15, 15, 15, 15, 16, 17, 18, 18, 19, 20, 20, 18, 18, 19, 17, 16, 16, 18, 18, 17, 16, 16, 18, 18, 16, 16, 18, 20, 20, 18, 16, 17, 17, 16, 15, 17, 19, 21, 19, 19, 19, 19, 18, 18, 17, 17, 17, 17, 17, 17, 17, 17, 17, 17, 17, 17, 17, 17, 17, 17, 17, 17, 17, 18, 18, 19, 19, 19, 19, 19, 19, 19, 19, 19, 18, 18, 18, 18, 16, 17, 17, 18, 18, 18, 19, 18, 18, 18, 18, 18, 18, 18, 18, 18, 18, 18, 18, 18, 18, 17, 18, 18, 19, 20, 21, 21, 21, 21, 20, 19, 18, 17, 17, 17, 17, 17, 17, 17, 17, 17, 17, 17, 17, 17, 17, 17, 17, 17, 17, 17, 17, 17, 17, 17, 16, 16, 16, 17, 17, 18, 18, 19, 18, 18, 17, 17, 18, 19, 18, 17, 15, 16, 19, 20, 19, 18, 17, 18, 21, 18, 18, 23, 23, 29, 21, 21, 22, 26, 61, 114, 119, 95, 53, 24, 14, 8, 19, 19, 17, 19, 22, 20, 16, 19, 19, 17, 16, 15, 15, 15, 16, 17, 19, 21, 23, 22, 20, 17, 19, 22, 23, 21, 19, 17, 17, 17, 18, 19, 21, 23, 25, 24, 24, 23, 23, 22, 21, 20, 21, 19, 17, 17, 19, 23, 27, 24, 18, 22, 52, 82, 87, 73, 34, 23, 23, 21, 19, 20, 21, 19, 16, 17, 16, 16, 16, 16, 17, 18, 19, 17, 15, 14, 15, 15, 15, 15, 15, 15, 15, 15, 16, 17, 17, 18, 18, 19, 19, 19, 19, 19, 18, 16, 16, 18, 18, 17, 16, 16, 18, 17, 16, 16, 19, 20, 20, 17, 16, 17, 17, 16, 15, 17, 19, 20, 19, 19, 19, 19, 18, 18, 17, 17, 17, 17, 17, 17, 17, 17, 17, 17, 17, 17, 17, 17, 17, 17, 17, 17, 17, 18, 18, 19, 19, 19, 19, 19, 19, 19, 19, 19, 18, 18, 18, 18, 21, 21, 20, 19, 18, 18, 17, 18, 18, 18, 18, 18, 18, 18, 18, 18, 18, 18, 18, 18, 18, 18, 18, 18, 17, 17, 17, 17, 17, 17, 17, 18, 18, 19, 19, 18, 17, 17, 17, 17, 17, 17, 17, 17, 17, 17, 17, 17, 17, 17, 17, 17, 17, 17, 17, 17, 16, 16, 16, 17, 17, 18, 18, 19, 18, 18, 17, 17, 18, 19, 19, 18, 16, 16, 17, 18, 17, 17, 15, 16, 18, 15, 15, 20, 26, 24, 24, 47, 72, 84, 101, 90, 69, 39, 20, 15, 14, 13, 10, 21, 20, 16, 15, 17, 19, 19, 18, 18, 17, 17, 18, 19, 20, 16, 19, 21, 18, 14, 16, 22, 21, 16, 14, 15, 19, 19, 16, 18, 18, 18, 16, 16, 17, 17, 17, 18, 18, 18, 19, 19, 19, 14, 15, 17, 16, 17, 18, 16, 18, 23, 23, 23, 40, 68, 85, 79, 61, 38, 25, 23, 23, 20, 20, 20, 18, 17, 16, 16, 16, 17, 19, 20, 18, 15, 14, 15, 16, 16, 16, 16, 16, 16, 16, 17, 17, 17, 17, 17, 18, 18, 19, 20, 21, 19, 16, 16, 18, 18, 17, 16, 16, 18, 17, 16, 16, 18, 20, 20, 17, 16, 17, 17, 16, 15, 17, 19, 21, 20, 19, 19, 19, 18, 18, 17, 17, 17, 17, 17, 17, 17, 17, 17, 17, 17, 17, 17, 17, 17, 17, 17, 17, 17, 18, 18, 19, 19, 19, 19, 19, 19, 19, 19, 19, 18, 18, 18, 18, 22, 22, 20, 19, 19, 18, 18, 18, 18, 18, 18, 18, 18, 18, 18, 18, 18, 18, 18, 18, 18, 19, 18, 18, 17, 16, 15, 15, 15, 15, 16, 17, 19, 20, 21, 19, 19, 19, 18, 17, 17, 17, 17, 17, 17, 17, 17, 17, 17, 17, 17, 17, 17, 17, 17, 17, 16, 16, 16, 17, 17, 18, 18, 19, 18, 18, 17, 17, 18, 19, 19, 17, 16, 16, 17, 18, 17, 19, 16, 17, 18, 16, 17, 23, 26, 33, 66, 104, 122, 116, 92, 38, 12, 3, 12, 16, 8, 2, 13, 10, 12, 13, 15, 18, 20, 20, 18, 18, 18, 18, 18, 19, 20, 18, 19, 20, 16, 13, 13, 16, 16, 15, 14, 14, 15, 16, 15, 16, 17, 15, 14, 14, 14, 14, 14, 14, 15, 16, 16, 17, 18, 13, 10, 12, 15, 13, 16, 17, 13, 9, 14, 21, 20, 20, 37, 66, 102, 103, 86, 62, 40, 26, 18, 23, 24, 22, 20, 18, 17, 16, 17, 19, 20, 18, 15, 14, 15, 16, 16, 16, 16, 16, 16, 16, 16, 17, 17, 17, 17, 17, 17, 19, 21, 21, 19, 17, 16, 18, 18, 17, 16, 16, 18, 18, 16, 16, 18, 20, 20, 18, 16, 17, 17, 16, 15, 17, 19, 20, 19, 19, 19, 19, 18, 18, 17, 17, 17, 17, 17, 17, 17, 17, 17, 17, 17, 17, 17, 17, 17, 17, 17, 17, 17, 18, 18, 19, 19, 19, 19, 19, 19, 19, 19, 19, 18, 18, 18, 18, 17, 18, 18, 18, 18, 18, 19, 18, 18, 18, 18, 18, 18, 18, 18, 18, 18, 18, 18, 18, 18, 17, 18, 18, 19, 19, 19, 20, 20, 19, 19, 19, 19, 19, 19, 18, 18, 18, 17, 17, 16, 16, 16, 16, 16, 17, 17, 17, 17, 17, 17, 18, 18, 19, 19, 19, 18, 18, 19, 19, 18, 18, 17, 18, 18, 18, 17, 18, 18, 18, 19, 17, 16, 17, 17, 17, 17, 19, 16, 21, 22, 20, 23, 24, 33, 73, 119, 135, 129, 103, 58, 20, 12, 12, 14, 13, 10, 7, 12, 16, 16, 18, 20, 22, 21, 19, 19, 19, 18, 18, 18, 18, 19, 17, 17, 16, 17, 17, 16, 16, 15, 18, 19, 17, 13, 13, 15, 14, 14, 15, 15, 16, 17, 17, 18, 18, 17, 17, 16, 16, 15, 11, 11, 12, 9, 12, 17, 18, 18, 13, 13, 19, 19, 20, 32, 57, 89, 102, 86, 66, 37, 18, 22, 24, 23, 21, 18, 17, 17, 18, 19, 19, 18, 16, 15, 16, 16, 16, 16, 17, 17, 16, 16, 16, 16, 17, 17, 17, 17, 17, 19, 20, 20, 18, 17, 17, 18, 19, 18, 17, 17, 18, 17, 16, 17, 18, 18, 19, 18, 17, 18, 18, 17, 17, 17, 19, 19, 18, 18, 18, 18, 18, 18, 18, 18, 18, 18, 18, 18, 17, 17, 16, 17, 17, 17, 17, 18, 18, 18, 18, 18, 17, 18, 19, 19, 19, 18, 19, 19, 19, 18, 18, 18, 18, 17, 17, 17, 22, 21, 20, 20, 18, 18, 18, 18, 18, 18, 18, 18, 18, 18, 18, 18, 18, 18, 18, 18, 18, 18, 18, 18, 18, 18, 18, 18, 18, 18, 18, 18, 18, 18, 18, 17, 17, 17, 16, 15, 15, 15, 15, 15, 15, 16, 16, 17, 17, 17, 18, 19, 20, 21, 21, 21, 22, 22, 22, 21, 19, 18, 17, 18, 18, 18, 18, 18, 18, 18, 18, 19, 18, 18, 17, 17, 19, 19, 20, 22, 25, 24, 31, 56, 90, 123, 134, 122, 104, 69, 33, 18, 15, 15, 11, 13, 10, 13, 10, 12, 19, 18, 16, 16, 18, 19, 18, 19, 19, 19, 19, 19, 19, 19, 16, 15, 15, 15, 15, 15, 15, 15, 16, 16, 15, 13, 14, 16, 16, 16, 16, 15, 15, 14, 14, 15, 15, 15, 15, 15, 15, 15, 11, 13, 10, 12, 12, 12, 13, 14, 17, 18, 17, 15, 15, 14, 14, 34, 74, 82, 74, 84, 65, 41, 31, 25, 19, 17, 18, 18, 16, 18, 19, 19, 18, 18, 17, 17, 16, 17, 17, 18, 18, 17, 16, 16, 16, 17, 18, 18, 18, 18, 19, 19, 18, 18, 18, 18, 19, 19, 19, 19, 18, 18, 17, 17, 17, 17, 17, 18, 18, 19, 19, 19, 19, 19, 18, 18, 17, 17, 17, 17, 17, 18, 18, 19, 19, 19, 19, 20, 19, 18, 17, 15, 17, 17, 16, 16, 18, 19, 19, 18, 18, 17, 19, 20, 20, 18, 17, 18, 20, 20, 18, 16, 17, 17, 17, 17, 17, 25, 24, 23, 20, 18, 17, 16, 18, 18, 18, 18, 18, 18, 18, 18, 18, 18, 18, 18, 18, 18, 18, 18, 18, 18, 18, 18, 18, 18, 18, 18, 18, 18, 18, 18, 17, 17, 17, 16, 16, 16, 16, 16, 16, 16, 16, 17, 17, 17, 17, 18, 19, 20, 21, 21, 21, 21, 21, 21, 21, 20, 18, 18, 19, 19, 19, 19, 19, 19, 19, 20, 19, 19, 18, 17, 16, 17, 15, 25, 20, 24, 25, 40, 109, 147, 138, 121, 102, 63, 21, 13, 30, 21, 13, 15, 13, 11, 17, 20, 18, 16, 16, 18, 19, 18, 19, 19, 19, 19, 19, 19, 19, 17, 17, 17, 17, 17, 17, 17, 17, 18, 18, 16, 15, 16, 18, 20, 19, 17, 16, 15, 16, 17, 17, 17, 17, 17, 17, 17, 17, 16, 16, 16, 16, 16, 16, 17, 15, 15, 15, 16, 15, 14, 13, 28, 61, 71, 69, 84, 85, 80, 61, 39, 19, 15, 20, 22, 16, 17, 19, 19, 18, 18, 17, 17, 16, 17, 17, 18, 18, 17, 17, 17, 17, 18, 19, 19, 19, 19, 20, 20, 19, 19, 19, 19, 20, 19, 19, 19, 18, 18, 17, 17, 17, 17, 17, 18, 18, 19, 19, 19, 19, 19, 18, 18, 17, 17, 17, 17, 17, 18, 18, 19, 19, 19, 19, 20, 19, 18, 17, 15, 17, 18, 15, 15, 17, 17, 16, 16, 16, 16, 18, 20, 20, 18, 17, 18, 20, 20, 18, 16, 17, 17, 17, 17, 17, 17, 17, 17, 18, 18, 18, 19, 18, 18, 18, 18, 18, 18, 18, 18, 18, 18, 18, 18, 18, 18, 18, 18, 18, 18, 18, 18, 18, 18, 18, 18, 18, 18, 18, 18, 17, 17, 17, 17, 17, 17, 17, 17, 17, 17, 17, 17, 17, 17, 17, 18, 19, 19, 20, 19, 19, 19, 19, 20, 21, 21, 20, 19, 20, 20, 20, 20, 20, 20, 20, 21, 21, 20, 18, 16, 15, 17, 18, 15, 23, 22, 25, 66, 116, 134, 129, 110, 86, 50, 21, 25, 32, 17, 13, 20, 18, 14, 21, 20, 18, 16, 16, 18, 19, 18, 19, 19, 19, 19, 19, 19, 19, 18, 17, 17, 17, 17, 17, 17, 17, 18, 18, 17, 15, 16, 19, 21, 20, 17, 15, 15, 16, 18, 18, 17, 17, 17, 17, 17, 17, 19, 20, 20, 19, 19, 18, 17, 16, 16, 16, 15, 13, 13, 10, 8, 21, 47, 63, 67, 76, 80, 83, 78, 59, 35, 22, 21, 21, 18, 20, 21, 21, 20, 20, 19, 19, 18, 19, 19, 20, 20, 19, 18, 17, 18, 19, 20, 20, 20, 19, 20, 20, 20, 19, 19, 20, 20, 20, 19, 19, 18, 18, 17, 17, 17, 17, 17, 18, 18, 19, 19, 19, 19, 19, 18, 18, 17, 17, 17, 17, 17, 18, 18, 19, 19, 19, 19, 20, 19, 18, 17, 15, 17, 18, 15, 15, 17, 17, 16, 16, 16, 16, 17, 20, 20, 18, 17, 18, 20, 20, 18, 16, 17, 17, 17, 17, 17, 19, 19, 18, 19, 18, 18, 18, 18, 18, 18, 18, 18, 18, 18, 18, 18, 18, 18, 18, 18, 18, 18, 18, 18, 18, 18, 18, 18, 18, 18, 18, 18, 18, 18, 18, 17, 17, 17, 17, 18, 18, 18, 18, 18, 18, 17, 17, 17, 17, 17, 18, 19, 19, 19, 18, 18, 18, 18, 19, 20, 21, 21, 21, 21, 21, 21, 21, 21, 21, 21, 24, 23, 21, 19, 16, 15, 16, 23, 8, 23, 17, 38, 115, 141, 120, 119, 90, 51, 29, 23, 27, 24, 15, 15, 22, 22, 20, 24, 21, 18, 16, 16, 18, 19, 18, 19, 19, 19, 19, 19, 19, 19, 18, 18, 18, 18, 18, 18, 18, 18, 19, 19, 17, 16, 17, 19, 21, 20, 18, 17, 16, 17, 18, 18, 18, 18, 18, 18, 18, 18, 22, 23, 23, 22, 20, 20, 19, 19, 18, 16, 15, 12, 13, 10, 8, 19, 36, 56, 66, 69, 73, 77, 88, 79, 55, 33, 21, 18, 17, 20, 21, 21, 20, 20, 19, 19, 18, 19, 19, 20, 20, 19, 18, 17, 17, 18, 19, 19, 19, 19, 20, 20, 19, 19, 19, 19, 20, 19, 19, 19, 18, 18, 17, 17, 17, 17, 17, 18, 18, 19, 19, 19, 19, 19, 18, 18, 17, 17, 17, 17, 17, 18, 18, 19, 19, 19, 19, 20, 19, 18, 17, 15, 17, 18, 16, 16, 18, 20, 19, 19, 19, 18, 19, 21, 20, 18, 17, 18, 20, 20, 18, 16, 17, 17, 17, 17, 17, 21, 21, 20, 19, 18, 18, 17, 18, 18, 18, 18, 18, 18, 18, 18, 18, 18, 18, 18, 18, 18, 18, 18, 18, 18, 18, 18, 18, 18, 18, 18, 18, 18, 18, 18, 17, 17, 17, 18, 18, 19, 19, 19, 19, 19, 18, 17, 17, 17, 17, 18, 19, 19, 18, 18, 17, 17, 18, 19, 20, 21, 22, 22, 22, 22, 22, 22, 22, 22, 22, 25, 23, 21, 19, 16, 15, 15, 17, 19, 24, 16, 42, 111, 142, 118, 106, 66, 29, 25, 27, 23, 21, 22, 22, 21, 22, 25, 27, 21, 18, 16, 16, 18, 19, 18, 19, 19, 19, 19, 19, 19, 19, 19, 19, 19, 19, 19, 19, 19, 19, 20, 20, 18, 17, 18, 20, 20, 20, 20, 19, 19, 18, 18, 19, 19, 19, 19, 19, 19, 19, 26, 28, 26, 26, 25, 23, 21, 18, 16, 14, 13, 14, 14, 15, 26, 32, 47, 58, 60, 67, 73, 80, 69, 47, 30, 21, 18, 16, 19, 21, 21, 20, 20, 19, 19, 18, 19, 19, 20, 20, 19, 18, 16, 16, 17, 18, 18, 18, 18, 19, 19, 18, 18, 18, 18, 19, 19, 19, 19, 18, 18, 17, 17, 17, 17, 17, 18, 18, 19, 19, 19, 19, 19, 18, 18, 17, 17, 17, 17, 17, 18, 18, 19, 19, 19, 19, 20, 19, 18, 17, 16, 17, 17, 16, 17, 20, 22, 22, 23, 22, 21, 21, 22, 20, 18, 16, 18, 20, 20, 18, 16, 17, 17, 17, 17, 17, 24, 24, 23, 22, 20, 18, 17, 18, 18, 18, 18, 18, 19, 19, 17, 18, 19, 20, 20, 21, 20, 18, 18, 19, 21, 21, 20, 18, 16, 17, 17, 17, 18, 18, 18, 14, 15, 15, 14, 15, 16, 16, 23, 23, 22, 20, 19, 18, 17, 15, 15, 15, 15, 15, 14, 15, 22, 23, 23, 22, 22, 22, 22, 22, 23, 23, 24, 25, 26, 27, 26, 24, 24, 23, 23, 21, 21, 15, 25, 30, 32, 40, 76, 114, 93, 76, 38, 32, 34, 33, 22, 17, 22, 25, 22, 21, 25, 30, 20, 17, 17, 17, 19, 19, 17, 15, 18, 23, 27, 27, 25, 22, 24, 25, 15, 14, 17, 15, 26, 21, 13, 12, 12, 18, 15, 23, 13, 12, 26, 19, 17, 17, 20, 19, 22, 21, 19, 19, 16, 18, 20, 22, 20, 23, 27, 22, 18, 17, 18, 20, 18, 13, 13, 15, 26, 29, 37, 47, 55, 63, 69, 71, 60, 39, 25, 22, 21, 19, 26, 24, 16, 15, 19, 21, 19, 19, 19, 18, 17, 16, 17, 17, 15, 15, 16, 17, 18, 18, 19, 19, 19, 18, 19, 19, 19, 18, 20, 21, 21, 21, 21, 19, 18, 18, 18, 18, 17, 17, 19, 20, 20, 20, 19, 18, 17, 16, 16, 17, 17, 17, 18, 18, 19, 19, 19, 19, 20, 18, 17, 16, 17, 18, 17, 16, 17, 19, 21, 21, 21, 21, 20, 20, 20, 19, 18, 18, 19, 19, 19, 18, 17, 17, 17, 17, 17, 17, 22, 23, 23, 22, 20, 19, 18, 17, 18, 18, 17, 19, 19, 20, 16, 17, 19, 20, 22, 22, 22, 14, 16, 20, 25, 28, 29, 28, 24, 24, 22, 20, 18, 16, 16, 16, 16, 16, 15, 15, 15, 15, 24, 23, 22, 20, 18, 16, 15, 12, 12, 12, 12, 12, 13, 15, 22, 23, 23, 23, 22, 22, 22, 23, 23, 23, 23, 23, 24, 24, 19, 16, 15, 16, 18, 18, 18, 23, 24, 24, 27, 32, 66, 96, 67, 47, 8, 11, 8, 13, 13, 22, 23, 21, 19, 16, 15, 15, 21, 19, 16, 17, 22, 27, 30, 28, 21, 12, 9, 11, 13, 14, 20, 29, 31, 32, 27, 19, 21, 9, 23, 40, 27, 25, 22, 35, 51, 55, 34, 14, 31, 35, 25, 33, 33, 26, 26, 20, 9, 13, 25, 30, 21, 16, 19, 17, 21, 20, 20, 20, 15, 13, 10, 8, 9, 14, 18, 22, 34, 46, 58, 66, 72, 64, 45, 33, 30, 25, 18, 13, 10, 15, 22, 18, 13, 10, 11, 21, 22, 19, 18, 18, 16, 14, 13, 14, 15, 15, 16, 17, 18, 19, 19, 19, 19, 19, 21, 20, 18, 20, 22, 23, 21, 21, 20, 19, 19, 20, 17, 16, 16, 16, 16, 17, 18, 17, 16, 16, 16, 17, 17, 17, 17, 18, 18, 19, 19, 19, 19, 20, 18, 16, 16, 18, 19, 18, 16, 16, 18, 20, 19, 19, 19, 19, 19, 19, 19, 19, 19, 19, 19, 18, 18, 17, 17, 17, 17, 17, 17, 20, 20, 21, 21, 20, 19, 19, 16, 17, 16, 16, 17, 18, 19, 13, 14, 16, 19, 20, 21, 22, 17, 19, 21, 23, 22, 20, 19, 15, 15, 17, 18, 19, 20, 21, 19, 19, 18, 17, 16, 16, 15, 21, 21, 19, 17, 14, 12, 13, 10, 9, 9, 13, 10, 11, 12, 13, 15, 17, 17, 18, 18, 19, 20, 20, 21, 21, 19, 19, 17, 16, 15, 9, 5, 2, 3, 6, 9, 13, 10, 19, 13, 12, 13, 33, 68, 64, 54, 42, 18, 26, 16, 14, 20, 17, 14, 13, 14, 18, 19, 18, 28, 29, 28, 28, 29, 27, 24, 23, 23, 25, 31, 35, 30, 22, 19, 20, 32, 37, 39, 49, 45, 33, 42, 45, 34, 50, 57, 61, 46, 49, 47, 53, 39, 28, 39, 41, 30, 28, 36, 34, 27, 28, 25, 30, 28, 27, 32, 28, 29, 29, 29, 29, 30, 31, 32, 32, 30, 27, 26, 29, 36, 43, 47, 47, 60, 78, 78, 60, 41, 32, 29, 25, 20, 20, 22, 20, 16, 13, 12, 14, 15, 13, 12, 13, 10, 13, 14, 15, 16, 16, 17, 18, 18, 18, 19, 19, 18, 17, 16, 16, 17, 19, 19, 19, 18, 17, 19, 19, 17, 16, 15, 15, 15, 16, 17, 16, 15, 16, 16, 17, 17, 17, 17, 18, 18, 19, 19, 19, 19, 20, 18, 16, 16, 18, 19, 17, 16, 16, 18, 20, 19, 19, 19, 19, 19, 19, 19, 19, 19, 19, 19, 18, 18, 17, 17, 17, 17, 17, 17, 23, 23, 23, 22, 19, 17, 17, 16, 16, 16, 15, 16, 18, 18, 12, 13, 15, 18, 19, 20, 20, 15, 19, 23, 24, 24, 23, 25, 22, 23, 22, 22, 21, 21, 21, 19, 19, 18, 16, 15, 14, 14, 18, 18, 17, 15, 13, 11, 9, 9, 9, 13, 10, 12, 13, 15, 15, 13, 14, 15, 15, 17, 18, 18, 18, 17, 17, 16, 15, 14, 14, 11, 7, 4, 4, 7, 11, 12, 4, 6, 25, 44, 75, 90, 56, 40, 26, 14, 22, 16, 13, 10, 15, 14, 16, 18, 18, 16, 18, 21, 31, 27, 21, 20, 27, 36, 43, 51, 58, 69, 84, 99, 115, 126, 138, 139, 156, 169, 176, 182, 162, 135, 160, 197, 191, 169, 140, 140, 164, 192, 190, 148, 122, 173, 195, 181, 146, 115, 107, 121, 133, 117, 98, 89, 64, 44, 43, 42, 40, 52, 61, 72, 89, 104, 114, 118, 116, 112, 105, 98, 91, 85, 79, 68, 56, 52, 63, 78, 77, 62, 41, 29, 20, 15, 19, 24, 28, 20, 14, 11, 11, 13, 10, 11, 13, 10, 15, 18, 19, 18, 18, 18, 18, 17, 18, 18, 17, 17, 15, 13, 13, 14, 15, 15, 16, 16, 17, 18, 17, 17, 17, 17, 18, 19, 21, 21, 20, 18, 17, 16, 16, 17, 17, 17, 18, 18, 19, 19, 19, 19, 20, 18, 16, 16, 18, 19, 17, 16, 16, 18, 20, 19, 19, 19, 19, 19, 19, 19, 19, 19, 19, 19, 18, 18, 17, 17, 17, 17, 17, 17, 25, 24, 23, 22, 20, 17, 16, 16, 17, 17, 16, 18, 18, 19, 14, 15, 16, 18, 19, 19, 19, 15, 20, 24, 24, 21, 21, 23, 23, 23, 22, 22, 21, 21, 21, 17, 17, 16, 14, 14, 14, 14, 18, 18, 17, 16, 15, 13, 12, 12, 12, 12, 13, 15, 16, 16, 12, 12, 13, 14, 15, 16, 17, 15, 15, 15, 15, 14, 14, 14, 21, 20, 19, 21, 23, 22, 21, 11, 28, 51, 69, 85, 71, 47, 35, 27, 36, 34, 39, 36, 36, 29, 34, 40, 39, 39, 44, 52, 71, 80, 95, 117, 140, 157, 166, 188, 204, 221, 227, 224, 220, 219, 214, 208, 208, 208, 205, 198, 183, 151, 160, 196, 212, 212, 185, 182, 176, 175, 179, 162, 157, 188, 172, 133, 159, 216, 227, 210, 217, 218, 229, 234, 213, 195, 196, 196, 193, 192, 196, 200, 204, 205, 203, 202, 189, 184, 186, 187, 188, 186, 183, 168, 164, 159, 138, 115, 106, 110, 88, 62, 38, 24, 20, 22, 21, 28, 27, 22, 18, 14, 14, 14, 20, 23, 23, 21, 21, 20, 19, 17, 18, 17, 17, 15, 14, 12, 13, 10, 13, 10, 11, 14, 15, 15, 15, 16, 16, 16, 18, 19, 20, 22, 24, 24, 22, 20, 18, 17, 16, 16, 17, 17, 18, 18, 19, 19, 19, 19, 20, 18, 16, 16, 18, 19, 17, 16, 16, 18, 20, 19, 19, 19, 19, 19, 19, 19, 19, 19, 19, 19, 18, 18, 17, 17, 17, 17, 17, 17, 20, 21, 21, 20, 19, 17, 16, 17, 18, 18, 18, 19, 19, 20, 17, 18, 18, 18, 19, 18, 17, 16, 22, 25, 23, 19, 18, 21, 20, 20, 20, 19, 18, 17, 17, 15, 16, 16, 14, 15, 15, 15, 16, 17, 17, 18, 18, 19, 19, 18, 18, 18, 18, 18, 18, 18, 15, 15, 15, 16, 17, 17, 18, 17, 17, 16, 15, 14, 13, 13, 30, 32, 35, 37, 37, 33, 30, 43, 73, 82, 83, 77, 60, 84, 87, 83, 116, 103, 126, 140, 152, 159, 162, 169, 178, 186, 195, 200, 199, 198, 198, 200, 202, 201, 198, 190, 191, 193, 192, 189, 186, 184, 187, 194, 191, 191, 192, 189, 202, 187, 189, 190, 169, 171, 173, 188, 168, 167, 179, 181, 167, 135, 155, 190, 160, 155, 168, 162, 167, 163, 167, 190, 199, 193, 195, 193, 192, 190, 192, 193, 190, 185, 185, 189, 189, 186, 185, 184, 186, 186, 186, 197, 200, 196, 194, 191, 182, 172, 157, 139, 110, 78, 50, 32, 22, 25, 28, 25, 25, 23, 22, 21, 26, 27, 26, 26, 25, 24, 23, 20, 18, 17, 17, 15, 13, 12, 9, 9, 11, 12, 13, 14, 15, 16, 17, 16, 16, 17, 18, 18, 21, 22, 20, 18, 17, 17, 16, 17, 17, 17, 18, 18, 19, 19, 19, 19, 20, 18, 16, 16, 18, 19, 17, 16, 16, 18, 20, 19, 19, 19, 19, 19, 19, 19, 19, 19, 19, 19, 18, 18, 17, 17, 17, 17, 17, 17, 20, 20, 21, 20, 20, 19, 19, 20, 19, 18, 17, 18, 19, 21, 18, 20, 21, 21, 19, 18, 18, 21, 21, 21, 21, 21, 23, 26, 22, 22, 22, 20, 18, 16, 15, 14, 16, 17, 15, 14, 15, 17, 16, 20, 11, 20, 28, 18, 26, 22, 13, 10, 25, 36, 24, 28, 16, 21, 17, 12, 12, 16, 18, 18, 20, 25, 24, 21, 22, 24, 23, 28, 33, 35, 31, 32, 44, 60, 90, 114, 139, 162, 180, 194, 216, 223, 219, 218, 208, 207, 208, 211, 211, 208, 206, 202, 198, 195, 193, 182, 181, 180, 180, 182, 185, 188, 185, 182, 182, 185, 188, 187, 183, 182, 186, 189, 190, 188, 185, 185, 189, 186, 187, 197, 207, 196, 175, 130, 146, 171, 199, 199, 154, 146, 168, 177, 185, 186, 180, 183, 140, 113, 190, 181, 178, 181, 185, 180, 177, 181, 187, 188, 186, 184, 184, 183, 180, 178, 180, 185, 188, 187, 187, 191, 196, 198, 197, 198, 201, 194, 188, 187, 178, 150, 100, 50, 30, 29, 29, 27, 24, 24, 27, 22, 23, 30, 31, 26, 22, 20, 23, 22, 20, 22, 18, 12, 13, 14, 13, 10, 9, 18, 23, 19, 14, 17, 17, 12, 13, 17, 18, 17, 17, 17, 18, 20, 21, 20, 18, 19, 19, 18, 20, 21, 20, 17, 15, 16, 20, 20, 17, 16, 18, 19, 18, 16, 15, 16, 17, 18, 20, 18, 15, 15, 18, 20, 19, 18, 18, 18, 19, 20, 20, 18, 17, 17, 18, 19, 22, 22, 22, 21, 21, 21, 21, 21, 20, 18, 16, 18, 19, 21, 18, 20, 21, 20, 18, 18, 19, 24, 22, 20, 19, 19, 20, 21, 18, 19, 20, 19, 18, 17, 16, 15, 16, 17, 15, 14, 15, 17, 11, 22, 18, 12, 9, 9, 24, 36, 40, 15, 11, 13, 13, 10, 23, 23, 25, 28, 32, 33, 32, 30, 30, 28, 24, 26, 36, 43, 41, 54, 71, 96, 117, 142, 170, 194, 208, 210, 212, 210, 203, 196, 189, 175, 174, 177, 177, 176, 173, 172, 171, 171, 173, 174, 175, 175, 176, 175, 174, 172, 171, 170, 168, 166, 169, 170, 171, 172, 173, 173, 171, 176, 177, 178, 179, 181, 184, 185, 180, 177, 175, 169, 156, 136, 120, 139, 148, 139, 154, 173, 170, 187, 190, 172, 166, 184, 185, 178, 129, 99, 178, 174, 173, 170, 170, 172, 178, 182, 182, 175, 168, 168, 172, 178, 179, 179, 180, 181, 179, 178, 178, 180, 185, 188, 188, 191, 194, 192, 192, 195, 200, 199, 189, 176, 161, 127, 83, 61, 60, 58, 47, 44, 42, 37, 28, 25, 26, 31, 30, 23, 15, 15, 18, 23, 36, 28, 17, 19, 24, 22, 14, 13, 10, 18, 23, 24, 22, 18, 16, 15, 17, 18, 17, 19, 21, 21, 19, 20, 19, 18, 19, 21, 20, 17, 15, 17, 20, 20, 18, 17, 18, 18, 17, 17, 16, 16, 17, 17, 18, 17, 16, 17, 18, 19, 19, 19, 18, 18, 19, 21, 20, 18, 17, 18, 19, 20, 23, 23, 23, 22, 21, 21, 21, 21, 20, 18, 16, 17, 19, 21, 18, 19, 21, 19, 19, 19, 20, 22, 21, 20, 20, 19, 19, 20, 16, 18, 19, 19, 19, 19, 18, 16, 18, 18, 16, 15, 15, 17, 19, 18, 18, 18, 24, 31, 28, 18, 33, 40, 39, 33, 29, 24, 28, 27, 24, 23, 27, 38, 48, 64, 94, 128, 145, 154, 163, 174, 167, 164, 161, 159, 156, 152, 148, 138, 132, 126, 122, 122, 122, 121, 121, 121, 121, 122, 123, 124, 124, 127, 128, 128, 128, 128, 128, 127, 131, 130, 130, 133, 137, 136, 130, 130, 134, 139, 140, 138, 136, 137, 139, 139, 138, 138, 140, 144, 147, 142, 124, 103, 101, 115, 132, 140, 119, 108, 91, 96, 105, 98, 101, 104, 91, 95, 121, 115, 109, 92, 91, 135, 123, 129, 135, 128, 124, 122, 124, 129, 131, 132, 134, 136, 143, 144, 144, 149, 153, 155, 154, 157, 163, 167, 172, 176, 181, 185, 181, 180, 181, 181, 181, 188, 198, 189, 188, 194, 190, 179, 171, 170, 170, 160, 141, 121, 102, 78, 57, 33, 22, 22, 24, 24, 21, 22, 26, 23, 22, 23, 23, 20, 20, 15, 15, 20, 21, 19, 18, 20, 20, 19, 17, 16, 19, 20, 20, 20, 19, 19, 19, 20, 19, 18, 17, 18, 19, 19, 18, 17, 17, 16, 16, 17, 18, 18, 17, 16, 14, 16, 19, 20, 18, 18, 18, 19, 18, 18, 19, 21, 20, 18, 17, 17, 19, 20, 23, 23, 23, 22, 22, 22, 22, 21, 20, 18, 16, 17, 19, 21, 18, 19, 20, 19, 18, 20, 22, 20, 20, 20, 22, 22, 23, 24, 21, 21, 22, 21, 20, 19, 18, 17, 19, 19, 16, 15, 16, 17, 24, 20, 20, 19, 23, 35, 38, 36, 30, 31, 25, 30, 57, 71, 87, 93, 104, 120, 144, 175, 198, 212, 209, 204, 198, 183, 157, 134, 105, 100, 97, 101, 109, 118, 125, 124, 124, 124, 119, 118, 123, 131, 127, 123, 117, 114, 113, 116, 119, 118, 118, 120, 121, 123, 124, 125, 130, 130, 128, 132, 135, 132, 126, 124, 129, 137, 138, 137, 137, 138, 139, 139, 136, 131, 126, 122, 119, 123, 121, 120, 123, 125, 119, 109, 106, 117, 124, 119, 113, 112, 126, 126, 109, 91, 94, 91, 105, 108, 107, 112, 94, 94, 102, 92, 85, 84, 83, 84, 94, 104, 105, 100, 86, 76, 74, 88, 107, 118, 119, 126, 130, 131, 133, 133, 136, 140, 152, 160, 167, 171, 172, 174, 177, 175, 173, 173, 172, 175, 182, 188, 182, 174, 176, 193, 207, 196, 168, 149, 125, 83, 43, 24, 23, 29, 33, 34, 32, 28, 29, 31, 32, 30, 27, 22, 20, 21, 20, 19, 20, 19, 16, 16, 18, 20, 21, 20, 19, 19, 19, 18, 19, 19, 20, 19, 18, 18, 18, 18, 17, 16, 16, 17, 19, 19, 17, 16, 14, 16, 20, 21, 18, 17, 19, 19, 18, 18, 19, 21, 20, 18, 17, 17, 19, 20, 22, 22, 22, 21, 21, 21, 21, 21, 20, 18, 16, 18, 19, 21, 18, 19, 19, 18, 18, 20, 23, 18, 19, 21, 23, 24, 25, 25, 21, 22, 22, 22, 21, 19, 19, 18, 20, 20, 17, 15, 15, 17, 23, 22, 24, 32, 33, 26, 29, 51, 66, 58, 95, 149, 161, 194, 199, 200, 202, 201, 195, 189, 185, 157, 137, 118, 104, 96, 92, 92, 90, 96, 106, 109, 103, 93, 84, 71, 75, 77, 70, 60, 52, 50, 51, 52, 54, 56, 56, 55, 55, 55, 55, 56, 55, 54, 54, 53, 58, 57, 58, 62, 65, 65, 63, 63, 65, 68, 71, 72, 72, 72, 73, 77, 85, 93, 99, 102, 103, 97, 104, 111, 106, 98, 98, 106, 118, 114, 108, 110, 118, 121, 111, 118, 129, 130, 127, 113, 119, 122, 113, 113, 120, 112, 119, 120, 132, 139, 132, 121, 118, 121, 121, 117, 121, 115, 104, 101, 103, 99, 91, 89, 93, 96, 100, 104, 110, 117, 114, 114, 118, 122, 125, 128, 132, 139, 141, 143, 150, 157, 158, 154, 158, 170, 184, 187, 181, 182, 191, 203, 207, 199, 180, 151, 114, 79, 56, 49, 45, 34, 27, 25, 23, 26, 24, 19, 17, 20, 23, 21, 19, 18, 17, 17, 20, 20, 19, 18, 19, 20, 19, 18, 18, 21, 22, 21, 17, 17, 17, 18, 16, 16, 17, 17, 17, 17, 17, 17, 16, 17, 18, 18, 18, 18, 18, 19, 18, 18, 19, 21, 20, 18, 17, 18, 19, 20, 21, 21, 21, 21, 20, 20, 20, 21, 20, 18, 16, 18, 19, 21, 18, 19, 18, 17, 18, 21, 24, 18, 19, 21, 22, 22, 21, 21, 17, 18, 19, 20, 20, 21, 21, 19, 21, 20, 17, 15, 15, 17, 18, 25, 21, 34, 56, 93, 165, 186, 151, 138, 174, 211, 200, 193, 157, 144, 131, 120, 112, 105, 99, 95, 81, 69, 65, 60, 55, 56, 66, 65, 63, 64, 67, 71, 74, 82, 82, 81, 81, 81, 81, 81, 86, 87, 88, 88, 89, 88, 87, 89, 90, 90, 90, 91, 91, 92, 77, 74, 72, 70, 68, 67, 67, 66, 64, 62, 63, 65, 65, 62, 60, 60, 61, 61, 59, 55, 53, 54, 55, 56, 56, 55, 54, 52, 55, 56, 60, 57, 57, 65, 60, 54, 51, 48, 63, 57, 55, 51, 54, 49, 61, 46, 52, 51, 54, 53, 55, 56, 55, 54, 54, 57, 53, 54, 59, 60, 59, 58, 57, 61, 64, 68, 71, 76, 83, 89, 89, 93, 100, 104, 108, 118, 130, 131, 131, 133, 133, 129, 123, 118, 125, 128, 124, 119, 120, 133, 149, 151, 154, 160, 168, 181, 189, 185, 178, 173, 153, 114, 75, 47, 30, 25, 26, 27, 25, 21, 18, 19, 18, 17, 17, 20, 21, 21, 18, 17, 18, 20, 18, 16, 18, 22, 24, 21, 17, 16, 17, 18, 16, 17, 18, 16, 15, 15, 17, 18, 19, 18, 15, 15, 18, 20, 19, 19, 18, 18, 19, 21, 20, 18, 17, 18, 19, 20, 14, 15, 16, 18, 18, 18, 19, 16, 18, 19, 21, 23, 24, 25, 22, 22, 22, 22, 21, 21, 21, 20, 19, 19, 19, 20, 18, 16, 20, 21, 21, 19, 15, 15, 16, 13, 10, 19, 15, 13, 25, 22, 23, 33, 41, 58, 114, 181, 215, 181, 136, 176, 194, 197, 188, 148, 113, 119, 112, 108, 107, 97, 78, 63, 59, 57, 54, 55, 59, 66, 72, 72, 78, 87, 94, 98, 107, 116, 116, 112, 105, 104, 105, 105, 105, 101, 99, 100, 100, 102, 104, 106, 105, 106, 104, 107, 109, 110, 111, 104, 103, 104, 104, 103, 102, 101, 104, 107, 107, 104, 100, 98, 97, 102, 105, 106, 104, 102, 102, 106, 102, 99, 97, 96, 97, 99, 101, 94, 92, 94, 98, 99, 97, 97, 93, 95, 102, 102, 94, 86, 82, 84, 90, 93, 89, 84, 85, 92, 92, 90, 86, 80, 75, 73, 74, 62, 52, 44, 42, 46, 46, 44, 43, 43, 42, 44, 45, 46, 44, 43, 43, 43, 48, 57, 66, 73, 79, 89, 105, 118, 129, 142, 155, 159, 147, 131, 127, 128, 117, 97, 92, 96, 103, 114, 127, 139, 147, 167, 177, 186, 200, 192, 144, 84, 38, 21, 13, 19, 26, 15, 8, 15, 27, 27, 9, 12, 25, 24, 19, 14, 8, 13, 10, 18, 20, 18, 16, 16, 16, 16, 16, 17, 18, 19, 18, 17, 16, 16, 18, 19, 20, 19, 17, 17, 19, 20, 19, 19, 20, 20, 20, 20, 20, 20, 19, 18, 18, 18, 17, 18, 19, 20, 20, 19, 21, 16, 18, 20, 22, 23, 24, 24, 22, 22, 22, 21, 21, 21, 21, 20, 19, 19, 19, 20, 18, 16, 19, 20, 20, 18, 15, 15, 16, 7, 20, 16, 12, 28, 30, 34, 22, 75, 125, 170, 175, 164, 153, 190, 197, 182, 145, 116, 108, 114, 122, 98, 75, 66, 64, 62, 62, 71, 74, 78, 84, 90, 96, 99, 96, 100, 103, 103, 103, 106, 111, 111, 107, 103, 100, 101, 100, 100, 100, 100, 101, 102, 105, 107, 109, 109, 109, 107, 108, 109, 109, 109, 104, 104, 104, 104, 103, 102, 102, 99, 101, 104, 106, 106, 108, 109, 112, 113, 112, 108, 104, 104, 107, 110, 110, 108, 108, 109, 110, 112, 104, 103, 105, 108, 109, 108, 108, 108, 110, 114, 113, 107, 100, 97, 98, 99, 101, 103, 103, 101, 99, 95, 95, 97, 99, 101, 103, 105, 102, 95, 88, 86, 87, 86, 83, 77, 74, 70, 68, 67, 65, 62, 55, 51, 49, 46, 45, 44, 43, 43, 46, 52, 55, 56, 58, 60, 62, 72, 90, 100, 105, 113, 124, 127, 125, 121, 117, 113, 111, 110, 114, 133, 150, 156, 177, 196, 189, 154, 102, 69, 50, 26, 32, 34, 19, 18, 24, 23, 19, 16, 16, 17, 19, 19, 20, 18, 16, 14, 16, 17, 16, 16, 17, 18, 19, 20, 19, 18, 16, 17, 18, 19, 21, 19, 17, 17, 19, 20, 19, 19, 20, 20, 20, 20, 20, 20, 19, 18, 18, 18, 16, 16, 17, 18, 18, 19, 19, 18, 19, 21, 22, 23, 23, 23, 22, 22, 22, 21, 21, 21, 21, 20, 19, 19, 19, 20, 19, 16, 18, 19, 19, 18, 15, 15, 17, 16, 18, 20, 17, 20, 16, 28, 70, 159, 178, 175, 179, 180, 174, 149, 123, 116, 105, 87, 80, 69, 68, 68, 77, 90, 94, 90, 86, 97, 99, 100, 101, 102, 100, 99, 91, 95, 98, 100, 103, 106, 110, 108, 105, 100, 98, 97, 96, 95, 97, 97, 99, 101, 103, 106, 108, 110, 108, 106, 107, 108, 108, 108, 105, 105, 105, 105, 103, 102, 101, 100, 102, 101, 98, 95, 92, 91, 97, 97, 96, 95, 95, 98, 101, 107, 107, 106, 106, 107, 108, 109, 104, 103, 105, 108, 109, 108, 108, 109, 109, 109, 107, 102, 98, 97, 101, 102, 99, 98, 96, 91, 84, 83, 84, 85, 89, 94, 99, 102, 102, 99, 97, 98, 102, 103, 102, 98, 97, 96, 98, 101, 102, 102, 97, 95, 95, 92, 86, 81, 77, 78, 73, 63, 55, 52, 55, 58, 53, 50, 47, 43, 43, 50, 60, 67, 70, 73, 80, 88, 96, 103, 115, 112, 107, 121, 136, 137, 137, 145, 155, 145, 129, 108, 65, 35, 28, 17, 12, 25, 28, 19, 19, 18, 16, 19, 19, 15, 13, 13, 16, 18, 18, 18, 18, 19, 20, 20, 20, 19, 17, 17, 18, 19, 20, 20, 17, 17, 19, 20, 20, 19, 20, 20, 20, 20, 20, 20, 19, 18, 18, 18, 16, 17, 17, 17, 19, 18, 18, 20, 20, 22, 23, 23, 23, 22, 22, 22, 22, 21, 21, 21, 21, 20, 19, 19, 19, 20, 19, 16, 16, 17, 18, 17, 16, 17, 19, 30, 11, 17, 23, 24, 33, 83, 122, 207, 208, 166, 128, 111, 112, 108, 81, 72, 60, 48, 61, 75, 96, 101, 108, 111, 105, 99, 100, 103, 102, 100, 99, 99, 100, 101, 99, 100, 101, 102, 101, 102, 103, 106, 103, 99, 98, 96, 95, 93, 94, 94, 95, 97, 99, 102, 104, 105, 104, 102, 104, 106, 108, 107, 106, 106, 106, 106, 104, 103, 102, 99, 101, 102, 99, 96, 94, 94, 101, 100, 97, 94, 94, 94, 94, 98, 99, 99, 99, 100, 100, 101, 100, 101, 101, 103, 104, 105, 106, 106, 103, 100, 98, 95, 92, 91, 93, 95, 96, 93, 91, 91, 93, 93, 89, 85, 85, 90, 96, 99, 104, 105, 104, 103, 103, 101, 99, 104, 105, 103, 103, 105, 105, 102, 100, 103, 108, 107, 105, 104, 104, 109, 105, 94, 86, 86, 89, 93, 94, 93, 93, 92, 88, 81, 74, 70, 66, 61, 54, 49, 46, 43, 41, 59, 79, 78, 91, 118, 131, 125, 108, 120, 134, 125, 150, 161, 111, 55, 18, 17, 24, 19, 17, 20, 19, 15, 14, 13, 15, 14, 17, 19, 18, 18, 19, 20, 21, 22, 21, 19, 18, 17, 18, 19, 20, 19, 17, 17, 19, 20, 19, 19, 20, 20, 20, 20, 20, 20, 19, 18, 18, 18, 18, 20, 21, 21, 21, 21, 20, 21, 22, 22, 23, 23, 22, 22, 22, 22, 22, 21, 21, 21, 21, 20, 19, 19, 19, 20, 18, 16, 14, 16, 18, 17, 16, 19, 21, 25, 15, 30, 30, 30, 47, 108, 137, 192, 171, 127, 116, 114, 82, 71, 65, 66, 77, 87, 92, 95, 109, 108, 108, 108, 104, 101, 103, 108, 105, 101, 97, 95, 96, 98, 100, 100, 100, 101, 101, 101, 101, 102, 100, 97, 97, 96, 95, 94, 96, 96, 97, 98, 100, 102, 104, 104, 103, 102, 103, 106, 106, 106, 104, 104, 104, 104, 102, 100, 99, 100, 101, 101, 99, 95, 94, 93, 97, 97, 97, 98, 101, 101, 99, 97, 97, 98, 98, 99, 99, 99, 101, 102, 101, 104, 105, 106, 107, 108, 104, 100, 99, 97, 94, 91, 93, 95, 94, 92, 91, 91, 92, 92, 88, 84, 85, 90, 94, 94, 97, 101, 103, 105, 105, 104, 103, 99, 98, 97, 99, 101, 102, 101, 95, 95, 98, 97, 95, 96, 100, 102, 104, 106, 104, 101, 99, 98, 100, 104, 108, 105, 100, 102, 110, 108, 103, 98, 92, 88, 85, 84, 74, 59, 49, 51, 54, 57, 64, 84, 103, 112, 116, 125, 133, 136, 130, 108, 73, 42, 28, 22, 17, 22, 24, 20, 17, 15, 15, 14, 18, 20, 19, 19, 20, 21, 22, 23, 22, 20, 18, 18, 18, 19, 20, 19, 17, 17, 19, 20, 19, 19, 20, 20, 20, 20, 20, 20, 19, 18, 18, 18, 18, 19, 19, 20, 20, 19, 18, 22, 22, 23, 24, 23, 22, 22, 22, 22, 22, 22, 21, 21, 21, 20, 19, 19, 19, 20, 18, 16, 13, 15, 18, 17, 18, 21, 23, 27, 26, 31, 20, 44, 103, 184, 117, 124, 109, 87, 72, 80, 74, 68, 93, 98, 99, 102, 100, 114, 126, 113, 105, 108, 109, 106, 102, 105, 104, 102, 99, 98, 98, 99, 107, 106, 105, 104, 103, 101, 99, 98, 96, 94, 95, 95, 95, 94, 101, 102, 102, 103, 104, 105, 106, 108, 107, 105, 105, 106, 105, 104, 103, 103, 103, 102, 100, 98, 96, 98, 100, 102, 101, 99, 98, 99, 101, 99, 100, 102, 103, 100, 96, 93, 93, 94, 95, 95, 95, 95, 98, 98, 98, 100, 101, 102, 104, 102, 98, 95, 94, 94, 90, 85, 88, 86, 86, 93, 101, 101, 95, 93, 90, 88, 91, 95, 94, 89, 89, 92, 96, 96, 93, 90, 87, 91, 92, 91, 94, 96, 97, 96, 96, 98, 98, 94, 90, 92, 100, 98, 99, 105, 104, 100, 100, 104, 110, 112, 110, 108, 104, 101, 100, 106, 108, 104, 101, 99, 99, 99, 94, 96, 99, 93, 88, 85, 80, 68, 57, 63, 65, 60, 88, 105, 108, 127, 132, 100, 62, 44, 29, 17, 17, 22, 22, 15, 13, 17, 20, 21, 20, 20, 20, 21, 22, 24, 23, 21, 19, 18, 18, 19, 20, 20, 17, 17, 19, 20, 20, 20, 20, 20, 20, 20, 20, 20, 19, 18, 18, 18, 26, 24, 23, 21, 19, 19, 19, 20, 19, 18, 20, 22, 22, 21, 22, 21, 20, 21, 22, 22, 21, 20, 19, 18, 19, 20, 18, 16, 16, 13, 18, 19, 26, 33, 11, 19, 50, 27, 49, 135, 185, 154, 90, 94, 84, 66, 64, 80, 95, 98, 96, 95, 98, 104, 109, 109, 112, 111, 110, 108, 107, 105, 104, 106, 105, 105, 104, 105, 105, 106, 110, 108, 104, 103, 104, 107, 110, 109, 107, 102, 101, 100, 102, 103, 106, 107, 107, 107, 107, 107, 107, 107, 107, 106, 105, 103, 103, 102, 101, 100, 101, 103, 101, 101, 105, 105, 102, 101, 105, 106, 104, 105, 107, 107, 107, 105, 103, 101, 99, 95, 92, 91, 92, 93, 92, 91, 88, 89, 91, 95, 96, 99, 102, 102, 99, 98, 94, 91, 88, 87, 87, 89, 91, 92, 97, 101, 98, 97, 101, 101, 94, 90, 88, 85, 78, 76, 77, 81, 85, 87, 88, 86, 82, 79, 83, 91, 95, 94, 95, 94, 92, 91, 91, 90, 87, 87, 92, 99, 102, 100, 100, 101, 108, 110, 107, 104, 102, 101, 101, 102, 101, 99, 100, 103, 105, 104, 103, 102, 105, 107, 108, 109, 108, 104, 98, 91, 86, 82, 73, 62, 58, 66, 82, 97, 101, 87, 60, 40, 29, 23, 23, 21, 18, 21, 25, 22, 15, 12, 17, 20, 18, 18, 20, 19, 18, 18, 18, 18, 19, 19, 19, 19, 19, 19, 19, 18, 15, 15, 17, 21, 23, 22, 20, 19, 19, 19, 23, 22, 22, 20, 21, 21, 21, 20, 19, 18, 20, 22, 22, 21, 22, 21, 20, 21, 22, 22, 21, 20, 19, 19, 19, 20, 18, 16, 20, 18, 21, 25, 25, 22, 25, 30, 31, 85, 154, 169, 151, 101, 73, 58, 59, 76, 90, 94, 96, 93, 91, 91, 95, 99, 103, 105, 110, 110, 109, 109, 108, 107, 107, 108, 107, 107, 107, 107, 107, 108, 111, 107, 104, 101, 99, 99, 100, 102, 101, 100, 100, 101, 102, 103, 105, 106, 106, 105, 104, 104, 104, 103, 104, 104, 105, 104, 105, 105, 105, 103, 104, 105, 102, 102, 106, 108, 104, 104, 108, 108, 107, 107, 105, 105, 106, 107, 107, 107, 106, 104, 101, 98, 97, 97, 94, 92, 89, 89, 91, 94, 96, 98, 100, 102, 101, 101, 99, 97, 94, 94, 92, 94, 95, 95, 99, 102, 99, 97, 101, 102, 97, 95, 95, 93, 87, 84, 84, 85, 86, 87, 87, 88, 85, 82, 83, 88, 90, 88, 92, 92, 91, 91, 92, 92, 91, 90, 93, 98, 100, 99, 99, 100, 103, 103, 100, 98, 96, 96, 96, 97, 97, 95, 96, 98, 100, 99, 97, 97, 98, 99, 101, 103, 104, 107, 111, 115, 115, 109, 99, 91, 76, 63, 57, 55, 74, 94, 103, 89, 62, 36, 25, 26, 22, 16, 13, 16, 21, 22, 18, 16, 18, 20, 20, 19, 18, 18, 18, 18, 18, 18, 19, 20, 21, 22, 23, 23, 21, 19, 19, 19, 19, 17, 16, 17, 16, 16, 31, 29, 27, 25, 23, 22, 22, 20, 19, 18, 20, 22, 22, 21, 22, 21, 20, 21, 22, 22, 21, 20, 19, 19, 19, 20, 19, 16, 13, 10, 30, 29, 31, 35, 30, 39, 96, 146, 163, 161, 113, 64, 61, 68, 71, 83, 92, 91, 89, 95, 92, 92, 92, 93, 95, 98, 100, 106, 107, 107, 107, 108, 108, 109, 109, 109, 108, 107, 107, 108, 109, 108, 108, 106, 105, 104, 103, 103, 105, 106, 106, 107, 106, 106, 106, 108, 108, 108, 108, 107, 106, 106, 104, 105, 105, 106, 107, 108, 108, 110, 108, 108, 108, 105, 104, 108, 110, 106, 106, 110, 111, 109, 109, 107, 107, 108, 110, 111, 111, 111, 109, 106, 104, 102, 101, 99, 97, 94, 93, 92, 95, 98, 99, 99, 102, 102, 103, 103, 102, 100, 99, 99, 101, 101, 99, 102, 104, 100, 99, 103, 105, 100, 99, 100, 99, 92, 91, 91, 90, 89, 88, 89, 90, 88, 86, 87, 91, 93, 93, 89, 87, 85, 86, 88, 88, 86, 84, 85, 89, 92, 95, 98, 99, 100, 99, 97, 95, 94, 94, 94, 96, 95, 94, 96, 100, 102, 103, 100, 99, 99, 99, 100, 104, 107, 107, 102, 98, 104, 116, 121, 116, 107, 99, 87, 75, 73, 73, 67, 72, 76, 68, 55, 39, 28, 27, 30, 24, 13, 14, 19, 19, 16, 18, 20, 19, 18, 18, 18, 18, 18, 18, 19, 20, 20, 21, 21, 21, 21, 20, 19, 19, 18, 16, 17, 17, 17, 17, 31, 30, 28, 25, 24, 23, 23, 22, 19, 18, 20, 22, 22, 21, 22, 21, 20, 21, 22, 22, 21, 20, 19, 19, 19, 20, 18, 16, 20, 27, 25, 26, 36, 73, 138, 216, 181, 112, 77, 66, 63, 57, 81, 98, 103, 91, 85, 86, 87, 84, 87, 89, 92, 94, 98, 101, 104, 104, 105, 106, 107, 107, 108, 108, 108, 107, 107, 107, 107, 108, 112, 110, 108, 105, 105, 104, 104, 102, 105, 108, 111, 113, 115, 116, 114, 114, 113, 113, 113, 112, 111, 111, 109, 109, 108, 108, 108, 108, 111, 109, 109, 110, 107, 106, 110, 111, 106, 106, 110, 111, 109, 110, 111, 111, 112, 112, 112, 111, 111, 108, 106, 104, 104, 105, 105, 103, 101, 98, 96, 98, 101, 101, 100, 100, 100, 103, 104, 103, 100, 99, 101, 104, 104, 102, 104, 106, 102, 101, 106, 106, 102, 99, 99, 97, 94, 95, 96, 96, 93, 94, 96, 96, 94, 92, 92, 93, 94, 95, 95, 94, 92, 92, 93, 91, 90, 89, 89, 89, 91, 95, 97, 99, 100, 100, 98, 97, 97, 98, 99, 100, 100, 98, 98, 99, 100, 99, 99, 98, 98, 98, 100, 102, 104, 105, 110, 116, 114, 107, 105, 109, 110, 111, 113, 107, 101, 88, 71, 61, 69, 83, 88, 75, 51, 27, 23, 22, 16, 20, 21, 17, 16, 19, 20, 19, 18, 18, 18, 18, 19, 20, 19, 18, 17, 16, 16, 16, 16, 18, 19, 19, 20, 22, 22, 21, 21, 21, 28, 27, 26, 26, 24, 25, 24, 22, 19, 18, 20, 22, 22, 20, 22, 21, 20, 21, 22, 22, 21, 20, 19, 18, 19, 20, 18, 16, 24, 23, 30, 45, 72, 120, 165, 172, 123, 85, 60, 41, 60, 63, 91, 94, 91, 86, 87, 87, 83, 82, 85, 89, 93, 95, 99, 104, 104, 105, 106, 107, 107, 108, 109, 109, 108, 108, 107, 107, 108, 109, 114, 111, 106, 104, 102, 103, 105, 104, 106, 108, 111, 115, 118, 121, 116, 115, 113, 113, 113, 112, 111, 111, 110, 109, 108, 107, 107, 106, 110, 108, 109, 110, 108, 107, 111, 112, 108, 108, 112, 113, 111, 112, 111, 112, 112, 113, 112, 112, 111, 109, 107, 106, 107, 109, 109, 107, 104, 100, 97, 99, 102, 101, 98, 99, 100, 103, 104, 103, 100, 98, 102, 105, 105, 103, 106, 107, 104, 103, 107, 108, 103, 100, 100, 98, 98, 102, 104, 103, 99, 99, 102, 103, 102, 101, 99, 98, 98, 100, 103, 104, 101, 102, 103, 103, 101, 103, 101, 97, 98, 100, 103, 103, 102, 101, 100, 98, 99, 100, 102, 103, 102, 100, 98, 98, 98, 97, 99, 100, 101, 101, 101, 100, 100, 98, 98, 102, 110, 117, 118, 113, 110, 110, 109, 104, 103, 105, 101, 78, 60, 60, 71, 87, 82, 54, 27, 16, 22, 29, 23, 14, 16, 21, 20, 19, 18, 18, 18, 18, 19, 19, 19, 18, 17, 16, 16, 16, 18, 20, 20, 18, 18, 20, 21, 20, 21, 21, 35, 33, 31, 28, 26, 24, 23, 22, 19, 18, 20, 22, 21, 20, 22, 21, 20, 21, 22, 22, 21, 20, 19, 19, 19, 20, 19, 18, 28, 31, 32, 57, 136, 189, 151, 115, 93, 49, 57, 73, 72, 78, 93, 85, 84, 87, 82, 79, 87, 91, 94, 97, 97, 97, 99, 102, 107, 108, 108, 109, 109, 109, 110, 110, 109, 110, 109, 109, 110, 111, 111, 109, 106, 105, 106, 109, 113, 115, 115, 114, 114, 114, 116, 119, 114, 113, 112, 111, 111, 110, 108, 108, 107, 107, 106, 106, 106, 105, 108, 107, 108, 110, 108, 108, 112, 114, 110, 110, 114, 114, 113, 114, 111, 110, 110, 111, 111, 111, 109, 107, 105, 103, 106, 106, 105, 106, 104, 100, 98, 99, 103, 101, 98, 99, 101, 104, 106, 104, 100, 97, 100, 104, 105, 104, 106, 107, 104, 104, 108, 109, 105, 103, 104, 102, 105, 109, 111, 108, 103, 103, 107, 107, 107, 107, 107, 108, 110, 114, 107, 102, 101, 103, 105, 106, 105, 106, 104, 100, 100, 104, 108, 108, 103, 100, 98, 98, 99, 100, 102, 101, 100, 99, 100, 103, 105, 105, 107, 109, 108, 109, 108, 106, 104, 107, 113, 117, 112, 105, 105, 112, 111, 106, 102, 95, 95, 99, 99, 105, 94, 64, 50, 69, 92, 96, 63, 27, 14, 19, 25, 18, 15, 19, 20, 19, 17, 18, 18, 18, 19, 19, 19, 19, 19, 19, 19, 20, 23, 23, 21, 17, 14, 15, 17, 18, 18, 19, 31, 30, 29, 27, 26, 25, 25, 23, 22, 21, 21, 22, 21, 20, 22, 21, 21, 20, 19, 17, 17, 18, 21, 21, 17, 18, 24, 30, 24, 23, 60, 104, 130, 131, 102, 75, 75, 81, 90, 96, 94, 87, 75, 74, 74, 74, 77, 80, 83, 86, 89, 94, 97, 100, 103, 104, 104, 106, 107, 107, 107, 108, 110, 108, 110, 113, 112, 110, 109, 109, 109, 109, 110, 110, 109, 108, 107, 108, 109, 110, 111, 111, 110, 110, 116, 113, 109, 107, 108, 109, 108, 113, 113, 113, 112, 112, 111, 111, 110, 109, 109, 110, 110, 111, 112, 111, 110, 109, 109, 107, 105, 105, 110, 109, 103, 102, 88, 74, 69, 83, 105, 100, 117, 106, 79, 60, 67, 87, 108, 100, 108, 111, 121, 112, 115, 118, 115, 109, 102, 93, 92, 94, 102, 107, 103, 100, 106, 117, 118, 114, 109, 105, 107, 111, 111, 109, 103, 96, 99, 103, 100, 99, 97, 97, 101, 102, 106, 115, 113, 102, 101, 103, 101, 105, 105, 100, 107, 104, 96, 98, 99, 104, 108, 107, 105, 105, 106, 107, 108, 108, 108, 107, 108, 110, 112, 112, 112, 109, 105, 107, 111, 112, 108, 106, 104, 106, 104, 99, 105, 108, 104, 104, 100, 90, 86, 89, 91, 94, 91, 88, 86, 73, 67, 81, 90, 75, 39, 12, 24, 29, 24, 22, 20, 16, 12, 14, 17, 16, 19, 22, 22, 22, 19, 17, 15, 17, 19, 19, 19, 18, 18, 17, 17, 18, 19, 20, 25, 24, 24, 25, 25, 26, 27, 24, 22, 21, 22, 23, 22, 20, 23, 21, 21, 20, 19, 17, 17, 21, 22, 20, 19, 19, 21, 22, 17, 32, 76, 110, 111, 96, 74, 59, 77, 90, 95, 97, 93, 85, 78, 77, 75, 77, 80, 85, 89, 93, 94, 98, 99, 101, 101, 101, 104, 107, 108, 107, 106, 107, 109, 114, 116, 116, 114, 111, 110, 111, 111, 110, 110, 110, 110, 111, 111, 110, 111, 112, 113, 114, 113, 113, 118, 116, 112, 110, 110, 111, 110, 109, 109, 110, 112, 114, 115, 115, 112, 112, 111, 112, 114, 115, 117, 119, 119, 117, 114, 111, 110, 109, 118, 114, 101, 111, 73, 84, 134, 164, 201, 149, 173, 154, 159, 134, 68, 40, 71, 111, 104, 109, 121, 116, 126, 129, 113, 102, 103, 101, 106, 106, 105, 108, 108, 109, 114, 117, 110, 103, 108, 119, 123, 119, 103, 99, 102, 102, 104, 105, 101, 102, 102, 102, 104, 104, 105, 112, 109, 100, 101, 103, 101, 106, 106, 101, 108, 106, 98, 101, 102, 106, 112, 111, 111, 110, 109, 109, 109, 108, 107, 107, 107, 108, 109, 111, 113, 111, 108, 109, 112, 112, 109, 108, 104, 105, 105, 102, 108, 104, 99, 102, 103, 97, 89, 85, 79, 80, 87, 96, 100, 87, 65, 48, 62, 96, 86, 29, 11, 26, 23, 17, 22, 23, 15, 13, 17, 16, 16, 20, 20, 20, 19, 18, 16, 20, 23, 23, 22, 20, 19, 19, 18, 18, 19, 20, 29, 28, 26, 26, 25, 25, 25, 24, 23, 21, 22, 23, 22, 21, 22, 22, 21, 19, 19, 19, 18, 20, 19, 21, 26, 28, 27, 29, 30, 50, 88, 113, 107, 85, 69, 70, 87, 96, 92, 92, 91, 83, 77, 78, 76, 76, 80, 86, 91, 94, 96, 98, 100, 100, 101, 100, 106, 107, 108, 106, 104, 104, 106, 110, 111, 111, 110, 109, 111, 113, 111, 111, 110, 109, 110, 112, 114, 114, 114, 113, 112, 110, 108, 107, 111, 110, 107, 107, 110, 112, 113, 108, 107, 109, 110, 112, 113, 114, 110, 109, 110, 110, 112, 115, 117, 120, 123, 122, 118, 117, 117, 115, 114, 125, 109, 83, 70, 141, 180, 142, 149, 118, 118, 88, 127, 162, 171, 138, 104, 68, 99, 111, 118, 103, 119, 129, 118, 112, 113, 108, 115, 116, 115, 117, 117, 111, 104, 105, 111, 113, 109, 100, 99, 104, 101, 99, 96, 96, 100, 107, 112, 110, 109, 109, 109, 107, 107, 109, 105, 100, 103, 103, 100, 108, 107, 103, 110, 108, 100, 103, 102, 103, 108, 111, 113, 113, 112, 111, 111, 110, 109, 110, 109, 108, 109, 111, 113, 111, 109, 109, 111, 110, 108, 109, 105, 105, 106, 105, 110, 103, 96, 101, 106, 104, 99, 94, 87, 82, 79, 80, 88, 98, 89, 63, 40, 64, 98, 89, 54, 24, 21, 28, 23, 18, 19, 17, 15, 14, 17, 19, 20, 20, 21, 20, 20, 22, 25, 24, 23, 20, 19, 18, 17, 18, 19, 20, 27, 26, 25, 25, 25, 25, 26, 24, 23, 22, 23, 24, 23, 21, 24, 23, 21, 19, 19, 20, 20, 23, 19, 23, 30, 29, 28, 31, 59, 92, 108, 99, 82, 76, 87, 99, 98, 93, 89, 91, 90, 86, 79, 79, 78, 79, 83, 88, 91, 91, 94, 96, 99, 101, 101, 101, 103, 106, 108, 108, 108, 110, 112, 111, 112, 111, 110, 108, 108, 110, 111, 110, 110, 109, 110, 112, 112, 112, 112, 112, 113, 112, 111, 110, 115, 112, 108, 107, 109, 110, 111, 109, 108, 108, 109, 109, 109, 109, 108, 108, 108, 109, 109, 111, 113, 114, 120, 119, 116, 118, 121, 117, 114, 115, 102, 64, 99, 163, 155, 92, 105, 118, 86, 84, 113, 107, 129, 171, 162, 92, 73, 83, 105, 107, 116, 118, 115, 117, 119, 113, 121, 123, 119, 116, 117, 114, 107, 114, 110, 97, 88, 84, 84, 85, 87, 89, 92, 97, 100, 103, 109, 114, 117, 116, 112, 113, 112, 108, 103, 102, 108, 105, 101, 109, 108, 105, 111, 108, 102, 103, 100, 98, 101, 106, 112, 114, 112, 111, 112, 112, 113, 114, 112, 109, 109, 111, 112, 110, 108, 108, 108, 108, 107, 109, 106, 107, 107, 105, 109, 102, 98, 104, 107, 105, 101, 99, 94, 88, 83, 77, 73, 78, 84, 88, 71, 50, 59, 100, 94, 39, 21, 33, 22, 11, 21, 22, 12, 14, 19, 19, 20, 21, 21, 21, 20, 22, 23, 22, 20, 19, 18, 17, 17, 18, 19, 20, 27, 26, 25, 25, 25, 26, 26, 25, 23, 22, 23, 24, 23, 22, 25, 23, 21, 20, 20, 21, 23, 23, 21, 26, 31, 28, 29, 39, 89, 122, 109, 75, 65, 78, 103, 111, 100, 96, 99, 97, 93, 95, 86, 87, 89, 90, 92, 93, 94, 94, 96, 98, 100, 102, 103, 103, 106, 108, 107, 105, 103, 102, 103, 102, 106, 108, 110, 110, 110, 111, 109, 110, 110, 110, 109, 109, 109, 108, 109, 111, 112, 113, 113, 113, 117, 114, 109, 107, 108, 108, 106, 109, 110, 110, 110, 110, 110, 110, 112, 112, 111, 110, 109, 109, 108, 106, 111, 111, 104, 107, 111, 106, 109, 105, 66, 56, 142, 167, 148, 141, 132, 95, 94, 79, 86, 113, 143, 119, 167, 180, 99, 76, 95, 110, 112, 112, 117, 120, 117, 116, 117, 119, 116, 110, 109, 108, 101, 79, 63, 49, 37, 31, 31, 35, 43, 52, 69, 91, 101, 106, 115, 118, 121, 122, 118, 118, 116, 109, 104, 106, 112, 107, 102, 110, 108, 104, 111, 108, 103, 108, 104, 100, 100, 106, 114, 117, 113, 111, 111, 111, 113, 116, 113, 108, 107, 111, 112, 112, 110, 108, 107, 107, 108, 110, 108, 109, 108, 103, 106, 103, 100, 106, 109, 106, 103, 101, 97, 91, 85, 79, 75, 67, 69, 85, 91, 68, 43, 62, 89, 67, 33, 21, 20, 21, 22, 18, 15, 13, 16, 18, 18, 19, 19, 18, 17, 19, 20, 20, 20, 19, 18, 18, 17, 18, 19, 20, 33, 31, 30, 29, 27, 26, 26, 25, 24, 23, 23, 24, 23, 22, 23, 21, 20, 21, 20, 21, 23, 22, 21, 28, 33, 28, 39, 66, 114, 124, 87, 64, 81, 94, 108, 107, 97, 100, 107, 102, 97, 102, 94, 96, 97, 99, 99, 99, 98, 99, 101, 101, 101, 102, 102, 102, 102, 103, 106, 106, 108, 110, 112, 114, 116, 117, 115, 111, 108, 108, 109, 109, 110, 110, 109, 108, 107, 109, 110, 110, 109, 108, 108, 108, 110, 108, 105, 105, 107, 107, 107, 109, 111, 111, 112, 111, 112, 112, 116, 115, 116, 111, 109, 102, 95, 84, 92, 89, 81, 80, 84, 81, 73, 84, 53, 80, 172, 161, 130, 133, 121, 74, 111, 98, 88, 93, 107, 126, 165, 176, 169, 95, 78, 91, 103, 105, 124, 121, 112, 109, 106, 101, 102, 105, 91, 82, 73, 66, 75, 90, 119, 146, 139, 112, 79, 68, 73, 75, 84, 102, 110, 112, 121, 116, 122, 121, 117, 111, 106, 108, 113, 108, 103, 109, 108, 104, 109, 108, 107, 111, 109, 106, 104, 108, 115, 117, 114, 111, 110, 111, 113, 115, 112, 108, 108, 111, 111, 111, 111, 109, 108, 108, 108, 109, 109, 111, 109, 102, 104, 103, 101, 104, 108, 107, 106, 105, 104, 98, 84, 74, 79, 80, 74, 74, 73, 72, 61, 47, 68, 83, 53, 20, 21, 33, 24, 14, 19, 17, 14, 18, 18, 18, 17, 16, 15, 18, 20, 20, 20, 20, 20, 19, 18, 18, 19, 20, 28, 28, 27, 27, 26, 25, 25, 24, 23, 22, 22, 22, 22, 23, 19, 18, 21, 23, 21, 19, 21, 21, 24, 28, 26, 30, 52, 132, 121, 110, 65, 84, 92, 97, 103, 105, 102, 99, 100, 103, 103, 102, 99, 100, 100, 101, 100, 99, 99, 98, 97, 95, 95, 96, 98, 99, 98, 98, 99, 102, 105, 108, 111, 110, 111, 111, 109, 107, 108, 110, 111, 110, 110, 109, 109, 110, 111, 111, 112, 112, 110, 107, 106, 107, 106, 106, 106, 109, 110, 110, 108, 107, 109, 111, 112, 111, 109, 107, 113, 122, 113, 105, 89, 61, 57, 64, 65, 63, 72, 68, 60, 46, 60, 99, 117, 166, 169, 148, 148, 139, 108, 106, 115, 125, 121, 107, 130, 119, 154, 151, 165, 155, 97, 78, 89, 87, 106, 92, 112, 105, 97, 106, 76, 83, 76, 53, 80, 144, 157, 141, 129, 135, 135, 144, 164, 169, 157, 141, 85, 82, 106, 107, 110, 108, 120, 121, 112, 113, 109, 107, 107, 106, 105, 106, 109, 109, 109, 108, 108, 106, 105, 104, 100, 100, 105, 110, 112, 113, 112, 113, 114, 113, 113, 113, 113, 113, 110, 107, 106, 108, 109, 108, 106, 105, 107, 108, 108, 105, 105, 106, 103, 101, 101, 101, 103, 105, 107, 106, 96, 85, 81, 76, 69, 66, 68, 66, 62, 49, 45, 72, 77, 55, 30, 22, 26, 17, 20, 22, 19, 20, 21, 20, 20, 20, 20, 20, 21, 21, 20, 20, 19, 19, 18, 18, 20, 22, 28, 27, 25, 23, 20, 18, 17, 20, 20, 20, 19, 19, 21, 22, 22, 19, 21, 23, 20, 16, 18, 24, 26, 30, 29, 31, 81, 151, 101, 69, 62, 102, 89, 108, 101, 105, 103, 101, 101, 102, 103, 101, 103, 103, 103, 102, 100, 98, 97, 94, 93, 93, 92, 94, 96, 98, 98, 99, 101, 103, 105, 106, 106, 111, 112, 112, 110, 109, 110, 111, 111, 110, 110, 109, 109, 110, 111, 111, 112, 112, 110, 107, 107, 108, 107, 106, 106, 109, 110, 110, 109, 106, 108, 111, 114, 113, 108, 103, 113, 131, 113, 88, 64, 76, 123, 167, 173, 173, 167, 152, 165, 181, 174, 191, 152, 162, 156, 151, 158, 152, 142, 117, 140, 146, 114, 105, 137, 128, 162, 159, 176, 195, 180, 98, 31, 56, 112, 117, 117, 91, 78, 86, 79, 56, 17, 53, 134, 136, 98, 99, 120, 124, 121, 126, 143, 162, 159, 216, 137, 55, 87, 103, 95, 124, 97, 116, 110, 107, 106, 105, 106, 106, 105, 106, 108, 110, 109, 108, 105, 102, 100, 98, 95, 95, 101, 106, 110, 112, 113, 113, 113, 113, 113, 111, 108, 106, 109, 110, 108, 108, 109, 110, 109, 105, 104, 107, 110, 109, 108, 109, 103, 100, 99, 101, 103, 107, 109, 111, 104, 94, 89, 84, 72, 65, 65, 65, 65, 55, 43, 60, 82, 71, 38, 20, 22, 18, 17, 16, 15, 17, 18, 18, 19, 20, 21, 20, 20, 19, 19, 19, 18, 18, 18, 19, 22, 24, 27, 27, 26, 24, 23, 21, 20, 21, 21, 21, 20, 21, 22, 23, 19, 17, 19, 22, 20, 18, 20, 27, 20, 28, 28, 23, 123, 98, 86, 54, 89, 92, 95, 97, 103, 104, 102, 102, 101, 101, 102, 103, 109, 108, 108, 106, 103, 101, 99, 104, 102, 100, 99, 98, 99, 100, 100, 101, 104, 106, 106, 106, 105, 108, 110, 110, 109, 108, 109, 111, 111, 110, 110, 109, 109, 110, 111, 111, 112, 112, 110, 108, 107, 109, 108, 107, 107, 110, 111, 110, 108, 105, 110, 114, 112, 107, 105, 107, 123, 111, 95, 87, 139, 179, 189, 173, 179, 162, 148, 141, 146, 117, 129, 124, 135, 141, 153, 167, 162, 164, 151, 163, 155, 151, 143, 135, 129, 146, 139, 140, 156, 153, 188, 200, 164, 114, 82, 80, 69, 74, 85, 65, 53, 97, 129, 151, 145, 134, 124, 127, 120, 121, 125, 109, 138, 159, 157, 174, 176, 104, 71, 80, 102, 109, 97, 105, 107, 103, 103, 104, 106, 106, 105, 106, 108, 108, 107, 106, 106, 106, 107, 108, 105, 105, 108, 110, 111, 112, 111, 110, 110, 112, 114, 113, 111, 108, 114, 116, 112, 108, 109, 108, 108, 106, 107, 110, 110, 109, 108, 108, 103, 100, 100, 102, 106, 109, 112, 114, 109, 103, 97, 92, 82, 73, 70, 70, 72, 72, 61, 59, 74, 79, 55, 28, 21, 24, 19, 16, 18, 19, 20, 20, 20, 20, 20, 20, 21, 20, 20, 19, 19, 19, 18, 18, 21, 23, 27, 27, 27, 27, 27, 27, 27, 24, 24, 23, 22, 22, 23, 24, 16, 15, 18, 21, 20, 20, 22, 19, 29, 27, 33, 86, 121, 79, 57, 82, 82, 83, 88, 90, 99, 97, 98, 99, 99, 99, 102, 105, 112, 112, 111, 109, 107, 105, 102, 98, 97, 96, 95, 96, 98, 100, 101, 102, 104, 105, 106, 106, 106, 106, 107, 108, 107, 106, 107, 109, 111, 110, 110, 109, 109, 110, 111, 111, 112, 113, 111, 109, 108, 110, 110, 109, 108, 110, 111, 110, 108, 107, 112, 115, 110, 104, 106, 114, 118, 110, 79, 102, 210, 173, 164, 158, 152, 149, 170, 158, 146, 109, 180, 120, 120, 142, 150, 159, 158, 166, 146, 198, 146, 132, 145, 122, 159, 197, 161, 152, 131, 147, 163, 115, 157, 185, 185, 175, 175, 169, 177, 165, 157, 166, 147, 155, 156, 135, 118, 117, 127, 144, 141, 100, 149, 203, 192, 179, 188, 174, 72, 62, 106, 90, 104, 100, 106, 105, 103, 106, 108, 108, 106, 106, 107, 107, 106, 105, 104, 105, 106, 107, 105, 105, 107, 109, 110, 111, 111, 110, 110, 111, 111, 110, 107, 105, 107, 108, 107, 106, 107, 108, 107, 108, 109, 112, 112, 109, 108, 107, 104, 101, 101, 104, 106, 110, 113, 112, 110, 106, 103, 101, 96, 87, 80, 80, 80, 84, 82, 64, 63, 75, 71, 44, 24, 24, 22, 19, 21, 23, 22, 22, 21, 20, 19, 20, 22, 22, 21, 21, 20, 20, 18, 17, 19, 22, 26, 26, 26, 27, 27, 26, 26, 27, 27, 25, 23, 22, 22, 23, 17, 15, 18, 21, 19, 18, 20, 23, 29, 27, 49, 135, 105, 68, 62, 84, 81, 76, 81, 84, 87, 92, 94, 97, 97, 98, 102, 107, 116, 116, 115, 112, 110, 108, 107, 99, 97, 96, 96, 97, 99, 101, 99, 99, 99, 100, 103, 104, 106, 106, 107, 108, 108, 107, 108, 111, 111, 110, 110, 109, 109, 110, 111, 111, 112, 113, 111, 109, 109, 111, 110, 109, 109, 110, 111, 111, 109, 109, 110, 110, 111, 112, 112, 113, 97, 99, 87, 115, 201, 159, 171, 176, 119, 103, 126, 126, 132, 112, 188, 131, 91, 196, 169, 144, 197, 159, 149, 199, 157, 154, 154, 117, 172, 198, 127, 165, 129, 154, 178, 159, 189, 133, 174, 190, 176, 148, 153, 164, 133, 143, 146, 126, 131, 166, 148, 142, 137, 140, 145, 101, 112, 141, 123, 167, 170, 210, 133, 73, 84, 92, 97, 105, 107, 109, 109, 110, 111, 111, 108, 106, 106, 107, 106, 104, 102, 102, 103, 105, 103, 102, 104, 106, 108, 111, 112, 111, 110, 110, 109, 108, 108, 107, 106, 105, 104, 107, 109, 109, 107, 107, 110, 112, 112, 111, 109, 110, 104, 100, 100, 102, 103, 106, 109, 110, 110, 110, 106, 107, 106, 97, 89, 88, 83, 81, 82, 64, 56, 67, 77, 57, 21, 20, 21, 19, 21, 20, 20, 20, 20, 20, 20, 20, 21, 21, 20, 20, 20, 19, 18, 18, 20, 23, 22, 23, 24, 25, 24, 22, 21, 24, 23, 23, 21, 19, 19, 20, 17, 16, 14, 16, 20, 19, 19, 30, 20, 28, 77, 133, 92, 57, 84, 72, 86, 71, 78, 78, 79, 84, 88, 91, 94, 97, 101, 104, 109, 110, 110, 109, 108, 107, 108, 105, 102, 98, 97, 98, 99, 99, 98, 98, 97, 98, 99, 101, 103, 104, 105, 106, 107, 108, 109, 111, 111, 110, 110, 110, 111, 112, 113, 111, 112, 114, 111, 109, 110, 113, 115, 112, 109, 111, 113, 113, 110, 109, 108, 109, 112, 113, 112, 110, 114, 97, 92, 119, 195, 176, 169, 161, 131, 154, 153, 140, 173, 172, 200, 142, 82, 211, 182, 121, 195, 143, 136, 181, 184, 190, 159, 117, 158, 186, 86, 147, 129, 139, 147, 92, 189, 188, 145, 146, 137, 144, 170, 114, 142, 185, 138, 146, 156, 140, 150, 142, 139, 158, 158, 129, 144, 152, 108, 179, 154, 196, 165, 87, 44, 66, 75, 97, 98, 111, 104, 109, 109, 110, 109, 105, 105, 106, 106, 104, 102, 102, 104, 106, 106, 105, 104, 104, 107, 110, 112, 109, 107, 108, 110, 111, 111, 111, 110, 109, 111, 113, 114, 113, 111, 108, 109, 112, 112, 112, 112, 113, 108, 104, 104, 104, 104, 105, 106, 107, 109, 109, 107, 109, 107, 102, 92, 89, 80, 73, 80, 66, 55, 64, 74, 61, 28, 19, 20, 19, 22, 20, 16, 18, 22, 21, 18, 18, 19, 19, 19, 21, 21, 19, 17, 18, 20, 23, 21, 22, 23, 24, 23, 20, 19, 18, 19, 21, 20, 19, 20, 22, 18, 16, 16, 19, 18, 26, 35, 21, 39, 46, 124, 121, 72, 69, 82, 79, 75, 73, 73, 76, 79, 78, 81, 85, 90, 95, 97, 98, 100, 101, 101, 101, 102, 103, 104, 101, 99, 95, 95, 96, 97, 96, 95, 96, 97, 100, 103, 107, 109, 109, 110, 109, 109, 108, 108, 107, 112, 112, 110, 109, 109, 110, 112, 106, 109, 111, 109, 108, 111, 116, 118, 114, 109, 111, 114, 114, 111, 107, 109, 111, 110, 109, 108, 109, 118, 115, 90, 106, 214, 170, 157, 172, 165, 147, 144, 155, 166, 143, 155, 137, 135, 183, 194, 177, 203, 139, 160, 124, 148, 160, 154, 131, 110, 146, 125, 196, 158, 152, 142, 130, 175, 179, 109, 172, 193, 174, 216, 139, 133, 196, 124, 134, 142, 126, 208, 123, 161, 211, 179, 138, 163, 160, 126, 170, 158, 154, 139, 134, 100, 64, 58, 76, 95, 124, 106, 116, 113, 108, 107, 105, 104, 105, 106, 103, 102, 102, 104, 107, 108, 106, 103, 103, 106, 110, 112, 108, 107, 109, 110, 110, 109, 107, 108, 110, 112, 114, 116, 116, 114, 111, 110, 112, 112, 112, 112, 113, 110, 110, 110, 109, 108, 106, 104, 104, 105, 107, 109, 109, 105, 103, 96, 92, 83, 79, 87, 79, 62, 62, 70, 63, 36, 21, 21, 21, 24, 24, 17, 19, 22, 19, 14, 15, 15, 17, 21, 25, 25, 24, 20, 19, 21, 24, 22, 22, 23, 23, 22, 20, 19, 17, 19, 21, 21, 21, 23, 25, 18, 15, 22, 27, 15, 30, 44, 14, 49, 87, 152, 92, 64, 73, 82, 78, 75, 73, 73, 75, 78, 75, 78, 81, 86, 90, 93, 94, 96, 95, 95, 99, 103, 102, 98, 97, 99, 100, 98, 96, 96, 98, 96, 96, 96, 97, 98, 101, 102, 103, 103, 105, 106, 108, 109, 110, 113, 112, 111, 109, 110, 112, 112, 107, 109, 112, 110, 109, 111, 115, 116, 113, 110, 111, 113, 113, 111, 108, 109, 111, 110, 109, 108, 110, 118, 114, 89, 83, 148, 196, 191, 160, 172, 151, 139, 159, 191, 187, 186, 145, 152, 124, 140, 167, 152, 103, 200, 139, 174, 156, 153, 143, 174, 198, 181, 167, 122, 146, 165, 114, 139, 156, 118, 179, 180, 141, 201, 150, 76, 168, 132, 155, 152, 115, 153, 126, 159, 170, 161, 99, 173, 141, 127, 121, 125, 136, 125, 140, 141, 157, 145, 78, 100, 122, 107, 120, 112, 107, 107, 106, 106, 106, 106, 104, 103, 105, 107, 110, 111, 110, 106, 106, 108, 110, 111, 109, 108, 109, 110, 110, 108, 106, 108, 108, 110, 113, 115, 114, 112, 110, 110, 112, 112, 112, 112, 113, 111, 110, 110, 110, 109, 107, 105, 105, 105, 106, 108, 107, 105, 103, 102, 99, 94, 90, 92, 97, 76, 59, 70, 68, 36, 17, 24, 23, 19, 23, 25, 22, 17, 16, 13, 13, 14, 16, 20, 25, 27, 27, 24, 22, 24, 26, 24, 24, 24, 23, 22, 21, 19, 18, 20, 21, 20, 20, 20, 22, 13, 17, 14, 22, 18, 29, 27, 32, 39, 124, 120, 77, 69, 79, 83, 78, 74, 75, 77, 78, 77, 74, 75, 78, 82, 86, 89, 91, 94, 92, 93, 100, 105, 103, 97, 94, 98, 100, 99, 96, 95, 98, 96, 96, 97, 99, 102, 104, 106, 106, 107, 107, 108, 109, 109, 109, 112, 112, 111, 112, 114, 117, 118, 113, 114, 115, 113, 112, 112, 113, 114, 112, 111, 112, 112, 112, 110, 108, 110, 112, 111, 110, 109, 110, 121, 108, 97, 78, 82, 136, 188, 194, 164, 145, 146, 123, 140, 155, 137, 100, 160, 158, 152, 146, 163, 145, 161, 161, 176, 182, 165, 141, 132, 124, 137, 143, 136, 156, 164, 132, 125, 138, 133, 169, 170, 128, 188, 164, 98, 173, 184, 181, 158, 151, 130, 145, 128, 140, 152, 109, 172, 175, 197, 192, 132, 160, 121, 108, 118, 145, 158, 106, 79, 106, 114, 112, 96, 109, 113, 104, 108, 108, 107, 106, 106, 108, 110, 112, 113, 111, 109, 109, 110, 111, 110, 110, 110, 110, 110, 109, 107, 106, 107, 107, 109, 111, 113, 113, 111, 109, 109, 111, 111, 111, 111, 112, 111, 110, 110, 110, 109, 107, 105, 105, 104, 105, 106, 106, 104, 102, 102, 97, 96, 91, 90, 103, 84, 60, 68, 72, 46, 26, 25, 21, 17, 23, 29, 24, 17, 15, 15, 14, 17, 17, 19, 21, 24, 25, 24, 22, 23, 24, 26, 25, 24, 22, 21, 21, 20, 20, 21, 22, 20, 18, 19, 20, 18, 20, 14, 18, 29, 28, 20, 57, 61, 146, 82, 78, 79, 79, 84, 79, 77, 78, 81, 82, 80, 76, 76, 78, 81, 84, 88, 91, 93, 92, 95, 100, 104, 104, 101, 97, 98, 100, 99, 97, 99, 100, 99, 99, 99, 100, 102, 104, 106, 107, 107, 108, 108, 109, 109, 109, 115, 114, 113, 111, 112, 113, 114, 109, 109, 111, 112, 113, 113, 113, 112, 112, 112, 112, 111, 110, 109, 109, 111, 112, 112, 110, 110, 111, 119, 113, 104, 94, 85, 95, 97, 133, 182, 163, 151, 143, 132, 138, 155, 145, 159, 149, 169, 181, 195, 165, 148, 201, 140, 130, 132, 152, 171, 174, 179, 184, 165, 149, 152, 136, 134, 164, 166, 138, 129, 118, 145, 125, 117, 119, 124, 116, 99, 118, 144, 156, 147, 110, 140, 118, 120, 129, 120, 117, 111, 124, 124, 145, 140, 154, 174, 121, 70, 102, 122, 113, 93, 113, 119, 104, 107, 108, 108, 107, 108, 108, 109, 110, 111, 110, 109, 110, 112, 111, 108, 111, 113, 112, 110, 109, 106, 106, 106, 107, 110, 112, 114, 113, 111, 110, 110, 112, 112, 112, 112, 113, 112, 111, 111, 111, 110, 108, 106, 106, 104, 105, 105, 105, 104, 103, 100, 95, 93, 88, 91, 100, 88, 69, 67, 73, 72, 50, 26, 18, 21, 23, 24, 25, 21, 17, 17, 19, 20, 21, 20, 19, 21, 24, 23, 22, 21, 21, 27, 26, 24, 22, 21, 20, 20, 19, 21, 22, 21, 20, 21, 24, 24, 14, 23, 17, 27, 20, 43, 32, 111, 123, 80, 69, 76, 71, 84, 80, 78, 82, 86, 87, 85, 80, 79, 79, 81, 85, 88, 92, 92, 93, 95, 97, 100, 103, 104, 104, 101, 99, 101, 104, 105, 105, 104, 103, 102, 101, 101, 101, 101, 103, 104, 105, 107, 109, 111, 111, 115, 115, 113, 113, 113, 115, 116, 112, 111, 112, 114, 114, 113, 111, 110, 112, 113, 113, 111, 110, 109, 109, 111, 113, 112, 110, 110, 111, 116, 119, 102, 99, 97, 111, 96, 70, 104, 146, 176, 125, 46, 29, 33, 48, 57, 52, 54, 71, 55, 66, 100, 84, 102, 90, 80, 120, 91, 88, 53, 97, 139, 159, 176, 161, 148, 152, 184, 185, 174, 164, 172, 189, 171, 169, 172, 174, 177, 173, 168, 183, 163, 128, 149, 164, 162, 161, 162, 150, 148, 131, 123, 133, 114, 165, 200, 95, 90, 109, 104, 114, 104, 108, 112, 108, 109, 108, 108, 108, 108, 108, 108, 108, 108, 108, 108, 110, 112, 111, 108, 112, 114, 112, 110, 108, 106, 106, 107, 108, 110, 112, 114, 114, 112, 110, 110, 112, 112, 112, 113, 113, 112, 111, 111, 111, 110, 108, 106, 106, 104, 104, 104, 104, 103, 103, 100, 101, 94, 88, 99, 99, 93, 83, 66, 72, 97, 76, 26, 13, 28, 23, 15, 26, 30, 20, 20, 23, 23, 24, 24, 23, 24, 27, 28, 25, 24, 23, 29, 28, 27, 26, 25, 23, 23, 23, 23, 23, 24, 26, 25, 23, 19, 18, 24, 25, 26, 24, 33, 34, 144, 94, 77, 65, 71, 75, 82, 81, 81, 83, 85, 86, 85, 83, 82, 81, 82, 84, 87, 90, 88, 90, 92, 94, 97, 99, 101, 101, 100, 102, 103, 104, 104, 103, 99, 100, 101, 102, 103, 105, 106, 106, 106, 106, 107, 109, 110, 112, 114, 114, 114, 114, 115, 117, 119, 118, 116, 115, 115, 115, 114, 111, 111, 111, 112, 112, 112, 112, 111, 110, 109, 109, 111, 113, 113, 112, 117, 107, 106, 100, 106, 105, 111, 102, 47, 81, 168, 121, 21, 78, 167, 141, 81, 60, 95, 145, 68, 85, 124, 131, 187, 157, 121, 195, 183, 199, 82, 55, 60, 58, 66, 68, 76, 64, 99, 81, 89, 86, 96, 122, 99, 112, 107, 109, 84, 89, 76, 111, 104, 121, 120, 133, 137, 150, 150, 156, 148, 138, 123, 131, 152, 195, 153, 85, 93, 101, 99, 105, 106, 106, 106, 106, 106, 106, 106, 106, 109, 112, 114, 114, 111, 110, 110, 110, 110, 109, 107, 108, 109, 109, 109, 110, 110, 110, 111, 110, 112, 112, 111, 112, 111, 112, 112, 114, 114, 114, 115, 115, 113, 112, 111, 111, 110, 109, 107, 107, 107, 105, 105, 105, 105, 106, 105, 105, 99, 89, 96, 102, 103, 94, 68, 72, 94, 111, 21, 22, 23, 32, 22, 19, 30, 21, 21, 22, 22, 22, 22, 24, 27, 31, 28, 25, 26, 27, 24, 24, 24, 25, 26, 26, 26, 26, 24, 23, 25, 27, 25, 23, 16, 22, 24, 28, 32, 35, 22, 89, 153, 88, 78, 69, 76, 81, 85, 85, 86, 87, 88, 89, 89, 88, 87, 84, 83, 84, 85, 87, 86, 87, 88, 90, 93, 96, 98, 94, 98, 102, 105, 107, 108, 108, 103, 103, 104, 104, 106, 106, 106, 106, 106, 106, 107, 109, 111, 112, 115, 115, 113, 111, 111, 111, 111, 111, 110, 110, 111, 114, 114, 113, 111, 111, 111, 112, 112, 113, 113, 110, 108, 107, 110, 113, 113, 112, 122, 109, 112, 104, 107, 114, 114, 102, 74, 54, 104, 107, 35, 156, 168, 217, 162, 69, 170, 212, 103, 115, 158, 200, 215, 184, 166, 225, 140, 116, 77, 183, 204, 191, 109, 177, 199, 99, 41, 138, 159, 102, 46, 109, 117, 109, 55, 102, 102, 148, 90, 37, 100, 114, 81, 34, 52, 67, 66, 46, 136, 145, 145, 156, 145, 155, 101, 83, 105, 107, 108, 111, 113, 113, 109, 107, 106, 107, 106, 106, 108, 111, 113, 112, 111, 111, 110, 110, 108, 107, 107, 107, 107, 108, 108, 107, 106, 105, 106, 106, 107, 108, 108, 111, 112, 112, 112, 114, 114, 114, 114, 115, 114, 112, 112, 111, 110, 108, 107, 107, 106, 105, 105, 106, 106, 107, 107, 106, 100, 92, 93, 102, 105, 94, 70, 72, 89, 133, 51, 31, 25, 29, 23, 15, 25, 23, 22, 21, 21, 21, 23, 25, 28, 31, 27, 23, 26, 28, 28, 28, 27, 27, 26, 26, 25, 26, 24, 24, 24, 25, 25, 24, 21, 23, 28, 26, 32, 32, 18, 157, 139, 81, 78, 71, 82, 86, 91, 92, 92, 93, 94, 93, 94, 93, 92, 89, 86, 84, 84, 85, 83, 84, 85, 87, 90, 92, 94, 93, 95, 99, 103, 105, 106, 106, 102, 102, 104, 106, 108, 109, 110, 110, 110, 110, 110, 110, 111, 112, 114, 113, 112, 111, 110, 110, 110, 110, 109, 109, 111, 113, 114, 113, 111, 111, 111, 111, 111, 111, 112, 110, 109, 109, 110, 112, 112, 111, 121, 112, 112, 103, 104, 114, 115, 109, 96, 39, 73, 116, 27, 98, 156, 218, 162, 89, 178, 220, 128, 124, 162, 221, 205, 190, 172, 221, 206, 206, 126, 225, 153, 175, 169, 210, 150, 228, 84, 212, 198, 134, 85, 203, 184, 146, 63, 185, 153, 203, 95, 45, 209, 191, 138, 76, 174, 185, 181, 52, 127, 167, 168, 136, 92, 94, 87, 89, 111, 110, 110, 113, 115, 115, 112, 110, 110, 109, 108, 107, 108, 109, 109, 108, 109, 110, 109, 109, 108, 107, 107, 107, 108, 108, 108, 108, 106, 105, 107, 108, 109, 109, 109, 110, 112, 111, 110, 112, 112, 112, 113, 113, 113, 112, 111, 109, 108, 105, 104, 105, 104, 104, 104, 106, 107, 108, 109, 108, 102, 94, 94, 99, 103, 92, 73, 69, 84, 141, 100, 25, 33, 28, 27, 20, 21, 25, 21, 23, 22, 22, 23, 25, 28, 30, 28, 25, 28, 30, 34, 32, 31, 29, 27, 26, 25, 26, 25, 25, 24, 24, 25, 26, 26, 24, 30, 25, 30, 32, 48, 199, 119, 74, 75, 72, 83, 87, 94, 94, 94, 95, 95, 95, 95, 93, 91, 89, 88, 87, 87, 87, 85, 84, 84, 85, 88, 92, 95, 93, 95, 99, 102, 104, 104, 106, 102, 102, 103, 104, 106, 107, 108, 107, 107, 107, 109, 111, 113, 114, 113, 113, 112, 111, 111, 111, 112, 112, 111, 110, 111, 113, 113, 112, 111, 111, 111, 111, 111, 111, 111, 110, 110, 110, 110, 109, 109, 110, 118, 113, 108, 101, 99, 111, 111, 102, 81, 42, 76, 100, 65, 167, 216, 176, 66, 58, 128, 181, 92, 112, 197, 229, 139, 188, 175, 202, 168, 223, 138, 231, 160, 171, 157, 229, 161, 194, 82, 215, 171, 126, 98, 239, 166, 72, 64, 178, 154, 199, 81, 92, 162, 142, 179, 77, 127, 169, 218, 68, 147, 184, 125, 74, 57, 87, 110, 103, 105, 108, 109, 111, 113, 112, 110, 110, 111, 110, 108, 107, 108, 111, 111, 110, 110, 110, 110, 110, 109, 109, 109, 108, 107, 108, 109, 109, 108, 107, 110, 111, 112, 111, 110, 110, 111, 111, 111, 113, 113, 113, 113, 114, 111, 109, 108, 107, 105, 103, 102, 104, 103, 104, 105, 106, 107, 109, 111, 110, 106, 98, 96, 96, 101, 93, 78, 68, 76, 134, 134, 19, 34, 30, 30, 23, 21, 28, 19, 24, 23, 23, 23, 25, 28, 30, 28, 26, 28, 31, 28, 28, 28, 27, 27, 27, 26, 25, 25, 24, 22, 22, 24, 27, 26, 25, 29, 30, 33, 39, 125, 196, 103, 78, 74, 76, 86, 87, 96, 96, 97, 97, 98, 97, 97, 93, 93, 91, 91, 91, 91, 91, 89, 88, 87, 87, 90, 94, 97, 95, 98, 102, 107, 111, 114, 114, 110, 109, 109, 108, 106, 105, 105, 105, 105, 106, 109, 111, 113, 115, 114, 113, 111, 109, 108, 107, 107, 107, 106, 106, 109, 112, 113, 112, 111, 111, 111, 111, 110, 110, 110, 110, 111, 112, 109, 107, 107, 108, 118, 116, 106, 103, 102, 114, 106, 111, 63, 55, 143, 105, 86, 209, 139, 165, 107, 102, 180, 172, 59, 113, 217, 174, 91, 177, 162, 215, 171, 223, 111, 177, 180, 185, 111, 153, 163, 213, 78, 134, 144, 110, 99, 230, 186, 191, 56, 166, 173, 212, 78, 134, 154, 124, 173, 60, 130, 185, 201, 31, 159, 175, 94, 69, 85, 99, 113, 111, 107, 109, 114, 116, 116, 112, 109, 107, 107, 108, 107, 107, 108, 111, 112, 111, 109, 108, 108, 108, 108, 108, 108, 107, 107, 107, 107, 105, 104, 103, 104, 106, 107, 108, 108, 111, 112, 112, 112, 113, 114, 114, 114, 114, 111, 109, 108, 107, 107, 106, 105, 106, 106, 105, 106, 107, 107, 109, 112, 112, 108, 104, 98, 96, 102, 97, 85, 70, 76, 123, 153, 38, 29, 25, 24, 19, 25, 28, 23, 24, 23, 24, 24, 24, 27, 30, 28, 27, 29, 32, 32, 32, 31, 29, 27, 26, 26, 24, 25, 24, 22, 21, 24, 28, 28, 27, 26, 33, 32, 39, 189, 159, 85, 80, 74, 85, 91, 95, 101, 101, 102, 103, 103, 102, 102, 98, 98, 96, 96, 96, 94, 93, 93, 92, 91, 90, 94, 98, 101, 99, 103, 106, 110, 113, 113, 113, 107, 107, 107, 108, 109, 109, 109, 110, 109, 109, 110, 112, 113, 114, 113, 112, 111, 111, 111, 112, 113, 113, 111, 110, 112, 113, 112, 111, 111, 111, 111, 110, 109, 109, 109, 110, 112, 113, 110, 106, 106, 108, 118, 116, 102, 103, 104, 115, 102, 120, 59, 57, 208, 120, 69, 193, 208, 215, 116, 130, 226, 176, 49, 103, 216, 122, 112, 170, 134, 200, 178, 167, 61, 59, 112, 171, 91, 100, 135, 168, 24, 40, 105, 108, 110, 219, 127, 173, 78, 154, 159, 203, 86, 98, 153, 138, 177, 113, 170, 143, 135, 59, 154, 200, 86, 56, 103, 103, 102, 112, 107, 108, 112, 113, 113, 110, 107, 106, 107, 108, 106, 105, 107, 109, 109, 108, 105, 104, 105, 105, 105, 105, 105, 104, 105, 105, 106, 107, 107, 107, 108, 109, 109, 109, 109, 110, 112, 110, 109, 111, 111, 111, 112, 112, 111, 111, 111, 111, 111, 111, 110, 111, 109, 108, 107, 108, 108, 109, 112, 112, 109, 107, 102, 98, 105, 103, 92, 77, 80, 110, 155, 58, 28, 30, 25, 20, 32, 26, 23, 23, 24, 24, 24, 26, 28, 30, 28, 27, 29, 32, 36, 33, 31, 31, 31, 30, 29, 27, 27, 26, 25, 26, 29, 31, 29, 27, 27, 31, 30, 90, 197, 140, 72, 76, 67, 83, 100, 113, 103, 103, 101, 100, 99, 100, 102, 98, 98, 98, 97, 97, 97, 97, 99, 99, 100, 101, 104, 106, 108, 106, 107, 108, 108, 110, 110, 110, 108, 108, 108, 109, 108, 108, 107, 107, 109, 112, 112, 111, 112, 114, 115, 115, 112, 110, 109, 108, 107, 106, 107, 109, 111, 114, 116, 118, 118, 116, 114, 114, 114, 114, 113, 114, 114, 114, 112, 111, 111, 110, 122, 113, 122, 116, 103, 97, 112, 78, 44, 110, 200, 135, 24, 42, 120, 96, 47, 53, 81, 78, 51, 42, 59, 48, 90, 119, 62, 29, 31, 44, 58, 45, 89, 162, 95, 185, 222, 178, 45, 64, 129, 108, 105, 222, 179, 194, 69, 128, 184, 217, 86, 61, 185, 193, 155, 99, 154, 139, 203, 35, 115, 184, 87, 68, 92, 111, 111, 113, 107, 103, 112, 113, 112, 113, 114, 115, 113, 110, 109, 109, 110, 110, 109, 107, 106, 105, 105, 110, 113, 109, 101, 103, 106, 105, 105, 105, 105, 104, 104, 105, 106, 107, 109, 112, 114, 114, 113, 112, 112, 112, 112, 110, 109, 109, 108, 108, 109, 110, 110, 105, 102, 104, 107, 110, 112, 112, 113, 107, 101, 104, 103, 97, 100, 103, 93, 73, 71, 81, 143, 91, 41, 39, 35, 28, 26, 23, 24, 25, 26, 27, 25, 22, 18, 15, 19, 25, 25, 26, 33, 31, 29, 30, 31, 31, 30, 27, 27, 27, 27, 27, 26, 25, 20, 26, 28, 36, 38, 130, 180, 124, 64, 72, 70, 88, 102, 110, 100, 102, 103, 103, 101, 102, 104, 104, 104, 106, 107, 108, 109, 110, 102, 101, 103, 105, 107, 110, 111, 110, 110, 110, 110, 110, 111, 111, 109, 109, 109, 109, 108, 107, 106, 105, 107, 110, 111, 111, 111, 113, 114, 114, 112, 110, 109, 109, 108, 107, 107, 109, 111, 114, 117, 118, 118, 116, 114, 115, 117, 118, 117, 118, 117, 117, 116, 115, 114, 114, 121, 112, 114, 116, 110, 104, 108, 83, 36, 109, 215, 155, 91, 44, 34, 42, 59, 57, 46, 46, 64, 60, 59, 55, 65, 70, 61, 79, 79, 63, 50, 50, 84, 98, 80, 129, 123, 87, 51, 75, 89, 77, 104, 171, 178, 117, 36, 123, 167, 152, 52, 65, 182, 160, 119, 95, 165, 183, 174, 34, 89, 177, 105, 78, 100, 124, 120, 116, 109, 98, 110, 114, 113, 113, 115, 115, 114, 111, 110, 110, 109, 108, 108, 108, 108, 106, 105, 108, 112, 109, 103, 106, 107, 105, 105, 105, 104, 103, 104, 105, 106, 107, 110, 113, 114, 115, 113, 112, 112, 112, 112, 110, 108, 108, 109, 110, 112, 113, 113, 112, 111, 110, 110, 111, 111, 112, 111, 106, 102, 107, 104, 97, 97, 100, 93, 74, 70, 78, 138, 96, 40, 36, 33, 28, 23, 20, 20, 22, 24, 25, 25, 22, 18, 16, 22, 29, 29, 29, 29, 27, 27, 28, 30, 30, 30, 27, 28, 28, 28, 27, 25, 23, 19, 28, 28, 38, 50, 175, 158, 107, 62, 70, 77, 96, 103, 104, 98, 103, 107, 108, 107, 107, 108, 111, 111, 111, 111, 111, 111, 112, 111, 111, 111, 111, 112, 114, 114, 115, 115, 114, 113, 113, 112, 112, 112, 112, 112, 111, 109, 107, 106, 103, 105, 108, 109, 109, 110, 112, 113, 113, 111, 110, 110, 110, 110, 110, 110, 112, 112, 114, 117, 118, 117, 116, 114, 116, 118, 119, 118, 118, 118, 117, 117, 116, 115, 115, 117, 116, 106, 116, 118, 115, 104, 94, 49, 85, 167, 167, 156, 152, 148, 139, 135, 144, 159, 172, 184, 185, 151, 123, 116, 108, 110, 120, 112, 105, 153, 160, 150, 147, 140, 145, 146, 140, 141, 126, 122, 93, 90, 92, 92, 58, 59, 58, 50, 50, 23, 43, 82, 48, 38, 37, 41, 62, 51, 52, 123, 189, 99, 60, 91, 119, 115, 114, 113, 104, 112, 115, 114, 114, 115, 115, 113, 113, 111, 109, 107, 106, 108, 109, 109, 107, 106, 106, 110, 109, 107, 108, 108, 104, 103, 103, 104, 103, 105, 106, 106, 108, 110, 112, 114, 115, 113, 112, 112, 112, 112, 110, 108, 108, 110, 111, 110, 109, 107, 110, 111, 109, 108, 109, 110, 112, 109, 105, 104, 111, 108, 100, 97, 95, 91, 78, 73, 84, 138, 113, 46, 42, 38, 32, 26, 20, 17, 19, 23, 25, 25, 23, 20, 18, 24, 31, 31, 31, 28, 26, 25, 27, 29, 29, 29, 29, 28, 28, 27, 29, 30, 32, 29, 34, 28, 30, 62, 195, 137, 102, 69, 71, 80, 98, 105, 104, 98, 103, 109, 111, 111, 111, 111, 111, 111, 110, 110, 108, 107, 107, 113, 113, 113, 114, 115, 117, 118, 118, 117, 117, 116, 115, 115, 114, 114, 114, 114, 113, 111, 109, 107, 104, 106, 108, 109, 108, 109, 110, 111, 111, 110, 110, 109, 110, 111, 111, 111, 112, 113, 114, 117, 118, 119, 116, 114, 114, 115, 115, 114, 114, 114, 114, 114, 113, 113, 113, 115, 122, 113, 118, 117, 116, 102, 109, 67, 59, 124, 210, 187, 169, 161, 156, 162, 180, 170, 122, 69, 54, 42, 61, 78, 73, 81, 86, 53, 57, 57, 71, 145, 162, 152, 155, 186, 170, 177, 173, 169, 164, 151, 142, 166, 181, 180, 197, 197, 188, 188, 160, 143, 152, 171, 172, 186, 176, 170, 162, 165, 151, 75, 68, 106, 122, 117, 113, 114, 107, 113, 116, 115, 115, 116, 115, 113, 113, 111, 109, 107, 106, 108, 109, 109, 106, 106, 107, 108, 109, 109, 110, 109, 104, 102, 104, 103, 102, 105, 107, 108, 109, 110, 113, 114, 115, 113, 112, 112, 112, 112, 110, 109, 110, 112, 112, 111, 108, 105, 109, 111, 109, 108, 107, 110, 111, 107, 104, 108, 113, 112, 105, 99, 94, 92, 83, 72, 84, 133, 129, 50, 44, 40, 35, 29, 24, 20, 23, 27, 29, 26, 23, 19, 16, 22, 28, 28, 28, 29, 27, 25, 27, 28, 28, 28, 30, 29, 28, 28, 29, 31, 32, 34, 34, 32, 31, 84, 177, 122, 96, 77, 72, 82, 98, 106, 109, 100, 104, 109, 112, 112, 112, 112, 110, 110, 111, 111, 112, 112, 112, 108, 108, 109, 111, 114, 117, 119, 117, 117, 117, 117, 117, 117, 117, 115, 115, 115, 114, 113, 111, 110, 107, 109, 110, 109, 107, 106, 107, 109, 109, 109, 108, 108, 108, 108, 108, 108, 110, 111, 114, 117, 118, 118, 116, 114, 114, 115, 115, 113, 113, 113, 113, 113, 113, 113, 113, 114, 118, 116, 117, 114, 110, 105, 120, 98, 77, 85, 131, 167, 174, 147, 140, 130, 104, 71, 56, 63, 70, 70, 91, 106, 100, 101, 102, 93, 76, 73, 67, 79, 113, 157, 186, 165, 153, 162, 155, 151, 160, 158, 160, 141, 133, 113, 99, 100, 108, 141, 168, 195, 200, 186, 184, 190, 163, 171, 166, 152, 122, 78, 82, 109, 113, 118, 116, 115, 114, 116, 118, 115, 115, 116, 115, 113, 112, 111, 109, 108, 108, 108, 109, 106, 106, 107, 109, 109, 109, 110, 111, 110, 104, 102, 102, 102, 102, 106, 108, 108, 109, 111, 113, 114, 115, 113, 112, 112, 112, 111, 110, 109, 110, 112, 114, 115, 115, 115, 116, 115, 113, 111, 109, 109, 108, 105, 105, 111, 114, 115, 112, 107, 101, 99, 89, 66, 76, 119, 134, 45, 36, 34, 29, 26, 24, 24, 25, 27, 29, 28, 25, 21, 18, 21, 26, 26, 26, 31, 28, 27, 27, 28, 27, 26, 28, 29, 30, 30, 29, 27, 26, 27, 31, 39, 39, 106, 153, 110, 87, 80, 74, 84, 98, 107, 112, 102, 105, 109, 111, 111, 111, 113, 116, 115, 115, 114, 113, 112, 112, 116, 116, 115, 115, 115, 115, 116, 115, 116, 116, 117, 117, 118, 118, 114, 114, 115, 115, 114, 113, 112, 111, 111, 112, 110, 107, 106, 106, 109, 109, 107, 106, 105, 105, 105, 105, 106, 108, 110, 114, 117, 118, 117, 116, 114, 115, 117, 118, 117, 116, 116, 116, 116, 116, 116, 116, 114, 107, 115, 113, 113, 106, 107, 107, 102, 102, 88, 85, 79, 84, 83, 79, 74, 75, 77, 84, 96, 101, 101, 111, 116, 112, 108, 112, 108, 96, 96, 104, 90, 82, 99, 122, 153, 210, 178, 180, 180, 145, 105, 54, 63, 73, 78, 75, 82, 89, 88, 76, 80, 95, 128, 161, 176, 180, 167, 151, 97, 78, 72, 84, 101, 100, 120, 119, 116, 117, 117, 118, 116, 116, 116, 115, 113, 110, 110, 110, 109, 109, 108, 107, 105, 106, 109, 110, 110, 110, 110, 112, 110, 105, 101, 102, 102, 102, 107, 109, 109, 110, 111, 112, 114, 115, 113, 112, 112, 112, 111, 110, 111, 112, 112, 112, 113, 114, 115, 111, 109, 109, 109, 109, 108, 107, 105, 106, 111, 116, 118, 118, 113, 106, 104, 91, 63, 73, 115, 144, 49, 38, 33, 27, 23, 20, 21, 23, 26, 28, 29, 26, 23, 22, 23, 26, 26, 26, 32, 31, 29, 28, 26, 25, 24, 22, 26, 25, 25, 30, 30, 22, 31, 35, 37, 40, 132, 146, 108, 97, 74, 78, 85, 97, 103, 111, 101, 104, 108, 112, 115, 117, 118, 115, 115, 115, 115, 115, 114, 114, 116, 116, 116, 116, 116, 116, 116, 115, 113, 113, 116, 120, 121, 119, 115, 114, 114, 117, 119, 117, 113, 112, 115, 117, 117, 113, 107, 103, 115, 115, 110, 106, 103, 102, 102, 104, 105, 107, 109, 113, 116, 118, 114, 114, 114, 114, 114, 114, 114, 114, 114, 114, 115, 115, 116, 116, 115, 116, 117, 116, 117, 117, 116, 112, 110, 106, 103, 102, 99, 98, 98, 98, 97, 98, 100, 103, 106, 111, 110, 107, 108, 113, 115, 115, 116, 113, 112, 113, 109, 95, 76, 53, 74, 126, 161, 153, 108, 62, 46, 61, 84, 99, 103, 104, 106, 108, 105, 101, 91, 82, 74, 67, 66, 67, 65, 66, 72, 83, 96, 107, 111, 111, 111, 113, 113, 114, 115, 115, 115, 115, 116, 115, 113, 111, 114, 117, 114, 110, 111, 116, 116, 115, 114, 112, 112, 112, 113, 114, 114, 111, 110, 106, 104, 103, 108, 111, 110, 111, 113, 114, 113, 111, 109, 107, 109, 113, 115, 112, 112, 111, 109, 111, 113, 112, 110, 107, 108, 108, 108, 107, 107, 110, 106, 105, 109, 114, 122, 126, 120, 111, 108, 93, 65, 84, 97, 153, 70, 40, 31, 30, 19, 27, 22, 22, 22, 23, 27, 30, 29, 25, 23, 25, 25, 24, 31, 31, 30, 29, 28, 27, 27, 27, 28, 26, 26, 30, 31, 27, 31, 40, 43, 47, 136, 151, 116, 98, 77, 78, 91, 105, 111, 116, 108, 110, 112, 115, 116, 117, 116, 115, 115, 115, 116, 116, 117, 117, 117, 117, 117, 117, 117, 117, 117, 117, 117, 117, 118, 118, 119, 119, 118, 117, 116, 116, 116, 114, 111, 108, 110, 111, 112, 111, 108, 106, 116, 116, 112, 109, 107, 107, 107, 107, 107, 108, 110, 113, 115, 117, 114, 114, 114, 114, 114, 114, 114, 114, 114, 114, 115, 116, 116, 116, 116, 115, 114, 113, 112, 111, 110, 110, 109, 109, 108, 108, 108, 108, 115, 117, 114, 114, 114, 116, 116, 118, 115, 112, 112, 114, 115, 115, 125, 122, 115, 110, 110, 111, 110, 96, 81, 65, 56, 57, 66, 73, 91, 100, 104, 106, 108, 112, 119, 121, 120, 117, 112, 106, 101, 98, 83, 79, 82, 83, 87, 95, 104, 109, 111, 111, 113, 115, 117, 116, 116, 116, 115, 116, 117, 115, 113, 112, 114, 117, 113, 109, 108, 111, 111, 111, 110, 111, 112, 114, 115, 115, 115, 114, 112, 109, 106, 104, 107, 109, 107, 108, 110, 111, 111, 111, 111, 110, 111, 114, 116, 114, 113, 111, 110, 111, 112, 112, 109, 107, 107, 109, 108, 107, 107, 110, 107, 107, 111, 114, 121, 124, 118, 109, 105, 88, 66, 90, 105, 163, 86, 46, 36, 33, 23, 27, 22, 23, 27, 30, 31, 31, 28, 25, 25, 25, 25, 25, 31, 31, 31, 31, 31, 31, 31, 31, 31, 30, 29, 29, 29, 26, 36, 44, 42, 57, 149, 157, 125, 95, 78, 75, 94, 108, 117, 119, 111, 112, 114, 116, 117, 116, 116, 115, 115, 116, 117, 118, 119, 119, 118, 118, 118, 118, 118, 118, 118, 119, 121, 122, 119, 116, 116, 119, 119, 119, 119, 120, 120, 120, 119, 118, 116, 115, 113, 112, 111, 110, 116, 116, 113, 111, 110, 110, 110, 109, 109, 110, 110, 113, 115, 116, 114, 114, 114, 115, 115, 115, 115, 115, 116, 116, 116, 116, 116, 116, 115, 115, 115, 115, 115, 115, 115, 116, 115, 115, 114, 113, 113, 112, 121, 123, 122, 121, 120, 120, 119, 119, 118, 115, 114, 115, 115, 116, 120, 124, 127, 124, 116, 108, 102, 107, 108, 109, 111, 110, 104, 98, 110, 116, 115, 118, 121, 121, 119, 125, 126, 124, 121, 117, 112, 109, 105, 105, 108, 107, 106, 106, 107, 109, 110, 110, 113, 118, 120, 119, 117, 116, 115, 116, 117, 116, 114, 112, 114, 116, 115, 114, 113, 115, 116, 115, 115, 116, 115, 116, 117, 116, 117, 116, 116, 113, 108, 105, 108, 108, 106, 106, 108, 109, 109, 111, 111, 111, 112, 113, 114, 114, 113, 112, 112, 112, 112, 110, 108, 107, 108, 109, 109, 107, 108, 111, 108, 108, 114, 115, 119, 120, 114, 107, 102, 82, 66, 90, 109, 168, 104, 49, 38, 33, 26, 27, 23, 27, 32, 37, 37, 32, 27, 26, 25, 26, 27, 28, 31, 31, 31, 31, 32, 32, 32, 30, 31, 32, 32, 28, 24, 23, 47, 42, 39, 78, 168, 161, 128, 89, 80, 71, 94, 104, 115, 117, 106, 109, 111, 115, 116, 117, 117, 115, 115, 116, 117, 118, 119, 119, 118, 118, 118, 118, 118, 118, 118, 119, 121, 122, 119, 116, 117, 118, 120, 120, 121, 120, 119, 120, 121, 123, 121, 118, 116, 115, 116, 117, 114, 114, 112, 111, 110, 109, 109, 108, 108, 109, 110, 112, 114, 115, 114, 114, 114, 115, 116, 116, 117, 117, 116, 116, 116, 116, 116, 116, 116, 116, 116, 117, 116, 117, 117, 114, 114, 114, 114, 114, 114, 114, 119, 120, 119, 119, 117, 116, 115, 115, 116, 116, 116, 115, 116, 118, 122, 123, 120, 114, 112, 117, 124, 120, 112, 104, 100, 105, 113, 119, 124, 120, 113, 112, 117, 121, 123, 117, 116, 117, 119, 121, 122, 122, 111, 110, 116, 119, 118, 117, 116, 113, 110, 111, 114, 118, 121, 121, 119, 116, 116, 116, 118, 116, 114, 113, 114, 116, 117, 115, 114, 114, 115, 115, 115, 118, 119, 118, 118, 118, 118, 119, 119, 116, 111, 108, 111, 111, 108, 107, 108, 110, 110, 110, 111, 111, 111, 111, 111, 112, 112, 113, 113, 113, 110, 109, 108, 108, 109, 110, 109, 108, 109, 111, 109, 110, 116, 116, 118, 119, 115, 109, 102, 82, 67, 87, 105, 167, 120, 46, 36, 30, 27, 26, 24, 30, 34, 40, 39, 34, 29, 28, 27, 27, 27, 27, 31, 31, 31, 31, 30, 30, 30, 30, 30, 31, 32, 27, 27, 32, 48, 37, 44, 107, 185, 156, 127, 85, 86, 72, 95, 98, 111, 115, 104, 106, 110, 114, 116, 117, 117, 115, 115, 115, 116, 116, 117, 117, 117, 117, 117, 117, 117, 117, 117, 117, 117, 117, 118, 119, 119, 119, 121, 122, 120, 118, 115, 115, 117, 119, 118, 116, 116, 117, 119, 121, 114, 113, 112, 112, 109, 108, 107, 105, 105, 107, 109, 111, 114, 115, 114, 114, 115, 115, 116, 117, 117, 117, 117, 117, 117, 116, 116, 116, 118, 118, 116, 115, 113, 112, 112, 110, 109, 112, 113, 114, 116, 117, 111, 110, 111, 111, 111, 110, 109, 110, 113, 116, 117, 116, 117, 119, 114, 113, 112, 112, 111, 113, 117, 116, 117, 122, 127, 128, 124, 119, 119, 118, 118, 119, 117, 112, 107, 109, 110, 111, 112, 113, 112, 112, 116, 120, 126, 129, 127, 124, 120, 117, 112, 111, 112, 118, 121, 122, 119, 117, 116, 117, 118, 117, 115, 115, 115, 116, 116, 115, 112, 109, 108, 110, 112, 117, 120, 121, 122, 123, 121, 121, 119, 116, 113, 111, 114, 113, 109, 107, 109, 110, 111, 110, 111, 113, 112, 110, 110, 112, 112, 113, 114, 113, 109, 107, 108, 108, 109, 110, 109, 108, 109, 112, 109, 112, 118, 119, 118, 119, 116, 110, 105, 84, 71, 84, 102, 168, 136, 47, 36, 28, 28, 25, 24, 30, 33, 36, 37, 36, 33, 30, 27, 25, 24, 24, 31, 31, 31, 30, 29, 29, 29, 33, 28, 28, 29, 28, 34, 45, 42, 34, 55, 130, 194, 148, 124, 85, 93, 77, 99, 96, 110, 116, 106, 108, 112, 114, 115, 116, 116, 115, 115, 115, 115, 115, 114, 114, 116, 116, 116, 116, 116, 116, 116, 115, 113, 113, 116, 120, 121, 119, 119, 120, 121, 119, 117, 120, 123, 124, 122, 120, 118, 118, 119, 119, 115, 115, 114, 113, 110, 108, 106, 102, 103, 105, 107, 111, 114, 115, 114, 114, 115, 116, 117, 117, 119, 118, 118, 118, 117, 116, 116, 116, 116, 116, 115, 115, 115, 115, 115, 116, 116, 116, 117, 117, 117, 117, 105, 102, 104, 104, 104, 104, 104, 106, 110, 115, 117, 117, 118, 121, 112, 110, 109, 110, 112, 114, 117, 127, 130, 129, 130, 131, 133, 133, 126, 123, 116, 110, 107, 107, 107, 106, 106, 108, 112, 114, 115, 116, 113, 115, 122, 128, 129, 129, 127, 121, 115, 111, 111, 115, 120, 123, 119, 117, 117, 117, 118, 117, 115, 114, 114, 116, 118, 119, 117, 114, 114, 115, 117, 121, 122, 122, 122, 125, 123, 122, 119, 116, 114, 114, 115, 113, 108, 106, 107, 110, 111, 111, 113, 115, 114, 111, 110, 113, 113, 113, 116, 114, 109, 107, 108, 109, 110, 110, 110, 109, 109, 112, 109, 112, 120, 121, 119, 120, 119, 111, 106, 87, 75, 84, 101, 172, 150, 51, 38, 29, 29, 23, 22, 28, 32, 32, 37, 39, 37, 31, 26, 24, 24, 23, 35, 34, 34, 34, 34, 35, 35, 32, 35, 29, 24, 31, 32, 23, 44, 35, 47, 157, 190, 151, 114, 89, 82, 78, 101, 109, 113, 114, 112, 113, 116, 119, 121, 122, 122, 122, 122, 122, 122, 122, 122, 122, 118, 118, 118, 117, 117, 116, 116, 115, 116, 117, 118, 119, 119, 120, 119, 119, 120, 121, 122, 123, 123, 123, 122, 122, 121, 120, 119, 118, 120, 119, 118, 117, 115, 114, 113, 111, 111, 110, 110, 110, 111, 112, 112, 114, 116, 116, 114, 115, 116, 114, 115, 115, 115, 114, 115, 117, 118, 116, 114, 115, 118, 119, 118, 118, 119, 119, 117, 114, 114, 115, 115, 115, 116, 116, 115, 114, 112, 113, 114, 116, 118, 119, 118, 118, 120, 119, 119, 121, 122, 119, 113, 114, 118, 122, 122, 119, 117, 116, 116, 115, 117, 118, 118, 118, 118, 120, 119, 117, 117, 119, 120, 118, 118, 119, 120, 118, 117, 116, 115, 114, 115, 116, 117, 117, 118, 121, 124, 122, 117, 116, 117, 117, 115, 117, 117, 116, 117, 119, 120, 118, 117, 117, 118, 118, 119, 119, 119, 120, 120, 118, 117, 116, 116, 116, 114, 111, 108, 106, 106, 110, 113, 113, 113, 112, 110, 108, 109, 111, 114, 116, 116, 114, 112, 112, 113, 115, 114, 110, 109, 111, 112, 112, 113, 115, 117, 120, 123, 123, 120, 110, 112, 107, 73, 89, 106, 159, 148, 62, 40, 38, 41, 27, 24, 33, 26, 25, 30, 24, 26, 29, 28, 27, 26, 25, 34, 34, 33, 32, 33, 34, 33, 34, 36, 31, 28, 34, 36, 28, 46, 35, 51, 159, 189, 151, 113, 87, 82, 78, 101, 105, 108, 108, 106, 111, 117, 119, 119, 121, 123, 120, 120, 120, 120, 120, 120, 120, 119, 119, 119, 119, 119, 118, 118, 117, 118, 118, 118, 118, 118, 118, 118, 118, 118, 118, 118, 117, 117, 120, 120, 119, 118, 118, 117, 116, 115, 115, 115, 115, 114, 114, 114, 112, 111, 110, 110, 109, 109, 109, 109, 111, 114, 115, 115, 116, 117, 116, 116, 116, 115, 114, 115, 117, 118, 116, 114, 116, 118, 118, 117, 118, 119, 119, 115, 112, 110, 111, 111, 113, 115, 116, 116, 116, 116, 115, 115, 117, 118, 119, 119, 118, 119, 121, 121, 121, 119, 118, 117, 119, 120, 121, 121, 122, 122, 122, 122, 122, 122, 121, 120, 118, 117, 120, 119, 118, 118, 119, 120, 119, 118, 119, 117, 117, 117, 116, 114, 114, 115, 116, 117, 116, 118, 120, 123, 121, 118, 116, 117, 117, 115, 117, 117, 116, 118, 120, 121, 121, 120, 120, 120, 119, 118, 117, 116, 117, 117, 116, 116, 116, 116, 117, 115, 112, 109, 107, 107, 109, 112, 112, 113, 113, 111, 109, 109, 111, 114, 116, 116, 116, 113, 113, 114, 115, 113, 111, 111, 113, 115, 115, 117, 119, 120, 119, 121, 119, 116, 108, 109, 104, 70, 84, 104, 153, 154, 75, 45, 41, 45, 30, 28, 36, 29, 28, 33, 28, 29, 32, 31, 32, 31, 30, 35, 35, 33, 33, 33, 35, 34, 35, 34, 30, 30, 35, 36, 31, 49, 34, 55, 164, 188, 151, 111, 87, 83, 79, 100, 102, 104, 103, 103, 110, 117, 118, 118, 119, 122, 120, 120, 120, 120, 120, 120, 120, 120, 120, 119, 118, 118, 118, 118, 119, 118, 118, 118, 118, 118, 117, 119, 119, 118, 118, 118, 117, 117, 119, 119, 118, 117, 117, 117, 116, 115, 115, 115, 115, 114, 114, 114, 113, 112, 112, 110, 108, 107, 106, 105, 108, 111, 113, 114, 116, 118, 117, 118, 117, 116, 114, 115, 117, 118, 116, 114, 115, 116, 117, 116, 116, 117, 118, 116, 115, 115, 116, 118, 118, 118, 118, 117, 116, 116, 116, 117, 117, 118, 118, 119, 119, 120, 122, 123, 119, 116, 117, 121, 125, 122, 119, 121, 124, 124, 123, 123, 124, 123, 122, 120, 118, 116, 120, 119, 118, 118, 120, 121, 120, 119, 118, 119, 119, 118, 117, 116, 116, 118, 120, 120, 118, 118, 120, 121, 120, 119, 118, 117, 116, 116, 116, 116, 116, 118, 121, 123, 122, 121, 121, 121, 122, 122, 122, 123, 124, 123, 121, 119, 117, 115, 115, 114, 112, 110, 108, 107, 108, 110, 111, 112, 114, 114, 112, 110, 110, 112, 114, 116, 116, 114, 113, 114, 115, 113, 111, 112, 114, 117, 118, 118, 121, 122, 122, 120, 118, 118, 110, 110, 104, 72, 81, 106, 148, 162, 89, 47, 41, 47, 30, 30, 34, 29, 28, 34, 28, 29, 32, 31, 32, 31, 30, 37, 36, 36, 35, 36, 37, 36, 34, 32, 28, 29, 33, 33, 29, 49, 29, 58, 167, 186, 152, 110, 87, 84, 79, 99, 101, 105, 107, 107, 111, 115, 117, 118, 120, 121, 122, 122, 122, 122, 122, 122, 122, 118, 118, 117, 117, 117, 116, 116, 118, 118, 118, 118, 118, 118, 117, 119, 119, 120, 120, 121, 121, 121, 119, 119, 118, 118, 118, 118, 118, 119, 118, 117, 116, 114, 113, 112, 113, 113, 113, 112, 110, 107, 105, 105, 107, 110, 112, 112, 113, 115, 115, 116, 116, 115, 114, 115, 117, 118, 116, 114, 114, 116, 116, 115, 115, 116, 116, 116, 113, 113, 114, 115, 115, 115, 115, 115, 116, 117, 118, 118, 118, 118, 118, 119, 119, 121, 122, 122, 119, 117, 119, 122, 127, 125, 120, 119, 120, 120, 119, 119, 119, 120, 120, 119, 119, 118, 120, 119, 118, 119, 121, 122, 122, 121, 122, 122, 122, 121, 120, 119, 119, 120, 124, 124, 123, 121, 122, 119, 119, 120, 119, 118, 116, 116, 116, 115, 115, 117, 120, 121, 121, 120, 120, 120, 119, 119, 118, 118, 119, 119, 117, 116, 115, 115, 115, 115, 114, 111, 108, 107, 108, 108, 109, 111, 115, 116, 113, 111, 110, 111, 114, 117, 118, 116, 115, 116, 116, 115, 112, 113, 115, 118, 119, 117, 118, 122, 122, 120, 120, 122, 117, 113, 106, 75, 79, 111, 145, 172, 104, 48, 38, 45, 27, 28, 31, 26, 25, 30, 24, 26, 30, 29, 29, 28, 27, 37, 37, 36, 36, 36, 37, 36, 36, 31, 28, 30, 31, 30, 27, 46, 23, 59, 168, 184, 153, 110, 88, 84, 80, 99, 102, 109, 115, 116, 114, 113, 116, 120, 121, 120, 121, 121, 121, 121, 121, 121, 121, 120, 120, 119, 119, 119, 118, 118, 118, 119, 119, 119, 120, 120, 121, 119, 119, 119, 119, 119, 119, 119, 116, 116, 116, 117, 117, 117, 117, 118, 117, 116, 115, 113, 112, 112, 113, 114, 115, 114, 112, 110, 108, 108, 109, 111, 110, 109, 109, 110, 110, 112, 113, 113, 113, 115, 118, 118, 116, 114, 114, 115, 115, 114, 115, 116, 116, 113, 111, 110, 111, 113, 114, 114, 115, 117, 120, 122, 121, 121, 119, 119, 119, 120, 121, 122, 121, 119, 120, 120, 121, 121, 124, 124, 123, 121, 119, 118, 119, 117, 118, 119, 119, 119, 118, 118, 120, 119, 118, 119, 121, 123, 123, 122, 122, 123, 123, 122, 121, 121, 121, 124, 127, 127, 124, 123, 122, 118, 119, 121, 120, 117, 116, 117, 116, 115, 114, 116, 118, 119, 118, 118, 118, 117, 115, 113, 112, 111, 111, 112, 111, 111, 113, 114, 115, 116, 114, 112, 109, 108, 107, 107, 108, 111, 116, 118, 115, 112, 109, 111, 114, 118, 119, 118, 117, 117, 117, 116, 113, 113, 115, 116, 117, 115, 116, 119, 119, 117, 118, 122, 117, 113, 105, 76, 75, 113, 140, 180, 119, 50, 40, 47, 28, 31, 31, 28, 26, 31, 27, 28, 32, 30, 30, 29, 28, 36, 35, 35, 35, 35, 36, 34, 36, 33, 30, 31, 31, 30, 28, 44, 21, 59, 168, 182, 153, 111, 89, 85, 79, 98, 103, 113, 120, 122, 115, 112, 115, 120, 122, 119, 120, 119, 119, 119, 119, 119, 119, 121, 121, 121, 120, 119, 119, 120, 117, 118, 119, 120, 121, 122, 123, 119, 118, 117, 116, 115, 114, 114, 114, 115, 115, 115, 115, 115, 115, 113, 113, 113, 113, 113, 113, 113, 113, 114, 115, 116, 114, 112, 110, 110, 111, 112, 110, 107, 106, 106, 107, 109, 111, 111, 111, 114, 117, 117, 115, 114, 114, 115, 114, 113, 112, 113, 115, 115, 114, 115, 117, 120, 120, 119, 119, 120, 121, 122, 122, 122, 121, 120, 119, 120, 120, 121, 119, 117, 120, 122, 122, 120, 119, 122, 124, 122, 119, 119, 121, 119, 119, 120, 119, 118, 117, 117, 120, 119, 118, 119, 121, 123, 122, 120, 121, 121, 121, 121, 121, 122, 121, 123, 127, 127, 124, 122, 120, 117, 118, 120, 120, 117, 116, 117, 118, 116, 114, 115, 117, 116, 115, 115, 114, 114, 114, 115, 114, 113, 114, 113, 113, 113, 113, 114, 115, 115, 115, 113, 110, 108, 107, 106, 108, 111, 115, 118, 116, 112, 109, 110, 113, 117, 119, 117, 116, 116, 116, 115, 113, 112, 114, 114, 114, 113, 115, 117, 115, 112, 113, 117, 114, 110, 101, 73, 70, 110, 135, 183, 131, 54, 42, 51, 32, 35, 34, 31, 31, 36, 31, 32, 34, 33, 33, 32, 31, 40, 36, 35, 38, 40, 37, 30, 28, 35, 31, 34, 29, 33, 33, 40, 27, 63, 163, 179, 152, 113, 94, 86, 76, 96, 101, 111, 117, 118, 117, 116, 115, 117, 121, 122, 122, 118, 113, 111, 113, 115, 116, 116, 117, 118, 118, 118, 120, 122, 122, 120, 120, 122, 124, 123, 122, 118, 116, 116, 117, 117, 118, 119, 117, 115, 112, 113, 114, 114, 113, 111, 113, 114, 115, 114, 114, 115, 115, 115, 115, 115, 115, 115, 114, 114, 113, 112, 112, 111, 107, 105, 102, 104, 107, 107, 107, 109, 112, 113, 113, 115, 115, 115, 114, 113, 111, 111, 112, 113, 113, 113, 114, 115, 116, 116, 117, 117, 118, 118, 118, 119, 119, 120, 120, 118, 117, 114, 114, 116, 116, 117, 116, 115, 115, 115, 116, 116, 117, 116, 115, 115, 116, 117, 118, 118, 118, 118, 119, 119, 119, 119, 119, 119, 119, 116, 116, 116, 117, 118, 119, 120, 120, 121, 123, 123, 123, 121, 119, 120, 120, 118, 117, 117, 118, 118, 118, 117, 116, 116, 117, 115, 113, 112, 112, 111, 113, 115, 114, 111, 110, 110, 109, 112, 115, 117, 117, 115, 114, 114, 114, 112, 111, 110, 111, 110, 110, 112, 115, 114, 111, 111, 114, 117, 117, 116, 116, 117, 118, 117, 116, 116, 117, 117, 117, 117, 117, 116, 112, 114, 116, 113, 114, 116, 103, 74, 70, 106, 136, 180, 151, 51, 37, 47, 40, 37, 37, 35, 35, 34, 33, 32, 31, 30, 29, 29, 30, 40, 37, 36, 36, 37, 34, 29, 26, 33, 29, 33, 29, 34, 32, 42, 30, 59, 161, 182, 152, 110, 90, 85, 81, 103, 107, 114, 117, 114, 115, 118, 121, 124, 126, 127, 128, 123, 118, 116, 116, 117, 118, 119, 122, 123, 124, 124, 126, 130, 128, 125, 124, 124, 124, 123, 120, 119, 117, 116, 115, 114, 114, 114, 112, 110, 108, 109, 110, 112, 111, 108, 109, 113, 114, 112, 109, 107, 106, 109, 113, 116, 118, 117, 116, 118, 118, 118, 116, 114, 112, 110, 104, 106, 107, 107, 106, 107, 109, 112, 112, 113, 113, 113, 113, 112, 111, 111, 111, 110, 110, 109, 109, 112, 112, 113, 114, 116, 117, 117, 116, 116, 117, 119, 120, 122, 123, 121, 120, 118, 116, 114, 113, 113, 112, 113, 114, 115, 116, 116, 115, 116, 117, 118, 119, 119, 119, 119, 117, 118, 118, 119, 120, 120, 121, 120, 119, 118, 117, 116, 116, 115, 115, 118, 119, 123, 123, 123, 122, 121, 119, 117, 115, 113, 112, 112, 112, 111, 111, 113, 115, 115, 113, 111, 110, 111, 113, 116, 116, 115, 115, 113, 111, 112, 114, 115, 115, 114, 113, 112, 111, 110, 111, 112, 111, 110, 110, 112, 114, 114, 112, 111, 113, 115, 115, 115, 116, 118, 120, 119, 116, 112, 112, 112, 113, 111, 110, 110, 108, 112, 116, 114, 113, 114, 104, 77, 73, 107, 137, 184, 160, 59, 41, 50, 44, 40, 40, 39, 38, 37, 34, 31, 29, 30, 32, 32, 32, 41, 38, 36, 35, 35, 32, 28, 26, 31, 27, 32, 29, 34, 31, 45, 34, 55, 155, 185, 154, 110, 87, 86, 84, 106, 109, 111, 111, 113, 117, 121, 124, 125, 124, 123, 122, 119, 116, 116, 119, 121, 121, 123, 124, 124, 123, 122, 123, 125, 124, 123, 122, 123, 125, 124, 123, 118, 117, 116, 115, 114, 114, 114, 114, 110, 107, 106, 108, 109, 109, 108, 107, 107, 109, 111, 110, 108, 108, 109, 111, 113, 114, 113, 112, 113, 114, 115, 114, 114, 113, 115, 112, 111, 109, 106, 104, 102, 100, 103, 103, 103, 103, 103, 103, 103, 103, 103, 104, 105, 106, 106, 107, 108, 109, 109, 111, 112, 113, 114, 115, 115, 113, 111, 111, 112, 113, 111, 109, 108, 108, 109, 110, 112, 110, 110, 111, 112, 113, 113, 113, 113, 114, 115, 115, 116, 115, 115, 116, 116, 115, 114, 114, 113, 112, 111, 111, 111, 112, 114, 116, 116, 116, 117, 120, 121, 122, 122, 121, 117, 115, 114, 112, 112, 111, 110, 111, 110, 110, 111, 113, 113, 110, 110, 110, 110, 112, 112, 113, 113, 112, 110, 108, 108, 111, 113, 114, 114, 113, 110, 109, 109, 112, 114, 112, 111, 111, 112, 113, 113, 113, 113, 114, 114, 113, 110, 110, 111, 113, 112, 109, 107, 107, 109, 112, 109, 107, 105, 104, 107, 111, 109, 107, 109, 103, 81, 75, 104, 133, 184, 165, 63, 38, 43, 37, 35, 35, 33, 34, 33, 33, 31, 30, 32, 34, 34, 35, 40, 39, 37, 34, 34, 33, 31, 28, 32, 27, 33, 30, 33, 29, 44, 40, 50, 148, 185, 155, 114, 89, 87, 85, 107, 109, 111, 110, 116, 120, 125, 129, 130, 129, 126, 124, 121, 118, 118, 119, 120, 120, 121, 122, 123, 123, 123, 125, 127, 129, 127, 126, 127, 127, 126, 125, 117, 117, 116, 116, 116, 116, 117, 115, 111, 107, 105, 107, 108, 108, 111, 107, 104, 106, 110, 112, 112, 115, 113, 111, 109, 109, 109, 110, 108, 111, 113, 112, 111, 113, 117, 116, 114, 111, 111, 110, 108, 106, 104, 104, 103, 102, 103, 104, 104, 106, 106, 106, 106, 105, 104, 105, 107, 108, 108, 109, 110, 110, 111, 112, 111, 110, 109, 108, 109, 109, 107, 106, 105, 106, 106, 107, 109, 107, 107, 108, 108, 108, 108, 107, 106, 106, 107, 108, 108, 108, 108, 109, 109, 110, 109, 110, 110, 110, 108, 108, 108, 109, 111, 113, 114, 115, 116, 116, 118, 118, 118, 118, 110, 107, 108, 109, 110, 110, 110, 111, 110, 109, 110, 111, 110, 108, 108, 110, 110, 109, 108, 108, 109, 110, 108, 105, 106, 110, 113, 114, 114, 114, 112, 111, 111, 112, 114, 112, 111, 112, 112, 111, 112, 114, 114, 114, 114, 112, 110, 111, 114, 115, 114, 111, 108, 107, 108, 110, 107, 106, 104, 102, 103, 107, 105, 104, 107, 104, 87, 78, 101, 127, 181, 164, 64, 36, 40, 37, 37, 37, 36, 35, 34, 33, 32, 31, 32, 34, 35, 36, 40, 39, 37, 35, 34, 35, 35, 32, 35, 28, 34, 31, 33, 27, 42, 44, 47, 141, 183, 157, 123, 94, 91, 89, 111, 115, 120, 121, 122, 125, 130, 132, 132, 130, 127, 123, 121, 118, 118, 118, 118, 117, 119, 121, 123, 123, 123, 126, 129, 129, 128, 126, 126, 127, 126, 124, 118, 117, 116, 115, 114, 114, 114, 112, 108, 104, 104, 107, 110, 112, 114, 109, 105, 106, 109, 109, 106, 106, 107, 109, 113, 116, 117, 118, 119, 122, 121, 116, 111, 111, 114, 115, 113, 112, 113, 115, 114, 112, 109, 108, 107, 107, 107, 107, 108, 111, 110, 109, 108, 106, 105, 104, 109, 110, 110, 109, 109, 108, 108, 107, 107, 108, 109, 110, 110, 109, 107, 107, 107, 107, 105, 104, 103, 104, 105, 105, 105, 104, 102, 101, 100, 101, 102, 102, 103, 102, 102, 102, 103, 103, 104, 105, 105, 106, 104, 105, 104, 104, 105, 106, 106, 107, 109, 110, 110, 112, 113, 115, 104, 100, 102, 104, 106, 106, 106, 106, 106, 105, 107, 109, 108, 106, 107, 109, 110, 109, 107, 108, 111, 113, 111, 108, 107, 110, 112, 114, 115, 116, 115, 115, 114, 113, 113, 112, 112, 113, 112, 110, 111, 114, 115, 114, 113, 112, 110, 112, 115, 116, 114, 113, 111, 110, 110, 110, 106, 105, 104, 101, 104, 109, 108, 106, 109, 109, 94, 83, 101, 125, 183, 171, 71, 38, 40, 39, 39, 38, 36, 35, 34, 35, 33, 32, 33, 35, 37, 39, 37, 37, 36, 35, 36, 37, 37, 35, 33, 31, 35, 32, 35, 31, 40, 43, 47, 134, 182, 158, 126, 92, 95, 88, 116, 123, 132, 136, 130, 131, 131, 130, 129, 125, 122, 116, 115, 114, 117, 120, 122, 121, 123, 122, 123, 124, 123, 123, 124, 127, 122, 121, 122, 124, 127, 126, 120, 119, 117, 115, 113, 113, 112, 110, 105, 103, 104, 107, 108, 107, 110, 106, 103, 104, 106, 105, 100, 100, 103, 106, 108, 106, 103, 100, 105, 109, 111, 109, 108, 110, 114, 116, 112, 109, 110, 113, 111, 107, 106, 105, 104, 104, 104, 106, 107, 107, 106, 105, 106, 107, 107, 106, 107, 109, 108, 108, 108, 107, 107, 105, 105, 105, 106, 105, 105, 104, 99, 100, 101, 103, 104, 105, 105, 107, 107, 106, 104, 102, 99, 98, 98, 100, 101, 100, 98, 99, 101, 102, 102, 100, 100, 100, 101, 100, 97, 96, 97, 99, 101, 101, 98, 101, 104, 105, 105, 106, 107, 108, 102, 99, 101, 102, 103, 102, 100, 100, 100, 100, 104, 108, 108, 106, 107, 110, 112, 113, 112, 112, 112, 114, 113, 111, 110, 112, 113, 114, 116, 119, 120, 122, 121, 118, 116, 113, 113, 114, 114, 114, 115, 116, 115, 114, 113, 111, 110, 111, 111, 112, 111, 110, 110, 112, 112, 112, 108, 107, 108, 108, 111, 113, 113, 112, 112, 111, 99, 85, 103, 128, 184, 180, 74, 43, 39, 35, 34, 31, 30, 30, 31, 33, 33, 33, 34, 34, 35, 35, 34, 33, 33, 35, 38, 38, 35, 33, 27, 34, 36, 31, 36, 37, 39, 36, 47, 120, 178, 155, 123, 84, 94, 81, 117, 128, 139, 145, 133, 132, 131, 133, 135, 133, 130, 125, 123, 123, 125, 128, 129, 129, 129, 124, 125, 130, 130, 126, 124, 127, 122, 129, 131, 129, 129, 121, 124, 123, 120, 117, 112, 108, 106, 107, 112, 117, 114, 106, 100, 100, 97, 94, 91, 91, 91, 89, 86, 88, 94, 104, 115, 122, 126, 128, 132, 134, 137, 137, 137, 138, 139, 134, 130, 125, 123, 123, 121, 118, 118, 116, 112, 107, 101, 97, 93, 92, 92, 91, 91, 92, 93, 94, 101, 103, 104, 107, 110, 113, 115, 123, 124, 125, 126, 127, 129, 130, 138, 140, 140, 138, 137, 135, 133, 133, 134, 134, 134, 133, 130, 129, 130, 131, 131, 132, 133, 136, 141, 137, 135, 136, 138, 141, 144, 145, 143, 139, 136, 137, 137, 133, 128, 120, 123, 131, 135, 134, 130, 128, 126, 124, 122, 120, 119, 117, 113, 109, 105, 103, 104, 103, 99, 93, 90, 92, 98, 106, 110, 109, 105, 106, 110, 114, 119, 122, 123, 123, 122, 120, 119, 120, 120, 117, 114, 110, 113, 119, 115, 107, 109, 119, 124, 123, 120, 116, 114, 112, 112, 120, 123, 118, 115, 114, 114, 112, 112, 114, 116, 117, 117, 116, 116, 119, 117, 113, 103, 81, 104, 135, 177, 180, 67, 46, 42, 35, 36, 33, 32, 32, 32, 32, 32, 32, 32, 31, 31, 31, 38, 37, 36, 36, 37, 36, 32, 31, 27, 33, 33, 30, 34, 35, 37, 34, 40, 104, 169, 153, 125, 86, 86, 74, 110, 127, 139, 142, 133, 131, 130, 129, 128, 126, 124, 118, 120, 122, 124, 127, 132, 136, 136, 128, 126, 130, 130, 126, 123, 121, 121, 124, 126, 125, 121, 116, 111, 111, 115, 116, 116, 114, 113, 102, 92, 84, 86, 92, 95, 93, 96, 127, 161, 176, 179, 187, 201, 216, 218, 216, 215, 213, 211, 211, 213, 215, 216, 215, 214, 215, 216, 218, 217, 213, 203, 194, 190, 189, 189, 189, 188, 187, 184, 181, 178, 178, 184, 189, 185, 181, 186, 195, 200, 198, 192, 186, 183, 183, 183, 182, 182, 184, 185, 187, 190, 191, 189, 191, 197, 202, 205, 207, 206, 204, 205, 208, 211, 212, 211, 210, 210, 206, 201, 205, 213, 217, 215, 218, 223, 225, 220, 212, 208, 210, 210, 212, 215, 218, 216, 208, 199, 214, 220, 218, 211, 205, 201, 200, 204, 203, 199, 198, 197, 196, 194, 195, 197, 198, 196, 191, 188, 186, 191, 190, 183, 174, 163, 151, 140, 126, 120, 122, 120, 115, 110, 105, 112, 114, 109, 107, 110, 115, 119, 126, 122, 109, 109, 118, 121, 116, 111, 111, 112, 108, 107, 112, 118, 122, 123, 122, 119, 116, 115, 116, 118, 118, 116, 117, 118, 119, 119, 121, 120, 118, 108, 82, 99, 131, 174, 177, 65, 45, 41, 34, 37, 34, 34, 33, 32, 32, 31, 31, 31, 31, 31, 31, 41, 39, 37, 37, 37, 36, 32, 30, 28, 32, 31, 29, 34, 32, 32, 32, 34, 89, 165, 157, 137, 96, 85, 74, 104, 125, 133, 136, 127, 128, 127, 126, 125, 123, 122, 119, 123, 125, 125, 125, 129, 135, 133, 127, 124, 127, 128, 125, 125, 128, 127, 116, 116, 126, 135, 148, 143, 139, 135, 133, 134, 139, 142, 157, 155, 151, 151, 158, 174, 187, 182, 175, 171, 171, 169, 156, 141, 141, 138, 134, 131, 128, 128, 129, 120, 120, 121, 120, 119, 120, 123, 129, 129, 130, 134, 138, 142, 143, 146, 148, 153, 157, 160, 162, 162, 169, 175, 178, 179, 179, 182, 187, 185, 184, 183, 183, 184, 186, 187, 182, 179, 177, 174, 171, 170, 169, 171, 171, 171, 171, 170, 170, 171, 175, 175, 173, 171, 171, 173, 175, 171, 168, 164, 164, 165, 166, 165, 163, 163, 161, 160, 161, 163, 165, 161, 161, 163, 163, 162, 163, 165, 162, 161, 163, 164, 163, 166, 169, 172, 170, 168, 168, 170, 172, 172, 172, 177, 182, 182, 178, 179, 183, 189, 190, 188, 188, 189, 189, 187, 193, 197, 198, 196, 191, 185, 179, 176, 172, 167, 162, 161, 159, 157, 146, 143, 148, 144, 131, 121, 117, 119, 118, 113, 111, 114, 119, 122, 115, 112, 116, 117, 116, 118, 122, 124, 123, 119, 118, 120, 121, 122, 122, 119, 119, 111, 81, 93, 124, 172, 178, 65, 46, 42, 36, 38, 36, 35, 33, 33, 31, 31, 30, 30, 31, 31, 32, 41, 39, 38, 38, 39, 38, 34, 31, 31, 35, 31, 30, 36, 32, 29, 34, 33, 78, 163, 162, 149, 105, 87, 81, 103, 123, 125, 128, 123, 123, 125, 124, 122, 121, 121, 122, 126, 128, 128, 127, 127, 127, 126, 124, 126, 127, 124, 123, 126, 109, 134, 149, 170, 185, 179, 183, 182, 190, 201, 206, 199, 185, 172, 155, 144, 127, 113, 109, 116, 127, 119, 116, 114, 116, 118, 116, 112, 110, 109, 106, 103, 102, 103, 104, 102, 103, 103, 101, 101, 103, 106, 104, 99, 97, 104, 113, 116, 113, 113, 113, 112, 112, 111, 109, 109, 110, 108, 108, 112, 117, 118, 115, 120, 121, 121, 120, 117, 114, 112, 124, 127, 126, 125, 125, 126, 126, 132, 132, 132, 135, 139, 144, 150, 150, 148, 146, 147, 150, 157, 163, 164, 171, 179, 181, 180, 186, 194, 199, 195, 187, 184, 183, 181, 178, 177, 181, 184, 180, 174, 170, 172, 173, 177, 182, 186, 186, 186, 186, 184, 181, 179, 179, 181, 181, 181, 178, 180, 182, 179, 174, 173, 177, 178, 177, 175, 176, 178, 179, 179, 165, 159, 161, 161, 160, 158, 156, 155, 154, 157, 161, 163, 161, 157, 160, 159, 158, 170, 186, 190, 182, 169, 154, 135, 118, 112, 113, 114, 115, 116, 119, 121, 121, 121, 123, 125, 125, 123, 121, 119, 121, 124, 122, 115, 115, 112, 82, 91, 120, 171, 180, 67, 48, 43, 37, 39, 36, 34, 33, 32, 32, 31, 31, 31, 31, 31, 31, 38, 37, 37, 39, 41, 41, 39, 34, 35, 38, 33, 33, 40, 34, 30, 38, 35, 71, 160, 162, 151, 106, 87, 86, 100, 119, 119, 124, 123, 125, 124, 120, 115, 113, 113, 114, 117, 123, 129, 132, 131, 128, 124, 127, 131, 130, 121, 120, 126, 142, 177, 189, 207, 214, 195, 195, 197, 194, 183, 162, 134, 104, 85, 74, 79, 89, 103, 109, 101, 88, 77, 88, 97, 92, 84, 83, 89, 93, 94, 97, 99, 100, 100, 100, 101, 101, 98, 94, 91, 91, 93, 99, 97, 95, 94, 94, 93, 91, 96, 97, 98, 99, 103, 107, 111, 110, 105, 99, 100, 105, 108, 108, 102, 101, 102, 104, 106, 109, 111, 108, 107, 107, 106, 106, 107, 108, 105, 103, 101, 101, 103, 104, 106, 108, 110, 110, 115, 118, 123, 126, 115, 118, 127, 129, 128, 132, 140, 149, 155, 159, 164, 168, 170, 170, 177, 190, 205, 208, 203, 200, 201, 189, 183, 179, 173, 167, 164, 164, 170, 173, 173, 174, 176, 176, 175, 176, 180, 181, 180, 178, 179, 182, 181, 178, 176, 177, 178, 178, 177, 185, 189, 186, 183, 181, 179, 178, 183, 185, 181, 177, 173, 168, 162, 158, 161, 166, 163, 158, 158, 165, 171, 172, 165, 147, 127, 117, 116, 120, 122, 122, 124, 126, 125, 122, 121, 125, 128, 124, 119, 118, 124, 122, 111, 111, 113, 87, 95, 120, 170, 180, 67, 47, 42, 35, 36, 33, 32, 32, 32, 32, 32, 32, 32, 31, 31, 31, 39, 39, 39, 38, 39, 40, 39, 37, 37, 37, 34, 33, 35, 33, 30, 39, 35, 61, 155, 164, 152, 111, 88, 81, 94, 115, 123, 127, 122, 125, 125, 122, 121, 119, 116, 118, 121, 115, 125, 133, 122, 120, 116, 124, 126, 126, 128, 134, 158, 203, 212, 203, 198, 189, 170, 165, 148, 129, 106, 94, 93, 95, 96, 100, 102, 99, 96, 94, 96, 100, 107, 99, 92, 95, 100, 98, 92, 91, 94, 97, 98, 98, 98, 99, 92, 93, 94, 93, 92, 93, 96, 94, 94, 93, 91, 90, 89, 89, 88, 88, 89, 89, 89, 92, 95, 97, 93, 87, 85, 87, 90, 92, 98, 97, 94, 93, 94, 94, 92, 96, 98, 98, 97, 96, 95, 94, 94, 94, 95, 95, 95, 96, 99, 101, 104, 106, 108, 107, 107, 107, 101, 100, 102, 103, 103, 103, 102, 103, 107, 111, 114, 113, 113, 113, 109, 110, 114, 116, 120, 128, 137, 135, 137, 144, 148, 149, 149, 149, 144, 143, 147, 152, 156, 159, 159, 154, 152, 154, 154, 154, 154, 153, 155, 156, 156, 158, 161, 164, 166, 166, 164, 163, 164, 168, 172, 175, 173, 172, 173, 176, 178, 181, 183, 185, 180, 172, 174, 184, 188, 184, 181, 182, 188, 180, 160, 144, 124, 111, 123, 126, 118, 124, 121, 118, 120, 122, 125, 125, 120, 118, 122, 122, 114, 113, 114, 93, 91, 118, 170, 180, 67, 43, 40, 35, 34, 32, 31, 31, 32, 32, 32, 33, 33, 32, 32, 32, 41, 41, 41, 38, 37, 38, 38, 38, 37, 35, 33, 32, 31, 31, 28, 38, 34, 54, 149, 168, 154, 122, 93, 78, 89, 110, 124, 129, 129, 131, 131, 128, 126, 124, 119, 117, 127, 116, 114, 114, 107, 116, 131, 116, 117, 128, 158, 198, 228, 219, 191, 152, 122, 106, 101, 101, 103, 91, 79, 79, 87, 91, 92, 91, 91, 90, 92, 93, 92, 89, 86, 82, 80, 81, 83, 84, 83, 88, 91, 91, 87, 83, 81, 81, 94, 98, 100, 99, 96, 96, 98, 98, 99, 103, 107, 110, 111, 112, 111, 112, 111, 107, 101, 98, 99, 101, 100, 95, 93, 91, 91, 92, 95, 93, 91, 94, 98, 98, 93, 86, 87, 90, 94, 96, 97, 98, 93, 91, 90, 93, 95, 94, 92, 90, 91, 96, 94, 89, 84, 81, 78, 77, 78, 80, 83, 82, 79, 80, 83, 85, 87, 90, 91, 93, 89, 86, 84, 83, 83, 83, 84, 79, 80, 81, 81, 81, 81, 82, 88, 90, 90, 88, 85, 81, 78, 78, 79, 81, 84, 87, 86, 84, 85, 87, 87, 88, 90, 93, 96, 95, 93, 93, 98, 105, 112, 115, 127, 135, 140, 145, 150, 157, 163, 165, 171, 176, 172, 161, 158, 164, 176, 174, 168, 166, 159, 154, 150, 146, 131, 110, 110, 119, 123, 118, 117, 119, 121, 125, 122, 118, 119, 121, 115, 115, 115, 95, 85, 114, 169, 181, 68, 41, 39, 36, 31, 32, 33, 34, 34, 34, 33, 33, 33, 34, 34, 34, 41, 41, 41, 38, 37, 38, 38, 37, 36, 35, 33, 32, 31, 30, 28, 36, 34, 51, 142, 168, 158, 124, 96, 79, 90, 113, 126, 132, 131, 134, 134, 130, 129, 126, 121, 119, 120, 118, 114, 114, 119, 125, 113, 98, 134, 182, 222, 232, 189, 146, 123, 101, 97, 103, 103, 96, 86, 85, 84, 84, 86, 89, 93, 92, 91, 91, 92, 93, 93, 92, 89, 92, 95, 95, 94, 94, 96, 86, 88, 93, 93, 90, 86, 83, 91, 94, 94, 92, 88, 85, 83, 86, 91, 93, 90, 85, 82, 82, 81, 82, 85, 86, 86, 88, 90, 90, 90, 91, 94, 98, 102, 105, 105, 103, 101, 103, 107, 107, 104, 110, 112, 112, 111, 110, 108, 107, 106, 103, 102, 106, 110, 106, 98, 95, 99, 105, 106, 104, 101, 100, 95, 94, 96, 98, 99, 98, 95, 99, 100, 100, 99, 98, 98, 97, 99, 99, 99, 98, 99, 100, 101, 101, 101, 101, 99, 96, 94, 94, 92, 92, 94, 98, 100, 100, 100, 99, 98, 100, 103, 104, 103, 100, 104, 106, 104, 101, 100, 100, 100, 102, 101, 97, 95, 95, 95, 95, 97, 100, 101, 102, 105, 111, 117, 126, 129, 133, 148, 166, 176, 178, 180, 178, 175, 183, 179, 158, 163, 162, 122, 108, 124, 116, 116, 119, 117, 118, 119, 124, 121, 117, 118, 120, 114, 114, 114, 94, 84, 113, 168, 180, 68, 41, 38, 35, 30, 33, 36, 36, 35, 34, 33, 32, 33, 34, 34, 34, 41, 41, 41, 38, 37, 38, 38, 37, 36, 34, 33, 31, 31, 30, 26, 33, 34, 46, 134, 170, 163, 123, 96, 78, 89, 112, 127, 133, 131, 136, 135, 130, 128, 125, 122, 125, 111, 111, 115, 116, 118, 113, 126, 162, 190, 199, 188, 156, 125, 101, 98, 97, 96, 96, 94, 92, 86, 92, 98, 98, 95, 93, 93, 97, 97, 97, 99, 102, 103, 101, 96, 94, 92, 90, 92, 93, 94, 91, 93, 94, 96, 97, 97, 97, 102, 105, 109, 111, 111, 107, 103, 94, 99, 105, 104, 101, 101, 105, 102, 100, 99, 98, 97, 96, 95, 97, 97, 96, 94, 93, 92, 92, 95, 94, 92, 91, 93, 93, 92, 88, 88, 89, 92, 94, 97, 98, 93, 91, 91, 92, 93, 93, 92, 98, 102, 103, 102, 99, 99, 99, 95, 95, 98, 98, 98, 96, 95, 98, 99, 100, 100, 100, 100, 100, 101, 100, 100, 100, 100, 99, 99, 96, 97, 97, 96, 95, 96, 99, 99, 98, 98, 97, 94, 90, 88, 90, 91, 92, 95, 97, 95, 92, 95, 97, 97, 97, 98, 101, 102, 103, 101, 99, 99, 102, 103, 102, 100, 101, 100, 98, 95, 94, 95, 95, 100, 106, 105, 102, 106, 118, 129, 140, 140, 148, 165, 164, 171, 175, 154, 125, 114, 119, 116, 113, 116, 116, 118, 122, 119, 115, 117, 118, 112, 112, 112, 92, 82, 111, 166, 179, 68, 43, 42, 39, 35, 33, 32, 33, 33, 33, 33, 33, 34, 34, 34, 34, 41, 41, 41, 38, 37, 38, 38, 37, 35, 34, 32, 31, 30, 29, 27, 30, 36, 42, 126, 170, 165, 124, 95, 75, 82, 102, 115, 121, 133, 140, 140, 135, 131, 128, 126, 120, 115, 120, 121, 106, 107, 136, 220, 239, 194, 143, 105, 83, 103, 106, 102, 95, 89, 91, 102, 115, 139, 136, 129, 123, 119, 118, 117, 112, 115, 122, 134, 145, 151, 153, 165, 163, 157, 147, 130, 109, 92, 97, 91, 80, 75, 75, 80, 84, 76, 77, 83, 88, 92, 92, 89, 93, 97, 98, 96, 92, 91, 92, 99, 100, 101, 106, 110, 113, 114, 103, 103, 106, 111, 115, 119, 122, 120, 118, 117, 115, 115, 116, 117, 118, 116, 114, 111, 108, 107, 107, 101, 101, 102, 102, 101, 103, 109, 107, 107, 106, 102, 98, 97, 97, 94, 96, 98, 97, 94, 92, 91, 95, 98, 98, 98, 99, 99, 99, 97, 96, 97, 97, 97, 95, 95, 93, 94, 93, 92, 90, 92, 95, 94, 96, 99, 102, 105, 106, 106, 104, 104, 106, 110, 114, 114, 112, 114, 115, 114, 113, 114, 115, 117, 121, 120, 117, 114, 110, 106, 102, 106, 110, 114, 114, 112, 111, 111, 119, 117, 110, 116, 126, 126, 116, 106, 108, 105, 95, 113, 128, 130, 138, 157, 140, 109, 118, 113, 108, 114, 114, 116, 120, 118, 114, 115, 116, 110, 110, 111, 91, 81, 110, 164, 177, 67, 45, 45, 43, 39, 34, 30, 31, 32, 33, 33, 33, 34, 34, 34, 34, 41, 41, 41, 38, 37, 38, 38, 36, 35, 33, 32, 31, 29, 29, 27, 28, 37, 39, 121, 171, 168, 127, 95, 74, 82, 100, 114, 118, 127, 133, 134, 128, 123, 121, 120, 113, 111, 111, 115, 102, 114, 185, 230, 179, 124, 109, 106, 106, 101, 101, 100, 104, 113, 117, 109, 98, 82, 72, 65, 68, 75, 77, 73, 77, 76, 76, 76, 73, 67, 61, 65, 77, 94, 109, 119, 129, 136, 137, 136, 136, 135, 129, 117, 107, 102, 96, 88, 85, 85, 84, 82, 80, 79, 78, 78, 81, 83, 84, 95, 94, 92, 93, 94, 93, 90, 93, 94, 95, 97, 97, 98, 97, 98, 97, 98, 97, 98, 102, 106, 107, 107, 107, 107, 109, 111, 113, 110, 107, 106, 108, 110, 110, 107, 104, 109, 114, 117, 117, 116, 115, 112, 113, 117, 116, 111, 108, 109, 112, 114, 114, 114, 113, 113, 113, 113, 113, 114, 115, 114, 112, 111, 116, 118, 116, 112, 110, 110, 113, 114, 114, 114, 113, 112, 109, 107, 107, 108, 109, 111, 111, 109, 105, 109, 111, 109, 108, 106, 107, 108, 106, 105, 105, 107, 110, 110, 109, 104, 102, 102, 101, 100, 101, 104, 102, 100, 101, 99, 95, 96, 101, 104, 103, 106, 105, 103, 113, 108, 101, 113, 127, 121, 108, 111, 112, 112, 113, 115, 119, 117, 113, 114, 115, 109, 109, 109, 90, 80, 109, 163, 177, 67, 45, 44, 41, 36, 34, 33, 33, 34, 34, 33, 33, 33, 34, 34, 34, 39, 40, 41, 39, 38, 40, 42, 39, 38, 36, 35, 34, 34, 35, 27, 33, 35, 38, 121, 167, 170, 135, 98, 76, 82, 101, 119, 122, 123, 128, 128, 126, 124, 121, 115, 115, 116, 107, 100, 109, 140, 182, 162, 99, 85, 96, 92, 107, 102, 101, 104, 93, 86, 74, 62, 71, 96, 124, 149, 172, 174, 151, 143, 143, 142, 144, 151, 153, 140, 120, 113, 103, 92, 84, 71, 65, 71, 78, 81, 83, 87, 95, 105, 110, 124, 134, 144, 151, 146, 136, 127, 119, 116, 113, 109, 105, 102, 100, 95, 90, 85, 84, 86, 87, 86, 82, 81, 81, 81, 81, 81, 81, 82, 83, 84, 84, 84, 83, 83, 86, 87, 87, 87, 85, 84, 82, 86, 86, 84, 84, 85, 86, 85, 92, 97, 97, 97, 94, 92, 91, 93, 96, 99, 97, 93, 91, 91, 93, 95, 100, 105, 107, 108, 108, 104, 100, 98, 99, 102, 101, 96, 96, 96, 93, 92, 92, 93, 93, 93, 92, 92, 91, 91, 91, 92, 90, 91, 91, 89, 89, 90, 92, 92, 90, 87, 89, 93, 94, 91, 93, 91, 86, 84, 88, 89, 86, 86, 87, 87, 87, 88, 91, 93, 94, 92, 89, 91, 94, 98, 105, 108, 100, 95, 101, 102, 102, 100, 105, 104, 112, 108, 110, 108, 103, 103, 115, 108, 103, 113, 109, 105, 114, 110, 106, 114, 92, 69, 106, 161, 179, 67, 47, 42, 42, 33, 33, 33, 35, 36, 36, 36, 35, 35, 36, 35, 34, 40, 42, 42, 40, 39, 41, 43, 40, 39, 37, 36, 36, 36, 37, 28, 35, 35, 39, 117, 166, 171, 137, 98, 76, 79, 97, 118, 124, 126, 127, 127, 127, 125, 122, 120, 116, 116, 109, 120, 153, 166, 145, 100, 101, 94, 92, 98, 87, 90, 87, 97, 103, 131, 163, 177, 193, 212, 218, 207, 197, 183, 163, 166, 164, 170, 173, 177, 192, 215, 230, 215, 191, 178, 183, 182, 171, 162, 138, 135, 126, 111, 101, 96, 90, 75, 69, 68, 72, 77, 80, 81, 101, 101, 101, 108, 117, 121, 121, 133, 130, 125, 124, 127, 131, 132, 136, 136, 134, 132, 130, 129, 130, 124, 124, 125, 124, 121, 118, 115, 111, 111, 112, 115, 115, 115, 114, 105, 101, 99, 97, 96, 97, 99, 101, 101, 102, 102, 102, 102, 103, 99, 90, 82, 86, 94, 91, 82, 77, 77, 80, 83, 86, 87, 85, 87, 88, 88, 86, 86, 88, 89, 90, 88, 84, 88, 92, 92, 88, 87, 90, 93, 98, 98, 96, 95, 94, 98, 104, 109, 114, 120, 125, 116, 117, 125, 124, 122, 127, 137, 129, 130, 138, 136, 130, 130, 137, 132, 129, 132, 135, 137, 138, 138, 138, 136, 134, 132, 127, 122, 125, 127, 130, 138, 144, 139, 139, 151, 144, 132, 115, 114, 93, 110, 114, 108, 105, 106, 106, 110, 107, 107, 113, 110, 105, 115, 92, 65, 104, 162, 177, 66, 48, 41, 42, 33, 32, 33, 34, 36, 37, 36, 36, 36, 36, 35, 34, 44, 45, 44, 42, 40, 41, 43, 40, 39, 37, 36, 36, 36, 37, 29, 34, 36, 40, 106, 168, 172, 139, 101, 78, 77, 92, 115, 123, 127, 122, 125, 127, 121, 120, 129, 121, 105, 120, 157, 165, 139, 111, 87, 93, 92, 92, 86, 83, 108, 146, 176, 198, 209, 210, 195, 182, 179, 186, 187, 187, 184, 177, 181, 192, 185, 175, 173, 186, 203, 212, 198, 198, 205, 210, 202, 193, 191, 198, 202, 200, 197, 199, 203, 205, 196, 188, 179, 174, 171, 164, 156, 138, 127, 119, 118, 118, 114, 106, 101, 96, 88, 82, 81, 81, 83, 78, 77, 76, 75, 75, 75, 76, 83, 86, 88, 90, 91, 91, 90, 94, 97, 101, 105, 108, 111, 113, 116, 117, 118, 120, 124, 127, 131, 135, 136, 136, 136, 137, 137, 138, 141, 143, 145, 143, 140, 141, 145, 145, 142, 140, 143, 148, 148, 145, 139, 140, 142, 141, 138, 140, 144, 144, 138, 130, 130, 134, 139, 141, 135, 134, 137, 138, 133, 126, 120, 115, 116, 119, 118, 113, 109, 107, 101, 94, 87, 86, 89, 89, 86, 88, 87, 83, 84, 86, 83, 76, 70, 69, 73, 76, 77, 77, 75, 74, 74, 77, 83, 83, 79, 80, 82, 8
[truncated: 1,879,096 more chars]
